# Supplementary material
Source: Research Square preprint supplement (doi:10.21203/rs.3.rs-10290866/v1)
Supplement: Supplementary file 1 [file 16454f70467438a07ee9a382.xlsx]

## Sheet: Description
	Metabolomic and proteomic pathway enrichment analyses associated with maternal balanced energy–protein (BEP) supplementation. This table summarizes pathway enrichment analyses performed using metabolomic and proteomic features associated with maternal BEP supplementation. Separate worksheets provide pathway-level enrichment results and the individual metabolomic or proteomic features contributing…
Worksheet: metabolome_pathway	This worksheet summarizes metabolomic pathway enrichment analyses performed for each biological dataset. Pathways were identified using significantly associated metabolomic features and are presented together with enrichment statistics and the contributing metabolites.
dataset:	Biological dataset in which pathway enrichment was performed.
pathway:	Name of the enriched metabolic pathway.
overlap_size:	Number of detected features mapped to the pathway.
pathway_size:	Total number of compounds contained in the reference pathway.
ion_mode:	LC–MS ionization mode used for feature detection (positive or negative).
direction:	Direction of association with BEP supplementation (higher or lower abundance in the BEP group).
p-value:	Nominal enrichment P value.
enrichmentScore:	Enrichment score calculated for the pathway.
signed_enrichment:	Signed enrichment score indicating both enrichment magnitude and direction.
overlap_EmpiricalCompounds (id):	Empirical compound identifiers mapped to the enriched pathway.
overlap_features (id):	Feature identifiers contributing to pathway enrichment.
overlap_features (name):	Putative metabolite annotations corresponding to the contributing features.
source:	Pathway database used for enrichment analysis.
Worksheet: metabolome_feature	This worksheet lists the metabolomic features contributing to each enriched pathway together with their putative compound annotations and estimated intervention effects.
pathway:	Enriched pathway containing the feature.
feature:	Feature name or identifier.
sample_type:	Biological sample in which the feature was detected.
feature_id:	Unique feature identifier.
mz:	Mass-to-charge ratio (m/z) of the detected feature.
rt:	Retention time of the detected feature.
ionization_mode:	LC–MS ionization mode (positive or negative).
compound_eid:	Empirical compound identifier assigned during annotation.
compound:	Putative metabolite annotation.
beta:	Standardized effect estimate, with positive values indicating higher abundance and negative values indicating lower abundance in the BEP group.
Worksheet: proteome_pathways	This worksheet summarizes pathway enrichment analyses performed using BEP-associated proteins identified across the proteomic datasets.
ID:	Pathway identifier.
Description:	Pathway name or description.
GeneRatio:	Ratio of input proteins mapped to the pathway.
BgRatio:	Ratio of background proteins mapped to the pathway.
RichFactor:	Ratio of mapped proteins to the total number of proteins in the pathway.
FoldEnrichment:	Fold enrichment relative to the background.
zScore:	Standardized enrichment score.
pvalue:	Nominal enrichment P value.
p.adjust:	False discovery rate (FDR)-adjusted P value.
qvalue:	Q value for pathway enrichment.
geneID:	UniProt or gene identifiers contributing to the pathway.
Count:	Number of proteins contributing to pathway enrichment.
direction:	Direction of association with BEP supplementation (higher or lower abundance in the BEP group).
source:	Pathway database used for enrichment analysis.
category:	Broad functional category of the pathway.
subcategory:	Functional subcategory of the pathway.
signed_ES:	Signed enrichment score indicating enrichment magnitude and direction.
qval:	FDR-adjusted significance value used for visualization.
dataset:	Proteomic dataset in which the pathway was identified.
Worksheet: proteome_feature	This worksheet lists the proteins contributing to each enriched pathway.
pathway:	Enriched pathway containing the protein.
geneID:	Gene or UniProt identifier.
dataset:	Proteomic dataset in which the protein was detected.
sample_type:	Biological sample in which the protein was measured.
direction_clean:	Direction of association with BEP supplementation (higher or lower abundance in the BEP group).
symbol:	Official gene symbol.
protein_name:	Full protein name.
uniprot:	UniProt accession number.

## Sheet: metabolome_pathway
dataset	pathway	overlap_size	pathway_size	ion_mode	direction	p-value	enrichmentScore	signed_enrichment	overlap_EmpiricalCompounds (id)	overlap_features (id)	overlap_features (name)	source
plasma_tri2	Alanine and Aspartate Metabolism	1	2	Positive	up-regulated	0.0414251	0.5	0.5	E5	C00327	L-Citrulline; 2-Amino-5-ureidovaleric acid; Citrulline	up_pos
plasma_tri2	Alkaloid biosynthesis II	1	2	Negative	down-regulated	0.00210066	0.5	-0.5	E10	C00180/C00633	Benzoate; Benzoic acid; Benzenecarboxylic acid; Phenylformic acid; Dracylic acid/4-Hydroxybenzaldehyde; p-Hydroxybenzaldehyde	down_neg
plasma_tri2	Androgen and estrogen biosynthesis and metabolism	1	1	Positive	down-regulated	0.0261323	1	-1	E6	C04042/C01953/C03681	20alpha-Hydroxy-4-pregnen-3-one; 20alpha-Hydroxypregn-4-en-3-one; 20alpha-Hydroxyprogesterone/Pregnenolone; 5-Pregnen-3beta-ol-20-one; 3beta-Hydroxypregn-5-en-20-one/5alpha-Pregnane-3,20-dione	down_pos
plasma_tri2	Arachidonic acid metabolism	2	2	Positive	up-regulated	0.00151248	1	1	E12,E11	C14774/C14775/C14772/C14773,C04805/C04742/C14749/C14748/C14778/C14770/C14771/C14769/C14768/CE5016	11,12-DHET/14,15-DHET; (5Z,8Z,11Z)-14,15-Dihydroxyeicosa-5,8,11-trienoic acid; (5Z,8Z,11Z)-14,15-Dihydroxyicosa-5,8,11-trienoic acid/5,6-DHET; (8Z,11Z,14Z)-5,6-Dihydroxyeicosa-8,11,14-trienoic acid; (8Z,11Z,14Z)-5,6-Dihydroxyicosa-8,11,14-trienoic acid/8,9-DHET; (5Z,11Z,14Z)-8,9-Dihydroxyeicosa-5,11,14-trienoic acid; (5Z,11Z,14Z)-8,9-Dihydroxyicosa-5,11,14-trienoic acid$5-Hydroxyeicosatetraenoate…	up_pos
plasma_tri2	Arginine and Proline Metabolism	1	2	Positive	up-regulated	0.0414251	0.5	0.5	E5	C00327	L-Citrulline; 2-Amino-5-ureidovaleric acid; Citrulline	up_pos
plasma_tri2	Aspartate and asparagine metabolism	1	2	Positive	up-regulated	0.0414251	0.5	0.5	E5	C00327	L-Citrulline; 2-Amino-5-ureidovaleric acid; Citrulline	up_pos
plasma_tri2	Bile acid biosynthesis	2	3	Negative	up-regulated	0.00621796	0.666667	0.666667	E43,E41	CE4872/C01301,C05457/C01673/CE2201/C17336/C17331/C17333/C17332	3alpha,7alpha,12alpha-trihydroxy-5beta-cholestan-27-al/3alpha,7alpha,12alpha-Trihydroxy-5beta-cholestan-26-al$7alpha,12alpha-Dihydroxycholest-4-en-3-one/Calcitriol/23S,25-dihydroxyvitamin D3/7alpha,26-Dihydroxy-4-cholesten-3-one///7alpha,25-Dihydroxy-4-cholesten-3-one	up_neg
plasma_tri2	C21-steroid hormone biosynthesis and metabolism	2	3	Positive	down-regulated	0.0282329	0.666667	-0.666667	E5,E6	C00486,C04042/C01953/C03681	Bilirubin$20alpha-Hydroxy-4-pregnen-3-one; 20alpha-Hydroxypregn-4-en-3-one; 20alpha-Hydroxyprogesterone/Pregnenolone; 5-Pregnen-3beta-ol-20-one; 3beta-Hydroxypregn-5-en-20-one/5alpha-Pregnane-3,20-dione	down_pos
plasma_tri2	Carnitine shuttle	2	2	Positive	down-regulated	0.012604	1	-1	E9,E10	c226crn,dlnlcgcrn	cervonyl carnitine$dihomo-gamma-linolenyl carnitine	down_pos
plasma_tri2	CoA Catabolism	1	1	Negative	up-regulated	0.0263843	1	1	E35	C00864	(R)-Pantothenate	up_neg
plasma_tri2	Glycerophospholipid metabolism	1	1	Positive	up-regulated	0.0155449	1	1	E11	C04805/C04742/C14749/C14748/C14778/C14770/C14771/C14769/C14768/CE5016	5-Hydroxyeicosatetraenoate/(15S)-15-Hydroxy-5,8,11-cis-13-trans-eicosatetraenoate; (15S)-15-Hydroxy-5,8,11-cis-13-trans-icosatetraenoate; (5Z,8Z,11Z,13E)-(15S)-15-Hydroxyicosa-5,8,11,13-tetraenoic acid; 15(S)-HETE/19(S)-HETE; (19S)-Hydroxyeicosatetraenoic acid; (19S)-Hydroxyicosatetraenoic acid; (19S)-Hydroxy arachidonic acid/20-Hydroxyeicosatetraenoic acid/16(R)-HETE; (5Z,8Z,11Z,14Z)-(16R)-16-Hy…	up_pos
plasma_tri2	Linoleate metabolism	2	5	Negative	up-regulated	0.0255441	0.4	0.4	E54,E9	C14762/C14826/C14825,C06426/C06427	13(S)-HODE; (13S)-Hydroxyoctadecadienoic acid; (9Z, 11E)-(13S)-13-Hydroxyoctadeca-9,11-dienoic acid/12(13)-EpOME; (12R,13S)-(9Z)-12,13-Epoxyoctadecenoic acid/9(10)-EpOME; (9R,10S)-(12Z)-9,10-Epoxyoctadecenoic acid$(6Z,9Z,12Z)-Octadecatrienoic acid; 6,9,12-Octadecatrienoic acid; gamma-Linolenic acid; Gamolenic acid/(9Z,12Z,15Z)-Octadecatrienoic acid; alpha-Linolenic acid; 9,12,15-Octadecatrienoic …	up_neg
plasma_tri2	Omega-3 fatty acid metabolism	1	1	Negative	up-regulated	0.0263843	1	1	E9	C06426/C06427	(6Z,9Z,12Z)-Octadecatrienoic acid; 6,9,12-Octadecatrienoic acid; gamma-Linolenic acid; Gamolenic acid/(9Z,12Z,15Z)-Octadecatrienoic acid; alpha-Linolenic acid; 9,12,15-Octadecatrienoic acid; Linolenate; alpha-Linolenate	up_neg
plasma_tri2	Porphyrin metabolism	1	1	Positive	down-regulated	0.0261323	1	-1	E5	C00486	Bilirubin	down_pos
plasma_tri2	Tryptophan metabolism	1	3	Positive	down-regulated	0.0323502	0.333333	-0.333333	E18	CE2152	NA	down_pos
plasma_tri2	Tyrosine metabolism	1	1	Positive	down-regulated	0.0261323	1	-1	E23	CE5541	adrenochrome o-semiquinone	down_pos
plasma_tri2	Ubiquinone Biosynthesis	1	1	Negative	up-regulated	0.0263843	1	1	E6	C05350/C01197/C01179	2-Hydroxy-3-(4-hydroxyphenyl)propenoate; 4-Hydroxy-enol-phenylpyruvate/Caffeate; Caffeic acid; 3,4-Dihydroxy-trans-cinnamate; trans-Caffeate/3-(4-Hydroxyphenyl)pyruvate	up_neg
plasma_tri2	Urea cycle/amino group metabolism	2	2	Positive	up-regulated	0.00151248	1	1	E5,E9	C00327,C00791	L-Citrulline; 2-Amino-5-ureidovaleric acid; Citrulline$	up_pos
plasma_tri2	Vitamin A (retinol) metabolism	1	1	Positive	up-regulated	0.0155449	1	1	E11	C04805/C04742/C14749/C14748/C14778/C14770/C14771/C14769/C14768/CE5016	5-Hydroxyeicosatetraenoate/(15S)-15-Hydroxy-5,8,11-cis-13-trans-eicosatetraenoate; (15S)-15-Hydroxy-5,8,11-cis-13-trans-icosatetraenoate; (5Z,8Z,11Z,13E)-(15S)-15-Hydroxyicosa-5,8,11,13-tetraenoic acid; 15(S)-HETE/19(S)-HETE; (19S)-Hydroxyeicosatetraenoic acid; (19S)-Hydroxyicosatetraenoic acid; (19S)-Hydroxy arachidonic acid/20-Hydroxyeicosatetraenoic acid/16(R)-HETE; (5Z,8Z,11Z,14Z)-(16R)-16-Hy…	up_pos
plasma_tri2	Vitamin B5 - CoA biosynthesis from pantothenate	1	1	Negative	up-regulated	0.0263843	1	1	E35	C00864	(R)-Pantothenate	up_neg
plasma_tri2	Vitamin B6 (pyridoxine) metabolism	1	1	Negative	up-regulated	0.0263843	1	1	E52	C00847	4-Pyridoxate; 4-Pyridoxic acid	up_neg
plasma_tri2	Vitamin D3 (cholecalciferol) metabolism	1	1	Negative	up-regulated	0.0263843	1	1	E41	C05457/C01673/CE2201/C17336/C17331/C17333/C17332	7alpha,12alpha-Dihydroxycholest-4-en-3-one/Calcitriol/23S,25-dihydroxyvitamin D3/7alpha,26-Dihydroxy-4-cholesten-3-one///7alpha,25-Dihydroxy-4-cholesten-3-one	up_neg
plasma_tri3	Ascorbate (Vitamin C) and Aldarate Metabolism	3	3	Negative	up-regulated	0.00235274	1	1	E33,E34,E11	C02045,C02045/C15587,C00425/C00417	$/Purine$Dehydroascorbate/cis-Aconitate; cis-Aconitic acid	up_neg
plasma_tri3	Beta-Alanine metabolism	1	1	Negative	down-regulated	0.0326863	1	-1	E7	C00256/C01013/C00186/C00184	D-Lactate/3-Hydroxypropanoate; 3-Hydroxypropanoic acid; 3-Hydroxypropionate; 3-Hydroxypropionic acid; Hydracrylic acid/L-Lactate/Dihydroxyacetone	down_neg
plasma_tri3	Bile acid biosynthesis	1	1	Negative	down-regulated	0.0326863	1	-1	E26	CE1277/CE1278/CE1279/CE4874	5beta-cholestane-3alpha,7alpha,12alpha,23,25-pentol/5beta-cholestane-3alpha,7alpha,12alpha,25,27-pentol/5beta-cholestane-3alpha,7alpha,12alpha,24R,25-pentol/5beta-cholestane-3alpha,7alpha,12alpha,27,27-pentaol	down_neg
plasma_tri3	Butanoate metabolism	1	2	Positive	down-regulated	0.00890681	0.5	-0.5	E13	C00719/C00431/C00183	Glycine betaine/5-Aminopentanoate; 5-Aminopentanoic acid; 5-Aminovaleric acid/L-Valine	down_pos
plasma_tri3	Butanoate metabolism	2	3	Negative	up-regulated	0.0314259	0.666667	0.666667	E31,E43	C00033/C00266,C00900/C06010	Acetate/Glycolaldehyde$2-Acetolactate/(S)-2-Acetolactate; (S)-2-Hydroxy-2-methyl-3-oxobutanoate	up_neg
plasma_tri3	C21-steroid hormone biosynthesis and metabolism	1	2	Positive	down-regulated	0.00890681	0.5	-0.5	E9	C00486	Bilirubin	down_pos
plasma_tri3	Chondroitin sulfate degradation	1	1	Negative	down-regulated	0.0326863	1	-1	E17	C00059	Sulfate	down_neg
plasma_tri3	Glycerophospholipid metabolism	2	5	Negative	down-regulated	0.0436098	0.4	-0.4	E7,E4	C00256/C01013/C00186/C00184,C00031/C00221/C02336/C00267/C00962/C00795/C00137/C13747/C07480/C00984/C00159	D-Lactate/3-Hydroxypropanoate; 3-Hydroxypropanoic acid; 3-Hydroxypropionate; 3-Hydroxypropionic acid; Hydracrylic acid/L-Lactate/Dihydroxyacetone$D-Glucose/beta-D-Glucose/beta-D-Fructose; beta-Fruit sugar; beta-D-arabino-Hexulose; beta-Levulose; Fructose/alpha-D-Glucose/beta-D-Galactose/D-Tagatose; lyxo-Hexulose/myo-Inositol/1,7-Dimethylxanthine; Paraxanthine//alpha-D-Galactose/D-Mannose	down_neg
plasma_tri3	Glycine, serine, alanine and threonine metabolism	1	5	Positive	down-regulated	0.0282329	0.2	-0.2	E13	C00719/C00431/C00183	Glycine betaine/5-Aminopentanoate; 5-Aminopentanoic acid; 5-Aminovaleric acid/L-Valine	down_pos
plasma_tri3	Glycolysis and Gluconeogenesis	2	3	Negative	down-regulated	0.0069742	0.666667	-0.666667	E7,E4	C00256/C01013/C00186/C00184,C00031/C00221/C02336/C00267/C00962/C00795/C00137/C13747/C07480/C00984/C00159	D-Lactate/3-Hydroxypropanoate; 3-Hydroxypropanoic acid; 3-Hydroxypropionate; 3-Hydroxypropionic acid; Hydracrylic acid/L-Lactate/Dihydroxyacetone$D-Glucose/beta-D-Glucose/beta-D-Fructose; beta-Fruit sugar; beta-D-arabino-Hexulose; beta-Levulose; Fructose/alpha-D-Glucose/beta-D-Galactose/D-Tagatose; lyxo-Hexulose/myo-Inositol/1,7-Dimethylxanthine; Paraxanthine//alpha-D-Galactose/D-Mannose	down_neg
plasma_tri3	Glycolysis and Gluconeogenesis	2	2	Negative	up-regulated	0.009495	1	1	E31,E43	C00033/C00266,C00900/C06010	Acetate/Glycolaldehyde$2-Acetolactate/(S)-2-Acetolactate; (S)-2-Hydroxy-2-methyl-3-oxobutanoate	up_neg
plasma_tri3	Glycosphingolipid metabolism	2	3	Negative	down-regulated	0.0069742	0.666667	-0.666667	E17,E4	C00059,C00031/C00221/C02336/C00267/C00962/C00795/C00137/C13747/C07480/C00984/C00159	Sulfate$D-Glucose/beta-D-Glucose/beta-D-Fructose; beta-Fruit sugar; beta-D-arabino-Hexulose; beta-Levulose; Fructose/alpha-D-Glucose/beta-D-Galactose/D-Tagatose; lyxo-Hexulose/myo-Inositol/1,7-Dimethylxanthine; Paraxanthine//alpha-D-Galactose/D-Mannose	down_neg
plasma_tri3	Heparan sulfate degradation	1	1	Negative	down-regulated	0.0326863	1	-1	E17	C00059	Sulfate	down_neg
plasma_tri3	Keratan sulfate degradation	1	1	Negative	down-regulated	0.0326863	1	-1	E17	C00059	Sulfate	down_neg
plasma_tri3	Methionine and cysteine metabolism	1	1	Negative	down-regulated	0.0326863	1	-1	E17	C00059	Sulfate	down_neg
plasma_tri3	Methionine and cysteine metabolism	3	6	Negative	up-regulated	0.0478111	0.5	0.5	E31,E6,E4	C00033/C00266,C05844,C01755	Acetate/Glycolaldehyde$5-L-Glutamyl-taurine$Thiocyanate	up_neg
plasma_tri3	Porphyrin metabolism	1	2	Positive	down-regulated	0.00890681	0.5	-0.5	E9	C00486	Bilirubin	down_pos
plasma_tri3	Propanoate metabolism	1	1	Negative	down-regulated	0.0326863	1	-1	E7	C00256/C01013/C00186/C00184	D-Lactate/3-Hydroxypropanoate; 3-Hydroxypropanoic acid; 3-Hydroxypropionate; 3-Hydroxypropionic acid; Hydracrylic acid/L-Lactate/Dihydroxyacetone	down_neg
plasma_tri3	Pyrimidine metabolism	1	1	Negative	down-regulated	0.0326863	1	-1	E1	C00239	dCMP	down_neg
plasma_tri3	Pyruvate Metabolism	1	1	Negative	down-regulated	0.0326863	1	-1	E7	C00256/C01013/C00186/C00184	D-Lactate/3-Hydroxypropanoate; 3-Hydroxypropanoic acid; 3-Hydroxypropionate; 3-Hydroxypropionic acid; Hydracrylic acid/L-Lactate/Dihydroxyacetone	down_neg
plasma_tri3	TCA cycle	2	2	Negative	up-regulated	0.009495	1	1	E31,E11	C00033/C00266,C00425/C00417	Acetate/Glycolaldehyde$Dehydroascorbate/cis-Aconitate; cis-Aconitic acid	up_neg
plasma_tri3	Valine, leucine and isoleucine degradation	1	2	Positive	down-regulated	0.00890681	0.5	-0.5	E13	C00719/C00431/C00183	Glycine betaine/5-Aminopentanoate; 5-Aminopentanoic acid; 5-Aminovaleric acid/L-Valine	down_pos
plasma_pn12	Ascorbate (Vitamin C) and Aldarate Metabolism	1	1	Positive	up-regulated	0.0302496	1	1	E24	C02477	alpha-Tocopherol; Vitamin E	up_pos
plasma_pn12	Aspartate and asparagine metabolism	3	11	Negative	up-regulated	0.0473069	0.272727	0.272727	E115,E72,E117	C05984/C01089/C03197/C06001/C00989,C02630/C01087/C03196/C02266,C01127/C05946	2-Hydroxybutyrate/(R)-3-Hydroxybutanoate; (R)-3-Hydroxybutanoic acid; (R)-3-Hydroxybutyric acid/(S)-3-Hydroxybutanoate/(S)-3-Hydroxyisobutyrate/4-Hydroxybutanoic acid; 4-Hydroxybutanoate; 4-Hydroxybutyric acid$(S)-2-Hydroxyglutarate/(R)-2-Hydroxyglutarate/(S)-2-Hydroxyglutarate/$4-Hydroxy-2-oxoglutarate; 4-Hydroxy-2-oxoglutaric acid/4-Hydroxy-2-oxoglutarate	up_neg
plasma_pn12	Blood Group Biosynthesis	1	1	Negative	up-regulated	0.0392404	1	1	E137	C00055	CMP	up_neg
plasma_pn12	C5-Branched dibasic acid metabolism	2	4	Negative	up-regulated	0.0211747	0.5	0.5	E95,E81	C01732/C00490,C00022/C00222	Mesaconate; 2-Methylfumarate; Mesaconic acid; Methylfumaric acid/Itaconate; Itaconic acid; Methylenesuccinic acid$Pyruvate/3-Oxopropanoate; Malonate semialdehyde	up_neg
plasma_pn12	C5-Branched dibasic acid metabolism	1	1	Positive	up-regulated	0.0302496	1	1	E33	C01732/C00490	Mesaconate; 2-Methylfumarate; Mesaconic acid; Methylfumaric acid/Itaconate; Itaconic acid; Methylenesuccinic acid	up_pos
plasma_pn12	Drug metabolism - other enzymes	1	1	Positive	down-regulated	0.0110915	1	-1	E3	C07585	N-Acetylisoniazid; (N)1-Acetylisoniazid	down_pos
plasma_pn12	Drug metabolism - other enzymes	1	1	Positive	up-regulated	0.0302496	1	1	E28	C04242	5-Fluorodeoxyuridine monophosphate	up_pos
plasma_pn12	Glycerophospholipid metabolism	4	12	Negative	up-regulated	0.0128561	0.333333	0.333333	E81,E88,E137,E30	C00022/C00222,C00258,C00055,C00570	Pyruvate/3-Oxopropanoate; Malonate semialdehyde$(R)-Glycerate$CMP$CDPethanolamine	up_neg
plasma_pn12	Glycosphingolipid biosynthesis - globoseries	1	1	Negative	up-regulated	0.0392404	1	1	E137	C00055	CMP	up_neg
plasma_pn12	Glycosphingolipid biosynthesis - lactoseries	1	1	Negative	up-regulated	0.0392404	1	1	E137	C00055	CMP	up_neg
plasma_pn12	Glycosphingolipid biosynthesis - neolactoseries	1	1	Negative	up-regulated	0.0392404	1	1	E137	C00055	CMP	up_neg
plasma_pn12	Glycosphingolipid metabolism	1	1	Negative	up-regulated	0.0392404	1	1	E137	C00055	CMP	up_neg
plasma_pn12	Keratan sulfate biosynthesis	1	1	Negative	up-regulated	0.0392404	1	1	E137	C00055	CMP	up_neg
plasma_pn12	N-Glycan biosynthesis	1	1	Negative	up-regulated	0.0392404	1	1	E137	C00055	CMP	up_neg
plasma_pn12	O-Glycan biosynthesis	1	1	Negative	up-regulated	0.0392404	1	1	E137	C00055	CMP	up_neg
plasma_pn12	Tyrosine metabolism	2	9	Positive	down-regulated	0.0233594	0.222222	-0.222222	E13,E11	C00355,CE5536/C01586	3,4-Dihydroxy-L-phenylalanine$adrenochrome/Hippurate; Hippuric acid; N-Benzoylglycine; Benzoylaminoacetic acid	down_pos
plasma_pn12	Vitamin B2 (riboflavin) metabolism	1	1	Negative	down-regulated	0.0318461	1	-1	E85	C01847	Reduced FMN; FMNH2	down_neg
plasma_pn12	Vitamin B9 (folate) metabolism	1	1	Negative	down-regulated	0.0318461	1	-1	E24	C03838	N1-(5-Phospho-D-ribosyl)glycinamide	down_neg
plasma_pn12	Vitamin E metabolism	2	5	Positive	up-regulated	0.0257121	0.4	0.4	E24,E23	C02477,CE5021	alpha-Tocopherol; Vitamin E$	up_pos
milk_1421	Ascorbate (Vitamin C) and Aldarate Metabolism	9	33	Negative	up-regulated	0.0432737	0.272727	0.272727	E589,E116,E570,E569,E598,E596,E580,E111,E832	C02477,C02670/C00072/glac,C01620,C01620,C00209,C00209,C02045,C02670/C00072/glac,C00425/C00417	alpha-Tocopherol; Vitamin E$D-glucurono-6,3-lactone/L-Ascorbate/D-glucurono-6,3-lactone$$$Oxalate; Oxalic acid; Ethanedioic acid$Oxalate; Oxalic acid; Ethanedioic acid$$D-glucurono-6,3-lactone/L-Ascorbate/D-glucurono-6,3-lactone$Dehydroascorbate/cis-Aconitate; cis-Aconitic acid	up_neg
milk_1421	Aspartate and asparagine metabolism	2	4	Positive	down-regulated	0.0296614	0.5	-0.5	E49,E29	CE5586/C00315,C05932	dehydrospermidine/Spermidine$N-Succinyl-L-glutamate 5-semialdehyde; (2S)-2-(3-Carboxypropanoylamino)-5-oxopentanoic acid	down_pos
milk_1421	Bile acid biosynthesis	6	19	Negative	up-regulated	0.0426015	0.315789	0.315789	E29,E444,E853,E23,E173,E851	C00937/C00424/C05235/C00163,C04483/C02528,C00020/C00362,C00937/C00424/C05235/C00163,C02592,C00020/C00362	(R)-Lactaldehyde; D-Lactaldehyde; D-2-Hydroxypropionaldehyde/(S)-Lactaldehyde; L-Lactaldehyde; L-2-Hydroxypropionaldehyde/Hydroxyacetone; Acetol; 1-Hydroxy-2-propanone; 2-Ketopropyl alcohol; Acetone alcohol; Pyruvinalcohol; Pyruvic alcohol; Methylketol/Propionate (n-C3:0)$3alpha,12alpha-Dihydroxy-5beta-cholanate; Deoxycholic acid; Deoxycholate; 3alpha,12alpha-Dihydroxy-5beta-cholanic acid/Chenode…	up_neg
milk_1421	Biopterin metabolism	4	5	Positive	up-regulated	0.00361314	0.8	0.8	E6,E45,E60,E59	C00272,C00440,C15522/thbpt4acam,C00268/C02953/C04244	Tetrahydrobiopterin$5-Methyltetrahydrofolate$Tetrahydrobiopterin-4a-carbinolamine/Tetrahydrobiopterin-4a-carbinolamine$6,7-Dihydrobiopterin/7,8-Dihydrobiopterin/6-Lactoyl-5,6,7,8-tetrahydropterin	up_pos
milk_1421	Chondroitin sulfate degradation	2	2	Positive	up-regulated	0.0206705	1	1	E24,E23	C00618/C06472/C00191,C00618/C06472/C00191	3-Dehydro-L-gulonate/L-Iduronic acid/D-Glucuronate$3-Dehydro-L-gulonate/L-Iduronic acid/D-Glucuronate	up_pos
milk_1421	CoA Catabolism	2	3	Positive	up-regulated	0.0491555	0.666667	0.666667	E71,E72	C00864,C00864	(R)-Pantothenate$(R)-Pantothenate	up_pos
milk_1421	De novo fatty acid biosynthesis	4	8	Negative	down-regulated	0.0226872	0.5	-0.5	E25,E15,E4,E24	vacccoa/C03035/C16162/od2coa/odecoa,CE5153,CE2243/CE5151/C03595,CE2248	vaccenyl coenzyme A/gamma-linolenoyl-CoA/alpha-Linolenoyl-CoA/trans-Octadec-2-enoyl-CoA/Octadecenoyl-CoA (n-C18:1CoA)$3(S)-hydroxy-13cis-docosenoyl-CoA$trans-eicos-2-enoyl-CoA/11-cis-eicosenoyl-CoA/dihomo-gamma-linolenyl coenzyme A$3-hydroxyoctadecanoyl-CoA	down_neg
milk_1421	Heparan sulfate degradation	2	2	Positive	up-regulated	0.0206705	1	1	E24,E23	C00618/C06472/C00191,C00618/C06472/C00191	3-Dehydro-L-gulonate/L-Iduronic acid/D-Glucuronate$3-Dehydro-L-gulonate/L-Iduronic acid/D-Glucuronate	up_pos
milk_1421	Hyaluronan Metabolism	2	2	Positive	up-regulated	0.0206705	1	1	E24,E23	C00618/C06472/C00191,C00618/C06472/C00191	3-Dehydro-L-gulonate/L-Iduronic acid/D-Glucuronate$3-Dehydro-L-gulonate/L-Iduronic acid/D-Glucuronate	up_pos
milk_1421	Leukotriene metabolism	6	13	Negative	up-regulated	0.00731031	0.461538	0.461538	E919,E851,E301,E853,E133,E669	CE6182,C00020/C00362,CE5348/CE5342/CE5970,C00020/C00362,CE6186,C00219	20-CoA-20-oxo-leukotriene B4$AMP/dGMP$5-oxo-12(R)-hydroxy-eicosa-8E,10E,14Z-trienoyl-CoA/5-oxo-12(S)-hydroxy-eicosa-8E,10E,14Z-trienoyl-CoA/5(S),12(R)-dihydroxy-eicosa-2,8-trans-6,14-cis-tetraenoyl-CoA$AMP/dGMP$18E-20-oxo-20-CoA-LTB4$arachidonic acid	up_neg
milk_1421	Omega-6 fatty acid metabolism	5	15	Negative	up-regulated	0.0471389	0.333333	0.333333	E261,E851,E221,E853,E669	CE1102/CE4790/C16335/CE5942,C00020/C00362,tethex3coa/CE4816/CE4838/CE4823,C00020/C00362,C00219	cis-(3S)-hydroxytetradec-7-enoyl-CoA/(3S)-3-hydroxy-cis-8-tetradecenoyl-CoA/OPC4-CoA/3-oxo-(2S,6R,10R)-trimethyl-hendecanoyl-CoA$AMP/dGMP$tetracosahexaenoyl coenzyme A/2-trans-9,12,15,18,21-all-cis-tetracosahexaenoyl-CoA/trans-2-all-cis-6,9,12,15,18-tetracosahexaenoyl-CoA/tetracosa-6,9,12,15,18,21-all-cis-hexaenoyl-CoA$AMP/dGMP$arachidonic acid	up_neg
milk_1421	Pentose and Glucuronate Interconversions	2	2	Positive	up-regulated	0.0206705	1	1	E24,E23	C00618/C06472/C00191,C00618/C06472/C00191	3-Dehydro-L-gulonate/L-Iduronic acid/D-Glucuronate$3-Dehydro-L-gulonate/L-Iduronic acid/D-Glucuronate	up_pos
milk_1421	Phosphatidylinositol phosphate metabolism	5	10	Positive	up-regulated	0.0229392	0.5	0.5	E66,E24,E1,E23,E2	C00055,C00618/C06472/C00191,C04549,C00618/C06472/C00191,C04549	CMP$3-Dehydro-L-gulonate/L-Iduronic acid/D-Glucuronate$1-Phosphatidyl-1D-myo-inositol 3-phosphate $3-Dehydro-L-gulonate/L-Iduronic acid/D-Glucuronate$1-Phosphatidyl-1D-myo-inositol 3-phosphate	up_pos
milk_1421	Porphyrin metabolism	4	8	Positive	up-regulated	0.0334426	0.5	0.5	E24,E23,E22,E21	C00618/C06472/C00191,C00618/C06472/C00191,C02670/C00072/glac,C02670/C00072/glac	3-Dehydro-L-gulonate/L-Iduronic acid/D-Glucuronate$3-Dehydro-L-gulonate/L-Iduronic acid/D-Glucuronate$D-glucurono-6,3-lactone/L-Ascorbate/D-glucurono-6,3-lactone$D-glucurono-6,3-lactone/L-Ascorbate/D-glucurono-6,3-lactone	up_pos
milk_1421	Propanoate metabolism	2	3	Positive	up-regulated	0.0491555	0.666667	0.666667	E14,E84	C04593,C00207/C00479	(2S,3R)-3-Hydroxybutane-1,2,3-tricarboxylate; Methylisocitrate; Methylisocitric acid$Acetone; Dimethyl ketone; 2-Propanone/	up_pos
milk_1421	Pyrimidine metabolism	11	41	Negative	up-regulated	0.0330224	0.268293	0.268293	E314,E770,E205,E468,E206,E139,E853,E390,E652,E530,E851	C00104,C00022/C00222,C00239,C01346,C00239,C00217/C00025/C05938,C00020/C00362,C00364,C00074,C00232/C06002/C00349/C00109/C00164,C00020/C00362	IDP$Pyruvate/3-Oxopropanoate; Malonate semialdehyde$dCMP$dUDP$dCMP$D-Glutamate; D-Glutamic acid; D-Glutaminic acid; D-2-Aminoglutaric acid/L-Glutamate/L-4-Hydroxyglutamate semialdehyde$AMP/dGMP$dTMP$Phosphoenolpyruvate$Succinate semialdehyde; Succinic semialdehyde; 4-Oxobutanoate/(S)-Methylmalonate semialdehyde/2-Methyl-3-oxopropanoate; 3-Oxo-2-methylpropanoate; Methylmalonate semialdehyde/2-Oxob…	up_neg
milk_1421	Squalene and cholesterol biosynthesis	6	19	Negative	up-regulated	0.0426015	0.315789	0.315789	E38,E760,E34,E33,E31,E530	C00418,C00341,C00418,C00418,C00418,C00232/C06002/C00349/C00109/C00164	(R)-Mevalonate$Geranyl diphosphate$(R)-Mevalonate$(R)-Mevalonate$(R)-Mevalonate$Succinate semialdehyde; Succinic semialdehyde; 4-Oxobutanoate/(S)-Methylmalonate semialdehyde/2-Methyl-3-oxopropanoate; 3-Oxo-2-methylpropanoate; Methylmalonate semialdehyde/2-Oxobutanoate/Acetoacetate	up_neg
milk_1421	Tyrosine metabolism	7	17	Positive	up-regulated	0.0292412	0.411765	0.411765	E60,E42,E22,E59,E87,E21,E6	C15522/thbpt4acam,C05838/C00811/C02763/C00166,C02670/C00072/glac,C00268/C02953/C04244,C05589/C00788,C02670/C00072/glac,C00272	Tetrahydrobiopterin-4a-carbinolamine/Tetrahydrobiopterin-4a-carbinolamine$cis-2-Hydroxycinnamate; 2-Coumarinate/4-Coumarate; p-Coumaric acid; trans-4-Hydroxycinnamate; trans-p-Hydroxycinnamate; 4-Hydroxycinnamic acid; 4-Hydroxycinnamate/enol-Phenylpyruvate/Phenylpyruvate$D-glucurono-6,3-lactone/L-Ascorbate/D-glucurono-6,3-lactone$6,7-Dihydrobiopterin/7,8-Dihydrobiopterin/6-Lactoyl-5,6,7,8-tetrahy…	up_pos
milk_1421	Vitamin B9 (folate) metabolism	2	3	Positive	up-regulated	0.0491555	0.666667	0.666667	E45,E140	C00440,C03838	5-Methyltetrahydrofolate$N1-(5-Phospho-D-ribosyl)glycinamide	up_pos
milk_pn12	Ascorbate (Vitamin C) and Aldarate Metabolism	3	5	Negative	down-regulated	0.0266364	0.6	-0.6	E3,E93,E1	C02670/C00072/glac,C02045,C02670/C00072/glac	D-glucurono-6,3-lactone/L-Ascorbate/D-glucurono-6,3-lactone$$D-glucurono-6,3-lactone/L-Ascorbate/D-glucurono-6,3-lactone	down_neg
milk_pn12	C5-Branched dibasic acid metabolism	2	3	Negative	down-regulated	0.0470549	0.666667	-0.666667	E8,E4	C00022/C00222,C00022/C00222	Pyruvate/3-Oxopropanoate; Malonate semialdehyde$Pyruvate/3-Oxopropanoate; Malonate semialdehyde	down_neg
milk_pn12	CoA Catabolism	2	2	Positive	up-regulated	0.0236955	1	1	E65,E66	C00864,C00864	(R)-Pantothenate$(R)-Pantothenate	up_pos
milk_pn12	D4&E4-neuroprostanes formation	2	3	Negative	down-regulated	0.0470549	0.666667	-0.666667	E3,E1	C02670/C00072/glac,C02670/C00072/glac	D-glucurono-6,3-lactone/L-Ascorbate/D-glucurono-6,3-lactone$D-glucurono-6,3-lactone/L-Ascorbate/D-glucurono-6,3-lactone	down_neg
milk_pn12	Glycerophospholipid metabolism	10	30	Negative	down-regulated	0.0401647	0.333333	-0.333333	E115,E68,E238,E8,E144,E133,E4,E14,E215,E11	C00307,C00346,C02737,C00022/C00222,C00116,C00031/C00221/C02336/C00267/C00962/C00795/C00137/C13747/C07480/C00984/C00159,C00022/C00222,C00258,C04756,C00258	CDPcholine$Ethanolamine phosphate$Phosphatidylserine$Pyruvate/3-Oxopropanoate; Malonate semialdehyde$Glycerol$D-Glucose/beta-D-Glucose/beta-D-Fructose; beta-Fruit sugar; beta-D-arabino-Hexulose; beta-Levulose; Fructose/alpha-D-Glucose/beta-D-Galactose/D-Tagatose; lyxo-Hexulose/myo-Inositol/1,7-Dimethylxanthine; Paraxanthine//alpha-D-Galactose/D-Mannose$Pyruvate/3-Oxopropanoate; Malonate semialdeh…	down_neg
milk_pn12	Glycine, serine, alanine and threonine metabolism	8	19	Negative	down-regulated	0.015713	0.421053	-0.421053	E8,E59,E4,E14,E16,E11,E121,E96	C00022/C00222,C01005,C00022/C00222,C00258,C00546/C00511/CE0737,C00258,C00232/C06002/C00349/C00109/C00164,C00937/C00424/C05235/C00163	Pyruvate/3-Oxopropanoate; Malonate semialdehyde$O-Phospho-L-serine$Pyruvate/3-Oxopropanoate; Malonate semialdehyde$(R)-Glycerate$Methylglyoxal/Propenoate; Acrylic acid; Acrylate; 2-Propenoic acid; Vinylformic acid/malonic dialdehyde$(R)-Glycerate$Succinate semialdehyde; Succinic semialdehyde; 4-Oxobutanoate/(S)-Methylmalonate semialdehyde/2-Methyl-3-oxopropanoate; 3-Oxo-2-methylpropanoate; Methyl…	down_neg
milk_pn12	Glyoxylate and Dicarboxylate Metabolism	3	5	Negative	down-regulated	0.0266364	0.6	-0.6	E35,E11,E14	C00259/C00309/C00312/C00310/C00121/C00181,C00258,C00258	L-Arabinose/D-Ribulose; D-erythro-2-Pentulose; D-Arabinoketose; D-Arabinulose; D-Riboketose/L-Xylulose/D-Xylulose/D-Ribose/D-Xylose$(R)-Glycerate$(R)-Glycerate	down_neg
milk_pn12	Histidine metabolism	2	4	Positive	down-regulated	0.00999916	0.5	-0.5	E21,E20	C00439,C03680	N-Formimidoyl-L-glutamate$4-Imidazolone-5-propanoate	down_pos
milk_pn12	Leukotriene metabolism	3	8	Negative	up-regulated	0.0426015	375	375	E142,E313,E77	CE6186,CE5947,CE6185	18E-20-oxo-20-CoA-LTB4$20-COOH-10,11-dihydro-LTB4$omega-carboxy-trinor-leukotriene B4	up_neg
milk_pn12	Porphyrin metabolism	3	5	Negative	down-regulated	0.0266364	0.6	-0.6	E204,E3,E1	C05791,C02670/C00072/glac,C02670/C00072/glac	D-Urobilinogen$D-glucurono-6,3-lactone/L-Ascorbate/D-glucurono-6,3-lactone$D-glucurono-6,3-lactone/L-Ascorbate/D-glucurono-6,3-lactone	down_neg
milk_pn12	Propanoate metabolism	4	9	Negative	down-regulated	0.0448702	0.444444	-0.444444	E8,E96,E4,E121	C00022/C00222,C00937/C00424/C05235/C00163,C00022/C00222,C00232/C06002/C00349/C00109/C00164	Pyruvate/3-Oxopropanoate; Malonate semialdehyde$(R)-Lactaldehyde; D-Lactaldehyde; D-2-Hydroxypropionaldehyde/(S)-Lactaldehyde; L-Lactaldehyde; L-2-Hydroxypropionaldehyde/Hydroxyacetone; Acetol; 1-Hydroxy-2-propanone; 2-Ketopropyl alcohol; Acetone alcohol; Pyruvinalcohol; Pyruvic alcohol; Methylketol/Propionate (n-C3:0)$Pyruvate/3-Oxopropanoate; Malonate semialdehyde$Succinate semialdehyde; Succin…	down_neg
milk_pn12	Purine metabolism	6	15	Negative	down-regulated	0.0353752	0.4	-0.4	E1,E99,E8,E4,E35,E3	C02670/C00072/glac,CE0074,C00022/C00222,C00022/C00222,C00259/C00309/C00312/C00310/C00121/C00181,C02670/C00072/glac	D-glucurono-6,3-lactone/L-Ascorbate/D-glucurono-6,3-lactone$alloxan$Pyruvate/3-Oxopropanoate; Malonate semialdehyde$Pyruvate/3-Oxopropanoate; Malonate semialdehyde$L-Arabinose/D-Ribulose; D-erythro-2-Pentulose; D-Arabinoketose; D-Arabinulose; D-Riboketose/L-Xylulose/D-Xylulose/D-Ribose/D-Xylose$D-glucurono-6,3-lactone/L-Ascorbate/D-glucurono-6,3-lactone	down_neg
milk_pn12	Pyruvate Metabolism	4	9	Negative	down-regulated	0.0448702	0.444444	-0.444444	E16,E8,E96,E4	C00546/C00511/CE0737,C00022/C00222,C00937/C00424/C05235/C00163,C00022/C00222	Methylglyoxal/Propenoate; Acrylic acid; Acrylate; 2-Propenoic acid; Vinylformic acid/malonic dialdehyde$Pyruvate/3-Oxopropanoate; Malonate semialdehyde$(R)-Lactaldehyde; D-Lactaldehyde; D-2-Hydroxypropionaldehyde/(S)-Lactaldehyde; L-Lactaldehyde; L-2-Hydroxypropionaldehyde/Hydroxyacetone; Acetol; 1-Hydroxy-2-propanone; 2-Ketopropyl alcohol; Acetone alcohol; Pyruvinalcohol; Pyruvic alcohol; Methyl…	down_neg
milk_pn12	Tyrosine metabolism	8	22	Negative	down-regulated	0.0353752	0.363636	-0.363636	E44,E123,E1,E8,E4,E106,E121,E3	nrpphrsf,C05577/C00544/C01161,C02670/C00072/glac,C00022/C00222,C00022/C00222,C06199,C00232/C06002/C00349/C00109/C00164,C02670/C00072/glac	Sulfate derivative of norepinephrine$3,4-Dihydroxymandelaldehyde/Homogentisate/3,4-Dihydroxyphenylacetate; 3,4-Dihydroxyphenylacetic acid; 3,4-Dihydroxyphenyl acetate; 3,4-Dihydroxyphenyl acetic acid; Homoprotocatechuate$D-glucurono-6,3-lactone/L-Ascorbate/D-glucurono-6,3-lactone$Pyruvate/3-Oxopropanoate; Malonate semialdehyde$Pyruvate/3-Oxopropanoate; Malonate semialdehyde$Hordenine; 4-[2-(Dimet…	down_neg
milk_pn12	Vitamin B5 - CoA biosynthesis from pantothenate	2	2	Positive	up-regulated	0.0236955	1	1	E65,E66	C00864,C00864	(R)-Pantothenate$(R)-Pantothenate	up_pos
milk_pn12	Vitamin B6 (pyridoxine) metabolism	2	2	Positive	up-regulated	0.0236955	1	1	E86,E85	C00250,C00250	Pyridoxal$Pyridoxal	up_pos
milk_pn12	Vitamin E metabolism	4	7	Positive	up-regulated	0.0321822	0.571429	0.571429	E38,E118,E61,E133	CE1926,C02477,CE7144,CE5021	gama-carboxyethyl-hydroxychroman$alpha-Tocopherol; Vitamin E$13'-hydroxy-alpha-tocotrienol$	up_pos
milk_pn34	Androgen and estrogen biosynthesis and metabolism	3	8	Negative	down-regulated	0.0457945	375	-375	E114,E116,E115	C11131,andrstrnglc/C11135/C11136/5adtststeroneglc/ahandrostanglc,andrstrnglc/C11135/C11136/5adtststeroneglc/ahandrostanglc	2-Methoxy-estradiol-17beta 3-glucuronide$androsterone glucuronide/androsterone glucuronide/Etiocholan-3alpha-ol-17-one 3-glucuronide/5alpha-Dihydrotestosterone glucuronide/Etiocholan-3alpha-ol-17-one 3-glucuronide$androsterone glucuronide/androsterone glucuronide/Etiocholan-3alpha-ol-17-one 3-glucuronide/5alpha-Dihydrotestosterone glucuronide/Etiocholan-3alpha-ol-17-one 3-glucuronide	down_neg
milk_pn34	Ascorbate (Vitamin C) and Aldarate Metabolism	18	78	Negative	up-regulated	0.00705823	0.230769	0.230769	E940,E305,E84,E939,E85,E311,E748,E570,E749,E1001,E754,E105,E300,E248,E742,E302,E29,E92	C00818,C00158/C04575/C00311,C02147,C00818,C02147,C00158/C04575/C00311,C02045,C05411,C02045,C01620,C02045,C02670/C00072/glac,C00158/C04575/C00311,C00725/C04593,C02045,C00158/C04575/C00311,C00425/C00417,C02670/C00072/glac	D-Glucarate$Citrate//Isocitrate$Dihydrolipoate; Dihydrolipoic acid; Dihydrothioctic acid$D-Glucarate$Dihydrolipoate; Dihydrolipoic acid; Dihydrothioctic acid$Citrate//Isocitrate$$$$$$D-glucurono-6,3-lactone/L-Ascorbate/D-glucurono-6,3-lactone$Citrate//Isocitrate$Lipoate; Lipoic acid; alpha-Lipoic acid; Thioctic acid/(2S,3R)-3-Hydroxybutane-1,2,3-tricarboxylate; Methylisocitrate; Methylisocitric a…	up_neg
milk_pn34	Ascorbate (Vitamin C) and Aldarate Metabolism	4	7	Positive	up-regulated	0.00235274	0.571429	0.571429	E11,E10,E12,E9	C00618/C06472/C00191,C02670/C00072/glac,C00618/C06472/C00191,C02670/C00072/glac	3-Dehydro-L-gulonate/L-Iduronic acid/D-Glucuronate$D-glucurono-6,3-lactone/L-Ascorbate/D-glucurono-6,3-lactone$3-Dehydro-L-gulonate/L-Iduronic acid/D-Glucuronate$D-glucurono-6,3-lactone/L-Ascorbate/D-glucurono-6,3-lactone	up_pos
milk_pn34	C21-steroid hormone biosynthesis and metabolism	3	7	Negative	down-regulated	0.0311739	0.428571	-0.428571	E169,E116,E115	CE2211/C05480,andrstrnglc/C11135/C11136/5adtststeroneglc/ahandrostanglc,andrstrnglc/C11135/C11136/5adtststeroneglc/ahandrostanglc	allopregnanolone/3alpha-Hydroxy-5beta-pregnane-20-one$androsterone glucuronide/androsterone glucuronide/Etiocholan-3alpha-ol-17-one 3-glucuronide/5alpha-Dihydrotestosterone glucuronide/Etiocholan-3alpha-ol-17-one 3-glucuronide$androsterone glucuronide/androsterone glucuronide/Etiocholan-3alpha-ol-17-one 3-glucuronide/5alpha-Dihydrotestosterone glucuronide/Etiocholan-3alpha-ol-17-one 3-glucuronide	down_neg
milk_pn34	Chondroitin sulfate degradation	2	3	Positive	up-regulated	0.0105033	0.666667	0.666667	E11,E12	C00618/C06472/C00191,C00618/C06472/C00191	3-Dehydro-L-gulonate/L-Iduronic acid/D-Glucuronate$3-Dehydro-L-gulonate/L-Iduronic acid/D-Glucuronate	up_pos
milk_pn34	CoA Catabolism	2	3	Positive	up-regulated	0.0105033	0.666667	0.666667	E57,E58	C00864,C00864	(R)-Pantothenate$(R)-Pantothenate	up_pos
milk_pn34	D4&E4-neuroprostanes formation	2	3	Positive	up-regulated	0.0105033	0.666667	0.666667	E10,E9	C02670/C00072/glac,C02670/C00072/glac	D-glucurono-6,3-lactone/L-Ascorbate/D-glucurono-6,3-lactone$D-glucurono-6,3-lactone/L-Ascorbate/D-glucurono-6,3-lactone	up_pos
milk_pn34	Fatty acid oxidation	2	3	Negative	up-regulated	0.0384001	0.666667	0.666667	E188,E36	vacccoa/C03035/C16162/od2coa/odecoa,arachcoa/CE5122/phytcoa	vaccenyl coenzyme A/gamma-linolenoyl-CoA/alpha-Linolenoyl-CoA/trans-Octadec-2-enoyl-CoA/Octadecenoyl-CoA (n-C18:1CoA)$arachidyl coenzyme A/3(S)-phytanoyl-CoA/phytanyl coa	up_neg
milk_pn34	Heparan sulfate degradation	2	5	Positive	up-regulated	0.0356273	0.4	0.4	E11,E12	C00618/C06472/C00191,C00618/C06472/C00191	3-Dehydro-L-gulonate/L-Iduronic acid/D-Glucuronate$3-Dehydro-L-gulonate/L-Iduronic acid/D-Glucuronate	up_pos
milk_pn34	Hyaluronan Metabolism	2	4	Positive	up-regulated	0.0202504	0.5	0.5	E11,E12	C00618/C06472/C00191,C00618/C06472/C00191	3-Dehydro-L-gulonate/L-Iduronic acid/D-Glucuronate$3-Dehydro-L-gulonate/L-Iduronic acid/D-Glucuronate	up_pos
milk_pn34	Keratan sulfate degradation	2	5	Positive	up-regulated	0.0356273	0.4	0.4	E86,E38	m2mn,C01019	(alpha-D-mannosyl)2-beta-D-mannosyl-N-acetylglucosamine$6-Deoxy-L-galactose; L-Fucose	up_pos
milk_pn34	Linoleate metabolism	4	12	Negative	down-regulated	0.0405848	0.333333	-0.333333	E52,E154,E113,E1	C00127,C14762/C14826/C14825,C08261,C01595	Oxidized glutathione$13(S)-HODE; (13S)-Hydroxyoctadecadienoic acid; (9Z, 11E)-(13S)-13-Hydroxyoctadeca-9,11-dienoic acid/12(13)-EpOME; (12R,13S)-(9Z)-12,13-Epoxyoctadecenoic acid/9(10)-EpOME; (9R,10S)-(12Z)-9,10-Epoxyoctadecenoic acid$$linoleic acid (all cis C18:2) n-6	down_neg
milk_pn34	N-Glycan Degradation	2	5	Positive	up-regulated	0.0356273	0.4	0.4	E86,E38	m2mn,C01019	(alpha-D-mannosyl)2-beta-D-mannosyl-N-acetylglucosamine$6-Deoxy-L-galactose; L-Fucose	up_pos
milk_pn34	Pentose and Glucuronate Interconversions	2	2	Positive	up-regulated	0.00386522	1	1	E11,E12	C00618/C06472/C00191,C00618/C06472/C00191	3-Dehydro-L-gulonate/L-Iduronic acid/D-Glucuronate$3-Dehydro-L-gulonate/L-Iduronic acid/D-Glucuronate	up_pos
milk_pn34	Porphyrin metabolism	4	5	Positive	up-regulated	0.000420133	0.8	0.8	E11,E10,E12,E9	C00618/C06472/C00191,C02670/C00072/glac,C00618/C06472/C00191,C02670/C00072/glac	3-Dehydro-L-gulonate/L-Iduronic acid/D-Glucuronate$D-glucurono-6,3-lactone/L-Ascorbate/D-glucurono-6,3-lactone$3-Dehydro-L-gulonate/L-Iduronic acid/D-Glucuronate$D-glucurono-6,3-lactone/L-Ascorbate/D-glucurono-6,3-lactone	up_pos
milk_pn34	Purine metabolism	4	12	Positive	up-regulated	0.0114276	0.333333	0.333333	E77,E10,E17,E9	C00559/C05198,C02670/C00072/glac,C16637/C00672/C00673,C02670/C00072/glac	Deoxyadenosine/5'-Deoxyadenosine$D-glucurono-6,3-lactone/L-Ascorbate/D-glucurono-6,3-lactone$5-Deoxyribose-1-phosphate; 5-Deoxy-alpha-D-ribose-1-phosphate/2-Deoxy-D-ribose 1-phosphate/2-Deoxy-D-ribose 5-phosphate$D-glucurono-6,3-lactone/L-Ascorbate/D-glucurono-6,3-lactone	up_pos
milk_pn34	Tyrosine metabolism	2	5	Positive	down-regulated	0.00731031	0.4	-0.4	E4,E2	CE1918/CE5629,C00015	5-hydroxytryptophol/1,2-dehydrosalsolinol$UDP	down_pos
milk_pn34	Tyrosine metabolism	4	15	Positive	up-regulated	0.0275607	0.266667	0.266667	E53,E10,E2,E9	C05589/C00788,C02670/C00072/glac,C00272,C02670/C00072/glac	L-Normetanephrine/L-Adrenaline; (R)-(-)-Adrenaline; (R)-(-)-Epinephrine; (R)-(-)-Epirenamine; (R)-(-)-Adnephrine; 4-[(1R)-1-Hydroxy-2-(methylamino)ethyl]-1,2-benzenediol$D-glucurono-6,3-lactone/L-Ascorbate/D-glucurono-6,3-lactone$Tetrahydrobiopterin$D-glucurono-6,3-lactone/L-Ascorbate/D-glucurono-6,3-lactone	up_pos
milk_pn34	Urea cycle/amino group metabolism	2	8	Positive	down-regulated	0.0341148	0.25	-0.25	E23,E30	C05805/C05313,C00559/C05198	2-Hexaprenyl-3-methyl-5-hydroxy-6-methoxy-1,4-benzoquinone/3-Hexaprenyl-4-hydroxy-5-methoxybenzoate$Deoxyadenosine/5'-Deoxyadenosine	down_pos
milk_pn34	Vitamin B5 - CoA biosynthesis from pantothenate	2	3	Positive	up-regulated	0.0105033	0.666667	0.666667	E57,E58	C00864,C00864	(R)-Pantothenate$(R)-Pantothenate	up_pos
vams_tri2	Arginine and Proline Metabolism	2	2	Positive	down-regulated	0.00142845	1	-1	E15,E7	C01165/C01157/C00430/C03440/C01110,CE4788/C00763/C00148	L-Glutamate 5-semialdehyde; L-Glutamate gamma-semialdehyde/trans-4-Hydroxy-L-proline/5-Aminolevulinate; 5-Amino-4-oxopentanoate; 5-Amino-4-oxovaleric acid/cis-4-Hydroxy-D-proline/5-Amino-2-oxopentanoic acid; 5-Amino-2-oxopentanoate; 2-Oxo-5-amino-pentanoate; 2-Oxo-5-aminopentanoate; alpha-Keto-delta-aminopentanoate; 2-Oxo-5-aminovalerate$acetamidopropanal/D-Proline/L-Proline	down_pos
vams_tri2	Aspartate and asparagine metabolism	2	2	Positive	down-regulated	0.00142845	1	-1	E15,E7	C01165/C01157/C00430/C03440/C01110,CE4788/C00763/C00148	L-Glutamate 5-semialdehyde; L-Glutamate gamma-semialdehyde/trans-4-Hydroxy-L-proline/5-Aminolevulinate; 5-Amino-4-oxopentanoate; 5-Amino-4-oxovaleric acid/cis-4-Hydroxy-D-proline/5-Amino-2-oxopentanoic acid; 5-Amino-2-oxopentanoate; 2-Oxo-5-amino-pentanoate; 2-Oxo-5-aminopentanoate; alpha-Keto-delta-aminopentanoate; 2-Oxo-5-aminovalerate$acetamidopropanal/D-Proline/L-Proline	down_pos
vams_tri2	Bile acid biosynthesis	2	4	Negative	up-regulated	0.00386522	0.5	0.5	E21,E22	CE2202/C17335,C04722	23S,25,26-trihydroxyvitamin D3/$3alpha,7alpha,12alpha-Trihydroxy-5beta-cholestanoate	up_neg
vams_tri2	Butanoate metabolism	2	3	Positive	up-regulated	0.00882279	0.666667	0.666667	E5,E6	C00719/C00431/C00183,C00719/C00431/C00183	Glycine betaine/5-Aminopentanoate; 5-Aminopentanoic acid; 5-Aminovaleric acid/L-Valine$Glycine betaine/5-Aminopentanoate; 5-Aminopentanoic acid; 5-Aminovaleric acid/L-Valine	up_pos
vams_tri2	Glycerophospholipid metabolism	2	3	Positive	up-regulated	0.00882279	0.666667	0.666667	E16,E20	C00570,C00031/C00221/C02336/C00267/C00962/C00795/C00137/C13747/C07480/C00984/C00159	CDPethanolamine$D-Glucose/beta-D-Glucose/beta-D-Fructose; beta-Fruit sugar; beta-D-arabino-Hexulose; beta-Levulose; Fructose/alpha-D-Glucose/beta-D-Galactose/D-Tagatose; lyxo-Hexulose/myo-Inositol/1,7-Dimethylxanthine; Paraxanthine//alpha-D-Galactose/D-Mannose	up_pos
vams_tri2	Glycine, serine, alanine and threonine metabolism	2	3	Positive	up-regulated	0.00882279	0.666667	0.666667	E5,E6	C00719/C00431/C00183,C00719/C00431/C00183	Glycine betaine/5-Aminopentanoate; 5-Aminopentanoic acid; 5-Aminovaleric acid/L-Valine$Glycine betaine/5-Aminopentanoate; 5-Aminopentanoic acid; 5-Aminovaleric acid/L-Valine	up_pos
vams_tri2	Histidine metabolism	2	2	Positive	down-regulated	0.00142845	1	-1	E2,E12	C05828,C00135	3-Methylimidazoleacetic acid$L-Histidine	down_pos
vams_tri2	Purine metabolism	2	6	Negative	down-regulated	0.0401647	0.333333	-0.333333	E51,E53	C00294,C00049/C00402	Inosine$L-Aspartate/D-Aspartate	down_neg
vams_tri2	Tryptophan metabolism	2	5	Negative	down-regulated	0.0311739	0.4	-0.4	E6,E7	C04409,C03722	2-Amino-3-carboxymuconate semialdehyde$Quinolinate	down_neg
vams_tri2	Urea cycle/amino group metabolism	2	2	Positive	down-regulated	0.00142845	1	-1	E15,E7	C01165/C01157/C00430/C03440/C01110,CE4788/C00763/C00148	L-Glutamate 5-semialdehyde; L-Glutamate gamma-semialdehyde/trans-4-Hydroxy-L-proline/5-Aminolevulinate; 5-Amino-4-oxopentanoate; 5-Amino-4-oxovaleric acid/cis-4-Hydroxy-D-proline/5-Amino-2-oxopentanoic acid; 5-Amino-2-oxopentanoate; 2-Oxo-5-amino-pentanoate; 2-Oxo-5-aminopentanoate; alpha-Keto-delta-aminopentanoate; 2-Oxo-5-aminovalerate$acetamidopropanal/D-Proline/L-Proline	down_pos
vams_tri2	Valine, leucine and isoleucine degradation	2	3	Positive	up-regulated	0.00882279	0.666667	0.666667	E5,E6	C00719/C00431/C00183,C00719/C00431/C00183	Glycine betaine/5-Aminopentanoate; 5-Aminopentanoic acid; 5-Aminovaleric acid/L-Valine$Glycine betaine/5-Aminopentanoate; 5-Aminopentanoic acid; 5-Aminovaleric acid/L-Valine	up_pos
vams_tri2	Vitamin B3 (nicotinate and nicotinamide) metabolism	2	3	Negative	down-regulated	0.00991513	0.666667	-0.666667	E7,E53	C03722,C00049/C00402	Quinolinate$L-Aspartate/D-Aspartate	down_neg
vams_tri3	Alanine and Aspartate Metabolism	1	2	Positive	down-regulated	0.0441139	0.5	-0.5	E2	C00049/C00402	L-Aspartate/D-Aspartate	down_pos
vams_tri3	Alanine and Aspartate Metabolism	1	1	Positive	up-regulated	0.0151248	1	1	E4	C01045/C01042	N-Formyl-L-glutamate/N-Acetyl-L-aspartate	up_pos
vams_tri3	Carbon fixation	1	1	Positive	down-regulated	0.0120998	1	-1	E2	C00049/C00402	L-Aspartate/D-Aspartate	down_pos
vams_tri3	Carnitine shuttle	2	4	Negative	down-regulated	0.0128561	0.5	-0.5	E57,E42	hexccrn,CE4815/CE2437/strdnccoa	hexacosanoyl carnitine$stearidonoyl-CoA/2E,6Z,9Z,12Z-octadecatetraenoyl-CoA/stearidonyl coenzyme A	down_neg
vams_tri3	Carnitine shuttle	1	1	Positive	down-regulated	0.0120998	1	-1	E7	dcsptn1crn/clpndcrn	docosa-4,7,10,13,16-pentaenoyl carnitine/clupanodonyl carnitine	down_pos
vams_tri3	CoA Catabolism	1	1	Negative	up-regulated	0.0398286	1	1	E5	C00864	(R)-Pantothenate	up_neg
vams_tri3	Drug metabolism - cytochrome P450	1	1	Positive	up-regulated	0.0151248	1	1	E5	C16586/CE2173	2-Phenyl-1,3-propanediol monocarbamate/	up_pos
vams_tri3	Fatty acid activation	1	1	Negative	up-regulated	0.0398286	1	1	E16	C06426/C06427	(6Z,9Z,12Z)-Octadecatrienoic acid; 6,9,12-Octadecatrienoic acid; gamma-Linolenic acid; Gamolenic acid/(9Z,12Z,15Z)-Octadecatrienoic acid; alpha-Linolenic acid; 9,12,15-Octadecatrienoic acid; Linolenate; alpha-Linolenate	up_neg
vams_tri3	Fatty acid oxidation, peroxisome	1	1	Negative	down-regulated	0.0299975	1	-1	E42	CE4815/CE2437/strdnccoa	stearidonoyl-CoA/2E,6Z,9Z,12Z-octadecatetraenoyl-CoA/stearidonyl coenzyme A	down_neg
vams_tri3	Nitrogen metabolism	1	1	Positive	down-regulated	0.0120998	1	-1	E2	C00049/C00402	L-Aspartate/D-Aspartate	down_pos
vams_tri3	Omega-3 fatty acid metabolism	1	1	Negative	down-regulated	0.0299975	1	-1	E42	CE4815/CE2437/strdnccoa	stearidonoyl-CoA/2E,6Z,9Z,12Z-octadecatetraenoyl-CoA/stearidonyl coenzyme A	down_neg
vams_tri3	Omega-3 fatty acid metabolism	1	1	Negative	up-regulated	0.0398286	1	1	E16	C06426/C06427	(6Z,9Z,12Z)-Octadecatrienoic acid; 6,9,12-Octadecatrienoic acid; gamma-Linolenic acid; Gamolenic acid/(9Z,12Z,15Z)-Octadecatrienoic acid; alpha-Linolenic acid; 9,12,15-Octadecatrienoic acid; Linolenate; alpha-Linolenate	up_neg
vams_tri3	Pentose phosphate pathway	3	5	Negative	down-regulated	0.00193261	0.6	-0.6	E23,E6,E10	C00031/C00221/C02336/C00267/C00962/C00795/C00137/C13747/C07480/C00984/C00159,C00259/C00309/C00312/C00310/C00121/C00181,C02076	D-Glucose/beta-D-Glucose/beta-D-Fructose; beta-Fruit sugar; beta-D-arabino-Hexulose; beta-Levulose; Fructose/alpha-D-Glucose/beta-D-Galactose/D-Tagatose; lyxo-Hexulose/myo-Inositol/1,7-Dimethylxanthine; Paraxanthine//alpha-D-Galactose/D-Mannose$L-Arabinose/D-Ribulose; D-erythro-2-Pentulose; D-Arabinoketose; D-Arabinulose; D-Riboketose/L-Xylulose/D-Xylulose/D-Ribose/D-Xylose$sedoheptulose	down_neg
vams_tri3	Pyrimidine metabolism	1	2	Positive	down-regulated	0.0441139	0.5	-0.5	E2	C00049/C00402	L-Aspartate/D-Aspartate	down_pos
vams_tri3	Pyrimidine metabolism	1	1	Positive	up-regulated	0.0151248	1	1	E10	C05711/C00475	gamma-Glutamyl-beta-cyanoalanine/Cytidine	up_pos
vams_tri3	Sialic acid metabolism	2	6	Negative	down-regulated	0.0424334	0.333333	-0.333333	E23,E56	C00031/C00221/C02336/C00267/C00962/C00795/C00137/C13747/C07480/C00984/C00159,C02737	D-Glucose/beta-D-Glucose/beta-D-Fructose; beta-Fruit sugar; beta-D-arabino-Hexulose; beta-Levulose; Fructose/alpha-D-Glucose/beta-D-Galactose/D-Tagatose; lyxo-Hexulose/myo-Inositol/1,7-Dimethylxanthine; Paraxanthine//alpha-D-Galactose/D-Mannose$Phosphatidylserine	down_neg
vams_tri3	Tryptophan metabolism	1	1	Positive	up-regulated	0.0151248	1	1	E6	CE1918/CE5629	5-hydroxytryptophol/1,2-dehydrosalsolinol	up_pos
vams_tri3	Tyrosine metabolism	2	3	Positive	up-regulated	0.0107554	0.666667	0.666667	E5,E6	C16586/CE2173,CE1918/CE5629	2-Phenyl-1,3-propanediol monocarbamate/$5-hydroxytryptophol/1,2-dehydrosalsolinol	up_pos
vams_tri3	Valine, leucine and isoleucine degradation	1	1	Negative	down-regulated	0.0299975	1	-1	E40	C00123/C00407	L-Leucine/L-Isoleucine	down_neg
vams_tri3	Vitamin B3 (nicotinate and nicotinamide) metabolism	1	2	Positive	down-regulated	0.0441139	0.5	-0.5	E2	C00049/C00402	L-Aspartate/D-Aspartate	down_pos
vams_tri3	Vitamin B5 - CoA biosynthesis from pantothenate	1	1	Negative	up-regulated	0.0398286	1	1	E5	C00864	(R)-Pantothenate	up_neg
vams_tri3	Vitamin B9 (folate) metabolism	1	1	Positive	up-regulated	0.0151248	1	1	E4	C01045/C01042	N-Formyl-L-glutamate/N-Acetyl-L-aspartate	up_pos
vams_pn56	Arachidonic acid metabolism	3	5	Negative	up-regulated	0.0130241	0.6	0.6	E86,E55,E61	C00127,C06426/C06427,C00020/C00362	Oxidized glutathione$(6Z,9Z,12Z)-Octadecatrienoic acid; 6,9,12-Octadecatrienoic acid; gamma-Linolenic acid; Gamolenic acid/(9Z,12Z,15Z)-Octadecatrienoic acid; alpha-Linolenic acid; 9,12,15-Octadecatrienoic acid; Linolenate; alpha-Linolenate$AMP/dGMP	up_neg
vams_pn56	Arginine and Proline Metabolism	4	7	Negative	down-regulated	0.0319301	0.571429	-0.571429	E2,E9,E8,E14	C03564,C01165/C01157/C00430/C03440/C01110,C01165/C01157/C00430/C03440/C01110,C00026	1-Pyrroline-2-carboxylate; 1-Pyrroline-2-carboxylic acid; delta1-Pyrroline 2-carboxylate$L-Glutamate 5-semialdehyde; L-Glutamate gamma-semialdehyde/trans-4-Hydroxy-L-proline/5-Aminolevulinate; 5-Amino-4-oxopentanoate; 5-Amino-4-oxovaleric acid/cis-4-Hydroxy-D-proline/5-Amino-2-oxopentanoic acid; 5-Amino-2-oxopentanoate; 2-Oxo-5-amino-pentanoate; 2-Oxo-5-aminopentanoate; alpha-Keto-delta-aminopent…	down_neg
vams_pn56	Ascorbate (Vitamin C) and Aldarate Metabolism	6	8	Negative	up-regulated	0.00025208	0.75	0.75	E22,E40,E95,E69,E86,E18	C02670/C00072/glac,C00158/C04575/C00311,C01620/C00262,CE7122,C00127,C05411	D-glucurono-6,3-lactone/L-Ascorbate/D-glucurono-6,3-lactone$Citrate//Isocitrate$/Hypoxanthine$$Oxidized glutathione$	up_neg
vams_pn56	Aspartate and asparagine metabolism	5	21	Positive	down-regulated	0.0263843	0.238095	-0.238095	E52,E47,E6,E40,E15	C05829,CE1939/CE1940,C02714,C01029/C00612,C02630/C01087/C03196/C02266	$spermidine monoaldehyde 1/spermidine monoaldehyde 2$N-Acetylputrescine$/N1-Acetylspermidine$(S)-2-Hydroxyglutarate/(R)-2-Hydroxyglutarate/(S)-2-Hydroxyglutarate/	down_pos
vams_pn56	Aspartate and asparagine metabolism	6	10	Negative	up-regulated	0.000756239	0.6	0.6	E7,E15,E11,E61,E14,E86	C05984/C01089/C03197/C06001/C00989,C02630/C01087/C03196/C02266,C01127/C05946,C00020/C00362,C00232/C06002/C00349/C00109/C00164,C00127	2-Hydroxybutyrate/(R)-3-Hydroxybutanoate; (R)-3-Hydroxybutanoic acid; (R)-3-Hydroxybutyric acid/(S)-3-Hydroxybutanoate/(S)-3-Hydroxyisobutyrate/4-Hydroxybutanoic acid; 4-Hydroxybutanoate; 4-Hydroxybutyric acid$(S)-2-Hydroxyglutarate/(R)-2-Hydroxyglutarate/(S)-2-Hydroxyglutarate/$4-Hydroxy-2-oxoglutarate; 4-Hydroxy-2-oxoglutaric acid/4-Hydroxy-2-oxoglutarate$AMP/dGMP$Succinate semialdehyde; Succin…	up_neg
vams_pn56	Butanoate metabolism	3	5	Negative	up-regulated	0.0130241	0.6	0.6	E7,E14,E61	C05984/C01089/C03197/C06001/C00989,C00232/C06002/C00349/C00109/C00164,C00020/C00362	2-Hydroxybutyrate/(R)-3-Hydroxybutanoate; (R)-3-Hydroxybutanoic acid; (R)-3-Hydroxybutyric acid/(S)-3-Hydroxybutanoate/(S)-3-Hydroxyisobutyrate/4-Hydroxybutanoic acid; 4-Hydroxybutanoate; 4-Hydroxybutyric acid$Succinate semialdehyde; Succinic semialdehyde; 4-Oxobutanoate/(S)-Methylmalonate semialdehyde/2-Methyl-3-oxopropanoate; 3-Oxo-2-methylpropanoate; Methylmalonate semialdehyde/2-Oxobutanoate/…	up_neg
vams_pn56	Dimethyl-branched-chain fatty acid mitochondrial beta-oxidation	2	4	Positive	down-regulated	0.0210907	0.5	-0.5	E212,E210	CE4801,CE4806	3(S)-hydroxy-4(R),8-dimethyl-nonanoyl-CoA$4(R),8-dimethyl-trans-2-nonenoyl-CoA	down_pos
vams_pn56	Fatty acid activation	3	5	Negative	up-regulated	0.0130241	0.6	0.6	E55,E49,E61	C06426/C06427,strdnc,C00020/C00362	(6Z,9Z,12Z)-Octadecatrienoic acid; 6,9,12-Octadecatrienoic acid; gamma-Linolenic acid; Gamolenic acid/(9Z,12Z,15Z)-Octadecatrienoic acid; alpha-Linolenic acid; 9,12,15-Octadecatrienoic acid; Linolenate; alpha-Linolenate$stearidonic acid C18:4, n-3$AMP/dGMP	up_neg
vams_pn56	Fatty acid oxidation	1	1	Positive	down-regulated	0.0401647	1	-1	E213	dmhptcoa	2,6 dimethylheptanoyl-CoA	down_pos
vams_pn56	Galactose metabolism	4	8	Negative	down-regulated	0.0493236	0.5	-0.5	E137,E29,E234,E32	C00063,C01040/C05394/C00198,C05399,C00031/C00221/C02336/C00267/C00962/C00795/C00137/C00984/C00159	CTP$L-Gulono-1,4-lactone; L-Gulono-gamma-lactone; gamma-Gulonolactone; L-Gulonic acid gamma-lactone; L-Gulonolactone/3-Keto-beta-D-galactose/D-Glucono-1,5-lactone; Gluconic lactone; Gluconic acid lactone; 1,5-Gluconolactone; delta-Gluconolactone; D-Gluconolactone; Gluconolactone$Melibiitol; 6-O-alpha-D-Galactosyl-D-glucitol$D-Glucose/beta-D-Glucose/beta-D-Fructose; beta-Fruit sugar; beta-D-arabin…	down_neg
vams_pn56	Linoleate metabolism	4	7	Negative	up-regulated	0.0078985	0.571429	0.571429	E86,E55,E22,E54	C00127,C06426/C06427,C02670/C00072/glac,C14762/C14826/C14825	Oxidized glutathione$(6Z,9Z,12Z)-Octadecatrienoic acid; 6,9,12-Octadecatrienoic acid; gamma-Linolenic acid; Gamolenic acid/(9Z,12Z,15Z)-Octadecatrienoic acid; alpha-Linolenic acid; 9,12,15-Octadecatrienoic acid; Linolenate; alpha-Linolenate$D-glucurono-6,3-lactone/L-Ascorbate/D-glucurono-6,3-lactone$13(S)-HODE; (13S)-Hydroxyoctadecadienoic acid; (9Z, 11E)-(13S)-13-Hydroxyoctadeca-9,11-dienoic aci…	up_neg
vams_pn56	Methionine and cysteine metabolism	2	5	Positive	down-regulated	0.0369717	0.4	-0.4	E24,E60	C00073,C00491	L-Methionine$L-Cystine; L-Dicysteine; L-alpha-Diamino-beta-dithiolactic acid	down_pos
vams_pn56	Methionine and cysteine metabolism	4	6	Negative	up-regulated	0.00327704	0.666667	0.666667	E86,E14,E8,E61	C00127,C00232/C06002/C00349/C00109/C00164,C00245,C00020/C00362	Oxidized glutathione$Succinate semialdehyde; Succinic semialdehyde; 4-Oxobutanoate/(S)-Methylmalonate semialdehyde/2-Methyl-3-oxopropanoate; 3-Oxo-2-methylpropanoate; Methylmalonate semialdehyde/2-Oxobutanoate/Acetoacetate$Taurine$AMP/dGMP	up_neg
vams_pn56	Omega-3 fatty acid metabolism	2	2	Negative	up-regulated	0.00840266	1	1	E55,E61	C06426/C06427,C00020/C00362	(6Z,9Z,12Z)-Octadecatrienoic acid; 6,9,12-Octadecatrienoic acid; gamma-Linolenic acid; Gamolenic acid/(9Z,12Z,15Z)-Octadecatrienoic acid; alpha-Linolenic acid; 9,12,15-Octadecatrienoic acid; Linolenate; alpha-Linolenate$AMP/dGMP	up_neg
vams_pn56	Omega-3 fatty acid metabolism	2	2	Positive	up-regulated	0.0111755	1	1	E94,E192	C16300,C06426/C06427	Stearidonic acid; 6,9,12,15-Octadecatetraenoic acid; (6Z,9Z,12Z,15Z)-Octadecatetraenoic acid$(6Z,9Z,12Z)-Octadecatrienoic acid; 6,9,12-Octadecatrienoic acid; gamma-Linolenic acid; Gamolenic acid/(9Z,12Z,15Z)-Octadecatrienoic acid; alpha-Linolenic acid; 9,12,15-Octadecatrienoic acid; Linolenate; alpha-Linolenate	up_pos
vams_pn56	Porphyrin metabolism	6	7	Negative	down-regulated	0.000588186	0.857143	-0.857143	E9,E5,E239,E64,E109,E8	C01165/C01157/C00430/C03440/C01110,C00931,C05791,C00425/C00417,C00032,C01165/C01157/C00430/C03440/C01110	L-Glutamate 5-semialdehyde; L-Glutamate gamma-semialdehyde/trans-4-Hydroxy-L-proline/5-Aminolevulinate; 5-Amino-4-oxopentanoate; 5-Amino-4-oxovaleric acid/cis-4-Hydroxy-D-proline/5-Amino-2-oxopentanoic acid; 5-Amino-2-oxopentanoate; 2-Oxo-5-amino-pentanoate; 2-Oxo-5-aminopentanoate; alpha-Keto-delta-aminopentanoate; 2-Oxo-5-aminovalerate$Porphobilinogen$D-Urobilinogen$Dehydroascorbate/cis-Aconita…	down_neg
vams_pn56	Propanoate metabolism	3	3	Negative	up-regulated	0.000924292	1	1	E7,E14,E61	C05984/C01089/C03197/C06001/C00989,C00232/C06002/C00349/C00109/C00164,C00020/C00362	2-Hydroxybutyrate/(R)-3-Hydroxybutanoate; (R)-3-Hydroxybutanoic acid; (R)-3-Hydroxybutyric acid/(S)-3-Hydroxybutanoate/(S)-3-Hydroxyisobutyrate/4-Hydroxybutanoic acid; 4-Hydroxybutanoate; 4-Hydroxybutyric acid$Succinate semialdehyde; Succinic semialdehyde; 4-Oxobutanoate/(S)-Methylmalonate semialdehyde/2-Methyl-3-oxopropanoate; 3-Oxo-2-methylpropanoate; Methylmalonate semialdehyde/2-Oxobutanoate/…	up_neg
vams_pn56	Tyrosine metabolism	6	16	Negative	up-regulated	0.0266364	375	375	E42,E22,E61,E14,E33,E86	C05576,C02670/C00072/glac,C00020/C00362,C00232/C06002/C00349/C00109/C00164,C01036/C01061,C00127	3,4-Dihydroxyphenylethyleneglycol$D-glucurono-6,3-lactone/L-Ascorbate/D-glucurono-6,3-lactone$AMP/dGMP$Succinate semialdehyde; Succinic semialdehyde; 4-Oxobutanoate/(S)-Methylmalonate semialdehyde/2-Methyl-3-oxopropanoate; 3-Oxo-2-methylpropanoate; Methylmalonate semialdehyde/2-Oxobutanoate/Acetoacetate$4-Maleylacetoacetate/4-Fumarylacetoacetate$Oxidized glutathione	up_neg
vams_pn56	Tyrosine metabolism	9	20	Positive	up-regulated	0.00504159	0.45	0.45	E36,E2,E23,E86,E3,E4,E24,E171,E26	C02442/C03711,C05584,C04043/C00642/C05852,C04148/C05642,C05584,C05584,C05576,CE2886/CE2887,C05350/C01197/C01179	N-Methyltyramine/N-Methylphenylethanolamine$3-Methoxy-4-hydroxymandelate; Vanillylmandelic acid$3,4-Dihydroxyphenylacetaldehyde; Protocatechuatealdehyde/4-Hydroxyphenylacetate/2-Hydroxyphenylacetate$alpha-N-Phenylacetyl-L-glutamine/Formyl-N-acetyl-5-methoxykynurenamine$3-Methoxy-4-hydroxymandelate; Vanillylmandelic acid$3-Methoxy-4-hydroxymandelate; Vanillylmandelic acid$3,4-Dihydroxyphenylethyle…	up_pos
vams_pn56	Valine, leucine and isoleucine degradation	4	8	Negative	up-regulated	0.0148727	0.5	0.5	E7,E14,E61,E75	C05984/C01089/C03197/C06001/C00989,C00232/C06002/C00349/C00109/C00164,C00020/C00362,C15976	2-Hydroxybutyrate/(R)-3-Hydroxybutanoate; (R)-3-Hydroxybutanoic acid; (R)-3-Hydroxybutyric acid/(S)-3-Hydroxybutanoate/(S)-3-Hydroxyisobutyrate/4-Hydroxybutanoic acid; 4-Hydroxybutanoate; 4-Hydroxybutyric acid$Succinate semialdehyde; Succinic semialdehyde; 4-Oxobutanoate/(S)-Methylmalonate semialdehyde/2-Methyl-3-oxopropanoate; 3-Oxo-2-methylpropanoate; Methylmalonate semialdehyde/2-Oxobutanoate/…	up_neg
vams_pn56	Vitamin B1 (thiamin) metabolism	3	4	Negative	down-regulated	0.0226031	0.75	-0.75	E84,E27,E14	C01136/C16255,C00322,C00026	S-Acetyldihydrolipoamide; 6-S-Acetyldihydrolipoamide/[Dihydrolipoyllysine-residue acetyltransferase] S-acetyldihydrolipoyllysine; S-Acetyldihydrolipoamide-E$2-Oxoadipate$2-Oxoglutarate	down_neg
vams_pn56	Vitamin D3 (cholecalciferol) metabolism	2	2	Positive	up-regulated	0.0111755	1	1	E160,E161	CE2204,CE2207	25-hydroxyvitamin D3-26,23-lactone$24-oxo-1alpha,23,25-trihydroxyvitamin D3	up_pos
fecal_tri3	3-oxo-10R-octadecatrienoate beta-oxidation	2	3	Positive	up-regulated	0.0426015	0.666667	0.666667	E76,E70	CE5311/CE5323,CE5310/CE5322	6(R)-hydroxy-tetradeca-2E,4E,8Z-trienoate/6(S)-hydroxy-tetradeca-2E,4E,8Z-trienoate$4(R)-hydroxy-dodec-6Z-enoate/4(S)-hydroxy-dodec-6Z-enoate	up_pos
fecal_tri3	Ascorbate (Vitamin C) and Aldarate Metabolism	2	2	Positive	down-regulated	0.00310898	1	-1	E17,E16	C02670/C00072/glac,C01620/C00262	D-glucurono-6,3-lactone/L-Ascorbate/D-glucurono-6,3-lactone$/Hypoxanthine	down_pos
fecal_tri3	CoA Catabolism	1	1	Positive	down-regulated	0.0288211	1	-1	E34	C00864	(R)-Pantothenate	down_pos
fecal_tri3	D4&E4-neuroprostanes formation	1	1	Positive	down-regulated	0.0288211	1	-1	E17	C02670/C00072/glac	D-glucurono-6,3-lactone/L-Ascorbate/D-glucurono-6,3-lactone	down_pos
fecal_tri3	Glycerophospholipid metabolism	2	5	Positive	down-regulated	0.028485	0.4	-0.4	E3,E55	C00189,C00836	Ethanolamine$Sphinganine	down_pos
fecal_tri3	Glycosphingolipid metabolism	1	1	Positive	down-regulated	0.0288211	1	-1	E55	C00836	Sphinganine	down_pos
fecal_tri3	Prostaglandin formation from arachidonate	2	6	Positive	down-regulated	0.041089	0.333333	-0.333333	E17,E3	C02670/C00072/glac,C00189	D-glucurono-6,3-lactone/L-Ascorbate/D-glucurono-6,3-lactone$Ethanolamine	down_pos
fecal_tri3	Tryptophan metabolism	2	4	Positive	down-regulated	0.0135283	0.5	-0.5	E41,E29	CE5860,C00637	$Indole-3-acetaldehyde	down_pos
fecal_tri3	Vitamin B5 - CoA biosynthesis from pantothenate	1	1	Positive	down-regulated	0.0288211	1	-1	E34	C00864	(R)-Pantothenate	down_pos
fecal_tri3	Vitamin E metabolism	2	2	Positive	up-regulated	0.0152928	1	1	E75,E2	CE1925,C00601	3'-carboxy-alpha-chromanol$Phenylacetaldehyde; alpha-Tolualdehyde	up_pos
infant_birth	Alanine and Aspartate Metabolism	1	2	Negative	down-regulated	0.0219309	0.5	-0.5	E8	C01045/C01042	N-Formyl-L-glutamate/N-Acetyl-L-aspartate	down_neg
infant_birth	Alanine and Aspartate Metabolism	1	1	Positive	down-regulated	0.000672212	1	-1	E2	C00026	2-Oxoglutarate	down_pos
infant_birth	Arginine and Proline Metabolism	1	1	Positive	down-regulated	0.000672212	1	-1	E2	C00026	2-Oxoglutarate	down_pos
infant_birth	Ascorbate (Vitamin C) and Aldarate Metabolism	1	1	Positive	up-regulated	0.0100832	1	1	E4	C00601	Phenylacetaldehyde; alpha-Tolualdehyde	up_pos
infant_birth	Aspartate and asparagine metabolism	1	2	Positive	down-regulated	0.00436938	0.5	-0.5	E2	C00026	2-Oxoglutarate	down_pos
infant_birth	Beta-Alanine metabolism	1	1	Positive	down-regulated	0.000672212	1	-1	E2	C00026	2-Oxoglutarate	down_pos
infant_birth	Butanoate metabolism	1	1	Positive	down-regulated	0.000672212	1	-1	E2	C00026	2-Oxoglutarate	down_pos
infant_birth	Carnitine shuttle	1	1	Negative	down-regulated	0.0178977	1	-1	E20	CE4842/dlnlcgcoa/C16165	trans,cis,cis-2,11,14-eicosatrienoyl-CoA/dihomo-gamma-linolenyl coenzyme A/timnodonyl coenzyme A	down_neg
infant_birth	CoA Catabolism	1	2	Positive	up-regulated	0.0200823	0.5	0.5	E17	C00864	(R)-Pantothenate	up_pos
infant_birth	De novo fatty acid biosynthesis	1	1	Negative	down-regulated	0.0178977	1	-1	E20	CE4842/dlnlcgcoa/C16165	trans,cis,cis-2,11,14-eicosatrienoyl-CoA/dihomo-gamma-linolenyl coenzyme A/timnodonyl coenzyme A	down_neg
infant_birth	Fatty acid activation	1	2	Negative	down-regulated	0.0219309	0.5	-0.5	E20	CE4842/dlnlcgcoa/C16165	trans,cis,cis-2,11,14-eicosatrienoyl-CoA/dihomo-gamma-linolenyl coenzyme A/timnodonyl coenzyme A	down_neg
infant_birth	Fatty acid oxidation	1	1	Negative	down-regulated	0.0178977	1	-1	E20	CE4842/dlnlcgcoa/C16165	trans,cis,cis-2,11,14-eicosatrienoyl-CoA/dihomo-gamma-linolenyl coenzyme A/timnodonyl coenzyme A	down_neg
infant_birth	Fatty acid oxidation, peroxisome	1	1	Positive	down-regulated	0.000672212	1	-1	E2	C00026	2-Oxoglutarate	down_pos
infant_birth	Glutamate metabolism	1	1	Positive	down-regulated	0.000672212	1	-1	E2	C00026	2-Oxoglutarate	down_pos
infant_birth	Glycerophospholipid metabolism	1	3	Negative	down-regulated	0.0236115	0.333333	-0.333333	E14	C00570	CDPethanolamine	down_neg
infant_birth	Glycine, serine, alanine and threonine metabolism	1	2	Positive	down-regulated	0.00436938	0.5	-0.5	E2	C00026	2-Oxoglutarate	down_pos
infant_birth	Glycosphingolipid metabolism	1	1	Negative	up-regulated	0.00966305	1	1	E14	C02744	Psychosine sulfate	up_neg
infant_birth	Histidine metabolism	1	1	Positive	down-regulated	0.000672212	1	-1	E2	C00026	2-Oxoglutarate	down_pos
infant_birth	Histidine metabolism	2	2	Negative	up-regulated	0.000756239	1	1	E1,E2	C03680,C00439	4-Imidazolone-5-propanoate$N-Formimidoyl-L-glutamate	up_neg
infant_birth	Linoleate metabolism	1	4	Negative	up-regulated	0.0275607	0.25	0.25	E8	C04717/C14827	(9Z,11E)-(13S)-13-Hydroperoxyoctadeca-9,11-dienoic acid; (9Z,11E)-(13S)-13-Hydroperoxyoctadeca-9,11-dienoate; 13(S)-HPODE; 13S-Hydroperoxy-9Z,11E-octadecadienoic acid/9(S)-HPODE; 9(S)-HPOD; (10E,12Z)-(9S)-9-Hydroperoxyoctadeca-10,12-dienoic acid	up_neg
infant_birth	Lysine metabolism	1	1	Positive	down-regulated	0.000672212	1	-1	E2	C00026	2-Oxoglutarate	down_pos
infant_birth	Methionine and cysteine metabolism	1	1	Positive	down-regulated	0.000672212	1	-1	E2	C00026	2-Oxoglutarate	down_pos
infant_birth	Omega-6 fatty acid metabolism	1	1	Negative	down-regulated	0.0178977	1	-1	E20	CE4842/dlnlcgcoa/C16165	trans,cis,cis-2,11,14-eicosatrienoyl-CoA/dihomo-gamma-linolenyl coenzyme A/timnodonyl coenzyme A	down_neg
infant_birth	Phytanic acid peroxisomal oxidation	1	1	Positive	down-regulated	0.000672212	1	-1	E2	C00026	2-Oxoglutarate	down_pos
infant_birth	Purine metabolism	1	7	Negative	down-regulated	0.025376	0.142857	-0.142857	E5	C06196	2'-Deoxyinosine 5'-phosphate; dIMP	down_neg
infant_birth	Purine metabolism	2	3	Positive	up-regulated	0.00193261	0.666667	0.666667	E20,E8	C03373,C00366	5-amino-1-(5-phospho-D-ribosyl)imidazole$Urate	up_pos
infant_birth	TCA cycle	1	1	Positive	down-regulated	0.000672212	1	-1	E2	C00026	2-Oxoglutarate	down_pos
infant_birth	Tryptophan metabolism	1	2	Positive	down-regulated	0.00436938	0.5	-0.5	E2	C00026	2-Oxoglutarate	down_pos
infant_birth	Tyrosine metabolism	1	3	Negative	down-regulated	0.0236115	0.333333	-0.333333	E1	C05580	3,4-Dihydroxymandelate	down_neg
infant_birth	Tyrosine metabolism	1	3	Positive	down-regulated	0.0117637	0.333333	-0.333333	E2	C00026	2-Oxoglutarate	down_pos
infant_birth	Tyrosine metabolism	1	4	Positive	up-regulated	0.0278968	0.25	0.25	E4	C00601	Phenylacetaldehyde; alpha-Tolualdehyde	up_pos
infant_birth	Urea cycle/amino group metabolism	1	1	Positive	down-regulated	0.000672212	1	-1	E2	C00026	2-Oxoglutarate	down_pos
infant_birth	Valine, leucine and isoleucine degradation	1	1	Positive	down-regulated	0.000672212	1	-1	E2	C00026	2-Oxoglutarate	down_pos
infant_birth	Vitamin B1 (thiamin) metabolism	1	1	Positive	down-regulated	0.000672212	1	-1	E2	C00026	2-Oxoglutarate	down_pos
infant_birth	Vitamin B5 - CoA biosynthesis from pantothenate	1	2	Positive	up-regulated	0.0200823	0.5	0.5	E17	C00864	(R)-Pantothenate	up_pos
infant_birth	Vitamin B9 (folate) metabolism	1	3	Negative	down-regulated	0.0236115	0.333333	-0.333333	E8	C01045/C01042	N-Formyl-L-glutamate/N-Acetyl-L-aspartate	down_neg
infant_birth	Vitamin E metabolism	1	1	Positive	up-regulated	0.0100832	1	1	E4	C00601	Phenylacetaldehyde; alpha-Tolualdehyde	up_pos
infant_pn12	3-oxo-10R-octadecatrienoate beta-oxidation	2	2	Positive	up-regulated	0.0163012	1	1	E56,E55	CE5314/CE5326,CE5309/CE5321	8(R)-hydroxy-hexadeca-2E,4E,6E,10Z-tetraenoate/8(S)-hydroxy-hexadeca-2E,4E,6E,10Z-tetraenoate$3-oxo-8(R)-hydroxy-hexadeca-6E,10Z-dienoate/3-oxo-8(S)-hydroxy-hexadeca-6E,10Z-dienoate	up_pos
infant_pn12	Beta-Alanine metabolism	3	8	Positive	down-regulated	0.0324342	375	-375	E31,E84,E5	C00135,C00750,C00049/C00402	L-Histidine$Spermine$L-Aspartate/D-Aspartate	down_pos
infant_pn12	C21-steroid hormone biosynthesis and metabolism	3	9	Negative	down-regulated	0.0401647	0.333333	-0.333333	E115,E106,E137	C03917/C05293/C00523/C04373/C04295,C05301/hestratriol/C05141/CE2179,C02538	5alpha-Dihydrotestosterone/5beta-Dihydrotestosterone/Androsterone/3alpha-Hydroxy-5beta-androstan-17-one; Etiocholan-3alpha-ol-17-one; 3alpha-Hydroxyetiocholan-17-one/Androst-5-ene-3beta,17beta-diol; 3beta,17beta-Dihydroxyandrost-5-ene; 3beta,17beta-Dihydroxy-5-androstene; Androstenediol$2-Hydroxyestradiol-17beta; 2-OH-Estradiol/4,17 dihydroxy estradiol/Estriol; 1,3,5(10)-Estratriene-3,16-alpha,17…	down_neg
infant_pn12	Limonene and pinene degradation	3	4	Positive	up-regulated	0.0128561	0.75	0.75	E21,E111,E19	C02452/C11409/C02759/C00964,CE2435/t2m26dcoa/c2m26dcoa,C02452/C11409/C02759/C00964	Perillyl alcohol; (-)-Perillyl alcohol; p-Mentha-1,8-dien-7-ol; (-)-Perillylalcohol/(+)-trans-Carveol; (4S,6R)-trans-Carveol//(-)-trans-Carveol$trans,cis-deca-2,4-dienoyl-CoA/trans-2-Methyl-5-isopropylhexa-2,5-dienoyl-CoA/cis-2-Methyl-5-isopropylhexa-2,5-dienoyl-CoA$Perillyl alcohol; (-)-Perillyl alcohol; p-Mentha-1,8-dien-7-ol; (-)-Perillylalcohol/(+)-trans-Carveol; (4S,6R)-trans-Carveol//(-)-tr…	up_pos
infant_pn12	Lysine metabolism	4	13	Positive	down-regulated	0.0318461	0.307692	-0.307692	E23,E70,E22,E61	C05936/C00408,C00322,C05936/C00408,C05545	N4-Acetylaminobutanal/L-Pipecolate; Pipecolinic acid; Pipecolic acid; 2-Piperidinecarboxylic acid$2-Oxoadipate$N4-Acetylaminobutanal/L-Pipecolate; Pipecolinic acid; Pipecolic acid; 2-Piperidinecarboxylic acid$Histone N6,N6-dimethyl-L-lysine	down_pos
infant_pn12	Nucleotide Sugar Metabolism	2	2	Positive	up-regulated	0.0163012	1	1	E100,E180	C00459,C00190	dTTP$UDP-D-xylose	up_pos
infant_pn12	Phytanic acid peroxisomal oxidation	2	3	Positive	up-regulated	0.041173	0.666667	0.666667	E107,E3	C00798,C02170/C00042	Formyl-CoA$Methylmalonate; Methylmalonic acid/Succinate	up_pos
infant_pn12	Prostaglandin formation from arachidonate	4	7	Negative	up-regulated	0.0206705	0.571429	0.571429	E49,E54,E47,E55	C05963,CE5730,C00696/C04853/C06315/C06314/C00584/C04654/C04671/C01312/C02198/C00427,CE4980	$$Prostaglandin D2/w-hydroxyl leukotriene B4/Lipoxin B4; LXB4; 5S,14R,15S-Trihydroxy-6E,8Z,10E,12E-eicosatetraenoic acid; (6E,8Z,10E,12E)-(5S,14R,15S)-Trihydroxyicosa-6,8,10,12-tetraenoic acid/Lipoxin A4; LXA4; 5S,6R,15S-Trihydroxy-7E,9E,11Z,13E-eicosatetraenoic acid; (7E,9E,11Z,13E)-(5S,6R,15S)-5,6,15-Trihydroxyicosa-7,9,11,13-tetraenoic acid/Prostaglandin E2/(13E)-11alpha-Hydroxy-9,15-dioxopros…	up_neg
infant_pn12	Purine metabolism	6	17	Positive	down-regulated	0.00806655	0.352941	-0.352941	E75,E149,E5,E122,E177,E125	C00366,C06196,C00049/C00402,C04640,C01344,C03373	Urate$2'-Deoxyinosine 5'-phosphate; dIMP$L-Aspartate/D-Aspartate$2-(Formamido)-N1-(5-phospho-D-ribosyl)acetamidine$dIDP; 2'-Deoxyinosine-5'-diphosphate; 2'-Deoxyinosine 5'-diphosphate$5-amino-1-(5-phospho-D-ribosyl)imidazole	down_pos
infant_pn12	Vitamin B5 - CoA biosynthesis from pantothenate	2	2	Positive	up-regulated	0.0163012	1	1	E38,E62	C00864,C04079	(R)-Pantothenate$N-((R)-Pantothenoyl)-L-cysteine; D-Pantothenoyl-L-cysteine; N-Pantothenoylcysteine	up_pos
infant_pn12	Vitamin D3 (cholecalciferol) metabolism	2	3	Positive	up-regulated	0.041173	0.666667	0.666667	E67,E85	CE6027,C05457/C01673/CE2201/C17336/C17331/C17333/C17332	24,25,26,27-tetranor-23-oxo-hydroxyvitamin D3$7alpha,12alpha-Dihydroxycholest-4-en-3-one/Calcitriol/23S,25-dihydroxyvitamin D3/7alpha,26-Dihydroxy-4-cholesten-3-one///7alpha,25-Dihydroxy-4-cholesten-3-one	up_pos
infant_pn34	3-oxo-10R-octadecatrienoate beta-oxidation	2	3	Positive	up-regulated	0.0245358	0.666667	0.666667	E93,E95	CE5309/CE5321,CE5314/CE5326	3-oxo-8(R)-hydroxy-hexadeca-6E,10Z-dienoate/3-oxo-8(S)-hydroxy-hexadeca-6E,10Z-dienoate$8(R)-hydroxy-hexadeca-2E,4E,6E,10Z-tetraenoate/8(S)-hydroxy-hexadeca-2E,4E,6E,10Z-tetraenoate	up_pos
infant_pn34	Arachidonic acid metabolism	6	11	Positive	down-regulated	0.0138644	0.545455	-0.545455	E206,E207,E183,E138,E204,E260	C06426/C06427,C06426/C06427,C05951,C05356/C00959/C04685/C04686/C05966/C05965/C14813/C02165/C04849/C14781,C00219,CE7114/CE2053/CE5138/CE5661/CE7115/CE7113/CE7112/CE7088	(6Z,9Z,12Z)-Octadecatrienoic acid; 6,9,12-Octadecatrienoic acid; gamma-Linolenic acid; Gamolenic acid/(9Z,12Z,15Z)-Octadecatrienoic acid; alpha-Linolenic acid; 9,12,15-Octadecatrienoic acid; Linolenate; alpha-Linolenate$(6Z,9Z,12Z)-Octadecatrienoic acid; 6,9,12-Octadecatrienoic acid; gamma-Linolenic acid; Gamolenic acid/(9Z,12Z,15Z)-Octadecatrienoic acid; alpha-Linolenic acid; 9,12,15-Octadecatri…	down_pos
infant_pn34	Arginine and Proline Metabolism	4	7	Positive	down-regulated	0.0226031	0.571429	-0.571429	E26,E22,E73,E1	C00064/C05100/C00819,C01165/C01157/C00430/C03440/C01110,C00170,C00122	L-Glutamine/3-Ureidoisobutyrate/D-Glutamine; D-2-Aminoglutaramic acid$L-Glutamate 5-semialdehyde; L-Glutamate gamma-semialdehyde/trans-4-Hydroxy-L-proline/5-Aminolevulinate; 5-Amino-4-oxopentanoate; 5-Amino-4-oxovaleric acid/cis-4-Hydroxy-D-proline/5-Amino-2-oxopentanoic acid; 5-Amino-2-oxopentanoate; 2-Oxo-5-amino-pentanoate; 2-Oxo-5-aminopentanoate; alpha-Keto-delta-aminopentanoate; 2-Oxo-5-ami…	down_pos
infant_pn34	Blood Group Biosynthesis	2	2	Negative	up-regulated	0.000756239	1	1	E50,E52	C00029/C00052,C00203/C00043/C01170	UDPglucose/UDPgalactose$UDP-N-acetyl-D-galactosamine/UDP-N-acetyl-D-glucosamine/UDP-N-acetyl-D-mannosamine	up_neg
infant_pn34	Chondroitin sulfate degradation	1	1	Negative	up-regulated	0.0305857	1	1	E4	C00259/C00309/C00312/C00310/C00121/C00181	L-Arabinose/D-Ribulose; D-erythro-2-Pentulose; D-Arabinoketose; D-Arabinulose; D-Riboketose/L-Xylulose/D-Xylulose/D-Ribose/D-Xylose	up_neg
infant_pn34	De novo fatty acid biosynthesis	6	13	Positive	down-regulated	0.025208	0.461538	-0.461538	E206,E207,E83,E48,E89,E204	C06426/C06427,C06426/C06427,C03242,C06424,C01530,C00219	(6Z,9Z,12Z)-Octadecatrienoic acid; 6,9,12-Octadecatrienoic acid; gamma-Linolenic acid; Gamolenic acid/(9Z,12Z,15Z)-Octadecatrienoic acid; alpha-Linolenic acid; 9,12,15-Octadecatrienoic acid; Linolenate; alpha-Linolenate$(6Z,9Z,12Z)-Octadecatrienoic acid; 6,9,12-Octadecatrienoic acid; gamma-Linolenic acid; Gamolenic acid/(9Z,12Z,15Z)-Octadecatrienoic acid; alpha-Linolenic acid; 9,12,15-Octadecatri…	down_pos
infant_pn34	Drug metabolism - other enzymes	2	3	Negative	down-regulated	0.0115957	0.666667	-0.666667	E36,E66	C16543,C16620	NPC$6-Methylthioguanosine monophosphate	down_neg
infant_pn34	Electron transport chain	1	1	Negative	down-regulated	0.0390723	1	-1	E143	C00399	Ubiquinone	down_neg
infant_pn34	Electron transport chain	2	2	Positive	down-regulated	0.0212587	1	-1	E112,E114	C00399,C00399	Ubiquinone$Ubiquinone	down_pos
infant_pn34	Fatty Acid Metabolism	4	7	Positive	down-regulated	0.0226031	0.571429	-0.571429	E198,E48,E89,E65	dmnoncoa,C06424,C01530,dmnoncrn	4,8 dimethylnonanoyl-CoA$tetradecanoate (n-C14:0)$octadecanoate (n-C18:0)$4,8 dimethylnonanoyl carnitine	down_pos
infant_pn34	Fatty acid activation	6	13	Positive	down-regulated	0.025208	0.461538	-0.461538	E206,E207,E83,E48,E89,E244	C06426/C06427,C06426/C06427,C03242,C06424,C01530,tmndnc/CE2540	(6Z,9Z,12Z)-Octadecatrienoic acid; 6,9,12-Octadecatrienoic acid; gamma-Linolenic acid; Gamolenic acid/(9Z,12Z,15Z)-Octadecatrienoic acid; alpha-Linolenic acid; 9,12,15-Octadecatrienoic acid; Linolenate; alpha-Linolenate$(6Z,9Z,12Z)-Octadecatrienoic acid; 6,9,12-Octadecatrienoic acid; gamma-Linolenic acid; Gamolenic acid/(9Z,12Z,15Z)-Octadecatrienoic acid; alpha-Linolenic acid; 9,12,15-Octadecatri…	down_pos
infant_pn34	Fatty acid oxidation	1	1	Negative	down-regulated	0.0390723	1	-1	E143	C00399	Ubiquinone	down_neg
infant_pn34	Fatty acid oxidation	3	4	Positive	down-regulated	0.0184858	0.75	-0.75	E198,E112,E114	dmnoncoa,C00399,C00399	4,8 dimethylnonanoyl-CoA$Ubiquinone$Ubiquinone	down_pos
infant_pn34	Fatty acid oxidation	1	1	Negative	up-regulated	0.0305857	1	1	E54	q10h2	Ubiquinol-10	up_neg
infant_pn34	Fructose and mannose metabolism	2	3	Positive	up-regulated	0.0245358	0.666667	0.666667	E68,E65	C01019,C01507/C00794/C01697	6-Deoxy-L-galactose; L-Fucose$L-Iditol/D-Sorbitol/Galactitol	up_pos
infant_pn34	Glycosphingolipid biosynthesis - ganglioseries	2	2	Negative	up-regulated	0.000756239	1	1	E50,E52	C00029/C00052,C00203/C00043/C01170	UDPglucose/UDPgalactose$UDP-N-acetyl-D-galactosamine/UDP-N-acetyl-D-glucosamine/UDP-N-acetyl-D-mannosamine	up_neg
infant_pn34	Glycosphingolipid biosynthesis - globoseries	2	2	Negative	up-regulated	0.000756239	1	1	E50,E52	C00029/C00052,C00203/C00043/C01170	UDPglucose/UDPgalactose$UDP-N-acetyl-D-galactosamine/UDP-N-acetyl-D-glucosamine/UDP-N-acetyl-D-mannosamine	up_neg
infant_pn34	Glycosphingolipid biosynthesis - lactoseries	2	2	Negative	up-regulated	0.000756239	1	1	E50,E52	C00029/C00052,C00203/C00043/C01170	UDPglucose/UDPgalactose$UDP-N-acetyl-D-galactosamine/UDP-N-acetyl-D-glucosamine/UDP-N-acetyl-D-mannosamine	up_neg
infant_pn34	Glycosphingolipid biosynthesis - neolactoseries	2	2	Negative	up-regulated	0.000756239	1	1	E50,E52	C00029/C00052,C00203/C00043/C01170	UDPglucose/UDPgalactose$UDP-N-acetyl-D-galactosamine/UDP-N-acetyl-D-glucosamine/UDP-N-acetyl-D-mannosamine	up_neg
infant_pn34	Glycosphingolipid metabolism	2	3	Negative	up-regulated	0.00571381	0.666667	0.666667	E50,E52	C00029/C00052,C00203/C00043/C01170	UDPglucose/UDPgalactose$UDP-N-acetyl-D-galactosamine/UDP-N-acetyl-D-glucosamine/UDP-N-acetyl-D-mannosamine	up_neg
infant_pn34	Heparan sulfate degradation	1	1	Negative	up-regulated	0.0305857	1	1	E4	C00259/C00309/C00312/C00310/C00121/C00181	L-Arabinose/D-Ribulose; D-erythro-2-Pentulose; D-Arabinoketose; D-Arabinulose; D-Riboketose/L-Xylulose/D-Xylulose/D-Ribose/D-Xylose	up_neg
infant_pn34	Hyaluronan Metabolism	1	1	Negative	up-regulated	0.0305857	1	1	E52	C00203/C00043/C01170	UDP-N-acetyl-D-galactosamine/UDP-N-acetyl-D-glucosamine/UDP-N-acetyl-D-mannosamine	up_neg
infant_pn34	Keratan sulfate biosynthesis	2	2	Negative	up-regulated	0.000756239	1	1	E50,E52	C00029/C00052,C00203/C00043/C01170	UDPglucose/UDPgalactose$UDP-N-acetyl-D-galactosamine/UDP-N-acetyl-D-glucosamine/UDP-N-acetyl-D-mannosamine	up_neg
infant_pn34	Leukotriene metabolism	7	12	Positive	down-regulated	0.00815058	0.583333	-0.583333	E183,E138,E149,E262,E107,E204,E260	C05951,C05356/C00959/C04685/C04686/C05966/C05965/C14813/C02165/C04849/C14781,CE5926/CE5930/CE2056/CE5534/CE5533/CE1447,CE5946,CE2054/CE5976,C00219,CE7114/CE2053/CE5138/CE5661/CE7115/CE7113/CE7112/CE7088	Leukotriene D4; LTD4$5-Hydroperoxy-6-trans-8,11,14-cis-eicosatetraenoate/Prostaglandin B1/(13E)-(15S)-15-Hydroxy-9-oxoprosta-10,13-dienoate; Prostaglandin A1; PGA1/(13E)-(15S)-15-Hydroxy-9-oxoprosta-11,13-dienoate; Prostaglandin C1/15(S)-HPETE; (5Z,8Z,11Z,13E)-(15S)-15-Hydroperoxyicosa-5,8,11,13-tetraenoic acid; 15-Hydroperoxyeicosatetraenoate; 15-Hydroperoxyicosatetraenoate; 15-Hydroperoxyeicosa…	down_pos
infant_pn34	Linoleate metabolism	5	12	Negative	down-regulated	0.00420133	0.416667	-0.416667	E136,E130,E8,E28,E134	C01601,CE2047/CE2049,CE2006/CE6506,CE2577,C01595	$9,10-hydroxyoctadec-12(Z)-enoate/12,13-hydroxyoctadec-9(Z)-enoate$/$$linoleic acid (all cis C18:2) n-6	down_neg
infant_pn34	Linoleate metabolism	2	4	Negative	up-regulated	0.0136123	0.5	0.5	E30,E28	C06426/C06427,C14762/C14826/C14825	(6Z,9Z,12Z)-Octadecatrienoic acid; 6,9,12-Octadecatrienoic acid; gamma-Linolenic acid; Gamolenic acid/(9Z,12Z,15Z)-Octadecatrienoic acid; alpha-Linolenic acid; 9,12,15-Octadecatrienoic acid; Linolenate; alpha-Linolenate$13(S)-HODE; (13S)-Hydroxyoctadecadienoic acid; (9Z, 11E)-(13S)-13-Hydroxyoctadeca-9,11-dienoic acid/12(13)-EpOME; (12R,13S)-(9Z)-12,13-Epoxyoctadecenoic acid/9(10)-EpOME; (9R,10S)…	up_neg
infant_pn34	N-Glycan biosynthesis	2	2	Negative	up-regulated	0.000756239	1	1	E50,E52	C00029/C00052,C00203/C00043/C01170	UDPglucose/UDPgalactose$UDP-N-acetyl-D-galactosamine/UDP-N-acetyl-D-glucosamine/UDP-N-acetyl-D-mannosamine	up_neg
infant_pn34	O-Glycan biosynthesis	2	2	Negative	up-regulated	0.000756239	1	1	E50,E52	C00029/C00052,C00203/C00043/C01170	UDPglucose/UDPgalactose$UDP-N-acetyl-D-galactosamine/UDP-N-acetyl-D-glucosamine/UDP-N-acetyl-D-mannosamine	up_neg
infant_pn34	Omega-3 fatty acid metabolism	4	5	Positive	down-regulated	0.00915889	0.8	-0.8	E206,E207,E77,E244	C06426/C06427,C06426/C06427,C16300,tmndnc/CE2540	(6Z,9Z,12Z)-Octadecatrienoic acid; 6,9,12-Octadecatrienoic acid; gamma-Linolenic acid; Gamolenic acid/(9Z,12Z,15Z)-Octadecatrienoic acid; alpha-Linolenic acid; 9,12,15-Octadecatrienoic acid; Linolenate; alpha-Linolenate$(6Z,9Z,12Z)-Octadecatrienoic acid; 6,9,12-Octadecatrienoic acid; gamma-Linolenic acid; Gamolenic acid/(9Z,12Z,15Z)-Octadecatrienoic acid; alpha-Linolenic acid; 9,12,15-Octadecatri…	down_pos
infant_pn34	Omega-3 fatty acid metabolism	1	1	Negative	up-regulated	0.0305857	1	1	E30	C06426/C06427	(6Z,9Z,12Z)-Octadecatrienoic acid; 6,9,12-Octadecatrienoic acid; gamma-Linolenic acid; Gamolenic acid/(9Z,12Z,15Z)-Octadecatrienoic acid; alpha-Linolenic acid; 9,12,15-Octadecatrienoic acid; Linolenate; alpha-Linolenate	up_neg
infant_pn34	Prostaglandin formation from arachidonate	6	10	Positive	down-regulated	0.00991513	0.6	-0.6	E151,E138,E149,E90,E200,E204	C05962/C05956,C05356/C00959/C04685/C04686/C05966/C05965/C14813/C02165/C04849/C14781,CE5926/CE5930/CE2056/CE5534/CE5533/CE1447,C13856,CE5700,C00219	/Prostaglandin G2; PGG2$5-Hydroperoxy-6-trans-8,11,14-cis-eicosatetraenoate/Prostaglandin B1/(13E)-(15S)-15-Hydroxy-9-oxoprosta-10,13-dienoate; Prostaglandin A1; PGA1/(13E)-(15S)-15-Hydroxy-9-oxoprosta-11,13-dienoate; Prostaglandin C1/15(S)-HPETE; (5Z,8Z,11Z,13E)-(15S)-15-Hydroperoxyicosa-5,8,11,13-tetraenoic acid; 15-Hydroperoxyeicosatetraenoate; 15-Hydroperoxyicosatetraenoate; 15-Hydroperoxyeic…	down_pos
infant_pn34	Prostaglandin formation from arachidonate	2	3	Positive	up-regulated	0.0245358	0.666667	0.666667	E113,E117	CE2446/CE6240/CE6251/CE2445/CE7172/CE5179/CE5815/CE5343/CE7096/CE5944,C05962/C05956	6E-12-epi-LTB4/9-deoxy-delta12-PGD2/12,20-DiHETE/6-trans-leukotriene B4/14,15-DiHETE/6,7-dihydro-5-oxo-leukotriene B4/20-hydroxy-5S-HETE/6,7-dihydro-5-oxo-12-epi-LTB4/5,15-DiHETE/10,11-dihydro-12-oxo-LTB4$/Prostaglandin G2; PGG2	up_pos
infant_pn34	Proteoglycan biosynthesis	2	2	Negative	up-regulated	0.000756239	1	1	E50,E52	C00029/C00052,C00203/C00043/C01170	UDPglucose/UDPgalactose$UDP-N-acetyl-D-galactosamine/UDP-N-acetyl-D-glucosamine/UDP-N-acetyl-D-mannosamine	up_neg
infant_pn34	Putative anti-Inflammatory metabolites formation from EPA	3	3	Positive	down-regulated	0.009495	1	-1	E244,E155,E260	tmndnc/CE2540,C04707/C06439,CE7114/CE2053/CE5138/CE5661/CE7115/CE7113/CE7112/CE7088	timnodonic acid C20:5, n-3/timnodonate$(5Z,13E)-11alpha-Hydroxy-9,15-dioxoprost-13-enoate; (5Z)-(15S)-11alpha-Hydroxy-9,15-dioxoprosta-13-enoate/Prostaglandin E3$/20-oxo-leukotriene B4/12-oxo-20-hydroxy-leukotriene B4/15-oxo-lipoxin A4/20-hydroxy-leukotriene B5/15-epi-lipoxin B5/15-epi-lipoxin A5/PGH3	down_pos
infant_pn34	Pyrimidine metabolism	4	6	Positive	down-regulated	0.0152928	0.666667	-0.666667	E26,E112,E114,E58	C00064/C05100/C00819,C00399,C00399,C16637/C00672/C00673	L-Glutamine/3-Ureidoisobutyrate/D-Glutamine; D-2-Aminoglutaramic acid$Ubiquinone$Ubiquinone$5-Deoxyribose-1-phosphate; 5-Deoxy-alpha-D-ribose-1-phosphate/2-Deoxy-D-ribose 1-phosphate/2-Deoxy-D-ribose 5-phosphate	down_pos
infant_pn34	Starch and Sucrose Metabolism	1	1	Negative	up-regulated	0.0305857	1	1	E50	C00029/C00052	UDPglucose/UDPgalactose	up_neg
infant_pn34	TCA cycle	1	1	Negative	down-regulated	0.0390723	1	-1	E143	C00399	Ubiquinone	down_neg
infant_pn34	TCA cycle	3	5	Positive	down-regulated	0.0341148	0.6	-0.6	E112,E114,E1	C00399,C00399,C00122	Ubiquinone$Ubiquinone$Fumarate	down_pos
infant_pn34	Tyrosine metabolism	6	14	Positive	up-regulated	0.00731031	0.428571	0.428571	E7,E52,E35,E62,E50,E8	C00232/C06002/C00349/C00109/C00164,C05576,C05587/C07453,CE5276,C04043/C00642/C05852,C05577/C00544/C01161	Succinate semialdehyde; Succinic semialdehyde; 4-Oxobutanoate/(S)-Methylmalonate semialdehyde/2-Methyl-3-oxopropanoate; 3-Oxo-2-methylpropanoate; Methylmalonate semialdehyde/2-Oxobutanoate/Acetoacetate$3,4-Dihydroxyphenylethyleneglycol$3-Methoxytyramine/Epinine; Deoxyepinephrine$dopamine o-quinone$3,4-Dihydroxyphenylacetaldehyde; Protocatechuatealdehyde/4-Hydroxyphenylacetate/2-Hydroxyphenylaceta…	up_pos
infant_pn34	Urea cycle/amino group metabolism	2	4	Negative	down-regulated	0.0199143	0.5	-0.5	E37,E16	C01449,C05589/C00788	Queuine; Base Q$L-Normetanephrine/L-Adrenaline; (R)-(-)-Adrenaline; (R)-(-)-Epinephrine; (R)-(-)-Epirenamine; (R)-(-)-Adnephrine; 4-[(1R)-1-Hydroxy-2-(methylamino)ethyl]-1,2-benzenediol	down_neg
infant_pn56	Alkaloid biosynthesis II	2	5	Positive	down-regulated	0.0225191	0.4	-0.4	E74,E3	C12448/egme,C02723/C01672	Ecgonine methyl ester; Methyl ecgonine/ecgonine methyl ester$N-Methylputrescine/Cadaverine; 1,5-Pentanediamine; 1,5-Diaminopentane; Pentamethylenediamine	down_pos
infant_pn56	Ascorbate (Vitamin C) and Aldarate Metabolism	7	15	Negative	down-regulated	0.00420133	0.466667	-0.466667	E194,E172,E245,E210,E174,E218,E177	C02670/C00072/glac,C00158/C04575/C00311,C00818,C00257/C00800,C00158/C04575/C00311,C01040/C05394/C00198,C00425/C00417	D-glucurono-6,3-lactone/L-Ascorbate/D-glucurono-6,3-lactone$Citrate//Isocitrate$D-Glucarate$D-Gluconate/L-Gulonate$Citrate//Isocitrate$L-Gulono-1,4-lactone; L-Gulono-gamma-lactone; gamma-Gulonolactone; L-Gulonic acid gamma-lactone; L-Gulonolactone/3-Keto-beta-D-galactose/D-Glucono-1,5-lactone; Gluconic lactone; Gluconic acid lactone; 1,5-Gluconolactone; delta-Gluconolactone; D-Gluconolactone; Glu…	down_neg
infant_pn56	Ascorbate (Vitamin C) and Aldarate Metabolism	3	8	Negative	up-regulated	0.0216789	375	375	E31,E33,E13	C00158/C04575/C00311,C00425/C00417,C01620/C00262	Citrate//Isocitrate$Dehydroascorbate/cis-Aconitate; cis-Aconitic acid$/Hypoxanthine	up_neg
infant_pn56	Aspartate and asparagine metabolism	6	16	Negative	down-regulated	0.022267	375	-375	E243,E39,E156,E184,E26,E7	C00026,C00049/C00402,C05932,C03239/C02946/C04076,C01165/C01157/C00430/C03440/C01110,C02356/C01026/C00334/C05145/C01205/C03284	2-Oxoglutarate$L-Aspartate/D-Aspartate$N-Succinyl-L-glutamate 5-semialdehyde; (2S)-2-(3-Carboxypropanoylamino)-5-oxopentanoic acid$6-Amino-2-oxohexanoate; 2-Oxo-6-aminocaproate/4-Acetamidobutanoate/L-2-Aminoadipate 6-semialdehyde; 2-Aminoadipate 6-semialdehyde$L-Glutamate 5-semialdehyde; L-Glutamate gamma-semialdehyde/trans-4-Hydroxy-L-proline/5-Aminolevulinate; 5-Amino-4-oxopentanoate; 5-Amino-4…	down_neg
infant_pn56	C21-steroid hormone biosynthesis and metabolism	5	11	Positive	up-regulated	0.012604	0.454545	0.454545	E118,E109,E85,E211,E59	C01124/C05469/C00735/C05473,C00762/C01780,C03917/C05293/C00523/C04373/C04295,estroneglc/C11133,17ahprgstrn/C03205/C05498/C01176	18-Hydroxycorticosterone/17alpha,21-Dihydroxy-5beta-pregnane-3,11,20-trione; 5beta-Pregnane-17alpha,21-diol-3,11,20-trione; 4,5beta-Dihydrocortisone/Cortisol; Hydrocortisone; 11beta,17alpha,21-Trihydroxy-4-pregnene-3,20-dione; Kendall's compound F; Reichstein's substance M/11beta,21-Dihydroxy-3,20-oxo-5beta-pregnan-18-al$Cortisone; 17alpha,21-Dihydroxy-4-pregnene-3,11,20-trione; Kendall's compoun…	up_pos
infant_pn56	D4&E4-neuroprostanes formation	1	1	Positive	down-regulated	0.0305016	1	-1	E173	CE6466/CE6467/CE6465/CE6462/CE6463/CE6460/CE6461/CE6459/CE6458/CE6457/CE6455/CE6454/CE6453/CE6452/CE6456/CE6464	///////////////	down_pos
infant_pn56	D4&E4-neuroprostanes formation	1	1	Negative	up-regulated	0.0326863	1	1	E33	C00425/C00417	Dehydroascorbate/cis-Aconitate; cis-Aconitic acid	up_neg
infant_pn56	Glycosphingolipid metabolism	2	7	Positive	down-regulated	0.041257	0.285714	-0.285714	E124,E210	C12126,C00550	dihydroceramide $Sphingomyelin	down_pos
infant_pn56	Glycosphingolipid metabolism	4	6	Positive	up-regulated	0.00277288	0.666667	0.666667	E216,E96,E167,E215	C02934/C00319,C00836,C00016,C12144	3-Dehydrosphinganine/Sphingosine$Sphinganine$Flavin adenine dinucleotide oxidized$Phytosphingosine; 4-D-Hydroxysphinganine	up_pos
infant_pn56	N-Glycan Degradation	2	3	Negative	up-regulated	0.0139484	0.666667	0.666667	E42,E98	C01019,s2l2n2m2mn	6-Deoxy-L-galactose; L-Fucose$de-Fuc, reducing GlcNAc removed form of PA6 (w/o peptide linkage)	up_neg
infant_pn56	Omega-3 fatty acid metabolism	1	1	Negative	up-regulated	0.0326863	1	1	E68	C06426/C06427	(6Z,9Z,12Z)-Octadecatrienoic acid; 6,9,12-Octadecatrienoic acid; gamma-Linolenic acid; Gamolenic acid/(9Z,12Z,15Z)-Octadecatrienoic acid; alpha-Linolenic acid; 9,12,15-Octadecatrienoic acid; Linolenate; alpha-Linolenate	up_neg
infant_pn56	Purine metabolism	3	5	Negative	up-regulated	0.00428535	0.6	0.6	E28,E2,E13	CE6252/C03722,C00385,C01620/C00262	/Quinolinate$Xanthine$/Hypoxanthine	up_neg
infant_pn56	Sialic acid metabolism	1	1	Negative	up-regulated	0.0326863	1	1	E85	C05396	Lactose 6-phosphate	up_neg
infant_pn56	Sphingolipid metabolism	1	1	Positive	down-regulated	0.0305016	1	-1	E210	C00550	Sphingomyelin	down_pos
infant_pn56	Squalene and cholesterol biosynthesis	4	22	Positive	down-regulated	0.0397446	0.181818	-0.181818	E24,E147,E148,E168	C00418,C01802/C00599/C05437/C05439/C01164/C05443,C01802/C00599/C05437/C05439/C01164/C05443,C01789/C08825	(R)-Mevalonate$Desmosterol; 24-Dehydrocholesterol; Cholesta-5,24-dien-3beta-ol/Cholest-4-en-3-one; Cholestenone; 4-Cholesten-3-one/Zymosterol; delta8,24-Cholestadien-3beta-ol; 5alpha-Cholesta-8,24-dien-3beta-ol/5alpha-Cholesta-7,24-dien-3beta-ol/Cholesta-5,7-dien-3beta-ol; 7-Dehydrocholesterol; Provitamin D3/Vitamin D3; Cholecalciferol$Desmosterol; 24-Dehydrocholesterol; Cholesta-5,24-dien-3beta-…	down_pos
infant_pn56	TCA cycle	4	9	Negative	down-regulated	0.0262163	0.444444	-0.444444	E174,E243,E177,E172	C00158/C04575/C00311,C00026,C00425/C00417,C00158/C04575/C00311	Citrate//Isocitrate$2-Oxoglutarate$Dehydroascorbate/cis-Aconitate; cis-Aconitic acid$Citrate//Isocitrate	down_neg
infant_pn56	TCA cycle	3	5	Negative	up-regulated	0.00428535	0.6	0.6	E5,E31,E33	C02170/C00042,C00158/C04575/C00311,C00425/C00417	Methylmalonate; Methylmalonic acid/Succinate$Citrate//Isocitrate$Dehydroascorbate/cis-Aconitate; cis-Aconitic acid	up_neg
infant_pn56	Urea cycle/amino group metabolism	8	11	Negative	down-regulated	8.40266e-05	0.727273	-0.727273	E243,E1,E83,E39,E184,E26,E7,E105	C00026,CE2934,C05589/C00788,C00049/C00402,C03239/C02946/C04076,C01165/C01157/C00430/C03440/C01110,C02356/C01026/C00334/C05145/C01205/C03284,C04441	2-Oxoglutarate$o-methylhippurate$L-Normetanephrine/L-Adrenaline; (R)-(-)-Adrenaline; (R)-(-)-Epinephrine; (R)-(-)-Epirenamine; (R)-(-)-Adnephrine; 4-[(1R)-1-Hydroxy-2-(methylamino)ethyl]-1,2-benzenediol$L-Aspartate/D-Aspartate$6-Amino-2-oxohexanoate; 2-Oxo-6-aminocaproate/4-Acetamidobutanoate/L-2-Aminoadipate 6-semialdehyde; 2-Aminoadipate 6-semialdehyde$L-Glutamate 5-semialdehyde; L-Glutamate ga…	down_neg
infant_pn56	Vitamin D	2	5	Positive	down-regulated	0.0225191	0.4	-0.4	E147,E148	C01802/C00599/C05437/C05439/C01164/C05443,C01802/C00599/C05437/C05439/C01164/C05443	Desmosterol; 24-Dehydrocholesterol; Cholesta-5,24-dien-3beta-ol/Cholest-4-en-3-one; Cholestenone; 4-Cholesten-3-one/Zymosterol; delta8,24-Cholestadien-3beta-ol; 5alpha-Cholesta-8,24-dien-3beta-ol/5alpha-Cholesta-7,24-dien-3beta-ol/Cholesta-5,7-dien-3beta-ol; 7-Dehydrocholesterol; Provitamin D3/Vitamin D3; Cholecalciferol$Desmosterol; 24-Dehydrocholesterol; Cholesta-5,24-dien-3beta-ol/Cholest-4-en…	down_pos

## Sheet: metabolome_feature
pathway	feature	sample_type	feature_id	mz	rt	ionization_mode	compound_eid	compound	beta
Linoleate metabolism	rLC_neg_mtb_1005122	Milk	Milk::rLC_neg_mtb_1005122	279.232	79	Negative	E1	linoleic acid (all cis C18:2) n-6	-0.00588199
Pyrimidine metabolism	rLC_neg_mtb_1018482	Mother plasma	Mother plasma::rLC_neg_mtb_1018482	288.037	155	Negative	E1	dCMP	-0.404369
Ascorbate (Vitamin C) and Aldarate Metabolism	rLC_neg_mtb_10205178	Milk	Milk::rLC_neg_mtb_10205178	59.014	719	Negative	E754	NA	0.00792144
Bile acid biosynthesis	rLC_neg_mtb_10473123	Milk	Milk::rLC_neg_mtb_10473123	73.0296	727	Negative	E29	(R)-Lactaldehyde; D-Lactaldehyde; D-2-Hydroxypropionaldehyde$(S)-Lactaldehyde; L-Lactaldehyde; L-2-Hydroxypropionaldehyde$Hydroxyacetone; Acetol; 1-Hydroxy-2-propanone; 2-Ketopropyl alcohol; Acetone alcohol; Pyruvinalcohol; Pyruvic alcohol; Methylketol$Propionate (n-C3:0)	0.00747061
Squalene and cholesterol biosynthesis	rLC_neg_mtb_10473123	Milk	Milk::rLC_neg_mtb_10473123	73.0296	727	Negative	E29	(R)-Lactaldehyde; D-Lactaldehyde; D-2-Hydroxypropionaldehyde$(S)-Lactaldehyde; L-Lactaldehyde; L-2-Hydroxypropionaldehyde$Hydroxyacetone; Acetol; 1-Hydroxy-2-propanone; 2-Ketopropyl alcohol; Acetone alcohol; Pyruvinalcohol; Pyruvic alcohol; Methylketol$Propionate (n-C3:0)	0.00747061
Ascorbate (Vitamin C) and Aldarate Metabolism	rLC_neg_mtb_10568253	Milk	Milk::rLC_neg_mtb_10568253	59.0141	734	Negative	E754	NA	0.00792144
Ascorbate (Vitamin C) and Aldarate Metabolism	rLC_neg_mtb_10671239	Milk	Milk::rLC_neg_mtb_10671239	87.0087	754	Negative	E3	D-glucurono-6,3-lactone$L-Ascorbate$D-glucurono-6,3-lactone	-0.00272598
C5-Branched dibasic acid metabolism	rLC_neg_mtb_10671239	Milk	Milk::rLC_neg_mtb_10671239	87.0087	754	Negative	E3	D-glucurono-6,3-lactone$L-Ascorbate$D-glucurono-6,3-lactone	-0.00272598
D4&E4-neuroprostanes formation	rLC_neg_mtb_10671239	Milk	Milk::rLC_neg_mtb_10671239	87.0087	754	Negative	E3	D-glucurono-6,3-lactone$L-Ascorbate$D-glucurono-6,3-lactone	-0.00272598
Glycerophospholipid metabolism	rLC_neg_mtb_10671239	Milk	Milk::rLC_neg_mtb_10671239	87.0087	754	Negative	E3	D-glucurono-6,3-lactone$L-Ascorbate$D-glucurono-6,3-lactone	-0.00272598
Glycine, serine, alanine and threonine metabolism	rLC_neg_mtb_10671239	Milk	Milk::rLC_neg_mtb_10671239	87.0087	754	Negative	E3	D-glucurono-6,3-lactone$L-Ascorbate$D-glucurono-6,3-lactone	-0.00272598
Glyoxylate and Dicarboxylate Metabolism	rLC_neg_mtb_10671239	Milk	Milk::rLC_neg_mtb_10671239	87.0087	754	Negative	E3	D-glucurono-6,3-lactone$L-Ascorbate$D-glucurono-6,3-lactone	-0.00272598
Porphyrin metabolism	rLC_neg_mtb_10671239	Milk	Milk::rLC_neg_mtb_10671239	87.0087	754	Negative	E3	D-glucurono-6,3-lactone$L-Ascorbate$D-glucurono-6,3-lactone	-0.00272598
Propanoate metabolism	rLC_neg_mtb_10671239	Milk	Milk::rLC_neg_mtb_10671239	87.0087	754	Negative	E3	D-glucurono-6,3-lactone$L-Ascorbate$D-glucurono-6,3-lactone	-0.00272598
Purine metabolism	rLC_neg_mtb_10671239	Milk	Milk::rLC_neg_mtb_10671239	87.0087	754	Negative	E3	D-glucurono-6,3-lactone$L-Ascorbate$D-glucurono-6,3-lactone	-0.00272598
Pyruvate Metabolism	rLC_neg_mtb_10671239	Milk	Milk::rLC_neg_mtb_10671239	87.0087	754	Negative	E3	D-glucurono-6,3-lactone$L-Ascorbate$D-glucurono-6,3-lactone	-0.00272598
Tyrosine metabolism	rLC_neg_mtb_10671239	Milk	Milk::rLC_neg_mtb_10671239	87.0087	754	Negative	E3	D-glucurono-6,3-lactone$L-Ascorbate$D-glucurono-6,3-lactone	-0.00272598
Ascorbate (Vitamin C) and Aldarate Metabolism	rLC_neg_mtb_10688792	Milk	Milk::rLC_neg_mtb_10688792	191.019	746	Negative	E105	D-glucurono-6,3-lactone$L-Ascorbate$D-glucurono-6,3-lactone	0.0257378
Ascorbate (Vitamin C) and Aldarate Metabolism	rLC_neg_mtb_10730325	Milk	Milk::rLC_neg_mtb_10730325	101.024	756	Negative	E754	NA	0.688678
Ascorbate (Vitamin C) and Aldarate Metabolism	rLC_neg_mtb_10741257	Milk	Milk::rLC_neg_mtb_10741257	59.014	744	Negative	E754	NA	0.00792144
Methionine and cysteine metabolism	rLC_neg_mtb_1098388	Mother plasma	Mother plasma::rLC_neg_mtb_1098388	57.9759	0.159133	Negative	E4	Thiocyanate	0.221609
Beta-Alanine metabolism	rLC_neg_mtb_1121833	Mother VAMS	Mother VAMS::rLC_neg_mtb_1121833	132.03	0.121933	Negative	E53	L-Aspartate$D-Aspartate	-0.788938
Carbon fixation	rLC_neg_mtb_1121833	Mother VAMS	Mother VAMS::rLC_neg_mtb_1121833	132.03	0.121933	Negative	E53	L-Aspartate$D-Aspartate	-0.788938
Nitrogen metabolism	rLC_neg_mtb_1121833	Mother VAMS	Mother VAMS::rLC_neg_mtb_1121833	132.03	0.121933	Negative	E53	L-Aspartate$D-Aspartate	-0.788938
Purine metabolism	rLC_neg_mtb_1121833	Mother VAMS	Mother VAMS::rLC_neg_mtb_1121833	132.03	0.121933	Negative	E53	L-Aspartate$D-Aspartate	-0.788938
Vitamin B3 (nicotinate and nicotinamide) metabolism	rLC_neg_mtb_1121833	Mother VAMS	Mother VAMS::rLC_neg_mtb_1121833	132.03	0.121933	Negative	E53	L-Aspartate$D-Aspartate	-0.788938
Beta-Alanine metabolism	rLC_neg_mtb_1135453	Mother plasma	Mother plasma::rLC_neg_mtb_1135453	89.0247	0.1612	Negative	E7	D-Lactate$3-Hydroxypropanoate; 3-Hydroxypropanoic acid; 3-Hydroxypropionate; 3-Hydroxypropionic acid; Hydracrylic acid$L-Lactate$Dihydroxyacetone	-0.103215
Glycerophospholipid metabolism	rLC_neg_mtb_1135453	Mother plasma	Mother plasma::rLC_neg_mtb_1135453	89.0247	0.1612	Negative	E7	D-Lactate$3-Hydroxypropanoate; 3-Hydroxypropanoic acid; 3-Hydroxypropionate; 3-Hydroxypropionic acid; Hydracrylic acid$L-Lactate$Dihydroxyacetone	-0.103215
Glycolysis and Gluconeogenesis	rLC_neg_mtb_1135453	Mother plasma	Mother plasma::rLC_neg_mtb_1135453	89.0247	0.1612	Negative	E7	D-Lactate$3-Hydroxypropanoate; 3-Hydroxypropanoic acid; 3-Hydroxypropionate; 3-Hydroxypropionic acid; Hydracrylic acid$L-Lactate$Dihydroxyacetone	-0.103215
Glycosphingolipid metabolism	rLC_neg_mtb_1135453	Mother plasma	Mother plasma::rLC_neg_mtb_1135453	89.0247	0.1612	Negative	E7	D-Lactate$3-Hydroxypropanoate; 3-Hydroxypropanoic acid; 3-Hydroxypropionate; 3-Hydroxypropionic acid; Hydracrylic acid$L-Lactate$Dihydroxyacetone	-0.103215
Propanoate metabolism	rLC_neg_mtb_1135453	Mother plasma	Mother plasma::rLC_neg_mtb_1135453	89.0247	0.1612	Negative	E7	D-Lactate$3-Hydroxypropanoate; 3-Hydroxypropanoic acid; 3-Hydroxypropionate; 3-Hydroxypropionic acid; Hydracrylic acid$L-Lactate$Dihydroxyacetone	-0.103215
Pyruvate Metabolism	rLC_neg_mtb_1135453	Mother plasma	Mother plasma::rLC_neg_mtb_1135453	89.0247	0.1612	Negative	E7	D-Lactate$3-Hydroxypropanoate; 3-Hydroxypropanoic acid; 3-Hydroxypropionate; 3-Hydroxypropionic acid; Hydracrylic acid$L-Lactate$Dihydroxyacetone	-0.103215
De novo fatty acid biosynthesis	rLC_neg_mtb_1150262	Milk	Milk::rLC_neg_mtb_1150262	1075.33	89	Negative	E4	trans-eicos-2-enoyl-CoA$11-cis-eicosenoyl-CoA$dihomo-gamma-linolenyl coenzyme A	-0.00581762
Pentose phosphate pathway	rLC_neg_mtb_1157621	Mother VAMS	Mother VAMS::rLC_neg_mtb_1157621	190.072	0.119867	Negative	E6	L-Arabinose$D-Ribulose; D-erythro-2-Pentulose; D-Arabinoketose; D-Arabinulose; D-Riboketose$L-Xylulose$D-Xylulose$D-Ribose$D-Xylose	-0.290237
De novo fatty acid biosynthesis	rLC_neg_mtb_1183784	Milk	Milk::rLC_neg_mtb_1183784	1036.34	85	Negative	E4	trans-eicos-2-enoyl-CoA$11-cis-eicosenoyl-CoA$dihomo-gamma-linolenyl coenzyme A	-0.00136223
Methionine and cysteine metabolism	rLC_neg_mtb_1207565	Mother plasma	Mother plasma::rLC_neg_mtb_1207565	235.041	0.159133	Negative	E6	5-L-Glutamyl-taurine	0.272973
Pentose phosphate pathway	rLC_neg_mtb_1212379	Mother VAMS	Mother VAMS::rLC_neg_mtb_1212379	209.066	0.121933	Negative	E10	sedoheptulose	-0.232281
Ascorbate (Vitamin C) and Aldarate Metabolism	rLC_neg_mtb_1226475	Milk	Milk::rLC_neg_mtb_1226475	191.02	101	Negative	E92	D-glucurono-6,3-lactone$L-Ascorbate$D-glucurono-6,3-lactone	0.00792144
Ascorbate (Vitamin C) and Aldarate Metabolism	rLC_neg_mtb_1226899	Milk	Milk::rLC_neg_mtb_1226899	214.038	101	Negative	E29	Dehydroascorbate$cis-Aconitate; cis-Aconitic acid	0.00841971
Pentose phosphate pathway	rLC_neg_mtb_1298400	Mother VAMS	Mother VAMS::rLC_neg_mtb_1298400	149.045	0.1302	Negative	E6	L-Arabinose$D-Ribulose; D-erythro-2-Pentulose; D-Arabinoketose; D-Arabinulose; D-Riboketose$L-Xylulose$D-Xylulose$D-Ribose$D-Xylose	-0.296764
Pentose phosphate pathway	rLC_neg_mtb_1298602	Mother VAMS	Mother VAMS::rLC_neg_mtb_1298602	165.039	0.121933	Negative	E6	L-Arabinose$D-Ribulose; D-erythro-2-Pentulose; D-Arabinoketose; D-Arabinulose; D-Riboketose$L-Xylulose$D-Xylulose$D-Ribose$D-Xylose	-0.279508
Fatty acid oxidation	rLC_neg_mtb_1302458	Milk	Milk::rLC_neg_mtb_1302458	1102.37	97	Negative	E36	arachidyl coenzyme A$3(S)-phytanoyl-CoA$phytanyl coa	0.00248234
Leukotriene metabolism	rLC_neg_mtb_1314520	Milk	Milk::rLC_neg_mtb_1314520	167.071	99	Negative	E77	omega-carboxy-trinor-leukotriene B4	0.00527212
Tryptophan metabolism	rLC_neg_mtb_1315435	Mother VAMS	Mother VAMS::rLC_neg_mtb_1315435	166.016	0.1426	Negative	E6	2-Amino-3-carboxymuconate semialdehyde	-0.4165
Vitamin B3 (nicotinate and nicotinamide) metabolism	rLC_neg_mtb_1315435	Mother VAMS	Mother VAMS::rLC_neg_mtb_1315435	166.016	0.1426	Negative	E6	2-Amino-3-carboxymuconate semialdehyde	-0.4165
Pentose phosphate pathway	rLC_neg_mtb_1315569	Mother VAMS	Mother VAMS::rLC_neg_mtb_1315569	179.056	0.109533	Negative	E23	D-Glucose$beta-D-Glucose$beta-D-Fructose; beta-Fruit sugar; beta-D-arabino-Hexulose; beta-Levulose; Fructose$alpha-D-Glucose$beta-D-Galactose$D-Tagatose; lyxo-Hexulose$myo-Inositol$1,7-Dimethylxanthine; Paraxanthine$$alpha-D-Galactose$D-Mannose	-0.282306
Sialic acid metabolism	rLC_neg_mtb_1315569	Mother VAMS	Mother VAMS::rLC_neg_mtb_1315569	179.056	0.109533	Negative	E23	D-Glucose$beta-D-Glucose$beta-D-Fructose; beta-Fruit sugar; beta-D-arabino-Hexulose; beta-Levulose; Fructose$alpha-D-Glucose$beta-D-Galactose$D-Tagatose; lyxo-Hexulose$myo-Inositol$1,7-Dimethylxanthine; Paraxanthine$$alpha-D-Galactose$D-Mannose	-0.282306
Fatty acid oxidation	rLC_neg_mtb_1344001	Milk	Milk::rLC_neg_mtb_1344001	527.686	99	Negative	E36	arachidyl coenzyme A$3(S)-phytanoyl-CoA$phytanyl coa	0.0105659
CoA Catabolism	rLC_neg_mtb_1355357	Mother VAMS	Mother VAMS::rLC_neg_mtb_1355357	218.103	0.152933	Negative	E9	(R)-Pantothenate	0.762368
Vitamin B5 - CoA biosynthesis from pantothenate	rLC_neg_mtb_1355357	Mother VAMS	Mother VAMS::rLC_neg_mtb_1355357	218.103	0.152933	Negative	E9	(R)-Pantothenate	0.762368
De novo fatty acid biosynthesis	rLC_neg_mtb_1355440	Milk	Milk::rLC_neg_mtb_1355440	1098.38	101	Negative	E15	3(S)-hydroxy-13cis-docosenoyl-CoA	-0.00133145
Porphyrin metabolism	rLC_neg_mtb_1356251	Mother VAMS	Mother VAMS::rLC_neg_mtb_1356251	307.084	155	Negative	E9	Protoheme	-0.0568295
Ascorbate (Vitamin C) and Aldarate Metabolism	rLC_neg_mtb_1369021	Milk	Milk::rLC_neg_mtb_1369021	189.04	118	Negative	E84	Dihydrolipoate; Dihydrolipoic acid; Dihydrothioctic acid	0.0466514
Ascorbate (Vitamin C) and Aldarate Metabolism	rLC_neg_mtb_1369307	Milk	Milk::rLC_neg_mtb_1369307	232.047	163	Negative	E300	Citrate$$Isocitrate	0.00792144
Ascorbate (Vitamin C) and Aldarate Metabolism	rLC_neg_mtb_1386888	Milk	Milk::rLC_neg_mtb_1386888	235.045	107	Negative	E92	D-glucurono-6,3-lactone$L-Ascorbate$D-glucurono-6,3-lactone	0.0172878
Fatty acid oxidation	rLC_neg_mtb_1423897	Milk	Milk::rLC_neg_mtb_1423897	1008.3	118	Negative	E188	vaccenyl coenzyme A$gamma-linolenoyl-CoA$alpha-Linolenoyl-CoA$trans-Octadec-2-enoyl-CoA$Octadecenoyl-CoA (n-C18:1CoA)	0.0385519
De novo fatty acid biosynthesis	rLC_neg_mtb_1424228	Milk	Milk::rLC_neg_mtb_1424228	1026.33	101	Negative	E24	3-hydroxyoctadecanoyl-CoA	-0.00717834
De novo fatty acid biosynthesis	rLC_neg_mtb_1448615	Milk	Milk::rLC_neg_mtb_1448615	1046.34	112	Negative	E24	3-hydroxyoctadecanoyl-CoA	-0.278127
Valine, leucine and isoleucine degradation	rLC_neg_mtb_1453522	Mother VAMS	Mother VAMS::rLC_neg_mtb_1453522	130.087	0.150867	Negative	E40	L-Leucine$L-Isoleucine	-0.335237
De novo fatty acid biosynthesis	rLC_neg_mtb_1500832	Milk	Milk::rLC_neg_mtb_1500832	1026.32	116	Negative	E24	3-hydroxyoctadecanoyl-CoA	-0.0168365
Ascorbate (Vitamin C) and Aldarate Metabolism	rLC_neg_mtb_1511968	Milk	Milk::rLC_neg_mtb_1511968	87.0089	103	Negative	E92	D-glucurono-6,3-lactone$L-Ascorbate$D-glucurono-6,3-lactone	0.00792144
Fatty acid oxidation	rLC_neg_mtb_1527294	Milk	Milk::rLC_neg_mtb_1527294	1042.32	0.11	Negative	E188	vaccenyl coenzyme A$gamma-linolenoyl-CoA$alpha-Linolenoyl-CoA$trans-Octadec-2-enoyl-CoA$Octadecenoyl-CoA (n-C18:1CoA)	0.0135614
Ascorbate (Vitamin C) and Aldarate Metabolism	rLC_neg_mtb_1538653	Milk	Milk::rLC_neg_mtb_1538653	165.04	141	Negative	E742	NA	0.0197557
Ascorbate (Vitamin C) and Aldarate Metabolism	rLC_neg_mtb_1592324	Milk	Milk::rLC_neg_mtb_1592324	157.013	118	Negative	E92	D-glucurono-6,3-lactone$L-Ascorbate$D-glucurono-6,3-lactone	0.0119473
Drug metabolism - cytochrome P450	rLC_neg_mtb_1603319	Mother VAMS	Mother VAMS::rLC_neg_mtb_1603319	233.074	0.159133	Negative	E18	3-Hydroxycarbamazepine$2-Hydroxycarbamazepine$Carbamazepine-10,11-epoxide; Carbamazepine epoxide	-0.472761
Glyoxylate and Dicarboxylate Metabolism	rLC_neg_mtb_1615	Milk	Milk::rLC_neg_mtb_1615	131.035	0	Negative	E35	L-Arabinose$D-Ribulose; D-erythro-2-Pentulose; D-Arabinoketose; D-Arabinulose; D-Riboketose$L-Xylulose$D-Xylulose$D-Ribose$D-Xylose	-0.00271783
Purine metabolism	rLC_neg_mtb_1615	Milk	Milk::rLC_neg_mtb_1615	131.035	0	Negative	E35	L-Arabinose$D-Ribulose; D-erythro-2-Pentulose; D-Arabinoketose; D-Arabinulose; D-Riboketose$L-Xylulose$D-Xylulose$D-Ribose$D-Xylose	-0.00271783
Ascorbate (Vitamin C) and Aldarate Metabolism	rLC_neg_mtb_1619507	Milk	Milk::rLC_neg_mtb_1619507	179.056	134	Negative	E742	NA	0.00792144
Ascorbate (Vitamin C) and Aldarate Metabolism	rLC_neg_mtb_1643242	Milk	Milk::rLC_neg_mtb_1643242	135.029	134	Negative	E1001	NA	0.0261049
Ascorbate (Vitamin C) and Aldarate Metabolism	rLC_neg_mtb_1644894	Milk	Milk::rLC_neg_mtb_1644894	235.045	134	Negative	E92	D-glucurono-6,3-lactone$L-Ascorbate$D-glucurono-6,3-lactone	0.00627168
Fatty acid oxidation	rLC_neg_mtb_1661191	Milk	Milk::rLC_neg_mtb_1661191	1028.33	0.13	Negative	E188	vaccenyl coenzyme A$gamma-linolenoyl-CoA$alpha-Linolenoyl-CoA$trans-Octadec-2-enoyl-CoA$Octadecenoyl-CoA (n-C18:1CoA)	0.0142247
Ascorbate (Vitamin C) and Aldarate Metabolism	rLC_neg_mtb_1674759	Milk	Milk::rLC_neg_mtb_1674759	173.009	103	Negative	E29	Dehydroascorbate$cis-Aconitate; cis-Aconitic acid	0.566916
Ascorbate (Vitamin C) and Aldarate Metabolism	rLC_neg_mtb_1675363	Milk	Milk::rLC_neg_mtb_1675363	228.992	138	Negative	E300	Citrate$$Isocitrate	0.0144938
Ascorbate (Vitamin C) and Aldarate Metabolism	rLC_neg_mtb_1695154	Milk	Milk::rLC_neg_mtb_1695154	101.025	143	Negative	E742	NA	0.00792144
Ascorbate (Vitamin C) and Aldarate Metabolism	rLC_neg_mtb_1696589	Milk	Milk::rLC_neg_mtb_1696589	175.025	132	Negative	E92	D-glucurono-6,3-lactone$L-Ascorbate$D-glucurono-6,3-lactone	0.00792144
Leukotriene metabolism	rLC_neg_mtb_1705379	Milk	Milk::rLC_neg_mtb_1705379	553.117	136	Negative	E133	18E-20-oxo-20-CoA-LTB4	0.0451251
Leukotriene metabolism	rLC_neg_mtb_1705399	Milk	Milk::rLC_neg_mtb_1705399	554.124	138	Negative	E919	20-CoA-20-oxo-leukotriene B4	0.0129367
Ascorbate (Vitamin C) and Aldarate Metabolism	rLC_neg_mtb_171567	Mother plasma	Mother plasma::rLC_neg_mtb_171567	154.999	0.0062	Negative	E11	Dehydroascorbate$cis-Aconitate; cis-Aconitic acid	0.103728
TCA cycle	rLC_neg_mtb_171567	Mother plasma	Mother plasma::rLC_neg_mtb_171567	154.999	0.0062	Negative	E11	Dehydroascorbate$cis-Aconitate; cis-Aconitic acid	0.103728
Ascorbate (Vitamin C) and Aldarate Metabolism	rLC_neg_mtb_1728776	Milk	Milk::rLC_neg_mtb_1728776	87.0089	141	Negative	E92	D-glucurono-6,3-lactone$L-Ascorbate$D-glucurono-6,3-lactone	0.00792144
Pyrimidine metabolism	rLC_neg_mtb_1729419	Milk	Milk::rLC_neg_mtb_1729419	146.046	134	Negative	E139	D-Glutamate; D-Glutamic acid; D-Glutaminic acid; D-2-Aminoglutaric acid$L-Glutamate$L-4-Hydroxyglutamate semialdehyde	0.00804026
Ascorbate (Vitamin C) and Aldarate Metabolism	rLC_neg_mtb_1729639	Milk	Milk::rLC_neg_mtb_1729639	165.041	0.13	Negative	E742	NA	0.0225836
Ascorbate (Vitamin C) and Aldarate Metabolism	rLC_neg_mtb_1729750	Milk	Milk::rLC_neg_mtb_1729750	176.028	134	Negative	E111	D-glucurono-6,3-lactone$L-Ascorbate$D-glucurono-6,3-lactone	0.473177
Ascorbate (Vitamin C) and Aldarate Metabolism	rLC_neg_mtb_1730910	Milk	Milk::rLC_neg_mtb_1730910	267.072	103	Negative	E84	Dihydrolipoate; Dihydrolipoic acid; Dihydrothioctic acid	0.00792144
Ascorbate (Vitamin C) and Aldarate Metabolism	rLC_neg_mtb_1748591	Milk	Milk::rLC_neg_mtb_1748591	59.014	143	Negative	E742	NA	0.00792144
Ascorbate (Vitamin C) and Aldarate Metabolism	rLC_neg_mtb_1750084	Milk	Milk::rLC_neg_mtb_1750084	151.025	141	Negative	E1001	NA	0.0014294
Glycine, serine, alanine and threonine metabolism	rLC_neg_mtb_177490	Milk	Milk::rLC_neg_mtb_177490	184.001	19	Negative	E59	O-Phospho-L-serine	-0.00269854
Ascorbate (Vitamin C) and Aldarate Metabolism	rLC_neg_mtb_1782411	Milk	Milk::rLC_neg_mtb_1782411	243.009	161	Negative	E248	Lipoate; Lipoic acid; alpha-Lipoic acid; Thioctic acid$(2S,3R)-3-Hydroxybutane-1,2,3-tricarboxylate; Methylisocitrate; Methylisocitric acid	0.0270205
Ascorbate (Vitamin C) and Aldarate Metabolism	rLC_neg_mtb_1800189	Milk	Milk::rLC_neg_mtb_1800189	157.014	141	Negative	E111	D-glucurono-6,3-lactone$L-Ascorbate$D-glucurono-6,3-lactone	0.0113271
Ascorbate (Vitamin C) and Aldarate Metabolism	rLC_neg_mtb_1830550	Milk	Milk::rLC_neg_mtb_1830550	117.019	134	Negative	E1001	NA	0.53707
Glycerophospholipid metabolism	rLC_neg_mtb_1850066	Milk	Milk::rLC_neg_mtb_1850066	140.012	155	Negative	E68	Ethanolamine phosphate	-0.00696659
Ascorbate (Vitamin C) and Aldarate Metabolism	rLC_neg_mtb_1878648	Milk	Milk::rLC_neg_mtb_1878648	189.042	159	Negative	E85	Dihydrolipoate; Dihydrolipoic acid; Dihydrothioctic acid	0.378924
Ascorbate (Vitamin C) and Aldarate Metabolism	rLC_neg_mtb_1879289	Milk	Milk::rLC_neg_mtb_1879289	226.996	151	Negative	E300	Citrate$$Isocitrate	0.0316822
Ascorbate (Vitamin C) and Aldarate Metabolism	rLC_neg_mtb_2000144	Milk	Milk::rLC_neg_mtb_2000144	191.02	143	Negative	E300	Citrate$$Isocitrate	0.00792144
Pyrimidine metabolism	rLC_neg_mtb_2001936	Milk	Milk::rLC_neg_mtb_2001936	288.042	161	Negative	E205	dCMP	0.0150832
Omega-6 fatty acid metabolism	rLC_neg_mtb_2072948	Milk	Milk::rLC_neg_mtb_2072948	1082.34	172	Negative	E221	tetracosahexaenoyl coenzyme A$2-trans-9,12,15,18,21-all-cis-tetracosahexaenoyl-CoA$trans-2-all-cis-6,9,12,15,18-tetracosahexaenoyl-CoA$tetracosa-6,9,12,15,18,21-all-cis-hexaenoyl-CoA	0.00846874
Ascorbate (Vitamin C) and Aldarate Metabolism	rLC_neg_mtb_2110044	Milk	Milk::rLC_neg_mtb_2110044	241.012	149	Negative	E248	Lipoate; Lipoic acid; alpha-Lipoic acid; Thioctic acid$(2S,3R)-3-Hydroxybutane-1,2,3-tricarboxylate; Methylisocitrate; Methylisocitric acid	0.861919
Carnitine shuttle	rLC_neg_mtb_211609	Mother VAMS	Mother VAMS::rLC_neg_mtb_211609	1002.26	0.0227333	Negative	E42	stearidonoyl-CoA$2E,6Z,9Z,12Z-octadecatetraenoyl-CoA$stearidonyl coenzyme A	-0.324367
Fatty acid oxidation, peroxisome	rLC_neg_mtb_211609	Mother VAMS	Mother VAMS::rLC_neg_mtb_211609	1002.26	0.0227333	Negative	E42	stearidonoyl-CoA$2E,6Z,9Z,12Z-octadecatetraenoyl-CoA$stearidonyl coenzyme A	-0.324367
Omega-3 fatty acid metabolism	rLC_neg_mtb_211609	Mother VAMS	Mother VAMS::rLC_neg_mtb_211609	1002.26	0.0227333	Negative	E42	stearidonoyl-CoA$2E,6Z,9Z,12Z-octadecatetraenoyl-CoA$stearidonyl coenzyme A	-0.324367
Linoleate metabolism	rLC_neg_mtb_2116987	Milk	Milk::rLC_neg_mtb_2116987	593.134	172	Negative	E52	Oxidized glutathione	-0.00942953
Ascorbate (Vitamin C) and Aldarate Metabolism	rLC_neg_mtb_2159024	Milk	Milk::rLC_neg_mtb_2159024	119.035	167	Negative	E93	NA	-0.00774246
Ascorbate (Vitamin C) and Aldarate Metabolism	rLC_neg_mtb_2186215	Milk	Milk::rLC_neg_mtb_2186215	187.024	172	Negative	E248	Lipoate; Lipoic acid; alpha-Lipoic acid; Thioctic acid$(2S,3R)-3-Hydroxybutane-1,2,3-tricarboxylate; Methylisocitrate; Methylisocitric acid	0.709733
Purine metabolism	rLC_neg_mtb_2263079	Milk	Milk::rLC_neg_mtb_2263079	122.985	184	Negative	E99	alloxan	-0.00817735
Tyrosine metabolism	rLC_neg_mtb_2295834	Milk	Milk::rLC_neg_mtb_2295834	248.026	0.19	Negative	E44	Sulfate derivative of norepinephrine	-0.00298915
Omega-6 fatty acid metabolism	rLC_neg_mtb_2309830	Milk	Milk::rLC_neg_mtb_2309830	986.246	188	Negative	E261	cis-(3S)-hydroxytetradec-7-enoyl-CoA$(3S)-3-hydroxy-cis-8-tetradecenoyl-CoA$OPC4-CoA$3-oxo-(2S,6R,10R)-trimethyl-hendecanoyl-CoA	0.0113878
Pyrimidine metabolism	rLC_neg_mtb_2327059	Milk	Milk::rLC_neg_mtb_2327059	288.037	192	Negative	E206	dCMP	0.0271977
Leukotriene metabolism	rLC_neg_mtb_2368684	Milk	Milk::rLC_neg_mtb_2368684	1062.3	192	Negative	E301	5-oxo-12(R)-hydroxy-eicosa-8E,10E,14Z-trienoyl-CoA$5-oxo-12(S)-hydroxy-eicosa-8E,10E,14Z-trienoyl-CoA$5(S),12(R)-dihydroxy-eicosa-2,8-trans-6,14-cis-tetraenoyl-CoA	0.00582801
Pyrimidine metabolism	rLC_neg_mtb_262929	Milk	Milk::rLC_neg_mtb_262929	427.004	21	Negative	E314	IDP	0.00531066
Tyrosine metabolism	rLC_neg_mtb_2637154	Milk	Milk::rLC_neg_mtb_2637154	146.099	196	Negative	E106	Hordenine; 4-[2-(Dimethylamino)ethyl]phenol	-0.00883406
Chondroitin sulfate degradation	rLC_neg_mtb_2681	Mother plasma	Mother plasma::rLC_neg_mtb_2681	96.9604	0.00206667	Negative	E17	Sulfate	-0.011742
Glycosphingolipid metabolism	rLC_neg_mtb_2681	Mother plasma	Mother plasma::rLC_neg_mtb_2681	96.9604	0.00206667	Negative	E17	Sulfate	-0.011742
Heparan sulfate degradation	rLC_neg_mtb_2681	Mother plasma	Mother plasma::rLC_neg_mtb_2681	96.9604	0.00206667	Negative	E17	Sulfate	-0.011742
Keratan sulfate degradation	rLC_neg_mtb_2681	Mother plasma	Mother plasma::rLC_neg_mtb_2681	96.9604	0.00206667	Negative	E17	Sulfate	-0.011742
Methionine and cysteine metabolism	rLC_neg_mtb_2681	Mother plasma	Mother plasma::rLC_neg_mtb_2681	96.9604	0.00206667	Negative	E17	Sulfate	-0.011742
Ascorbate (Vitamin C) and Aldarate Metabolism	rLC_neg_mtb_2754432	Milk	Milk::rLC_neg_mtb_2754432	192.023	221	Negative	E302	Citrate$$Isocitrate	0.18529
Vitamin B9 (folate) metabolism	rLC_neg_mtb_2832525	Mother plasma	Mother plasma::rLC_neg_mtb_2832525	142.02	0.289333	Negative	E24	N1-(5-Phospho-D-ribosyl)glycinamide	-0.439615
Glycerophospholipid metabolism	rLC_neg_mtb_2871876	Milk	Milk::rLC_neg_mtb_2871876	243.048	0.24	Negative	E115	CDPcholine	-0.107516
Glycerophospholipid metabolism	rLC_neg_mtb_287547	Mother plasma	Mother plasma::rLC_neg_mtb_287547	222.023	0.0537333	Negative	E30	CDPethanolamine	0.281601
Squalene and cholesterol biosynthesis	rLC_neg_mtb_2899452	Milk	Milk::rLC_neg_mtb_2899452	147.066	223	Negative	E31	(R)-Mevalonate	0.0131399
Bile acid biosynthesis	rLC_neg_mtb_3194766	Mother plasma	Mother plasma::rLC_neg_mtb_3194766	451.342	0.330667	Negative	E26	5beta-cholestane-3alpha,7alpha,12alpha,23,25-pentol$5beta-cholestane-3alpha,7alpha,12alpha,25,27-pentol$5beta-cholestane-3alpha,7alpha,12alpha,24R,25-pentol$5beta-cholestane-3alpha,7alpha,12alpha,27,27-pentaol	-0.324532
Ascorbate (Vitamin C) and Aldarate Metabolism	rLC_neg_mtb_3240989	Milk	Milk::rLC_neg_mtb_3240989	191.02	244	Negative	E302	Citrate$$Isocitrate	0.00792144
Ascorbate (Vitamin C) and Aldarate Metabolism	rLC_neg_mtb_3241859	Milk	Milk::rLC_neg_mtb_3241859	232.047	238	Negative	E302	Citrate$$Isocitrate	0.00792144
Ubiquinone Biosynthesis	rLC_neg_mtb_3305665	Mother plasma	Mother plasma::rLC_neg_mtb_3305665	161.025	0.351333	Negative	E6	2-Hydroxy-3-(4-hydroxyphenyl)propenoate; 4-Hydroxy-enol-phenylpyruvate$Caffeate; Caffeic acid; 3,4-Dihydroxy-trans-cinnamate; trans-Caffeate$3-(4-Hydroxyphenyl)pyruvate	0.319422
Pyrimidine metabolism	rLC_neg_mtb_3342218	Milk	Milk::rLC_neg_mtb_3342218	303.039	256	Negative	E390	dTMP	0.28552
Glycine, serine, alanine and threonine metabolism	rLC_neg_mtb_336056	Milk	Milk::rLC_neg_mtb_336056	71.0139	41	Negative	E16	Methylglyoxal$Propenoate; Acrylic acid; Acrylate; 2-Propenoic acid; Vinylformic acid$malonic dialdehyde	-0.0034269
Pyruvate Metabolism	rLC_neg_mtb_336056	Milk	Milk::rLC_neg_mtb_336056	71.0139	41	Negative	E16	Methylglyoxal$Propenoate; Acrylic acid; Acrylate; 2-Propenoic acid; Vinylformic acid$malonic dialdehyde	-0.0034269
Glycine, serine, alanine and threonine metabolism	rLC_neg_mtb_336228	Milk	Milk::rLC_neg_mtb_336228	83.0137	48	Negative	E121	Succinate semialdehyde; Succinic semialdehyde; 4-Oxobutanoate$(S)-Methylmalonate semialdehyde$2-Methyl-3-oxopropanoate; 3-Oxo-2-methylpropanoate; Methylmalonate semialdehyde$2-Oxobutanoate$Acetoacetate	-0.0045958
Propanoate metabolism	rLC_neg_mtb_336228	Milk	Milk::rLC_neg_mtb_336228	83.0137	48	Negative	E121	Succinate semialdehyde; Succinic semialdehyde; 4-Oxobutanoate$(S)-Methylmalonate semialdehyde$2-Methyl-3-oxopropanoate; 3-Oxo-2-methylpropanoate; Methylmalonate semialdehyde$2-Oxobutanoate$Acetoacetate	-0.0045958
Tyrosine metabolism	rLC_neg_mtb_336228	Milk	Milk::rLC_neg_mtb_336228	83.0137	48	Negative	E121	Succinate semialdehyde; Succinic semialdehyde; 4-Oxobutanoate$(S)-Methylmalonate semialdehyde$2-Methyl-3-oxopropanoate; 3-Oxo-2-methylpropanoate; Methylmalonate semialdehyde$2-Oxobutanoate$Acetoacetate	-0.0045958
Bile acid biosynthesis	rLC_neg_mtb_3416431	Mother plasma	Mother plasma::rLC_neg_mtb_3416431	415.319	372	Negative	E41	7alpha,12alpha-Dihydroxycholest-4-en-3-one$Calcitriol$23S,25-dihydroxyvitamin D3$7alpha,26-Dihydroxy-4-cholesten-3-one$$$7alpha,25-Dihydroxy-4-cholesten-3-one	0.742252
Vitamin D3 (cholecalciferol) metabolism	rLC_neg_mtb_3416431	Mother plasma	Mother plasma::rLC_neg_mtb_3416431	415.319	372	Negative	E41	7alpha,12alpha-Dihydroxycholest-4-en-3-one$Calcitriol$23S,25-dihydroxyvitamin D3$7alpha,26-Dihydroxy-4-cholesten-3-one$$$7alpha,25-Dihydroxy-4-cholesten-3-one	0.742252
Linoleate metabolism	rLC_neg_mtb_3430027	Mother plasma	Mother plasma::rLC_neg_mtb_3430027	277.217	0.380267	Negative	E54	13(S)-HODE; (13S)-Hydroxyoctadecadienoic acid; (9Z, 11E)-(13S)-13-Hydroxyoctadeca-9,11-dienoic acid$12(13)-EpOME; (12R,13S)-(9Z)-12,13-Epoxyoctadecenoic acid$9(10)-EpOME; (9R,10S)-(12Z)-9,10-Epoxyoctadecenoic acid	0.574246
Omega-3 fatty acid metabolism	rLC_neg_mtb_3430027	Mother plasma	Mother plasma::rLC_neg_mtb_3430027	277.217	0.380267	Negative	E54	13(S)-HODE; (13S)-Hydroxyoctadecadienoic acid; (9Z, 11E)-(13S)-13-Hydroxyoctadeca-9,11-dienoic acid$12(13)-EpOME; (12R,13S)-(9Z)-12,13-Epoxyoctadecenoic acid$9(10)-EpOME; (9R,10S)-(12Z)-9,10-Epoxyoctadecenoic acid	0.574246
Linoleate metabolism	rLC_neg_mtb_3444922	Mother plasma	Mother plasma::rLC_neg_mtb_3444922	278.22	0.380267	Negative	E9	(6Z,9Z,12Z)-Octadecatrienoic acid; 6,9,12-Octadecatrienoic acid; gamma-Linolenic acid; Gamolenic acid$(9Z,12Z,15Z)-Octadecatrienoic acid; alpha-Linolenic acid; 9,12,15-Octadecatrienoic acid; Linolenate; alpha-Linolenate	0.5525
Omega-3 fatty acid metabolism	rLC_neg_mtb_3444922	Mother plasma	Mother plasma::rLC_neg_mtb_3444922	278.22	0.380267	Negative	E9	(6Z,9Z,12Z)-Octadecatrienoic acid; 6,9,12-Octadecatrienoic acid; gamma-Linolenic acid; Gamolenic acid$(9Z,12Z,15Z)-Octadecatrienoic acid; alpha-Linolenic acid; 9,12,15-Octadecatrienoic acid; Linolenate; alpha-Linolenate	0.5525
Ascorbate (Vitamin C) and Aldarate Metabolism	rLC_neg_mtb_3579661	Mother plasma	Mother plasma::rLC_neg_mtb_3579661	59.014	0.398867	Negative	E34	$Purine	0.310304
Butanoate metabolism	rLC_neg_mtb_3579661	Mother plasma	Mother plasma::rLC_neg_mtb_3579661	59.014	0.398867	Negative	E34	$Purine	0.310304
Glycolysis and Gluconeogenesis	rLC_neg_mtb_3579661	Mother plasma	Mother plasma::rLC_neg_mtb_3579661	59.014	0.398867	Negative	E34	$Purine	0.310304
Methionine and cysteine metabolism	rLC_neg_mtb_3579661	Mother plasma	Mother plasma::rLC_neg_mtb_3579661	59.014	0.398867	Negative	E34	$Purine	0.310304
TCA cycle	rLC_neg_mtb_3579661	Mother plasma	Mother plasma::rLC_neg_mtb_3579661	59.014	0.398867	Negative	E34	$Purine	0.310304
Glycerophospholipid metabolism	rLC_neg_mtb_3707232	Milk	Milk::rLC_neg_mtb_3707232	161.045	285	Negative	E133	D-Glucose$beta-D-Glucose$beta-D-Fructose; beta-Fruit sugar; beta-D-arabino-Hexulose; beta-Levulose; Fructose$alpha-D-Glucose$beta-D-Galactose$D-Tagatose; lyxo-Hexulose$myo-Inositol$1,7-Dimethylxanthine; Paraxanthine$$alpha-D-Galactose$D-Mannose	-0.046198
Glycerophospholipid metabolism	rLC_neg_mtb_3734217	Milk	Milk::rLC_neg_mtb_3734217	73.0296	291	Negative	E144	Glycerol	-0.012687
Glycine, serine, alanine and threonine metabolism	rLC_neg_mtb_3734217	Milk	Milk::rLC_neg_mtb_3734217	73.0296	291	Negative	E144	Glycerol	-0.012687
Propanoate metabolism	rLC_neg_mtb_3734217	Milk	Milk::rLC_neg_mtb_3734217	73.0296	291	Negative	E144	Glycerol	-0.012687
Pyruvate Metabolism	rLC_neg_mtb_3734217	Milk	Milk::rLC_neg_mtb_3734217	73.0296	291	Negative	E144	Glycerol	-0.012687
Bile acid biosynthesis	rLC_neg_mtb_3798122	Mother VAMS	Mother VAMS::rLC_neg_mtb_3798122	477.324	0.355467	Negative	E21	23S,25,26-trihydroxyvitamin D3$	0.462756
Vitamin D3 (cholecalciferol) metabolism	rLC_neg_mtb_3798122	Mother VAMS	Mother VAMS::rLC_neg_mtb_3798122	477.324	0.355467	Negative	E21	23S,25,26-trihydroxyvitamin D3$	0.462756
Bile acid biosynthesis	rLC_neg_mtb_3890022	Milk	Milk::rLC_neg_mtb_3890022	73.0296	308	Negative	E23	(R)-Lactaldehyde; D-Lactaldehyde; D-2-Hydroxypropionaldehyde$(S)-Lactaldehyde; L-Lactaldehyde; L-2-Hydroxypropionaldehyde$Hydroxyacetone; Acetol; 1-Hydroxy-2-propanone; 2-Ketopropyl alcohol; Acetone alcohol; Pyruvinalcohol; Pyruvic alcohol; Methylketol$Propionate (n-C3:0)	0.00994772
Squalene and cholesterol biosynthesis	rLC_neg_mtb_3890022	Milk	Milk::rLC_neg_mtb_3890022	73.0296	308	Negative	E23	(R)-Lactaldehyde; D-Lactaldehyde; D-2-Hydroxypropionaldehyde$(S)-Lactaldehyde; L-Lactaldehyde; L-2-Hydroxypropionaldehyde$Hydroxyacetone; Acetol; 1-Hydroxy-2-propanone; 2-Ketopropyl alcohol; Acetone alcohol; Pyruvinalcohol; Pyruvic alcohol; Methylketol$Propionate (n-C3:0)	0.00994772
Fatty acid activation	rLC_neg_mtb_3905774	Mother VAMS	Mother VAMS::rLC_neg_mtb_3905774	277.217	372	Negative	E16	(6Z,9Z,12Z)-Octadecatrienoic acid; 6,9,12-Octadecatrienoic acid; gamma-Linolenic acid; Gamolenic acid$(9Z,12Z,15Z)-Octadecatrienoic acid; alpha-Linolenic acid; 9,12,15-Octadecatrienoic acid; Linolenate; alpha-Linolenate	0.307704
Omega-3 fatty acid metabolism	rLC_neg_mtb_3905774	Mother VAMS	Mother VAMS::rLC_neg_mtb_3905774	277.217	372	Negative	E16	(6Z,9Z,12Z)-Octadecatrienoic acid; 6,9,12-Octadecatrienoic acid; gamma-Linolenic acid; Gamolenic acid$(9Z,12Z,15Z)-Octadecatrienoic acid; alpha-Linolenic acid; 9,12,15-Octadecatrienoic acid; Linolenate; alpha-Linolenate	0.307704
Fatty acid activation	rLC_neg_mtb_3905783	Mother VAMS	Mother VAMS::rLC_neg_mtb_3905783	278.221	0.367867	Negative	E16	(6Z,9Z,12Z)-Octadecatrienoic acid; 6,9,12-Octadecatrienoic acid; gamma-Linolenic acid; Gamolenic acid$(9Z,12Z,15Z)-Octadecatrienoic acid; alpha-Linolenic acid; 9,12,15-Octadecatrienoic acid; Linolenate; alpha-Linolenate	0.324958
Omega-3 fatty acid metabolism	rLC_neg_mtb_3905783	Mother VAMS	Mother VAMS::rLC_neg_mtb_3905783	278.221	0.367867	Negative	E16	(6Z,9Z,12Z)-Octadecatrienoic acid; 6,9,12-Octadecatrienoic acid; gamma-Linolenic acid; Gamolenic acid$(9Z,12Z,15Z)-Octadecatrienoic acid; alpha-Linolenic acid; 9,12,15-Octadecatrienoic acid; Linolenate; alpha-Linolenate	0.324958
Bile acid biosynthesis	rLC_neg_mtb_3907119	Mother VAMS	Mother VAMS::rLC_neg_mtb_3907119	431.315	0.363733	Negative	E21	23S,25,26-trihydroxyvitamin D3$	0.596761
Vitamin D3 (cholecalciferol) metabolism	rLC_neg_mtb_3907119	Mother VAMS	Mother VAMS::rLC_neg_mtb_3907119	431.315	0.363733	Negative	E21	23S,25,26-trihydroxyvitamin D3$	0.596761
Bile acid biosynthesis	rLC_neg_mtb_3918013	Milk	Milk::rLC_neg_mtb_3918013	195.138	287	Negative	E444	3alpha,12alpha-Dihydroxy-5beta-cholanate; Deoxycholic acid; Deoxycholate; 3alpha,12alpha-Dihydroxy-5beta-cholanic acid$Chenodeoxycholate; Chenodeoxycholic acid; 3alpha,7alpha-Dihydroxy-5beta-cholanic acid; Chenodiol	0.00674406
Bile acid biosynthesis	rLC_neg_mtb_3926780	Mother VAMS	Mother VAMS::rLC_neg_mtb_3926780	472.347	372	Negative	E21	23S,25,26-trihydroxyvitamin D3$	0.369259
Vitamin D3 (cholecalciferol) metabolism	rLC_neg_mtb_3926780	Mother VAMS	Mother VAMS::rLC_neg_mtb_3926780	472.347	372	Negative	E21	23S,25,26-trihydroxyvitamin D3$	0.369259
Di-unsaturated fatty acid beta-oxidation	rLC_neg_mtb_4012517	Mother VAMS	Mother VAMS::rLC_neg_mtb_4012517	944.245	0.3658	Negative	E37	cis,cis-3,6-Dodecadienoyl-CoA$trans,cis-Lauro-2,6-dienoyl-CoA	-0.0651636
Omega-6 fatty acid metabolism	rLC_neg_mtb_4012517	Mother VAMS	Mother VAMS::rLC_neg_mtb_4012517	944.245	0.3658	Negative	E37	cis,cis-3,6-Dodecadienoyl-CoA$trans,cis-Lauro-2,6-dienoyl-CoA	-0.0651636
Prostaglandin formation from arachidonate	rLC_neg_mtb_4052675	Mother VAMS	Mother VAMS::rLC_neg_mtb_4052675	425.257	0.388533	Negative	E40	Prostaglandin PGE2 glyceryl ester	-0.197377
Pyrimidine metabolism	rLC_neg_mtb_4093658	Milk	Milk::rLC_neg_mtb_4093658	368.986	293	Negative	E468	dUDP	0.00286641
Ascorbate (Vitamin C) and Aldarate Metabolism	rLC_neg_mtb_420155	Milk	Milk::rLC_neg_mtb_420155	147.029	66	Negative	E570	NA	0.00406856
Pyrimidine metabolism	rLC_neg_mtb_4309089	Milk	Milk::rLC_neg_mtb_4309089	386.997	304	Negative	E468	dUDP	0.00780821
Bile acid biosynthesis	rLC_neg_mtb_4412812	Milk	Milk::rLC_neg_mtb_4412812	73.0296	0.32	Negative	E23	(R)-Lactaldehyde; D-Lactaldehyde; D-2-Hydroxypropionaldehyde$(S)-Lactaldehyde; L-Lactaldehyde; L-2-Hydroxypropionaldehyde$Hydroxyacetone; Acetol; 1-Hydroxy-2-propanone; 2-Ketopropyl alcohol; Acetone alcohol; Pyruvinalcohol; Pyruvic alcohol; Methylketol$Propionate (n-C3:0)	0.0191962
Squalene and cholesterol biosynthesis	rLC_neg_mtb_4412812	Milk	Milk::rLC_neg_mtb_4412812	73.0296	0.32	Negative	E23	(R)-Lactaldehyde; D-Lactaldehyde; D-2-Hydroxypropionaldehyde$(S)-Lactaldehyde; L-Lactaldehyde; L-2-Hydroxypropionaldehyde$Hydroxyacetone; Acetol; 1-Hydroxy-2-propanone; 2-Ketopropyl alcohol; Acetone alcohol; Pyruvinalcohol; Pyruvic alcohol; Methylketol$Propionate (n-C3:0)	0.0191962
Arachidonic acid metabolism	rLC_neg_mtb_4429280	Mother VAMS	Mother VAMS::rLC_neg_mtb_4429280	337.235	0.4712	Negative	E43	11,12-DHET$14,15-DHET; (5Z,8Z,11Z)-14,15-Dihydroxyeicosa-5,8,11-trienoic acid; (5Z,8Z,11Z)-14,15-Dihydroxyicosa-5,8,11-trienoic acid$5,6-DHET; (8Z,11Z,14Z)-5,6-Dihydroxyeicosa-8,11,14-trienoic acid; (8Z,11Z,14Z)-5,6-Dihydroxyicosa-8,11,14-trienoic acid$8,9-DHET; (5Z,11Z,14Z)-8,9-Dihydroxyeicosa-5,11,14-trienoic acid; (5Z,11Z,14Z)-8,9-Dihydroxyicosa-5,11,14-trienoic acid	-0.475947
Squalene and cholesterol biosynthesis	rLC_neg_mtb_4497083	Milk	Milk::rLC_neg_mtb_4497083	73.0296	343	Negative	E34	(R)-Mevalonate	0.0160577
Pyrimidine metabolism	rLC_neg_mtb_4498232	Milk	Milk::rLC_neg_mtb_4498232	161.045	347	Negative	E530	Succinate semialdehyde; Succinic semialdehyde; 4-Oxobutanoate$(S)-Methylmalonate semialdehyde$2-Methyl-3-oxopropanoate; 3-Oxo-2-methylpropanoate; Methylmalonate semialdehyde$2-Oxobutanoate$Acetoacetate	0.451997
Squalene and cholesterol biosynthesis	rLC_neg_mtb_4498232	Milk	Milk::rLC_neg_mtb_4498232	161.045	347	Negative	E530	Succinate semialdehyde; Succinic semialdehyde; 4-Oxobutanoate$(S)-Methylmalonate semialdehyde$2-Methyl-3-oxopropanoate; 3-Oxo-2-methylpropanoate; Methylmalonate semialdehyde$2-Oxobutanoate$Acetoacetate	0.451997
Leukotriene metabolism	rLC_neg_mtb_4563799	Milk	Milk::rLC_neg_mtb_4563799	365.195	341	Negative	E313	20-COOH-10,11-dihydro-LTB4	0.00599426
Sialic acid metabolism	rLC_neg_mtb_4592408	Mother VAMS	Mother VAMS::rLC_neg_mtb_4592408	834.531	0.425733	Negative	E56	Phosphatidylserine	-0.0487511
Carnitine shuttle	rLC_neg_mtb_4609819	Mother VAMS	Mother VAMS::rLC_neg_mtb_4609819	538.484	0.444333	Negative	E57	hexacosanoyl carnitine	-0.310754
Squalene and cholesterol biosynthesis	rLC_neg_mtb_4641286	Milk	Milk::rLC_neg_mtb_4641286	73.0296	358	Negative	E34	(R)-Mevalonate	0.0113769
Pyrimidine metabolism	rLC_neg_mtb_4678630	Milk	Milk::rLC_neg_mtb_4678630	83.0137	347	Negative	E530	Succinate semialdehyde; Succinic semialdehyde; 4-Oxobutanoate$(S)-Methylmalonate semialdehyde$2-Methyl-3-oxopropanoate; 3-Oxo-2-methylpropanoate; Methylmalonate semialdehyde$2-Oxobutanoate$Acetoacetate	0.00713133
Squalene and cholesterol biosynthesis	rLC_neg_mtb_4678630	Milk	Milk::rLC_neg_mtb_4678630	83.0137	347	Negative	E530	Succinate semialdehyde; Succinic semialdehyde; 4-Oxobutanoate$(S)-Methylmalonate semialdehyde$2-Methyl-3-oxopropanoate; 3-Oxo-2-methylpropanoate; Methylmalonate semialdehyde$2-Oxobutanoate$Acetoacetate	0.00713133
Purine metabolism	rLC_neg_mtb_4698985	Mother VAMS	Mother VAMS::rLC_neg_mtb_4698985	305.048	0.462933	Negative	E51	Inosine	-0.48158
Ascorbate (Vitamin C) and Aldarate Metabolism	rLC_neg_mtb_4730885	Milk	Milk::rLC_neg_mtb_4730885	59.014	355	Negative	E748	NA	0.00792144
Ascorbate (Vitamin C) and Aldarate Metabolism	rLC_neg_mtb_4732530	Milk	Milk::rLC_neg_mtb_4732530	135.029	358	Negative	E569	NA	0.00959256
Ascorbate (Vitamin C) and Aldarate Metabolism	rLC_neg_mtb_4734193	Milk	Milk::rLC_neg_mtb_4734193	214.182	362	Negative	E589	alpha-Tocopherol; Vitamin E	0.00210694
Linoleate metabolism	rLC_neg_mtb_4735797	Milk	Milk::rLC_neg_mtb_4735797	295.228	351	Negative	E154	13(S)-HODE; (13S)-Hydroxyoctadecadienoic acid; (9Z, 11E)-(13S)-13-Hydroxyoctadeca-9,11-dienoic acid$12(13)-EpOME; (12R,13S)-(9Z)-12,13-Epoxyoctadecenoic acid$9(10)-EpOME; (9R,10S)-(12Z)-9,10-Epoxyoctadecenoic acid	-0.252137
Linoleate metabolism	rLC_neg_mtb_4735821	Milk	Milk::rLC_neg_mtb_4735821	296.231	349	Negative	E154	13(S)-HODE; (13S)-Hydroxyoctadecadienoic acid; (9Z, 11E)-(13S)-13-Hydroxyoctadeca-9,11-dienoic acid$12(13)-EpOME; (12R,13S)-(9Z)-12,13-Epoxyoctadecenoic acid$9(10)-EpOME; (9R,10S)-(12Z)-9,10-Epoxyoctadecenoic acid	-0.486508
Ascorbate (Vitamin C) and Aldarate Metabolism	rLC_neg_mtb_478009	Milk	Milk::rLC_neg_mtb_478009	88.9878	48	Negative	E596	Oxalate; Oxalic acid; Ethanedioic acid	0.00550571
Linoleate metabolism	rLC_neg_mtb_4797449	Milk	Milk::rLC_neg_mtb_4797449	331.206	358	Negative	E154	13(S)-HODE; (13S)-Hydroxyoctadecadienoic acid; (9Z, 11E)-(13S)-13-Hydroxyoctadeca-9,11-dienoic acid$12(13)-EpOME; (12R,13S)-(9Z)-12,13-Epoxyoctadecenoic acid$9(10)-EpOME; (9R,10S)-(12Z)-9,10-Epoxyoctadecenoic acid	-0.0138766
Ascorbate (Vitamin C) and Aldarate Metabolism	rLC_neg_mtb_4821521	Milk	Milk::rLC_neg_mtb_4821521	191.019	353	Negative	E305	Citrate$$Isocitrate	0.00792144
Ascorbate (Vitamin C) and Aldarate Metabolism	rLC_neg_mtb_4822322	Milk	Milk::rLC_neg_mtb_4822322	232.047	364	Negative	E305	Citrate$$Isocitrate	0.00792144
Squalene and cholesterol biosynthesis	rLC_neg_mtb_4904390	Milk	Milk::rLC_neg_mtb_4904390	129.055	308	Negative	E33	(R)-Mevalonate	0.00581202
Ascorbate (Vitamin C) and Aldarate Metabolism	rLC_neg_mtb_4983002	Milk	Milk::rLC_neg_mtb_4983002	59.014	372	Negative	E748	NA	0.00792144
Ascorbate (Vitamin C) and Aldarate Metabolism	rLC_neg_mtb_5039533	Milk	Milk::rLC_neg_mtb_5039533	179.055	349	Negative	E748	NA	0.0033828
Bile acid biosynthesis	rLC_neg_mtb_5043614	Milk	Milk::rLC_neg_mtb_5043614	464.288	0.38	Negative	E173	Taurolithocholate; Taurolithocholic acid	0.0160611
Purine metabolism	rLC_neg_mtb_5079268	Mother VAMS	Mother VAMS::rLC_neg_mtb_5079268	249.062	0.4712	Negative	E51	Inosine	-0.58786
Squalene and cholesterol biosynthesis	rLC_neg_mtb_5086074	Milk	Milk::rLC_neg_mtb_5086074	226.994	366	Negative	E34	(R)-Mevalonate	0.00469552
Ascorbate (Vitamin C) and Aldarate Metabolism	rLC_neg_mtb_5110878	Milk	Milk::rLC_neg_mtb_5110878	59.0139	384	Negative	E748	NA	0.00792144
Linoleate metabolism	rLC_neg_mtb_5112989	Milk	Milk::rLC_neg_mtb_5112989	187.097	0.38	Negative	E113	NA	-0.00304565
Androgen and estrogen biosynthesis and metabolism	rLC_neg_mtb_5117326	Milk	Milk::rLC_neg_mtb_5117326	493.207	372	Negative	E114	2-Methoxy-estradiol-17beta 3-glucuronide	-0.00810852
Leukotriene metabolism	rLC_neg_mtb_5140231	Milk	Milk::rLC_neg_mtb_5140231	303.233	0.38	Negative	E669	arachidonic acid	0.00804026
Omega-6 fatty acid metabolism	rLC_neg_mtb_5140231	Milk	Milk::rLC_neg_mtb_5140231	303.233	0.38	Negative	E669	arachidonic acid	0.00804026
Androgen and estrogen biosynthesis and metabolism	rLC_neg_mtb_5143528	Milk	Milk::rLC_neg_mtb_5143528	459.206	368	Negative	E114	2-Methoxy-estradiol-17beta 3-glucuronide	-0.0229588
Androgen and estrogen biosynthesis and metabolism	rLC_neg_mtb_5173301	Milk	Milk::rLC_neg_mtb_5173301	486.225	374	Negative	E115	androsterone glucuronide$androsterone glucuronide$Etiocholan-3alpha-ol-17-one 3-glucuronide$5alpha-Dihydrotestosterone glucuronide$Etiocholan-3alpha-ol-17-one 3-glucuronide	-0.00602337
C21-steroid hormone biosynthesis and metabolism	rLC_neg_mtb_5173301	Milk	Milk::rLC_neg_mtb_5173301	486.225	374	Negative	E115	androsterone glucuronide$androsterone glucuronide$Etiocholan-3alpha-ol-17-one 3-glucuronide$5alpha-Dihydrotestosterone glucuronide$Etiocholan-3alpha-ol-17-one 3-glucuronide	-0.00602337
C21-steroid hormone biosynthesis and metabolism	rLC_neg_mtb_5252330	Milk	Milk::rLC_neg_mtb_5252330	317.247	389	Negative	E169	allopregnanolone$3alpha-Hydroxy-5beta-pregnane-20-one	-0.00993469
C21-steroid hormone biosynthesis and metabolism	rLC_neg_mtb_5274971	Milk	Milk::rLC_neg_mtb_5274971	318.252	384	Negative	E169	allopregnanolone$3alpha-Hydroxy-5beta-pregnane-20-one	-0.00451434
Androgen and estrogen biosynthesis and metabolism	rLC_neg_mtb_5353460	Milk	Milk::rLC_neg_mtb_5353460	465.247	0.38	Negative	E115	androsterone glucuronide$androsterone glucuronide$Etiocholan-3alpha-ol-17-one 3-glucuronide$5alpha-Dihydrotestosterone glucuronide$Etiocholan-3alpha-ol-17-one 3-glucuronide	-0.00466873
C21-steroid hormone biosynthesis and metabolism	rLC_neg_mtb_5353460	Milk	Milk::rLC_neg_mtb_5353460	465.247	0.38	Negative	E115	androsterone glucuronide$androsterone glucuronide$Etiocholan-3alpha-ol-17-one 3-glucuronide$5alpha-Dihydrotestosterone glucuronide$Etiocholan-3alpha-ol-17-one 3-glucuronide	-0.00466873
Ascorbate (Vitamin C) and Aldarate Metabolism	rLC_neg_mtb_5372960	Milk	Milk::rLC_neg_mtb_5372960	59.014	399	Negative	E748	NA	0.00792144
Androgen and estrogen biosynthesis and metabolism	rLC_neg_mtb_5431451	Milk	Milk::rLC_neg_mtb_5431451	465.253	405	Negative	E116	androsterone glucuronide$androsterone glucuronide$Etiocholan-3alpha-ol-17-one 3-glucuronide$5alpha-Dihydrotestosterone glucuronide$Etiocholan-3alpha-ol-17-one 3-glucuronide	-0.0157873
C21-steroid hormone biosynthesis and metabolism	rLC_neg_mtb_5431451	Milk	Milk::rLC_neg_mtb_5431451	465.253	405	Negative	E116	androsterone glucuronide$androsterone glucuronide$Etiocholan-3alpha-ol-17-one 3-glucuronide$5alpha-Dihydrotestosterone glucuronide$Etiocholan-3alpha-ol-17-one 3-glucuronide	-0.0157873
Porphyrin metabolism	rLC_neg_mtb_5435198	Milk	Milk::rLC_neg_mtb_5435198	630.333	399	Negative	E204	D-Urobilinogen	-0.00299668
Porphyrin metabolism	rLC_neg_mtb_5489519	Milk	Milk::rLC_neg_mtb_5489519	571.295	397	Negative	E204	D-Urobilinogen	-0.00566862
Pyrimidine metabolism	rLC_neg_mtb_5568320	Milk	Milk::rLC_neg_mtb_5568320	226.994	413	Negative	E652	Phosphoenolpyruvate	0.00456493
Ascorbate (Vitamin C) and Aldarate Metabolism	rLC_neg_mtb_5619255	Milk	Milk::rLC_neg_mtb_5619255	101.024	405	Negative	E748	NA	0.0195184
Pyrimidine metabolism	rLC_neg_mtb_5647756	Milk	Milk::rLC_neg_mtb_5647756	166.974	426	Negative	E652	Phosphoenolpyruvate	0.00616507
Ascorbate (Vitamin C) and Aldarate Metabolism	rLC_neg_mtb_5730610	Milk	Milk::rLC_neg_mtb_5730610	59.014	422	Negative	E749	NA	0.00792144
Ascorbate (Vitamin C) and Aldarate Metabolism	rLC_neg_mtb_5787003	Milk	Milk::rLC_neg_mtb_5787003	101.024	422	Negative	E749	NA	0.0208636
Glycerophospholipid metabolism	rLC_neg_mtb_5967022	Milk	Milk::rLC_neg_mtb_5967022	712.486	453	Negative	E215	1-alkenyl 2-acylglycerol 3-phosphoethanolamine plasmalogen	-0.0139447
Ascorbate (Vitamin C) and Aldarate Metabolism	rLC_neg_mtb_6041991	Milk	Milk::rLC_neg_mtb_6041991	191.02	457	Negative	E116	D-glucurono-6,3-lactone$L-Ascorbate$D-glucurono-6,3-lactone	0.00804026
Glycerophospholipid metabolism	rLC_neg_mtb_6054725	Milk	Milk::rLC_neg_mtb_6054725	656.504	446	Negative	E215	1-alkenyl 2-acylglycerol 3-phosphoethanolamine plasmalogen	-0.00251244
Glycerophospholipid metabolism	rLC_neg_mtb_6089840	Milk	Milk::rLC_neg_mtb_6089840	734.534	448	Negative	E215	1-alkenyl 2-acylglycerol 3-phosphoethanolamine plasmalogen	-0.00701357
Glycerophospholipid metabolism	rLC_neg_mtb_6090172	Milk	Milk::rLC_neg_mtb_6090172	756.436	446	Negative	E215	1-alkenyl 2-acylglycerol 3-phosphoethanolamine plasmalogen	-0.0145732
Squalene and cholesterol biosynthesis	rLC_neg_mtb_6110043	Milk	Milk::rLC_neg_mtb_6110043	334.037	457	Negative	E760	Geranyl diphosphate	0.00311604
Squalene and cholesterol biosynthesis	rLC_neg_mtb_6178855	Milk	Milk::rLC_neg_mtb_6178855	313.062	451	Negative	E760	Geranyl diphosphate	0.00286101
Ascorbate (Vitamin C) and Aldarate Metabolism	rLC_neg_mtb_6200040	Milk	Milk::rLC_neg_mtb_6200040	88.9875	457	Negative	E598	Oxalate; Oxalic acid; Ethanedioic acid	0.00364801
Ascorbate (Vitamin C) and Aldarate Metabolism	rLC_neg_mtb_6235024	Milk	Milk::rLC_neg_mtb_6235024	87.0082	457	Negative	E116	D-glucurono-6,3-lactone$L-Ascorbate$D-glucurono-6,3-lactone	0.0108788
Pyrimidine metabolism	rLC_neg_mtb_6235024	Milk	Milk::rLC_neg_mtb_6235024	87.0082	457	Negative	E116	D-glucurono-6,3-lactone$L-Ascorbate$D-glucurono-6,3-lactone	0.0108788
Ascorbate (Vitamin C) and Aldarate Metabolism	rLC_neg_mtb_672612	Milk	Milk::rLC_neg_mtb_672612	154.998	52	Negative	E832	Dehydroascorbate$cis-Aconitate; cis-Aconitic acid	0.00757683
Bile acid biosynthesis	rLC_neg_mtb_7107024	Milk	Milk::rLC_neg_mtb_7107024	346.057	517	Negative	E851	AMP$dGMP	0.6626
Leukotriene metabolism	rLC_neg_mtb_7107024	Milk	Milk::rLC_neg_mtb_7107024	346.057	517	Negative	E851	AMP$dGMP	0.6626
Omega-6 fatty acid metabolism	rLC_neg_mtb_7107024	Milk	Milk::rLC_neg_mtb_7107024	346.057	517	Negative	E851	AMP$dGMP	0.6626
Pyrimidine metabolism	rLC_neg_mtb_7107024	Milk	Milk::rLC_neg_mtb_7107024	346.057	517	Negative	E851	AMP$dGMP	0.6626
Blood Group Biosynthesis	rLC_neg_mtb_711927	Mother plasma	Mother plasma::rLC_neg_mtb_711927	322.044	0.0950667	Negative	E137	CMP	0.921318
Glycerophospholipid metabolism	rLC_neg_mtb_711927	Mother plasma	Mother plasma::rLC_neg_mtb_711927	322.044	0.0950667	Negative	E137	CMP	0.921318
Glycosphingolipid biosynthesis - globoseries	rLC_neg_mtb_711927	Mother plasma	Mother plasma::rLC_neg_mtb_711927	322.044	0.0950667	Negative	E137	CMP	0.921318
Glycosphingolipid biosynthesis - lactoseries	rLC_neg_mtb_711927	Mother plasma	Mother plasma::rLC_neg_mtb_711927	322.044	0.0950667	Negative	E137	CMP	0.921318
Glycosphingolipid biosynthesis - neolactoseries	rLC_neg_mtb_711927	Mother plasma	Mother plasma::rLC_neg_mtb_711927	322.044	0.0950667	Negative	E137	CMP	0.921318
Glycosphingolipid metabolism	rLC_neg_mtb_711927	Mother plasma	Mother plasma::rLC_neg_mtb_711927	322.044	0.0950667	Negative	E137	CMP	0.921318
Keratan sulfate biosynthesis	rLC_neg_mtb_711927	Mother plasma	Mother plasma::rLC_neg_mtb_711927	322.044	0.0950667	Negative	E137	CMP	0.921318
N-Glycan biosynthesis	rLC_neg_mtb_711927	Mother plasma	Mother plasma::rLC_neg_mtb_711927	322.044	0.0950667	Negative	E137	CMP	0.921318
O-Glycan biosynthesis	rLC_neg_mtb_711927	Mother plasma	Mother plasma::rLC_neg_mtb_711927	322.044	0.0950667	Negative	E137	CMP	0.921318
Bile acid biosynthesis	rLC_neg_mtb_7374230	Milk	Milk::rLC_neg_mtb_7374230	346.058	587	Negative	E853	AMP$dGMP	0.00489451
Leukotriene metabolism	rLC_neg_mtb_7374230	Milk	Milk::rLC_neg_mtb_7374230	346.058	587	Negative	E853	AMP$dGMP	0.00489451
Omega-6 fatty acid metabolism	rLC_neg_mtb_7374230	Milk	Milk::rLC_neg_mtb_7374230	346.058	587	Negative	E853	AMP$dGMP	0.00489451
Pyrimidine metabolism	rLC_neg_mtb_7374230	Milk	Milk::rLC_neg_mtb_7374230	346.058	587	Negative	E853	AMP$dGMP	0.00489451
C5-Branched dibasic acid metabolism	rLC_neg_mtb_754891	Mother plasma	Mother plasma::rLC_neg_mtb_754891	111.009	0.0971333	Negative	E95	Mesaconate; 2-Methylfumarate; Mesaconic acid; Methylfumaric acid$Itaconate; Itaconic acid; Methylenesuccinic acid	0.674532
Ascorbate (Vitamin C) and Aldarate Metabolism	rLC_neg_mtb_7550034	Milk	Milk::rLC_neg_mtb_7550034	59.014	558	Negative	E754	NA	0.00792144
Aspartate and asparagine metabolism	rLC_neg_mtb_756474	Mother plasma	Mother plasma::rLC_neg_mtb_756474	188.055	0.113667	Negative	E72	(S)-2-Hydroxyglutarate$(R)-2-Hydroxyglutarate$(S)-2-Hydroxyglutarate$	0.71725
Blood Group Biosynthesis	rLC_neg_mtb_758813	Mother plasma	Mother plasma::rLC_neg_mtb_758813	304.034	0.0992	Negative	E137	CMP	0.920885
Glycerophospholipid metabolism	rLC_neg_mtb_758813	Mother plasma	Mother plasma::rLC_neg_mtb_758813	304.034	0.0992	Negative	E137	CMP	0.920885
Glycosphingolipid biosynthesis - globoseries	rLC_neg_mtb_758813	Mother plasma	Mother plasma::rLC_neg_mtb_758813	304.034	0.0992	Negative	E137	CMP	0.920885
Glycosphingolipid biosynthesis - lactoseries	rLC_neg_mtb_758813	Mother plasma	Mother plasma::rLC_neg_mtb_758813	304.034	0.0992	Negative	E137	CMP	0.920885
Glycosphingolipid biosynthesis - neolactoseries	rLC_neg_mtb_758813	Mother plasma	Mother plasma::rLC_neg_mtb_758813	304.034	0.0992	Negative	E137	CMP	0.920885
Glycosphingolipid metabolism	rLC_neg_mtb_758813	Mother plasma	Mother plasma::rLC_neg_mtb_758813	304.034	0.0992	Negative	E137	CMP	0.920885
Keratan sulfate biosynthesis	rLC_neg_mtb_758813	Mother plasma	Mother plasma::rLC_neg_mtb_758813	304.034	0.0992	Negative	E137	CMP	0.920885
N-Glycan biosynthesis	rLC_neg_mtb_758813	Mother plasma	Mother plasma::rLC_neg_mtb_758813	304.034	0.0992	Negative	E137	CMP	0.920885
O-Glycan biosynthesis	rLC_neg_mtb_758813	Mother plasma	Mother plasma::rLC_neg_mtb_758813	304.034	0.0992	Negative	E137	CMP	0.920885
Ascorbate (Vitamin C) and Aldarate Metabolism	rLC_neg_mtb_7589589	Milk	Milk::rLC_neg_mtb_7589589	87.0088	562	Negative	E105	D-glucurono-6,3-lactone$L-Ascorbate$D-glucurono-6,3-lactone	0.722865
Ascorbate (Vitamin C) and Aldarate Metabolism	rLC_neg_mtb_7621296	Milk	Milk::rLC_neg_mtb_7621296	119.034	568	Negative	E754	NA	0.0135186
Glycerophospholipid metabolism	rLC_neg_mtb_7621859	Milk	Milk::rLC_neg_mtb_7621859	142.991	572	Negative	E14	(R)-Glycerate	-0.00746209
Glycine, serine, alanine and threonine metabolism	rLC_neg_mtb_7621859	Milk	Milk::rLC_neg_mtb_7621859	142.991	572	Negative	E14	(R)-Glycerate	-0.00746209
Glyoxylate and Dicarboxylate Metabolism	rLC_neg_mtb_7621859	Milk	Milk::rLC_neg_mtb_7621859	142.991	572	Negative	E14	(R)-Glycerate	-0.00746209
Ascorbate (Vitamin C) and Aldarate Metabolism	rLC_neg_mtb_7622954	Milk	Milk::rLC_neg_mtb_7622954	191.02	558	Negative	E105	D-glucurono-6,3-lactone$L-Ascorbate$D-glucurono-6,3-lactone	0.00792144
Glycerophospholipid metabolism	rLC_neg_mtb_7665707	Milk	Milk::rLC_neg_mtb_7665707	834.522	562	Negative	E238	Phosphatidylserine	-0.0217814
Glycerophospholipid metabolism	rLC_neg_mtb_7666441	Milk	Milk::rLC_neg_mtb_7666441	880.527	0.56	Negative	E238	Phosphatidylserine	-0.0143544
Ascorbate (Vitamin C) and Aldarate Metabolism	rLC_neg_mtb_7683521	Milk	Milk::rLC_neg_mtb_7683521	247.004	564	Negative	E939	D-Glucarate	0.00539143
Glycerophospholipid metabolism	rLC_neg_mtb_7696603	Milk	Milk::rLC_neg_mtb_7696603	880.531	0.57	Negative	E238	Phosphatidylserine	-0.0101781
Ascorbate (Vitamin C) and Aldarate Metabolism	rLC_neg_mtb_775859	Milk	Milk::rLC_neg_mtb_775859	87.0081	62	Negative	E1	D-glucurono-6,3-lactone$L-Ascorbate$D-glucurono-6,3-lactone	-0.01068
C5-Branched dibasic acid metabolism	rLC_neg_mtb_775859	Milk	Milk::rLC_neg_mtb_775859	87.0081	62	Negative	E1	D-glucurono-6,3-lactone$L-Ascorbate$D-glucurono-6,3-lactone	-0.01068
D4&E4-neuroprostanes formation	rLC_neg_mtb_775859	Milk	Milk::rLC_neg_mtb_775859	87.0081	62	Negative	E1	D-glucurono-6,3-lactone$L-Ascorbate$D-glucurono-6,3-lactone	-0.01068
Glycerophospholipid metabolism	rLC_neg_mtb_775859	Milk	Milk::rLC_neg_mtb_775859	87.0081	62	Negative	E1	D-glucurono-6,3-lactone$L-Ascorbate$D-glucurono-6,3-lactone	-0.01068
Glycine, serine, alanine and threonine metabolism	rLC_neg_mtb_775859	Milk	Milk::rLC_neg_mtb_775859	87.0081	62	Negative	E1	D-glucurono-6,3-lactone$L-Ascorbate$D-glucurono-6,3-lactone	-0.01068
Glyoxylate and Dicarboxylate Metabolism	rLC_neg_mtb_775859	Milk	Milk::rLC_neg_mtb_775859	87.0081	62	Negative	E1	D-glucurono-6,3-lactone$L-Ascorbate$D-glucurono-6,3-lactone	-0.01068
Porphyrin metabolism	rLC_neg_mtb_775859	Milk	Milk::rLC_neg_mtb_775859	87.0081	62	Negative	E1	D-glucurono-6,3-lactone$L-Ascorbate$D-glucurono-6,3-lactone	-0.01068
Propanoate metabolism	rLC_neg_mtb_775859	Milk	Milk::rLC_neg_mtb_775859	87.0081	62	Negative	E1	D-glucurono-6,3-lactone$L-Ascorbate$D-glucurono-6,3-lactone	-0.01068
Purine metabolism	rLC_neg_mtb_775859	Milk	Milk::rLC_neg_mtb_775859	87.0081	62	Negative	E1	D-glucurono-6,3-lactone$L-Ascorbate$D-glucurono-6,3-lactone	-0.01068
Pyruvate Metabolism	rLC_neg_mtb_775859	Milk	Milk::rLC_neg_mtb_775859	87.0081	62	Negative	E1	D-glucurono-6,3-lactone$L-Ascorbate$D-glucurono-6,3-lactone	-0.01068
Tyrosine metabolism	rLC_neg_mtb_775859	Milk	Milk::rLC_neg_mtb_775859	87.0081	62	Negative	E1	D-glucurono-6,3-lactone$L-Ascorbate$D-glucurono-6,3-lactone	-0.01068
Aspartate and asparagine metabolism	rLC_neg_mtb_782365	Mother plasma	Mother plasma::rLC_neg_mtb_782365	148.033	0.121933	Negative	E72	(S)-2-Hydroxyglutarate$(R)-2-Hydroxyglutarate$(S)-2-Hydroxyglutarate$	0.618337
Ascorbate (Vitamin C) and Aldarate Metabolism	rLC_neg_mtb_7831986	Milk	Milk::rLC_neg_mtb_7831986	179.056	581	Negative	E580	NA	0.00673565
Ascorbate (Vitamin C) and Aldarate Metabolism	rLC_neg_mtb_8104331	Milk	Milk::rLC_neg_mtb_8104331	59.014	581	Negative	E754	NA	0.00792144
Ascorbate (Vitamin C) and Aldarate Metabolism	rLC_neg_mtb_8139918	Milk	Milk::rLC_neg_mtb_8139918	87.0087	595	Negative	E105	D-glucurono-6,3-lactone$L-Ascorbate$D-glucurono-6,3-lactone	0.00830554
C5-Branched dibasic acid metabolism	rLC_neg_mtb_821559	Mother plasma	Mother plasma::rLC_neg_mtb_821559	87.0088	0.1116	Negative	E81	Pyruvate$3-Oxopropanoate; Malonate semialdehyde	0.703161
Glycerophospholipid metabolism	rLC_neg_mtb_821559	Mother plasma	Mother plasma::rLC_neg_mtb_821559	87.0088	0.1116	Negative	E81	Pyruvate$3-Oxopropanoate; Malonate semialdehyde	0.703161
Butanoate metabolism	rLC_neg_mtb_821934	Mother plasma	Mother plasma::rLC_neg_mtb_821934	113.024	0.1798	Negative	E43	2-Acetolactate$(S)-2-Acetolactate; (S)-2-Hydroxy-2-methyl-3-oxobutanoate	0.0748557
Glycolysis and Gluconeogenesis	rLC_neg_mtb_821934	Mother plasma	Mother plasma::rLC_neg_mtb_821934	113.024	0.1798	Negative	E43	2-Acetolactate$(S)-2-Acetolactate; (S)-2-Hydroxy-2-methyl-3-oxobutanoate	0.0748557
Aspartate and asparagine metabolism	rLC_neg_mtb_822170	Mother plasma	Mother plasma::rLC_neg_mtb_822170	129.019	0.113667	Negative	E72	(S)-2-Hydroxyglutarate$(R)-2-Hydroxyglutarate$(S)-2-Hydroxyglutarate$	0.783734
C5-Branched dibasic acid metabolism	rLC_neg_mtb_822170	Mother plasma	Mother plasma::rLC_neg_mtb_822170	129.019	0.113667	Negative	E72	(S)-2-Hydroxyglutarate$(R)-2-Hydroxyglutarate$(S)-2-Hydroxyglutarate$	0.783734
Ascorbate (Vitamin C) and Aldarate Metabolism	rLC_neg_mtb_8270340	Milk	Milk::rLC_neg_mtb_8270340	135.029	601	Negative	E570	NA	0.00519417
C5-Branched dibasic acid metabolism	rLC_neg_mtb_844026	Mother plasma	Mother plasma::rLC_neg_mtb_844026	111.008	0.121933	Negative	E95	Mesaconate; 2-Methylfumarate; Mesaconic acid; Methylfumaric acid$Itaconate; Itaconic acid; Methylenesuccinic acid	0.93971
Aspartate and asparagine metabolism	rLC_neg_mtb_844638	Mother plasma	Mother plasma::rLC_neg_mtb_844638	147.03	0.1178	Negative	E72	(S)-2-Hydroxyglutarate$(R)-2-Hydroxyglutarate$(S)-2-Hydroxyglutarate$	0.817546
C5-Branched dibasic acid metabolism	rLC_neg_mtb_844638	Mother plasma	Mother plasma::rLC_neg_mtb_844638	147.03	0.1178	Negative	E72	(S)-2-Hydroxyglutarate$(R)-2-Hydroxyglutarate$(S)-2-Hydroxyglutarate$	0.817546
Glycerophospholipid metabolism	rLC_neg_mtb_844638	Mother plasma	Mother plasma::rLC_neg_mtb_844638	147.03	0.1178	Negative	E72	(S)-2-Hydroxyglutarate$(R)-2-Hydroxyglutarate$(S)-2-Hydroxyglutarate$	0.817546
Ascorbate (Vitamin C) and Aldarate Metabolism	rLC_neg_mtb_8567040	Milk	Milk::rLC_neg_mtb_8567040	101.024	626	Negative	E580	NA	0.192904
Bile acid biosynthesis	rLC_neg_mtb_8667793	Milk	Milk::rLC_neg_mtb_8667793	73.0296	0.62	Negative	E29	(R)-Lactaldehyde; D-Lactaldehyde; D-2-Hydroxypropionaldehyde$(S)-Lactaldehyde; L-Lactaldehyde; L-2-Hydroxypropionaldehyde$Hydroxyacetone; Acetol; 1-Hydroxy-2-propanone; 2-Ketopropyl alcohol; Acetone alcohol; Pyruvinalcohol; Pyruvic alcohol; Methylketol$Propionate (n-C3:0)	0.013061
Squalene and cholesterol biosynthesis	rLC_neg_mtb_8667793	Milk	Milk::rLC_neg_mtb_8667793	73.0296	0.62	Negative	E29	(R)-Lactaldehyde; D-Lactaldehyde; D-2-Hydroxypropionaldehyde$(S)-Lactaldehyde; L-Lactaldehyde; L-2-Hydroxypropionaldehyde$Hydroxyacetone; Acetol; 1-Hydroxy-2-propanone; 2-Ketopropyl alcohol; Acetone alcohol; Pyruvinalcohol; Pyruvic alcohol; Methylketol$Propionate (n-C3:0)	0.013061
Ascorbate (Vitamin C) and Aldarate Metabolism	rLC_neg_mtb_8698945	Milk	Milk::rLC_neg_mtb_8698945	59.0141	626	Negative	E754	NA	0.00792144
Ascorbate (Vitamin C) and Aldarate Metabolism	rLC_neg_mtb_8828797	Milk	Milk::rLC_neg_mtb_8828797	87.009	628	Negative	E105	D-glucurono-6,3-lactone$L-Ascorbate$D-glucurono-6,3-lactone	0.00898156
Glycerophospholipid metabolism	rLC_neg_mtb_8830089	Milk	Milk::rLC_neg_mtb_8830089	146.046	643	Negative	E14	(R)-Glycerate	-0.403267
Glycine, serine, alanine and threonine metabolism	rLC_neg_mtb_8830089	Milk	Milk::rLC_neg_mtb_8830089	146.046	643	Negative	E14	(R)-Glycerate	-0.403267
Glyoxylate and Dicarboxylate Metabolism	rLC_neg_mtb_8830089	Milk	Milk::rLC_neg_mtb_8830089	146.046	643	Negative	E14	(R)-Glycerate	-0.403267
Aspartate and asparagine metabolism	rLC_neg_mtb_890644	Mother plasma	Mother plasma::rLC_neg_mtb_890644	85.0294	0.115733	Negative	E115	2-Hydroxybutyrate$(R)-3-Hydroxybutanoate; (R)-3-Hydroxybutanoic acid; (R)-3-Hydroxybutyric acid$(S)-3-Hydroxybutanoate$(S)-3-Hydroxyisobutyrate$4-Hydroxybutanoic acid; 4-Hydroxybutanoate; 4-Hydroxybutyric acid	0.830032
C5-Branched dibasic acid metabolism	rLC_neg_mtb_891422	Mother plasma	Mother plasma::rLC_neg_mtb_891422	128.035	0.126067	Negative	E81	Pyruvate$3-Oxopropanoate; Malonate semialdehyde	0.459221
Glycerophospholipid metabolism	rLC_neg_mtb_891422	Mother plasma	Mother plasma::rLC_neg_mtb_891422	128.035	0.126067	Negative	E81	Pyruvate$3-Oxopropanoate; Malonate semialdehyde	0.459221
C5-Branched dibasic acid metabolism	rLC_neg_mtb_891456	Mother plasma	Mother plasma::rLC_neg_mtb_891456	130.022	0.1116	Negative	E95	Mesaconate; 2-Methylfumarate; Mesaconic acid; Methylfumaric acid$Itaconate; Itaconic acid; Methylenesuccinic acid	0.809231
Ascorbate (Vitamin C) and Aldarate Metabolism	rLC_neg_mtb_8996583	Milk	Milk::rLC_neg_mtb_8996583	59.0141	643	Negative	E754	NA	0.00792144
Ascorbate (Vitamin C) and Aldarate Metabolism	rLC_neg_mtb_9030522	Milk	Milk::rLC_neg_mtb_9030522	191.019	637	Negative	E105	D-glucurono-6,3-lactone$L-Ascorbate$D-glucurono-6,3-lactone	0.0171348
Alkaloid biosynthesis II	rLC_neg_mtb_910013	Mother plasma	Mother plasma::rLC_neg_mtb_910013	121.029	0.119867	Negative	E10	Benzoate; Benzoic acid; Benzenecarboxylic acid; Phenylformic acid; Dracylic acid$4-Hydroxybenzaldehyde; p-Hydroxybenzaldehyde	-0.751123
Glycerophospholipid metabolism	rLC_neg_mtb_910604	Mother plasma	Mother plasma::rLC_neg_mtb_910604	151.025	0.1178	Negative	E88	(R)-Glycerate	0.953202
Ascorbate (Vitamin C) and Aldarate Metabolism	rLC_neg_mtb_9198990	Milk	Milk::rLC_neg_mtb_9198990	192.022	663	Negative	E311	Citrate$$Isocitrate	0.00395172
Ascorbate (Vitamin C) and Aldarate Metabolism	rLC_neg_mtb_9231553	Milk	Milk::rLC_neg_mtb_9231553	191.019	655	Negative	E105	D-glucurono-6,3-lactone$L-Ascorbate$D-glucurono-6,3-lactone	0.0156345
Ascorbate (Vitamin C) and Aldarate Metabolism	rLC_neg_mtb_9262463	Milk	Milk::rLC_neg_mtb_9262463	101.024	665	Negative	E754	NA	0.177744
Ascorbate (Vitamin C) and Aldarate Metabolism	rLC_neg_mtb_931716	Mother plasma	Mother plasma::rLC_neg_mtb_931716	119.035	0.1674	Negative	E33	NA	0.126061
Aspartate and asparagine metabolism	rLC_neg_mtb_932219	Mother plasma	Mother plasma::rLC_neg_mtb_932219	142.998	0.159133	Negative	E117	4-Hydroxy-2-oxoglutarate; 4-Hydroxy-2-oxoglutaric acid$4-Hydroxy-2-oxoglutarate	0.611925
Bile acid biosynthesis	rLC_neg_mtb_9326002	Milk	Milk::rLC_neg_mtb_9326002	73.0296	672	Negative	E29	(R)-Lactaldehyde; D-Lactaldehyde; D-2-Hydroxypropionaldehyde$(S)-Lactaldehyde; L-Lactaldehyde; L-2-Hydroxypropionaldehyde$Hydroxyacetone; Acetol; 1-Hydroxy-2-propanone; 2-Ketopropyl alcohol; Acetone alcohol; Pyruvinalcohol; Pyruvic alcohol; Methylketol$Propionate (n-C3:0)	0.0108603
Squalene and cholesterol biosynthesis	rLC_neg_mtb_9326002	Milk	Milk::rLC_neg_mtb_9326002	73.0296	672	Negative	E29	(R)-Lactaldehyde; D-Lactaldehyde; D-2-Hydroxypropionaldehyde$(S)-Lactaldehyde; L-Lactaldehyde; L-2-Hydroxypropionaldehyde$Hydroxyacetone; Acetol; 1-Hydroxy-2-propanone; 2-Ketopropyl alcohol; Acetone alcohol; Pyruvinalcohol; Pyruvic alcohol; Methylketol$Propionate (n-C3:0)	0.0108603
Vitamin B6 (pyridoxine) metabolism	rLC_neg_mtb_932886	Mother plasma	Mother plasma::rLC_neg_mtb_932886	182.046	0.146733	Negative	E52	4-Pyridoxate; 4-Pyridoxic acid	0.636039
CoA Catabolism	rLC_neg_mtb_933434	Mother plasma	Mother plasma::rLC_neg_mtb_933434	218.102	0.159133	Negative	E35	(R)-Pantothenate	0.818674
Vitamin B5 - CoA biosynthesis from pantothenate	rLC_neg_mtb_933434	Mother plasma	Mother plasma::rLC_neg_mtb_933434	218.102	0.159133	Negative	E35	(R)-Pantothenate	0.818674
Ascorbate (Vitamin C) and Aldarate Metabolism	rLC_neg_mtb_9364683	Milk	Milk::rLC_neg_mtb_9364683	59.0141	661	Negative	E754	NA	0.00792144
Ascorbate (Vitamin C) and Aldarate Metabolism	rLC_neg_mtb_9365618	Milk	Milk::rLC_neg_mtb_9365618	101.024	678	Negative	E580	NA	0.0244066
Ascorbate (Vitamin C) and Aldarate Metabolism	rLC_neg_mtb_9468195	Milk	Milk::rLC_neg_mtb_9468195	87.0087	682	Negative	E105	D-glucurono-6,3-lactone$L-Ascorbate$D-glucurono-6,3-lactone	0.0100213
Vitamin B2 (riboflavin) metabolism	rLC_neg_mtb_954098	Mother plasma	Mother plasma::rLC_neg_mtb_954098	228.055	0.134333	Negative	E85	Reduced FMN; FMNH2	-0.559386
Ascorbate (Vitamin C) and Aldarate Metabolism	rLC_neg_mtb_9592242	Milk	Milk::rLC_neg_mtb_9592242	59.0141	0.68	Negative	E754	NA	0.00792144
Ascorbate (Vitamin C) and Aldarate Metabolism	rLC_neg_mtb_9643759	Milk	Milk::rLC_neg_mtb_9643759	191.019	0.68	Negative	E105	D-glucurono-6,3-lactone$L-Ascorbate$D-glucurono-6,3-lactone	0.0234707
Ascorbate (Vitamin C) and Aldarate Metabolism	rLC_neg_mtb_9836776	Milk	Milk::rLC_neg_mtb_9836776	191.019	0.69	Negative	E105	D-glucurono-6,3-lactone$L-Ascorbate$D-glucurono-6,3-lactone	0.026708
Ascorbate (Vitamin C) and Aldarate Metabolism	rLC_neg_mtb_9939159	Milk	Milk::rLC_neg_mtb_9939159	59.014	692	Negative	E754	NA	0.00792144
Ascorbate (Vitamin C) and Aldarate Metabolism	rLC_neg_mtb_9979578	Milk	Milk::rLC_neg_mtb_9979578	171.007	711	Negative	E570	NA	0.00568078
Ascorbate (Vitamin C) and Aldarate Metabolism	rLC_neg_mtb_9979859	Milk	Milk::rLC_neg_mtb_9979859	191.019	705	Negative	E105	D-glucurono-6,3-lactone$L-Ascorbate$D-glucurono-6,3-lactone	0.0204811
Butanoate metabolism	rLC_pos_mtb_1008358	Mother VAMS	Mother VAMS::rLC_pos_mtb_1008358	118.087	0.0806	Positive	E5	Glycine betaine$5-Aminopentanoate; 5-Aminopentanoic acid; 5-Aminovaleric acid$L-Valine	0.724177
Glycine, serine, alanine and threonine metabolism	rLC_pos_mtb_1008358	Mother VAMS	Mother VAMS::rLC_pos_mtb_1008358	118.087	0.0806	Positive	E5	Glycine betaine$5-Aminopentanoate; 5-Aminopentanoic acid; 5-Aminovaleric acid$L-Valine	0.724177
Valine, leucine and isoleucine degradation	rLC_pos_mtb_1008358	Mother VAMS	Mother VAMS::rLC_pos_mtb_1008358	118.087	0.0806	Positive	E5	Glycine betaine$5-Aminopentanoate; 5-Aminopentanoic acid; 5-Aminovaleric acid$L-Valine	0.724177
Phosphatidylinositol phosphate metabolism	rLC_pos_mtb_10144928	Milk	Milk::rLC_pos_mtb_10144928	493.014	659	Positive	E2	1-Phosphatidyl-1D-myo-inositol 3-phosphate	0.00454578
Biopterin metabolism	rLC_pos_mtb_1017385	Milk	Milk::rLC_pos_mtb_1017385	242.125	0.11	Positive	E6	Tetrahydrobiopterin	0.0103587
Tyrosine metabolism	rLC_pos_mtb_1017385	Milk	Milk::rLC_pos_mtb_1017385	242.125	0.11	Positive	E6	Tetrahydrobiopterin	0.0103587
Aminosugars metabolism	rLC_pos_mtb_1089952	Milk	Milk::rLC_pos_mtb_1089952	405.006	112	Positive	E2	UDP	-0.00384861
Blood Group Biosynthesis	rLC_pos_mtb_1089952	Milk	Milk::rLC_pos_mtb_1089952	405.006	112	Positive	E2	UDP	-0.00384861
Galactose metabolism	rLC_pos_mtb_1089952	Milk	Milk::rLC_pos_mtb_1089952	405.006	112	Positive	E2	UDP	-0.00384861
Glycosphingolipid biosynthesis - ganglioseries	rLC_pos_mtb_1089952	Milk	Milk::rLC_pos_mtb_1089952	405.006	112	Positive	E2	UDP	-0.00384861
Glycosphingolipid biosynthesis - globoseries	rLC_pos_mtb_1089952	Milk	Milk::rLC_pos_mtb_1089952	405.006	112	Positive	E2	UDP	-0.00384861
Glycosphingolipid biosynthesis - lactoseries	rLC_pos_mtb_1089952	Milk	Milk::rLC_pos_mtb_1089952	405.006	112	Positive	E2	UDP	-0.00384861
Glycosphingolipid biosynthesis - neolactoseries	rLC_pos_mtb_1089952	Milk	Milk::rLC_pos_mtb_1089952	405.006	112	Positive	E2	UDP	-0.00384861
Hyaluronan Metabolism	rLC_pos_mtb_1089952	Milk	Milk::rLC_pos_mtb_1089952	405.006	112	Positive	E2	UDP	-0.00384861
Keratan sulfate biosynthesis	rLC_pos_mtb_1089952	Milk	Milk::rLC_pos_mtb_1089952	405.006	112	Positive	E2	UDP	-0.00384861
Keratan sulfate degradation	rLC_pos_mtb_1089952	Milk	Milk::rLC_pos_mtb_1089952	405.006	112	Positive	E2	UDP	-0.00384861
N-Glycan biosynthesis	rLC_pos_mtb_1089952	Milk	Milk::rLC_pos_mtb_1089952	405.006	112	Positive	E2	UDP	-0.00384861
O-Glycan biosynthesis	rLC_pos_mtb_1089952	Milk	Milk::rLC_pos_mtb_1089952	405.006	112	Positive	E2	UDP	-0.00384861
Pentose and Glucuronate Interconversions	rLC_pos_mtb_1089952	Milk	Milk::rLC_pos_mtb_1089952	405.006	112	Positive	E2	UDP	-0.00384861
Porphyrin metabolism	rLC_pos_mtb_1089952	Milk	Milk::rLC_pos_mtb_1089952	405.006	112	Positive	E2	UDP	-0.00384861
Proteoglycan biosynthesis	rLC_pos_mtb_1089952	Milk	Milk::rLC_pos_mtb_1089952	405.006	112	Positive	E2	UDP	-0.00384861
Pyrimidine metabolism	rLC_pos_mtb_1089952	Milk	Milk::rLC_pos_mtb_1089952	405.006	112	Positive	E2	UDP	-0.00384861
Starch and Sucrose Metabolism	rLC_pos_mtb_1089952	Milk	Milk::rLC_pos_mtb_1089952	405.006	112	Positive	E2	UDP	-0.00384861
Tyrosine metabolism	rLC_pos_mtb_1089952	Milk	Milk::rLC_pos_mtb_1089952	405.006	112	Positive	E2	UDP	-0.00384861
Butanoate metabolism	rLC_pos_mtb_1107986	Mother VAMS	Mother VAMS::rLC_pos_mtb_1107986	156.042	0.101267	Positive	E6	Glycine betaine$5-Aminopentanoate; 5-Aminopentanoic acid; 5-Aminovaleric acid$L-Valine	0.490045
Glycine, serine, alanine and threonine metabolism	rLC_pos_mtb_1107986	Mother VAMS	Mother VAMS::rLC_pos_mtb_1107986	156.042	0.101267	Positive	E6	Glycine betaine$5-Aminopentanoate; 5-Aminopentanoic acid; 5-Aminovaleric acid$L-Valine	0.490045
Valine, leucine and isoleucine degradation	rLC_pos_mtb_1107986	Mother VAMS	Mother VAMS::rLC_pos_mtb_1107986	156.042	0.101267	Positive	E6	Glycine betaine$5-Aminopentanoate; 5-Aminopentanoic acid; 5-Aminovaleric acid$L-Valine	0.490045
Alanine and Aspartate Metabolism	rLC_pos_mtb_1174325	Mother VAMS	Mother VAMS::rLC_pos_mtb_1174325	176.056	0.0764667	Positive	E4	N-Formyl-L-glutamate$N-Acetyl-L-aspartate	0.235666
Vitamin B9 (folate) metabolism	rLC_pos_mtb_1174325	Mother VAMS	Mother VAMS::rLC_pos_mtb_1174325	176.056	0.0764667	Positive	E4	N-Formyl-L-glutamate$N-Acetyl-L-aspartate	0.235666
Keratan sulfate degradation	rLC_pos_mtb_1181147	Milk	Milk::rLC_pos_mtb_1181147	730.238	89	Positive	E86	(alpha-D-mannosyl)2-beta-D-mannosyl-N-acetylglucosamine	0.411277
N-Glycan Degradation	rLC_pos_mtb_1181147	Milk	Milk::rLC_pos_mtb_1181147	730.238	89	Positive	E86	(alpha-D-mannosyl)2-beta-D-mannosyl-N-acetylglucosamine	0.411277
Vitamin B9 (folate) metabolism	rLC_pos_mtb_119275	Milk	Milk::rLC_pos_mtb_119275	288.067	0.01	Positive	E140	N1-(5-Phospho-D-ribosyl)glycinamide	0.0106261
Vitamin B9 (folate) metabolism	rLC_pos_mtb_120036	Milk	Milk::rLC_pos_mtb_120036	309.047	14	Positive	E140	N1-(5-Phospho-D-ribosyl)glycinamide	0.0145311
Tyrosine metabolism	rLC_pos_mtb_1227982	Milk	Milk::rLC_pos_mtb_1227982	200.067	74	Positive	E4	5-hydroxytryptophol$1,2-dehydrosalsolinol	-0.0544956
Propanoate metabolism	rLC_pos_mtb_1343903	Milk	Milk::rLC_pos_mtb_1343903	207.048	93	Positive	E14	(2S,3R)-3-Hydroxybutane-1,2,3-tricarboxylate; Methylisocitrate; Methylisocitric acid	0.00280318
Phosphatidylinositol phosphate metabolism	rLC_pos_mtb_1346848	Milk	Milk::rLC_pos_mtb_1346848	493.014	105	Positive	E1	1-Phosphatidyl-1D-myo-inositol 3-phosphate	0.00643663
Butanoate metabolism	rLC_pos_mtb_1454846	Mother VAMS	Mother VAMS::rLC_pos_mtb_1454846	140.068	0.103333	Positive	E6	Glycine betaine$5-Aminopentanoate; 5-Aminopentanoic acid; 5-Aminovaleric acid$L-Valine	0.766156
Glycine, serine, alanine and threonine metabolism	rLC_pos_mtb_1454846	Mother VAMS	Mother VAMS::rLC_pos_mtb_1454846	140.068	0.103333	Positive	E6	Glycine betaine$5-Aminopentanoate; 5-Aminopentanoic acid; 5-Aminovaleric acid$L-Valine	0.766156
Valine, leucine and isoleucine degradation	rLC_pos_mtb_1454846	Mother VAMS	Mother VAMS::rLC_pos_mtb_1454846	140.068	0.103333	Positive	E6	Glycine betaine$5-Aminopentanoate; 5-Aminopentanoic acid; 5-Aminovaleric acid$L-Valine	0.766156
C5-Branched dibasic acid metabolism	rLC_pos_mtb_146565	Mother plasma	Mother plasma::rLC_pos_mtb_146565	131.034	0.0268667	Positive	E33	Mesaconate; 2-Methylfumarate; Mesaconic acid; Methylfumaric acid$Itaconate; Itaconic acid; Methylenesuccinic acid	1.13829
Butanoate metabolism	rLC_pos_mtb_1478615	Mother VAMS	Mother VAMS::rLC_pos_mtb_1478615	118.086	0.109533	Positive	E6	Glycine betaine$5-Aminopentanoate; 5-Aminopentanoic acid; 5-Aminovaleric acid$L-Valine	0.292471
Glycine, serine, alanine and threonine metabolism	rLC_pos_mtb_1478615	Mother VAMS	Mother VAMS::rLC_pos_mtb_1478615	118.086	0.109533	Positive	E6	Glycine betaine$5-Aminopentanoate; 5-Aminopentanoic acid; 5-Aminovaleric acid$L-Valine	0.292471
Valine, leucine and isoleucine degradation	rLC_pos_mtb_1478615	Mother VAMS	Mother VAMS::rLC_pos_mtb_1478615	118.086	0.109533	Positive	E6	Glycine betaine$5-Aminopentanoate; 5-Aminopentanoic acid; 5-Aminovaleric acid$L-Valine	0.292471
Vitamin B9 (folate) metabolism	rLC_pos_mtb_158823	Milk	Milk::rLC_pos_mtb_158823	287.065	19	Positive	E140	N1-(5-Phospho-D-ribosyl)glycinamide	0.350945
Pyrimidine metabolism	rLC_pos_mtb_161572	Mother VAMS	Mother VAMS::rLC_pos_mtb_161572	244.093	0.0434	Positive	E10	gamma-Glutamyl-beta-cyanoalanine$Cytidine	0.350777
Chondroitin sulfate degradation	rLC_pos_mtb_1641356	Milk	Milk::rLC_pos_mtb_1641356	177.038	124	Positive	E24	3-Dehydro-L-gulonate$L-Iduronic acid$D-Glucuronate	0.0189986
Heparan sulfate degradation	rLC_pos_mtb_1641356	Milk	Milk::rLC_pos_mtb_1641356	177.038	124	Positive	E24	3-Dehydro-L-gulonate$L-Iduronic acid$D-Glucuronate	0.0189986
Hyaluronan Metabolism	rLC_pos_mtb_1641356	Milk	Milk::rLC_pos_mtb_1641356	177.038	124	Positive	E24	3-Dehydro-L-gulonate$L-Iduronic acid$D-Glucuronate	0.0189986
Pentose and Glucuronate Interconversions	rLC_pos_mtb_1641356	Milk	Milk::rLC_pos_mtb_1641356	177.038	124	Positive	E24	3-Dehydro-L-gulonate$L-Iduronic acid$D-Glucuronate	0.0189986
Phosphatidylinositol phosphate metabolism	rLC_pos_mtb_1641356	Milk	Milk::rLC_pos_mtb_1641356	177.038	124	Positive	E24	3-Dehydro-L-gulonate$L-Iduronic acid$D-Glucuronate	0.0189986
Porphyrin metabolism	rLC_pos_mtb_1641356	Milk	Milk::rLC_pos_mtb_1641356	177.038	124	Positive	E24	3-Dehydro-L-gulonate$L-Iduronic acid$D-Glucuronate	0.0189986
Tyrosine metabolism	rLC_pos_mtb_1641356	Milk	Milk::rLC_pos_mtb_1641356	177.038	124	Positive	E24	3-Dehydro-L-gulonate$L-Iduronic acid$D-Glucuronate	0.0189986
Ascorbate (Vitamin C) and Aldarate Metabolism	rLC_pos_mtb_1641356	Milk	Milk::rLC_pos_mtb_1641356	177.038	124	Positive	E24	3-Dehydro-L-gulonate$L-Iduronic acid$D-Glucuronate	0.0189986
D4&E4-neuroprostanes formation	rLC_pos_mtb_1641356	Milk	Milk::rLC_pos_mtb_1641356	177.038	124	Positive	E24	3-Dehydro-L-gulonate$L-Iduronic acid$D-Glucuronate	0.0189986
Purine metabolism	rLC_pos_mtb_1641356	Milk	Milk::rLC_pos_mtb_1641356	177.038	124	Positive	E24	3-Dehydro-L-gulonate$L-Iduronic acid$D-Glucuronate	0.0189986
Purine metabolism	rLC_pos_mtb_171294	Milk	Milk::rLC_pos_mtb_171294	237.015	17	Positive	E17	5-Deoxyribose-1-phosphate; 5-Deoxy-alpha-D-ribose-1-phosphate$2-Deoxy-D-ribose 1-phosphate$2-Deoxy-D-ribose 5-phosphate	0.00431271
Drug metabolism - other enzymes	rLC_pos_mtb_179696	Mother plasma	Mother plasma::rLC_pos_mtb_179696	162.066	0.0227333	Positive	E3	N-Acetylisoniazid; (N)1-Acetylisoniazid	-0.827256
Arginine and Proline Metabolism	rLC_pos_mtb_238847	Mother VAMS	Mother VAMS::rLC_pos_mtb_238847	132.065	0.0268667	Positive	E15	L-Glutamate 5-semialdehyde; L-Glutamate gamma-semialdehyde$trans-4-Hydroxy-L-proline$5-Aminolevulinate; 5-Amino-4-oxopentanoate; 5-Amino-4-oxovaleric acid$cis-4-Hydroxy-D-proline$5-Amino-2-oxopentanoic acid; 5-Amino-2-oxopentanoate; 2-Oxo-5-amino-pentanoate; 2-Oxo-5-aminopentanoate; alpha-Keto-delta-aminopentanoate; 2-Oxo-5-aminovalerate	-0.452072
Aspartate and asparagine metabolism	rLC_pos_mtb_238847	Mother VAMS	Mother VAMS::rLC_pos_mtb_238847	132.065	0.0268667	Positive	E15	L-Glutamate 5-semialdehyde; L-Glutamate gamma-semialdehyde$trans-4-Hydroxy-L-proline$5-Aminolevulinate; 5-Amino-4-oxopentanoate; 5-Amino-4-oxovaleric acid$cis-4-Hydroxy-D-proline$5-Amino-2-oxopentanoic acid; 5-Amino-2-oxopentanoate; 2-Oxo-5-amino-pentanoate; 2-Oxo-5-aminopentanoate; alpha-Keto-delta-aminopentanoate; 2-Oxo-5-aminovalerate	-0.452072
Glycine, serine, alanine and threonine metabolism	rLC_pos_mtb_238847	Mother VAMS	Mother VAMS::rLC_pos_mtb_238847	132.065	0.0268667	Positive	E15	L-Glutamate 5-semialdehyde; L-Glutamate gamma-semialdehyde$trans-4-Hydroxy-L-proline$5-Aminolevulinate; 5-Amino-4-oxopentanoate; 5-Amino-4-oxovaleric acid$cis-4-Hydroxy-D-proline$5-Amino-2-oxopentanoic acid; 5-Amino-2-oxopentanoate; 2-Oxo-5-amino-pentanoate; 2-Oxo-5-aminopentanoate; alpha-Keto-delta-aminopentanoate; 2-Oxo-5-aminovalerate	-0.452072
Porphyrin metabolism	rLC_pos_mtb_238847	Mother VAMS	Mother VAMS::rLC_pos_mtb_238847	132.065	0.0268667	Positive	E15	L-Glutamate 5-semialdehyde; L-Glutamate gamma-semialdehyde$trans-4-Hydroxy-L-proline$5-Aminolevulinate; 5-Amino-4-oxopentanoate; 5-Amino-4-oxovaleric acid$cis-4-Hydroxy-D-proline$5-Amino-2-oxopentanoic acid; 5-Amino-2-oxopentanoate; 2-Oxo-5-amino-pentanoate; 2-Oxo-5-aminopentanoate; alpha-Keto-delta-aminopentanoate; 2-Oxo-5-aminovalerate	-0.452072
Urea cycle/amino group metabolism	rLC_pos_mtb_238847	Mother VAMS	Mother VAMS::rLC_pos_mtb_238847	132.065	0.0268667	Positive	E15	L-Glutamate 5-semialdehyde; L-Glutamate gamma-semialdehyde$trans-4-Hydroxy-L-proline$5-Aminolevulinate; 5-Amino-4-oxopentanoate; 5-Amino-4-oxovaleric acid$cis-4-Hydroxy-D-proline$5-Amino-2-oxopentanoic acid; 5-Amino-2-oxopentanoate; 2-Oxo-5-amino-pentanoate; 2-Oxo-5-aminopentanoate; alpha-Keto-delta-aminopentanoate; 2-Oxo-5-aminovalerate	-0.452072
Vitamin E metabolism	rLC_pos_mtb_2494223	Milk	Milk::rLC_pos_mtb_2494223	246.125	0.2	Positive	E38	gama-carboxyethyl-hydroxychroman	0.00267259
Alanine and Aspartate Metabolism	rLC_pos_mtb_261	Mother VAMS	Mother VAMS::rLC_pos_mtb_261	134.044	0.0165333	Positive	E2	L-Aspartate$D-Aspartate	-0.362961
Carbon fixation	rLC_pos_mtb_261	Mother VAMS	Mother VAMS::rLC_pos_mtb_261	134.044	0.0165333	Positive	E2	L-Aspartate$D-Aspartate	-0.362961
Nitrogen metabolism	rLC_pos_mtb_261	Mother VAMS	Mother VAMS::rLC_pos_mtb_261	134.044	0.0165333	Positive	E2	L-Aspartate$D-Aspartate	-0.362961
Pyrimidine metabolism	rLC_pos_mtb_261	Mother VAMS	Mother VAMS::rLC_pos_mtb_261	134.044	0.0165333	Positive	E2	L-Aspartate$D-Aspartate	-0.362961
Vitamin B3 (nicotinate and nicotinamide) metabolism	rLC_pos_mtb_261	Mother VAMS	Mother VAMS::rLC_pos_mtb_261	134.044	0.0165333	Positive	E2	L-Aspartate$D-Aspartate	-0.362961
Tyrosine metabolism	rLC_pos_mtb_2703715	Milk	Milk::rLC_pos_mtb_2703715	147.044	198	Positive	E42	cis-2-Hydroxycinnamate; 2-Coumarinate$4-Coumarate; p-Coumaric acid; trans-4-Hydroxycinnamate; trans-p-Hydroxycinnamate; 4-Hydroxycinnamic acid; 4-Hydroxycinnamate$enol-Phenylpyruvate$Phenylpyruvate	0.00411728
Biopterin metabolism	rLC_pos_mtb_2707748	Milk	Milk::rLC_pos_mtb_2707748	482.174	165	Positive	E45	5-Methyltetrahydrofolate	0.00874154
Vitamin B9 (folate) metabolism	rLC_pos_mtb_2707748	Milk	Milk::rLC_pos_mtb_2707748	482.174	165	Positive	E45	5-Methyltetrahydrofolate	0.00874154
Tyrosine metabolism	rLC_pos_mtb_2713464	Mother plasma	Mother plasma::rLC_pos_mtb_2713464	202.048	0.208733	Positive	E11	adrenochrome$Hippurate; Hippuric acid; N-Benzoylglycine; Benzoylaminoacetic acid	-0.950667
Histidine metabolism	rLC_pos_mtb_2733945	Mother VAMS	Mother VAMS::rLC_pos_mtb_2733945	123.055	0.190133	Positive	E2	3-Methylimidazoleacetic acid	-0.314597
Vitamin B3 (nicotinate and nicotinamide) metabolism	rLC_pos_mtb_2733945	Mother VAMS	Mother VAMS::rLC_pos_mtb_2733945	123.055	0.190133	Positive	E2	3-Methylimidazoleacetic acid	-0.314597
Drug metabolism - cytochrome P450	rLC_pos_mtb_2734364	Mother VAMS	Mother VAMS::rLC_pos_mtb_2734364	178.086	0.188067	Positive	E5	2-Phenyl-1,3-propanediol monocarbamate$	0.0778081
Tryptophan metabolism	rLC_pos_mtb_2734364	Mother VAMS	Mother VAMS::rLC_pos_mtb_2734364	178.086	0.188067	Positive	E5	2-Phenyl-1,3-propanediol monocarbamate$	0.0778081
Tyrosine metabolism	rLC_pos_mtb_2734364	Mother VAMS	Mother VAMS::rLC_pos_mtb_2734364	178.086	0.188067	Positive	E5	2-Phenyl-1,3-propanediol monocarbamate$	0.0778081
Tyrosine metabolism	rLC_pos_mtb_2760341	Mother plasma	Mother plasma::rLC_pos_mtb_2760341	180.066	0.196333	Positive	E11	adrenochrome$Hippurate; Hippuric acid; N-Benzoylglycine; Benzoylaminoacetic acid	-0.718485
Tyrosine metabolism	rLC_pos_mtb_2760351	Mother plasma	Mother plasma::rLC_pos_mtb_2760351	181.075	0.212867	Positive	E23	adrenochrome o-semiquinone	-0.47815
Phosphatidylinositol phosphate metabolism	rLC_pos_mtb_276814	Milk	Milk::rLC_pos_mtb_276814	325.063	25	Positive	E66	CMP	0.00614875
Keratan sulfate degradation	rLC_pos_mtb_2804725	Milk	Milk::rLC_pos_mtb_2804725	147.065	0.19	Positive	E38	6-Deoxy-L-galactose; L-Fucose	0.00414963
N-Glycan Degradation	rLC_pos_mtb_2804725	Milk	Milk::rLC_pos_mtb_2804725	147.065	0.19	Positive	E38	6-Deoxy-L-galactose; L-Fucose	0.00414963
Biopterin metabolism	rLC_pos_mtb_2807153	Milk	Milk::rLC_pos_mtb_2807153	240.107	194	Positive	E59	6,7-Dihydrobiopterin$7,8-Dihydrobiopterin$6-Lactoyl-5,6,7,8-tetrahydropterin	0.011278
Tyrosine metabolism	rLC_pos_mtb_2807153	Milk	Milk::rLC_pos_mtb_2807153	240.107	194	Positive	E59	6,7-Dihydrobiopterin$7,8-Dihydrobiopterin$6-Lactoyl-5,6,7,8-tetrahydropterin	0.011278
Drug metabolism - cytochrome P450	rLC_pos_mtb_2844606	Milk	Milk::rLC_pos_mtb_2844606	235.179	207	Positive	E18	Lidocaine	-0.213879
Vitamin E metabolism	rLC_pos_mtb_2848255	Milk	Milk::rLC_pos_mtb_2848255	441.332	209	Positive	E61	13'-hydroxy-alpha-tocotrienol	0.0152377
Phosphatidylinositol phosphate metabolism	rLC_pos_mtb_285765	Milk	Milk::rLC_pos_mtb_285765	324.058	25	Positive	E66	CMP	0.101508
CoA Catabolism	rLC_pos_mtb_2877614	Milk	Milk::rLC_pos_mtb_2877614	258.074	205	Positive	E71	(R)-Pantothenate	0.0230515
Vitamin B5 - CoA biosynthesis from pantothenate	rLC_pos_mtb_2877614	Milk	Milk::rLC_pos_mtb_2877614	258.074	205	Positive	E71	(R)-Pantothenate	0.0230515
Carnitine shuttle	rLC_pos_mtb_2891301	Mother plasma	Mother plasma::rLC_pos_mtb_2891301	472.344	0.200467	Positive	E10	dihomo-gamma-linolenyl carnitine	-0.606534
Carnitine shuttle	rLC_pos_mtb_2946503	Milk	Milk::rLC_pos_mtb_2946503	1010.32	207	Positive	E19	vaccenyl coenzyme A$gamma-linolenoyl-CoA$alpha-Linolenoyl-CoA$trans-Octadec-2-enoyl-CoA$Octadecenoyl-CoA (n-C18:1CoA)	-0.0104859
Fatty acid oxidation	rLC_pos_mtb_2946503	Milk	Milk::rLC_pos_mtb_2946503	1010.32	207	Positive	E19	vaccenyl coenzyme A$gamma-linolenoyl-CoA$alpha-Linolenoyl-CoA$trans-Octadec-2-enoyl-CoA$Octadecenoyl-CoA (n-C18:1CoA)	-0.0104859
Fatty acid oxidation, peroxisome	rLC_pos_mtb_2946503	Milk	Milk::rLC_pos_mtb_2946503	1010.32	207	Positive	E19	vaccenyl coenzyme A$gamma-linolenoyl-CoA$alpha-Linolenoyl-CoA$trans-Octadec-2-enoyl-CoA$Octadecenoyl-CoA (n-C18:1CoA)	-0.0104859
Omega-6 fatty acid metabolism	rLC_pos_mtb_2946503	Milk	Milk::rLC_pos_mtb_2946503	1010.32	207	Positive	E19	vaccenyl coenzyme A$gamma-linolenoyl-CoA$alpha-Linolenoyl-CoA$trans-Octadec-2-enoyl-CoA$Octadecenoyl-CoA (n-C18:1CoA)	-0.0104859
Polyunsaturated fatty acid biosynthesis	rLC_pos_mtb_2946503	Milk	Milk::rLC_pos_mtb_2946503	1010.32	207	Positive	E19	vaccenyl coenzyme A$gamma-linolenoyl-CoA$alpha-Linolenoyl-CoA$trans-Octadec-2-enoyl-CoA$Octadecenoyl-CoA (n-C18:1CoA)	-0.0104859
R Group Synthesis	rLC_pos_mtb_2946503	Milk	Milk::rLC_pos_mtb_2946503	1010.32	207	Positive	E19	vaccenyl coenzyme A$gamma-linolenoyl-CoA$alpha-Linolenoyl-CoA$trans-Octadec-2-enoyl-CoA$Octadecenoyl-CoA (n-C18:1CoA)	-0.0104859
Carnitine shuttle	rLC_pos_mtb_2946531	Milk	Milk::rLC_pos_mtb_2946531	1011.32	207	Positive	E19	vaccenyl coenzyme A$gamma-linolenoyl-CoA$alpha-Linolenoyl-CoA$trans-Octadec-2-enoyl-CoA$Octadecenoyl-CoA (n-C18:1CoA)	-0.0012972
Fatty acid oxidation	rLC_pos_mtb_2946531	Milk	Milk::rLC_pos_mtb_2946531	1011.32	207	Positive	E19	vaccenyl coenzyme A$gamma-linolenoyl-CoA$alpha-Linolenoyl-CoA$trans-Octadec-2-enoyl-CoA$Octadecenoyl-CoA (n-C18:1CoA)	-0.0012972
Fatty acid oxidation, peroxisome	rLC_pos_mtb_2946531	Milk	Milk::rLC_pos_mtb_2946531	1011.32	207	Positive	E19	vaccenyl coenzyme A$gamma-linolenoyl-CoA$alpha-Linolenoyl-CoA$trans-Octadec-2-enoyl-CoA$Octadecenoyl-CoA (n-C18:1CoA)	-0.0012972
Omega-6 fatty acid metabolism	rLC_pos_mtb_2946531	Milk	Milk::rLC_pos_mtb_2946531	1011.32	207	Positive	E19	vaccenyl coenzyme A$gamma-linolenoyl-CoA$alpha-Linolenoyl-CoA$trans-Octadec-2-enoyl-CoA$Octadecenoyl-CoA (n-C18:1CoA)	-0.0012972
Polyunsaturated fatty acid biosynthesis	rLC_pos_mtb_2946531	Milk	Milk::rLC_pos_mtb_2946531	1011.32	207	Positive	E19	vaccenyl coenzyme A$gamma-linolenoyl-CoA$alpha-Linolenoyl-CoA$trans-Octadec-2-enoyl-CoA$Octadecenoyl-CoA (n-C18:1CoA)	-0.0012972
R Group Synthesis	rLC_pos_mtb_2946531	Milk	Milk::rLC_pos_mtb_2946531	1011.32	207	Positive	E19	vaccenyl coenzyme A$gamma-linolenoyl-CoA$alpha-Linolenoyl-CoA$trans-Octadec-2-enoyl-CoA$Octadecenoyl-CoA (n-C18:1CoA)	-0.0012972
Propanoate metabolism	rLC_pos_mtb_2962009	Milk	Milk::rLC_pos_mtb_2962009	59.0493	205	Positive	E84	Acetone; Dimethyl ketone; 2-Propanone$	0.529095
CoA Catabolism	rLC_pos_mtb_2964229	Milk	Milk::rLC_pos_mtb_2964229	184.095	231	Positive	E72	(R)-Pantothenate	0.0107771
Tyrosine metabolism	rLC_pos_mtb_2964229	Milk	Milk::rLC_pos_mtb_2964229	184.095	231	Positive	E72	(R)-Pantothenate	0.0107771
Vitamin B5 - CoA biosynthesis from pantothenate	rLC_pos_mtb_2964229	Milk	Milk::rLC_pos_mtb_2964229	184.095	231	Positive	E72	(R)-Pantothenate	0.0107771
Vitamin B6 (pyridoxine) metabolism	rLC_pos_mtb_2996753	Milk	Milk::rLC_pos_mtb_2996753	190.049	198	Positive	E86	Pyridoxal	0.00371171
Propanoate metabolism	rLC_pos_mtb_3061359	Milk	Milk::rLC_pos_mtb_3061359	60.0529	205	Positive	E84	Acetone; Dimethyl ketone; 2-Propanone$	0.00575993
CoA Catabolism	rLC_pos_mtb_3064754	Milk	Milk::rLC_pos_mtb_3064754	220.119	211	Positive	E71	(R)-Pantothenate	1.63704
Vitamin B5 - CoA biosynthesis from pantothenate	rLC_pos_mtb_3064754	Milk	Milk::rLC_pos_mtb_3064754	220.119	211	Positive	E71	(R)-Pantothenate	1.63704
CoA Catabolism	rLC_pos_mtb_3065186	Milk	Milk::rLC_pos_mtb_3065186	242.101	217	Positive	E71	(R)-Pantothenate	0.327877
Vitamin B5 - CoA biosynthesis from pantothenate	rLC_pos_mtb_3065186	Milk	Milk::rLC_pos_mtb_3065186	242.101	217	Positive	E71	(R)-Pantothenate	0.327877
Androgen and estrogen biosynthesis and metabolism	rLC_pos_mtb_3072344	Mother plasma	Mother plasma::rLC_pos_mtb_3072344	317.248	0.214933	Positive	E6	20alpha-Hydroxy-4-pregnen-3-one; 20alpha-Hydroxypregn-4-en-3-one; 20alpha-Hydroxyprogesterone$Pregnenolone; 5-Pregnen-3beta-ol-20-one; 3beta-Hydroxypregn-5-en-20-one$5alpha-Pregnane-3,20-dione	-0.490031
C21-steroid hormone biosynthesis and metabolism	rLC_pos_mtb_3072344	Mother plasma	Mother plasma::rLC_pos_mtb_3072344	317.248	0.214933	Positive	E6	20alpha-Hydroxy-4-pregnen-3-one; 20alpha-Hydroxypregn-4-en-3-one; 20alpha-Hydroxyprogesterone$Pregnenolone; 5-Pregnen-3beta-ol-20-one; 3beta-Hydroxypregn-5-en-20-one$5alpha-Pregnane-3,20-dione	-0.490031
CoA Catabolism	rLC_pos_mtb_3096538	Milk	Milk::rLC_pos_mtb_3096538	202.108	215	Positive	E71	(R)-Pantothenate	0.030232
Vitamin B5 - CoA biosynthesis from pantothenate	rLC_pos_mtb_3096538	Milk	Milk::rLC_pos_mtb_3096538	202.108	215	Positive	E71	(R)-Pantothenate	0.030232
Carnitine shuttle	rLC_pos_mtb_3232279	Mother VAMS	Mother VAMS::rLC_pos_mtb_3232279	496.339	0.233533	Positive	E7	docosa-4,7,10,13,16-pentaenoyl carnitine$clupanodonyl carnitine	-0.0266094
CoA Catabolism	rLC_pos_mtb_3255598	Milk	Milk::rLC_pos_mtb_3255598	202.108	238	Positive	E72	(R)-Pantothenate	0.00812764
Tyrosine metabolism	rLC_pos_mtb_3255598	Milk	Milk::rLC_pos_mtb_3255598	202.108	238	Positive	E72	(R)-Pantothenate	0.00812764
Vitamin B5 - CoA biosynthesis from pantothenate	rLC_pos_mtb_3255598	Milk	Milk::rLC_pos_mtb_3255598	202.108	238	Positive	E72	(R)-Pantothenate	0.00812764
Arachidonic acid metabolism	rLC_pos_mtb_3320262	Mother plasma	Mother plasma::rLC_pos_mtb_3320262	321.243	0.227333	Positive	E11	5-Hydroxyeicosatetraenoate$(15S)-15-Hydroxy-5,8,11-cis-13-trans-eicosatetraenoate; (15S)-15-Hydroxy-5,8,11-cis-13-trans-icosatetraenoate; (5Z,8Z,11Z,13E)-(15S)-15-Hydroxyicosa-5,8,11,13-tetraenoic acid; 15(S)-HETE$19(S)-HETE; (19S)-Hydroxyeicosatetraenoic acid; (19S)-Hydroxyicosatetraenoic acid; (19S)-Hydroxy arachidonic acid$20-Hydroxyeicosatetraenoic acid$16(R)-HETE; (5Z,8Z,11Z,14Z)-(16R)-16-Hy…	0.468171
Glycerophospholipid metabolism	rLC_pos_mtb_3320262	Mother plasma	Mother plasma::rLC_pos_mtb_3320262	321.243	0.227333	Positive	E11	5-Hydroxyeicosatetraenoate$(15S)-15-Hydroxy-5,8,11-cis-13-trans-eicosatetraenoate; (15S)-15-Hydroxy-5,8,11-cis-13-trans-icosatetraenoate; (5Z,8Z,11Z,13E)-(15S)-15-Hydroxyicosa-5,8,11,13-tetraenoic acid; 15(S)-HETE$19(S)-HETE; (19S)-Hydroxyeicosatetraenoic acid; (19S)-Hydroxyicosatetraenoic acid; (19S)-Hydroxy arachidonic acid$20-Hydroxyeicosatetraenoic acid$16(R)-HETE; (5Z,8Z,11Z,14Z)-(16R)-16-Hy…	0.468171
Vitamin A (retinol) metabolism	rLC_pos_mtb_3320262	Mother plasma	Mother plasma::rLC_pos_mtb_3320262	321.243	0.227333	Positive	E11	5-Hydroxyeicosatetraenoate$(15S)-15-Hydroxy-5,8,11-cis-13-trans-eicosatetraenoate; (15S)-15-Hydroxy-5,8,11-cis-13-trans-icosatetraenoate; (5Z,8Z,11Z,13E)-(15S)-15-Hydroxyicosa-5,8,11,13-tetraenoic acid; 15(S)-HETE$19(S)-HETE; (19S)-Hydroxyeicosatetraenoic acid; (19S)-Hydroxyicosatetraenoic acid; (19S)-Hydroxy arachidonic acid$20-Hydroxyeicosatetraenoic acid$16(R)-HETE; (5Z,8Z,11Z,14Z)-(16R)-16-Hy…	0.468171
CoA Catabolism	rLC_pos_mtb_3370599	Milk	Milk::rLC_pos_mtb_3370599	221.121	234	Positive	E72	(R)-Pantothenate	0.0396235
Vitamin B5 - CoA biosynthesis from pantothenate	rLC_pos_mtb_3370599	Milk	Milk::rLC_pos_mtb_3370599	221.121	234	Positive	E72	(R)-Pantothenate	0.0396235
Tryptophan metabolism	rLC_pos_mtb_3473742	Mother plasma	Mother plasma::rLC_pos_mtb_3473742	195.088	0.239733	Positive	E18	NA	-0.667669
Chondroitin sulfate degradation	rLC_pos_mtb_362542	Milk	Milk::rLC_pos_mtb_362542	177.039	37	Positive	E23	3-Dehydro-L-gulonate$L-Iduronic acid$D-Glucuronate	0.0223785
Heparan sulfate degradation	rLC_pos_mtb_362542	Milk	Milk::rLC_pos_mtb_362542	177.039	37	Positive	E23	3-Dehydro-L-gulonate$L-Iduronic acid$D-Glucuronate	0.0223785
Hyaluronan Metabolism	rLC_pos_mtb_362542	Milk	Milk::rLC_pos_mtb_362542	177.039	37	Positive	E23	3-Dehydro-L-gulonate$L-Iduronic acid$D-Glucuronate	0.0223785
Pentose and Glucuronate Interconversions	rLC_pos_mtb_362542	Milk	Milk::rLC_pos_mtb_362542	177.039	37	Positive	E23	3-Dehydro-L-gulonate$L-Iduronic acid$D-Glucuronate	0.0223785
Phosphatidylinositol phosphate metabolism	rLC_pos_mtb_362542	Milk	Milk::rLC_pos_mtb_362542	177.039	37	Positive	E23	3-Dehydro-L-gulonate$L-Iduronic acid$D-Glucuronate	0.0223785
Porphyrin metabolism	rLC_pos_mtb_362542	Milk	Milk::rLC_pos_mtb_362542	177.039	37	Positive	E23	3-Dehydro-L-gulonate$L-Iduronic acid$D-Glucuronate	0.0223785
Tyrosine metabolism	rLC_pos_mtb_362542	Milk	Milk::rLC_pos_mtb_362542	177.039	37	Positive	E23	3-Dehydro-L-gulonate$L-Iduronic acid$D-Glucuronate	0.0223785
Ascorbate (Vitamin C) and Aldarate Metabolism	rLC_pos_mtb_362542	Milk	Milk::rLC_pos_mtb_362542	177.039	37	Positive	E23	3-Dehydro-L-gulonate$L-Iduronic acid$D-Glucuronate	0.0223785
D4&E4-neuroprostanes formation	rLC_pos_mtb_362542	Milk	Milk::rLC_pos_mtb_362542	177.039	37	Positive	E23	3-Dehydro-L-gulonate$L-Iduronic acid$D-Glucuronate	0.0223785
Purine metabolism	rLC_pos_mtb_362542	Milk	Milk::rLC_pos_mtb_362542	177.039	37	Positive	E23	3-Dehydro-L-gulonate$L-Iduronic acid$D-Glucuronate	0.0223785
Aspartate and asparagine metabolism	rLC_pos_mtb_363111	Milk	Milk::rLC_pos_mtb_363111	214.071	33	Positive	E29	N-Succinyl-L-glutamate 5-semialdehyde; (2S)-2-(3-Carboxypropanoylamino)-5-oxopentanoic acid	-0.0420534
Purine metabolism	rLC_pos_mtb_363938	Milk	Milk::rLC_pos_mtb_363938	274.093	33	Positive	E77	Deoxyadenosine$5'-Deoxyadenosine	0.00792144
Porphyrin metabolism	rLC_pos_mtb_387961	Milk	Milk::rLC_pos_mtb_387961	141.018	39	Positive	E21	D-glucurono-6,3-lactone$L-Ascorbate$D-glucurono-6,3-lactone	0.0141112
Tyrosine metabolism	rLC_pos_mtb_387961	Milk	Milk::rLC_pos_mtb_387961	141.018	39	Positive	E21	D-glucurono-6,3-lactone$L-Ascorbate$D-glucurono-6,3-lactone	0.0141112
Ascorbate (Vitamin C) and Aldarate Metabolism	rLC_pos_mtb_387961	Milk	Milk::rLC_pos_mtb_387961	141.018	39	Positive	E21	D-glucurono-6,3-lactone$L-Ascorbate$D-glucurono-6,3-lactone	0.0141112
D4&E4-neuroprostanes formation	rLC_pos_mtb_387961	Milk	Milk::rLC_pos_mtb_387961	141.018	39	Positive	E21	D-glucurono-6,3-lactone$L-Ascorbate$D-glucurono-6,3-lactone	0.0141112
Purine metabolism	rLC_pos_mtb_387961	Milk	Milk::rLC_pos_mtb_387961	141.018	39	Positive	E21	D-glucurono-6,3-lactone$L-Ascorbate$D-glucurono-6,3-lactone	0.0141112
Beta-Alanine metabolism	rLC_pos_mtb_388539	Mother VAMS	Mother VAMS::rLC_pos_mtb_388539	110.071	0.0413333	Positive	E12	L-Histidine	-0.479529
Histidine metabolism	rLC_pos_mtb_388539	Mother VAMS	Mother VAMS::rLC_pos_mtb_388539	110.071	0.0413333	Positive	E12	L-Histidine	-0.479529
Beta-Alanine metabolism	rLC_pos_mtb_392189	Mother VAMS	Mother VAMS::rLC_pos_mtb_392189	157.079	0.0434	Positive	E12	L-Histidine	-0.474751
Histidine metabolism	rLC_pos_mtb_392189	Mother VAMS	Mother VAMS::rLC_pos_mtb_392189	157.079	0.0434	Positive	E12	L-Histidine	-0.474751
Histidine metabolism	rLC_pos_mtb_393109	Milk	Milk::rLC_pos_mtb_393109	157.061	41	Positive	E20	4-Imidazolone-5-propanoate	-0.00488252
Purine metabolism	rLC_pos_mtb_399226	Milk	Milk::rLC_pos_mtb_399226	336.067	35	Positive	E77	Deoxyadenosine$5'-Deoxyadenosine	0.0197586
Ubiquinone Biosynthesis	rLC_pos_mtb_4190966	Milk	Milk::rLC_pos_mtb_4190966	599.407	287	Positive	E23	2-Hexaprenyl-3-methyl-5-hydroxy-6-methoxy-1,4-benzoquinone$3-Hexaprenyl-4-hydroxy-5-methoxybenzoate	-0.00756729
Urea cycle/amino group metabolism	rLC_pos_mtb_4190966	Milk	Milk::rLC_pos_mtb_4190966	599.407	287	Positive	E23	2-Hexaprenyl-3-methyl-5-hydroxy-6-methoxy-1,4-benzoquinone$3-Hexaprenyl-4-hydroxy-5-methoxybenzoate	-0.00756729
Ubiquinone Biosynthesis	rLC_pos_mtb_4288211	Milk	Milk::rLC_pos_mtb_4288211	576.413	296	Positive	E23	2-Hexaprenyl-3-methyl-5-hydroxy-6-methoxy-1,4-benzoquinone$3-Hexaprenyl-4-hydroxy-5-methoxybenzoate	-0.0744765
Urea cycle/amino group metabolism	rLC_pos_mtb_4288211	Milk	Milk::rLC_pos_mtb_4288211	576.413	296	Positive	E23	2-Hexaprenyl-3-methyl-5-hydroxy-6-methoxy-1,4-benzoquinone$3-Hexaprenyl-4-hydroxy-5-methoxybenzoate	-0.0744765
Beta-Alanine metabolism	rLC_pos_mtb_460392	Mother VAMS	Mother VAMS::rLC_pos_mtb_460392	156.077	0.0434	Positive	E12	L-Histidine	-0.4108
Histidine metabolism	rLC_pos_mtb_460392	Mother VAMS	Mother VAMS::rLC_pos_mtb_460392	156.077	0.0434	Positive	E12	L-Histidine	-0.4108
Ascorbate (Vitamin C) and Aldarate Metabolism	rLC_pos_mtb_4619765	Mother plasma	Mother plasma::rLC_pos_mtb_4619765	430.379	0.338933	Positive	E24	alpha-Tocopherol; Vitamin E	1.55826
Vitamin E metabolism	rLC_pos_mtb_4619765	Mother plasma	Mother plasma::rLC_pos_mtb_4619765	430.379	0.338933	Positive	E24	alpha-Tocopherol; Vitamin E	1.55826
C21-steroid hormone biosynthesis and metabolism	rLC_pos_mtb_4807535	Mother plasma	Mother plasma::rLC_pos_mtb_4807535	585.268	0.3348	Positive	E5	Bilirubin	-0.780542
Porphyrin metabolism	rLC_pos_mtb_4807535	Mother plasma	Mother plasma::rLC_pos_mtb_4807535	585.268	0.3348	Positive	E5	Bilirubin	-0.780542
Ascorbate (Vitamin C) and Aldarate Metabolism	rLC_pos_mtb_4890219	Mother plasma	Mother plasma::rLC_pos_mtb_4890219	431.385	0.351333	Positive	E24	alpha-Tocopherol; Vitamin E	1.32039
Vitamin E metabolism	rLC_pos_mtb_4890219	Mother plasma	Mother plasma::rLC_pos_mtb_4890219	431.385	0.351333	Positive	E24	alpha-Tocopherol; Vitamin E	1.32039
Glycerophospholipid metabolism	rLC_pos_mtb_510876	Mother VAMS	Mother VAMS::rLC_pos_mtb_510876	429.056	0.0454667	Positive	E16	CDPethanolamine	0.471783
Vitamin E metabolism	rLC_pos_mtb_5206602	Milk	Milk::rLC_pos_mtb_5206602	430.378	345	Positive	E118	alpha-Tocopherol; Vitamin E	0.00350498
Vitamin E metabolism	rLC_pos_mtb_5645514	Milk	Milk::rLC_pos_mtb_5645514	431.392	355	Positive	E118	alpha-Tocopherol; Vitamin E	0.00748016
Arginine and Proline Metabolism	rLC_pos_mtb_585092	Mother VAMS	Mother VAMS::rLC_pos_mtb_585092	116.07	0.0496	Positive	E7	acetamidopropanal$D-Proline$L-Proline	-0.560179
Aspartate and asparagine metabolism	rLC_pos_mtb_585092	Mother VAMS	Mother VAMS::rLC_pos_mtb_585092	116.07	0.0496	Positive	E7	acetamidopropanal$D-Proline$L-Proline	-0.560179
Urea cycle/amino group metabolism	rLC_pos_mtb_585092	Mother VAMS	Mother VAMS::rLC_pos_mtb_585092	116.07	0.0496	Positive	E7	acetamidopropanal$D-Proline$L-Proline	-0.560179
Caffeine metabolism	rLC_pos_mtb_612388	Mother VAMS	Mother VAMS::rLC_pos_mtb_612388	203.053	0.0496	Positive	E20	D-Glucose$beta-D-Glucose$beta-D-Fructose; beta-Fruit sugar; beta-D-arabino-Hexulose; beta-Levulose; Fructose$alpha-D-Glucose$beta-D-Galactose$D-Tagatose; lyxo-Hexulose$myo-Inositol$1,7-Dimethylxanthine; Paraxanthine$$alpha-D-Galactose$D-Mannose	0.427299
Glycerophospholipid metabolism	rLC_pos_mtb_612388	Mother VAMS	Mother VAMS::rLC_pos_mtb_612388	203.053	0.0496	Positive	E20	D-Glucose$beta-D-Glucose$beta-D-Fructose; beta-Fruit sugar; beta-D-arabino-Hexulose; beta-Levulose; Fructose$alpha-D-Glucose$beta-D-Galactose$D-Tagatose; lyxo-Hexulose$myo-Inositol$1,7-Dimethylxanthine; Paraxanthine$$alpha-D-Galactose$D-Mannose	0.427299
Glycosphingolipid biosynthesis - globoseries	rLC_pos_mtb_612388	Mother VAMS	Mother VAMS::rLC_pos_mtb_612388	203.053	0.0496	Positive	E20	D-Glucose$beta-D-Glucose$beta-D-Fructose; beta-Fruit sugar; beta-D-arabino-Hexulose; beta-Levulose; Fructose$alpha-D-Glucose$beta-D-Galactose$D-Tagatose; lyxo-Hexulose$myo-Inositol$1,7-Dimethylxanthine; Paraxanthine$$alpha-D-Galactose$D-Mannose	0.427299
Hexose phosphorylation	rLC_pos_mtb_612388	Mother VAMS	Mother VAMS::rLC_pos_mtb_612388	203.053	0.0496	Positive	E20	D-Glucose$beta-D-Glucose$beta-D-Fructose; beta-Fruit sugar; beta-D-arabino-Hexulose; beta-Levulose; Fructose$alpha-D-Glucose$beta-D-Galactose$D-Tagatose; lyxo-Hexulose$myo-Inositol$1,7-Dimethylxanthine; Paraxanthine$$alpha-D-Galactose$D-Mannose	0.427299
N-Glycan Degradation	rLC_pos_mtb_612388	Mother VAMS	Mother VAMS::rLC_pos_mtb_612388	203.053	0.0496	Positive	E20	D-Glucose$beta-D-Glucose$beta-D-Fructose; beta-Fruit sugar; beta-D-arabino-Hexulose; beta-Levulose; Fructose$alpha-D-Glucose$beta-D-Galactose$D-Tagatose; lyxo-Hexulose$myo-Inositol$1,7-Dimethylxanthine; Paraxanthine$$alpha-D-Galactose$D-Mannose	0.427299
N-Glycan biosynthesis	rLC_pos_mtb_612388	Mother VAMS	Mother VAMS::rLC_pos_mtb_612388	203.053	0.0496	Positive	E20	D-Glucose$beta-D-Glucose$beta-D-Fructose; beta-Fruit sugar; beta-D-arabino-Hexulose; beta-Levulose; Fructose$alpha-D-Glucose$beta-D-Galactose$D-Tagatose; lyxo-Hexulose$myo-Inositol$1,7-Dimethylxanthine; Paraxanthine$$alpha-D-Galactose$D-Mannose	0.427299
Pentose phosphate pathway	rLC_pos_mtb_612388	Mother VAMS	Mother VAMS::rLC_pos_mtb_612388	203.053	0.0496	Positive	E20	D-Glucose$beta-D-Glucose$beta-D-Fructose; beta-Fruit sugar; beta-D-arabino-Hexulose; beta-Levulose; Fructose$alpha-D-Glucose$beta-D-Galactose$D-Tagatose; lyxo-Hexulose$myo-Inositol$1,7-Dimethylxanthine; Paraxanthine$$alpha-D-Galactose$D-Mannose	0.427299
Sialic acid metabolism	rLC_pos_mtb_612388	Mother VAMS	Mother VAMS::rLC_pos_mtb_612388	203.053	0.0496	Positive	E20	D-Glucose$beta-D-Glucose$beta-D-Fructose; beta-Fruit sugar; beta-D-arabino-Hexulose; beta-Levulose; Fructose$alpha-D-Glucose$beta-D-Galactose$D-Tagatose; lyxo-Hexulose$myo-Inositol$1,7-Dimethylxanthine; Paraxanthine$$alpha-D-Galactose$D-Mannose	0.427299
Starch and Sucrose Metabolism	rLC_pos_mtb_612388	Mother VAMS	Mother VAMS::rLC_pos_mtb_612388	203.053	0.0496	Positive	E20	D-Glucose$beta-D-Glucose$beta-D-Fructose; beta-Fruit sugar; beta-D-arabino-Hexulose; beta-Levulose; Fructose$alpha-D-Glucose$beta-D-Galactose$D-Tagatose; lyxo-Hexulose$myo-Inositol$1,7-Dimethylxanthine; Paraxanthine$$alpha-D-Galactose$D-Mannose	0.427299
Drug metabolism - other enzymes	rLC_pos_mtb_63405	Mother plasma	Mother plasma::rLC_pos_mtb_63405	349.021	0.00413333	Positive	E28	5-Fluorodeoxyuridine monophosphate	0.451435
Purine metabolism	rLC_pos_mtb_650004	Milk	Milk::rLC_pos_mtb_650004	274.093	0.05	Positive	E30	Deoxyadenosine$5'-Deoxyadenosine	-0.34499
Urea cycle/amino group metabolism	rLC_pos_mtb_650004	Milk	Milk::rLC_pos_mtb_650004	274.093	0.05	Positive	E30	Deoxyadenosine$5'-Deoxyadenosine	-0.34499
Butanoate metabolism	rLC_pos_mtb_7281758	Milk	Milk::rLC_pos_mtb_7281758	118.086	492	Positive	E44	Glycine betaine$5-Aminopentanoate; 5-Aminopentanoic acid; 5-Aminovaleric acid$L-Valine	-0.0611214
Valine, leucine and isoleucine degradation	rLC_pos_mtb_7281758	Milk	Milk::rLC_pos_mtb_7281758	118.086	492	Positive	E44	Glycine betaine$5-Aminopentanoate; 5-Aminopentanoic acid; 5-Aminovaleric acid$L-Valine	-0.0611214
C21-steroid hormone biosynthesis and metabolism	rLC_pos_mtb_8945244	Mother plasma	Mother plasma::rLC_pos_mtb_8945244	585.272	0.6324	Positive	E9	Bilirubin	-0.0495446
Porphyrin metabolism	rLC_pos_mtb_8945244	Mother plasma	Mother plasma::rLC_pos_mtb_8945244	585.272	0.6324	Positive	E9	Bilirubin	-0.0495446
Vitamin B6 (pyridoxine) metabolism	rLC_pos_mtb_895711	Milk	Milk::rLC_pos_mtb_895711	168.066	72	Positive	E85	Pyridoxal	0.653234
Alanine and Aspartate Metabolism	rLC_pos_mtb_899221	Mother plasma	Mother plasma::rLC_pos_mtb_899221	198.086	0.0764667	Positive	E5	L-Citrulline; 2-Amino-5-ureidovaleric acid; Citrulline	0.601092
Arginine and Proline Metabolism	rLC_pos_mtb_899221	Mother plasma	Mother plasma::rLC_pos_mtb_899221	198.086	0.0764667	Positive	E5	L-Citrulline; 2-Amino-5-ureidovaleric acid; Citrulline	0.601092
Aspartate and asparagine metabolism	rLC_pos_mtb_899221	Mother plasma	Mother plasma::rLC_pos_mtb_899221	198.086	0.0764667	Positive	E5	L-Citrulline; 2-Amino-5-ureidovaleric acid; Citrulline	0.601092
Urea cycle/amino group metabolism	rLC_pos_mtb_899221	Mother plasma	Mother plasma::rLC_pos_mtb_899221	198.086	0.0764667	Positive	E5	L-Citrulline; 2-Amino-5-ureidovaleric acid; Citrulline	0.601092
Keratan sulfate degradation	rLC_pos_mtb_908172	Milk	Milk::rLC_pos_mtb_908172	690.246	79	Positive	E86	(alpha-D-mannosyl)2-beta-D-mannosyl-N-acetylglucosamine	0.540891
N-Glycan Degradation	rLC_pos_mtb_908172	Milk	Milk::rLC_pos_mtb_908172	690.246	79	Positive	E86	(alpha-D-mannosyl)2-beta-D-mannosyl-N-acetylglucosamine	0.540891
Keratan sulfate degradation	rLC_pos_mtb_908577	Milk	Milk::rLC_pos_mtb_908577	709.257	72	Positive	E86	(alpha-D-mannosyl)2-beta-D-mannosyl-N-acetylglucosamine	0.00646904
N-Glycan Degradation	rLC_pos_mtb_908577	Milk	Milk::rLC_pos_mtb_908577	709.257	72	Positive	E86	(alpha-D-mannosyl)2-beta-D-mannosyl-N-acetylglucosamine	0.00646904
Butanoate metabolism	rLC_pos_mtb_9218276	Mother plasma	Mother plasma::rLC_pos_mtb_9218276	118.087	0.659267	Positive	E13	Glycine betaine$5-Aminopentanoate; 5-Aminopentanoic acid; 5-Aminovaleric acid$L-Valine	-0.0917366
Glycine, serine, alanine and threonine metabolism	rLC_pos_mtb_9218276	Mother plasma	Mother plasma::rLC_pos_mtb_9218276	118.087	0.659267	Positive	E13	Glycine betaine$5-Aminopentanoate; 5-Aminopentanoic acid; 5-Aminovaleric acid$L-Valine	-0.0917366
Valine, leucine and isoleucine degradation	rLC_pos_mtb_9218276	Mother plasma	Mother plasma::rLC_pos_mtb_9218276	118.087	0.659267	Positive	E13	Glycine betaine$5-Aminopentanoate; 5-Aminopentanoic acid; 5-Aminovaleric acid$L-Valine	-0.0917366
Butanoate metabolism	rLC_pos_mtb_945448	Mother VAMS	Mother VAMS::rLC_pos_mtb_945448	156.042	0.0847333	Positive	E5	Glycine betaine$5-Aminopentanoate; 5-Aminopentanoic acid; 5-Aminovaleric acid$L-Valine	0.439999
Glycine, serine, alanine and threonine metabolism	rLC_pos_mtb_945448	Mother VAMS	Mother VAMS::rLC_pos_mtb_945448	156.042	0.0847333	Positive	E5	Glycine betaine$5-Aminopentanoate; 5-Aminopentanoic acid; 5-Aminovaleric acid$L-Valine	0.439999
Valine, leucine and isoleucine degradation	rLC_pos_mtb_945448	Mother VAMS	Mother VAMS::rLC_pos_mtb_945448	156.042	0.0847333	Positive	E5	Glycine betaine$5-Aminopentanoate; 5-Aminopentanoic acid; 5-Aminovaleric acid$L-Valine	0.439999
Urea cycle/amino group metabolism	rLC_pos_mtb_968089	Mother plasma	Mother plasma::rLC_pos_mtb_968089	136.049	0.0785333	Positive	E9	NA	0.619894
Butanoate metabolism	rLC_pos_mtb_981395	Mother VAMS	Mother VAMS::rLC_pos_mtb_981395	140.069	0.0785333	Positive	E5	Glycine betaine$5-Aminopentanoate; 5-Aminopentanoic acid; 5-Aminovaleric acid$L-Valine	0.490978
Glycine, serine, alanine and threonine metabolism	rLC_pos_mtb_981395	Mother VAMS	Mother VAMS::rLC_pos_mtb_981395	140.069	0.0785333	Positive	E5	Glycine betaine$5-Aminopentanoate; 5-Aminopentanoic acid; 5-Aminovaleric acid$L-Valine	0.490978
Valine, leucine and isoleucine degradation	rLC_pos_mtb_981395	Mother VAMS	Mother VAMS::rLC_pos_mtb_981395	140.069	0.0785333	Positive	E5	Glycine betaine$5-Aminopentanoate; 5-Aminopentanoic acid; 5-Aminovaleric acid$L-Valine	0.490978
Keratan sulfate degradation	rLC_pos_mtb_998269	Milk	Milk::rLC_pos_mtb_998269	730.236	0.07	Positive	E86	(alpha-D-mannosyl)2-beta-D-mannosyl-N-acetylglucosamine	0.00735797
N-Glycan Degradation	rLC_pos_mtb_998269	Milk	Milk::rLC_pos_mtb_998269	730.236	0.07	Positive	E86	(alpha-D-mannosyl)2-beta-D-mannosyl-N-acetylglucosamine	0.00735797
Aspartate and asparagine metabolism	rLC_pos_mtb_9988524	Milk	Milk::rLC_pos_mtb_9988524	146.165	661	Positive	E49	dehydrospermidine$Spermidine	-0.213998
Beta-Alanine metabolism	rLC_pos_mtb_9988524	Milk	Milk::rLC_pos_mtb_9988524	146.165	661	Positive	E49	dehydrospermidine$Spermidine	-0.213998
Tyrosine metabolism	vam_1000042	Infant	Infant::vam_1000042	85.029	317	Positive	E7	Succinate semialdehyde; Succinic semialdehyde; 4-Oxobutanoate$(S)-Methylmalonate semialdehyde$2-Methyl-3-oxopropanoate; 3-Oxo-2-methylpropanoate; Methylmalonate semialdehyde$2-Oxobutanoate$Acetoacetate	0.00289052
Lysine metabolism	vam_1000052	Infant	Infant::vam_1000052	86.097	108	Positive	E23	N4-Acetylaminobutanal$L-Pipecolate; Pipecolinic acid; Pipecolic acid; 2-Piperidinecarboxylic acid	-0.013917
Beta-Alanine metabolism	vam_1000069	Infant	Infant::vam_1000069	88.04	35	Positive	E5	L-Aspartate$D-Aspartate	-0.016133
Purine metabolism	vam_1000069	Infant	Infant::vam_1000069	88.04	35	Positive	E5	L-Aspartate$D-Aspartate	-0.016133
Lysine metabolism	vam_1000072	Infant	Infant::vam_1000072	88.076	63	Positive	E61	Histone N6,N6-dimethyl-L-lysine	-0.349349
Arginine and Proline Metabolism	vam_1000144	Infant	Infant::vam_1000144	99.008	335	Positive	E1	Fumarate	-0.0110401
TCA cycle	vam_1000144	Infant	Infant::vam_1000144	99.008	335	Positive	E1	Fumarate	-0.0110401
Phytanic acid peroxisomal oxidation	vam_1000163	Infant	Infant::vam_1000163	101.024	315	Positive	E3	Methylmalonate; Methylmalonic acid$Succinate	0.00361325
Lysine metabolism	vam_1000180	Infant	Infant::vam_1000180	102.091	65	Positive	E22	N4-Acetylaminobutanal$L-Pipecolate; Pipecolinic acid; Pipecolic acid; 2-Piperidinecarboxylic acid	-0.0591941
Lysine metabolism	vam_1000181	Infant	Infant::vam_1000181	102.092	0.09	Positive	E23	N4-Acetylaminobutanal$L-Pipecolate; Pipecolinic acid; Pipecolic acid; 2-Piperidinecarboxylic acid	-0.0567643
Lysine metabolism	vam_1000182	Infant	Infant::vam_1000182	102.092	0.11	Positive	E23	N4-Acetylaminobutanal$L-Pipecolate; Pipecolinic acid; Pipecolic acid; 2-Piperidinecarboxylic acid	-0.0201319
Lysine metabolism	vam_1000198	Infant	Infant::vam_1000198	103.124	65	Positive	E61	Histone N6,N6-dimethyl-L-lysine	-0.232251
Alkaloid biosynthesis II	vam_1000219	Infant	Infant::vam_1000219	104.126	65	Positive	E3	N-Methylputrescine$Cadaverine; 1,5-Pentanediamine; 1,5-Diaminopentane; Pentamethylenediamine	-0.00201315
Beta-Alanine metabolism	vam_1000297	Infant	Infant::vam_1000297	110.071	0.1	Positive	E31	L-Histidine	-0.0137295
Beta-Alanine metabolism	vam_1000370	Infant	Infant::vam_1000370	116.035	38	Positive	E5	L-Aspartate$D-Aspartate	-0.0228005
Purine metabolism	vam_1000370	Infant	Infant::vam_1000370	116.035	38	Positive	E5	L-Aspartate$D-Aspartate	-0.0228005
Ascorbate (Vitamin C) and Aldarate Metabolism	vam_1000469	Infant	Infant::vam_1000469	121.065	323	Positive	E4	Phenylacetaldehyde; alpha-Tolualdehyde	0.159398
Tyrosine metabolism	vam_1000469	Infant	Infant::vam_1000469	121.065	323	Positive	E4	Phenylacetaldehyde; alpha-Tolualdehyde	0.159398
Vitamin E metabolism	vam_1000469	Infant	Infant::vam_1000469	121.065	323	Positive	E4	Phenylacetaldehyde; alpha-Tolualdehyde	0.159398
Alkaloid biosynthesis II	vam_1000527	Infant	Infant::vam_1000527	125.105	58	Positive	E3	N-Methylputrescine$Cadaverine; 1,5-Pentanediamine; 1,5-Diaminopentane; Pentamethylenediamine	-0.00112503
Alanine and Aspartate Metabolism	vam_1000585	Infant	Infant::vam_1000585	129.019	344	Positive	E2	2-Oxoglutarate	-0.00456498
Arginine and Proline Metabolism	vam_1000585	Infant	Infant::vam_1000585	129.019	344	Positive	E2	2-Oxoglutarate	-0.00456498
Aspartate and asparagine metabolism	vam_1000585	Infant	Infant::vam_1000585	129.019	344	Positive	E2	2-Oxoglutarate	-0.00456498
Beta-Alanine metabolism	vam_1000585	Infant	Infant::vam_1000585	129.019	344	Positive	E2	2-Oxoglutarate	-0.00456498
Butanoate metabolism	vam_1000585	Infant	Infant::vam_1000585	129.019	344	Positive	E2	2-Oxoglutarate	-0.00456498
Fatty acid oxidation, peroxisome	vam_1000585	Infant	Infant::vam_1000585	129.019	344	Positive	E2	2-Oxoglutarate	-0.00456498
Glutamate metabolism	vam_1000585	Infant	Infant::vam_1000585	129.019	344	Positive	E2	2-Oxoglutarate	-0.00456498
Glycine, serine, alanine and threonine metabolism	vam_1000585	Infant	Infant::vam_1000585	129.019	344	Positive	E2	2-Oxoglutarate	-0.00456498
Histidine metabolism	vam_1000585	Infant	Infant::vam_1000585	129.019	344	Positive	E2	2-Oxoglutarate	-0.00456498
Lysine metabolism	vam_1000585	Infant	Infant::vam_1000585	129.019	344	Positive	E2	2-Oxoglutarate	-0.00456498
Methionine and cysteine metabolism	vam_1000585	Infant	Infant::vam_1000585	129.019	344	Positive	E2	2-Oxoglutarate	-0.00456498
Phytanic acid peroxisomal oxidation	vam_1000585	Infant	Infant::vam_1000585	129.019	344	Positive	E2	2-Oxoglutarate	-0.00456498
TCA cycle	vam_1000585	Infant	Infant::vam_1000585	129.019	344	Positive	E2	2-Oxoglutarate	-0.00456498
Tryptophan metabolism	vam_1000585	Infant	Infant::vam_1000585	129.019	344	Positive	E2	2-Oxoglutarate	-0.00456498
Tyrosine metabolism	vam_1000585	Infant	Infant::vam_1000585	129.019	344	Positive	E2	2-Oxoglutarate	-0.00456498
Urea cycle/amino group metabolism	vam_1000585	Infant	Infant::vam_1000585	129.019	344	Positive	E2	2-Oxoglutarate	-0.00456498
Valine, leucine and isoleucine degradation	vam_1000585	Infant	Infant::vam_1000585	129.019	344	Positive	E2	2-Oxoglutarate	-0.00456498
Vitamin B1 (thiamin) metabolism	vam_1000585	Infant	Infant::vam_1000585	129.019	344	Positive	E2	2-Oxoglutarate	-0.00456498
Lysine metabolism	vam_1000615	Infant	Infant::vam_1000615	130.086	63	Positive	E22	N4-Acetylaminobutanal$L-Pipecolate; Pipecolinic acid; Pipecolic acid; 2-Piperidinecarboxylic acid	-0.548896
Lysine metabolism	vam_1000616	Infant	Infant::vam_1000616	130.086	0.09	Positive	E23	N4-Acetylaminobutanal$L-Pipecolate; Pipecolinic acid; Pipecolic acid; 2-Piperidinecarboxylic acid	-0.891744
Squalene and cholesterol biosynthesis	vam_1000646	Infant	Infant::vam_1000646	131.07	685	Positive	E24	(R)-Mevalonate	-0.00954208
Squalene and cholesterol biosynthesis	vam_1000647	Infant	Infant::vam_1000647	131.07	723	Positive	E24	(R)-Mevalonate	-0.00954208
Lysine metabolism	vam_1000650	Infant	Infant::vam_1000650	131.089	65	Positive	E22	N4-Acetylaminobutanal$L-Pipecolate; Pipecolinic acid; Pipecolic acid; 2-Piperidinecarboxylic acid	-0.0229834
Arginine and Proline Metabolism	vam_1000673	Infant	Infant::vam_1000673	132.066	858	Positive	E22	L-Glutamate 5-semialdehyde; L-Glutamate gamma-semialdehyde$trans-4-Hydroxy-L-proline$5-Aminolevulinate; 5-Amino-4-oxopentanoate; 5-Amino-4-oxovaleric acid$cis-4-Hydroxy-D-proline$5-Amino-2-oxopentanoic acid; 5-Amino-2-oxopentanoate; 2-Oxo-5-amino-pentanoate; 2-Oxo-5-aminopentanoate; alpha-Keto-delta-aminopentanoate; 2-Oxo-5-aminovalerate	-0.0960857
Limonene and pinene degradation	vam_1000764	Infant	Infant::vam_1000764	135.117	325	Positive	E19	Perillyl alcohol; (-)-Perillyl alcohol; p-Mentha-1,8-dien-7-ol; (-)-Perillylalcohol$(+)-trans-Carveol; (4S,6R)-trans-Carveol$$(-)-trans-Carveol	0.479373
Limonene and pinene degradation	vam_1000768	Infant	Infant::vam_1000768	135.117	527	Positive	E21	Perillyl alcohol; (-)-Perillyl alcohol; p-Mentha-1,8-dien-7-ol; (-)-Perillylalcohol$(+)-trans-Carveol; (4S,6R)-trans-Carveol$$(-)-trans-Carveol	0.0169331
Beta-Alanine metabolism	vam_1000850	Infant	Infant::vam_1000850	139.05	98	Positive	E31	L-Histidine	-0.013917
Lysine metabolism	vam_1000860	Infant	Infant::vam_1000860	139.122	98	Positive	E61	Histone N6,N6-dimethyl-L-lysine	-0.00167547
Arginine and Proline Metabolism	vam_1001032	Infant	Infant::vam_1001032	147.076	42	Positive	E26	L-Glutamine$3-Ureidoisobutyrate$D-Glutamine; D-2-Aminoglutaramic acid	-0.00982177
Pyrimidine metabolism	vam_1001032	Infant	Infant::vam_1001032	147.076	42	Positive	E26	L-Glutamine$3-Ureidoisobutyrate$D-Glutamine; D-2-Aminoglutaramic acid	-0.00982177
Lysine metabolism	vam_1001068	Infant	Infant::vam_1001068	148.097	65	Positive	E22	N4-Acetylaminobutanal$L-Pipecolate; Pipecolinic acid; Pipecolic acid; 2-Piperidinecarboxylic acid	-0.83522
Tyrosine metabolism	vam_1001113	Infant	Infant::vam_1001113	150.092	71	Positive	E35	3-Methoxytyramine$Epinine; Deoxyepinephrine	0.421708
Tyrosine metabolism	vam_1001114	Infant	Infant::vam_1001114	150.092	88	Positive	E35	3-Methoxytyramine$Epinine; Deoxyepinephrine	0.463762
Tyrosine metabolism	vam_1001134	Infant	Infant::vam_1001134	151.039	319	Positive	E8	3,4-Dihydroxymandelaldehyde$Homogentisate$3,4-Dihydroxyphenylacetate; 3,4-Dihydroxyphenylacetic acid; 3,4-Dihydroxyphenyl acetate; 3,4-Dihydroxyphenyl acetic acid; Homoprotocatechuate	0.0116187
Tyrosine metabolism	vam_1001194	Infant	Infant::vam_1001194	153.055	342	Positive	E50	3,4-Dihydroxyphenylacetaldehyde; Protocatechuatealdehyde$4-Hydroxyphenylacetate$2-Hydroxyphenylacetate	0.110953
Limonene and pinene degradation	vam_1001202	Infant	Infant::vam_1001202	153.127	325	Positive	E19	Perillyl alcohol; (-)-Perillyl alcohol; p-Mentha-1,8-dien-7-ol; (-)-Perillylalcohol$(+)-trans-Carveol; (4S,6R)-trans-Carveol$$(-)-trans-Carveol	0.207661
Beta-Alanine metabolism	vam_1001282	Infant	Infant::vam_1001282	156.027	38	Positive	E5	L-Aspartate$D-Aspartate	-0.00564042
Purine metabolism	vam_1001282	Infant	Infant::vam_1001282	156.027	38	Positive	E5	L-Aspartate$D-Aspartate	-0.00564042
Beta-Alanine metabolism	vam_1001286	Infant	Infant::vam_1001286	156.076	98	Positive	E31	L-Histidine	-0.013917
Alkaloid biosynthesis II	vam_1001292	Infant	Infant::vam_1001292	156.138	323	Positive	E74	Ecgonine methyl ester; Methyl ecgonine$ecgonine methyl ester	-0.00954208
Alkaloid biosynthesis II	vam_1001293	Infant	Infant::vam_1001293	156.138	0.34	Positive	E74	Ecgonine methyl ester; Methyl ecgonine$ecgonine methyl ester	-0.00954208
Lysine metabolism	vam_1001349	Infant	Infant::vam_1001349	158.118	77	Positive	E61	Histone N6,N6-dimethyl-L-lysine	-0.00500523
Fructose and mannose metabolism	vam_1001616	Infant	Infant::vam_1001616	165.076	42	Positive	E65	L-Iditol$D-Sorbitol$Galactitol	0.00904822
Purine metabolism	vam_1001710	Infant	Infant::vam_1001710	169.036	113	Positive	E8	Urate	0.000828961
Alkaloid biosynthesis II	vam_1001804	Infant	Infant::vam_1001804	172.134	321	Positive	E74	Ecgonine methyl ester; Methyl ecgonine$ecgonine methyl ester	-0.00954208
Alkaloid biosynthesis II	vam_1001805	Infant	Infant::vam_1001805	172.134	342	Positive	E74	Ecgonine methyl ester; Methyl ecgonine$ecgonine methyl ester	-0.187625
Tyrosine metabolism	vam_1001892	Infant	Infant::vam_1001892	175.06	333	Positive	E62	dopamine o-quinone	0.00888435
Tyrosine metabolism	vam_1001893	Infant	Infant::vam_1001893	175.061	317	Positive	E62	dopamine o-quinone	0.0165172
Lysine metabolism	vam_1001910	Infant	Infant::vam_1001910	175.144	81	Positive	E61	Histone N6,N6-dimethyl-L-lysine	-0.00178446
C21-steroid hormone biosynthesis and metabolism	vam_1001970	Infant	Infant::vam_1001970	177.109	0.36	Positive	E59	17alpha-Hydroxyprogesterone$11-Deoxycorticosterone; Deoxycorticosterone; Cortexone; 21-Hydroxy-4-pregnene-3,20-dione; Desoxycortone; DOC$11beta-Hydroxyprogesterone$17alpha-Hydroxyprogesterone; 17alpha-Hydroxy-4-pregnene-3,20-dione; Pregn-4-ene-3,20-dione-17-ol; 17alpha-Hydroxy-progesterone	0.132082
Beta-Alanine metabolism	vam_1001993	Infant	Infant::vam_1001993	178.058	85	Positive	E31	L-Histidine	-0.00544037
Alkaloid biosynthesis II	vam_1002135	Infant	Infant::vam_1002135	182.119	344	Positive	E74	Ecgonine methyl ester; Methyl ecgonine$ecgonine methyl ester	-0.015706
Lysine metabolism	vam_1002151	Infant	Infant::vam_1002151	183.025	29	Positive	E70	2-Oxoadipate	-0.0021362
Fructose and mannose metabolism	vam_1002162	Infant	Infant::vam_1002162	183.086	42	Positive	E65	L-Iditol$D-Sorbitol$Galactitol	0.0114783
Alkaloid biosynthesis II	vam_1002165	Infant	Infant::vam_1002165	183.102	323	Positive	E74	Ecgonine methyl ester; Methyl ecgonine$ecgonine methyl ester	-0.00954208
De novo fatty acid biosynthesis	vam_1002179	Infant	Infant::vam_1002179	183.211	363	Positive	E48	tetradecanoate (n-C14:0)	-0.00517882
Fatty Acid Metabolism	vam_1002179	Infant	Infant::vam_1002179	183.211	363	Positive	E48	tetradecanoate (n-C14:0)	-0.00517882
Fatty acid activation	vam_1002179	Infant	Infant::vam_1002179	183.211	363	Positive	E48	tetradecanoate (n-C14:0)	-0.00517882
Fructose and mannose metabolism	vam_1002298	Infant	Infant::vam_1002298	187.058	54	Positive	E68	6-Deoxy-L-galactose; L-Fucose	0.20403
Purine metabolism	vam_1002438	Infant	Infant::vam_1002438	191.017	85	Positive	E75	Urate	-0.00580717
De novo fatty acid biosynthesis	vam_1002552	Infant	Infant::vam_1002552	193.194	335	Positive	E48	tetradecanoate (n-C14:0)	-0.00290334
Fatty Acid Metabolism	vam_1002552	Infant	Infant::vam_1002552	193.194	335	Positive	E48	tetradecanoate (n-C14:0)	-0.00290334
Fatty acid activation	vam_1002552	Infant	Infant::vam_1002552	193.194	335	Positive	E48	tetradecanoate (n-C14:0)	-0.00290334
Beta-Alanine metabolism	vam_1002843	Infant	Infant::vam_1002843	203.223	67	Positive	E84	Spermine	-0.147012
Arachidonic acid metabolism	vam_1002960	Infant	Infant::vam_1002960	207.211	0.34	Positive	E206	(6Z,9Z,12Z)-Octadecatrienoic acid; 6,9,12-Octadecatrienoic acid; gamma-Linolenic acid; Gamolenic acid$(9Z,12Z,15Z)-Octadecatrienoic acid; alpha-Linolenic acid; 9,12,15-Octadecatrienoic acid; Linolenate; alpha-Linolenate	-0.0100952
De novo fatty acid biosynthesis	vam_1002960	Infant	Infant::vam_1002960	207.211	0.34	Positive	E206	(6Z,9Z,12Z)-Octadecatrienoic acid; 6,9,12-Octadecatrienoic acid; gamma-Linolenic acid; Gamolenic acid$(9Z,12Z,15Z)-Octadecatrienoic acid; alpha-Linolenic acid; 9,12,15-Octadecatrienoic acid; Linolenate; alpha-Linolenate	-0.0100952
Fatty acid activation	vam_1002960	Infant	Infant::vam_1002960	207.211	0.34	Positive	E206	(6Z,9Z,12Z)-Octadecatrienoic acid; 6,9,12-Octadecatrienoic acid; gamma-Linolenic acid; Gamolenic acid$(9Z,12Z,15Z)-Octadecatrienoic acid; alpha-Linolenic acid; 9,12,15-Octadecatrienoic acid; Linolenate; alpha-Linolenate	-0.0100952
Omega-3 fatty acid metabolism	vam_1002960	Infant	Infant::vam_1002960	207.211	0.34	Positive	E206	(6Z,9Z,12Z)-Octadecatrienoic acid; 6,9,12-Octadecatrienoic acid; gamma-Linolenic acid; Gamolenic acid$(9Z,12Z,15Z)-Octadecatrienoic acid; alpha-Linolenic acid; 9,12,15-Octadecatrienoic acid; Linolenate; alpha-Linolenate	-0.0100952
De novo fatty acid biosynthesis	vam_1003067	Infant	Infant::vam_1003067	211.205	352	Positive	E48	tetradecanoate (n-C14:0)	-0.202989
Fatty Acid Metabolism	vam_1003067	Infant	Infant::vam_1003067	211.205	352	Positive	E48	tetradecanoate (n-C14:0)	-0.202989
Fatty acid activation	vam_1003067	Infant	Infant::vam_1003067	211.205	352	Positive	E48	tetradecanoate (n-C14:0)	-0.202989
Vitamin B5 - CoA biosynthesis from pantothenate	vam_1003260	Infant	Infant::vam_1003260	219.108	302	Positive	E38	(R)-Pantothenate	0.147934
C21-steroid hormone biosynthesis and metabolism	vam_1003273	Infant	Infant::vam_1003273	219.21	371	Positive	E85	5alpha-Dihydrotestosterone$5beta-Dihydrotestosterone$Androsterone$3alpha-Hydroxy-5beta-androstan-17-one; Etiocholan-3alpha-ol-17-one; 3alpha-Hydroxyetiocholan-17-one$Androst-5-ene-3beta,17beta-diol; 3beta,17beta-Dihydroxyandrost-5-ene; 3beta,17beta-Dihydroxy-5-androstene; Androstenediol	0.0204524
CoA Catabolism	vam_1003290	Infant	Infant::vam_1003290	220.118	167	Positive	E17	(R)-Pantothenate	0.00967753
Vitamin B5 - CoA biosynthesis from pantothenate	vam_1003290	Infant	Infant::vam_1003290	220.118	167	Positive	E17	(R)-Pantothenate	0.00967753
Fructose and mannose metabolism	vam_1003313	Infant	Infant::vam_1003313	221.043	52	Positive	E65	L-Iditol$D-Sorbitol$Galactitol	0.00660532
Omega-3 fatty acid metabolism	vam_1003641	Infant	Infant::vam_1003641	231.21	0.36	Positive	E77	Stearidonic acid; 6,9,12,15-Octadecatetraenoic acid; (6Z,9Z,12Z,15Z)-Octadecatetraenoic acid	-0.00745846
Arachidonic acid metabolism	vam_1003712	Infant	Infant::vam_1003712	233.226	369	Positive	E204	arachidonic acid	-0.0042492
De novo fatty acid biosynthesis	vam_1003712	Infant	Infant::vam_1003712	233.226	369	Positive	E204	arachidonic acid	-0.0042492
Fatty acid activation	vam_1003712	Infant	Infant::vam_1003712	233.226	369	Positive	E204	arachidonic acid	-0.0042492
Leukotriene metabolism	vam_1003712	Infant	Infant::vam_1003712	233.226	369	Positive	E204	arachidonic acid	-0.0042492
Omega-3 fatty acid metabolism	vam_1003712	Infant	Infant::vam_1003712	233.226	369	Positive	E204	arachidonic acid	-0.0042492
Prostaglandin formation from arachidonate	vam_1003712	Infant	Infant::vam_1003712	233.226	369	Positive	E204	arachidonic acid	-0.0042492
Pyrimidine metabolism	vam_1003881	Infant	Infant::vam_1003881	237.013	492	Positive	E58	5-Deoxyribose-1-phosphate; 5-Deoxy-alpha-D-ribose-1-phosphate$2-Deoxy-D-ribose 1-phosphate$2-Deoxy-D-ribose 5-phosphate	-0.00202839
Arachidonic acid metabolism	vam_1004071	Infant	Infant::vam_1004071	243.21	363	Positive	E207	(6Z,9Z,12Z)-Octadecatrienoic acid; 6,9,12-Octadecatrienoic acid; gamma-Linolenic acid; Gamolenic acid$(9Z,12Z,15Z)-Octadecatrienoic acid; alpha-Linolenic acid; 9,12,15-Octadecatrienoic acid; Linolenate; alpha-Linolenate	-0.0144208
De novo fatty acid biosynthesis	vam_1004071	Infant	Infant::vam_1004071	243.21	363	Positive	E207	(6Z,9Z,12Z)-Octadecatrienoic acid; 6,9,12-Octadecatrienoic acid; gamma-Linolenic acid; Gamolenic acid$(9Z,12Z,15Z)-Octadecatrienoic acid; alpha-Linolenic acid; 9,12,15-Octadecatrienoic acid; Linolenate; alpha-Linolenate	-0.0144208
Fatty acid activation	vam_1004071	Infant	Infant::vam_1004071	243.21	363	Positive	E207	(6Z,9Z,12Z)-Octadecatrienoic acid; 6,9,12-Octadecatrienoic acid; gamma-Linolenic acid; Gamolenic acid$(9Z,12Z,15Z)-Octadecatrienoic acid; alpha-Linolenic acid; 9,12,15-Octadecatrienoic acid; Linolenate; alpha-Linolenate	-0.0144208
Omega-3 fatty acid metabolism	vam_1004071	Infant	Infant::vam_1004071	243.21	363	Positive	E207	(6Z,9Z,12Z)-Octadecatrienoic acid; 6,9,12-Octadecatrienoic acid; gamma-Linolenic acid; Gamolenic acid$(9Z,12Z,15Z)-Octadecatrienoic acid; alpha-Linolenic acid; 9,12,15-Octadecatrienoic acid; Linolenate; alpha-Linolenate	-0.0144208
Electron transport chain	vam_1004197	Infant	Infant::vam_1004197	247.169	333	Positive	E112	Ubiquinone	-0.448656
Fatty acid oxidation	vam_1004197	Infant	Infant::vam_1004197	247.169	333	Positive	E112	Ubiquinone	-0.448656
Pyrimidine metabolism	vam_1004197	Infant	Infant::vam_1004197	247.169	333	Positive	E112	Ubiquinone	-0.448656
TCA cycle	vam_1004197	Infant	Infant::vam_1004197	247.169	333	Positive	E112	Ubiquinone	-0.448656
C21-steroid hormone biosynthesis and metabolism	vam_1004210	Infant	Infant::vam_1004210	247.243	354	Positive	E85	5alpha-Dihydrotestosterone$5beta-Dihydrotestosterone$Androsterone$3alpha-Hydroxy-5beta-androstan-17-one; Etiocholan-3alpha-ol-17-one; 3alpha-Hydroxyetiocholan-17-one$Androst-5-ene-3beta,17beta-diol; 3beta,17beta-Dihydroxyandrost-5-ene; 3beta,17beta-Dihydroxy-5-androstene; Androstenediol	0.023975
C21-steroid hormone biosynthesis and metabolism	vam_1004429	Infant	Infant::vam_1004429	255.211	348	Positive	E85	5alpha-Dihydrotestosterone$5beta-Dihydrotestosterone$Androsterone$3alpha-Hydroxy-5beta-androstan-17-one; Etiocholan-3alpha-ol-17-one; 3alpha-Hydroxyetiocholan-17-one$Androst-5-ene-3beta,17beta-diol; 3beta,17beta-Dihydroxyandrost-5-ene; 3beta,17beta-Dihydroxy-5-androstene; Androstenediol	0.194964
Glycosphingolipid metabolism	vam_1004544	Infant	Infant::vam_1004544	258.28	0.39	Positive	E124	dihydroceramide	-0.0364686
Omega-3 fatty acid metabolism	vam_1004575	Infant	Infant::vam_1004575	259.205	346	Positive	E77	Stearidonic acid; 6,9,12,15-Octadecatetraenoic acid; (6Z,9Z,12Z,15Z)-Octadecatetraenoic acid	-0.0132302
C21-steroid hormone biosynthesis and metabolism	vam_1004576	Infant	Infant::vam_1004576	259.205	367	Positive	E59	17alpha-Hydroxyprogesterone$11-Deoxycorticosterone; Deoxycorticosterone; Cortexone; 21-Hydroxy-4-pregnene-3,20-dione; Desoxycortone; DOC$11beta-Hydroxyprogesterone$17alpha-Hydroxyprogesterone; 17alpha-Hydroxy-4-pregnene-3,20-dione; Pregn-4-ene-3,20-dione-17-ol; 17alpha-Hydroxy-progesterone	0.0324508
Fatty Acid Metabolism	vam_1004611	Infant	Infant::vam_1004611	260.258	348	Positive	E65	4,8 dimethylnonanoyl carnitine	-0.0079084
Arachidonic acid metabolism	vam_1004632	Infant	Infant::vam_1004632	261.22	371	Positive	E207	(6Z,9Z,12Z)-Octadecatrienoic acid; 6,9,12-Octadecatrienoic acid; gamma-Linolenic acid; Gamolenic acid$(9Z,12Z,15Z)-Octadecatrienoic acid; alpha-Linolenic acid; 9,12,15-Octadecatrienoic acid; Linolenate; alpha-Linolenate	-0.0131605
De novo fatty acid biosynthesis	vam_1004632	Infant	Infant::vam_1004632	261.22	371	Positive	E207	(6Z,9Z,12Z)-Octadecatrienoic acid; 6,9,12-Octadecatrienoic acid; gamma-Linolenic acid; Gamolenic acid$(9Z,12Z,15Z)-Octadecatrienoic acid; alpha-Linolenic acid; 9,12,15-Octadecatrienoic acid; Linolenate; alpha-Linolenate	-0.0131605
Fatty acid activation	vam_1004632	Infant	Infant::vam_1004632	261.22	371	Positive	E207	(6Z,9Z,12Z)-Octadecatrienoic acid; 6,9,12-Octadecatrienoic acid; gamma-Linolenic acid; Gamolenic acid$(9Z,12Z,15Z)-Octadecatrienoic acid; alpha-Linolenic acid; 9,12,15-Octadecatrienoic acid; Linolenate; alpha-Linolenate	-0.0131605
Omega-3 fatty acid metabolism	vam_1004632	Infant	Infant::vam_1004632	261.22	371	Positive	E207	(6Z,9Z,12Z)-Octadecatrienoic acid; 6,9,12-Octadecatrienoic acid; gamma-Linolenic acid; Gamolenic acid$(9Z,12Z,15Z)-Octadecatrienoic acid; alpha-Linolenic acid; 9,12,15-Octadecatrienoic acid; Linolenate; alpha-Linolenate	-0.0131605
3-oxo-10R-octadecatrienoate beta-oxidation	vam_1004746	Infant	Infant::vam_1004746	264.172	327	Positive	E55	3-oxo-8(R)-hydroxy-hexadeca-6E,10Z-dienoate$3-oxo-8(S)-hydroxy-hexadeca-6E,10Z-dienoate	0.0147956
3-oxo-10R-octadecatrienoate beta-oxidation	vam_1004747	Infant	Infant::vam_1004747	264.172	344	Positive	E55	3-oxo-8(R)-hydroxy-hexadeca-6E,10Z-dienoate$3-oxo-8(S)-hydroxy-hexadeca-6E,10Z-dienoate	0.0028155
Glycosphingolipid metabolism	vam_1005033	Infant	Infant::vam_1005033	272.294	367	Positive	E215	Phytosphingosine; 4-D-Hydroxysphinganine	0.0151161
Omega-3 fatty acid metabolism	vam_1005216	Infant	Infant::vam_1005216	277.216	0.34	Positive	E77	Stearidonic acid; 6,9,12,15-Octadecatetraenoic acid; (6Z,9Z,12Z,15Z)-Octadecatetraenoic acid	-0.0129128
Omega-3 fatty acid metabolism	vam_1005217	Infant	Infant::vam_1005217	277.216	365	Positive	E77	Stearidonic acid; 6,9,12,15-Octadecatetraenoic acid; (6Z,9Z,12Z,15Z)-Octadecatetraenoic acid	-0.0130596
Arachidonic acid metabolism	vam_1005223	Infant	Infant::vam_1005223	277.252	0.36	Positive	E204	arachidonic acid	-0.0246507
De novo fatty acid biosynthesis	vam_1005223	Infant	Infant::vam_1005223	277.252	0.36	Positive	E204	arachidonic acid	-0.0246507
Leukotriene metabolism	vam_1005223	Infant	Infant::vam_1005223	277.252	0.36	Positive	E204	arachidonic acid	-0.0246507
Prostaglandin formation from arachidonate	vam_1005223	Infant	Infant::vam_1005223	277.252	0.36	Positive	E204	arachidonic acid	-0.0246507
Omega-3 fatty acid metabolism	vam_1005252	Infant	Infant::vam_1005252	278.218	348	Positive	E77	Stearidonic acid; 6,9,12,15-Octadecatetraenoic acid; (6Z,9Z,12Z,15Z)-Octadecatetraenoic acid	-0.00436009
3-oxo-10R-octadecatrienoate beta-oxidation	vam_1005351	Infant	Infant::vam_1005351	281.174	325	Positive	E55	3-oxo-8(R)-hydroxy-hexadeca-6E,10Z-dienoate$3-oxo-8(S)-hydroxy-hexadeca-6E,10Z-dienoate	0.144917
Electron transport chain	vam_1005414	Infant	Infant::vam_1005414	283.169	381	Positive	E114	Ubiquinone	-0.00813704
Fatty acid oxidation	vam_1005414	Infant	Infant::vam_1005414	283.169	381	Positive	E114	Ubiquinone	-0.00813704
Pyrimidine metabolism	vam_1005414	Infant	Infant::vam_1005414	283.169	381	Positive	E114	Ubiquinone	-0.00813704
TCA cycle	vam_1005414	Infant	Infant::vam_1005414	283.169	381	Positive	E114	Ubiquinone	-0.00813704
Fatty acid activation	vam_1005443	Infant	Infant::vam_1005443	284.212	379	Positive	E244	timnodonic acid C20:5, n-3$timnodonate	-0.00516454
Omega-3 fatty acid metabolism	vam_1005443	Infant	Infant::vam_1005443	284.212	379	Positive	E244	timnodonic acid C20:5, n-3$timnodonate	-0.00516454
Putative anti-Inflammatory metabolites formation from EPA	vam_1005443	Infant	Infant::vam_1005443	284.212	379	Positive	E244	timnodonic acid C20:5, n-3$timnodonate	-0.00516454
De novo fatty acid biosynthesis	vam_1005496	Infant	Infant::vam_1005496	285.279	379	Positive	E89	octadecanoate (n-C18:0)	-0.00763286
Fatty Acid Metabolism	vam_1005496	Infant	Infant::vam_1005496	285.279	379	Positive	E89	octadecanoate (n-C18:0)	-0.00763286
Fatty acid activation	vam_1005496	Infant	Infant::vam_1005496	285.279	379	Positive	E89	octadecanoate (n-C18:0)	-0.00763286
Arachidonic acid metabolism	vam_1005566	Infant	Infant::vam_1005566	287.237	365	Positive	E204	arachidonic acid	-0.2686
De novo fatty acid biosynthesis	vam_1005566	Infant	Infant::vam_1005566	287.237	365	Positive	E204	arachidonic acid	-0.2686
Leukotriene metabolism	vam_1005566	Infant	Infant::vam_1005566	287.237	365	Positive	E204	arachidonic acid	-0.2686
Prostaglandin formation from arachidonate	vam_1005566	Infant	Infant::vam_1005566	287.237	365	Positive	E204	arachidonic acid	-0.2686
De novo fatty acid biosynthesis	vam_1005649	Infant	Infant::vam_1005649	289.254	335	Positive	E83	(8Z,11Z,14Z)-Icosatrienoic acid; Dihomo-gamma-linolenic acid; (Z,Z,Z)-8,11,14-Eicosatrienoic acid; (Z,Z,Z)-8,11,14-Icosatrienoic acid; (Z,Z,Z)-8,11,14-Eicosatrienoate; (Z,Z,Z)-8,11,14-Icosatrienoate; 8,11,14-Eicosatrienoate; 8,11,14-Icosatrienoate	-0.0206969
Fatty acid activation	vam_1005649	Infant	Infant::vam_1005649	289.254	335	Positive	E83	(8Z,11Z,14Z)-Icosatrienoic acid; Dihomo-gamma-linolenic acid; (Z,Z,Z)-8,11,14-Eicosatrienoic acid; (Z,Z,Z)-8,11,14-Icosatrienoic acid; (Z,Z,Z)-8,11,14-Eicosatrienoate; (Z,Z,Z)-8,11,14-Icosatrienoate; 8,11,14-Eicosatrienoate; 8,11,14-Icosatrienoate	-0.0206969
De novo fatty acid biosynthesis	vam_1005650	Infant	Infant::vam_1005650	289.253	367	Positive	E83	(8Z,11Z,14Z)-Icosatrienoic acid; Dihomo-gamma-linolenic acid; (Z,Z,Z)-8,11,14-Eicosatrienoic acid; (Z,Z,Z)-8,11,14-Icosatrienoic acid; (Z,Z,Z)-8,11,14-Eicosatrienoate; (Z,Z,Z)-8,11,14-Icosatrienoate; 8,11,14-Eicosatrienoate; 8,11,14-Icosatrienoate	-0.374729
Fatty acid activation	vam_1005650	Infant	Infant::vam_1005650	289.253	367	Positive	E83	(8Z,11Z,14Z)-Icosatrienoic acid; Dihomo-gamma-linolenic acid; (Z,Z,Z)-8,11,14-Eicosatrienoic acid; (Z,Z,Z)-8,11,14-Icosatrienoic acid; (Z,Z,Z)-8,11,14-Eicosatrienoate; (Z,Z,Z)-8,11,14-Icosatrienoate; 8,11,14-Eicosatrienoate; 8,11,14-Icosatrienoate	-0.374729
Omega-3 fatty acid metabolism	vam_1005870	Infant	Infant::vam_1005870	295.226	342	Positive	E77	Stearidonic acid; 6,9,12,15-Octadecatetraenoic acid; (6Z,9Z,12Z,15Z)-Octadecatetraenoic acid	-0.0136463
Purine metabolism	vam_1005889	Infant	Infant::vam_1005889	296.066	54	Positive	E20	5-amino-1-(5-phospho-D-ribosyl)imidazole	0.575401
Purine metabolism	vam_1005933	Infant	Infant::vam_1005933	297.069	54	Positive	E20	5-amino-1-(5-phospho-D-ribosyl)imidazole	0.00325183
Arachidonic acid metabolism	vam_1005957	Infant	Infant::vam_1005957	297.24	338	Positive	E206	(6Z,9Z,12Z)-Octadecatrienoic acid; 6,9,12-Octadecatrienoic acid; gamma-Linolenic acid; Gamolenic acid$(9Z,12Z,15Z)-Octadecatrienoic acid; alpha-Linolenic acid; 9,12,15-Octadecatrienoic acid; Linolenate; alpha-Linolenate	-0.228483
De novo fatty acid biosynthesis	vam_1005957	Infant	Infant::vam_1005957	297.24	338	Positive	E206	(6Z,9Z,12Z)-Octadecatrienoic acid; 6,9,12-Octadecatrienoic acid; gamma-Linolenic acid; Gamolenic acid$(9Z,12Z,15Z)-Octadecatrienoic acid; alpha-Linolenic acid; 9,12,15-Octadecatrienoic acid; Linolenate; alpha-Linolenate	-0.228483
Fatty acid activation	vam_1005957	Infant	Infant::vam_1005957	297.24	338	Positive	E206	(6Z,9Z,12Z)-Octadecatrienoic acid; 6,9,12-Octadecatrienoic acid; gamma-Linolenic acid; Gamolenic acid$(9Z,12Z,15Z)-Octadecatrienoic acid; alpha-Linolenic acid; 9,12,15-Octadecatrienoic acid; Linolenate; alpha-Linolenate	-0.228483
Omega-3 fatty acid metabolism	vam_1005957	Infant	Infant::vam_1005957	297.24	338	Positive	E206	(6Z,9Z,12Z)-Octadecatrienoic acid; 6,9,12-Octadecatrienoic acid; gamma-Linolenic acid; Gamolenic acid$(9Z,12Z,15Z)-Octadecatrienoic acid; alpha-Linolenic acid; 9,12,15-Octadecatrienoic acid; Linolenate; alpha-Linolenate	-0.228483
Arginine and Proline Metabolism	vam_1005972	Infant	Infant::vam_1005972	298.096	346	Positive	E73	5-Methylthioadenosine	-0.00354136
Omega-3 fatty acid metabolism	vam_1006016	Infant	Infant::vam_1006016	299.201	358	Positive	E77	Stearidonic acid; 6,9,12,15-Octadecatetraenoic acid; (6Z,9Z,12Z,15Z)-Octadecatetraenoic acid	-0.331036
Glycosphingolipid metabolism	vam_1006062	Infant	Infant::vam_1006062	300.289	371	Positive	E215	Phytosphingosine; 4-D-Hydroxysphinganine	0.0127237
Glycosphingolipid metabolism	vam_1006063	Infant	Infant::vam_1006063	300.289	383	Positive	E215	Phytosphingosine; 4-D-Hydroxysphinganine	0.00813672
Arachidonic acid metabolism	vam_1006104	Infant	Infant::vam_1006104	301.216	338	Positive	E138	5-Hydroperoxy-6-trans-8,11,14-cis-eicosatetraenoate$Prostaglandin B1$(13E)-(15S)-15-Hydroxy-9-oxoprosta-10,13-dienoate; Prostaglandin A1; PGA1$(13E)-(15S)-15-Hydroxy-9-oxoprosta-11,13-dienoate; Prostaglandin C1$15(S)-HPETE; (5Z,8Z,11Z,13E)-(15S)-15-Hydroperoxyicosa-5,8,11,13-tetraenoic acid; 15-Hydroperoxyeicosatetraenoate; 15-Hydroperoxyicosatetraenoate; 15-Hydroperoxyeicosatetraenoic acid; 15-H…	-0.355442
De novo fatty acid biosynthesis	vam_1006104	Infant	Infant::vam_1006104	301.216	338	Positive	E138	5-Hydroperoxy-6-trans-8,11,14-cis-eicosatetraenoate$Prostaglandin B1$(13E)-(15S)-15-Hydroxy-9-oxoprosta-10,13-dienoate; Prostaglandin A1; PGA1$(13E)-(15S)-15-Hydroxy-9-oxoprosta-11,13-dienoate; Prostaglandin C1$15(S)-HPETE; (5Z,8Z,11Z,13E)-(15S)-15-Hydroperoxyicosa-5,8,11,13-tetraenoic acid; 15-Hydroperoxyeicosatetraenoate; 15-Hydroperoxyicosatetraenoate; 15-Hydroperoxyeicosatetraenoic acid; 15-H…	-0.355442
Fatty acid activation	vam_1006104	Infant	Infant::vam_1006104	301.216	338	Positive	E138	5-Hydroperoxy-6-trans-8,11,14-cis-eicosatetraenoate$Prostaglandin B1$(13E)-(15S)-15-Hydroxy-9-oxoprosta-10,13-dienoate; Prostaglandin A1; PGA1$(13E)-(15S)-15-Hydroxy-9-oxoprosta-11,13-dienoate; Prostaglandin C1$15(S)-HPETE; (5Z,8Z,11Z,13E)-(15S)-15-Hydroperoxyicosa-5,8,11,13-tetraenoic acid; 15-Hydroperoxyeicosatetraenoate; 15-Hydroperoxyicosatetraenoate; 15-Hydroperoxyeicosatetraenoic acid; 15-H…	-0.355442
Leukotriene metabolism	vam_1006104	Infant	Infant::vam_1006104	301.216	338	Positive	E138	5-Hydroperoxy-6-trans-8,11,14-cis-eicosatetraenoate$Prostaglandin B1$(13E)-(15S)-15-Hydroxy-9-oxoprosta-10,13-dienoate; Prostaglandin A1; PGA1$(13E)-(15S)-15-Hydroxy-9-oxoprosta-11,13-dienoate; Prostaglandin C1$15(S)-HPETE; (5Z,8Z,11Z,13E)-(15S)-15-Hydroperoxyicosa-5,8,11,13-tetraenoic acid; 15-Hydroperoxyeicosatetraenoate; 15-Hydroperoxyicosatetraenoate; 15-Hydroperoxyeicosatetraenoic acid; 15-H…	-0.355442
Omega-3 fatty acid metabolism	vam_1006104	Infant	Infant::vam_1006104	301.216	338	Positive	E138	5-Hydroperoxy-6-trans-8,11,14-cis-eicosatetraenoate$Prostaglandin B1$(13E)-(15S)-15-Hydroxy-9-oxoprosta-10,13-dienoate; Prostaglandin A1; PGA1$(13E)-(15S)-15-Hydroxy-9-oxoprosta-11,13-dienoate; Prostaglandin C1$15(S)-HPETE; (5Z,8Z,11Z,13E)-(15S)-15-Hydroperoxyicosa-5,8,11,13-tetraenoic acid; 15-Hydroperoxyeicosatetraenoate; 15-Hydroperoxyicosatetraenoate; 15-Hydroperoxyeicosatetraenoic acid; 15-H…	-0.355442
Prostaglandin formation from arachidonate	vam_1006104	Infant	Infant::vam_1006104	301.216	338	Positive	E138	5-Hydroperoxy-6-trans-8,11,14-cis-eicosatetraenoate$Prostaglandin B1$(13E)-(15S)-15-Hydroxy-9-oxoprosta-10,13-dienoate; Prostaglandin A1; PGA1$(13E)-(15S)-15-Hydroxy-9-oxoprosta-11,13-dienoate; Prostaglandin C1$15(S)-HPETE; (5Z,8Z,11Z,13E)-(15S)-15-Hydroperoxyicosa-5,8,11,13-tetraenoic acid; 15-Hydroperoxyeicosatetraenoate; 15-Hydroperoxyicosatetraenoate; 15-Hydroperoxyeicosatetraenoic acid; 15-H…	-0.355442
Glycosphingolipid metabolism	vam_1006149	Infant	Infant::vam_1006149	302.306	485	Positive	E96	Sphinganine	0.00536688
Vitamin B5 - CoA biosynthesis from pantothenate	vam_1006266	Infant	Infant::vam_1006266	305.115	842	Positive	E62	N-((R)-Pantothenoyl)-L-cysteine; D-Pantothenoyl-L-cysteine; N-Pantothenoylcysteine	0.00427224
De novo fatty acid biosynthesis	vam_1006344	Infant	Infant::vam_1006344	307.262	369	Positive	E83	(8Z,11Z,14Z)-Icosatrienoic acid; Dihomo-gamma-linolenic acid; (Z,Z,Z)-8,11,14-Eicosatrienoic acid; (Z,Z,Z)-8,11,14-Icosatrienoic acid; (Z,Z,Z)-8,11,14-Eicosatrienoate; (Z,Z,Z)-8,11,14-Icosatrienoate; 8,11,14-Eicosatrienoate; 8,11,14-Icosatrienoate	-0.469819
Fatty Acid Metabolism	vam_1006344	Infant	Infant::vam_1006344	307.262	369	Positive	E83	(8Z,11Z,14Z)-Icosatrienoic acid; Dihomo-gamma-linolenic acid; (Z,Z,Z)-8,11,14-Eicosatrienoic acid; (Z,Z,Z)-8,11,14-Icosatrienoic acid; (Z,Z,Z)-8,11,14-Eicosatrienoate; (Z,Z,Z)-8,11,14-Icosatrienoate; 8,11,14-Eicosatrienoate; 8,11,14-Icosatrienoate	-0.469819
Fatty acid activation	vam_1006344	Infant	Infant::vam_1006344	307.262	369	Positive	E83	(8Z,11Z,14Z)-Icosatrienoic acid; Dihomo-gamma-linolenic acid; (Z,Z,Z)-8,11,14-Eicosatrienoic acid; (Z,Z,Z)-8,11,14-Icosatrienoic acid; (Z,Z,Z)-8,11,14-Eicosatrienoate; (Z,Z,Z)-8,11,14-Icosatrienoate; 8,11,14-Eicosatrienoate; 8,11,14-Icosatrienoate	-0.469819
Prostaglandin formation from arachidonate	vam_1006344	Infant	Infant::vam_1006344	307.262	369	Positive	E83	(8Z,11Z,14Z)-Icosatrienoic acid; Dihomo-gamma-linolenic acid; (Z,Z,Z)-8,11,14-Eicosatrienoic acid; (Z,Z,Z)-8,11,14-Icosatrienoic acid; (Z,Z,Z)-8,11,14-Eicosatrienoate; (Z,Z,Z)-8,11,14-Icosatrienoate; 8,11,14-Eicosatrienoate; 8,11,14-Icosatrienoate	-0.469819
De novo fatty acid biosynthesis	vam_1006601	Infant	Infant::vam_1006601	313.179	365	Positive	E48	tetradecanoate (n-C14:0)	-0.00701781
Fatty Acid Metabolism	vam_1006601	Infant	Infant::vam_1006601	313.179	365	Positive	E48	tetradecanoate (n-C14:0)	-0.00701781
Fatty acid activation	vam_1006601	Infant	Infant::vam_1006601	313.179	365	Positive	E48	tetradecanoate (n-C14:0)	-0.00701781
C21-steroid hormone biosynthesis and metabolism	vam_1006606	Infant	Infant::vam_1006606	313.216	352	Positive	E59	17alpha-Hydroxyprogesterone$11-Deoxycorticosterone; Deoxycorticosterone; Cortexone; 21-Hydroxy-4-pregnene-3,20-dione; Desoxycortone; DOC$11beta-Hydroxyprogesterone$17alpha-Hydroxyprogesterone; 17alpha-Hydroxy-4-pregnene-3,20-dione; Pregn-4-ene-3,20-dione-17-ol; 17alpha-Hydroxy-progesterone	0.115838
Fatty Acid Metabolism	vam_1006650	Infant	Infant::vam_1006650	314.27	354	Positive	E65	4,8 dimethylnonanoyl carnitine	-0.0197629
Putative anti-Inflammatory metabolites formation from EPA	vam_1006686	Infant	Infant::vam_1006686	315.196	356	Positive	E155	(5Z,13E)-11alpha-Hydroxy-9,15-dioxoprost-13-enoate; (5Z)-(15S)-11alpha-Hydroxy-9,15-dioxoprosta-13-enoate$Prostaglandin E3	-0.370925
Putative anti-Inflammatory metabolites formation from EPA	vam_1006687	Infant	Infant::vam_1006687	315.196	371	Positive	E155	(5Z,13E)-11alpha-Hydroxy-9,15-dioxoprost-13-enoate; (5Z)-(15S)-11alpha-Hydroxy-9,15-dioxoprosta-13-enoate$Prostaglandin E3	-0.226697
Electron transport chain	vam_1006850	Infant	Infant::vam_1006850	319.191	325	Positive	E112	Ubiquinone	-0.0123758
Fatty acid oxidation	vam_1006850	Infant	Infant::vam_1006850	319.191	325	Positive	E112	Ubiquinone	-0.0123758
Leukotriene metabolism	vam_1006850	Infant	Infant::vam_1006850	319.191	325	Positive	E112	Ubiquinone	-0.0123758
Pyrimidine metabolism	vam_1006850	Infant	Infant::vam_1006850	319.191	325	Positive	E112	Ubiquinone	-0.0123758
TCA cycle	vam_1006850	Infant	Infant::vam_1006850	319.191	325	Positive	E112	Ubiquinone	-0.0123758
Electron transport chain	vam_1006851	Infant	Infant::vam_1006851	319.19	392	Positive	E114	Ubiquinone	-0.0149233
Fatty acid oxidation	vam_1006851	Infant	Infant::vam_1006851	319.19	392	Positive	E114	Ubiquinone	-0.0149233
Pyrimidine metabolism	vam_1006851	Infant	Infant::vam_1006851	319.19	392	Positive	E114	Ubiquinone	-0.0149233
TCA cycle	vam_1006851	Infant	Infant::vam_1006851	319.19	392	Positive	E114	Ubiquinone	-0.0149233
Electron transport chain	vam_1006897	Infant	Infant::vam_1006897	320.194	0.39	Positive	E114	Ubiquinone	-0.00444876
Fatty acid oxidation	vam_1006897	Infant	Infant::vam_1006897	320.194	0.39	Positive	E114	Ubiquinone	-0.00444876
Pyrimidine metabolism	vam_1006897	Infant	Infant::vam_1006897	320.194	0.39	Positive	E114	Ubiquinone	-0.00444876
TCA cycle	vam_1006897	Infant	Infant::vam_1006897	320.194	0.39	Positive	E114	Ubiquinone	-0.00444876
Leukotriene metabolism	vam_1006939	Infant	Infant::vam_1006939	321.206	327	Positive	E107	20-carboxy-leukotriene-B4$12-oxo-10,11-dihydro-20-COOH-LTB4	-0.0152657
Arachidonic acid metabolism	vam_1007008	Infant	Infant::vam_1007008	323.256	354	Positive	E204	arachidonic acid	-0.0191512
De novo fatty acid biosynthesis	vam_1007008	Infant	Infant::vam_1007008	323.256	354	Positive	E204	arachidonic acid	-0.0191512
Leukotriene metabolism	vam_1007008	Infant	Infant::vam_1007008	323.256	354	Positive	E204	arachidonic acid	-0.0191512
Prostaglandin formation from arachidonate	vam_1007008	Infant	Infant::vam_1007008	323.256	354	Positive	E204	arachidonic acid	-0.0191512
Leukotriene metabolism	vam_1007238	Infant	Infant::vam_1007238	329.175	335	Positive	E107	20-carboxy-leukotriene-B4$12-oxo-10,11-dihydro-20-COOH-LTB4	-0.00761476
De novo fatty acid biosynthesis	vam_1007245	Infant	Infant::vam_1007245	329.246	352	Positive	E83	(8Z,11Z,14Z)-Icosatrienoic acid; Dihomo-gamma-linolenic acid; (Z,Z,Z)-8,11,14-Eicosatrienoic acid; (Z,Z,Z)-8,11,14-Icosatrienoic acid; (Z,Z,Z)-8,11,14-Eicosatrienoate; (Z,Z,Z)-8,11,14-Icosatrienoate; 8,11,14-Eicosatrienoate; 8,11,14-Icosatrienoate	-0.0167763
Fatty acid activation	vam_1007245	Infant	Infant::vam_1007245	329.246	352	Positive	E83	(8Z,11Z,14Z)-Icosatrienoic acid; Dihomo-gamma-linolenic acid; (Z,Z,Z)-8,11,14-Eicosatrienoic acid; (Z,Z,Z)-8,11,14-Icosatrienoic acid; (Z,Z,Z)-8,11,14-Eicosatrienoate; (Z,Z,Z)-8,11,14-Icosatrienoate; 8,11,14-Eicosatrienoate; 8,11,14-Icosatrienoate	-0.0167763
Glycosphingolipid metabolism	vam_1007286	Infant	Infant::vam_1007286	330.299	388	Positive	E124	dihydroceramide	-0.00540921
Purine metabolism	vam_1007407	Infant	Infant::vam_1007407	333.062	342	Positive	E149	2'-Deoxyinosine 5'-phosphate; dIMP	-0.00405856
Arachidonic acid metabolism	vam_1007616	Infant	Infant::vam_1007616	338.238	335	Positive	E138	5-Hydroperoxy-6-trans-8,11,14-cis-eicosatetraenoate$Prostaglandin B1$(13E)-(15S)-15-Hydroxy-9-oxoprosta-10,13-dienoate; Prostaglandin A1; PGA1$(13E)-(15S)-15-Hydroxy-9-oxoprosta-11,13-dienoate; Prostaglandin C1$15(S)-HPETE; (5Z,8Z,11Z,13E)-(15S)-15-Hydroperoxyicosa-5,8,11,13-tetraenoic acid; 15-Hydroperoxyeicosatetraenoate; 15-Hydroperoxyicosatetraenoate; 15-Hydroperoxyeicosatetraenoic acid; 15-H…	-0.0116209
Leukotriene metabolism	vam_1007616	Infant	Infant::vam_1007616	338.238	335	Positive	E138	5-Hydroperoxy-6-trans-8,11,14-cis-eicosatetraenoate$Prostaglandin B1$(13E)-(15S)-15-Hydroxy-9-oxoprosta-10,13-dienoate; Prostaglandin A1; PGA1$(13E)-(15S)-15-Hydroxy-9-oxoprosta-11,13-dienoate; Prostaglandin C1$15(S)-HPETE; (5Z,8Z,11Z,13E)-(15S)-15-Hydroperoxyicosa-5,8,11,13-tetraenoic acid; 15-Hydroperoxyeicosatetraenoate; 15-Hydroperoxyicosatetraenoate; 15-Hydroperoxyeicosatetraenoic acid; 15-H…	-0.0116209
Prostaglandin formation from arachidonate	vam_1007616	Infant	Infant::vam_1007616	338.238	335	Positive	E138	5-Hydroperoxy-6-trans-8,11,14-cis-eicosatetraenoate$Prostaglandin B1$(13E)-(15S)-15-Hydroxy-9-oxoprosta-10,13-dienoate; Prostaglandin A1; PGA1$(13E)-(15S)-15-Hydroxy-9-oxoprosta-11,13-dienoate; Prostaglandin C1$15(S)-HPETE; (5Z,8Z,11Z,13E)-(15S)-15-Hydroperoxyicosa-5,8,11,13-tetraenoic acid; 15-Hydroperoxyeicosatetraenoate; 15-Hydroperoxyicosatetraenoate; 15-Hydroperoxyeicosatetraenoic acid; 15-H…	-0.0116209
Prostaglandin formation from arachidonate	vam_1007665	Infant	Infant::vam_1007665	339.253	335	Positive	E200	12-hydroperoxyeicosatetraenoate glyceryl ester	-0.26499
C21-steroid hormone biosynthesis and metabolism	vam_1007825	Infant	Infant::vam_1007825	343.189	319	Positive	E109	Cortisone; 17alpha,21-Dihydroxy-4-pregnene-3,11,20-trione; Kendall's compound E; Reichstein's substance Fa$Aldosterone; 11beta,21-Dihydroxy-3,20-dioxo-4-pregnen-18-al	0.00323037
Prostaglandin formation from arachidonate	vam_1007841	Infant	Infant::vam_1007841	343.264	358	Positive	E90	2-Arachidonoylglycerol; 2-Arachidonoyl-sn-glycerol	-0.0216439
Leukotriene metabolism	vam_1007994	Infant	Infant::vam_1007994	347.185	323	Positive	E107	20-carboxy-leukotriene-B4$12-oxo-10,11-dihydro-20-COOH-LTB4	-0.00874531
Leukotriene metabolism	vam_1007995	Infant	Infant::vam_1007995	347.187	338	Positive	E107	20-carboxy-leukotriene-B4$12-oxo-10,11-dihydro-20-COOH-LTB4	-0.00894742
Arachidonic acid metabolism	vam_1008117	Infant	Infant::vam_1008117	350.212	365	Positive	E260	$20-oxo-leukotriene B4$12-oxo-20-hydroxy-leukotriene B4$15-oxo-lipoxin A4$20-hydroxy-leukotriene B5$15-epi-lipoxin B5$15-epi-lipoxin A5$PGH3	-0.0248808
Leukotriene metabolism	vam_1008117	Infant	Infant::vam_1008117	350.212	365	Positive	E260	$20-oxo-leukotriene B4$12-oxo-20-hydroxy-leukotriene B4$15-oxo-lipoxin A4$20-hydroxy-leukotriene B5$15-epi-lipoxin B5$15-epi-lipoxin A5$PGH3	-0.0248808
Prostaglandin formation from arachidonate	vam_1008117	Infant	Infant::vam_1008117	350.212	365	Positive	E260	$20-oxo-leukotriene B4$12-oxo-20-hydroxy-leukotriene B4$15-oxo-lipoxin A4$20-hydroxy-leukotriene B5$15-epi-lipoxin B5$15-epi-lipoxin A5$PGH3	-0.0248808
Putative anti-Inflammatory metabolites formation from EPA	vam_1008117	Infant	Infant::vam_1008117	350.212	365	Positive	E260	$20-oxo-leukotriene B4$12-oxo-20-hydroxy-leukotriene B4$15-oxo-lipoxin A4$20-hydroxy-leukotriene B5$15-epi-lipoxin B5$15-epi-lipoxin A5$PGH3	-0.0248808
Putative anti-Inflammatory metabolites formation from EPA	vam_1008152	Infant	Infant::vam_1008152	351.216	348	Positive	E155	(5Z,13E)-11alpha-Hydroxy-9,15-dioxoprost-13-enoate; (5Z)-(15S)-11alpha-Hydroxy-9,15-dioxoprosta-13-enoate$Prostaglandin E3	-0.019032
Prostaglandin formation from arachidonate	vam_1008427	Infant	Infant::vam_1008427	358.208	0.35	Positive	E113	6E-12-epi-LTB4$9-deoxy-delta12-PGD2$12,20-DiHETE$6-trans-leukotriene B4$14,15-DiHETE$6,7-dihydro-5-oxo-leukotriene B4$20-hydroxy-5S-HETE$6,7-dihydro-5-oxo-12-epi-LTB4$5,15-DiHETE$10,11-dihydro-12-oxo-LTB4	0.00501194
Arachidonic acid metabolism	vam_1008475	Infant	Infant::vam_1008475	359.219	333	Positive	E138	5-Hydroperoxy-6-trans-8,11,14-cis-eicosatetraenoate$Prostaglandin B1$(13E)-(15S)-15-Hydroxy-9-oxoprosta-10,13-dienoate; Prostaglandin A1; PGA1$(13E)-(15S)-15-Hydroxy-9-oxoprosta-11,13-dienoate; Prostaglandin C1$15(S)-HPETE; (5Z,8Z,11Z,13E)-(15S)-15-Hydroperoxyicosa-5,8,11,13-tetraenoic acid; 15-Hydroperoxyeicosatetraenoate; 15-Hydroperoxyicosatetraenoate; 15-Hydroperoxyeicosatetraenoic acid; 15-H…	-0.00858869
Leukotriene metabolism	vam_1008475	Infant	Infant::vam_1008475	359.219	333	Positive	E138	5-Hydroperoxy-6-trans-8,11,14-cis-eicosatetraenoate$Prostaglandin B1$(13E)-(15S)-15-Hydroxy-9-oxoprosta-10,13-dienoate; Prostaglandin A1; PGA1$(13E)-(15S)-15-Hydroxy-9-oxoprosta-11,13-dienoate; Prostaglandin C1$15(S)-HPETE; (5Z,8Z,11Z,13E)-(15S)-15-Hydroperoxyicosa-5,8,11,13-tetraenoic acid; 15-Hydroperoxyeicosatetraenoate; 15-Hydroperoxyicosatetraenoate; 15-Hydroperoxyeicosatetraenoic acid; 15-H…	-0.00858869
Prostaglandin formation from arachidonate	vam_1008475	Infant	Infant::vam_1008475	359.219	333	Positive	E138	5-Hydroperoxy-6-trans-8,11,14-cis-eicosatetraenoate$Prostaglandin B1$(13E)-(15S)-15-Hydroxy-9-oxoprosta-10,13-dienoate; Prostaglandin A1; PGA1$(13E)-(15S)-15-Hydroxy-9-oxoprosta-11,13-dienoate; Prostaglandin C1$15(S)-HPETE; (5Z,8Z,11Z,13E)-(15S)-15-Hydroperoxyicosa-5,8,11,13-tetraenoic acid; 15-Hydroperoxyeicosatetraenoate; 15-Hydroperoxyicosatetraenoate; 15-Hydroperoxyeicosatetraenoic acid; 15-H…	-0.00858869
Vitamin D3 (cholecalciferol) metabolism	vam_1008483	Infant	Infant::vam_1008483	359.258	344	Positive	E67	24,25,26,27-tetranor-23-oxo-hydroxyvitamin D3	0.00780191
C21-steroid hormone biosynthesis and metabolism	vam_1008637	Infant	Infant::vam_1008637	363.218	321	Positive	E118	18-Hydroxycorticosterone$17alpha,21-Dihydroxy-5beta-pregnane-3,11,20-trione; 5beta-Pregnane-17alpha,21-diol-3,11,20-trione; 4,5beta-Dihydrocortisone$Cortisol; Hydrocortisone; 11beta,17alpha,21-Trihydroxy-4-pregnene-3,20-dione; Kendall's compound F; Reichstein's substance M$11beta,21-Dihydroxy-3,20-oxo-5beta-pregnan-18-al	0.00203977
Purine metabolism	vam_1008665	Infant	Infant::vam_1008665	364.053	54	Positive	E125	5-amino-1-(5-phospho-D-ribosyl)imidazole	-0.0101211
Leukotriene metabolism	vam_1008719	Infant	Infant::vam_1008719	365.196	319	Positive	E107	20-carboxy-leukotriene-B4$12-oxo-10,11-dihydro-20-COOH-LTB4	-0.0108141
Leukotriene metabolism	vam_1008720	Infant	Infant::vam_1008720	365.197	0.34	Positive	E107	20-carboxy-leukotriene-B4$12-oxo-10,11-dihydro-20-COOH-LTB4	-0.00514292
Squalene and cholesterol biosynthesis	vam_1008840	Infant	Infant::vam_1008840	367.336	398	Positive	E147	Desmosterol; 24-Dehydrocholesterol; Cholesta-5,24-dien-3beta-ol$Cholest-4-en-3-one; Cholestenone; 4-Cholesten-3-one$Zymosterol; delta8,24-Cholestadien-3beta-ol; 5alpha-Cholesta-8,24-dien-3beta-ol$5alpha-Cholesta-7,24-dien-3beta-ol$Cholesta-5,7-dien-3beta-ol; 7-Dehydrocholesterol; Provitamin D3$Vitamin D3; Cholecalciferol	-0.00817596
Vitamin D	vam_1008840	Infant	Infant::vam_1008840	367.336	398	Positive	E147	Desmosterol; 24-Dehydrocholesterol; Cholesta-5,24-dien-3beta-ol$Cholest-4-en-3-one; Cholestenone; 4-Cholesten-3-one$Zymosterol; delta8,24-Cholestadien-3beta-ol; 5alpha-Cholesta-8,24-dien-3beta-ol$5alpha-Cholesta-7,24-dien-3beta-ol$Cholesta-5,7-dien-3beta-ol; 7-Dehydrocholesterol; Provitamin D3$Vitamin D3; Cholecalciferol	-0.00817596
Squalene and cholesterol biosynthesis	vam_1008841	Infant	Infant::vam_1008841	367.336	427	Positive	E148	Desmosterol; 24-Dehydrocholesterol; Cholesta-5,24-dien-3beta-ol$Cholest-4-en-3-one; Cholestenone; 4-Cholesten-3-one$Zymosterol; delta8,24-Cholestadien-3beta-ol; 5alpha-Cholesta-8,24-dien-3beta-ol$5alpha-Cholesta-7,24-dien-3beta-ol$Cholesta-5,7-dien-3beta-ol; 7-Dehydrocholesterol; Provitamin D3$Vitamin D3; Cholecalciferol	-0.00538635
Vitamin D	vam_1008841	Infant	Infant::vam_1008841	367.336	427	Positive	E148	Desmosterol; 24-Dehydrocholesterol; Cholesta-5,24-dien-3beta-ol$Cholest-4-en-3-one; Cholestenone; 4-Cholesten-3-one$Zymosterol; delta8,24-Cholestadien-3beta-ol; 5alpha-Cholesta-8,24-dien-3beta-ol$5alpha-Cholesta-7,24-dien-3beta-ol$Cholesta-5,7-dien-3beta-ol; 7-Dehydrocholesterol; Provitamin D3$Vitamin D3; Cholecalciferol	-0.00538635
Prostaglandin formation from arachidonate	vam_1008910	Infant	Infant::vam_1008910	369.226	325	Positive	E151	$Prostaglandin G2; PGG2	-0.0106023
Prostaglandin formation from arachidonate	vam_1008911	Infant	Infant::vam_1008911	369.226	335	Positive	E117	$Prostaglandin G2; PGG2	0.0033379
Purine metabolism	vam_1009064	Infant	Infant::vam_1009064	372.035	56	Positive	E122	2-(Formamido)-N1-(5-phospho-D-ribosyl)acetamidine	-0.00930905
Arachidonic acid metabolism	vam_1009119	Infant	Infant::vam_1009119	373.237	358	Positive	E204	arachidonic acid	-0.0109899
De novo fatty acid biosynthesis	vam_1009119	Infant	Infant::vam_1009119	373.237	358	Positive	E204	arachidonic acid	-0.0109899
Leukotriene metabolism	vam_1009119	Infant	Infant::vam_1009119	373.237	358	Positive	E204	arachidonic acid	-0.0109899
Prostaglandin formation from arachidonate	vam_1009119	Infant	Infant::vam_1009119	373.237	358	Positive	E204	arachidonic acid	-0.0109899
De novo fatty acid biosynthesis	vam_1009221	Infant	Infant::vam_1009221	375.253	356	Positive	E83	(8Z,11Z,14Z)-Icosatrienoic acid; Dihomo-gamma-linolenic acid; (Z,Z,Z)-8,11,14-Eicosatrienoic acid; (Z,Z,Z)-8,11,14-Icosatrienoic acid; (Z,Z,Z)-8,11,14-Eicosatrienoate; (Z,Z,Z)-8,11,14-Icosatrienoate; 8,11,14-Eicosatrienoate; 8,11,14-Icosatrienoate	-0.337922
Fatty acid activation	vam_1009221	Infant	Infant::vam_1009221	375.253	356	Positive	E83	(8Z,11Z,14Z)-Icosatrienoic acid; Dihomo-gamma-linolenic acid; (Z,Z,Z)-8,11,14-Eicosatrienoic acid; (Z,Z,Z)-8,11,14-Icosatrienoic acid; (Z,Z,Z)-8,11,14-Eicosatrienoate; (Z,Z,Z)-8,11,14-Icosatrienoate; 8,11,14-Eicosatrienoate; 8,11,14-Icosatrienoate	-0.337922
Prostaglandin formation from arachidonate	vam_1009221	Infant	Infant::vam_1009221	375.253	356	Positive	E83	(8Z,11Z,14Z)-Icosatrienoic acid; Dihomo-gamma-linolenic acid; (Z,Z,Z)-8,11,14-Eicosatrienoic acid; (Z,Z,Z)-8,11,14-Icosatrienoic acid; (Z,Z,Z)-8,11,14-Eicosatrienoate; (Z,Z,Z)-8,11,14-Icosatrienoate; 8,11,14-Eicosatrienoate; 8,11,14-Icosatrienoate	-0.337922
Prostaglandin formation from arachidonate	vam_1009380	Infant	Infant::vam_1009380	379.284	365	Positive	E90	2-Arachidonoylglycerol; 2-Arachidonoyl-sn-glycerol	-0.411947
Squalene and cholesterol biosynthesis	vam_1009594	Infant	Infant::vam_1009594	383.371	427	Positive	E168	Campesterol$Lophenol; 4-Methylcholest-7-en-3-ol; 4alpha-Methyl-5alpha-cholest-7-en-3beta-ol	-0.00270735
Squalene and cholesterol biosynthesis	vam_1009702	Infant	Infant::vam_1009702	385.346	427	Positive	E148	Desmosterol; 24-Dehydrocholesterol; Cholesta-5,24-dien-3beta-ol$Cholest-4-en-3-one; Cholestenone; 4-Cholesten-3-one$Zymosterol; delta8,24-Cholestadien-3beta-ol; 5alpha-Cholesta-8,24-dien-3beta-ol$5alpha-Cholesta-7,24-dien-3beta-ol$Cholesta-5,7-dien-3beta-ol; 7-Dehydrocholesterol; Provitamin D3$Vitamin D3; Cholecalciferol	-0.0487318
Vitamin D	vam_1009702	Infant	Infant::vam_1009702	385.346	427	Positive	E148	Desmosterol; 24-Dehydrocholesterol; Cholesta-5,24-dien-3beta-ol$Cholest-4-en-3-one; Cholestenone; 4-Cholesten-3-one$Zymosterol; delta8,24-Cholestadien-3beta-ol; 5alpha-Cholesta-8,24-dien-3beta-ol$5alpha-Cholesta-7,24-dien-3beta-ol$Cholesta-5,7-dien-3beta-ol; 7-Dehydrocholesterol; Provitamin D3$Vitamin D3; Cholecalciferol	-0.0487318
Glycosphingolipid metabolism	vam_1009745	Infant	Infant::vam_1009745	386.285	352	Positive	E215	Phytosphingosine; 4-D-Hydroxysphinganine	0.122019
Squalene and cholesterol biosynthesis	vam_1009752	Infant	Infant::vam_1009752	386.349	427	Positive	E148	Desmosterol; 24-Dehydrocholesterol; Cholesta-5,24-dien-3beta-ol$Cholest-4-en-3-one; Cholestenone; 4-Cholesten-3-one$Zymosterol; delta8,24-Cholestadien-3beta-ol; 5alpha-Cholesta-8,24-dien-3beta-ol$5alpha-Cholesta-7,24-dien-3beta-ol$Cholesta-5,7-dien-3beta-ol; 7-Dehydrocholesterol; Provitamin D3$Vitamin D3; Cholecalciferol	-0.00647057
Vitamin D	vam_1009752	Infant	Infant::vam_1009752	386.349	427	Positive	E148	Desmosterol; 24-Dehydrocholesterol; Cholesta-5,24-dien-3beta-ol$Cholest-4-en-3-one; Cholestenone; 4-Cholesten-3-one$Zymosterol; delta8,24-Cholestadien-3beta-ol; 5alpha-Cholesta-8,24-dien-3beta-ol$5alpha-Cholesta-7,24-dien-3beta-ol$Cholesta-5,7-dien-3beta-ol; 7-Dehydrocholesterol; Provitamin D3$Vitamin D3; Cholecalciferol	-0.00647057
Purine metabolism	vam_1010139	Infant	Infant::vam_1010139	395.019	519	Positive	E177	dIDP; 2'-Deoxyinosine-5'-diphosphate; 2'-Deoxyinosine 5'-diphosphate	-0.00457875
D4&E4-neuroprostanes formation	vam_1010293	Infant	Infant::vam_1010293	398.203	485	Positive	E173	$$$$$$$$$$$$$$$	-0.0010253
Vitamin D3 (cholecalciferol) metabolism	vam_1010357	Infant	Infant::vam_1010357	399.328	377	Positive	E85	7alpha,12alpha-Dihydroxycholest-4-en-3-one$Calcitriol$23S,25-dihydroxyvitamin D3$7alpha,26-Dihydroxy-4-cholesten-3-one$$$7alpha,25-Dihydroxy-4-cholesten-3-one	0.601099
Prostaglandin formation from arachidonate	vam_1010436	Infant	Infant::vam_1010436	401.267	363	Negative	E90	2-Arachidonoylglycerol; 2-Arachidonoyl-sn-glycerol	-0.322065
Squalene and cholesterol biosynthesis	vam_1010492	Infant	Infant::vam_1010492	402.384	425	Negative	E168	Campesterol$Lophenol; 4-Methylcholest-7-en-3-ol; 4alpha-Methyl-5alpha-cholest-7-en-3beta-ol	-0.00236859
Leukotriene metabolism	vam_1010778	Infant	Infant::vam_1010778	408.214	348	Negative	E262	10,11-dihydro-20-trihydroxy-leukotriene B4	-0.0035601
Prostaglandin formation from arachidonate	vam_1010897	Infant	Infant::vam_1010897	411.274	331	Negative	E200	12-hydroperoxyeicosatetraenoate glyceryl ester	-0.00583606
Prostaglandin formation from arachidonate	vam_1010926	Infant	Infant::vam_1010926	412.276	0.35	Negative	E200	12-hydroperoxyeicosatetraenoate glyceryl ester	-0.00569749
Glycosphingolipid metabolism	vam_1011015	Infant	Infant::vam_1011015	414.265	392	Negative	E124	dihydroceramide	-0.00718359
C21-steroid hormone biosynthesis and metabolism	vam_1011675	Infant	Infant::vam_1011675	429.189	317	Negative	E109	Cortisone; 17alpha,21-Dihydroxy-4-pregnene-3,11,20-trione; Kendall's compound E; Reichstein's substance Fa$Aldosterone; 11beta,21-Dihydroxy-3,20-dioxo-4-pregnen-18-al	0.0136718
Squalene and cholesterol biosynthesis	vam_1012699	Infant	Infant::vam_1012699	453.338	417	Negative	E148	Desmosterol; 24-Dehydrocholesterol; Cholesta-5,24-dien-3beta-ol$Cholest-4-en-3-one; Cholestenone; 4-Cholesten-3-one$Zymosterol; delta8,24-Cholestadien-3beta-ol; 5alpha-Cholesta-8,24-dien-3beta-ol$5alpha-Cholesta-7,24-dien-3beta-ol$Cholesta-5,7-dien-3beta-ol; 7-Dehydrocholesterol; Provitamin D3$Vitamin D3; Cholecalciferol	-0.00182892
Vitamin D	vam_1012699	Infant	Infant::vam_1012699	453.338	417	Negative	E148	Desmosterol; 24-Dehydrocholesterol; Cholesta-5,24-dien-3beta-ol$Cholest-4-en-3-one; Cholestenone; 4-Cholesten-3-one$Zymosterol; delta8,24-Cholestadien-3beta-ol; 5alpha-Cholesta-8,24-dien-3beta-ol$5alpha-Cholesta-7,24-dien-3beta-ol$Cholesta-5,7-dien-3beta-ol; 7-Dehydrocholesterol; Provitamin D3$Vitamin D3; Cholecalciferol	-0.00182892
Arachidonic acid metabolism	vam_1014770	Infant	Infant::vam_1014770	497.265	331	Negative	E183	Leukotriene D4; LTD4	-0.00360561
Leukotriene metabolism	vam_1014770	Infant	Infant::vam_1014770	497.265	331	Negative	E183	Leukotriene D4; LTD4	-0.00360561
Arachidonic acid metabolism	vam_1014911	Infant	Infant::vam_1014911	499.264	321	Negative	E183	Leukotriene D4; LTD4	-0.00583508
Leukotriene metabolism	vam_1014911	Infant	Infant::vam_1014911	499.264	321	Negative	E183	Leukotriene D4; LTD4	-0.00583508
Nucleotide Sugar Metabolism	vam_1015238	Infant	Infant::vam_1015238	504.978	525	Negative	E100	dTTP	0.0034555
Nucleotide Sugar Metabolism	vam_1017887	Infant	Infant::vam_1017887	559.031	0.51	Negative	E180	UDP-D-xylose	0.00490942
Glycosphingolipid metabolism	vam_1027182	Infant	Infant::vam_1027182	731.606	485	Negative	E210	Sphingomyelin	-0.270409
Sphingolipid metabolism	vam_1027182	Infant	Infant::vam_1027182	731.606	485	Negative	E210	Sphingomyelin	-0.270409
Glycosphingolipid metabolism	vam_1027242	Infant	Infant::vam_1027242	732.608	485	Negative	E210	Sphingomyelin	-0.172687
Sphingolipid metabolism	vam_1027242	Infant	Infant::vam_1027242	732.608	485	Negative	E210	Sphingomyelin	-0.172687
Glycosphingolipid metabolism	vam_1027295	Infant	Infant::vam_1027295	733.615	488	Negative	E210	Sphingomyelin	-0.0195667
Sphingolipid metabolism	vam_1027295	Infant	Infant::vam_1027295	733.615	488	Negative	E210	Sphingomyelin	-0.0195667
Glycosphingolipid metabolism	vam_1028991	Infant	Infant::vam_1028991	768.154	77	Negative	E167	Flavin adenine dinucleotide oxidized	0.00285254
Phytanic acid peroxisomal oxidation	vam_1030204	Infant	Infant::vam_1030204	796.118	83	Negative	E107	Formyl-CoA	0.00533758
Limonene and pinene degradation	vam_1036252	Infant	Infant::vam_1036252	896.187	521	Negative	E111	trans,cis-deca-2,4-dienoyl-CoA$trans-2-Methyl-5-isopropylhexa-2,5-dienoyl-CoA$cis-2-Methyl-5-isopropylhexa-2,5-dienoyl-CoA	0.00361918
Fatty Acid Metabolism	vam_1039235	Infant	Infant::vam_1039235	956.246	77	Negative	E198	4,8 dimethylnonanoyl-CoA	-0.00495133
Fatty acid oxidation	vam_1039235	Infant	Infant::vam_1039235	956.246	77	Negative	E198	4,8 dimethylnonanoyl-CoA	-0.00495133
Purine metabolism	vam_2000031	Infant	Infant::vam_2000031	75.009	148	Positive	E2	Xanthine	0.0196231
Ascorbate (Vitamin C) and Aldarate Metabolism	vam_2000094	Infant	Infant::vam_2000094	87.009	158	Positive	E194	D-glucurono-6,3-lactone$L-Ascorbate$D-glucurono-6,3-lactone	-0.00954208
Urea cycle/amino group metabolism	vam_2000191	Infant	Infant::vam_2000191	95.025	144	Positive	E1	o-methylhippurate	-0.00270263
TCA cycle	vam_2000289	Infant	Infant::vam_2000289	99.009	0.16	Positive	E5	Methylmalonate; Methylmalonic acid$Succinate	0.383656
Aspartate and asparagine metabolism	vam_2000327	Infant	Infant::vam_2000327	102.056	392	Positive	E7	(S)-2-Aminobutanoate; (S)-2-Aminobutanoic acid; (S)-2-Aminobutyric acid$N,N-Dimethylglycine; Dimethylglycine$4-Aminobutanoate$3-Aminoisobutyric acid; 3-Aminoisobutanoate; 3-Amino-2-methylpropanoate$D-3-Amino-isobutanoate$L-3-Amino-isobutanoate	-0.0130332
Urea cycle/amino group metabolism	vam_2000327	Infant	Infant::vam_2000327	102.056	392	Positive	E7	(S)-2-Aminobutanoate; (S)-2-Aminobutanoic acid; (S)-2-Aminobutyric acid$N,N-Dimethylglycine; Dimethylglycine$4-Aminobutanoate$3-Aminoisobutyric acid; 3-Aminoisobutanoate; 3-Amino-2-methylpropanoate$D-3-Amino-isobutanoate$L-3-Amino-isobutanoate	-0.0130332
Urea cycle/amino group metabolism	vam_2000664	Infant	Infant::vam_2000664	127.051	146	Positive	E105	Peptide 2-(3-carboxy-3-aminopropyl)-L-histidine	-0.0385736
Aspartate and asparagine metabolism	vam_2000803	Infant	Infant::vam_2000803	130.052	163	Positive	E26	L-Glutamate 5-semialdehyde; L-Glutamate gamma-semialdehyde$trans-4-Hydroxy-L-proline$5-Aminolevulinate; 5-Amino-4-oxopentanoate; 5-Amino-4-oxovaleric acid$cis-4-Hydroxy-D-proline$5-Amino-2-oxopentanoic acid; 5-Amino-2-oxopentanoate; 2-Oxo-5-amino-pentanoate; 2-Oxo-5-aminopentanoate; alpha-Keto-delta-aminopentanoate; 2-Oxo-5-aminovalerate	-0.00786026
Urea cycle/amino group metabolism	vam_2000803	Infant	Infant::vam_2000803	130.052	163	Positive	E26	L-Glutamate 5-semialdehyde; L-Glutamate gamma-semialdehyde$trans-4-Hydroxy-L-proline$5-Aminolevulinate; 5-Amino-4-oxopentanoate; 5-Amino-4-oxovaleric acid$cis-4-Hydroxy-D-proline$5-Amino-2-oxopentanoic acid; 5-Amino-2-oxopentanoate; 2-Oxo-5-amino-pentanoate; 2-Oxo-5-aminopentanoate; alpha-Keto-delta-aminopentanoate; 2-Oxo-5-aminovalerate	-0.00786026
Aspartate and asparagine metabolism	vam_2000839	Infant	Infant::vam_2000839	132.03	129	Positive	E39	L-Aspartate$D-Aspartate	-0.00954208
Urea cycle/amino group metabolism	vam_2000839	Infant	Infant::vam_2000839	132.03	129	Positive	E39	L-Aspartate$D-Aspartate	-0.00954208
Ascorbate (Vitamin C) and Aldarate Metabolism	vam_2000920	Infant	Infant::vam_2000920	135.03	148	Positive	E13	$Hypoxanthine	0.732066
Purine metabolism	vam_2000920	Infant	Infant::vam_2000920	135.03	148	Positive	E13	$Hypoxanthine	0.732066
Linoleate metabolism	vam_2000956	Infant	Infant::vam_2000956	137.097	388	Positive	E8	$	-0.00496169
Linoleate metabolism	vam_2001036	Infant	Infant::vam_2001036	139.113	235	Positive	E134	linoleic acid (all cis C18:2) n-6	-0.0054878
Aspartate and asparagine metabolism	vam_2001423	Infant	Infant::vam_2001423	144.067	0.16	Positive	E184	6-Amino-2-oxohexanoate; 2-Oxo-6-aminocaproate$4-Acetamidobutanoate$L-2-Aminoadipate 6-semialdehyde; 2-Aminoadipate 6-semialdehyde	-0.01106
Urea cycle/amino group metabolism	vam_2001423	Infant	Infant::vam_2001423	144.067	0.16	Positive	E184	6-Amino-2-oxohexanoate; 2-Oxo-6-aminocaproate$4-Acetamidobutanoate$L-2-Aminoadipate 6-semialdehyde; 2-Aminoadipate 6-semialdehyde	-0.01106
Aspartate and asparagine metabolism	vam_2001441	Infant	Infant::vam_2001441	145.014	146	Positive	E243	2-Oxoglutarate	-0.00954208
TCA cycle	vam_2001441	Infant	Infant::vam_2001441	145.014	146	Positive	E243	2-Oxoglutarate	-0.00954208
Urea cycle/amino group metabolism	vam_2001441	Infant	Infant::vam_2001441	145.014	146	Positive	E243	2-Oxoglutarate	-0.00954208
Chondroitin sulfate degradation	vam_2001517	Infant	Infant::vam_2001517	149.046	152	Positive	E4	L-Arabinose$D-Ribulose; D-erythro-2-Pentulose; D-Arabinoketose; D-Arabinulose; D-Riboketose$L-Xylulose$D-Xylulose$D-Ribose$D-Xylose	0.171061
Heparan sulfate degradation	vam_2001517	Infant	Infant::vam_2001517	149.046	152	Positive	E4	L-Arabinose$D-Ribulose; D-erythro-2-Pentulose; D-Arabinoketose; D-Arabinulose; D-Riboketose$L-Xylulose$D-Xylulose$D-Ribose$D-Xylose	0.171061
Aspartate and asparagine metabolism	vam_2001545	Infant	Infant::vam_2001545	151.026	165	Positive	E26	L-Glutamate 5-semialdehyde; L-Glutamate gamma-semialdehyde$trans-4-Hydroxy-L-proline$5-Aminolevulinate; 5-Amino-4-oxopentanoate; 5-Amino-4-oxovaleric acid$cis-4-Hydroxy-D-proline$5-Amino-2-oxopentanoic acid; 5-Amino-2-oxopentanoate; 2-Oxo-5-amino-pentanoate; 2-Oxo-5-aminopentanoate; alpha-Keto-delta-aminopentanoate; 2-Oxo-5-aminovalerate	-0.165803
Urea cycle/amino group metabolism	vam_2001545	Infant	Infant::vam_2001545	151.026	165	Positive	E26	L-Glutamate 5-semialdehyde; L-Glutamate gamma-semialdehyde$trans-4-Hydroxy-L-proline$5-Aminolevulinate; 5-Amino-4-oxopentanoate; 5-Amino-4-oxovaleric acid$cis-4-Hydroxy-D-proline$5-Amino-2-oxopentanoic acid; 5-Amino-2-oxopentanoate; 2-Oxo-5-amino-pentanoate; 2-Oxo-5-aminopentanoate; alpha-Keto-delta-aminopentanoate; 2-Oxo-5-aminovalerate	-0.165803
Aspartate and asparagine metabolism	vam_2001747	Infant	Infant::vam_2001747	153.004	152	Positive	E39	L-Aspartate$D-Aspartate	-0.00836469
Urea cycle/amino group metabolism	vam_2001747	Infant	Infant::vam_2001747	153.004	152	Positive	E39	L-Aspartate$D-Aspartate	-0.00836469
Linoleate metabolism	vam_2001760	Infant	Infant::vam_2001760	153.092	388	Positive	E28	NA	-0.014308
Ascorbate (Vitamin C) and Aldarate Metabolism	vam_2001792	Infant	Infant::vam_2001792	154.999	163	Positive	E33	Dehydroascorbate$cis-Aconitate; cis-Aconitic acid	0.0177329
D4&E4-neuroprostanes formation	vam_2001792	Infant	Infant::vam_2001792	154.999	163	Positive	E33	Dehydroascorbate$cis-Aconitate; cis-Aconitic acid	0.0177329
TCA cycle	vam_2001792	Infant	Infant::vam_2001792	154.999	163	Positive	E33	Dehydroascorbate$cis-Aconitate; cis-Aconitic acid	0.0177329
Histidine metabolism	vam_2001799	Infant	Infant::vam_2001799	155.046	167	Positive	E1	4-Imidazolone-5-propanoate	0.0247606
Aspartate and asparagine metabolism	vam_2001922	Infant	Infant::vam_2001922	160.062	148	Positive	E184	6-Amino-2-oxohexanoate; 2-Oxo-6-aminocaproate$4-Acetamidobutanoate$L-2-Aminoadipate 6-semialdehyde; 2-Aminoadipate 6-semialdehyde	-0.0154891
Urea cycle/amino group metabolism	vam_2001922	Infant	Infant::vam_2001922	160.062	148	Positive	E184	6-Amino-2-oxohexanoate; 2-Oxo-6-aminocaproate$4-Acetamidobutanoate$L-2-Aminoadipate 6-semialdehyde; 2-Aminoadipate 6-semialdehyde	-0.0154891
Aspartate and asparagine metabolism	vam_2001943	Infant	Infant::vam_2001943	161.008	0.15	Positive	E243	2-Oxoglutarate	-0.515557
TCA cycle	vam_2001943	Infant	Infant::vam_2001943	161.008	0.15	Positive	E243	2-Oxoglutarate	-0.515557
Urea cycle/amino group metabolism	vam_2001943	Infant	Infant::vam_2001943	161.008	0.15	Positive	E243	2-Oxoglutarate	-0.515557
N-Glycan Degradation	vam_2002009	Infant	Infant::vam_2002009	163.061	175	Positive	E42	6-Deoxy-L-galactose; L-Fucose	0.277918
Urea cycle/amino group metabolism	vam_2002047	Infant	Infant::vam_2002047	164.072	206	Positive	E16	L-Normetanephrine$L-Adrenaline; (R)-(-)-Adrenaline; (R)-(-)-Epinephrine; (R)-(-)-Epirenamine; (R)-(-)-Adnephrine; 4-[(1R)-1-Hydroxy-2-(methylamino)ethyl]-1,2-benzenediol	-0.450848
Purine metabolism	vam_2002071	Infant	Infant::vam_2002071	165.018	608	Positive	E5	2'-Deoxyinosine 5'-phosphate; dIMP	-0.0023285
Tyrosine metabolism	vam_2002071	Infant	Infant::vam_2002071	165.018	608	Positive	E5	2'-Deoxyinosine 5'-phosphate; dIMP	-0.0023285
Aspartate and asparagine metabolism	vam_2002074	Infant	Infant::vam_2002074	165.041	146	Positive	E184	6-Amino-2-oxohexanoate; 2-Oxo-6-aminocaproate$4-Acetamidobutanoate$L-2-Aminoadipate 6-semialdehyde; 2-Aminoadipate 6-semialdehyde	-0.240402
Urea cycle/amino group metabolism	vam_2002074	Infant	Infant::vam_2002074	165.041	146	Positive	E184	6-Amino-2-oxohexanoate; 2-Oxo-6-aminocaproate$4-Acetamidobutanoate$L-2-Aminoadipate 6-semialdehyde; 2-Aminoadipate 6-semialdehyde	-0.240402
Purine metabolism	vam_2002092	Infant	Infant::vam_2002092	166.014	225	Positive	E28	$Quinolinate	0.0094279
Ascorbate (Vitamin C) and Aldarate Metabolism	vam_2002331	Infant	Infant::vam_2002331	173.01	96	Positive	E172	Citrate$$Isocitrate	-0.0198049
TCA cycle	vam_2002331	Infant	Infant::vam_2002331	173.01	96	Positive	E172	Citrate$$Isocitrate	-0.0198049
Ascorbate (Vitamin C) and Aldarate Metabolism	vam_2002332	Infant	Infant::vam_2002332	173.009	158	Positive	E31	Citrate$$Isocitrate	0.760914
D4&E4-neuroprostanes formation	vam_2002332	Infant	Infant::vam_2002332	173.009	158	Positive	E31	Citrate$$Isocitrate	0.760914
TCA cycle	vam_2002332	Infant	Infant::vam_2002332	173.009	158	Positive	E31	Citrate$$Isocitrate	0.760914
Aspartate and asparagine metabolism	vam_2002342	Infant	Infant::vam_2002342	173.056	138	Positive	E39	L-Aspartate$D-Aspartate	-0.134025
Urea cycle/amino group metabolism	vam_2002342	Infant	Infant::vam_2002342	173.056	138	Positive	E39	L-Aspartate$D-Aspartate	-0.134025
Alanine and Aspartate Metabolism	vam_2002375	Infant	Infant::vam_2002375	174.04	171	Positive	E8	N-Formyl-L-glutamate$N-Acetyl-L-aspartate	-0.0108598
Vitamin B9 (folate) metabolism	vam_2002375	Infant	Infant::vam_2002375	174.04	171	Positive	E8	N-Formyl-L-glutamate$N-Acetyl-L-aspartate	-0.0108598
Ascorbate (Vitamin C) and Aldarate Metabolism	vam_2002472	Infant	Infant::vam_2002472	177.039	227	Positive	E210	D-Gluconate$L-Gulonate	-0.0205381
Aspartate and asparagine metabolism	vam_2003151	Infant	Infant::vam_2003151	190.072	144	Positive	E184	6-Amino-2-oxohexanoate; 2-Oxo-6-aminocaproate$4-Acetamidobutanoate$L-2-Aminoadipate 6-semialdehyde; 2-Aminoadipate 6-semialdehyde	-0.00806708
Urea cycle/amino group metabolism	vam_2003151	Infant	Infant::vam_2003151	190.072	144	Positive	E184	6-Amino-2-oxohexanoate; 2-Oxo-6-aminocaproate$4-Acetamidobutanoate$L-2-Aminoadipate 6-semialdehyde; 2-Aminoadipate 6-semialdehyde	-0.00806708
Ascorbate (Vitamin C) and Aldarate Metabolism	vam_2003167	Infant	Infant::vam_2003167	191.02	0.16	Positive	E174	Citrate$$Isocitrate	-0.851232
Aspartate and asparagine metabolism	vam_2003167	Infant	Infant::vam_2003167	191.02	0.16	Positive	E174	Citrate$$Isocitrate	-0.851232
TCA cycle	vam_2003167	Infant	Infant::vam_2003167	191.02	0.16	Positive	E174	Citrate$$Isocitrate	-0.851232
Urea cycle/amino group metabolism	vam_2003167	Infant	Infant::vam_2003167	191.02	0.16	Positive	E174	Citrate$$Isocitrate	-0.851232
Ascorbate (Vitamin C) and Aldarate Metabolism	vam_2003187	Infant	Infant::vam_2003187	192.023	156	Positive	E174	Citrate$$Isocitrate	-0.0194529
TCA cycle	vam_2003187	Infant	Infant::vam_2003187	192.023	156	Positive	E174	Citrate$$Isocitrate	-0.0194529
Ascorbate (Vitamin C) and Aldarate Metabolism	vam_2003274	Infant	Infant::vam_2003274	195.051	146	Positive	E13	$Hypoxanthine	0.0615066
Purine metabolism	vam_2003274	Infant	Infant::vam_2003274	195.051	146	Positive	E13	$Hypoxanthine	0.0615066
Linoleate metabolism	vam_2003405	Infant	Infant::vam_2003405	199.098	398	Positive	E28	NA	-0.310169
Ascorbate (Vitamin C) and Aldarate Metabolism	vam_2003705	Infant	Infant::vam_2003705	208.986	0.16	Positive	E33	Dehydroascorbate$cis-Aconitate; cis-Aconitic acid	0.0120269
D4&E4-neuroprostanes formation	vam_2003705	Infant	Infant::vam_2003705	208.986	0.16	Positive	E33	Dehydroascorbate$cis-Aconitate; cis-Aconitic acid	0.0120269
TCA cycle	vam_2003705	Infant	Infant::vam_2003705	208.986	0.16	Positive	E33	Dehydroascorbate$cis-Aconitate; cis-Aconitic acid	0.0120269
N-Glycan Degradation	vam_2004123	Infant	Infant::vam_2004123	223.083	175	Positive	E42	6-Deoxy-L-galactose; L-Fucose	0.0164376
Ascorbate (Vitamin C) and Aldarate Metabolism	vam_2004233	Infant	Infant::vam_2004233	226.997	163	Positive	E31	Citrate$$Isocitrate	0.0675371
TCA cycle	vam_2004233	Infant	Infant::vam_2004233	226.997	163	Positive	E31	Citrate$$Isocitrate	0.0675371
Urea cycle/amino group metabolism	vam_2004293	Infant	Infant::vam_2004293	228.086	204	Positive	E83	L-Normetanephrine$L-Adrenaline; (R)-(-)-Adrenaline; (R)-(-)-Epinephrine; (R)-(-)-Epirenamine; (R)-(-)-Adnephrine; 4-[(1R)-1-Hydroxy-2-(methylamino)ethyl]-1,2-benzenediol	-0.00665598
Ascorbate (Vitamin C) and Aldarate Metabolism	vam_2004310	Infant	Infant::vam_2004310	228.994	163	Positive	E31	Citrate$$Isocitrate	0.0227838
TCA cycle	vam_2004310	Infant	Infant::vam_2004310	228.994	163	Positive	E31	Citrate$$Isocitrate	0.0227838
Aspartate and asparagine metabolism	vam_2004357	Infant	Infant::vam_2004357	230.069	225	Positive	E156	N-Succinyl-L-glutamate 5-semialdehyde; (2S)-2-(3-Carboxypropanoylamino)-5-oxopentanoic acid	-0.0288105
Ascorbate (Vitamin C) and Aldarate Metabolism	vam_2004454	Infant	Infant::vam_2004454	233.031	65	Positive	E177	Dehydroascorbate$cis-Aconitate; cis-Aconitic acid	-0.00954208
TCA cycle	vam_2004454	Infant	Infant::vam_2004454	233.031	65	Positive	E177	Dehydroascorbate$cis-Aconitate; cis-Aconitic acid	-0.00954208
Urea cycle/amino group metabolism	vam_2004738	Infant	Infant::vam_2004738	242.101	204	Positive	E16	L-Normetanephrine$L-Adrenaline; (R)-(-)-Adrenaline; (R)-(-)-Epinephrine; (R)-(-)-Epirenamine; (R)-(-)-Adnephrine; 4-[(1R)-1-Hydroxy-2-(methylamino)ethyl]-1,2-benzenediol	-0.0171755
Drug metabolism - other enzymes	vam_2005417	Infant	Infant::vam_2005417	258.102	269	Positive	E36	NPC	-0.00652597
Urea cycle/amino group metabolism	vam_2005417	Infant	Infant::vam_2005417	258.102	269	Positive	E36	NPC	-0.00652597
Linoleate metabolism	vam_2005999	Infant	Infant::vam_2005999	277.217	435	Positive	E28	13(S)-HODE; (13S)-Hydroxyoctadecadienoic acid; (9Z, 11E)-(13S)-13-Hydroxyoctadeca-9,11-dienoic acid$12(13)-EpOME; (12R,13S)-(9Z)-12,13-Epoxyoctadecenoic acid$9(10)-EpOME; (9R,10S)-(12Z)-9,10-Epoxyoctadecenoic acid	0.36507
Omega-3 fatty acid metabolism	vam_2005999	Infant	Infant::vam_2005999	277.217	435	Positive	E28	13(S)-HODE; (13S)-Hydroxyoctadecadienoic acid; (9Z, 11E)-(13S)-13-Hydroxyoctadeca-9,11-dienoic acid$12(13)-EpOME; (12R,13S)-(9Z)-12,13-Epoxyoctadecenoic acid$9(10)-EpOME; (9R,10S)-(12Z)-9,10-Epoxyoctadecenoic acid	0.36507
Linoleate metabolism	vam_2006095	Infant	Infant::vam_2006095	278.22	438	Positive	E30	(6Z,9Z,12Z)-Octadecatrienoic acid; 6,9,12-Octadecatrienoic acid; gamma-Linolenic acid; Gamolenic acid$(9Z,12Z,15Z)-Octadecatrienoic acid; alpha-Linolenic acid; 9,12,15-Octadecatrienoic acid; Linolenate; alpha-Linolenate	0.0126691
Omega-3 fatty acid metabolism	vam_2006095	Infant	Infant::vam_2006095	278.22	438	Positive	E30	(6Z,9Z,12Z)-Octadecatrienoic acid; 6,9,12-Octadecatrienoic acid; gamma-Linolenic acid; Gamolenic acid$(9Z,12Z,15Z)-Octadecatrienoic acid; alpha-Linolenic acid; 9,12,15-Octadecatrienoic acid; Linolenate; alpha-Linolenate	0.0126691
C21-steroid hormone biosynthesis and metabolism	vam_2006620	Infant	Infant::vam_2006620	287.165	417	Positive	E106	2-Hydroxyestradiol-17beta; 2-OH-Estradiol$4,17 dihydroxy estradiol$Estriol; 1,3,5(10)-Estratriene-3,16-alpha,17beta-triol$4-hydroxy-17beta-estradiol	-0.00464017
C21-steroid hormone biosynthesis and metabolism	vam_2006688	Infant	Infant::vam_2006688	289.218	431	Positive	E115	5alpha-Dihydrotestosterone$5beta-Dihydrotestosterone$Androsterone$3alpha-Hydroxy-5beta-androstan-17-one; Etiocholan-3alpha-ol-17-one; 3alpha-Hydroxyetiocholan-17-one$Androst-5-ene-3beta,17beta-diol; 3beta,17beta-Dihydroxyandrost-5-ene; 3beta,17beta-Dihydroxy-5-androstene; Androstenediol	-0.00341639
Urea cycle/amino group metabolism	vam_2006737	Infant	Infant::vam_2006737	291.084	0.16	Positive	E105	Peptide 2-(3-carboxy-3-aminopropyl)-L-histidine	-0.353076
Electron transport chain	vam_2007161	Infant	Infant::vam_2007161	299.163	419	Positive	E143	Ubiquinone	-0.0118595
Fatty acid oxidation	vam_2007161	Infant	Infant::vam_2007161	299.163	419	Positive	E143	Ubiquinone	-0.0118595
TCA cycle	vam_2007161	Infant	Infant::vam_2007161	299.163	419	Positive	E143	Ubiquinone	-0.0118595
Linoleate metabolism	vam_2007673	Infant	Infant::vam_2007673	311.223	406	Positive	E8	(9Z,11E)-(13S)-13-Hydroperoxyoctadeca-9,11-dienoic acid; (9Z,11E)-(13S)-13-Hydroperoxyoctadeca-9,11-dienoate; 13(S)-HPODE; 13S-Hydroperoxy-9Z,11E-octadecadienoic acid$9(S)-HPODE; 9(S)-HPOD; (10E,12Z)-(9S)-9-Hydroperoxyoctadeca-10,12-dienoic acid	0.000844097
Linoleate metabolism	vam_2007775	Infant	Infant::vam_2007775	312.233	394	Positive	E130	9,10-hydroxyoctadec-12(Z)-enoate$12,13-hydroxyoctadec-9(Z)-enoate	-0.0127213
Urea cycle/amino group metabolism	vam_2008021	Infant	Infant::vam_2008021	315.131	146	Positive	E105	Peptide 2-(3-carboxy-3-aminopropyl)-L-histidine	-0.00676954
C21-steroid hormone biosynthesis and metabolism	vam_2008883	Infant	Infant::vam_2008883	331.1	206	Positive	E137	Estrone 3-sulfate	-0.103282
Electron transport chain	vam_2008953	Infant	Infant::vam_2008953	333.173	423	Positive	E143	Ubiquinone	-0.00614981
Fatty acid oxidation	vam_2008953	Infant	Infant::vam_2008953	333.173	423	Positive	E143	Ubiquinone	-0.00614981
TCA cycle	vam_2008953	Infant	Infant::vam_2008953	333.173	423	Positive	E143	Ubiquinone	-0.00614981
Linoleate metabolism	vam_2008955	Infant	Infant::vam_2008955	333.207	406	Positive	E130	9,10-hydroxyoctadec-12(Z)-enoate$12,13-hydroxyoctadec-9(Z)-enoate	-0.377693
Linoleate metabolism	vam_2009649	Infant	Infant::vam_2009649	350.205	404	Positive	E130	9,10-hydroxyoctadec-12(Z)-enoate$12,13-hydroxyoctadec-9(Z)-enoate	-0.00749361
Prostaglandin formation from arachidonate	vam_2009691	Infant	Infant::vam_2009691	351.217	0.41	Positive	E47	Prostaglandin D2$w-hydroxyl leukotriene B4$Lipoxin B4; LXB4; 5S,14R,15S-Trihydroxy-6E,8Z,10E,12E-eicosatetraenoic acid; (6E,8Z,10E,12E)-(5S,14R,15S)-Trihydroxyicosa-6,8,10,12-tetraenoic acid$Lipoxin A4; LXA4; 5S,6R,15S-Trihydroxy-7E,9E,11Z,13E-eicosatetraenoic acid; (7E,9E,11Z,13E)-(5S,6R,15S)-5,6,15-Trihydroxyicosa-7,9,11,13-tetraenoic acid$Prostaglandin E2$(13E)-11alpha-Hydroxy-9,15-dioxoprost-…	0.144836
Drug metabolism - other enzymes	vam_2010447	Infant	Infant::vam_2010447	374.034	606	Positive	E66	6-Methylthioguanosine monophosphate	-0.0192698
C21-steroid hormone biosynthesis and metabolism	vam_2010903	Infant	Infant::vam_2010903	387.081	202	Positive	E137	Estrone 3-sulfate	-0.0106739
Sialic acid metabolism	vam_2011489	Infant	Infant::vam_2011489	403.068	138	Negative	E85	Lactose 6-phosphate	0.00732741
Prostaglandin formation from arachidonate	vam_2011645	Infant	Infant::vam_2011645	407.243	0.45	Negative	E54	NA	0.157879
Sialic acid metabolism	vam_2012213	Infant	Infant::vam_2012213	422.077	142	Negative	E85	Lactose 6-phosphate	0.00771187
Glycerophospholipid metabolism	vam_2012407	Infant	Infant::vam_2012407	427.045	379	Negative	E14	CDPethanolamine	-0.0187693
Sialic acid metabolism	vam_2013071	Infant	Infant::vam_2013071	442.053	0.14	Negative	E85	Lactose 6-phosphate	0.00184764
Glycosphingolipid metabolism	vam_2016832	Infant	Infant::vam_2016832	522.273	465	Negative	E14	Psychosine sulfate	0.00698783
Blood Group Biosynthesis	vam_2018788	Infant	Infant::vam_2018788	565.048	146	Negative	E50	UDPglucose$UDPgalactose	0.00461859
Glycosphingolipid biosynthesis - ganglioseries	vam_2018788	Infant	Infant::vam_2018788	565.048	146	Negative	E50	UDPglucose$UDPgalactose	0.00461859
Glycosphingolipid biosynthesis - globoseries	vam_2018788	Infant	Infant::vam_2018788	565.048	146	Negative	E50	UDPglucose$UDPgalactose	0.00461859
Glycosphingolipid biosynthesis - lactoseries	vam_2018788	Infant	Infant::vam_2018788	565.048	146	Negative	E50	UDPglucose$UDPgalactose	0.00461859
Glycosphingolipid biosynthesis - neolactoseries	vam_2018788	Infant	Infant::vam_2018788	565.048	146	Negative	E50	UDPglucose$UDPgalactose	0.00461859
Glycosphingolipid metabolism	vam_2018788	Infant	Infant::vam_2018788	565.048	146	Negative	E50	UDPglucose$UDPgalactose	0.00461859
Keratan sulfate biosynthesis	vam_2018788	Infant	Infant::vam_2018788	565.048	146	Negative	E50	UDPglucose$UDPgalactose	0.00461859
N-Glycan biosynthesis	vam_2018788	Infant	Infant::vam_2018788	565.048	146	Negative	E50	UDPglucose$UDPgalactose	0.00461859
O-Glycan biosynthesis	vam_2018788	Infant	Infant::vam_2018788	565.048	146	Negative	E50	UDPglucose$UDPgalactose	0.00461859
Proteoglycan biosynthesis	vam_2018788	Infant	Infant::vam_2018788	565.048	146	Negative	E50	UDPglucose$UDPgalactose	0.00461859
Starch and Sucrose Metabolism	vam_2018788	Infant	Infant::vam_2018788	565.048	146	Negative	E50	UDPglucose$UDPgalactose	0.00461859
Blood Group Biosynthesis	vam_2020754	Infant	Infant::vam_2020754	606.076	142	Negative	E50	UDPglucose$UDPgalactose	0.00187152
Glycosphingolipid biosynthesis - ganglioseries	vam_2020754	Infant	Infant::vam_2020754	606.076	142	Negative	E50	UDPglucose$UDPgalactose	0.00187152
Glycosphingolipid biosynthesis - globoseries	vam_2020754	Infant	Infant::vam_2020754	606.076	142	Negative	E50	UDPglucose$UDPgalactose	0.00187152
Glycosphingolipid biosynthesis - lactoseries	vam_2020754	Infant	Infant::vam_2020754	606.076	142	Negative	E50	UDPglucose$UDPgalactose	0.00187152
Glycosphingolipid biosynthesis - neolactoseries	vam_2020754	Infant	Infant::vam_2020754	606.076	142	Negative	E50	UDPglucose$UDPgalactose	0.00187152
Glycosphingolipid metabolism	vam_2020754	Infant	Infant::vam_2020754	606.076	142	Negative	E50	UDPglucose$UDPgalactose	0.00187152
Hyaluronan Metabolism	vam_2020754	Infant	Infant::vam_2020754	606.076	142	Negative	E50	UDPglucose$UDPgalactose	0.00187152
Keratan sulfate biosynthesis	vam_2020754	Infant	Infant::vam_2020754	606.076	142	Negative	E50	UDPglucose$UDPgalactose	0.00187152
N-Glycan biosynthesis	vam_2020754	Infant	Infant::vam_2020754	606.076	142	Negative	E50	UDPglucose$UDPgalactose	0.00187152
O-Glycan biosynthesis	vam_2020754	Infant	Infant::vam_2020754	606.076	142	Negative	E50	UDPglucose$UDPgalactose	0.00187152
Proteoglycan biosynthesis	vam_2020754	Infant	Infant::vam_2020754	606.076	142	Negative	E50	UDPglucose$UDPgalactose	0.00187152
Starch and Sucrose Metabolism	vam_2020754	Infant	Infant::vam_2020754	606.076	142	Negative	E50	UDPglucose$UDPgalactose	0.00187152
Fatty acid oxidation	vam_2033784	Infant	Infant::vam_2033784	845.675	648	Negative	E54	Ubiquinol-10	0.346054
N-Glycan Degradation	vam_2039395	Infant	Infant::vam_2039395	1007.83	652	Negative	E98	de-Fuc, reducing GlcNAc removed form of PA6 (w/o peptide linkage)	0.00521293
Carnitine shuttle	vam_2039850	Infant	Infant::vam_2039850	1032.31	667	Negative	E20	trans,cis,cis-2,11,14-eicosatrienoyl-CoA$dihomo-gamma-linolenyl coenzyme A$timnodonyl coenzyme A	-0.007601
De novo fatty acid biosynthesis	vam_2039850	Infant	Infant::vam_2039850	1032.31	667	Negative	E20	trans,cis,cis-2,11,14-eicosatrienoyl-CoA$dihomo-gamma-linolenyl coenzyme A$timnodonyl coenzyme A	-0.007601
Fatty acid activation	vam_2039850	Infant	Infant::vam_2039850	1032.31	667	Negative	E20	trans,cis,cis-2,11,14-eicosatrienoyl-CoA$dihomo-gamma-linolenyl coenzyme A$timnodonyl coenzyme A	-0.007601
Fatty acid oxidation	vam_2039850	Infant	Infant::vam_2039850	1032.31	667	Negative	E20	trans,cis,cis-2,11,14-eicosatrienoyl-CoA$dihomo-gamma-linolenyl coenzyme A$timnodonyl coenzyme A	-0.007601
Omega-6 fatty acid metabolism	vam_2039850	Infant	Infant::vam_2039850	1032.31	667	Negative	E20	trans,cis,cis-2,11,14-eicosatrienoyl-CoA$dihomo-gamma-linolenyl coenzyme A$timnodonyl coenzyme A	-0.007601

## Sheet: proteome_pathways
ID	Description	GeneRatio	BgRatio	RichFactor	FoldEnrichment	zScore	pvalue	p.adjust	qvalue	geneID	Count	direction	source	category	subcategory	signed_ES	qval	dataset
GO:0030195	negative regulation of blood coagulation	4/33	52/18860	0.0769231	43.9627	12.9882	1.98147e-06	0.000652259	0.000488476	350/5624/1361/5345	4	Up	GO			0.0769231	0.000488476	depleted_tri2
hsa04610	Complement and coagulation cascades	5/21	88/9370	0.0568182	25.3517	10.8774	1.17772e-06	6.94858e-05	6.07458e-05	5648/5624/1361/5345/10747	5	Up	KEGG	Organismal Systems	Immune system	0.0568182	6.07458e-05	depleted_tri2
hsa04979	Cholesterol metabolism	3/21	52/9370	0.0576923	25.7418	8.479	0.000199817	0.0058946	0.00515317	5360/4018/350	3	Up	KEGG	Organismal Systems	Digestive system	0.0576923	0.00515317	depleted_tri2
R-HSA-114608	Platelet degranulation	6/23	104/10173	0.0576923	25.5176	11.9629	8.65484e-08	7.16708e-06	5.25083e-06	3671/5267/3699/197/350/5345	6	Up	Reactome			0.0576923	5.25083e-06	depleted_tri2
R-HSA-76005	Response to elevated platelet cytosolic Ca2+	6/23	109/10173	0.0550459	24.347	11.6652	1.14673e-07	7.16708e-06	5.25083e-06	3671/5267/3699/197/350/5345	6	Up	Reactome			0.0550459	5.25083e-06	depleted_tri2
hsa05143	African trypanosomiasis	3/31	37/9370	0.0810811	24.5074	8.25415	0.000236111	0.0213944	0.0180659	3383/7412/8542	3	Up	KEGG	Human Diseases	Infectious disease: parasitic	0.0810811	0.0180659	depleted_tri3
hsa05144	Malaria	3/31	50/9370	0.06	18.1355	6.99924	0.000578515	0.0213944	0.0180659	3383/7412/3683	3	Up	KEGG	Human Diseases	Infectious disease: parasitic	0.06	0.0180659	depleted_tri3
hsa00270	Cysteine and methionine metabolism	3/31	54/9370	0.0555556	16.7921	6.70501	0.000725594	0.0213944	0.0180659	4190/2937/3945	3	Up	KEGG	Metabolism	Amino acid metabolism	0.0555556	0.0180659	depleted_tri3
hsa00480	Glutathione metabolism	3/31	59/9370	0.0508475	15.3691	6.37872	0.000940415	0.0213944	0.0180659	2878/290/2937	3	Up	KEGG	Metabolism	Metabolism of other amino acids	0.0508475	0.0180659	depleted_tri3
R-HSA-9696270	RND2 GTPase cycle	3/47	35/10173	0.0857143	18.5526	7.0865	0.000545368	0.0223601	0.0196619	23129/2802/7037	3	Up	Reactome			0.0857143	0.0196619	depleted_tri3
GO:0002544	chronic inflammatory response	3/35	21/18860	0.142857	76.9796	15.0212	7.61035e-06	0.00664383	0.00513498	7412/6280/8876	3	Up	GO			0.142857	0.00513498	depleted_pn56
GO:0042157	lipoprotein metabolic process	6/30	85/18860	0.0705882	44.3765	15.9981	3.81411e-09	3.68443e-06	2.68995e-06	55937/341/344/347/1509/8542	6	Down	GO			-0.0705882	2.68995e-06	depleted_pn56
GO:0160257	complement activation, GZMK pathway	3/30	12/18860	0.25	157.167	21.5994	7.91307e-07	0.0001274	9.30132e-05	732/731/733	3	Down	GO			-0.25	9.30132e-05	depleted_pn56
hsa04979	Cholesterol metabolism	3/20	52/9370	0.0576923	27.0288	8.70464	0.000171944	0.00338157	0.00265458	341/344/5360	3	Down	KEGG	Organismal Systems	Digestive system	-0.0576923	0.00265458	depleted_pn56
R-HSA-9029569	NR1H3 & NR1H2 regulate gene expression linked to cholesterol transport and efflux	4/24	29/10173	0.137931	58.4655	15.0695	5.4403e-07	8.65008e-05	6.01297e-05	341/344/347/5360	4	Down	Reactome			-0.137931	6.01297e-05	depleted_pn56
R-HSA-9024446	NR1H2 and NR1H3-mediated signaling	4/24	38/10173	0.105263	44.6184	13.0993	1.66697e-06	0.000132524	9.21221e-05	341/344/347/5360	4	Down	Reactome			-0.105263	9.21221e-05	depleted_pn56
R-HSA-977606	Regulation of Complement cascade	3/24	42/10173	0.0714286	30.2768	9.24526	0.000124694	0.00660879	0.004594	732/731/733	3	Down	Reactome			-0.0714286	0.004594	depleted_pn56
R-HSA-166658	Complement cascade	3/24	48/10173	0.0625	26.4922	8.6085	0.00018613	0.00739866	0.00514306	732/731/733	3	Down	Reactome			-0.0625	0.00514306	depleted_pn56
GO:0019433	triglyceride catabolic process	3/14	32/18860	0.09375	126.295	19.3339	1.59465e-06	0.000310623	0.000156559	344/345/338	3	Down	GO			-0.09375	0.000156559	naive_tri3
hsa04979	Cholesterol metabolism	3/9	52/9370	0.0576923	60.0641	13.2425	1.32283e-05	0.000436534	0.000362038	344/345/338	3	Down	KEGG	Organismal Systems	Digestive system	-0.0576923	0.000362038	naive_tri3
R-HSA-8963898	Plasma lipoprotein assembly	4/11	16/10173	0.25	231.205	30.318	1.33778e-09	1.0836e-07	4.50621e-08	344/346/345/338	4	Down	Reactome			-0.25	4.50621e-08	naive_tri3
R-HSA-174824	Plasma lipoprotein assembly, remodeling, and clearance	4/11	62/10173	0.0645161	59.6657	15.2438	3.99761e-07	1.61903e-05	6.73281e-06	344/346/345/338	4	Down	Reactome			-0.0645161	6.73281e-06	naive_tri3
R-HSA-5686938	Regulation of TLR by endogenous ligand	3/11	19/10173	0.157895	146.024	20.8165	9.02896e-07	2.43782e-05	1.01378e-05	6279/929/338	3	Down	Reactome			-0.157895	1.01378e-05	naive_tri3
R-HSA-8963899	Plasma lipoprotein remodeling	3/11	31/10173	0.0967742	89.4985	16.2355	4.15878e-06	8.42153e-05	3.50213e-05	344/345/338	3	Down	Reactome			-0.0967742	3.50213e-05	naive_tri3
R-HSA-975634	Retinoid metabolism and transport	3/11	38/10173	0.0789474	73.012	14.6317	7.77278e-06	0.000125919	5.2364e-05	344/345/338	3	Down	Reactome			-0.0789474	5.2364e-05	naive_tri3
R-HSA-6806667	Metabolism of fat-soluble vitamins	3/11	42/10173	0.0714286	66.0584	13.8999	1.05525e-05	0.000142459	5.92421e-05	344/345/338	3	Down	Reactome			-0.0714286	5.92421e-05	naive_tri3
GO:0006956	complement activation	6/31	65/18860	0.0923077	56.1588	18.0749	9.10516e-10	7.66654e-07	6.08608e-07	712/3426/714/713/2/727	6	Up	GO			0.0923077	6.08608e-07	naive_pn12
hsa04610	Complement and coagulation cascades	8/20	88/9370	0.0909091	42.5909	18.129	5.02907e-12	6.78924e-10	5.7702e-10	712/3426/714/713/2/5265/727/2160	8	Up	KEGG	Organismal Systems	Immune system	0.0909091	5.7702e-10	naive_pn12
hsa05150	Staphylococcus aureus infection	5/20	99/9370	0.0505051	23.6616	10.4834	1.62621e-06	0.000109769	9.32931e-05	712/3426/714/713/727	5	Up	KEGG	Human Diseases	Infectious disease: bacterial	0.0505051	9.32931e-05	naive_pn12
hsa05133	Pertussis	4/20	78/9370	0.0512821	24.0256	9.44409	1.94568e-05	0.000656669	0.000558104	712/714/713/727	4	Up	KEGG	Human Diseases	Infectious disease: bacterial	0.0512821	0.000558104	naive_pn12
R-HSA-114608	Platelet degranulation	7/19	104/10173	0.0673077	36.038	15.5354	4.33563e-10	2.75264e-08	2.1015e-08	6414/5267/3700/3273/2/3481/5265	7	Up	Reactome			0.0673077	2.1015e-08	naive_pn12
R-HSA-76005	Response to elevated platelet cytosolic Ca2+	7/19	109/10173	0.0642202	34.3848	15.1579	6.04977e-10	2.75264e-08	2.1015e-08	6414/5267/3700/3273/2/3481/5265	7	Up	Reactome			0.0642202	2.1015e-08	naive_pn12
R-HSA-977606	Regulation of Complement cascade	4/19	42/10173	0.0952381	50.9925	14.0432	9.30044e-07	2.11585e-05	1.61534e-05	712/714/713/727	4	Up	Reactome			0.0952381	1.61534e-05	naive_pn12
R-HSA-166658	Complement cascade	4/19	48/10173	0.0833333	44.6184	13.1025	1.60537e-06	2.92177e-05	2.23062e-05	712/714/713/727	4	Up	Reactome			0.0833333	2.23062e-05	naive_pn12
R-HSA-166663	Initial triggering of complement	3/19	17/10173	0.176471	94.4861	16.6867	3.69476e-06	5.60372e-05	4.27815e-05	712/714/713	3	Up	Reactome			0.176471	4.27815e-05	naive_pn12
GO:0006956	complement activation	6/24	65/18860	0.0923077	72.5385	20.6227	1.69605e-10	7.34391e-08	4.49901e-08	731/3426/10877/729/720/715	6	Down	GO			-0.0923077	4.49901e-08	naive_pn56
GO:0160257	complement activation, GZMK pathway	3/24	12/18860	0.25	196.458	24.1759	3.95333e-07	4.27948e-05	2.62168e-05	731/729/720	3	Down	GO			-0.25	2.62168e-05	naive_pn56
hsa04610	Complement and coagulation cascades	9/16	88/9370	0.102273	59.8935	22.956	4.05438e-15	1.45958e-13	1.1523e-13	2161/731/3426/10877/729/720/5627/2153/715	9	Down	KEGG	Organismal Systems	Immune system	-0.102273	1.1523e-13	naive_pn56
R-HSA-977606	Regulation of Complement cascade	7/22	42/10173	0.166667	77.0682	22.9965	1.96959e-12	1.4181e-10	7.46371e-11	731/729/1370/1369/720/5627/715	7	Down	Reactome			-0.166667	7.46371e-11	naive_pn56
R-HSA-166658	Complement cascade	7/22	48/10173	0.145833	67.4347	21.4772	5.33378e-12	1.92016e-10	1.01061e-10	731/729/1370/1369/720/5627/715	7	Down	Reactome			-0.145833	1.01061e-10	naive_pn56
R-HSA-8963898	Plasma lipoprotein assembly	3/22	16/10173	0.1875	86.7017	15.9708	4.82753e-06	0.000115861	6.09794e-05	344/346/341	3	Down	Reactome			-0.1875	6.09794e-05	naive_pn56
R-HSA-9029569	NR1H3 & NR1H2 regulate gene expression linked to cholesterol transport and efflux	3/22	29/10173	0.103448	47.8354	11.7579	3.09308e-05	0.000556755	0.000293029	344/346/341	3	Down	Reactome			-0.103448	0.000293029	naive_pn56
R-HSA-140877	Formation of Fibrin Clot (Clotting Cascade)	3/22	33/10173	0.0909091	42.0372	10.992	4.59264e-05	0.000661341	0.000348074	2161/5627/2153	3	Down	Reactome			-0.0909091	0.000348074	naive_pn56
R-HSA-9024446	NR1H2 and NR1H3-mediated signaling	3/22	38/10173	0.0789474	36.506	10.208	7.0515e-05	0.000846181	0.000445358	344/346/341	3	Down	Reactome			-0.0789474	0.000445358	naive_pn56
R-HSA-390450	Folding of actin by CCT/TriC	6/130	10/10173	0.6	46.9523	16.5402	7.81161e-10	1.63002e-07	1.02784e-07	10693/10694/22948/10575/10574/10576	6	Down	Reactome			-0.6	1.02784e-07	milk_pn12
GO:0032212	positive regulation of telomere maintenance via telomerase	7/159	23/18860	0.304348	36.1006	15.531	5.80215e-10	1.5161e-06	1.22456e-06	10728/10694/22948/10575/3320/10574/10576	7	Down	GO			-0.304348	1.22456e-06	milk_pn12
R-HSA-389960	Formation of tubulin folding intermediates by CCT/TriC	6/130	26/10173	0.230769	18.0586	9.90841	7.24061e-07	5.66577e-05	3.57267e-05	10693/10694/22948/10575/10574/10576	6	Down	Reactome			-0.230769	3.57267e-05	milk_pn12
R-HSA-450408	AUF1 (hnRNP D0) binds and destabilizes mRNA	8/130	37/10173	0.216216	16.9198	11.0369	1.61973e-08	2.53488e-06	1.59842e-06	5709/26986/5695/11047/3315/3312/5702/5692	8	Down	Reactome			-0.216216	1.59842e-06	milk_pn12
R-HSA-389957	Prefoldin mediated transfer of substrate to CCT/TriC	6/130	28/10173	0.214286	16.7687	9.50586	1.16025e-06	8.07021e-05	5.08883e-05	10693/10694/22948/10575/10574/10576	6	Down	Reactome			-0.214286	5.08883e-05	milk_pn12
R-HSA-6814122	Cooperation of PDCL (PhLP1) and TRiC/CCT in G-protein beta folding	7/130	35/10173	0.2	15.6508	9.87783	2.3626e-07	2.11284e-05	1.33229e-05	10693/2776/10694/22948/10575/10574/10576	7	Down	Reactome			-0.2	1.33229e-05	milk_pn12
R-HSA-499943	Interconversion of nucleotide di- and triphosphates	5/130	27/10173	0.185185	14.4915	7.98613	2.03223e-05	0.000489298	0.000308537	7295/4831/51727/203/2745	5	Down	Reactome			-0.185185	0.000308537	milk_pn12
R-HSA-389958	Cooperation of Prefoldin and TriC/CCT in actin and tubulin folding	6/130	33/10173	0.181818	14.228	8.65913	3.23697e-06	0.000126646	7.98595e-05	10693/10694/22948/10575/10574/10576	6	Down	Reactome			-0.181818	7.98595e-05	milk_pn12
R-HSA-390471	Association of TriC/CCT with target proteins during biosynthesis	6/130	33/10173	0.181818	14.228	8.65913	3.23697e-06	0.000126646	7.98595e-05	10693/10694/22948/10575/10574/10576	6	Down	Reactome			-0.181818	7.98595e-05	milk_pn12
R-HSA-8873719	RAB geranylgeranylation	11/130	63/10173	0.174603	13.6634	11.4706	3.39245e-10	1.06184e-07	6.69563e-08	5872/5864/51762/22931/376267/5862/5861/23011/81876/5868/5869	11	Down	Reactome			-0.174603	6.69563e-08	milk_pn12
R-HSA-1236978	Cross-presentation of soluble exogenous antigens (endosomes)	6/130	35/10173	0.171429	13.4149	8.37039	4.64555e-06	0.000161562	0.000101876	5709/5695/11047/5721/5702/5692	6	Down	Reactome			-0.171429	0.000101876	milk_pn12
R-HSA-9604323	Negative regulation of NOTCH4 signaling	6/130	38/10173	0.157895	12.3559	7.97891	7.657e-06	0.000252278	0.000159079	5709/5695/11047/7534/5702/5692	6	Down	Reactome			-0.157895	0.000159079	milk_pn12
R-HSA-169911	Regulation of Apoptosis	5/130	32/10173	0.15625	12.2272	7.23682	4.81619e-05	0.000886745	0.000559155	5709/5695/11047/5702/5692	5	Down	Reactome			-0.15625	0.000559155	milk_pn12
R-HSA-180534	Vpu mediated degradation of CD4	5/130	32/10173	0.15625	12.2272	7.23682	4.81619e-05	0.000886745	0.000559155	5709/5695/11047/5702/5692	5	Down	Reactome			-0.15625	0.000559155	milk_pn12
R-HSA-211733	Regulation of activated PAK-2p34 by proteasome mediated degradation	5/130	32/10173	0.15625	12.2272	7.23682	4.81619e-05	0.000886745	0.000559155	5709/5695/11047/5702/5692	5	Down	Reactome			-0.15625	0.000559155	milk_pn12
R-HSA-349425	Autodegradation of the E3 ubiquitin ligase COP1	5/130	32/10173	0.15625	12.2272	7.23682	4.81619e-05	0.000886745	0.000559155	5709/5695/11047/5702/5692	5	Down	Reactome			-0.15625	0.000559155	milk_pn12
R-HSA-350562	Regulation of ornithine decarboxylase (ODC)	5/130	32/10173	0.15625	12.2272	7.23682	4.81619e-05	0.000886745	0.000559155	5709/5695/11047/5702/5692	5	Down	Reactome			-0.15625	0.000559155	milk_pn12
R-HSA-9907900	Proteasome assembly	7/130	46/10173	0.152174	11.9082	8.43596	1.67335e-06	9.52291e-05	6.00486e-05	5709/5695/11047/5721/5711/5702/5692	7	Down	Reactome			-0.152174	6.00486e-05	milk_pn12
R-HSA-75815	Ubiquitin-dependent degradation of Cyclin D	5/130	33/10173	0.151515	11.8566	7.10684	5.61842e-05	0.000976981	0.000616055	5709/5695/11047/5702/5692	5	Down	Reactome			-0.151515	0.000616055	milk_pn12
R-HSA-180585	Vif-mediated degradation of APOBEC3G	5/130	34/10173	0.147059	11.5079	6.98235	6.52005e-05	0.00107409	0.000677291	5709/5695/11047/5702/5692	5	Down	Reactome			-0.147059	0.000677291	milk_pn12
R-HSA-9912633	Antigen processing: Ub, ATP-independent proteasomal degradation	3/64	15/10173	0.2	31.7906	9.49509	0.000102385	0.0119023	0.00743639	5690/5685/5687	3	Down	Reactome			-0.2	0.00743639	fecal_tri3
R-HSA-70263	Gluconeogenesis	3/64	24/10173	0.125	19.8691	7.36352	0.000437398	0.0174155	0.010881	2023/5224/5223	3	Down	Reactome			-0.125	0.010881	fecal_tri3
R-HSA-169911	Regulation of Apoptosis	3/64	32/10173	0.09375	14.9019	6.26681	0.00103412	0.0174155	0.010881	5690/5685/5687	3	Down	Reactome			-0.09375	0.010881	fecal_tri3
R-HSA-180534	Vpu mediated degradation of CD4	3/64	32/10173	0.09375	14.9019	6.26681	0.00103412	0.0174155	0.010881	5690/5685/5687	3	Down	Reactome			-0.09375	0.010881	fecal_tri3
R-HSA-211733	Regulation of activated PAK-2p34 by proteasome mediated degradation	3/64	32/10173	0.09375	14.9019	6.26681	0.00103412	0.0174155	0.010881	5690/5685/5687	3	Down	Reactome			-0.09375	0.010881	fecal_tri3
R-HSA-349425	Autodegradation of the E3 ubiquitin ligase COP1	3/64	32/10173	0.09375	14.9019	6.26681	0.00103412	0.0174155	0.010881	5690/5685/5687	3	Down	Reactome			-0.09375	0.010881	fecal_tri3
R-HSA-350562	Regulation of ornithine decarboxylase (ODC)	3/64	32/10173	0.09375	14.9019	6.26681	0.00103412	0.0174155	0.010881	5690/5685/5687	3	Down	Reactome			-0.09375	0.010881	fecal_tri3
R-HSA-75815	Ubiquitin-dependent degradation of Cyclin D	3/64	33/10173	0.0909091	14.4503	6.15756	0.00113245	0.0174155	0.010881	5690/5685/5687	3	Down	Reactome			-0.0909091	0.010881	fecal_tri3
R-HSA-180585	Vif-mediated degradation of APOBEC3G	3/64	34/10173	0.0882353	14.0253	6.05296	0.00123649	0.0174155	0.010881	5690/5685/5687	3	Down	Reactome			-0.0882353	0.010881	fecal_tri3
R-HSA-9762114	GSK3B and BTRC:CUL1-mediated-degradation of NFE2L2	3/64	34/10173	0.0882353	14.0253	6.05296	0.00123649	0.0174155	0.010881	5690/5685/5687	3	Down	Reactome			-0.0882353	0.010881	fecal_tri3
hsa00860	Porphyrin metabolism	4/63	46/9370	0.0869565	12.9331	6.67485	0.000245074	0.00438683	0.00350843	2512/1356/2495/79799	4	Down	KEGG	Metabolism	Metabolism of cofactors and vitamins	-0.0869565	0.00350843	fecal_tri3
hsa03050	Proteasome	4/63	46/9370	0.0869565	12.9331	6.67485	0.000245074	0.00438683	0.00350843	5690/5685/5688/5687	4	Down	KEGG	Genetic Information Processing	Folding, sorting and degradation	-0.0869565	0.00350843	fecal_tri3
R-HSA-1236978	Cross-presentation of soluble exogenous antigens (endosomes)	3/64	35/10173	0.0857143	13.6246	5.95269	0.00134637	0.0174155	0.010881	5690/5685/5687	3	Down	Reactome			-0.0857143	0.010881	fecal_tri3
R-HSA-174113	SCF-beta-TrCP mediated degradation of Emi1	3/64	35/10173	0.0857143	13.6246	5.95269	0.00134637	0.0174155	0.010881	5690/5685/5687	3	Down	Reactome			-0.0857143	0.010881	fecal_tri3
R-HSA-4641257	Degradation of AXIN	3/64	35/10173	0.0857143	13.6246	5.95269	0.00134637	0.0174155	0.010881	5690/5685/5687	3	Down	Reactome			-0.0857143	0.010881	fecal_tri3
R-HSA-5610780	Degradation of GLI1 by the proteasome	3/64	35/10173	0.0857143	13.6246	5.95269	0.00134637	0.0174155	0.010881	5690/5685/5687	3	Down	Reactome			-0.0857143	0.010881	fecal_tri3
R-HSA-9929356	GSK3B-mediated proteasomal degradation of PD-L1(CD274)	3/64	35/10173	0.0857143	13.6246	5.95269	0.00134637	0.0174155	0.010881	5690/5685/5687	3	Down	Reactome			-0.0857143	0.010881	fecal_tri3
R-HSA-9764561	Regulation of CDH1 Function	4/64	47/10173	0.0851064	13.5279	6.84933	0.000207432	0.016076	0.0100441	5690/5685/60/5687	4	Down	Reactome			-0.0851064	0.0100441	fecal_tri3
R-HSA-5610783	Degradation of GLI2 by the proteasome	3/64	36/10173	0.0833333	13.2461	5.85643	0.00146221	0.0174155	0.010881	5690/5685/5687	3	Down	Reactome			-0.0833333	0.010881	fecal_tri3
R-HSA-5610785	GLI3 is processed to GLI3R by the proteasome	3/64	36/10173	0.0833333	13.2461	5.85643	0.00146221	0.0174155	0.010881	5690/5685/5687	3	Down	Reactome			-0.0833333	0.010881	fecal_tri3
R-HSA-156902	Peptide chain elongation	8/43	89/10173	0.0898876	21.2657	12.5105	2.8147e-09	1.10919e-07	8.06515e-08	3921/23521/6208/4736/6156/6141/6134/6193	8	Up	Reactome			0.0898876	8.06515e-08	fecal_tri3
R-HSA-192823	Viral mRNA Translation	8/43	89/10173	0.0898876	21.2657	12.5105	2.8147e-09	1.10919e-07	8.06515e-08	3921/23521/6208/4736/6156/6141/6134/6193	8	Up	Reactome			0.0898876	8.06515e-08	fecal_tri3
R-HSA-9954714	PELO:HBS1L and ABCE1 dissociate a ribosome on a non-stop mRNA	8/43	90/10173	0.0888889	21.0295	12.4345	3.07981e-09	1.10919e-07	8.06515e-08	3921/23521/6208/4736/6156/6141/6134/6193	8	Up	Reactome			0.0888889	8.06515e-08	fecal_tri3
R-HSA-156842	Eukaryotic Translation Elongation	8/43	91/10173	0.0879121	20.7984	12.3597	3.36629e-09	1.10919e-07	8.06515e-08	3921/23521/6208/4736/6156/6141/6134/6193	8	Up	Reactome			0.0879121	8.06515e-08	fecal_tri3
R-HSA-975956	Nonsense Mediated Decay (NMD) independent of the Exon Junction Complex (EJC)	8/43	92/10173	0.0869565	20.5723	12.2862	3.67556e-09	1.10919e-07	8.06515e-08	3921/23521/6208/4736/6156/6141/6134/6193	8	Up	Reactome			0.0869565	8.06515e-08	fecal_tri3
R-HSA-2408557	Selenocysteine synthesis	8/43	93/10173	0.0860215	20.3511	12.2138	4.00913e-09	1.10919e-07	8.06515e-08	3921/23521/6208/4736/6156/6141/6134/6193	8	Up	Reactome			0.0860215	8.06515e-08	fecal_tri3
R-HSA-72764	Eukaryotic Translation Termination	8/43	93/10173	0.0860215	20.3511	12.2138	4.00913e-09	1.10919e-07	8.06515e-08	3921/23521/6208/4736/6156/6141/6134/6193	8	Up	Reactome			0.0860215	8.06515e-08	fecal_tri3
R-HSA-9954716	ZNF598 and the Ribosome-associated Quality Trigger (RQT) complex dissociate a ribosome stalled on a no-go mRNA	8/43	96/10173	0.0833333	19.7151	12.0031	5.17204e-09	1.28784e-07	9.36412e-08	3921/23521/6208/4736/6156/6141/6134/6193	8	Up	Reactome			0.0833333	9.36412e-08	fecal_tri3
R-HSA-9735869	SARS-CoV-1 modulates host translation machinery	3/43	36/10173	0.0833333	19.7151	7.32861	0.000455747	0.00343882	0.00250043	3921/6208/6193	3	Up	Reactome			0.0833333	0.00250043	fecal_tri3
R-HSA-9633012	Response of EIF2AK4 (GCN2) to amino acid deficiency	8/43	99/10173	0.0808081	19.1177	11.8019	6.61622e-09	1.49767e-07	1.08899e-07	3921/23521/6208/4736/6156/6141/6134/6193	8	Up	Reactome			0.0808081	1.08899e-07	fecal_tri3
R-HSA-1799339	SRP-dependent cotranslational protein targeting to membrane	9/43	112/10173	0.0803571	19.011	12.487	7.08162e-10	1.03378e-07	7.51681e-08	3921/10952/23521/6208/4736/6156/6141/6134/6193	9	Up	Reactome			0.0803571	7.51681e-08	fecal_tri3
R-HSA-72689	Formation of a pool of free 40S subunits	8/43	101/10173	0.0792079	18.7391	11.6726	7.76222e-09	1.61066e-07	1.17114e-07	3921/23521/6208/4736/6156/6141/6134/6193	8	Up	Reactome			0.0792079	1.17114e-07	fecal_tri3
R-HSA-2408522	Selenoamino acid metabolism	9/43	114/10173	0.0789474	18.6775	12.366	8.30345e-10	1.03378e-07	7.51681e-08	3376/3921/23521/6208/4736/6156/6141/6134/6193	9	Up	Reactome			0.0789474	7.51681e-08	fecal_tri3
R-HSA-156827	L13a-mediated translational silencing of Ceruloplasmin expression	8/43	107/10173	0.0747664	17.6883	11.306	1.22901e-08	2.04015e-07	1.48344e-07	3921/23521/6208/4736/6156/6141/6134/6193	8	Up	Reactome			0.0747664	1.48344e-07	fecal_tri3
R-HSA-927802	Nonsense-Mediated Decay (NMD)	8/43	107/10173	0.0747664	17.6883	11.306	1.22901e-08	2.04015e-07	1.48344e-07	3921/23521/6208/4736/6156/6141/6134/6193	8	Up	Reactome			0.0747664	1.48344e-07	fecal_tri3
R-HSA-975957	Nonsense Mediated Decay (NMD) enhanced by the Exon Junction Complex (EJC)	8/43	107/10173	0.0747664	17.6883	11.306	1.22901e-08	2.04015e-07	1.48344e-07	3921/23521/6208/4736/6156/6141/6134/6193	8	Up	Reactome			0.0747664	1.48344e-07	fecal_tri3
R-HSA-72706	GTP hydrolysis and joining of the 60S ribosomal subunit	8/43	108/10173	0.0740741	17.5245	11.2478	1.32325e-08	2.0593e-07	1.49736e-07	3921/23521/6208/4736/6156/6141/6134/6193	8	Up	Reactome			0.0740741	1.49736e-07	fecal_tri3
R-HSA-72613	Eukaryotic Translation Initiation	8/43	115/10173	0.0695652	16.4578	10.8611	2.17593e-08	3.01004e-07	2.18866e-07	3921/23521/6208/4736/6156/6141/6134/6193	8	Up	Reactome			0.0695652	2.18866e-07	fecal_tri3
R-HSA-72737	Cap-dependent Translation Initiation	8/43	115/10173	0.0695652	16.4578	10.8611	2.17593e-08	3.01004e-07	2.18866e-07	3921/23521/6208/4736/6156/6141/6134/6193	8	Up	Reactome			0.0695652	2.18866e-07	fecal_tri3
R-HSA-9692914	SARS-CoV-1-host interactions	5/43	79/10173	0.0632911	14.9735	8.12307	1.89887e-05	0.000157606	0.000114598	2810/3921/6208/6193/7532	5	Up	Reactome			0.0632911	0.000114598	fecal_tri3

## Sheet: proteome_feature
pathway	geneID	dataset	sample_type	direction_clean	symbol	protein_name	uniprot
negative regulation of blood coagulation	350	depleted_tri2	Plasma depleted	Up	APOH	apolipoprotein H	A0A384NKM6
negative regulation of blood coagulation	5624	depleted_tri2	Plasma depleted	Up	PROC	protein C, inactivator of coagulation factors Va and VIIIa	B4DPQ7
negative regulation of blood coagulation	1361	depleted_tri2	Plasma depleted	Up	CPB2	carboxypeptidase B2	A0A087WSY5
negative regulation of blood coagulation	5345	depleted_tri2	Plasma depleted	Up	SERPINF2	serpin family F member 2	A0A0G2JPA8
Complement and coagulation cascades	5648	depleted_tri2	Plasma depleted	Up	MASP1	MBL associated serine protease 1	F8W876
Complement and coagulation cascades	5624	depleted_tri2	Plasma depleted	Up	PROC	protein C, inactivator of coagulation factors Va and VIIIa	B4DPQ7
Complement and coagulation cascades	1361	depleted_tri2	Plasma depleted	Up	CPB2	carboxypeptidase B2	A0A087WSY5
Complement and coagulation cascades	5345	depleted_tri2	Plasma depleted	Up	SERPINF2	serpin family F member 2	A0A0G2JPA8
Complement and coagulation cascades	10747	depleted_tri2	Plasma depleted	Up	MASP2	MBL associated serine protease 2	A0A8V8TQL2
Cholesterol metabolism	5360	depleted_tri2	Plasma depleted	Up	PLTP	phospholipid transfer protein	Q53H91
Cholesterol metabolism	4018	depleted_tri2	Plasma depleted	Up	LPA	lipoprotein(a)	P08519
Cholesterol metabolism	350	depleted_tri2	Plasma depleted	Up	APOH	apolipoprotein H	A0A384NKM6
Platelet degranulation	3671	depleted_tri2	Plasma depleted	Up	ISLR	immunoglobulin superfamily containing leucine rich repeat	A0A146E5L3
Platelet degranulation	5267	depleted_tri2	Plasma depleted	Up	SERPINA4	serpin family A member 4	B2R815
Platelet degranulation	3699	depleted_tri2	Plasma depleted	Up	ITIH3	inter-alpha-trypsin inhibitor heavy chain 3	A0A994J439
Platelet degranulation	197	depleted_tri2	Plasma depleted	Up	AHSG	alpha 2-HS glycoprotein	B7Z8Q2
Platelet degranulation	350	depleted_tri2	Plasma depleted	Up	APOH	apolipoprotein H	A0A384NKM6
Platelet degranulation	5345	depleted_tri2	Plasma depleted	Up	SERPINF2	serpin family F member 2	A0A0G2JPA8
Response to elevated platelet cytosolic Ca2+	3671	depleted_tri2	Plasma depleted	Up	ISLR	immunoglobulin superfamily containing leucine rich repeat	A0A146E5L3
Response to elevated platelet cytosolic Ca2+	5267	depleted_tri2	Plasma depleted	Up	SERPINA4	serpin family A member 4	B2R815
Response to elevated platelet cytosolic Ca2+	3699	depleted_tri2	Plasma depleted	Up	ITIH3	inter-alpha-trypsin inhibitor heavy chain 3	A0A994J439
Response to elevated platelet cytosolic Ca2+	197	depleted_tri2	Plasma depleted	Up	AHSG	alpha 2-HS glycoprotein	B7Z8Q2
Response to elevated platelet cytosolic Ca2+	350	depleted_tri2	Plasma depleted	Up	APOH	apolipoprotein H	A0A384NKM6
Response to elevated platelet cytosolic Ca2+	5345	depleted_tri2	Plasma depleted	Up	SERPINF2	serpin family F member 2	A0A0G2JPA8
African trypanosomiasis	3383	depleted_tri3	Plasma depleted	Up	ICAM1	intercellular adhesion molecule 1	A0A384MEK5
African trypanosomiasis	7412	depleted_tri3	Plasma depleted	Up	VCAM1	vascular cell adhesion molecule 1	A8K6R7
African trypanosomiasis	8542	depleted_tri3	Plasma depleted	Up	APOL1	apolipoprotein L1	A5PLQ4
Malaria	3383	depleted_tri3	Plasma depleted	Up	ICAM1	intercellular adhesion molecule 1	A0A384MEK5
Malaria	7412	depleted_tri3	Plasma depleted	Up	VCAM1	vascular cell adhesion molecule 1	A8K6R7
Malaria	3683	depleted_tri3	Plasma depleted	Up	ITGAL	integrin subunit alpha L	B2RAL6
Cysteine and methionine metabolism	4190	depleted_tri3	Plasma depleted	Up	MDH1	malate dehydrogenase 1	P40925
Cysteine and methionine metabolism	2937	depleted_tri3	Plasma depleted	Up	GSS	glutathione synthetase	A0A2R8Y430
Cysteine and methionine metabolism	3945	depleted_tri3	Plasma depleted	Up	LDHB	lactate dehydrogenase B	A0A3B3IS95
Glutathione metabolism	2878	depleted_tri3	Plasma depleted	Up	GPX3	glutathione peroxidase 3	P22352
Glutathione metabolism	290	depleted_tri3	Plasma depleted	Up	ANPEP	alanyl aminopeptidase, membrane	P15144
Glutathione metabolism	2937	depleted_tri3	Plasma depleted	Up	GSS	glutathione synthetase	A0A2R8Y430
RND2 GTPase cycle	23129	depleted_tri3	Plasma depleted	Up	PLXND1	plexin D1	A7E2C6
RND2 GTPase cycle	2802	depleted_tri3	Plasma depleted	Up	GOLGA3	golgin A3	A0A8I5KVX9
RND2 GTPase cycle	7037	depleted_tri3	Plasma depleted	Up	TFRC	transferrin receptor	A8K6Q8
chronic inflammatory response	7412	depleted_pn56	Plasma depleted	Up	VCAM1	vascular cell adhesion molecule 1	A8K6R7
chronic inflammatory response	6280	depleted_pn56	Plasma depleted	Up	S100A9	S100 calcium binding protein A9	B2R4M6
chronic inflammatory response	8876	depleted_pn56	Plasma depleted	Up	VNN1	vanin 1	A8K310
lipoprotein metabolic process	55937	depleted_pn56	Plasma depleted	Down	APOM	apolipoprotein M	A0A1U9X793
lipoprotein metabolic process	341	depleted_pn56	Plasma depleted	Down	APOC1	apolipoprotein C1	B2R526
lipoprotein metabolic process	344	depleted_pn56	Plasma depleted	Down	APOC2	apolipoprotein C2	A0A024R0T9
lipoprotein metabolic process	347	depleted_pn56	Plasma depleted	Down	APOD	apolipoprotein D	B2R579
lipoprotein metabolic process	1509	depleted_pn56	Plasma depleted	Down	CTSD	cathepsin D	A0A1B0GWE8
lipoprotein metabolic process	8542	depleted_pn56	Plasma depleted	Down	APOL1	apolipoprotein L1	A5PLQ4
complement activation, GZMK pathway	732	depleted_pn56	Plasma depleted	Down	C8B	complement C8 beta chain	A0A8Q3WL56
complement activation, GZMK pathway	731	depleted_pn56	Plasma depleted	Down	C8A	complement C8 alpha chain	A0A8Q3WL79
complement activation, GZMK pathway	733	depleted_pn56	Plasma depleted	Down	C8G	complement C8 gamma chain	P07360
Cholesterol metabolism	341	depleted_pn56	Plasma depleted	Down	APOC1	apolipoprotein C1	B2R526
Cholesterol metabolism	344	depleted_pn56	Plasma depleted	Down	APOC2	apolipoprotein C2	A0A024R0T9
Cholesterol metabolism	5360	depleted_pn56	Plasma depleted	Down	PLTP	phospholipid transfer protein	Q53H91
NR1H3 & NR1H2 regulate gene expression linked to cholesterol transport and efflux	341	depleted_pn56	Plasma depleted	Down	APOC1	apolipoprotein C1	B2R526
NR1H3 & NR1H2 regulate gene expression linked to cholesterol transport and efflux	344	depleted_pn56	Plasma depleted	Down	APOC2	apolipoprotein C2	A0A024R0T9
NR1H3 & NR1H2 regulate gene expression linked to cholesterol transport and efflux	347	depleted_pn56	Plasma depleted	Down	APOD	apolipoprotein D	B2R579
NR1H3 & NR1H2 regulate gene expression linked to cholesterol transport and efflux	5360	depleted_pn56	Plasma depleted	Down	PLTP	phospholipid transfer protein	Q53H91
NR1H2 and NR1H3-mediated signaling	341	depleted_pn56	Plasma depleted	Down	APOC1	apolipoprotein C1	B2R526
NR1H2 and NR1H3-mediated signaling	344	depleted_pn56	Plasma depleted	Down	APOC2	apolipoprotein C2	A0A024R0T9
NR1H2 and NR1H3-mediated signaling	347	depleted_pn56	Plasma depleted	Down	APOD	apolipoprotein D	B2R579
NR1H2 and NR1H3-mediated signaling	5360	depleted_pn56	Plasma depleted	Down	PLTP	phospholipid transfer protein	Q53H91
Regulation of Complement cascade	732	depleted_pn56	Plasma depleted	Down	C8B	complement C8 beta chain	A0A8Q3WL56
Regulation of Complement cascade	731	depleted_pn56	Plasma depleted	Down	C8A	complement C8 alpha chain	A0A8Q3WL79
Regulation of Complement cascade	733	depleted_pn56	Plasma depleted	Down	C8G	complement C8 gamma chain	P07360
Complement cascade	732	depleted_pn56	Plasma depleted	Down	C8B	complement C8 beta chain	A0A8Q3WL56
Complement cascade	731	depleted_pn56	Plasma depleted	Down	C8A	complement C8 alpha chain	A0A8Q3WL79
Complement cascade	733	depleted_pn56	Plasma depleted	Down	C8G	complement C8 gamma chain	P07360
triglyceride catabolic process	344	naive_tri3	Plasma naïve	Down	APOC2	apolipoprotein C2	A0A024R0T9
triglyceride catabolic process	345	naive_tri3	Plasma naïve	Down	APOC3	apolipoprotein C3	A3KPE2
triglyceride catabolic process	338	naive_tri3	Plasma naïve	Down	APOB	apolipoprotein B	A0AAG2UUW0
Cholesterol metabolism	344	naive_tri3	Plasma naïve	Down	APOC2	apolipoprotein C2	A0A024R0T9
Cholesterol metabolism	345	naive_tri3	Plasma naïve	Down	APOC3	apolipoprotein C3	A3KPE2
Cholesterol metabolism	338	naive_tri3	Plasma naïve	Down	APOB	apolipoprotein B	A0AAG2UUW0
Plasma lipoprotein assembly	344	naive_tri3	Plasma naïve	Down	APOC2	apolipoprotein C2	A0A024R0T9
Plasma lipoprotein assembly	346	naive_tri3	Plasma naïve	Down	APOC4	apolipoprotein C4	A5YAK2
Plasma lipoprotein assembly	345	naive_tri3	Plasma naïve	Down	APOC3	apolipoprotein C3	A3KPE2
Plasma lipoprotein assembly	338	naive_tri3	Plasma naïve	Down	APOB	apolipoprotein B	A0AAG2UUW0
Plasma lipoprotein assembly, remodeling, and clearance	344	naive_tri3	Plasma naïve	Down	APOC2	apolipoprotein C2	A0A024R0T9
Plasma lipoprotein assembly, remodeling, and clearance	346	naive_tri3	Plasma naïve	Down	APOC4	apolipoprotein C4	A5YAK2
Plasma lipoprotein assembly, remodeling, and clearance	345	naive_tri3	Plasma naïve	Down	APOC3	apolipoprotein C3	A3KPE2
Plasma lipoprotein assembly, remodeling, and clearance	338	naive_tri3	Plasma naïve	Down	APOB	apolipoprotein B	A0AAG2UUW0
Regulation of TLR by endogenous ligand	6279	naive_tri3	Plasma naïve	Down	S100A8	S100 calcium binding protein A8	P05109
Regulation of TLR by endogenous ligand	929	naive_tri3	Plasma naïve	Down	CD14	CD14 molecule	B2R888
Regulation of TLR by endogenous ligand	338	naive_tri3	Plasma naïve	Down	APOB	apolipoprotein B	A0AAG2UUW0
Plasma lipoprotein remodeling	344	naive_tri3	Plasma naïve	Down	APOC2	apolipoprotein C2	A0A024R0T9
Plasma lipoprotein remodeling	345	naive_tri3	Plasma naïve	Down	APOC3	apolipoprotein C3	A3KPE2
Plasma lipoprotein remodeling	338	naive_tri3	Plasma naïve	Down	APOB	apolipoprotein B	A0AAG2UUW0
Retinoid metabolism and transport	344	naive_tri3	Plasma naïve	Down	APOC2	apolipoprotein C2	A0A024R0T9
Retinoid metabolism and transport	345	naive_tri3	Plasma naïve	Down	APOC3	apolipoprotein C3	A3KPE2
Retinoid metabolism and transport	338	naive_tri3	Plasma naïve	Down	APOB	apolipoprotein B	A0AAG2UUW0
Metabolism of fat-soluble vitamins	344	naive_tri3	Plasma naïve	Down	APOC2	apolipoprotein C2	A0A024R0T9
Metabolism of fat-soluble vitamins	345	naive_tri3	Plasma naïve	Down	APOC3	apolipoprotein C3	A3KPE2
Metabolism of fat-soluble vitamins	338	naive_tri3	Plasma naïve	Down	APOB	apolipoprotein B	A0AAG2UUW0
complement activation	712	naive_pn12	Plasma naïve	Up	C1QA	complement C1q A chain	A0A024RAG6
complement activation	3426	naive_pn12	Plasma naïve	Up	CFI	complement factor I	A8K3L0
complement activation	714	naive_pn12	Plasma naïve	Up	C1QC	complement C1q C chain	A0A024RAA7
complement activation	713	naive_pn12	Plasma naïve	Up	C1QB	complement C1q B chain	A0A024RAB9
complement activation	2	naive_pn12	Plasma naïve	Up	A2M	alpha-2-macroglobulin	P01023
complement activation	727	naive_pn12	Plasma naïve	Up	C5	complement C5	A0A8Q3SID6
Complement and coagulation cascades	712	naive_pn12	Plasma naïve	Up	C1QA	complement C1q A chain	A0A024RAG6
Complement and coagulation cascades	3426	naive_pn12	Plasma naïve	Up	CFI	complement factor I	A8K3L0
Complement and coagulation cascades	714	naive_pn12	Plasma naïve	Up	C1QC	complement C1q C chain	A0A024RAA7
Complement and coagulation cascades	713	naive_pn12	Plasma naïve	Up	C1QB	complement C1q B chain	A0A024RAB9
Complement and coagulation cascades	2	naive_pn12	Plasma naïve	Up	A2M	alpha-2-macroglobulin	P01023
Complement and coagulation cascades	5265	naive_pn12	Plasma naïve	Up	SERPINA1	serpin family A member 1	A0A0G2JRN3
Complement and coagulation cascades	727	naive_pn12	Plasma naïve	Up	C5	complement C5	A0A8Q3SID6
Complement and coagulation cascades	2160	naive_pn12	Plasma naïve	Up	F11	coagulation factor XI	D3DP64
Staphylococcus aureus infection	712	naive_pn12	Plasma naïve	Up	C1QA	complement C1q A chain	A0A024RAG6
Staphylococcus aureus infection	3426	naive_pn12	Plasma naïve	Up	CFI	complement factor I	A8K3L0
Staphylococcus aureus infection	714	naive_pn12	Plasma naïve	Up	C1QC	complement C1q C chain	A0A024RAA7
Staphylococcus aureus infection	713	naive_pn12	Plasma naïve	Up	C1QB	complement C1q B chain	A0A024RAB9
Staphylococcus aureus infection	727	naive_pn12	Plasma naïve	Up	C5	complement C5	A0A8Q3SID6
Pertussis	712	naive_pn12	Plasma naïve	Up	C1QA	complement C1q A chain	A0A024RAG6
Pertussis	714	naive_pn12	Plasma naïve	Up	C1QC	complement C1q C chain	A0A024RAA7
Pertussis	713	naive_pn12	Plasma naïve	Up	C1QB	complement C1q B chain	A0A024RAB9
Pertussis	727	naive_pn12	Plasma naïve	Up	C5	complement C5	A0A8Q3SID6
Platelet degranulation	6414	naive_pn12	Plasma naïve	Up	SELENOP	selenoprotein P	A0A182DWH7
Platelet degranulation	5267	naive_pn12	Plasma naïve	Up	SERPINA4	serpin family A member 4	B2R815
Platelet degranulation	3700	naive_pn12	Plasma naïve	Up	ITIH4	inter-alpha-trypsin inhibitor heavy chain 4	B7Z544
Platelet degranulation	3273	naive_pn12	Plasma naïve	Up	HRG	histidine rich glycoprotein	B2R8I2
Platelet degranulation	2	naive_pn12	Plasma naïve	Up	A2M	alpha-2-macroglobulin	P01023
Platelet degranulation	3481	naive_pn12	Plasma naïve	Up	IGF2	insulin like growth factor 2	A8K6C9
Platelet degranulation	5265	naive_pn12	Plasma naïve	Up	SERPINA1	serpin family A member 1	A0A0G2JRN3
Response to elevated platelet cytosolic Ca2+	6414	naive_pn12	Plasma naïve	Up	SELENOP	selenoprotein P	A0A182DWH7
Response to elevated platelet cytosolic Ca2+	5267	naive_pn12	Plasma naïve	Up	SERPINA4	serpin family A member 4	B2R815
Response to elevated platelet cytosolic Ca2+	3700	naive_pn12	Plasma naïve	Up	ITIH4	inter-alpha-trypsin inhibitor heavy chain 4	B7Z544
Response to elevated platelet cytosolic Ca2+	3273	naive_pn12	Plasma naïve	Up	HRG	histidine rich glycoprotein	B2R8I2
Response to elevated platelet cytosolic Ca2+	2	naive_pn12	Plasma naïve	Up	A2M	alpha-2-macroglobulin	P01023
Response to elevated platelet cytosolic Ca2+	3481	naive_pn12	Plasma naïve	Up	IGF2	insulin like growth factor 2	A8K6C9
Response to elevated platelet cytosolic Ca2+	5265	naive_pn12	Plasma naïve	Up	SERPINA1	serpin family A member 1	A0A0G2JRN3
Regulation of Complement cascade	712	naive_pn12	Plasma naïve	Up	C1QA	complement C1q A chain	A0A024RAG6
Regulation of Complement cascade	714	naive_pn12	Plasma naïve	Up	C1QC	complement C1q C chain	A0A024RAA7
Regulation of Complement cascade	713	naive_pn12	Plasma naïve	Up	C1QB	complement C1q B chain	A0A024RAB9
Regulation of Complement cascade	727	naive_pn12	Plasma naïve	Up	C5	complement C5	A0A8Q3SID6
Complement cascade	712	naive_pn12	Plasma naïve	Up	C1QA	complement C1q A chain	A0A024RAG6
Complement cascade	714	naive_pn12	Plasma naïve	Up	C1QC	complement C1q C chain	A0A024RAA7
Complement cascade	713	naive_pn12	Plasma naïve	Up	C1QB	complement C1q B chain	A0A024RAB9
Complement cascade	727	naive_pn12	Plasma naïve	Up	C5	complement C5	A0A8Q3SID6
Initial triggering of complement	712	naive_pn12	Plasma naïve	Up	C1QA	complement C1q A chain	A0A024RAG6
Initial triggering of complement	714	naive_pn12	Plasma naïve	Up	C1QC	complement C1q C chain	A0A024RAA7
Initial triggering of complement	713	naive_pn12	Plasma naïve	Up	C1QB	complement C1q B chain	A0A024RAB9
complement activation	731	naive_pn56	Plasma naïve	Down	C8A	complement C8 alpha chain	A0A8Q3WL79
complement activation	3426	naive_pn56	Plasma naïve	Down	CFI	complement factor I	A8K3L0
complement activation	10877	naive_pn56	Plasma naïve	Down	CFHR4	complement factor H related 4	A8K9N7
complement activation	729	naive_pn56	Plasma naïve	Down	C6	complement C6	A8K8Z4
complement activation	720	naive_pn56	Plasma naïve	Down	C4A	complement C4A (Chido/Rodgers blood group)	A0A140TA44
complement activation	715	naive_pn56	Plasma naïve	Down	C1R	complement C1r	A6NJQ8
complement activation, GZMK pathway	731	naive_pn56	Plasma naïve	Down	C8A	complement C8 alpha chain	A0A8Q3WL79
complement activation, GZMK pathway	729	naive_pn56	Plasma naïve	Down	C6	complement C6	A8K8Z4
complement activation, GZMK pathway	720	naive_pn56	Plasma naïve	Down	C4A	complement C4A (Chido/Rodgers blood group)	A0A140TA44
Complement and coagulation cascades	2161	naive_pn56	Plasma naïve	Down	F12	coagulation factor XII	A0AA51Z0K1
Complement and coagulation cascades	731	naive_pn56	Plasma naïve	Down	C8A	complement C8 alpha chain	A0A8Q3WL79
Complement and coagulation cascades	3426	naive_pn56	Plasma naïve	Down	CFI	complement factor I	A8K3L0
Complement and coagulation cascades	10877	naive_pn56	Plasma naïve	Down	CFHR4	complement factor H related 4	A8K9N7
Complement and coagulation cascades	729	naive_pn56	Plasma naïve	Down	C6	complement C6	A8K8Z4
Complement and coagulation cascades	720	naive_pn56	Plasma naïve	Down	C4A	complement C4A (Chido/Rodgers blood group)	A0A140TA44
Complement and coagulation cascades	5627	naive_pn56	Plasma naïve	Down	PROS1	protein S	A0A0S2Z4K3
Complement and coagulation cascades	2153	naive_pn56	Plasma naïve	Down	F5	coagulation factor V	A0A0A0MRJ7
Complement and coagulation cascades	715	naive_pn56	Plasma naïve	Down	C1R	complement C1r	A6NJQ8
Regulation of Complement cascade	731	naive_pn56	Plasma naïve	Down	C8A	complement C8 alpha chain	A0A8Q3WL79
Regulation of Complement cascade	729	naive_pn56	Plasma naïve	Down	C6	complement C6	A8K8Z4
Regulation of Complement cascade	1370	naive_pn56	Plasma naïve	Down	CPN2	carboxypeptidase N subunit 2	B2RPE7
Regulation of Complement cascade	1369	naive_pn56	Plasma naïve	Down	CPN1	carboxypeptidase N subunit 1	B1AP59
Regulation of Complement cascade	720	naive_pn56	Plasma naïve	Down	C4A	complement C4A (Chido/Rodgers blood group)	A0A140TA44
Regulation of Complement cascade	5627	naive_pn56	Plasma naïve	Down	PROS1	protein S	A0A0S2Z4K3
Regulation of Complement cascade	715	naive_pn56	Plasma naïve	Down	C1R	complement C1r	A6NJQ8
Complement cascade	731	naive_pn56	Plasma naïve	Down	C8A	complement C8 alpha chain	A0A8Q3WL79
Complement cascade	729	naive_pn56	Plasma naïve	Down	C6	complement C6	A8K8Z4
Complement cascade	1370	naive_pn56	Plasma naïve	Down	CPN2	carboxypeptidase N subunit 2	B2RPE7
Complement cascade	1369	naive_pn56	Plasma naïve	Down	CPN1	carboxypeptidase N subunit 1	B1AP59
Complement cascade	720	naive_pn56	Plasma naïve	Down	C4A	complement C4A (Chido/Rodgers blood group)	A0A140TA44
Complement cascade	5627	naive_pn56	Plasma naïve	Down	PROS1	protein S	A0A0S2Z4K3
Complement cascade	715	naive_pn56	Plasma naïve	Down	C1R	complement C1r	A6NJQ8
Plasma lipoprotein assembly	344	naive_pn56	Plasma naïve	Down	APOC2	apolipoprotein C2	A0A024R0T9
Plasma lipoprotein assembly	346	naive_pn56	Plasma naïve	Down	APOC4	apolipoprotein C4	A5YAK2
Plasma lipoprotein assembly	341	naive_pn56	Plasma naïve	Down	APOC1	apolipoprotein C1	B2R526
NR1H3 & NR1H2 regulate gene expression linked to cholesterol transport and efflux	344	naive_pn56	Plasma naïve	Down	APOC2	apolipoprotein C2	A0A024R0T9
NR1H3 & NR1H2 regulate gene expression linked to cholesterol transport and efflux	346	naive_pn56	Plasma naïve	Down	APOC4	apolipoprotein C4	A5YAK2
NR1H3 & NR1H2 regulate gene expression linked to cholesterol transport and efflux	341	naive_pn56	Plasma naïve	Down	APOC1	apolipoprotein C1	B2R526
Formation of Fibrin Clot (Clotting Cascade)	2161	naive_pn56	Plasma naïve	Down	F12	coagulation factor XII	A0AA51Z0K1
Formation of Fibrin Clot (Clotting Cascade)	5627	naive_pn56	Plasma naïve	Down	PROS1	protein S	A0A0S2Z4K3
Formation of Fibrin Clot (Clotting Cascade)	2153	naive_pn56	Plasma naïve	Down	F5	coagulation factor V	A0A0A0MRJ7
NR1H2 and NR1H3-mediated signaling	344	naive_pn56	Plasma naïve	Down	APOC2	apolipoprotein C2	A0A024R0T9
NR1H2 and NR1H3-mediated signaling	346	naive_pn56	Plasma naïve	Down	APOC4	apolipoprotein C4	A5YAK2
NR1H2 and NR1H3-mediated signaling	341	naive_pn56	Plasma naïve	Down	APOC1	apolipoprotein C1	B2R526
Folding of actin by CCT/TriC	10574	milk_pn12	Milk	Down	CCT7	chaperonin containing TCP1 subunit 7	Q99832
positive regulation of telomere maintenance via telomerase	10574	milk_pn12	Milk	Down	CCT7	chaperonin containing TCP1 subunit 7	Q99832
Formation of tubulin folding intermediates by CCT/TriC	10574	milk_pn12	Milk	Down	CCT7	chaperonin containing TCP1 subunit 7	Q99832
Prefoldin mediated transfer of substrate to CCT/TriC	10574	milk_pn12	Milk	Down	CCT7	chaperonin containing TCP1 subunit 7	Q99832
Cooperation of PDCL (PhLP1) and TRiC/CCT in G-protein beta folding	10574	milk_pn12	Milk	Down	CCT7	chaperonin containing TCP1 subunit 7	Q99832
Cooperation of Prefoldin and TriC/CCT in actin and tubulin folding	10574	milk_pn12	Milk	Down	CCT7	chaperonin containing TCP1 subunit 7	Q99832
Association of TriC/CCT with target proteins during biosynthesis	10574	milk_pn12	Milk	Down	CCT7	chaperonin containing TCP1 subunit 7	Q99832
Folding of actin by CCT/TriC	10575	milk_pn12	Milk	Down	CCT4	chaperonin containing TCP1 subunit 4	A8K3C3
positive regulation of telomere maintenance via telomerase	10575	milk_pn12	Milk	Down	CCT4	chaperonin containing TCP1 subunit 4	A8K3C3
Formation of tubulin folding intermediates by CCT/TriC	10575	milk_pn12	Milk	Down	CCT4	chaperonin containing TCP1 subunit 4	A8K3C3
Prefoldin mediated transfer of substrate to CCT/TriC	10575	milk_pn12	Milk	Down	CCT4	chaperonin containing TCP1 subunit 4	A8K3C3
Cooperation of PDCL (PhLP1) and TRiC/CCT in G-protein beta folding	10575	milk_pn12	Milk	Down	CCT4	chaperonin containing TCP1 subunit 4	A8K3C3
Cooperation of Prefoldin and TriC/CCT in actin and tubulin folding	10575	milk_pn12	Milk	Down	CCT4	chaperonin containing TCP1 subunit 4	A8K3C3
Association of TriC/CCT with target proteins during biosynthesis	10575	milk_pn12	Milk	Down	CCT4	chaperonin containing TCP1 subunit 4	A8K3C3
Folding of actin by CCT/TriC	10576	milk_pn12	Milk	Down	CCT2	chaperonin containing TCP1 subunit 2	B7Z4R3
positive regulation of telomere maintenance via telomerase	10576	milk_pn12	Milk	Down	CCT2	chaperonin containing TCP1 subunit 2	B7Z4R3
Formation of tubulin folding intermediates by CCT/TriC	10576	milk_pn12	Milk	Down	CCT2	chaperonin containing TCP1 subunit 2	B7Z4R3
Prefoldin mediated transfer of substrate to CCT/TriC	10576	milk_pn12	Milk	Down	CCT2	chaperonin containing TCP1 subunit 2	B7Z4R3
Cooperation of PDCL (PhLP1) and TRiC/CCT in G-protein beta folding	10576	milk_pn12	Milk	Down	CCT2	chaperonin containing TCP1 subunit 2	B7Z4R3
Cooperation of Prefoldin and TriC/CCT in actin and tubulin folding	10576	milk_pn12	Milk	Down	CCT2	chaperonin containing TCP1 subunit 2	B7Z4R3
Association of TriC/CCT with target proteins during biosynthesis	10576	milk_pn12	Milk	Down	CCT2	chaperonin containing TCP1 subunit 2	B7Z4R3
Folding of actin by CCT/TriC	10693	milk_pn12	Milk	Down	CCT6B	chaperonin containing TCP1 subunit 6B	Q92526
Formation of tubulin folding intermediates by CCT/TriC	10693	milk_pn12	Milk	Down	CCT6B	chaperonin containing TCP1 subunit 6B	Q92526
Prefoldin mediated transfer of substrate to CCT/TriC	10693	milk_pn12	Milk	Down	CCT6B	chaperonin containing TCP1 subunit 6B	Q92526
Cooperation of PDCL (PhLP1) and TRiC/CCT in G-protein beta folding	10693	milk_pn12	Milk	Down	CCT6B	chaperonin containing TCP1 subunit 6B	Q92526
Cooperation of Prefoldin and TriC/CCT in actin and tubulin folding	10693	milk_pn12	Milk	Down	CCT6B	chaperonin containing TCP1 subunit 6B	Q92526
Association of TriC/CCT with target proteins during biosynthesis	10693	milk_pn12	Milk	Down	CCT6B	chaperonin containing TCP1 subunit 6B	Q92526
Folding of actin by CCT/TriC	10694	milk_pn12	Milk	Down	CCT8	chaperonin containing TCP1 subunit 8	Q53HU0
positive regulation of telomere maintenance via telomerase	10694	milk_pn12	Milk	Down	CCT8	chaperonin containing TCP1 subunit 8	Q53HU0
Formation of tubulin folding intermediates by CCT/TriC	10694	milk_pn12	Milk	Down	CCT8	chaperonin containing TCP1 subunit 8	Q53HU0
Prefoldin mediated transfer of substrate to CCT/TriC	10694	milk_pn12	Milk	Down	CCT8	chaperonin containing TCP1 subunit 8	Q53HU0
Cooperation of PDCL (PhLP1) and TRiC/CCT in G-protein beta folding	10694	milk_pn12	Milk	Down	CCT8	chaperonin containing TCP1 subunit 8	Q53HU0
Cooperation of Prefoldin and TriC/CCT in actin and tubulin folding	10694	milk_pn12	Milk	Down	CCT8	chaperonin containing TCP1 subunit 8	Q53HU0
Association of TriC/CCT with target proteins during biosynthesis	10694	milk_pn12	Milk	Down	CCT8	chaperonin containing TCP1 subunit 8	Q53HU0
positive regulation of telomere maintenance via telomerase	10728	milk_pn12	Milk	Down	PTGES3	prostaglandin E synthase 3	Q15185
AUF1 (hnRNP D0) binds and destabilizes mRNA	11047	milk_pn12	Milk	Down	ADRM1	ADRM1 26S proteasome ubiquitin receptor	A0A087WX59
Cross-presentation of soluble exogenous antigens (endosomes)	11047	milk_pn12	Milk	Down	ADRM1	ADRM1 26S proteasome ubiquitin receptor	A0A087WX59
Negative regulation of NOTCH4 signaling	11047	milk_pn12	Milk	Down	ADRM1	ADRM1 26S proteasome ubiquitin receptor	A0A087WX59
Regulation of Apoptosis	11047	milk_pn12	Milk	Down	ADRM1	ADRM1 26S proteasome ubiquitin receptor	A0A087WX59
Vpu mediated degradation of CD4	11047	milk_pn12	Milk	Down	ADRM1	ADRM1 26S proteasome ubiquitin receptor	A0A087WX59
Regulation of activated PAK-2p34 by proteasome mediated degradation	11047	milk_pn12	Milk	Down	ADRM1	ADRM1 26S proteasome ubiquitin receptor	A0A087WX59
Autodegradation of the E3 ubiquitin ligase COP1	11047	milk_pn12	Milk	Down	ADRM1	ADRM1 26S proteasome ubiquitin receptor	A0A087WX59
Regulation of ornithine decarboxylase (ODC)	11047	milk_pn12	Milk	Down	ADRM1	ADRM1 26S proteasome ubiquitin receptor	A0A087WX59
Proteasome assembly	11047	milk_pn12	Milk	Down	ADRM1	ADRM1 26S proteasome ubiquitin receptor	A0A087WX59
Ubiquitin-dependent degradation of Cyclin D	11047	milk_pn12	Milk	Down	ADRM1	ADRM1 26S proteasome ubiquitin receptor	A0A087WX59
Vif-mediated degradation of APOBEC3G	11047	milk_pn12	Milk	Down	ADRM1	ADRM1 26S proteasome ubiquitin receptor	A0A087WX59
Interconversion of nucleotide di- and triphosphates	203	milk_pn12	Milk	Down	AK1	adenylate kinase 1	P00568
RAB geranylgeranylation	22931	milk_pn12	Milk	Down	RAB18	RAB18, member RAS oncogene family	Q9NP72
Folding of actin by CCT/TriC	22948	milk_pn12	Milk	Down	CCT5	chaperonin containing TCP1 subunit 5	B4DX08
positive regulation of telomere maintenance via telomerase	22948	milk_pn12	Milk	Down	CCT5	chaperonin containing TCP1 subunit 5	B4DX08
Formation of tubulin folding intermediates by CCT/TriC	22948	milk_pn12	Milk	Down	CCT5	chaperonin containing TCP1 subunit 5	B4DX08
Prefoldin mediated transfer of substrate to CCT/TriC	22948	milk_pn12	Milk	Down	CCT5	chaperonin containing TCP1 subunit 5	B4DX08
Cooperation of PDCL (PhLP1) and TRiC/CCT in G-protein beta folding	22948	milk_pn12	Milk	Down	CCT5	chaperonin containing TCP1 subunit 5	B4DX08
Cooperation of Prefoldin and TriC/CCT in actin and tubulin folding	22948	milk_pn12	Milk	Down	CCT5	chaperonin containing TCP1 subunit 5	B4DX08
Association of TriC/CCT with target proteins during biosynthesis	22948	milk_pn12	Milk	Down	CCT5	chaperonin containing TCP1 subunit 5	B4DX08
RAB geranylgeranylation	23011	milk_pn12	Milk	Down	RAB21	RAB21, member RAS oncogene family	Q14466
AUF1 (hnRNP D0) binds and destabilizes mRNA	26986	milk_pn12	Milk	Down	PABPC1	poly(A) binding protein cytoplasmic 1	B3KT93
Interconversion of nucleotide di- and triphosphates	2745	milk_pn12	Milk	Down	GLRX	glutaredoxin	B2R4L2
Cooperation of PDCL (PhLP1) and TRiC/CCT in G-protein beta folding	2776	milk_pn12	Milk	Down	GNAQ	G protein subunit alpha q	A0A024R240
AUF1 (hnRNP D0) binds and destabilizes mRNA	3312	milk_pn12	Milk	Down	HSPA8	heat shock protein family A (Hsp70) member 8	P11142
AUF1 (hnRNP D0) binds and destabilizes mRNA	3315	milk_pn12	Milk	Down	HSPB1	heat shock protein family B (small) member 1	A0A6Q8PFK8
positive regulation of telomere maintenance via telomerase	3320	milk_pn12	Milk	Down	HSP90AA1	heat shock protein 90 alpha family class A member 1	P07900
RAB geranylgeranylation	376267	milk_pn12	Milk	Down	RAB15	RAB15, member RAS oncogene family	G3V196
Interconversion of nucleotide di- and triphosphates	4831	milk_pn12	Milk	Down	NME2	NME/NM23 nucleoside diphosphate kinase 2	A8MWA3
Interconversion of nucleotide di- and triphosphates	51727	milk_pn12	Milk	Down	CMPK1	cytidine/uridine monophosphate kinase 1	A0A494BXC7
RAB geranylgeranylation	51762	milk_pn12	Milk	Down	RAB8B	RAB8B, member RAS oncogene family	B4DMS1
AUF1 (hnRNP D0) binds and destabilizes mRNA	5692	milk_pn12	Milk	Down	PSMB4	proteasome 20S subunit beta 4	A0A140VK46
Cross-presentation of soluble exogenous antigens (endosomes)	5692	milk_pn12	Milk	Down	PSMB4	proteasome 20S subunit beta 4	A0A140VK46
Negative regulation of NOTCH4 signaling	5692	milk_pn12	Milk	Down	PSMB4	proteasome 20S subunit beta 4	A0A140VK46
Regulation of Apoptosis	5692	milk_pn12	Milk	Down	PSMB4	proteasome 20S subunit beta 4	A0A140VK46
Vpu mediated degradation of CD4	5692	milk_pn12	Milk	Down	PSMB4	proteasome 20S subunit beta 4	A0A140VK46
Regulation of activated PAK-2p34 by proteasome mediated degradation	5692	milk_pn12	Milk	Down	PSMB4	proteasome 20S subunit beta 4	A0A140VK46
Autodegradation of the E3 ubiquitin ligase COP1	5692	milk_pn12	Milk	Down	PSMB4	proteasome 20S subunit beta 4	A0A140VK46
Regulation of ornithine decarboxylase (ODC)	5692	milk_pn12	Milk	Down	PSMB4	proteasome 20S subunit beta 4	A0A140VK46
Proteasome assembly	5692	milk_pn12	Milk	Down	PSMB4	proteasome 20S subunit beta 4	A0A140VK46
Ubiquitin-dependent degradation of Cyclin D	5692	milk_pn12	Milk	Down	PSMB4	proteasome 20S subunit beta 4	A0A140VK46
Vif-mediated degradation of APOBEC3G	5692	milk_pn12	Milk	Down	PSMB4	proteasome 20S subunit beta 4	A0A140VK46
AUF1 (hnRNP D0) binds and destabilizes mRNA	5695	milk_pn12	Milk	Down	PSMB7	proteasome 20S subunit beta 7	B2RAQ9
Cross-presentation of soluble exogenous antigens (endosomes)	5695	milk_pn12	Milk	Down	PSMB7	proteasome 20S subunit beta 7	B2RAQ9
Negative regulation of NOTCH4 signaling	5695	milk_pn12	Milk	Down	PSMB7	proteasome 20S subunit beta 7	B2RAQ9
Regulation of Apoptosis	5695	milk_pn12	Milk	Down	PSMB7	proteasome 20S subunit beta 7	B2RAQ9
Vpu mediated degradation of CD4	5695	milk_pn12	Milk	Down	PSMB7	proteasome 20S subunit beta 7	B2RAQ9
Regulation of activated PAK-2p34 by proteasome mediated degradation	5695	milk_pn12	Milk	Down	PSMB7	proteasome 20S subunit beta 7	B2RAQ9
Autodegradation of the E3 ubiquitin ligase COP1	5695	milk_pn12	Milk	Down	PSMB7	proteasome 20S subunit beta 7	B2RAQ9
Regulation of ornithine decarboxylase (ODC)	5695	milk_pn12	Milk	Down	PSMB7	proteasome 20S subunit beta 7	B2RAQ9
Proteasome assembly	5695	milk_pn12	Milk	Down	PSMB7	proteasome 20S subunit beta 7	B2RAQ9
Ubiquitin-dependent degradation of Cyclin D	5695	milk_pn12	Milk	Down	PSMB7	proteasome 20S subunit beta 7	B2RAQ9
Vif-mediated degradation of APOBEC3G	5695	milk_pn12	Milk	Down	PSMB7	proteasome 20S subunit beta 7	B2RAQ9
AUF1 (hnRNP D0) binds and destabilizes mRNA	5702	milk_pn12	Milk	Down	PSMC3	proteasome 26S subunit, ATPase 3	A0A140VK42
Cross-presentation of soluble exogenous antigens (endosomes)	5702	milk_pn12	Milk	Down	PSMC3	proteasome 26S subunit, ATPase 3	A0A140VK42
Negative regulation of NOTCH4 signaling	5702	milk_pn12	Milk	Down	PSMC3	proteasome 26S subunit, ATPase 3	A0A140VK42
Regulation of Apoptosis	5702	milk_pn12	Milk	Down	PSMC3	proteasome 26S subunit, ATPase 3	A0A140VK42
Vpu mediated degradation of CD4	5702	milk_pn12	Milk	Down	PSMC3	proteasome 26S subunit, ATPase 3	A0A140VK42
Regulation of activated PAK-2p34 by proteasome mediated degradation	5702	milk_pn12	Milk	Down	PSMC3	proteasome 26S subunit, ATPase 3	A0A140VK42
Autodegradation of the E3 ubiquitin ligase COP1	5702	milk_pn12	Milk	Down	PSMC3	proteasome 26S subunit, ATPase 3	A0A140VK42
Regulation of ornithine decarboxylase (ODC)	5702	milk_pn12	Milk	Down	PSMC3	proteasome 26S subunit, ATPase 3	A0A140VK42
Proteasome assembly	5702	milk_pn12	Milk	Down	PSMC3	proteasome 26S subunit, ATPase 3	A0A140VK42
Ubiquitin-dependent degradation of Cyclin D	5702	milk_pn12	Milk	Down	PSMC3	proteasome 26S subunit, ATPase 3	A0A140VK42
Vif-mediated degradation of APOBEC3G	5702	milk_pn12	Milk	Down	PSMC3	proteasome 26S subunit, ATPase 3	A0A140VK42
AUF1 (hnRNP D0) binds and destabilizes mRNA	5709	milk_pn12	Milk	Down	PSMD3	proteasome 26S subunit, non-ATPase 3	B3KMW9
Cross-presentation of soluble exogenous antigens (endosomes)	5709	milk_pn12	Milk	Down	PSMD3	proteasome 26S subunit, non-ATPase 3	B3KMW9
Negative regulation of NOTCH4 signaling	5709	milk_pn12	Milk	Down	PSMD3	proteasome 26S subunit, non-ATPase 3	B3KMW9
Regulation of Apoptosis	5709	milk_pn12	Milk	Down	PSMD3	proteasome 26S subunit, non-ATPase 3	B3KMW9
Vpu mediated degradation of CD4	5709	milk_pn12	Milk	Down	PSMD3	proteasome 26S subunit, non-ATPase 3	B3KMW9
Regulation of activated PAK-2p34 by proteasome mediated degradation	5709	milk_pn12	Milk	Down	PSMD3	proteasome 26S subunit, non-ATPase 3	B3KMW9
Autodegradation of the E3 ubiquitin ligase COP1	5709	milk_pn12	Milk	Down	PSMD3	proteasome 26S subunit, non-ATPase 3	B3KMW9
Regulation of ornithine decarboxylase (ODC)	5709	milk_pn12	Milk	Down	PSMD3	proteasome 26S subunit, non-ATPase 3	B3KMW9
Proteasome assembly	5709	milk_pn12	Milk	Down	PSMD3	proteasome 26S subunit, non-ATPase 3	B3KMW9
Ubiquitin-dependent degradation of Cyclin D	5709	milk_pn12	Milk	Down	PSMD3	proteasome 26S subunit, non-ATPase 3	B3KMW9
Vif-mediated degradation of APOBEC3G	5709	milk_pn12	Milk	Down	PSMD3	proteasome 26S subunit, non-ATPase 3	B3KMW9
Proteasome assembly	5711	milk_pn12	Milk	Down	PSMD5	proteasome 26S subunit, non-ATPase 5	A8K4T6
Cross-presentation of soluble exogenous antigens (endosomes)	5721	milk_pn12	Milk	Down	PSME2	proteasome activator subunit 2	Q15129
Proteasome assembly	5721	milk_pn12	Milk	Down	PSME2	proteasome activator subunit 2	Q15129
RAB geranylgeranylation	5861	milk_pn12	Milk	Down	RAB1A	RAB1A, member RAS oncogene family	D6W5F3
RAB geranylgeranylation	5862	milk_pn12	Milk	Down	RAB2A	RAB2A, member RAS oncogene family	A0A0A1HAW1
RAB geranylgeranylation	5864	milk_pn12	Milk	Down	RAB3A	RAB3A, member RAS oncogene family	A0A024R7I7
RAB geranylgeranylation	5868	milk_pn12	Milk	Down	RAB5A	RAB5A, member RAS oncogene family	A0A0A1HAN9
RAB geranylgeranylation	5869	milk_pn12	Milk	Down	RAB5B	RAB5B, member RAS oncogene family	A8K982
RAB geranylgeranylation	5872	milk_pn12	Milk	Down	RAB13	RAB13, member RAS oncogene family	A0A087WWB9
Interconversion of nucleotide di- and triphosphates	7295	milk_pn12	Milk	Down	TXN	thioredoxin	P10599
Negative regulation of NOTCH4 signaling	7534	milk_pn12	Milk	Down	YWHAZ	tyrosine 3-monooxygenase/tryptophan 5-monooxygenase activation protein zeta	A8K1N0
RAB geranylgeranylation	81876	milk_pn12	Milk	Down	RAB1B	RAB1B, member RAS oncogene family	A8K7S1
SRP-dependent cotranslational protein targeting to membrane	10952	fecal_tri3	Mother fecal	Up	SEC61B	SEC61 translocon subunit beta	P38390
Porphyrin metabolism	1356	fecal_tri3	Mother fecal	Down	CP	ceruloplasmin	A5PL27
Gluconeogenesis	2023	fecal_tri3	Mother fecal	Down	ENO1	enolase 1	E2DRY6
Peptide chain elongation	23521	fecal_tri3	Mother fecal	Up	RPL13A	ribosomal protein L13a	Q0VGL3
Viral mRNA Translation	23521	fecal_tri3	Mother fecal	Up	RPL13A	ribosomal protein L13a	Q0VGL3
PELO:HBS1L and ABCE1 dissociate a ribosome on a non-stop mRNA	23521	fecal_tri3	Mother fecal	Up	RPL13A	ribosomal protein L13a	Q0VGL3
Eukaryotic Translation Elongation	23521	fecal_tri3	Mother fecal	Up	RPL13A	ribosomal protein L13a	Q0VGL3
Nonsense Mediated Decay (NMD) independent of the Exon Junction Complex (EJC)	23521	fecal_tri3	Mother fecal	Up	RPL13A	ribosomal protein L13a	Q0VGL3
Selenocysteine synthesis	23521	fecal_tri3	Mother fecal	Up	RPL13A	ribosomal protein L13a	Q0VGL3
Eukaryotic Translation Termination	23521	fecal_tri3	Mother fecal	Up	RPL13A	ribosomal protein L13a	Q0VGL3
ZNF598 and the Ribosome-associated Quality Trigger (RQT) complex dissociate a ribosome stalled on a no-go mRNA	23521	fecal_tri3	Mother fecal	Up	RPL13A	ribosomal protein L13a	Q0VGL3
Response of EIF2AK4 (GCN2) to amino acid deficiency	23521	fecal_tri3	Mother fecal	Up	RPL13A	ribosomal protein L13a	Q0VGL3
SRP-dependent cotranslational protein targeting to membrane	23521	fecal_tri3	Mother fecal	Up	RPL13A	ribosomal protein L13a	Q0VGL3
Formation of a pool of free 40S subunits	23521	fecal_tri3	Mother fecal	Up	RPL13A	ribosomal protein L13a	Q0VGL3
Selenoamino acid metabolism	23521	fecal_tri3	Mother fecal	Up	RPL13A	ribosomal protein L13a	Q0VGL3
L13a-mediated translational silencing of Ceruloplasmin expression	23521	fecal_tri3	Mother fecal	Up	RPL13A	ribosomal protein L13a	Q0VGL3
Nonsense-Mediated Decay (NMD)	23521	fecal_tri3	Mother fecal	Up	RPL13A	ribosomal protein L13a	Q0VGL3
Nonsense Mediated Decay (NMD) enhanced by the Exon Junction Complex (EJC)	23521	fecal_tri3	Mother fecal	Up	RPL13A	ribosomal protein L13a	Q0VGL3
GTP hydrolysis and joining of the 60S ribosomal subunit	23521	fecal_tri3	Mother fecal	Up	RPL13A	ribosomal protein L13a	Q0VGL3
Eukaryotic Translation Initiation	23521	fecal_tri3	Mother fecal	Up	RPL13A	ribosomal protein L13a	Q0VGL3
Cap-dependent Translation Initiation	23521	fecal_tri3	Mother fecal	Up	RPL13A	ribosomal protein L13a	Q0VGL3
Porphyrin metabolism	2495	fecal_tri3	Mother fecal	Down	FTH1	ferritin heavy chain 1	B3KNR5
Porphyrin metabolism	2512	fecal_tri3	Mother fecal	Down	FTL	ferritin light chain	A0A384MDR3
SARS-CoV-1-host interactions	2810	fecal_tri3	Mother fecal	Up	SFN	stratifin	P31947
Selenoamino acid metabolism	3376	fecal_tri3	Mother fecal	Up	IARS1	isoleucyl-tRNA synthetase 1	A0A804HL54
Peptide chain elongation	3921	fecal_tri3	Mother fecal	Up	RPSA	ribosomal protein SA	A0A0C4DG17
Viral mRNA Translation	3921	fecal_tri3	Mother fecal	Up	RPSA	ribosomal protein SA	A0A0C4DG17
PELO:HBS1L and ABCE1 dissociate a ribosome on a non-stop mRNA	3921	fecal_tri3	Mother fecal	Up	RPSA	ribosomal protein SA	A0A0C4DG17
Eukaryotic Translation Elongation	3921	fecal_tri3	Mother fecal	Up	RPSA	ribosomal protein SA	A0A0C4DG17
Nonsense Mediated Decay (NMD) independent of the Exon Junction Complex (EJC)	3921	fecal_tri3	Mother fecal	Up	RPSA	ribosomal protein SA	A0A0C4DG17
Selenocysteine synthesis	3921	fecal_tri3	Mother fecal	Up	RPSA	ribosomal protein SA	A0A0C4DG17
Eukaryotic Translation Termination	3921	fecal_tri3	Mother fecal	Up	RPSA	ribosomal protein SA	A0A0C4DG17
ZNF598 and the Ribosome-associated Quality Trigger (RQT) complex dissociate a ribosome stalled on a no-go mRNA	3921	fecal_tri3	Mother fecal	Up	RPSA	ribosomal protein SA	A0A0C4DG17
SARS-CoV-1 modulates host translation machinery	3921	fecal_tri3	Mother fecal	Up	RPSA	ribosomal protein SA	A0A0C4DG17
Response of EIF2AK4 (GCN2) to amino acid deficiency	3921	fecal_tri3	Mother fecal	Up	RPSA	ribosomal protein SA	A0A0C4DG17
SRP-dependent cotranslational protein targeting to membrane	3921	fecal_tri3	Mother fecal	Up	RPSA	ribosomal protein SA	A0A0C4DG17
Formation of a pool of free 40S subunits	3921	fecal_tri3	Mother fecal	Up	RPSA	ribosomal protein SA	A0A0C4DG17
Selenoamino acid metabolism	3921	fecal_tri3	Mother fecal	Up	RPSA	ribosomal protein SA	A0A0C4DG17
L13a-mediated translational silencing of Ceruloplasmin expression	3921	fecal_tri3	Mother fecal	Up	RPSA	ribosomal protein SA	A0A0C4DG17
Nonsense-Mediated Decay (NMD)	3921	fecal_tri3	Mother fecal	Up	RPSA	ribosomal protein SA	A0A0C4DG17
Nonsense Mediated Decay (NMD) enhanced by the Exon Junction Complex (EJC)	3921	fecal_tri3	Mother fecal	Up	RPSA	ribosomal protein SA	A0A0C4DG17
GTP hydrolysis and joining of the 60S ribosomal subunit	3921	fecal_tri3	Mother fecal	Up	RPSA	ribosomal protein SA	A0A0C4DG17
Eukaryotic Translation Initiation	3921	fecal_tri3	Mother fecal	Up	RPSA	ribosomal protein SA	A0A0C4DG17
Cap-dependent Translation Initiation	3921	fecal_tri3	Mother fecal	Up	RPSA	ribosomal protein SA	A0A0C4DG17
SARS-CoV-1-host interactions	3921	fecal_tri3	Mother fecal	Up	RPSA	ribosomal protein SA	A0A0C4DG17
Peptide chain elongation	4736	fecal_tri3	Mother fecal	Up	RPL10A	ribosomal protein L10a	B2R801
Viral mRNA Translation	4736	fecal_tri3	Mother fecal	Up	RPL10A	ribosomal protein L10a	B2R801
PELO:HBS1L and ABCE1 dissociate a ribosome on a non-stop mRNA	4736	fecal_tri3	Mother fecal	Up	RPL10A	ribosomal protein L10a	B2R801
Eukaryotic Translation Elongation	4736	fecal_tri3	Mother fecal	Up	RPL10A	ribosomal protein L10a	B2R801
Nonsense Mediated Decay (NMD) independent of the Exon Junction Complex (EJC)	4736	fecal_tri3	Mother fecal	Up	RPL10A	ribosomal protein L10a	B2R801
Selenocysteine synthesis	4736	fecal_tri3	Mother fecal	Up	RPL10A	ribosomal protein L10a	B2R801
Eukaryotic Translation Termination	4736	fecal_tri3	Mother fecal	Up	RPL10A	ribosomal protein L10a	B2R801
ZNF598 and the Ribosome-associated Quality Trigger (RQT) complex dissociate a ribosome stalled on a no-go mRNA	4736	fecal_tri3	Mother fecal	Up	RPL10A	ribosomal protein L10a	B2R801
Response of EIF2AK4 (GCN2) to amino acid deficiency	4736	fecal_tri3	Mother fecal	Up	RPL10A	ribosomal protein L10a	B2R801
SRP-dependent cotranslational protein targeting to membrane	4736	fecal_tri3	Mother fecal	Up	RPL10A	ribosomal protein L10a	B2R801
Formation of a pool of free 40S subunits	4736	fecal_tri3	Mother fecal	Up	RPL10A	ribosomal protein L10a	B2R801
Selenoamino acid metabolism	4736	fecal_tri3	Mother fecal	Up	RPL10A	ribosomal protein L10a	B2R801
L13a-mediated translational silencing of Ceruloplasmin expression	4736	fecal_tri3	Mother fecal	Up	RPL10A	ribosomal protein L10a	B2R801
Nonsense-Mediated Decay (NMD)	4736	fecal_tri3	Mother fecal	Up	RPL10A	ribosomal protein L10a	B2R801
Nonsense Mediated Decay (NMD) enhanced by the Exon Junction Complex (EJC)	4736	fecal_tri3	Mother fecal	Up	RPL10A	ribosomal protein L10a	B2R801
GTP hydrolysis and joining of the 60S ribosomal subunit	4736	fecal_tri3	Mother fecal	Up	RPL10A	ribosomal protein L10a	B2R801
Eukaryotic Translation Initiation	4736	fecal_tri3	Mother fecal	Up	RPL10A	ribosomal protein L10a	B2R801
Cap-dependent Translation Initiation	4736	fecal_tri3	Mother fecal	Up	RPL10A	ribosomal protein L10a	B2R801
Gluconeogenesis	5223	fecal_tri3	Mother fecal	Down	PGAM1	phosphoglycerate mutase 1	B4DKL5
Gluconeogenesis	5224	fecal_tri3	Mother fecal	Down	PGAM2	phosphoglycerate mutase 2	P15259
Antigen processing: Ub, ATP-independent proteasomal degradation	5685	fecal_tri3	Mother fecal	Down	PSMA4	proteasome 20S subunit alpha 4	D3DW86
Regulation of Apoptosis	5685	fecal_tri3	Mother fecal	Down	PSMA4	proteasome 20S subunit alpha 4	D3DW86
Vpu mediated degradation of CD4	5685	fecal_tri3	Mother fecal	Down	PSMA4	proteasome 20S subunit alpha 4	D3DW86
Regulation of activated PAK-2p34 by proteasome mediated degradation	5685	fecal_tri3	Mother fecal	Down	PSMA4	proteasome 20S subunit alpha 4	D3DW86
Autodegradation of the E3 ubiquitin ligase COP1	5685	fecal_tri3	Mother fecal	Down	PSMA4	proteasome 20S subunit alpha 4	D3DW86
Regulation of ornithine decarboxylase (ODC)	5685	fecal_tri3	Mother fecal	Down	PSMA4	proteasome 20S subunit alpha 4	D3DW86
Ubiquitin-dependent degradation of Cyclin D	5685	fecal_tri3	Mother fecal	Down	PSMA4	proteasome 20S subunit alpha 4	D3DW86
Vif-mediated degradation of APOBEC3G	5685	fecal_tri3	Mother fecal	Down	PSMA4	proteasome 20S subunit alpha 4	D3DW86
GSK3B and BTRC:CUL1-mediated-degradation of NFE2L2	5685	fecal_tri3	Mother fecal	Down	PSMA4	proteasome 20S subunit alpha 4	D3DW86
Proteasome	5685	fecal_tri3	Mother fecal	Down	PSMA4	proteasome 20S subunit alpha 4	D3DW86
Cross-presentation of soluble exogenous antigens (endosomes)	5685	fecal_tri3	Mother fecal	Down	PSMA4	proteasome 20S subunit alpha 4	D3DW86
SCF-beta-TrCP mediated degradation of Emi1	5685	fecal_tri3	Mother fecal	Down	PSMA4	proteasome 20S subunit alpha 4	D3DW86
Degradation of AXIN	5685	fecal_tri3	Mother fecal	Down	PSMA4	proteasome 20S subunit alpha 4	D3DW86
Degradation of GLI1 by the proteasome	5685	fecal_tri3	Mother fecal	Down	PSMA4	proteasome 20S subunit alpha 4	D3DW86
GSK3B-mediated proteasomal degradation of PD-L1(CD274)	5685	fecal_tri3	Mother fecal	Down	PSMA4	proteasome 20S subunit alpha 4	D3DW86
Regulation of CDH1 Function	5685	fecal_tri3	Mother fecal	Down	PSMA4	proteasome 20S subunit alpha 4	D3DW86
Degradation of GLI2 by the proteasome	5685	fecal_tri3	Mother fecal	Down	PSMA4	proteasome 20S subunit alpha 4	D3DW86
GLI3 is processed to GLI3R by the proteasome	5685	fecal_tri3	Mother fecal	Down	PSMA4	proteasome 20S subunit alpha 4	D3DW86
Antigen processing: Ub, ATP-independent proteasomal degradation	5687	fecal_tri3	Mother fecal	Down	PSMA6	proteasome 20S subunit alpha 6	P60900
Regulation of Apoptosis	5687	fecal_tri3	Mother fecal	Down	PSMA6	proteasome 20S subunit alpha 6	P60900
Vpu mediated degradation of CD4	5687	fecal_tri3	Mother fecal	Down	PSMA6	proteasome 20S subunit alpha 6	P60900
Regulation of activated PAK-2p34 by proteasome mediated degradation	5687	fecal_tri3	Mother fecal	Down	PSMA6	proteasome 20S subunit alpha 6	P60900
Autodegradation of the E3 ubiquitin ligase COP1	5687	fecal_tri3	Mother fecal	Down	PSMA6	proteasome 20S subunit alpha 6	P60900
Regulation of ornithine decarboxylase (ODC)	5687	fecal_tri3	Mother fecal	Down	PSMA6	proteasome 20S subunit alpha 6	P60900
Ubiquitin-dependent degradation of Cyclin D	5687	fecal_tri3	Mother fecal	Down	PSMA6	proteasome 20S subunit alpha 6	P60900
Vif-mediated degradation of APOBEC3G	5687	fecal_tri3	Mother fecal	Down	PSMA6	proteasome 20S subunit alpha 6	P60900
GSK3B and BTRC:CUL1-mediated-degradation of NFE2L2	5687	fecal_tri3	Mother fecal	Down	PSMA6	proteasome 20S subunit alpha 6	P60900
Proteasome	5687	fecal_tri3	Mother fecal	Down	PSMA6	proteasome 20S subunit alpha 6	P60900
Cross-presentation of soluble exogenous antigens (endosomes)	5687	fecal_tri3	Mother fecal	Down	PSMA6	proteasome 20S subunit alpha 6	P60900
SCF-beta-TrCP mediated degradation of Emi1	5687	fecal_tri3	Mother fecal	Down	PSMA6	proteasome 20S subunit alpha 6	P60900
Degradation of AXIN	5687	fecal_tri3	Mother fecal	Down	PSMA6	proteasome 20S subunit alpha 6	P60900
Degradation of GLI1 by the proteasome	5687	fecal_tri3	Mother fecal	Down	PSMA6	proteasome 20S subunit alpha 6	P60900
GSK3B-mediated proteasomal degradation of PD-L1(CD274)	5687	fecal_tri3	Mother fecal	Down	PSMA6	proteasome 20S subunit alpha 6	P60900
Regulation of CDH1 Function	5687	fecal_tri3	Mother fecal	Down	PSMA6	proteasome 20S subunit alpha 6	P60900
Degradation of GLI2 by the proteasome	5687	fecal_tri3	Mother fecal	Down	PSMA6	proteasome 20S subunit alpha 6	P60900
GLI3 is processed to GLI3R by the proteasome	5687	fecal_tri3	Mother fecal	Down	PSMA6	proteasome 20S subunit alpha 6	P60900
Proteasome	5688	fecal_tri3	Mother fecal	Down	PSMA7	proteasome 20S subunit alpha 7	A0A0K0K1K4
Antigen processing: Ub, ATP-independent proteasomal degradation	5690	fecal_tri3	Mother fecal	Down	PSMB2	proteasome 20S subunit beta 2	B7Z478
Regulation of Apoptosis	5690	fecal_tri3	Mother fecal	Down	PSMB2	proteasome 20S subunit beta 2	B7Z478
Vpu mediated degradation of CD4	5690	fecal_tri3	Mother fecal	Down	PSMB2	proteasome 20S subunit beta 2	B7Z478
Regulation of activated PAK-2p34 by proteasome mediated degradation	5690	fecal_tri3	Mother fecal	Down	PSMB2	proteasome 20S subunit beta 2	B7Z478
Autodegradation of the E3 ubiquitin ligase COP1	5690	fecal_tri3	Mother fecal	Down	PSMB2	proteasome 20S subunit beta 2	B7Z478
Regulation of ornithine decarboxylase (ODC)	5690	fecal_tri3	Mother fecal	Down	PSMB2	proteasome 20S subunit beta 2	B7Z478
Ubiquitin-dependent degradation of Cyclin D	5690	fecal_tri3	Mother fecal	Down	PSMB2	proteasome 20S subunit beta 2	B7Z478
Vif-mediated degradation of APOBEC3G	5690	fecal_tri3	Mother fecal	Down	PSMB2	proteasome 20S subunit beta 2	B7Z478
GSK3B and BTRC:CUL1-mediated-degradation of NFE2L2	5690	fecal_tri3	Mother fecal	Down	PSMB2	proteasome 20S subunit beta 2	B7Z478
Proteasome	5690	fecal_tri3	Mother fecal	Down	PSMB2	proteasome 20S subunit beta 2	B7Z478
Cross-presentation of soluble exogenous antigens (endosomes)	5690	fecal_tri3	Mother fecal	Down	PSMB2	proteasome 20S subunit beta 2	B7Z478
SCF-beta-TrCP mediated degradation of Emi1	5690	fecal_tri3	Mother fecal	Down	PSMB2	proteasome 20S subunit beta 2	B7Z478
Degradation of AXIN	5690	fecal_tri3	Mother fecal	Down	PSMB2	proteasome 20S subunit beta 2	B7Z478
Degradation of GLI1 by the proteasome	5690	fecal_tri3	Mother fecal	Down	PSMB2	proteasome 20S subunit beta 2	B7Z478
GSK3B-mediated proteasomal degradation of PD-L1(CD274)	5690	fecal_tri3	Mother fecal	Down	PSMB2	proteasome 20S subunit beta 2	B7Z478
Regulation of CDH1 Function	5690	fecal_tri3	Mother fecal	Down	PSMB2	proteasome 20S subunit beta 2	B7Z478
Degradation of GLI2 by the proteasome	5690	fecal_tri3	Mother fecal	Down	PSMB2	proteasome 20S subunit beta 2	B7Z478
GLI3 is processed to GLI3R by the proteasome	5690	fecal_tri3	Mother fecal	Down	PSMB2	proteasome 20S subunit beta 2	B7Z478
Regulation of CDH1 Function	60	fecal_tri3	Mother fecal	Down	ACTB	actin beta	P02570
Peptide chain elongation	6134	fecal_tri3	Mother fecal	Up	RPL10	ribosomal protein L10	A6QRI9
Viral mRNA Translation	6134	fecal_tri3	Mother fecal	Up	RPL10	ribosomal protein L10	A6QRI9
PELO:HBS1L and ABCE1 dissociate a ribosome on a non-stop mRNA	6134	fecal_tri3	Mother fecal	Up	RPL10	ribosomal protein L10	A6QRI9
Eukaryotic Translation Elongation	6134	fecal_tri3	Mother fecal	Up	RPL10	ribosomal protein L10	A6QRI9
Nonsense Mediated Decay (NMD) independent of the Exon Junction Complex (EJC)	6134	fecal_tri3	Mother fecal	Up	RPL10	ribosomal protein L10	A6QRI9
Selenocysteine synthesis	6134	fecal_tri3	Mother fecal	Up	RPL10	ribosomal protein L10	A6QRI9
Eukaryotic Translation Termination	6134	fecal_tri3	Mother fecal	Up	RPL10	ribosomal protein L10	A6QRI9
ZNF598 and the Ribosome-associated Quality Trigger (RQT) complex dissociate a ribosome stalled on a no-go mRNA	6134	fecal_tri3	Mother fecal	Up	RPL10	ribosomal protein L10	A6QRI9
Response of EIF2AK4 (GCN2) to amino acid deficiency	6134	fecal_tri3	Mother fecal	Up	RPL10	ribosomal protein L10	A6QRI9
SRP-dependent cotranslational protein targeting to membrane	6134	fecal_tri3	Mother fecal	Up	RPL10	ribosomal protein L10	A6QRI9
Formation of a pool of free 40S subunits	6134	fecal_tri3	Mother fecal	Up	RPL10	ribosomal protein L10	A6QRI9
Selenoamino acid metabolism	6134	fecal_tri3	Mother fecal	Up	RPL10	ribosomal protein L10	A6QRI9
L13a-mediated translational silencing of Ceruloplasmin expression	6134	fecal_tri3	Mother fecal	Up	RPL10	ribosomal protein L10	A6QRI9
Nonsense-Mediated Decay (NMD)	6134	fecal_tri3	Mother fecal	Up	RPL10	ribosomal protein L10	A6QRI9
Nonsense Mediated Decay (NMD) enhanced by the Exon Junction Complex (EJC)	6134	fecal_tri3	Mother fecal	Up	RPL10	ribosomal protein L10	A6QRI9
GTP hydrolysis and joining of the 60S ribosomal subunit	6134	fecal_tri3	Mother fecal	Up	RPL10	ribosomal protein L10	A6QRI9
Eukaryotic Translation Initiation	6134	fecal_tri3	Mother fecal	Up	RPL10	ribosomal protein L10	A6QRI9
Cap-dependent Translation Initiation	6134	fecal_tri3	Mother fecal	Up	RPL10	ribosomal protein L10	A6QRI9
Peptide chain elongation	6141	fecal_tri3	Mother fecal	Up	RPL18	ribosomal protein L18	F8VWC5
Viral mRNA Translation	6141	fecal_tri3	Mother fecal	Up	RPL18	ribosomal protein L18	F8VWC5
PELO:HBS1L and ABCE1 dissociate a ribosome on a non-stop mRNA	6141	fecal_tri3	Mother fecal	Up	RPL18	ribosomal protein L18	F8VWC5
Eukaryotic Translation Elongation	6141	fecal_tri3	Mother fecal	Up	RPL18	ribosomal protein L18	F8VWC5
Nonsense Mediated Decay (NMD) independent of the Exon Junction Complex (EJC)	6141	fecal_tri3	Mother fecal	Up	RPL18	ribosomal protein L18	F8VWC5
Selenocysteine synthesis	6141	fecal_tri3	Mother fecal	Up	RPL18	ribosomal protein L18	F8VWC5
Eukaryotic Translation Termination	6141	fecal_tri3	Mother fecal	Up	RPL18	ribosomal protein L18	F8VWC5
ZNF598 and the Ribosome-associated Quality Trigger (RQT) complex dissociate a ribosome stalled on a no-go mRNA	6141	fecal_tri3	Mother fecal	Up	RPL18	ribosomal protein L18	F8VWC5
Response of EIF2AK4 (GCN2) to amino acid deficiency	6141	fecal_tri3	Mother fecal	Up	RPL18	ribosomal protein L18	F8VWC5
SRP-dependent cotranslational protein targeting to membrane	6141	fecal_tri3	Mother fecal	Up	RPL18	ribosomal protein L18	F8VWC5
Formation of a pool of free 40S subunits	6141	fecal_tri3	Mother fecal	Up	RPL18	ribosomal protein L18	F8VWC5
Selenoamino acid metabolism	6141	fecal_tri3	Mother fecal	Up	RPL18	ribosomal protein L18	F8VWC5
L13a-mediated translational silencing of Ceruloplasmin expression	6141	fecal_tri3	Mother fecal	Up	RPL18	ribosomal protein L18	F8VWC5
Nonsense-Mediated Decay (NMD)	6141	fecal_tri3	Mother fecal	Up	RPL18	ribosomal protein L18	F8VWC5
Nonsense Mediated Decay (NMD) enhanced by the Exon Junction Complex (EJC)	6141	fecal_tri3	Mother fecal	Up	RPL18	ribosomal protein L18	F8VWC5
GTP hydrolysis and joining of the 60S ribosomal subunit	6141	fecal_tri3	Mother fecal	Up	RPL18	ribosomal protein L18	F8VWC5
Eukaryotic Translation Initiation	6141	fecal_tri3	Mother fecal	Up	RPL18	ribosomal protein L18	F8VWC5
Cap-dependent Translation Initiation	6141	fecal_tri3	Mother fecal	Up	RPL18	ribosomal protein L18	F8VWC5
Peptide chain elongation	6156	fecal_tri3	Mother fecal	Up	RPL30	ribosomal protein L30	B2R591
Viral mRNA Translation	6156	fecal_tri3	Mother fecal	Up	RPL30	ribosomal protein L30	B2R591
PELO:HBS1L and ABCE1 dissociate a ribosome on a non-stop mRNA	6156	fecal_tri3	Mother fecal	Up	RPL30	ribosomal protein L30	B2R591
Eukaryotic Translation Elongation	6156	fecal_tri3	Mother fecal	Up	RPL30	ribosomal protein L30	B2R591
Nonsense Mediated Decay (NMD) independent of the Exon Junction Complex (EJC)	6156	fecal_tri3	Mother fecal	Up	RPL30	ribosomal protein L30	B2R591
Selenocysteine synthesis	6156	fecal_tri3	Mother fecal	Up	RPL30	ribosomal protein L30	B2R591
Eukaryotic Translation Termination	6156	fecal_tri3	Mother fecal	Up	RPL30	ribosomal protein L30	B2R591
ZNF598 and the Ribosome-associated Quality Trigger (RQT) complex dissociate a ribosome stalled on a no-go mRNA	6156	fecal_tri3	Mother fecal	Up	RPL30	ribosomal protein L30	B2R591
Response of EIF2AK4 (GCN2) to amino acid deficiency	6156	fecal_tri3	Mother fecal	Up	RPL30	ribosomal protein L30	B2R591
SRP-dependent cotranslational protein targeting to membrane	6156	fecal_tri3	Mother fecal	Up	RPL30	ribosomal protein L30	B2R591
Formation of a pool of free 40S subunits	6156	fecal_tri3	Mother fecal	Up	RPL30	ribosomal protein L30	B2R591
Selenoamino acid metabolism	6156	fecal_tri3	Mother fecal	Up	RPL30	ribosomal protein L30	B2R591
L13a-mediated translational silencing of Ceruloplasmin expression	6156	fecal_tri3	Mother fecal	Up	RPL30	ribosomal protein L30	B2R591
Nonsense-Mediated Decay (NMD)	6156	fecal_tri3	Mother fecal	Up	RPL30	ribosomal protein L30	B2R591
Nonsense Mediated Decay (NMD) enhanced by the Exon Junction Complex (EJC)	6156	fecal_tri3	Mother fecal	Up	RPL30	ribosomal protein L30	B2R591
GTP hydrolysis and joining of the 60S ribosomal subunit	6156	fecal_tri3	Mother fecal	Up	RPL30	ribosomal protein L30	B2R591
Eukaryotic Translation Initiation	6156	fecal_tri3	Mother fecal	Up	RPL30	ribosomal protein L30	B2R591
Cap-dependent Translation Initiation	6156	fecal_tri3	Mother fecal	Up	RPL30	ribosomal protein L30	B2R591
Peptide chain elongation	6193	fecal_tri3	Mother fecal	Up	RPS5	ribosomal protein S5	B2R4T2
Viral mRNA Translation	6193	fecal_tri3	Mother fecal	Up	RPS5	ribosomal protein S5	B2R4T2
PELO:HBS1L and ABCE1 dissociate a ribosome on a non-stop mRNA	6193	fecal_tri3	Mother fecal	Up	RPS5	ribosomal protein S5	B2R4T2
Eukaryotic Translation Elongation	6193	fecal_tri3	Mother fecal	Up	RPS5	ribosomal protein S5	B2R4T2
Nonsense Mediated Decay (NMD) independent of the Exon Junction Complex (EJC)	6193	fecal_tri3	Mother fecal	Up	RPS5	ribosomal protein S5	B2R4T2
Selenocysteine synthesis	6193	fecal_tri3	Mother fecal	Up	RPS5	ribosomal protein S5	B2R4T2
Eukaryotic Translation Termination	6193	fecal_tri3	Mother fecal	Up	RPS5	ribosomal protein S5	B2R4T2
ZNF598 and the Ribosome-associated Quality Trigger (RQT) complex dissociate a ribosome stalled on a no-go mRNA	6193	fecal_tri3	Mother fecal	Up	RPS5	ribosomal protein S5	B2R4T2
SARS-CoV-1 modulates host translation machinery	6193	fecal_tri3	Mother fecal	Up	RPS5	ribosomal protein S5	B2R4T2
Response of EIF2AK4 (GCN2) to amino acid deficiency	6193	fecal_tri3	Mother fecal	Up	RPS5	ribosomal protein S5	B2R4T2
SRP-dependent cotranslational protein targeting to membrane	6193	fecal_tri3	Mother fecal	Up	RPS5	ribosomal protein S5	B2R4T2
Formation of a pool of free 40S subunits	6193	fecal_tri3	Mother fecal	Up	RPS5	ribosomal protein S5	B2R4T2
Selenoamino acid metabolism	6193	fecal_tri3	Mother fecal	Up	RPS5	ribosomal protein S5	B2R4T2
L13a-mediated translational silencing of Ceruloplasmin expression	6193	fecal_tri3	Mother fecal	Up	RPS5	ribosomal protein S5	B2R4T2
Nonsense-Mediated Decay (NMD)	6193	fecal_tri3	Mother fecal	Up	RPS5	ribosomal protein S5	B2R4T2
Nonsense Mediated Decay (NMD) enhanced by the Exon Junction Complex (EJC)	6193	fecal_tri3	Mother fecal	Up	RPS5	ribosomal protein S5	B2R4T2
GTP hydrolysis and joining of the 60S ribosomal subunit	6193	fecal_tri3	Mother fecal	Up	RPS5	ribosomal protein S5	B2R4T2
Eukaryotic Translation Initiation	6193	fecal_tri3	Mother fecal	Up	RPS5	ribosomal protein S5	B2R4T2
Cap-dependent Translation Initiation	6193	fecal_tri3	Mother fecal	Up	RPS5	ribosomal protein S5	B2R4T2
SARS-CoV-1-host interactions	6193	fecal_tri3	Mother fecal	Up	RPS5	ribosomal protein S5	B2R4T2
Peptide chain elongation	6208	fecal_tri3	Mother fecal	Up	RPS14	ribosomal protein S14	A0A2R8Y811
Viral mRNA Translation	6208	fecal_tri3	Mother fecal	Up	RPS14	ribosomal protein S14	A0A2R8Y811
PELO:HBS1L and ABCE1 dissociate a ribosome on a non-stop mRNA	6208	fecal_tri3	Mother fecal	Up	RPS14	ribosomal protein S14	A0A2R8Y811
Eukaryotic Translation Elongation	6208	fecal_tri3	Mother fecal	Up	RPS14	ribosomal protein S14	A0A2R8Y811
Nonsense Mediated Decay (NMD) independent of the Exon Junction Complex (EJC)	6208	fecal_tri3	Mother fecal	Up	RPS14	ribosomal protein S14	A0A2R8Y811
Selenocysteine synthesis	6208	fecal_tri3	Mother fecal	Up	RPS14	ribosomal protein S14	A0A2R8Y811
Eukaryotic Translation Termination	6208	fecal_tri3	Mother fecal	Up	RPS14	ribosomal protein S14	A0A2R8Y811
ZNF598 and the Ribosome-associated Quality Trigger (RQT) complex dissociate a ribosome stalled on a no-go mRNA	6208	fecal_tri3	Mother fecal	Up	RPS14	ribosomal protein S14	A0A2R8Y811
SARS-CoV-1 modulates host translation machinery	6208	fecal_tri3	Mother fecal	Up	RPS14	ribosomal protein S14	A0A2R8Y811
Response of EIF2AK4 (GCN2) to amino acid deficiency	6208	fecal_tri3	Mother fecal	Up	RPS14	ribosomal protein S14	A0A2R8Y811
SRP-dependent cotranslational protein targeting to membrane	6208	fecal_tri3	Mother fecal	Up	RPS14	ribosomal protein S14	A0A2R8Y811
Formation of a pool of free 40S subunits	6208	fecal_tri3	Mother fecal	Up	RPS14	ribosomal protein S14	A0A2R8Y811
Selenoamino acid metabolism	6208	fecal_tri3	Mother fecal	Up	RPS14	ribosomal protein S14	A0A2R8Y811
L13a-mediated translational silencing of Ceruloplasmin expression	6208	fecal_tri3	Mother fecal	Up	RPS14	ribosomal protein S14	A0A2R8Y811
Nonsense-Mediated Decay (NMD)	6208	fecal_tri3	Mother fecal	Up	RPS14	ribosomal protein S14	A0A2R8Y811
Nonsense Mediated Decay (NMD) enhanced by the Exon Junction Complex (EJC)	6208	fecal_tri3	Mother fecal	Up	RPS14	ribosomal protein S14	A0A2R8Y811
GTP hydrolysis and joining of the 60S ribosomal subunit	6208	fecal_tri3	Mother fecal	Up	RPS14	ribosomal protein S14	A0A2R8Y811
Eukaryotic Translation Initiation	6208	fecal_tri3	Mother fecal	Up	RPS14	ribosomal protein S14	A0A2R8Y811
Cap-dependent Translation Initiation	6208	fecal_tri3	Mother fecal	Up	RPS14	ribosomal protein S14	A0A2R8Y811
SARS-CoV-1-host interactions	6208	fecal_tri3	Mother fecal	Up	RPS14	ribosomal protein S14	A0A2R8Y811
SARS-CoV-1-host interactions	7532	fecal_tri3	Mother fecal	Up	YWHAG	tyrosine 3-monooxygenase/tryptophan 5-monooxygenase activation protein gamma	B3KNB4
Porphyrin metabolism	79799	fecal_tri3	Mother fecal	Down	UGT2A3	UDP glucuronosyltransferase family 2 member A3	Q6UWM9
