# Supplementary material
Source: Research Square preprint supplement (doi:10.21203/rs.3.rs-10290866/v1)
Supplement: Supplementary file 2 [file 1ed37ba13eb079675a698a7e.xlsx]

## Sheet: Description
	Inter-omic correlation network of multi-omic mediators associated with prenatal balanced energy–protein (BEP) supplementation and infant growth.
	This table summarizes significant pairwise correlations among molecular mediators identified in the mediation analyses. The network was constructed using robust inter-omic and intra-omic correlations retained for visualization and network analysis.
from:	Source mediator (node) in the correlation network.
to:	Target mediator (node) in the correlation network.
rho:	Spearman’s rank correlation coefficient between the two mediators.
q:	False discovery rate (FDR)-adjusted P value for the correlation.
n_timepoints:	Number of independent time point-specific datasets in which the correlation was observed.

## Sheet: correlation
from	to	rho	q	n_timepoints
milk::TG.16.0_40.7._pn12	milk::TG.22.6_34.1._pn12	0.975901	0	1
prot_dep::P51812_pn12	prot_dep::Q8IW92_pn12	0.923744	0	1
metab_milk::rLC_neg_mtb_1846872_1421	metab_milk::rLC_neg_mtb_1846883_1421	0.919296	0	1
metab_milk::rLC_neg_mtb_6361405_pn12	metab_milk::rLC_neg_mtb_6673225_pn12	0.869979	0	1
metab_infant::vam_1003974_pn12	metab_infant::vam_1009043_pn12	0.867995	0	1
metab_milk::rLC_neg_mtb_6704225_pn12	metab_milk::rLC_neg_mtb_6790060_pn12	0.863008	0	1
metab_milk::rLC_pos_mtb_7258182_pn12	metab_milk::rLC_pos_mtb_9970005_pn12	0.860081	0	1
metab_infant::vam_1003974_pn12	metab_infant::vam_1007892_pn12	0.85973	0	1
metab_infant::vam_1007892_pn12	metab_infant::vam_1009043_pn12	0.851719	0	1
metab_milk::rLC_pos_mtb_1209516_1421	metab_milk::rLC_pos_mtb_1554380_1421	0.850674	0	1
metab_milk::rLC_pos_mtb_10007784_pn12	metab_milk::rLC_pos_mtb_9970005_pn12	0.850571	0	1
metab_milk::rLC_neg_mtb_6333558_pn12	metab_milk::rLC_neg_mtb_6704225_pn12	0.838238	0	1
milk::p.Cresol.SO4_1421	metab_milk::rLC_neg_mtb_1411143_1421	0.834695	0	1
milk::X2.FL_pn12	metab_milk::rLC_pos_mtb_1209516_1421	0.828971	0	1
metab_milk::rLC_neg_mtb_6333558_pn12	metab_milk::rLC_neg_mtb_6790060_pn12	0.823885	0	1
milk::X2.FL_pn12	metab_milk::rLC_neg_mtb_1620620_pn34	0.812343	0	1
milk::TG.16.0_40.7._pn12	milk::TG.16.1_34.1._pn12	0.806215	0	1
metab_milk::rLC_pos_mtb_10007784_pn12	metab_milk::rLC_pos_mtb_7258182_pn12	0.800901	0	1
metab_infant::vam_1003974_pn56	metab_infant::vam_1007848_pn56	0.797802	0	1
metab_milk::rLC_neg_mtb_6419699_pn12	metab_milk::rLC_neg_mtb_6704225_pn12	0.795406	0	1
metab_milk::rLC_neg_mtb_1620620_pn34	metab_milk::rLC_pos_mtb_1209516_1421	0.79461	0	1
metab_milk::rLC_neg_mtb_1685649_1421	metab_milk::rLC_neg_mtb_2094253_1421	0.788884	0	1
milk::X2.FL_pn12	metab_milk::rLC_pos_mtb_1554380_1421	0.783335	0	1
metab_vams_post::vam_1003974_pn56	metab_vams_post::vam_1009089_pn56	0.782471	0	1
metab_milk::rLC_neg_mtb_1620620_pn34	metab_milk::rLC_pos_mtb_1554380_1421	0.78147	0	1
milk::TG.16.1_34.1._pn12	milk::TG.22.6_34.1._pn12	0.777159	0	1
metab_milk::rLC_neg_mtb_6333558_pn12	metab_milk::rLC_neg_mtb_6419699_pn12	0.773462	0	1
milk::X2.FL_pn12	metab_milk::rLC_neg_mtb_1596675_pn12	0.760614	0	1
metab_milk::rLC_neg_mtb_1620620_pn34	metab_milk::rLC_neg_mtb_2197266_pn12	0.758987	0	1
metab_infant::vam_1023091_pn12	metab_infant::vam_2030923_pn12	0.758834	0	1
metab_infant::vam_1003974_pn56	metab_infant::vam_1009089_pn56	0.757404	0	1
metab_infant::vam_1005311_pn12	metab_infant::vam_1009321_pn12	0.753942	0	1
metab_milk::rLC_neg_mtb_2197266_pn12	metab_milk::rLC_pos_mtb_1209516_1421	0.747213	0	1
metab_vams_post::vam_1003974_pn56	metab_vams_post::vam_1007848_pn56	0.746453	0	1
metab_infant::vam_1006121_pn56	metab_infant::vam_1015826_pn56	0.746384	0	1
metab_milk::rLC_neg_mtb_1596675_pn12	metab_milk::rLC_neg_mtb_1620620_pn34	0.744749	0	1
metab_milk::rLC_neg_mtb_1620620_pn34	metab_milk::rLC_neg_mtb_1846872_1421	0.743271	0	1
milk::FAT_pn12	milk::TG.16.1_34.1._pn12	0.741645	0	1
metab_milk::rLC_pos_mtb_10040225_pn34	metab_milk::rLC_pos_mtb_7258182_pn34	0.739523	0	1
metab_infant::vam_1006527_pn12	metab_infant::vam_1023091_pn12	0.739153	0	1
metab_milk::rLC_neg_mtb_1620620_pn34	metab_milk::rLC_neg_mtb_1846883_1421	0.737823	0	1
milk::X2.FL_pn12	metab_milk::rLC_neg_mtb_2197266_pn12	0.736634	0	1
metab_milk::rLC_neg_mtb_6419699_pn12	metab_milk::rLC_neg_mtb_6790060_pn12	0.736335	0	1
metab_milk::rLC_neg_mtb_1620620_pn34	metab_milk::rLC_neg_mtb_1685649_1421	0.729525	0	1
metab_milk::rLC_neg_mtb_1846883_1421	metab_milk::rLC_pos_mtb_1554380_1421	0.726653	0	1
milk::X2.FL_pn12	metab_milk::rLC_neg_mtb_1846883_1421	0.725591	0	1
milk::FAT_pn12	milk::TG.16.0_40.7._pn12	0.721717	0	1
prot_dep::P55056_pn56	prot_naive::P55056_pn56	0.721354	0	1
metab_vams_post::vam_1006121_pn56	metab_vams_post::vam_1015826_pn56	0.720422	0	1
metab_infant::vam_1003974_pn56	metab_infant::vam_1004005_pn56	0.717039	0	1
prot_naive::A0A0A0MS14_pn12	prot_naive::Q9N2J8_pn12	0.716316	0	1
milk::X2.FL_pn12	metab_milk::rLC_neg_mtb_1846872_1421	0.714613	0	1
metab_milk::rLC_neg_mtb_1596675_pn12	metab_milk::rLC_neg_mtb_2197266_pn12	0.7124	0	1
metab_milk::rLC_neg_mtb_1846872_1421	metab_milk::rLC_pos_mtb_1554380_1421	0.709982	0	1
metab_milk::rLC_neg_mtb_1685649_1421	metab_milk::rLC_neg_mtb_1846883_1421	0.709159	0	1
metab_milk::rLC_neg_mtb_1596675_pn12	metab_milk::rLC_pos_mtb_1209516_1421	0.708919	0	1
metab_milk::rLC_neg_mtb_2197266_pn12	metab_milk::rLC_pos_mtb_1554380_1421	0.708733	0	1
metab_vams_post::vam_1003974_pn56	metab_vams_post::vam_1004005_pn56	0.708724	0	1
metab_milk::rLC_neg_mtb_1846883_1421	metab_milk::rLC_neg_mtb_2197266_pn12	0.707677	0	1
prot_naive::A0A0A0MS14_pn12	prot_naive::A0A0A0MT89_pn12	0.706908	0	1
metab_vams_post::vam_1011758_pn56	metab_vams_post::vam_2002382_pn56	0.706126	0	1
metab_infant::vam_1009085_pn34	metab_infant::vam_1016111_pn34	0.70612	0	1
metab_infant::vam_1005311_pn12	metab_infant::vam_1008665_pn12	0.701947	0	1
metab_milk::rLC_neg_mtb_1685649_1421	metab_milk::rLC_neg_mtb_1846872_1421	0.70107	0	1
metab_milk::rLC_neg_mtb_1846883_1421	metab_milk::rLC_pos_mtb_1209516_1421	0.698811	0	1
metab_milk::rLC_neg_mtb_1846872_1421	metab_milk::rLC_pos_mtb_1209516_1421	0.698402	0	1
metab_milk::rLC_neg_mtb_1846872_1421	metab_milk::rLC_neg_mtb_2197266_pn12	0.697242	0	1
metab_infant::vam_1011758_pn56	metab_infant::vam_2002382_pn56	0.695554	0	1
milk::X2.FL_pn12	metab_milk::rLC_neg_mtb_1685649_1421	0.686913	0	1
prot_dep::P51812_pn12	prot_dep::Q7Z398_pn12	0.684195	0	1
metab_milk::rLC_neg_mtb_1685649_1421	metab_milk::rLC_pos_mtb_1554380_1421	0.683745	0	1
metab_milk::rLC_neg_mtb_1596675_pn12	metab_milk::rLC_pos_mtb_1554380_1421	0.68325	0	1
metab_infant::vam_1006527_pn12	metab_infant::vam_2030923_pn12	0.68048	0	1
metab_milk::rLC_neg_mtb_1685649_1421	metab_milk::rLC_pos_mtb_1209516_1421	0.675263	0	1
prot_naive::A0A0A0MT89_pn12	prot_naive::Q9N2J8_pn12	0.670816	0	1
metab_vams_post::vam_1003974_pn56	metab_vams_post::vam_2011421_pn56	0.661786	0	1
milk::FAT_pn12	milk::TG.22.6_34.1._pn12	0.661256	0	1
metab_milk::rLC_neg_mtb_1353454_pn34	metab_milk::rLC_neg_mtb_1620620_pn34	0.660176	0	1
metab_infant::vam_1000105_pn12	metab_infant::vam_1003801_pn12	0.659444	0	1
metab_milk::rLC_neg_mtb_1787234_pn34	metab_milk::rLC_neg_mtb_2197266_pn12	0.65842	0	1
metab_milk::rLC_neg_mtb_6673225_pn12	metab_milk::rLC_neg_mtb_6790060_pn12	0.655751	0	1
metab_vams_post::vam_1005685_pn56	metab_infant::vam_1005685_pn56	0.652383	0	1
prot_naive::A0A0A0MS15_pn12	prot_naive::Q9N2J8_pn12	0.652004	0	1
milk::X2.FL_pn12	metab_milk::rLC_neg_mtb_1787234_pn34	0.648676	0	1
prot_dep::O94979_pn12	prot_dep::P13591_pn12	0.645052	0	1
prot_dep::Q7Z398_pn12	prot_dep::Q8IW92_pn12	0.644528	0	1
metab_milk::rLC_neg_mtb_1787234_pn34	metab_milk::rLC_pos_mtb_1209516_1421	0.64378	0	1
metab_milk::rLC_neg_mtb_1620620_pn34	metab_milk::rLC_neg_mtb_1787234_pn34	0.641062	0	1
metab_infant::vam_1004005_pn56	metab_infant::vam_1007848_pn56	0.637725	0	1
metab_infant::vam_1009043_pn12	metab_infant::vam_2011818_pn12	0.6375	0	1
metab_milk::rLC_neg_mtb_1596675_pn12	metab_milk::rLC_neg_mtb_1846883_1421	0.634624	0	1
metab_infant::vam_2000894_pn56	metab_infant::vam_2003571_pn56	0.634355	0	1
metab_milk::rLC_neg_mtb_1787234_pn34	metab_milk::rLC_pos_mtb_1554380_1421	0.634354	0	1
metab_infant::vam_1007848_pn56	metab_infant::vam_1009089_pn56	0.633568	0	1
metab_infant::vam_1003974_pn56	metab_infant::vam_2011421_pn56	0.631155	0	1
metab_infant::vam_1003974_pn12	metab_infant::vam_2011818_pn12	0.630326	0	1
prot_dep::P16070_pn56	prot_dep::Q96N11_pn56	0.630065	0	1
metab_infant::vam_1008665_pn12	metab_infant::vam_1009321_pn12	0.630019	0	1
metab_vams_post::vam_1015826_pn56	metab_vams_post::vam_2006570_pn56	0.628404	0	1
metab_infant::vam_1015826_pn56	metab_infant::vam_2011129_pn56	0.627824	0	1
metab_milk::rLC_neg_mtb_1596675_pn12	metab_milk::rLC_neg_mtb_1846872_1421	0.626877	0	1
metab_milk::rLC_neg_mtb_1620620_pn34	metab_milk::rLC_pos_mtb_1181693_pn34	0.626869	0	1
metab_vams_post::vam_1004005_pn56	metab_vams_post::vam_2011421_pn56	0.624324	0	1
metab_vams_post::vam_1004005_pn56	metab_vams_post::vam_1009089_pn56	0.623956	0	1
metab_milk::rLC_neg_mtb_6333558_pn12	metab_milk::rLC_neg_mtb_6673225_pn12	0.62225	0	1
metab_vams_post::vam_1007848_pn56	metab_vams_post::vam_1009089_pn56	0.620731	0	1
metab_infant::vam_1004005_pn56	metab_infant::vam_1009089_pn56	0.619275	0	1
metab_infant::vam_1007848_pn56	metab_infant::vam_2011421_pn56	0.615921	0	1
prot_dep::P13591_pn12	prot_dep::Q14126_pn12	0.615785	9.9399e-16	1
metab_milk::rLC_neg_mtb_1846872_1421	metab_milk::rLC_neg_mtb_2094253_1421	0.615	0	1
metab_infant::vam_2004073_pn12	metab_infant::vam_2004369_pn12	0.613586	0	1
metab_milk::rLC_neg_mtb_1620620_pn34	metab_milk::rLC_pos_mtb_1793772_1421	0.61309	0	1
metab_infant::vam_1009085_pn34	metab_infant::vam_1012943_pn34	0.612925	0	1
metab_milk::rLC_neg_mtb_1620620_pn34	metab_milk::rLC_neg_mtb_2094253_1421	0.611011	0	1
metab_vams_post::vam_1009089_pn56	metab_vams_post::vam_2011421_pn56	0.609353	0	1
metab_milk::rLC_neg_mtb_1846883_1421	metab_milk::rLC_neg_mtb_2094253_1421	0.606663	0	1
prot_dep::P13591_pn12	prot_naive::Q15428_pn12	0.60542	3.70822e-15	1
metab_infant::vam_1007892_pn12	metab_infant::vam_2011818_pn12	0.605045	0	1
metab_milk::rLC_neg_mtb_1596675_pn12	metab_milk::rLC_neg_mtb_1685649_1421	0.603947	0	1
metab_milk::rLC_pos_mtb_1554380_1421	metab_milk::rLC_pos_mtb_1793772_1421	0.603118	0	1
metab_vams_post::vam_2000894_pn56	metab_vams_post::vam_2003571_pn56	0.602589	0	1
metab_milk::rLC_neg_mtb_1353454_pn34	metab_milk::rLC_neg_mtb_2197266_pn12	0.600315	0	1
metab_infant::vam_1006121_pn56	metab_infant::vam_2011129_pn56	0.600299	0	1
prot_naive::A0A0A0MS14_pn12	prot_naive::A0A0A0MS15_pn12	0.600012	6.36088e-15	1
metab_infant::vam_1000105_pn12	metab_infant::vam_1000574_pn12	0.598714	0	1
metab_milk::rLC_pos_mtb_1181693_pn34	metab_milk::rLC_pos_mtb_1209516_1421	0.598631	0	1
metab_infant::vam_2006570_pn56	metab_infant::vam_2009731_pn56	0.597292	0	1
metab_milk::rLC_pos_mtb_1209516_1421	metab_milk::rLC_pos_mtb_1793772_1421	0.593404	0	1
metab_infant::vam_1015826_pn56	metab_infant::vam_2006570_pn56	0.591138	0	1
metab_infant::vam_1015826_pn56	metab_infant::vam_2009731_pn56	0.590221	0	1
prot_dep::P25311_pn56	prot_naive::P25311_pn56	0.588951	5.92388e-14	1
metab_infant::vam_2006570_pn56	metab_infant::vam_2011129_pn56	0.587672	0	1
metab_vams_post::vam_1006121_pn56	metab_vams_post::vam_2006570_pn56	0.587034	0	1
metab_milk::rLC_neg_mtb_1353454_pn34	metab_milk::rLC_neg_mtb_1596675_pn12	0.58662	0	1
metab_vams_post::vam_1007848_pn56	metab_vams_post::vam_2011421_pn56	0.584703	0	1
metab_milk::rLC_neg_mtb_1787234_pn34	metab_milk::rLC_neg_mtb_1846883_1421	0.584068	0	1
metab_milk::rLC_neg_mtb_1787234_pn34	metab_milk::rLC_neg_mtb_1846872_1421	0.58359	0	1
milk::X2.FL_pn12	metab_milk::rLC_pos_mtb_1793772_1421	0.582735	0	1
metab_milk::rLC_neg_mtb_1234544_pn34	metab_milk::rLC_neg_mtb_1620620_pn34	0.578369	0	1
metab_milk::rLC_neg_mtb_1846872_1421	metab_milk::rLC_pos_mtb_1793772_1421	0.576846	0	1
metab_infant::vam_1009043_pn12	metab_infant::vam_2010737_pn12	0.576223	0	1
metab_milk::rLC_neg_mtb_1353454_pn34	metab_milk::rLC_neg_mtb_1846883_1421	0.574704	0	1
metab_vams_post::vam_1004005_pn56	metab_vams_post::vam_1007848_pn56	0.574018	0	1
milk::X2.FL_pn12	metab_milk::rLC_neg_mtb_1353454_pn34	0.573086	0	1
metab_milk::rLC_neg_mtb_1685649_1421	metab_milk::rLC_pos_mtb_1793772_1421	0.572958	0	1
metab_milk::rLC_neg_mtb_1353454_pn34	metab_milk::rLC_neg_mtb_1846872_1421	0.572021	0	1
prot_naive::A0A0A0MT89_pn12	prot_naive::A0A0B4J1V2_pn12	0.570674	2.32917e-13	1
metab_vams_post::vam_1005685_pn56	metab_vams_post::vam_1024165_pn56	0.568319	0	1
metab_milk::rLC_neg_mtb_1685649_1421	metab_milk::rLC_neg_mtb_2197266_pn12	0.567496	0	1
metab_infant::vam_1012943_pn34	metab_infant::vam_1016111_pn34	0.567167	0	1
metab_infant::vam_1006121_pn56	metab_infant::vam_2009731_pn56	0.566081	0	1
metab_infant::vam_1022465_pn34	metab_infant::vam_1042620_pn34	0.566029	0	1
metab_milk::rLC_neg_mtb_1596675_pn12	metab_milk::rLC_pos_mtb_1181693_pn34	0.566005	0	1
metab_milk::rLC_neg_mtb_4313871_pn12	metab_milk::rLC_neg_mtb_4342415_1421	0.563238	0	1
milk::FAT_pn12	metab_milk::rLC_pos_mtb_4417692_pn12	0.562949	0	1
metab_milk::rLC_neg_mtb_1353454_pn34	metab_milk::rLC_pos_mtb_1554380_1421	0.561651	0	1
milk::X2.FL_pn12	metab_milk::rLC_neg_mtb_2094253_1421	0.560059	0	1
metab_milk::rLC_neg_mtb_1596675_pn12	metab_milk::rLC_neg_mtb_1787234_pn34	0.559742	0	1
metab_infant::vam_1004005_pn56	metab_infant::vam_2011421_pn56	0.555426	0	1
prot_naive::A0A0B4J1V2_pn12	prot_naive::Q9N2J8_pn12	0.554098	1.54628e-12	1
metab_milk::rLC_neg_mtb_1846883_1421	metab_milk::rLC_pos_mtb_1793772_1421	0.55375	0	1
prot_dep::Q7Z398_pn12	prot_naive::Q9N2J8_pn12	0.553259	1.69578e-12	1
metab_vams_post::vam_1006121_pn56	metab_vams_post::vam_1006711_pn56	0.552753	0	1
metab_milk::rLC_pos_mtb_4417692_pn12	metab_milk::rLC_pos_mtb_9970005_pn12	0.551515	0	1
metab_milk::rLC_neg_mtb_1353454_pn34	metab_milk::rLC_pos_mtb_1209516_1421	0.551365	0	1
metab_infant::vam_2025775_pn12	metab_infant::vam_2039878_pn12	0.551336	0	1
metab_infant::vam_1007892_pn12	metab_infant::vam_2010737_pn12	0.551101	0	1
metab_infant::vam_1006121_pn56	metab_infant::vam_2006570_pn56	0.545787	0	1
metab_vams_post::vam_1015826_pn56	metab_vams_post::vam_2011129_pn56	0.544066	0	1
prot_naive::A0A0A0MS15_pn12	prot_naive::A0A0A0MT89_pn12	0.542796	5.21354e-12	1
metab_vams_post::vam_1006121_pn56	metab_vams_post::vam_2011129_pn56	0.542314	0	1
milk::X2.FL_pn12	metab_milk::rLC_pos_mtb_1181693_pn34	0.541628	0	1
metab_milk::rLC_neg_mtb_1353273_1421	metab_milk::rLC_neg_mtb_1685649_1421	0.541582	0	1
metab_milk::rLC_neg_mtb_2094253_1421	metab_milk::rLC_pos_mtb_1554380_1421	0.54073	0	1
metab_milk::rLC_pos_mtb_1181693_pn34	metab_milk::rLC_pos_mtb_1554380_1421	0.539134	0	1
metab_milk::rLC_neg_mtb_1353273_1421	metab_milk::rLC_neg_mtb_2094253_1421	0.537707	0	1
metab_infant::vam_1009089_pn56	metab_infant::vam_2011421_pn56	0.53538	0	1
metab_vams_post::vam_2006570_pn56	metab_vams_post::vam_2009731_pn56	0.534097	0	1
metab_vams_post::vam_2006570_pn56	metab_vams_post::vam_2011129_pn56	0.533655	0	1
metab_milk::rLC_pos_mtb_5310734_pn12	metab_milk::rLC_pos_mtb_9970005_pn12	0.531591	0	1
metab_vams_post::vam_1015826_pn56	metab_vams_post::vam_2009731_pn56	0.531476	0	1
metab_infant::vam_1003974_pn12	metab_infant::vam_2010737_pn12	0.530534	0	1
prot_dep::P02743_pn56	prot_naive::P02743_pn56	0.528756	4.12859e-11	1
metab_milk::rLC_neg_mtb_2197266_pn12	metab_milk::rLC_pos_mtb_1181693_pn34	0.52838	0	1
metab_milk::rLC_neg_mtb_2471187_1421	metab_milk::rLC_pos_mtb_1209516_1421	0.5271	0	1
metab_milk::rLC_neg_mtb_1353454_pn34	metab_milk::rLC_neg_mtb_1787234_pn34	0.525746	0	1
metab_vams_post::vam_1006121_pn56	metab_vams_post::vam_2003571_pn56	0.524945	0	1
metab_infant::vam_2026897_pn12	metab_infant::vam_2039878_pn12	0.524866	0	1
metab_milk::rLC_neg_mtb_1234544_pn34	metab_milk::rLC_pos_mtb_1209516_1421	0.52457	0	1
metab_vams_post::vam_1006121_pn56	metab_vams_post::vam_2009731_pn56	0.523743	0	1
metab_milk::rLC_neg_mtb_1234544_pn34	metab_milk::rLC_neg_mtb_1353454_pn34	0.522793	0	1
metab_milk::rLC_neg_mtb_1868950_pn12	metab_milk::rLC_neg_mtb_2094253_1421	0.522346	0	1
prot_dep::P51812_pn12	prot_naive::Q9N2J8_pn12	0.522166	4.2041e-11	1
metab_milk::rLC_neg_mtb_1846872_1421	metab_milk::rLC_pos_mtb_1181693_pn34	0.521435	0	1
metab_infant::vam_1006121_pn56	metab_infant::vam_1006711_pn56	0.521147	0	1
metab_milk::rLC_neg_mtb_6361405_pn12	metab_milk::rLC_neg_mtb_6790060_pn12	0.521064	0	1
metab_milk::rLC_pos_mtb_4417692_pn12	metab_milk::rLC_pos_mtb_5310734_pn12	0.520767	0	1
metab_milk::rLC_neg_mtb_6673225_pn12	metab_milk::rLC_neg_mtb_6704225_pn12	0.520564	0	1
metab_milk::rLC_neg_mtb_1234544_pn34	metab_milk::rLC_neg_mtb_1846872_1421	0.520242	0	1
metab_milk::rLC_neg_mtb_2163642_1421	metab_milk::rLC_neg_mtb_2296565_1421	0.518985	0	1
metab_vams_post::vam_1006711_pn56	metab_vams_post::vam_1015826_pn56	0.516972	0	1
metab_milk::rLC_neg_mtb_1234544_pn34	metab_milk::rLC_neg_mtb_1846883_1421	0.514189	0	1
metab_milk::rLC_neg_mtb_1846883_1421	metab_milk::rLC_pos_mtb_1181693_pn34	0.513552	0	1
prot_naive::A0A0A0MS14_pn12	prot_naive::A0A0B4J1V2_pn12	0.512443	1.06117e-10	1
milk::FAT_pn12	metab_milk::rLC_pos_mtb_5080356_pn12	0.511609	0	1
metab_milk::rLC_neg_mtb_1234544_pn34	metab_milk::rLC_neg_mtb_2197266_pn12	0.511389	0	1
metab_milk::rLC_neg_mtb_1596675_pn12	metab_milk::rLC_neg_mtb_2094253_1421	0.510432	0	1
metab_infant::vam_1000105_pn12	metab_infant::vam_1004055_pn12	0.51008	0	1
prot_naive::P02743_pn56	prot_naive::P55058_pn56	0.509333	2.48174e-10	1
milk::Cer.d18.2.24.1._pn34	metab_milk::rLC_pos_mtb_4159213_pn34	0.508738	0	1
metab_vams_post::vam_1015826_pn56	metab_vams_post::vam_2003571_pn56	0.508457	0	1
metab_milk::rLC_pos_mtb_4813295_pn12	metab_milk::rLC_pos_mtb_9970005_pn12	0.507916	0	1
metab_infant::vam_1006711_pn56	metab_infant::vam_1015826_pn56	0.507727	0	1
metab_milk::rLC_neg_mtb_5770650_1421	metab_milk::rLC_neg_mtb_6247557_1421	0.507435	0	1
metab_milk::rLC_pos_mtb_5310734_pn12	metab_milk::rLC_pos_mtb_7258182_pn12	0.506862	0	1
prot_dep::Q7Z398_pn12	prot_naive::A0A0A0MS14_pn12	0.506849	1.76452e-10	1
milk::TG.16.0_40.7._pn12	metab_milk::rLC_pos_mtb_4417692_pn12	0.506725	0	1
milk::X2.FL_pn12	metab_milk::rLC_neg_mtb_1234544_pn34	0.506701	0	1
metab_milk::rLC_pos_mtb_10007784_pn12	metab_milk::rLC_pos_mtb_4417692_pn12	0.506033	0	1
metab_milk::rLC_neg_mtb_1685649_1421	metab_milk::rLC_pos_mtb_1181693_pn34	0.50561	0	1
metab_infant::vam_1023091_pn12	metab_infant::vam_1035179_pn12	0.50536	0	1
milk::FAT_pn12	metab_milk::rLC_pos_mtb_9970005_pn12	0.501646	0	1
metab_vams_post::vam_1007189_pn56	metab_vams_post::vam_2003571_pn56	0.501468	0	1
metab_infant::vam_1015826_pn56	metab_infant::vam_2003571_pn56	0.500892	0	1
milk::Cer.d18.2.24.1._pn34	metab_milk::rLC_pos_mtb_7258182_pn34	0.500484	0	1
metab_infant::vam_2009731_pn56	metab_infant::vam_2011129_pn56	0.500014	0	1
metab_infant::vam_1008679_pn34	metab_infant::vam_2008919_pn34	0.49855	0	1
metab_milk::rLC_neg_mtb_2094253_1421	metab_milk::rLC_pos_mtb_1209516_1421	0.497999	0	1
metab_infant::vam_2025775_pn12	metab_infant::vam_2026897_pn12	0.497736	0	1
metab_infant::vam_1022465_pn34	metab_infant::vam_1038175_pn34	0.496691	0	1
metab_milk::rLC_neg_mtb_1353454_pn34	metab_milk::rLC_neg_mtb_1685649_1421	0.496622	0	1
metab_infant::vam_1000574_pn12	metab_infant::vam_1003801_pn12	0.493436	0	1
metab_milk::rLC_neg_mtb_2149315_1421	metab_milk::rLC_pos_mtb_1582912_1421	0.493103	0	1
prot_dep::P51812_pn12	prot_naive::A0A0A0MS14_pn12	0.49208	6.60278e-10	1
metab_milk::rLC_neg_mtb_2094253_1421	metab_milk::rLC_pos_mtb_1793772_1421	0.491508	0	1
metab_infant::vam_1004554_pn12	metab_infant::vam_1023091_pn12	0.491145	0	1
metab_milk::rLC_neg_mtb_1787234_pn34	metab_milk::rLC_pos_mtb_1181693_pn34	0.490916	0	1
metab_infant::vam_2015571_pn34	metab_infant::vam_2016752_pn34	0.49044	0	1
metab_milk::rLC_neg_mtb_2471187_1421	metab_milk::rLC_pos_mtb_1554380_1421	0.490383	0	1
metab_infant::vam_1007266_pn34	metab_infant::vam_2008919_pn34	0.489668	0	1
metab_milk::rLC_neg_mtb_1353454_pn34	metab_milk::rLC_pos_mtb_1181693_pn34	0.488716	0	1
metab_vams_post::vam_2006570_pn56	metab_infant::vam_1006121_pn56	0.488025	0	1
metab_milk::rLC_neg_mtb_1596675_pn12	metab_milk::rLC_pos_mtb_1793772_1421	0.487499	0	1
metab_milk::rLC_pos_mtb_10007784_pn12	metab_milk::rLC_pos_mtb_5310734_pn12	0.487323	0	1
metab_milk::rLC_neg_mtb_1234544_pn34	metab_milk::rLC_pos_mtb_1554380_1421	0.486992	0	1
metab_infant::vam_1007266_pn34	metab_infant::vam_1008679_pn34	0.48698	0	1
milk::TG.16.1_34.1._pn12	metab_milk::rLC_pos_mtb_9970005_pn12	0.486296	0	1
metab_infant::vam_1006121_pn56	metab_infant::vam_2003571_pn56	0.486189	0	1
metab_milk::rLC_neg_mtb_1685649_1421	metab_milk::rLC_neg_mtb_1787234_pn34	0.486059	0	1
metab_infant::vam_1023091_pn12	metab_infant::vam_2039960_pn12	0.485951	0	1
metab_infant::vam_1033381_pn12	metab_infant::vam_2035876_pn12	0.484201	0	1
metab_milk::rLC_pos_mtb_10040225_pn34	metab_milk::rLC_pos_mtb_4159213_pn34	0.484006	0	1
metab_milk::rLC_neg_mtb_6333558_pn12	metab_milk::rLC_neg_mtb_6361405_pn12	0.483992	0	1
metab_milk::rLC_neg_mtb_2197266_pn12	metab_milk::rLC_pos_mtb_1793772_1421	0.483964	0	1
metab_vams_post::vam_1006711_pn56	metab_vams_post::vam_2009731_pn56	0.482814	0	1
prot_naive::P55058_pn56	prot_naive::Q08257_pn56	0.482662	2.4773e-09	1
metab_milk::rLC_neg_mtb_1234544_pn34	metab_milk::rLC_neg_mtb_1685649_1421	0.48144	0	1
metab_milk::rLC_pos_mtb_4417692_pn12	metab_milk::rLC_pos_mtb_7258182_pn12	0.480735	0	1
metab_milk::rLC_neg_mtb_1851694_1421	metab_milk::rLC_neg_mtb_5069646_1421	0.479771	0	1
metab_infant::vam_1003801_pn12	metab_infant::vam_1004055_pn12	0.479426	0	1
metab_infant::vam_1017889_pn12	metab_infant::vam_1028245_pn12	0.479133	0	1
metab_vams_post::vam_1006711_pn56	metab_vams_post::vam_2006570_pn56	0.478881	0	1
metab_milk::rLC_pos_mtb_4159213_pn34	metab_milk::rLC_pos_mtb_7258182_pn34	0.478666	0	1
metab_infant::vam_1006711_pn56	metab_infant::vam_2009731_pn56	0.478353	0	1
metab_infant::vam_1030068_pn12	metab_infant::vam_2039878_pn12	0.478342	0	1
metab_infant::vam_1041607_pn12	metab_infant::vam_2039878_pn12	0.476806	0	1
metab_milk::rLC_neg_mtb_1234544_pn34	metab_milk::rLC_neg_mtb_1787234_pn34	0.475999	0	1
metab_milk::rLC_neg_mtb_1620620_pn34	metab_milk::rLC_neg_mtb_2705898_pn34	0.475325	0	1
metab_infant::vam_1016289_pn34	metab_infant::vam_2019477_pn34	0.473687	0	1
metab_milk::rLC_neg_mtb_2094253_1421	metab_milk::rLC_neg_mtb_2197266_pn12	0.470579	9.9399e-16	1
metab_infant::vam_2010737_pn12	metab_infant::vam_2011818_pn12	0.470548	0	1
metab_infant::vam_2003218_pn34	metab_infant::vam_2008919_pn34	0.469933	0	1
metab_infant::vam_1035179_pn12	metab_infant::vam_2039960_pn12	0.469408	0	1
metab_infant::vam_1006711_pn56	metab_infant::vam_2006570_pn56	0.46926	9.9399e-16	1
metab_infant::vam_1007266_pn34	metab_infant::vam_2003218_pn34	0.468752	0	1
metab_infant::vam_1007266_pn34	metab_infant::vam_2019477_pn34	0.467897	0	1
milk::X2.FL_pn12	metab_milk::rLC_neg_mtb_2471187_1421	0.467806	1.91205e-15	1
metab_milk::rLC_neg_mtb_1234544_pn34	metab_milk::rLC_neg_mtb_1596675_pn12	0.466621	9.9399e-16	1
metab_milk::rLC_neg_mtb_1353454_pn34	metab_milk::rLC_neg_mtb_2094253_1421	0.466326	2.83851e-15	1
metab_infant::vam_2008919_pn34	metab_infant::vam_2019477_pn34	0.465682	0	1
metab_milk::rLC_neg_mtb_1620620_pn34	metab_milk::rLC_neg_mtb_2471187_1421	0.465511	3.70822e-15	1
metab_infant::vam_1005685_pn56	metab_infant::vam_1024165_pn56	0.465437	1.91205e-15	1
metab_infant::vam_1005311_pn12	metab_infant::vam_2033633_pn12	0.465256	0	1
metab_vams_post::vam_1006121_pn56	metab_vams_post::vam_2007285_pn56	0.465141	1.91205e-15	1
metab_vams_post::vam_1015826_pn56	metab_infant::vam_1015826_pn56	0.464351	1.91205e-15	1
metab_infant::vam_1006527_pn12	metab_infant::vam_2039960_pn12	0.464327	0	1
metab_vams_post::vam_1005685_pn56	metab_vams_post::vam_2005347_pn56	0.463887	1.91205e-15	1
metab_infant::vam_1006527_pn12	metab_infant::vam_1035179_pn12	0.463165	9.9399e-16	1
prot_dep::O94979_pn56	prot_dep::Q96N11_pn56	0.462379	1.22589e-08	1
prot_dep::P51812_pn12	prot_naive::A0A0A0MT89_pn12	0.462097	8.06711e-09	1
metab_vams_post::vam_1024165_pn56	metab_vams_post::vam_2005347_pn56	0.461672	2.83851e-15	1
milk::FAT_pn12	metab_milk::rLC_pos_mtb_10007784_pn12	0.460557	1.91205e-15	1
metab_plasma::rLC_pos_mtb_636920_tri3	prot_naive::Q9N2J8_pn12	0.460492	1.13461e-08	1
metab_infant::vam_1016111_pn34	metab_infant::vam_1042620_pn34	0.459564	1.91205e-15	1
prot_naive::A0A0A0MS15_pn12	prot_naive::A0A0B4J1V2_pn12	0.459199	1.00978e-08	1
milk::TG.16.1_34.1._pn12	metab_milk::rLC_pos_mtb_4417692_pn12	0.458897	9.9399e-16	1
prot_dep::P78527_pn12	prot_dep::Q14126_pn12	0.458774	1.04096e-08	1
prot_dep::O94979_pn12	prot_dep::Q14126_pn12	0.458573	1.05684e-08	1
milk::As_pn12	milk::TG.16.0_40.7._pn12	0.458023	3.70822e-15	1
metab_vams_post::vam_1015826_pn56	metab_vams_post::vam_2000894_pn56	0.45786	5.52512e-15	1
milk::As_pn12	milk::TG.22.6_34.1._pn12	0.457266	3.70822e-15	1
milk::TG.16.0_40.7._pn12	metab_milk::rLC_pos_mtb_9970005_pn12	0.456866	1.91205e-15	1
metab_infant::vam_2003571_pn56	metab_infant::vam_2011729_pn56	0.456833	6.36088e-15	1
milk::FAT_pn12	metab_milk::rLC_pos_mtb_7258182_pn12	0.456561	2.83851e-15	1
milk::TG.16.1_34.1._pn12	metab_milk::rLC_pos_mtb_5080356_pn12	0.456367	1.91205e-15	1
metab_infant::vam_1023091_pn12	metab_infant::vam_2041308_pn12	0.456299	1.91205e-15	1
metab_milk::rLC_neg_mtb_2068114_1421	metab_milk::rLC_pos_mtb_1582912_1421	0.455205	6.36088e-15	1
metab_milk::rLC_neg_mtb_1787234_pn34	metab_milk::rLC_neg_mtb_2705898_pn34	0.454681	4.61972e-15	1
metab_milk::rLC_pos_mtb_4813295_pn12	metab_milk::rLC_pos_mtb_7258182_pn12	0.454015	1.91205e-15	1
metab_infant::vam_1009321_pn12	metab_infant::vam_2039878_pn12	0.452923	3.70822e-15	1
metab_milk::rLC_neg_mtb_4741641_1421	metab_milk::rLC_neg_mtb_4800097_1421	0.452858	8.96858e-15	1
prot_dep::Q7Z398_pn12	prot_naive::A0A0A0MS15_pn12	0.452374	1.68822e-08	1
metab_infant::vam_1006711_pn56	metab_infant::vam_2011129_pn56	0.452026	1.32373e-14	1
prot_naive::P02743_pn56	prot_naive::Q08257_pn56	0.451492	2.75387e-08	1
milk::TG.16.1_34.1._pn12	metab_milk::rLC_pos_mtb_10007784_pn12	0.451295	3.70822e-15	1
metab_infant::vam_1044250_pn56	metab_infant::vam_2003571_pn56	0.449712	1.9291e-14	1
metab_milk::rLC_neg_mtb_1353454_pn34	metab_milk::rLC_pos_mtb_1793772_1421	0.448845	4.15121e-14	1
metab_infant::vam_2007339_pn34	metab_infant::vam_2008919_pn34	0.448536	8.96858e-15	1
metab_infant::vam_1017889_pn12	metab_infant::vam_1039807_pn12	0.448364	8.96858e-15	1
metab_vams_post::vam_2003571_pn56	metab_vams_post::vam_2011729_pn56	0.447722	2.27261e-14	1
metab_infant::vam_2016752_pn34	metab_infant::vam_2019477_pn34	0.446893	1.06926e-14	1
metab_vams_post::vam_1012102_pn56	metab_vams_post::vam_1024165_pn56	0.446733	2.61394e-14	1
prot_dep::Q14126_pn12	prot_naive::Q15428_pn12	0.44602	2.70719e-08	1
metab_infant::vam_1029523_pn56	metab_infant::vam_1044250_pn56	0.445974	3.25942e-14	1
metab_infant::vam_1023091_pn12	metab_infant::vam_2006912_pn12	0.444645	1.49543e-14	1
metab_milk::rLC_pos_mtb_4417692_pn12	metab_milk::rLC_pos_mtb_5080356_pn12	0.443925	1.06926e-14	1
metab_milk::rLC_neg_mtb_4741641_1421	metab_milk::rLC_neg_mtb_4802516_1421	0.443027	4.07904e-14	1
milk::TG.22.6_34.1._pn12	metab_milk::rLC_pos_mtb_4417692_pn12	0.442759	1.32373e-14	1
metab_infant::vam_2003218_pn34	metab_infant::vam_2019477_pn34	0.44044	2.85725e-14	1
metab_vams_post::vam_2006570_pn56	metab_vams_post::vam_2007285_pn56	0.440074	6.9454e-14	1
prot_dep::Q8IW92_pn12	prot_dep::Q8IZF2_pn12	0.439903	4.29207e-08	1
milk::Cer.d18.2.24.1._pn34	metab_milk::rLC_pos_mtb_10040225_pn34	0.43984	4.22293e-14	1
metab_infant::vam_1004554_pn12	metab_infant::vam_2030923_pn12	0.439804	3.10723e-14	1
metab_vams_post::vam_1006121_pn56	metab_vams_post::vam_2000894_pn56	0.439441	7.62089e-14	1
prot_dep::P51812_pn12	prot_dep::Q8IZF2_pn12	0.439384	4.45444e-08	1
metab_infant::vam_2032139_pn12	metab_infant::vam_2039960_pn12	0.439242	3.42031e-14	1
metab_infant::vam_1023138_pn12	metab_infant::vam_1039807_pn12	0.438157	4.07904e-14	1
metab_milk::rLC_pos_mtb_10007784_pn12	metab_milk::rLC_pos_mtb_4813295_pn12	0.438092	2.69255e-14	1
prot_dep::Q7Z398_pn12	prot_dep::Q8IZF2_pn12	0.437978	4.92822e-08	1
metab_milk::rLC_neg_mtb_1685649_1421	metab_milk::rLC_neg_mtb_2471187_1421	0.437806	8.63478e-14	1
metab_infant::vam_1023091_pn12	metab_infant::vam_1039807_pn12	0.435902	5.62423e-14	1
metab_infant::vam_1030068_pn12	metab_infant::vam_1041607_pn12	0.435253	6.15553e-14	1
metab_vams_post::vam_1015826_pn56	metab_infant::vam_1006121_pn56	0.434987	1.75213e-13	1
milk::TG.16.1_34.1._pn12	metab_milk::rLC_pos_mtb_7258182_pn12	0.434912	4.29422e-14	1
prot_dep::P51812_pn12	prot_naive::A0A0A0MS15_pn12	0.434632	6.31239e-08	1
metab_infant::vam_1008665_pn12	metab_infant::vam_2025775_pn12	0.434612	6.80045e-14	1
metab_vams_post::vam_2009731_pn56	metab_vams_post::vam_2011129_pn56	0.434523	1.53492e-13	1
prot_dep::O94979_pn12	prot_naive::Q15428_pn12	0.434219	6.49304e-08	1
metab_infant::vam_1000105_pn12	metab_infant::vam_2005992_pn12	0.433915	7.47926e-14	1
metab_plasma::rLC_pos_mtb_636920_tri3	prot_dep::Q7Z398_pn12	0.433899	8.04929e-08	1
metab_infant::vam_1035179_pn12	metab_infant::vam_2030923_pn12	0.432604	9.0154e-14	1
metab_infant::vam_2008919_pn34	metab_infant::vam_2016752_pn34	0.432509	9.06987e-14	1
metab_milk::rLC_neg_mtb_1787234_pn34	metab_milk::rLC_pos_mtb_1793772_1421	0.431596	4.71787e-13	1
milk::TG.22.6_34.1._pn12	metab_milk::rLC_pos_mtb_9970005_pn12	0.430825	7.84338e-14	1
metab_infant::vam_1009321_pn12	metab_infant::vam_2033633_pn12	0.430663	1.20308e-13	1
metab_milk::rLC_neg_mtb_1234544_pn34	metab_milk::rLC_pos_mtb_1181693_pn34	0.430575	1.62054e-13	1
metab_infant::vam_1004554_pn12	metab_infant::vam_1006527_pn12	0.430418	1.23981e-13	1
metab_infant::vam_1039807_pn12	metab_infant::vam_2030923_pn12	0.429899	1.34055e-13	1
metab_vams_post::vam_1021203_pn56	metab_vams_post::vam_2003571_pn56	0.429669	3.04561e-13	1
metab_vams_post::vam_2006570_pn56	metab_infant::vam_1015826_pn56	0.429521	3.81941e-13	1
metab_infant::vam_2008919_pn34	metab_infant::vam_2015571_pn34	0.429377	1.43238e-13	1
prot_dep::P16070_pn56	prot_dep::P25311_pn56	0.428982	1.37028e-07	1
metab_infant::vam_1038175_pn34	metab_infant::vam_1042620_pn34	0.428545	1.60941e-13	1
metab_vams_post::vam_1015826_pn56	metab_infant::vam_2011129_pn56	0.427561	4.99375e-13	1
metab_vams_post::vam_1006711_pn56	metab_vams_post::vam_2003571_pn56	0.427022	4.45125e-13	1
milk::TG.16.0_40.7._pn12	metab_milk::rLC_pos_mtb_10007784_pn12	0.427022	1.36067e-13	1
metab_vams_post::vam_2006570_pn56	metab_infant::vam_2006570_pn56	0.426525	5.76179e-13	1
metab_infant::vam_2030923_pn12	metab_infant::vam_2039960_pn12	0.426185	2.25063e-13	1
prot_dep::Q8IW92_pn12	prot_naive::Q9N2J8_pn12	0.425516	1.19237e-07	1
metab_milk::rLC_neg_mtb_2197266_pn12	metab_milk::rLC_neg_mtb_2471187_1421	0.424783	7.31754e-13	1
prot_dep::P13591_pn12	prot_dep::P78527_pn12	0.423292	1.38782e-07	1
metab_vams_post::vam_1029523_pn56	metab_vams_post::vam_1044250_pn56	0.423103	7.57912e-13	1
metab_infant::vam_2003571_pn56	metab_infant::vam_2009731_pn56	0.422888	8.57578e-13	1
metab_vams_post::vam_1015826_pn56	metab_vams_post::vam_2007285_pn56	0.422424	8.30423e-13	1
metab_infant::vam_1006527_pn12	metab_infant::vam_1038339_pn12	0.421241	4.59146e-13	1
metab_milk::rLC_pos_mtb_1181693_pn34	metab_milk::rLC_pos_mtb_1793772_1421	0.421226	1.8852e-12	1
metab_infant::vam_2007339_pn34	metab_infant::vam_2019477_pn34	0.421098	4.68526e-13	1
metab_infant::vam_1000574_pn12	metab_infant::vam_1004055_pn12	0.420829	4.84106e-13	1
metab_infant::vam_1004153_pn34	metab_infant::vam_1007266_pn34	0.420469	5.07038e-13	1
prot_dep::P04075_pn12	prot_dep::Q7Z398_pn12	0.419713	1.76482e-07	1
metab_infant::vam_1035179_pn12	metab_infant::vam_2030112_pn12	0.419289	5.99303e-13	1
metab_infant::vam_1016797_pn12	metab_infant::vam_1028245_pn12	0.418369	6.83488e-13	1
metab_infant::vam_1023091_pn12	metab_infant::vam_1023138_pn12	0.418265	6.92059e-13	1
prot_dep::P51812_pn12	prot_naive::A0A0B4J1V2_pn12	0.417478	2.05254e-07	1
metab_milk::rLC_neg_mtb_1353273_1421	metab_milk::rLC_neg_mtb_1846883_1421	0.417162	1.53249e-12	1
metab_infant::vam_1007266_pn34	metab_infant::vam_1016289_pn34	0.41616	9.21934e-13	1
metab_infant::vam_1008679_pn34	metab_infant::vam_2003218_pn34	0.415972	9.4505e-13	1
metab_vams_post::vam_2007285_pn56	metab_vams_post::vam_2011129_pn56	0.415029	2.22354e-12	1
metab_infant::vam_2003218_pn34	metab_infant::vam_2016752_pn34	0.415016	1.07809e-12	1
metab_vams_post::vam_1006121_pn56	metab_infant::vam_1015826_pn56	0.41496	2.70839e-12	1
metab_infant::vam_1041607_pn12	metab_infant::vam_2041308_pn12	0.414958	1.08395e-12	1
metab_milk::rLC_pos_mtb_5080356_pn12	metab_milk::rLC_pos_mtb_9970005_pn12	0.414896	7.58833e-13	1
metab_vams_post::vam_1006121_pn56	metab_infant::vam_1006121_pn56	0.414697	2.80166e-12	1
metab_vams_post::vam_1000749_pn56	metab_vams_post::vam_1012015_pn56	0.414553	2.37052e-12	1
metab_infant::vam_1008665_pn12	metab_infant::vam_2039878_pn12	0.413994	1.24082e-12	1
metab_milk::rLC_neg_mtb_1787234_pn34	metab_milk::rLC_neg_mtb_2094253_1421	0.413687	4.99452e-12	1
metab_infant::vam_1016289_pn34	metab_infant::vam_2008919_pn34	0.413658	1.29883e-12	1
prot_dep::Q7Z398_pn12	prot_naive::A0A0A0MT89_pn12	0.413399	2.7019e-07	1
metab_infant::vam_2012513_pn34	metab_infant::vam_2015571_pn34	0.413382	1.34369e-12	1
metab_milk::rLC_pos_mtb_1756040_pn12	metab_milk::rLC_pos_mtb_1793772_1421	0.412872	3.53935e-12	1
metab_infant::vam_1015826_pn56	metab_infant::vam_2011729_pn56	0.412865	3.24527e-12	1
prot_dep::Q8IW92_pn12	prot_naive::A0A0A0MS14_pn12	0.412506	2.86669e-07	1
metab_milk::rLC_neg_mtb_1353273_1421	metab_milk::rLC_neg_mtb_1846872_1421	0.412349	2.90166e-12	1
metab_milk::rLC_neg_mtb_9569352_1421	metab_milk::rLC_pos_mtb_1582912_1421	0.411273	3.33469e-12	1
metab_plasma::rLC_pos_mtb_636920_tri3	prot_dep::P51812_pn12	0.41104	3.78236e-07	1
metab_infant::vam_2006912_pn12	metab_infant::vam_2028656_pn12	0.411025	1.84355e-12	1
metab_milk::rLC_neg_mtb_1851694_1421	metab_milk::rLC_neg_mtb_1851918_1421	0.410738	3.5638e-12	1
metab_infant::vam_1038339_pn12	metab_infant::vam_2033516_pn12	0.410675	1.92665e-12	1
metab_infant::vam_1006121_pn56	metab_infant::vam_2011729_pn56	0.410601	4.34105e-12	1
metab_milk::rLC_pos_mtb_4417692_pn12	metab_milk::rLC_pos_mtb_4813295_pn12	0.409465	1.58831e-12	1
metab_vams_post::vam_1006121_pn56	metab_vams_post::vam_2011729_pn56	0.408966	4.90549e-12	1
metab_vams_post::vam_1011758_pn56	metab_infant::vam_1011758_pn56	0.408716	6.0129e-12	1
metab_milk::rLC_neg_mtb_2094253_1421	metab_milk::rLC_pos_mtb_1181693_pn34	0.408078	1.00699e-11	1
metab_infant::vam_2000327_pn56	metab_infant::vam_2003571_pn56	0.407849	6.13288e-12	1
metab_infant::vam_1038339_pn12	metab_infant::vam_2039960_pn12	0.407616	2.90166e-12	1
metab_vams_post::vam_1021203_pn56	metab_vams_post::vam_1029523_pn56	0.407288	6.04629e-12	1
metab_infant::vam_2015571_pn34	metab_infant::vam_2033729_pn34	0.407287	3.03006e-12	1
metab_milk::rLC_neg_mtb_1685649_1421	metab_milk::rLC_neg_mtb_1868950_pn12	0.407212	7.2306e-12	1
metab_milk::rLC_neg_mtb_1234544_pn34	metab_milk::rLC_pos_mtb_1793772_1421	0.407176	1.12731e-11	1
metab_infant::vam_1038339_pn12	metab_infant::vam_2040057_pn12	0.406478	3.36657e-12	1
metab_milk::rLC_neg_mtb_1234544_pn34	metab_milk::rLC_neg_mtb_1348891_pn34	0.406291	4.4762e-12	1
metab_infant::vam_2000894_pn56	metab_infant::vam_2011729_pn56	0.405942	7.8048e-12	1
metab_milk::rLC_neg_mtb_4772155_1421	metab_milk::rLC_neg_mtb_4800097_1421	0.405644	6.79461e-12	1
prot_dep::Q8IW92_pn12	prot_naive::A0A0B4J1V2_pn12	0.405161	4.72174e-07	1
metab_infant::vam_1042764_pn56	metab_infant::vam_1044250_pn56	0.405038	8.75096e-12	1
metab_infant::vam_2006570_pn56	metab_infant::vam_2007285_pn56	0.404985	8.79424e-12	1
metab_infant::vam_1005311_pn12	metab_infant::vam_2039878_pn12	0.403759	4.81203e-12	1
milk::TG.22.6_34.1._pn12	metab_milk::rLC_pos_mtb_10007784_pn12	0.403178	3.66755e-12	1
metab_infant::vam_1016289_pn34	metab_infant::vam_2016752_pn34	0.403172	5.18107e-12	1
metab_vams_post::vam_1002045_pn56	metab_infant::vam_1002045_pn56	0.403085	1.21858e-11	1
prot_dep::Q8IW92_pn12	prot_naive::A0A0A0MT89_pn12	0.402803	5.57672e-07	1
metab_infant::vam_1023138_pn12	metab_infant::vam_2030923_pn12	0.402735	5.47509e-12	1
metab_infant::vam_2008919_pn34	metab_infant::vam_2032915_pn34	0.402576	5.58228e-12	1
metab_infant::vam_1008679_pn34	metab_infant::vam_2016752_pn34	0.402277	5.80302e-12	1
metab_infant::vam_1006711_pn56	metab_infant::vam_2003571_pn56	0.40176	1.32173e-11	1
metab_infant::vam_1004153_pn34	metab_infant::vam_1008679_pn34	0.401648	6.26518e-12	1
metab_infant::vam_1016797_pn12	metab_infant::vam_1017889_pn12	0.401105	6.70155e-12	1
metab_milk::rLC_neg_mtb_7508426_pn34	metab_milk::rLC_pos_mtb_10040225_pn34	0.398954	1.13651e-11	1
metab_milk::rLC_pos_mtb_10007784_pn12	metab_milk::rLC_pos_mtb_5080356_pn12	0.398664	6.59574e-12	1
metab_infant::vam_1006527_pn12	metab_infant::vam_1023138_pn12	0.398043	9.97663e-12	1
metab_milk::rLC_neg_mtb_4741641_1421	metab_milk::rLC_neg_mtb_4940784_1421	0.397676	1.86158e-11	1
metab_infant::vam_1015826_pn56	metab_infant::vam_2007285_pn56	0.397645	2.1989e-11	1
metab_infant::vam_2030923_pn12	metab_infant::vam_2041308_pn12	0.397495	1.06946e-11	1
metab_milk::rLC_neg_mtb_1851694_1421	metab_milk::rLC_neg_mtb_4802516_1421	0.397277	1.95761e-11	1
metab_vams_post::vam_1029523_pn56	metab_vams_post::vam_2006570_pn56	0.397199	2.14016e-11	1
milk::Cer.d18.2.24.1._pn34	metab_milk::rLC_neg_mtb_7508426_pn34	0.397145	1.43174e-11	1
metab_infant::vam_1007266_pn34	metab_infant::vam_2007339_pn34	0.397071	1.12731e-11	1
prot_dep::O94979_pn56	prot_dep::P16070_pn56	0.396811	1.20611e-06	1
metab_milk::rLC_neg_mtb_1846883_1421	metab_milk::rLC_neg_mtb_2471187_1421	0.396707	2.0964e-11	1
milk::TG.16.0_40.7._pn12	metab_milk::rLC_pos_mtb_5080356_pn12	0.396606	8.60232e-12	1
metab_milk::rLC_neg_mtb_1234544_pn34	metab_milk::rLC_neg_mtb_2094253_1421	0.396578	4.11684e-11	1
metab_vams_post::vam_1007189_pn56	metab_vams_post::vam_2000894_pn56	0.396102	2.44412e-11	1
metab_vams_post::vam_1006711_pn56	metab_vams_post::vam_2011129_pn56	0.396084	2.44443e-11	1
metab_infant::vam_1009321_pn12	metab_infant::vam_2025775_pn12	0.395885	1.31042e-11	1
metab_milk::rLC_neg_mtb_1348891_pn34	metab_milk::rLC_neg_mtb_2197266_pn12	0.395737	1.85492e-11	1
prot_dep::Q7Z398_pn12	prot_naive::A0A0B4J1V2_pn12	0.395485	9.28955e-07	1
metab_milk::rLC_neg_mtb_7508426_pn34	metab_milk::rLC_pos_mtb_7258182_pn34	0.395309	1.81169e-11	1
metab_infant::vam_2016752_pn34	metab_infant::vam_2033729_pn34	0.394611	1.54398e-11	1
metab_infant::vam_1023091_pn12	metab_infant::vam_1038339_pn12	0.393671	1.74279e-11	1
metab_infant::vam_1022465_pn34	metab_infant::vam_2017110_pn34	0.393311	1.82033e-11	1
metab_plasma::rLC_neg_mtb_1186728_pn12	metab_plasma::rLC_pos_mtb_1693385_pn12	0.39249	0.000255586	1
metab_infant::vam_1006527_pn12	metab_infant::vam_2040057_pn12	0.392461	2.01146e-11	1
metab_infant::vam_1012102_pn56	metab_infant::vam_1024165_pn56	0.392408	4.1567e-11	1
prot_dep::Q8IW92_pn12	prot_naive::A0A0A0MS15_pn12	0.39182	1.19397e-06	1
metab_infant::vam_1028245_pn12	metab_infant::vam_1039807_pn12	0.391674	2.21322e-11	1
metab_infant::vam_1021745_pn12	metab_infant::vam_1041607_pn12	0.39159	2.23302e-11	1
metab_infant::vam_2015571_pn34	metab_infant::vam_2019477_pn34	0.391517	2.25e-11	1
metab_milk::rLC_neg_mtb_1353273_1421	metab_milk::rLC_pos_mtb_1554380_1421	0.391125	4.14547e-11	1
metab_infant::vam_2003571_pn56	metab_infant::vam_2013375_pn56	0.390983	4.92924e-11	1
metab_infant::vam_2021380_pn34	metab_infant::vam_2028637_pn34	0.390634	2.51212e-11	1
metab_infant::vam_1006527_pn12	metab_infant::vam_2006912_pn12	0.390599	2.51855e-11	1
metab_infant::vam_1006527_pn12	metab_infant::vam_1039807_pn12	0.390534	2.53462e-11	1
metab_vams_post::vam_2002382_pn56	metab_vams_post::vam_2004369_pn56	0.390148	5.03031e-11	1
metab_milk::rLC_neg_mtb_4851982_1421	metab_milk::rLC_neg_mtb_916720_1421	0.390061	4.70243e-11	1
metab_vams_post::vam_2006570_pn56	metab_infant::vam_2009731_pn56	0.38951	6.39137e-11	1
metab_plasma::rLC_pos_mtb_5060798_pn12	metab_infant::vam_1042620_pn34	0.389488	0.000287384	1
metab_milk::rLC_neg_mtb_1234544_pn34	metab_milk::rLC_neg_mtb_2705898_pn34	0.38923	3.82099e-11	1
metab_infant::vam_1029340_pn12	metab_infant::vam_1036208_pn12	0.389124	3.03873e-11	1
metab_infant::vam_2015571_pn34	metab_infant::vam_2028637_pn34	0.3888	3.16401e-11	1
metab_milk::rLC_neg_mtb_1348891_pn34	metab_milk::rLC_neg_mtb_1353454_pn34	0.388446	4.16892e-11	1
metab_vams_post::vam_2011129_pn56	metab_infant::vam_2011129_pn56	0.387777	7.83045e-11	1
metab_vams_post::vam_1011553_pn56	metab_vams_post::vam_1012102_pn56	0.387576	6.87374e-11	1
metab_infant::vam_1044250_pn56	metab_infant::vam_2000894_pn56	0.386981	7.92055e-11	1
metab_infant::vam_1023091_pn12	metab_infant::vam_2039534_pn12	0.386932	4.00526e-11	1
metab_milk::rLC_neg_mtb_4802516_1421	metab_milk::rLC_neg_mtb_4940784_1421	0.386919	6.87374e-11	1
metab_infant::vam_1020134_pn34	metab_infant::vam_1042620_pn34	0.386807	4.06209e-11	1
milk::TG.16.0_40.7._pn12	metab_milk::rLC_pos_mtb_7258182_pn12	0.386749	2.98421e-11	1
metab_vams_post::vam_1006121_pn56	metab_vams_post::vam_1021203_pn56	0.386425	7.85344e-11	1
metab_vams_post::vam_1006121_pn56	metab_infant::vam_2011129_pn56	0.386075	9.45368e-11	1
metab_vams_post::vam_1015826_pn56	metab_vams_post::vam_1021203_pn56	0.38561	8.61397e-11	1
metab_vams_post::vam_2000894_pn56	metab_vams_post::vam_2009731_pn56	0.385599	8.61397e-11	1
metab_infant::vam_2003571_pn56	metab_infant::vam_2006570_pn56	0.385258	9.62793e-11	1
metab_infant::vam_1021745_pn12	metab_infant::vam_2039878_pn12	0.384174	5.575e-11	1
metab_vams_post::vam_1015826_pn56	metab_infant::vam_2009731_pn56	0.384146	1.16677e-10	1
metab_infant::vam_1008025_pn12	metab_infant::vam_1023091_pn12	0.383829	5.81702e-11	1
metab_vams_post::vam_1021203_pn56	metab_vams_post::vam_1044250_pn56	0.383776	1.06117e-10	1
metab_vams_post::vam_2003571_pn56	metab_vams_post::vam_2040533_pn56	0.383713	1.0646e-10	1
metab_vams_post::vam_2011129_pn56	metab_infant::vam_1006121_pn56	0.383703	1.22596e-10	1
metab_infant::vam_2028656_pn12	metab_infant::vam_2039960_pn12	0.383378	6.1522e-11	1
metab_milk::rLC_neg_mtb_2068114_1421	metab_milk::rLC_neg_mtb_9569352_1421	0.383359	1.03592e-10	1
metab_infant::vam_2039960_pn12	metab_infant::vam_2040057_pn12	0.383168	6.30804e-11	1
metab_milk::rLC_neg_mtb_3684887_1421	metab_milk::rLC_pos_mtb_1582912_1421	0.383109	1.06117e-10	1
metab_infant::vam_1027659_pn56	metab_infant::vam_2003571_pn56	0.383083	1.22331e-10	1
metab_infant::vam_2019477_pn34	metab_infant::vam_2033729_pn34	0.382248	7.02806e-11	1
metab_infant::vam_1016289_pn34	metab_infant::vam_2015571_pn34	0.382194	7.06313e-11	1
metab_vams_post::vam_1021203_pn56	metab_vams_post::vam_2000894_pn56	0.381937	1.28928e-10	1
metab_milk::rLC_neg_mtb_1348891_pn34	metab_milk::rLC_neg_mtb_1620620_pn34	0.38182	9.1922e-11	1
metab_vams_post::vam_1015826_pn56	metab_vams_post::vam_1029523_pn56	0.381572	1.34164e-10	1
metab_infant::vam_1041607_pn12	metab_infant::vam_1043363_pn12	0.381412	7.77596e-11	1
metab_infant::vam_1044250_pn56	metab_infant::vam_2000327_pn56	0.381257	1.50018e-10	1
metab_infant::vam_1007266_pn34	metab_infant::vam_2016752_pn34	0.381224	7.91746e-11	1
metab_infant::vam_1005311_pn12	metab_infant::vam_2025775_pn12	0.380493	8.61397e-11	1
metab_infant::vam_2039878_pn12	metab_infant::vam_2041308_pn12	0.3801	9.01257e-11	1
milk::Cer.d18.2.24.1._pn34	milk::Se_pn34	0.379955	1.50018e-10	1
metab_infant::vam_1003801_pn12	metab_infant::vam_2005992_pn12	0.37985	9.26681e-11	1
metab_infant::vam_1001604_pn34	metab_infant::vam_2017110_pn34	0.379753	9.36404e-11	1
metab_milk::rLC_neg_mtb_4772155_1421	metab_milk::rLC_neg_mtb_4940784_1421	0.37916	1.65261e-10	1
metab_milk::rLC_neg_mtb_6361405_pn12	metab_milk::rLC_neg_mtb_6704225_pn12	0.379149	7.57023e-11	1
metab_infant::vam_1003801_pn12	metab_infant::vam_2030923_pn12	0.378771	1.05256e-10	1
metab_vams_post::vam_1015826_pn56	metab_vams_post::vam_2011729_pn56	0.378506	1.92516e-10	1
metab_infant::vam_2003623_pn12	metab_infant::vam_2030112_pn12	0.378497	1.07923e-10	1
metab_infant::vam_1003267_pn12	metab_infant::vam_1030068_pn12	0.378435	1.08565e-10	1
metab_infant::vam_1008665_pn12	metab_infant::vam_1041607_pn12	0.378368	1.09275e-10	1
metab_vams_post::vam_1015826_pn56	metab_infant::vam_2006570_pn56	0.378299	2.27538e-10	1
metab_infant::vam_1008679_pn34	metab_infant::vam_1016289_pn34	0.378238	1.1072e-10	1
metab_infant::vam_2015571_pn34	metab_infant::vam_2021380_pn34	0.378234	1.1072e-10	1
metab_infant::vam_1023091_pn12	metab_infant::vam_2028656_pn12	0.378213	1.10813e-10	1
metab_infant::vam_1029523_pn56	metab_infant::vam_1042764_pn56	0.378068	2.17071e-10	1
milk::TG.16.1_34.1._pn12	metab_milk::rLC_pos_mtb_4813295_pn12	0.377934	8.67464e-11	1
metab_infant::vam_1023091_pn12	metab_infant::vam_1023252_pn12	0.377489	1.20501e-10	1
metab_infant::vam_2028637_pn34	metab_infant::vam_2033729_pn34	0.377258	1.23372e-10	1
metab_milk::rLC_neg_mtb_1353273_1421	metab_milk::rLC_neg_mtb_1620620_pn34	0.377229	3.66198e-10	1
metab_infant::vam_1004153_pn34	metab_infant::vam_2038292_pn34	0.376616	1.32524e-10	1
milk::X2.FL_pn12	metab_milk::rLC_neg_mtb_1353273_1421	0.376615	2.75385e-10	1
metab_vams_post::vam_2000327_pn56	metab_vams_post::vam_2039956_pn56	0.376307	2.47166e-10	1
metab_infant::vam_1008679_pn34	metab_infant::vam_2007339_pn34	0.375726	1.47383e-10	1
metab_infant::vam_2009944_pn34	metab_infant::vam_2015571_pn34	0.375557	1.50018e-10	1
milk::TG.22.6_34.1._pn12	metab_milk::rLC_pos_mtb_5080356_pn12	0.375477	1.14403e-10	1
metab_milk::rLC_neg_mtb_2705898_pn34	metab_milk::rLC_pos_mtb_1209516_1421	0.375381	4.51772e-10	1
metab_infant::vam_1011758_pn56	metab_infant::vam_1029523_pn56	0.374877	3.10915e-10	1
metab_milk::rLC_neg_mtb_4800097_1421	metab_milk::rLC_neg_mtb_4802516_1421	0.374388	2.84446e-10	1
metab_vams_post::vam_1015826_pn56	metab_vams_post::vam_1016296_pn56	0.374135	3.14143e-10	1
metab_milk::rLC_neg_mtb_2068114_1421	metab_milk::rLC_neg_mtb_916720_1421	0.373907	3.01077e-10	1
metab_infant::vam_1023138_pn12	metab_infant::vam_2041308_pn12	0.373757	1.86108e-10	1
metab_vams_post::vam_1000894_pn56	metab_vams_post::vam_1012102_pn56	0.373713	3.2819e-10	1
metab_infant::vam_1006121_pn56	metab_infant::vam_2000894_pn56	0.373656	3.53957e-10	1
metab_infant::vam_2008919_pn34	metab_infant::vam_2021380_pn34	0.373439	1.92926e-10	1
metab_infant::vam_2003218_pn34	metab_infant::vam_2007339_pn34	0.373216	1.97993e-10	1
metab_infant::vam_1003801_pn12	metab_infant::vam_1023091_pn12	0.373063	2.01431e-10	1
metab_infant::vam_2016752_pn34	metab_infant::vam_2021380_pn34	0.373039	2.01662e-10	1
metab_milk::rLC_neg_mtb_1596675_pn12	metab_milk::rLC_neg_mtb_2471187_1421	0.37236	4.42041e-10	1
metab_infant::vam_2003623_pn12	metab_infant::vam_2032139_pn12	0.372083	2.25456e-10	1
metab_vams_post::vam_2006570_pn56	metab_infant::vam_2011129_pn56	0.371858	4.64682e-10	1
metab_plasma::rLC_neg_mtb_4496106_pn12	metab_infant::vam_2032028_pn34	0.371563	0.000569942	1
metab_infant::vam_1008679_pn34	metab_infant::vam_2021380_pn34	0.371405	2.44289e-10	1
metab_infant::vam_2009944_pn34	metab_infant::vam_2033729_pn34	0.37082	2.61206e-10	1
metab_vams_post::vam_1000749_pn56	metab_vams_post::vam_1011947_pn56	0.370772	4.55727e-10	1
metab_infant::vam_1015826_pn56	metab_infant::vam_2000894_pn56	0.370747	4.89376e-10	1
metab_infant::vam_1006552_pn34	metab_infant::vam_2032915_pn34	0.370549	2.6911e-10	1
metab_milk::rLC_neg_mtb_2705898_pn34	metab_milk::rLC_pos_mtb_1181693_pn34	0.37042	3.33469e-10	1
metab_vams_post::vam_1000309_pn56	metab_vams_post::vam_1021203_pn56	0.369778	5.06963e-10	1
metab_infant::vam_1015535_pn34	metab_infant::vam_1020317_pn34	0.369418	3.05504e-10	1
metab_infant::vam_1002909_pn34	metab_infant::vam_2017110_pn34	0.369246	3.10915e-10	1
metab_infant::vam_2008919_pn34	metab_infant::vam_2028637_pn34	0.369117	3.14255e-10	1
metab_vams_post::vam_2000894_pn56	metab_vams_post::vam_2011729_pn56	0.369095	5.45458e-10	1
metab_infant::vam_1023091_pn12	metab_infant::vam_1043363_pn12	0.368866	3.23512e-10	1
metab_milk::rLC_neg_mtb_2471187_1421	metab_milk::rLC_pos_mtb_1793772_1421	0.368499	5.44342e-10	1
metab_infant::vam_1008679_pn34	metab_infant::vam_2032915_pn34	0.368316	3.43645e-10	1
metab_infant::vam_1008025_pn12	metab_infant::vam_2030923_pn12	0.368222	3.47031e-10	1
metab_milk::rLC_neg_mtb_2705898_pn34	metab_milk::rLC_pos_mtb_1554380_1421	0.368015	1.00053e-09	1
metab_milk::rLC_pos_mtb_5080356_pn12	metab_milk::rLC_pos_mtb_7258182_pn12	0.367882	2.75747e-10	1
metab_milk::rLC_neg_mtb_6419699_pn12	metab_milk::rLC_neg_mtb_6673225_pn12	0.367677	2.82356e-10	1
metab_vams_post::vam_1005685_pn56	metab_vams_post::vam_1012102_pn56	0.367667	6.41103e-10	1
metab_milk::rLC_neg_mtb_4800097_1421	metab_milk::rLC_pos_mtb_2988097_1421	0.367061	6.40726e-10	1
metab_infant::vam_1003290_pn12	metab_infant::vam_1004055_pn12	0.366758	4.11311e-10	1
metab_milk::rLC_neg_mtb_6793455_pn34	metab_milk::rLC_pos_mtb_4159213_pn34	0.366033	5.44342e-10	1
metab_infant::vam_2006912_pn12	metab_infant::vam_2030923_pn12	0.36589	4.53235e-10	1
metab_infant::vam_1006121_pn56	metab_infant::vam_2007285_pn56	0.365656	8.58073e-10	1
metab_infant::vam_2007339_pn34	metab_infant::vam_2015571_pn34	0.365483	4.72904e-10	1
metab_infant::vam_1021203_pn56	metab_infant::vam_2003571_pn56	0.36543	8.77242e-10	1
metab_infant::vam_2015571_pn34	metab_infant::vam_2030437_pn34	0.365227	4.8699e-10	1
milk::TG.22.6_34.1._pn12	metab_milk::rLC_pos_mtb_7258182_pn12	0.365135	3.74315e-10	1
metab_infant::vam_2030112_pn12	metab_infant::vam_2032139_pn12	0.365044	4.96271e-10	1
metab_infant::vam_2019477_pn34	metab_infant::vam_2038292_pn34	0.364971	4.99808e-10	1
metab_milk::rLC_neg_mtb_1348891_pn34	metab_milk::rLC_neg_mtb_1787234_pn34	0.364923	6.17869e-10	1
milk::FAT_pn12	metab_milk::rLC_pos_mtb_5310734_pn12	0.364832	5.44135e-10	1
metab_infant::vam_1035179_pn12	metab_infant::vam_2040057_pn12	0.364805	5.08225e-10	1
metab_milk::rLC_neg_mtb_4851982_1421	metab_milk::rLC_neg_mtb_9569352_1421	0.364708	8.3014e-10	1
metab_infant::vam_2000327_pn56	metab_infant::vam_2000894_pn56	0.364126	1.00737e-09	1
metab_milk::rLC_neg_mtb_1846872_1421	metab_milk::rLC_neg_mtb_2471187_1421	0.363957	8.98146e-10	1
metab_infant::vam_1006552_pn34	metab_infant::vam_1007266_pn34	0.363877	5.63761e-10	1
metab_vams_post::vam_1011758_pn56	metab_vams_post::vam_2001391_pn56	0.363758	9.82542e-10	1
metab_infant::vam_1006711_pn56	metab_infant::vam_2007285_pn56	0.363556	1.06996e-09	1
metab_infant::vam_2024038_pn12	metab_infant::vam_2028656_pn12	0.362929	6.29789e-10	1
metab_infant::vam_2037589_pn12	metab_infant::vam_2039960_pn12	0.36246	6.60816e-10	1
metab_infant::vam_1009321_pn12	metab_infant::vam_2041308_pn12	0.362273	6.74641e-10	1
metab_infant::vam_1016289_pn34	metab_infant::vam_2038292_pn34	0.361991	6.96693e-10	1
metab_infant::vam_1006527_pn12	metab_infant::vam_2030112_pn12	0.361833	7.08863e-10	1
metab_infant::vam_2002382_pn56	metab_infant::vam_2004369_pn56	0.361686	1.31514e-09	1
metab_infant::vam_2003571_pn56	metab_infant::vam_2011129_pn56	0.361508	1.34043e-09	1
metab_infant::vam_2010405_pn12	metab_infant::vam_2030923_pn12	0.361285	7.55535e-10	1
metab_infant::vam_2006912_pn12	metab_infant::vam_2041308_pn12	0.361102	7.69821e-10	1
metab_milk::rLC_neg_mtb_1284156_pn12	metab_plasma::rLC_neg_mtb_3194811_pn12	0.360921	0.000838762	1
metab_infant::vam_2007285_pn56	metab_infant::vam_2009731_pn56	0.360747	1.45911e-09	1
milk::X2.FL_pn12	metab_milk::rLC_neg_mtb_1348891_pn34	0.360725	1.04448e-09	1
metab_infant::vam_1008025_pn12	metab_infant::vam_1023252_pn12	0.360137	8.58073e-10	1
metab_infant::vam_1009321_pn12	metab_infant::vam_1041607_pn12	0.359984	8.72425e-10	1
metab_vams_post::vam_1006121_pn56	metab_infant::vam_2006570_pn56	0.359907	1.69984e-09	1
metab_infant::vam_1007266_pn34	metab_infant::vam_1035969_pn34	0.359796	8.89278e-10	1
metab_vams_post::vam_1000749_pn56	metab_vams_post::vam_2003220_pn56	0.359681	1.53204e-09	1
metab_infant::vam_2032139_pn12	metab_infant::vam_2040057_pn12	0.359324	9.35942e-10	1
metab_vams_post::vam_1011947_pn56	metab_vams_post::vam_1012015_pn56	0.359038	1.6374e-09	1
metab_milk::rLC_neg_mtb_4772155_1421	metab_milk::rLC_neg_mtb_4802516_1421	0.359002	1.5413e-09	1
metab_vams_post::vam_1006121_pn56	metab_infant::vam_2009731_pn56	0.358707	1.94116e-09	1
metab_infant::vam_1008665_pn12	metab_infant::vam_2033633_pn12	0.358125	1.06517e-09	1
metab_milk::rLC_neg_mtb_1685649_1421	metab_milk::rLC_neg_mtb_2705898_pn34	0.357857	2.92176e-09	1
metab_infant::vam_1008665_pn12	metab_infant::vam_2041308_pn12	0.357715	1.11271e-09	1
metab_vams_post::vam_1016296_pn56	metab_vams_post::vam_2003571_pn56	0.357565	1.92449e-09	1
metab_infant::vam_1023091_pn12	metab_infant::vam_2010405_pn12	0.357494	1.14034e-09	1
prot_dep::O94979_pn56	prot_naive::A0A075B6S5_pn56	0.357327	1.47092e-05	1
metab_milk::rLC_neg_mtb_1868950_pn12	metab_plasma::rLC_neg_mtb_3194811_pn12	0.357311	0.000952862	1
metab_vams_post::vam_2000327_pn56	metab_infant::vam_2000327_pn56	0.356873	2.35966e-09	1
metab_infant::vam_1004055_pn12	metab_infant::vam_2030923_pn12	0.356671	1.25235e-09	1
metab_infant::vam_1016289_pn34	metab_infant::vam_2007339_pn34	0.356248	1.31399e-09	1
metab_infant::vam_1029523_pn56	metab_infant::vam_2001391_pn56	0.355748	2.4773e-09	1
metab_infant::vam_2009944_pn34	metab_infant::vam_2028637_pn34	0.355049	1.50041e-09	1
metab_infant::vam_2026897_pn12	metab_infant::vam_2033633_pn12	0.354561	1.58023e-09	1
metab_infant::vam_2030112_pn12	metab_infant::vam_2040057_pn12	0.354552	1.58023e-09	1
metab_vams_post::vam_1029523_pn56	metab_vams_post::vam_1042764_pn56	0.354459	2.65325e-09	1
metab_infant::vam_2030437_pn34	metab_infant::vam_2033729_pn34	0.354297	1.62546e-09	1
metab_milk::rLC_neg_mtb_4711306_pn34	metab_milk::rLC_neg_mtb_4774599_pn34	0.354285	1.97657e-09	1
metab_infant::vam_1003801_pn12	metab_infant::vam_1006527_pn12	0.35405	1.66696e-09	1
prot_dep::P78527_pn12	prot_naive::Q15428_pn12	0.354007	1.35298e-05	1
metab_milk::rLC_neg_mtb_2068114_1421	metab_milk::rLC_neg_mtb_2149315_1421	0.353797	2.6664e-09	1
metab_infant::vam_1008025_pn12	metab_infant::vam_1016797_pn12	0.353078	1.85885e-09	1
metab_milk::rLC_neg_mtb_2197266_pn12	metab_milk::rLC_neg_mtb_2705898_pn34	0.352801	2.4725e-09	1
metab_milk::rLC_neg_mtb_1596675_pn12	metab_milk::rLC_neg_mtb_2705898_pn34	0.352773	2.4768e-09	1
metab_infant::vam_1029340_pn12	metab_infant::vam_2028656_pn12	0.352322	2.01378e-09	1
metab_milk::rLC_neg_mtb_4741641_1421	metab_milk::rLC_neg_mtb_4772155_1421	0.352094	3.20013e-09	1
metab_infant::vam_2003218_pn34	metab_infant::vam_2015571_pn34	0.352034	2.07887e-09	1
metab_plasma::rLC_pos_mtb_5060798_pn12	metab_vams_post::vam_1012684_pn56	0.351942	0.0013254	1
metab_infant::vam_1008025_pn12	metab_infant::vam_1039807_pn12	0.351627	2.17558e-09	1
milk::Se_pn34	metab_milk::rLC_pos_mtb_10040225_pn34	0.351613	3.36894e-09	1
metab_vams_post::vam_1006121_pn56	metab_vams_post::vam_1016296_pn56	0.351554	3.61327e-09	1
metab_infant::vam_2012513_pn34	metab_infant::vam_2038292_pn34	0.351426	2.22335e-09	1
metab_vams_post::vam_1021203_pn56	metab_vams_post::vam_2001391_pn56	0.351282	3.70378e-09	1
metab_infant::vam_2008190_pn34	metab_infant::vam_2017110_pn34	0.351069	2.3134e-09	1
metab_infant::vam_2012513_pn34	metab_infant::vam_2033729_pn34	0.350965	2.33772e-09	1
prot_dep::P25311_pn56	prot_naive::P16070_pn56	0.350935	2.13885e-05	1
metab_infant::vam_1009085_pn34	metab_infant::vam_1042620_pn34	0.350523	2.45241e-09	1
metab_infant::vam_1005311_pn12	metab_infant::vam_2026897_pn12	0.350386	2.4773e-09	1
metab_infant::vam_1006527_pn12	metab_infant::vam_2037589_pn12	0.35038	2.4773e-09	1
metab_infant::vam_1021745_pn12	metab_infant::vam_1030068_pn12	0.35008	2.55374e-09	1
metab_infant::vam_2000894_pn56	metab_infant::vam_2009731_pn56	0.350044	4.50373e-09	1
metab_infant::vam_2009944_pn34	metab_infant::vam_2019477_pn34	0.349987	2.5774e-09	1
metab_infant::vam_1022239_pn34	metab_infant::vam_2016752_pn34	0.349923	2.5926e-09	1
metab_infant::vam_2033516_pn12	metab_infant::vam_2040057_pn12	0.349381	2.74273e-09	1
metab_infant::vam_1000894_pn56	metab_infant::vam_1012102_pn56	0.349066	4.97115e-09	1
metab_infant::vam_1007266_pn34	metab_infant::vam_2015571_pn34	0.349066	2.8393e-09	1
metab_infant::vam_2007339_pn34	metab_infant::vam_2028637_pn34	0.348792	2.92176e-09	1
metab_infant::vam_1016289_pn34	metab_infant::vam_2021380_pn34	0.348776	2.92176e-09	1
metab_infant::vam_2016752_pn34	metab_infant::vam_2028637_pn34	0.348764	2.92176e-09	1
metab_plasma::rLC_pos_mtb_5060798_pn12	metab_infant::vam_2008190_pn34	0.348726	0.00128575	1
metab_milk::rLC_neg_mtb_1353454_pn34	metab_milk::rLC_neg_mtb_2471187_1421	0.348709	7.40951e-09	1
metab_vams_post::vam_2003571_pn56	metab_vams_post::vam_2009731_pn56	0.348381	5.01097e-09	1
milk::LSTb_pn34	metab_milk::rLC_neg_mtb_2072948_1421	0.347932	7.96377e-09	1
metab_infant::vam_1023091_pn12	metab_infant::vam_2040057_pn12	0.347613	3.32203e-09	1
metab_vams_post::vam_2007285_pn56	metab_vams_post::vam_2009731_pn56	0.347598	5.43473e-09	1
milk::X2.FL_pn12	metab_milk::rLC_pos_mtb_1756040_pn12	0.347509	2.61922e-09	1
metab_infant::vam_2000327_pn56	metab_infant::vam_2011729_pn56	0.347503	5.81908e-09	1
metab_infant::vam_1008679_pn34	metab_infant::vam_2019477_pn34	0.346897	3.58832e-09	1
metab_vams_post::vam_1021203_pn56	metab_vams_post::vam_2006570_pn56	0.346763	5.90244e-09	1
metab_infant::vam_2007339_pn34	metab_infant::vam_2016752_pn34	0.346659	3.67608e-09	1
metab_infant::vam_2019477_pn34	metab_infant::vam_2028637_pn34	0.346643	3.67743e-09	1
metab_infant::vam_1038339_pn12	metab_infant::vam_2030923_pn12	0.346587	3.69539e-09	1
metab_milk::rLC_neg_mtb_4851982_1421	metab_milk::rLC_neg_mtb_5139140_1421	0.346503	5.71168e-09	1
metab_infant::vam_1030068_pn12	metab_infant::vam_2025775_pn12	0.346029	3.91975e-09	1
milk::Se_pn34	metab_milk::rLC_pos_mtb_7258182_pn34	0.34548	6.31592e-09	1
metab_milk::rLC_neg_mtb_1348891_pn34	metab_milk::rLC_neg_mtb_1846883_1421	0.345412	1.01716e-08	1
metab_infant::vam_1044250_pn56	metab_infant::vam_2001391_pn56	0.345319	7.23579e-09	1
metab_vams_post::vam_1000894_pn56	metab_vams_post::vam_1011553_pn56	0.345309	6.83295e-09	1
metab_vams_post::vam_1006711_pn56	metab_vams_post::vam_2000894_pn56	0.345227	6.88487e-09	1
metab_infant::vam_1041607_pn12	metab_infant::vam_2025775_pn12	0.34508	4.35098e-09	1
metab_milk::rLC_neg_mtb_1596675_pn12	metab_milk::rLC_pos_mtb_1756040_pn12	0.344964	3.44762e-09	1
metab_infant::vam_1023252_pn12	metab_infant::vam_1039807_pn12	0.344804	4.48234e-09	1
metab_infant::vam_1039807_pn12	metab_infant::vam_2041308_pn12	0.344667	4.53282e-09	1
metab_plasma::rLC_neg_mtb_4091474_pn12	metab_infant::vam_1008665_pn12	0.34449	0.00169595	1
metab_vams_post::vam_1001875_pn56	metab_vams_post::vam_1011947_pn56	0.344471	7.40951e-09	1
metab_infant::vam_1021203_pn56	metab_infant::vam_1027659_pn56	0.344398	7.91644e-09	1
metab_milk::rLC_neg_mtb_2149315_1421	metab_milk::rLC_neg_mtb_9569352_1421	0.344324	7.10421e-09	1
metab_infant::vam_1035179_pn12	metab_infant::vam_2024038_pn12	0.34428	4.72772e-09	1
metab_infant::vam_2033516_pn12	metab_infant::vam_2039960_pn12	0.344261	4.73147e-09	1
metab_vams_post::vam_1016296_pn56	metab_vams_post::vam_1029523_pn56	0.344134	7.6568e-09	1
milk::FAT_pn12	metab_milk::rLC_pos_mtb_4813295_pn12	0.343871	5.21431e-09	1
metab_infant::vam_1035179_pn12	metab_infant::vam_1038339_pn12	0.34346	5.13354e-09	1
metab_plasma::rLC_pos_mtb_3523177_pn12	metab_vams_post::vam_1021203_pn56	0.34343	0.00175537	1
metab_milk::rLC_neg_mtb_1234544_pn34	metab_milk::rLC_neg_mtb_2471187_1421	0.343373	1.22927e-08	1
metab_infant::vam_2003218_pn34	metab_infant::vam_2028637_pn34	0.343357	5.18577e-09	1
metab_plasma::rLC_pos_mtb_3523177_pn12	metab_vams_post::vam_1007189_pn56	0.343024	0.00177774	1
metab_milk::rLC_neg_mtb_2094253_1421	metab_milk::rLC_neg_mtb_2471187_1421	0.342957	8.08714e-09	1
metab_infant::vam_1029523_pn56	metab_infant::vam_2000327_pn56	0.342862	9.195e-09	1
metab_infant::vam_1000574_pn12	metab_infant::vam_2005992_pn12	0.342466	5.69189e-09	1
metab_infant::vam_2024038_pn12	metab_infant::vam_2039960_pn12	0.342263	5.80471e-09	1
metab_vams_post::vam_1006711_pn56	metab_infant::vam_1006711_pn56	0.342139	1.04096e-08	1
metab_milk::rLC_pos_mtb_5080356_pn12	metab_plasma::rLC_pos_mtb_3523177_pn12	0.341979	0.00161437	1
metab_infant::vam_2026897_pn12	metab_infant::vam_2028656_pn12	0.341837	6.05368e-09	1
metab_infant::vam_1035179_pn12	metab_infant::vam_2037589_pn12	0.341533	6.25368e-09	1
metab_milk::rLC_pos_mtb_4417692_pn12	metab_plasma::rLC_pos_mtb_3523177_pn12	0.341486	0.00164016	1
metab_infant::vam_1016289_pn34	metab_infant::vam_2003218_pn34	0.341467	6.28455e-09	1
metab_infant::vam_2012513_pn34	metab_infant::vam_2016752_pn34	0.341464	6.28455e-09	1
metab_infant::vam_1043363_pn12	metab_infant::vam_2006912_pn12	0.341365	6.33724e-09	1
metab_infant::vam_2030112_pn12	metab_infant::vam_2037589_pn12	0.341298	6.37577e-09	1
metab_infant::vam_1035179_pn12	metab_infant::vam_2033516_pn12	0.341247	6.40359e-09	1
metab_milk::rLC_neg_mtb_4655971_1421	metab_milk::rLC_neg_mtb_4940784_1421	0.34115	9.66326e-09	1
metab_milk::rLC_neg_mtb_1846872_1421	metab_milk::rLC_neg_mtb_2705898_pn34	0.341105	1.53009e-08	1
metab_vams_post::vam_1006121_pn56	metab_vams_post::vam_1007189_pn56	0.341069	1.03246e-08	1
metab_vams_post::vam_1016296_pn56	metab_vams_post::vam_2006570_pn56	0.340967	1.04096e-08	1
metab_vams_post::vam_1006121_pn56	metab_vams_post::vam_1029523_pn56	0.340583	1.07833e-08	1
metab_infant::vam_1003267_pn12	metab_infant::vam_2005414_pn12	0.340311	7.07618e-09	1
metab_vams_post::vam_1021203_pn56	metab_vams_post::vam_2009731_pn56	0.340227	1.11776e-08	1
metab_infant::vam_1002909_pn34	metab_infant::vam_1004442_pn34	0.340206	7.13956e-09	1
metab_infant::vam_2005414_pn12	metab_infant::vam_2039878_pn12	0.340058	7.2387e-09	1
metab_milk::rLC_neg_mtb_1620620_pn34	metab_milk::rLC_pos_mtb_1756040_pn12	0.339702	9.39667e-09	1
metab_infant::vam_1009321_pn12	metab_infant::vam_2006912_pn12	0.339649	7.54337e-09	1
metab_vams_post::vam_2011129_pn56	metab_infant::vam_1015826_pn56	0.339533	1.33199e-08	1
metab_infant::vam_2009944_pn34	metab_infant::vam_2016752_pn34	0.339528	7.63499e-09	1
metab_plasma::rLC_pos_mtb_636920_tri3	prot_dep::Q8IW92_pn12	0.339514	3.60597e-05	1
metab_milk::rLC_neg_mtb_916720_1421	metab_milk::rLC_neg_mtb_9569352_1421	0.339431	1.13761e-08	1
prot_dep::P25311_pn56	prot_dep::Q96N11_pn56	0.339235	4.15597e-05	1
metab_infant::vam_1001604_pn34	metab_infant::vam_2008190_pn34	0.339135	7.92906e-09	1
metab_infant::vam_1039807_pn12	metab_infant::vam_1043363_pn12	0.339125	7.92906e-09	1
metab_vams_post::vam_2003571_pn56	metab_vams_post::vam_2006570_pn56	0.339082	1.24201e-08	1
metab_plasma::rLC_neg_mtb_4091474_pn12	metab_infant::vam_1030068_pn12	0.338866	0.00203717	1
metab_infant::vam_1008679_pn34	metab_infant::vam_2032136_pn34	0.338725	8.24281e-09	1
metab_infant::vam_1042620_pn34	metab_infant::vam_2017110_pn34	0.338619	8.32956e-09	1
metab_vams_post::vam_1011758_pn56	metab_vams_post::vam_1027659_pn56	0.338575	1.30654e-08	1
metab_infant::vam_1030068_pn12	metab_infant::vam_2026897_pn12	0.338296	8.60806e-09	1
metab_infant::vam_1003290_pn12	prot_dep::Q9UBX5_tri3	0.338261	4.67061e-05	1
metab_infant::vam_1016289_pn34	metab_infant::vam_2009944_pn34	0.337985	8.89642e-09	1
metab_vams_post::vam_1000749_pn56	metab_vams_post::vam_1006121_pn56	0.337874	1.3996e-08	1
metab_infant::vam_1039807_pn12	metab_infant::vam_1041607_pn12	0.337831	9.02465e-09	1
metab_milk::rLC_neg_mtb_1348891_pn34	metab_milk::rLC_neg_mtb_1596675_pn12	0.337828	1.12477e-08	1
metab_infant::vam_1027659_pn56	metab_infant::vam_1044250_pn56	0.33767	1.51108e-08	1
metab_infant::vam_1006527_pn12	metab_infant::vam_2039534_pn12	0.337631	9.20117e-09	1
metab_infant::vam_2008919_pn34	metab_infant::vam_2033729_pn34	0.337492	9.33021e-09	1
metab_infant::vam_1039807_pn12	metab_infant::vam_2006912_pn12	0.337331	9.47173e-09	1
metab_infant::vam_1035969_pn34	metab_infant::vam_2008919_pn34	0.337303	9.48854e-09	1
metab_plasma::rLC_neg_mtb_4091474_pn12	metab_infant::vam_1009321_pn12	0.336969	0.00216369	1
metab_infant::vam_1003267_pn12	metab_infant::vam_2039878_pn12	0.336829	9.95564e-09	1
metab_vams_post::vam_2003571_pn56	metab_infant::vam_2000894_pn56	0.336805	1.73242e-08	1
metab_milk::rLC_pos_mtb_1554380_1421	metab_plasma::rLC_neg_mtb_3194811_pn12	0.336653	0.00417381	1
metab_infant::vam_1006121_pn56	metab_infant::vam_2000327_pn56	0.33664	1.66929e-08	1
metab_milk::rLC_neg_mtb_7508426_pn34	metab_milk::rLC_pos_mtb_4159213_pn34	0.336254	1.2356e-08	1
metab_vams_post::vam_1006121_pn56	metab_infant::vam_1006711_pn56	0.336201	1.83098e-08	1
milk::TG.16.0_40.7._pn12	metab_milk::rLC_pos_mtb_4813295_pn12	0.336157	8.51803e-09	1
metab_infant::vam_2008919_pn34	metab_infant::vam_2038292_pn34	0.336131	1.06356e-08	1
metab_vams_post::vam_1027659_pn56	metab_vams_post::vam_1029523_pn56	0.336122	1.65995e-08	1
metab_infant::vam_1023138_pn12	metab_infant::vam_2006912_pn12	0.336116	1.06386e-08	1
milk::Se_pn34	prot_naive::P49908_pn12	0.336109	5.24569e-05	1
metab_milk::rLC_neg_mtb_1348891_pn34	metab_milk::rLC_neg_mtb_1846872_1421	0.335505	2.59206e-08	1
metab_vams_post::vam_2008011_pn56	prot_dep::P04075_pn12	0.335361	5.14103e-05	1
metab_infant::vam_2003218_pn34	metab_infant::vam_2033729_pn34	0.335354	1.1444e-08	1
metab_milk::rLC_neg_mtb_1787234_pn34	metab_milk::rLC_neg_mtb_2471187_1421	0.335171	2.67669e-08	1
metab_vams_post::vam_1006711_pn56	metab_infant::vam_1015826_pn56	0.335154	2.02234e-08	1
metab_infant::vam_2003218_pn34	metab_infant::vam_2021380_pn34	0.335004	1.18653e-08	1
metab_infant::vam_1006527_pn12	metab_infant::vam_2041308_pn12	0.334999	1.18653e-08	1
metab_milk::rLC_neg_mtb_1337137_1421	metab_plasma::rLC_pos_mtb_5060798_pn12	0.334909	0.00437633	1
metab_milk::rLC_neg_mtb_4655971_1421	metab_milk::rLC_neg_mtb_4741641_1421	0.334859	1.76353e-08	1
metab_infant::vam_2028637_pn34	metab_infant::vam_2030437_pn34	0.334782	1.21335e-08	1
metab_milk::rLC_neg_mtb_1846872_1421	metab_plasma::rLC_neg_mtb_3194811_pn12	0.334775	0.00438949	1
metab_infant::vam_1003801_pn12	metab_infant::vam_2006912_pn12	0.334757	1.21349e-08	1
metab_vams_post::vam_2003571_pn56	metab_vams_post::vam_2013375_pn56	0.334751	1.88041e-08	1
metab_infant::vam_1029523_pn56	metab_infant::vam_2003571_pn56	0.33472	1.99615e-08	1
metab_infant::vam_2007285_pn56	metab_infant::vam_2011129_pn56	0.33438	2.05895e-08	1
metab_infant::vam_2033633_pn12	metab_infant::vam_2039878_pn12	0.334376	1.25688e-08	1
metab_vams_post::vam_1000894_pn56	metab_vams_post::vam_1005685_pn56	0.334266	1.97222e-08	1
metab_infant::vam_1011758_pn56	metab_infant::vam_1015826_pn56	0.334039	2.12395e-08	1
metab_infant::vam_2005095_pn34	metab_infant::vam_2032136_pn34	0.33386	1.32431e-08	1
metab_infant::vam_2010405_pn12	metab_infant::vam_2039534_pn12	0.333808	1.33003e-08	1
metab_vams_post::vam_2009731_pn56	metab_vams_post::vam_2011729_pn56	0.333672	2.08481e-08	1
metab_infant::vam_1021160_pn12	metab_infant::vam_1023091_pn12	0.33364	1.35122e-08	1
metab_infant::vam_1000749_pn56	metab_infant::vam_1012015_pn56	0.333521	2.2321e-08	1
metab_vams_post::vam_1006711_pn56	metab_vams_post::vam_2007285_pn56	0.333322	2.15021e-08	1
metab_infant::vam_2005414_pn12	metab_infant::vam_2025775_pn12	0.333161	1.41944e-08	1
metab_infant::vam_1008665_pn12	metab_infant::vam_1023091_pn12	0.332978	1.44589e-08	1
metab_infant::vam_1006552_pn34	metab_infant::vam_2008919_pn34	0.332968	1.44589e-08	1
metab_milk::rLC_pos_mtb_4513200_pn34	metab_milk::rLC_pos_mtb_5709_pn34	0.33252	1.77206e-08	1
metab_infant::vam_2003218_pn34	metab_infant::vam_2038292_pn34	0.332306	1.54338e-08	1
metab_infant::vam_1012943_pn34	metab_infant::vam_1022465_pn34	0.331899	1.60853e-08	1
metab_vams_post::vam_1029523_pn56	metab_vams_post::vam_2000894_pn56	0.33185	2.48888e-08	1
metab_infant::vam_2019477_pn34	metab_infant::vam_2032136_pn34	0.33178	1.62728e-08	1
metab_infant::vam_2006912_pn12	metab_infant::vam_2033516_pn12	0.331651	1.64803e-08	1
metab_infant::vam_1006711_pn56	metab_infant::vam_2011729_pn56	0.331583	2.69524e-08	1
metab_vams_post::vam_1006711_pn56	metab_infant::vam_1006121_pn56	0.331575	2.85101e-08	1
metab_vams_post::vam_1011553_pn56	metab_vams_post::vam_1024165_pn56	0.331469	2.58078e-08	1
metab_infant::vam_1022239_pn34	metab_infant::vam_2007339_pn34	0.331465	1.67522e-08	1
metab_milk::rLC_neg_mtb_5333556_pn34	metab_plasma::rLC_pos_mtb_3523177_pn12	0.331284	0.00276033	1
metab_infant::vam_1006527_pn12	metab_infant::vam_2028656_pn12	0.331123	1.73113e-08	1
metab_infant::vam_1030006_pn34	metab_infant::vam_1038175_pn34	0.331114	1.73113e-08	1
metab_infant::vam_1007266_pn34	metab_infant::vam_2024224_pn34	0.331053	1.73815e-08	1
metab_infant::vam_2005095_pn34	metab_infant::vam_2012513_pn34	0.331034	1.7396e-08	1
metab_infant::vam_2025775_pn12	metab_infant::vam_2033633_pn12	0.330549	1.82372e-08	1
metab_infant::vam_1004055_pn12	metab_infant::vam_1004554_pn12	0.330452	1.83831e-08	1
milk::Se_pn34	metab_milk::rLC_neg_mtb_6793455_pn34	0.330386	2.70667e-08	1
metab_infant::vam_1004554_pn12	metab_infant::vam_2006912_pn12	0.330382	1.84978e-08	1
metab_vams_post::vam_1021203_pn56	metab_vams_post::vam_2016288_pn56	0.330368	2.86489e-08	1
metab_infant::vam_1001875_pn56	metab_infant::vam_2005961_pn56	0.330327	3.03234e-08	1
metab_vams_post::vam_1016296_pn56	metab_vams_post::vam_2000894_pn56	0.330079	2.94538e-08	1
metab_vams_post::vam_1044250_pn56	metab_vams_post::vam_2000894_pn56	0.329836	3.01393e-08	1
metab_infant::vam_2008919_pn34	metab_infant::vam_2012513_pn34	0.329589	1.99918e-08	1
metab_milk::rLC_neg_mtb_4741641_1421	metab_milk::rLC_neg_mtb_4801706_1421	0.32955	2.9365e-08	1
metab_infant::vam_1011758_pn56	metab_infant::vam_2001391_pn56	0.329174	3.38974e-08	1
metab_infant::vam_1041607_pn12	metab_infant::vam_2006912_pn12	0.329111	2.0913e-08	1
metab_infant::vam_1004055_pn12	metab_infant::vam_1023091_pn12	0.329075	2.09673e-08	1
metab_plasma::rLC_neg_mtb_4091474_pn12	metab_infant::vam_1001151_pn56	0.328458	0.00301168	1
metab_vams_post::vam_1012073_pn56	metab_vams_post::vam_2003571_pn56	0.328408	3.45474e-08	1
metab_infant::vam_2030112_pn12	metab_infant::vam_2039960_pn12	0.328367	2.24497e-08	1
metab_infant::vam_2011129_pn56	metab_infant::vam_2011729_pn56	0.328228	3.71152e-08	1
metab_infant::vam_1004554_pn12	metab_infant::vam_2039960_pn12	0.328042	2.32112e-08	1
metab_infant::vam_1023091_pn12	metab_infant::vam_2024055_pn12	0.327643	2.41856e-08	1
metab_vams_post::vam_1027659_pn56	metab_vams_post::vam_2003571_pn56	0.327523	3.75975e-08	1
metab_infant::vam_2009731_pn56	metab_infant::vam_2011729_pn56	0.32748	3.99028e-08	1
metab_infant::vam_2007339_pn34	metab_infant::vam_2021380_pn34	0.327318	2.49439e-08	1
metab_infant::vam_2033729_pn34	metab_infant::vam_2038292_pn34	0.326654	2.66353e-08	1
metab_milk::rLC_neg_mtb_1348891_pn34	metab_milk::rLC_pos_mtb_1209516_1421	0.32628	6.16906e-08	1
metab_vams_post::vam_2003571_pn56	metab_infant::vam_2003571_pn56	0.325859	4.90246e-08	1
milk::Cer.d18.2.24.1._pn34	metab_plasma::rLC_pos_mtb_9601066_pn12	0.325574	0.00328899	1
metab_vams_post::vam_1012073_pn56	metab_vams_post::vam_2000894_pn56	0.325378	4.61775e-08	1
metab_infant::vam_1029340_pn12	metab_infant::vam_1043363_pn12	0.325305	3.02812e-08	1
metab_infant::vam_1006527_pn12	metab_infant::vam_1033381_pn12	0.324995	3.12111e-08	1
metab_infant::vam_1006527_pn12	metab_infant::vam_1023252_pn12	0.324894	3.15082e-08	1
metab_infant::vam_1008679_pn34	metab_infant::vam_2012513_pn34	0.324686	3.21668e-08	1
metab_vams_post::vam_1000749_pn56	metab_vams_post::vam_2003571_pn56	0.324669	4.92587e-08	1
metab_vams_post::vam_1021203_pn56	metab_vams_post::vam_1027659_pn56	0.324592	4.95363e-08	1
metab_vams_post::vam_2003571_pn56	metab_infant::vam_1006711_pn56	0.324564	5.53578e-08	1
metab_infant::vam_2003279_pn34	metab_infant::vam_2021380_pn34	0.324155	3.38913e-08	1
metab_vams_post::vam_2039956_pn56	metab_infant::vam_2039956_pn56	0.324015	5.83266e-08	1
metab_infant::vam_1027659_pn56	metab_infant::vam_2006570_pn56	0.323695	5.70208e-08	1
metab_infant::vam_2005095_pn34	metab_infant::vam_2032915_pn34	0.323615	3.57365e-08	1
metab_infant::vam_2006912_pn12	metab_infant::vam_2033633_pn12	0.323469	3.6247e-08	1
metab_infant::vam_1043363_pn12	metab_infant::vam_2010737_pn12	0.32338	3.65024e-08	1
metab_milk::rLC_neg_mtb_4741641_1421	metab_milk::rLC_pos_mtb_2861005_1421	0.323192	5.37798e-08	1
metab_infant::vam_1009321_pn12	metab_infant::vam_1023091_pn12	0.322821	3.85431e-08	1
metab_infant::vam_1021160_pn12	metab_infant::vam_2030923_pn12	0.322815	3.85431e-08	1
metab_vams_post::vam_2011129_pn56	metab_infant::vam_2006570_pn56	0.322777	6.52899e-08	1
prot_dep::O94979_pn56	prot_dep::P51812_pn12	0.322731	0.000107159	1
metab_infant::vam_1011758_pn56	metab_infant::vam_1044250_pn56	0.322651	6.2886e-08	1
metab_milk::rLC_neg_mtb_5334294_pn12	metab_milk::rLC_neg_mtb_6419699_pn12	0.322453	3.23561e-08	1
metab_vams_post::vam_1042764_pn56	metab_vams_post::vam_1044250_pn56	0.322024	6.31748e-08	1
metab_infant::vam_1023252_pn12	metab_infant::vam_2030923_pn12	0.321807	4.26108e-08	1
metab_infant::vam_2016752_pn34	metab_infant::vam_2038292_pn34	0.321529	4.37081e-08	1
milk::X2.FL_pn12	metab_milk::rLC_neg_mtb_2705898_pn34	0.321429	5.42738e-08	1
metab_infant::vam_1044250_pn56	metab_infant::vam_2009731_pn56	0.321343	7.08903e-08	1
metab_infant::vam_1022465_pn34	metab_infant::vam_1030006_pn34	0.321336	4.45427e-08	1
metab_infant::vam_1011758_pn56	metab_infant::vam_2003571_pn56	0.321292	7.11256e-08	1
milk::Se_pn34	metab_milk::rLC_pos_mtb_4159213_pn34	0.321227	6.4579e-08	1
metab_infant::vam_1016797_pn12	metab_infant::vam_1023252_pn12	0.321207	4.50422e-08	1
metab_vams_post::vam_1015826_pn56	metab_infant::vam_2000894_pn56	0.320918	7.70822e-08	1
metab_plasma::rLC_neg_mtb_1117333_pn12	metab_infant::vam_2032139_pn12	0.320845	0.00357719	1
metab_vams_post::vam_1029523_pn56	metab_vams_post::vam_2001391_pn56	0.320556	7.22217e-08	1
metab_infant::vam_1038339_pn12	metab_infant::vam_2033633_pn12	0.320495	4.83211e-08	1
metab_infant::vam_2007339_pn34	metab_infant::vam_2009944_pn34	0.320464	4.84262e-08	1
metab_infant::vam_1006527_pn12	metab_infant::vam_1008025_pn12	0.320358	4.89018e-08	1
metab_vams_post::vam_1007189_pn56	metab_vams_post::vam_2009731_pn56	0.320092	7.53428e-08	1
metab_vams_post::vam_1044250_pn56	metab_vams_post::vam_2001391_pn56	0.320042	7.5647e-08	1
metab_infant::vam_2024038_pn12	metab_infant::vam_2032139_pn12	0.319943	5.07074e-08	1
metab_infant::vam_1008679_pn34	metab_infant::vam_2015571_pn34	0.319621	5.23598e-08	1
metab_infant::vam_1011553_pn56	metab_infant::vam_1012102_pn56	0.319395	8.42448e-08	1
metab_milk::rLC_neg_mtb_4741641_1421	metab_milk::rLC_pos_mtb_2988097_1421	0.319317	7.66249e-08	1
metab_infant::vam_1016289_pn34	metab_infant::vam_2012513_pn34	0.319167	5.46818e-08	1
metab_vams_post::vam_2006570_pn56	metab_infant::vam_1006711_pn56	0.319013	9.14967e-08	1
metab_infant::vam_1005685_pn56	metab_infant::vam_1012102_pn56	0.318992	8.7239e-08	1
metab_infant::vam_2006912_pn12	metab_infant::vam_2026897_pn12	0.318695	5.72086e-08	1
metab_vams_post::vam_1002045_pn56	metab_vams_post::vam_1012684_pn56	0.318667	8.55244e-08	1
metab_infant::vam_2004369_pn56	metab_infant::vam_2018595_pn56	0.318602	9.04039e-08	1
metab_milk::rLC_neg_mtb_1846883_1421	metab_milk::rLC_neg_mtb_1868950_pn12	0.318488	9.57297e-08	1
metab_vams_post::vam_1007189_pn56	metab_vams_post::vam_1021203_pn56	0.31845	8.72126e-08	1
metab_infant::vam_2006570_pn56	metab_infant::vam_2040533_pn56	0.31845	9.14967e-08	1
metab_infant::vam_1003267_pn12	metab_infant::vam_1021745_pn12	0.318445	5.85662e-08	1
metab_milk::rLC_neg_mtb_4313871_pn12	metab_milk::rLC_neg_mtb_4454625_pn12	0.318438	4.79534e-08	1
metab_infant::vam_1023091_pn12	metab_infant::vam_2024038_pn12	0.318394	5.88081e-08	1
metab_infant::vam_2009731_pn56	metab_infant::vam_2040533_pn56	0.318317	9.25216e-08	1
metab_milk::rLC_pos_mtb_10007784_pn12	metab_milk::rLC_pos_mtb_7258182_pn34	0.31819	7.32553e-08	1
metab_infant::vam_1038339_pn12	metab_infant::vam_2040409_pn12	0.318034	6.09513e-08	1
metab_vams_post::vam_1005685_pn56	metab_infant::vam_1024165_pn56	0.317563	1.04247e-07	1
metab_milk::rLC_neg_mtb_2068114_1421	metab_milk::rLC_neg_mtb_4851982_1421	0.316985	9.44353e-08	1
metab_milk::rLC_neg_mtb_1846883_1421	metab_milk::rLC_neg_mtb_2705898_pn34	0.316977	1.40026e-07	1
metab_infant::vam_1023091_pn12	metab_infant::vam_1041607_pn12	0.316467	7.06087e-08	1
metab_infant::vam_1006121_pn56	metab_infant::vam_1027659_pn56	0.316396	1.10405e-07	1
metab_infant::vam_1027659_pn56	metab_infant::vam_2000894_pn56	0.316267	1.11583e-07	1
metab_infant::vam_2032139_pn12	metab_infant::vam_2033516_pn12	0.316203	7.22217e-08	1
metab_milk::rLC_neg_mtb_6793455_pn34	metab_milk::rLC_pos_mtb_10040225_pn34	0.316071	8.44373e-08	1
metab_vams_post::vam_1015826_pn56	metab_infant::vam_1006711_pn56	0.315939	1.20331e-07	1
metab_infant::vam_1000105_pn12	metab_infant::vam_1004554_pn12	0.315842	7.4599e-08	1
metab_vams_post::vam_2000327_pn56	metab_vams_post::vam_2003571_pn56	0.31572	1.11583e-07	1
metab_infant::vam_1016797_pn12	metab_infant::vam_1023138_pn12	0.315566	7.64732e-08	1
metab_vams_post::vam_1012684_pn56	metab_vams_post::vam_2003220_pn56	0.315446	1.1425e-07	1
metab_vams_post::vam_2003571_pn56	metab_vams_post::vam_2011129_pn56	0.315197	1.16611e-07	1
metab_infant::vam_1012943_pn34	metab_infant::vam_1042620_pn34	0.315147	7.92854e-08	1
metab_infant::vam_2005361_pn34	metab_infant::vam_2009944_pn34	0.31511	7.94999e-08	1
metab_milk::rLC_neg_mtb_2705898_pn34	metab_milk::rLC_pos_mtb_1793772_1421	0.315053	1.64959e-07	1
metab_infant::vam_2024038_pn12	metab_infant::vam_2033516_pn12	0.314954	8.05975e-08	1
metab_vams_post::vam_1006711_pn56	metab_infant::vam_2011129_pn56	0.314806	1.32969e-07	1
metab_infant::vam_1004554_pn12	metab_infant::vam_2040057_pn12	0.314706	8.25569e-08	1
metab_milk::rLC_neg_mtb_2197266_pn12	metab_plasma::rLC_neg_mtb_3194811_pn12	0.314449	0.00386778	1
metab_milk::rLC_neg_mtb_1348891_pn34	metab_milk::rLC_pos_mtb_1181693_pn34	0.314428	9.77114e-08	1
metab_infant::vam_1012684_pn56	metab_infant::vam_2003571_pn56	0.314394	1.31573e-07	1
metab_vams_post::vam_1044250_pn56	metab_vams_post::vam_2000327_pn56	0.314285	1.26668e-07	1
metab_infant::vam_1006121_pn56	metab_infant::vam_1021203_pn56	0.314275	1.32849e-07	1
metab_milk::rLC_neg_mtb_4800097_1421	metab_milk::rLC_neg_mtb_4801706_1421	0.314237	1.20851e-07	1
metab_vams_post::vam_1029523_pn56	metab_infant::vam_1029523_pn56	0.314206	1.39876e-07	1
metab_infant::vam_1004554_pn12	metab_infant::vam_1035179_pn12	0.314127	8.71662e-08	1
metab_infant::vam_1003801_pn12	metab_infant::vam_1008025_pn12	0.313737	9.02872e-08	1
metab_vams_post::vam_2002382_pn56	metab_infant::vam_2002382_pn56	0.313707	1.45831e-07	1
metab_milk::rLC_neg_mtb_4800097_1421	metab_milk::rLC_pos_mtb_2861005_1421	0.313534	1.29063e-07	1
metab_plasma::rLC_neg_mtb_4091474_pn12	metab_infant::vam_2030923_pn12	0.313482	0.00443331	1
metab_vams_post::vam_1027659_pn56	metab_vams_post::vam_2006570_pn56	0.313414	1.36719e-07	1
milk::TG.22.6_34.1._pn12	metab_milk::rLC_pos_mtb_4813295_pn12	0.313408	7.66249e-08	1
metab_milk::rLC_neg_mtb_1846872_1421	metab_milk::rLC_neg_mtb_1868950_pn12	0.313026	1.552e-07	1
metab_infant::vam_1009321_pn12	metab_infant::vam_2026897_pn12	0.312929	9.68206e-08	1
milk::Cer.d18.2.24.1._pn34	milk::TG.16.0_40.7._pn12	0.31277	1.19237e-07	1
metab_vams_post::vam_2007285_pn56	metab_infant::vam_2006570_pn56	0.312614	1.60434e-07	1
metab_infant::vam_1006527_pn12	metab_infant::vam_2033516_pn12	0.312497	1.00801e-07	1
metab_infant::vam_1015826_pn56	metab_infant::vam_1027659_pn56	0.312373	1.56487e-07	1
metab_infant::vam_1001604_pn34	metab_infant::vam_1038175_pn34	0.312231	1.03423e-07	1
metab_vams_post::vam_1011758_pn56	metab_vams_post::vam_1029523_pn56	0.312147	1.52292e-07	1
metab_infant::vam_1009043_pn12	metab_infant::vam_1021160_pn12	0.311975	1.0589e-07	1
metab_plasma::rLC_neg_mtb_4091474_pn12	metab_infant::vam_1004554_pn12	0.311653	0.00467974	1
metab_vams_post::vam_1000749_pn56	metab_vams_post::vam_1015826_pn56	0.311563	1.60098e-07	1
metab_infant::vam_2030112_pn12	metab_infant::vam_2033633_pn12	0.311542	1.10405e-07	1
metab_vams_post::vam_1007189_pn56	metab_vams_post::vam_1015826_pn56	0.311522	1.60434e-07	1
metab_milk::rLC_neg_mtb_2094253_1421	metab_milk::rLC_neg_mtb_2705898_pn34	0.311479	2.25221e-07	1
metab_milk::rLC_neg_mtb_5040322_pn12	metab_milk::rLC_neg_mtb_5334294_pn12	0.311367	9.22891e-08	1
metab_infant::vam_1038339_pn12	metab_infant::vam_2037589_pn12	0.311248	1.133e-07	1
metab_infant::vam_1007266_pn34	metab_infant::vam_2038292_pn34	0.311208	1.13634e-07	1
metab_infant::vam_2019477_pn34	metab_infant::vam_2030437_pn34	0.311107	1.14554e-07	1
metab_milk::rLC_neg_mtb_5040322_pn12	prot_dep::P13591_pn12	0.310971	0.000149331	1
metab_infant::vam_1001604_pn34	metab_infant::vam_1022465_pn34	0.310923	1.16443e-07	1
metab_infant::vam_1038339_pn12	metab_infant::vam_2041308_pn12	0.310768	1.18013e-07	1
metab_infant::vam_1021203_pn56	metab_infant::vam_2011729_pn56	0.310496	1.83896e-07	1
metab_milk::rLC_pos_mtb_2861005_1421	metab_milk::rLC_pos_mtb_2988097_1421	0.310427	1.68159e-07	1
prot_dep::Q8IW92_pn12	prot_dep::Q96N11_pn56	0.31038	0.000201384	1
milk::TG.16.0_40.7._pn12	metab_plasma::rLC_neg_mtb_3606887_pn12	0.310293	0.00437633	1
milk::As_pn12	metab_plasma::rLC_neg_mtb_3606887_pn12	0.310149	0.00606445	1
metab_vams_post::vam_1029523_pn56	metab_vams_post::vam_2003571_pn56	0.310132	1.80931e-07	1
metab_milk::rLC_neg_mtb_1787234_pn34	metab_milk::rLC_pos_mtb_1756040_pn12	0.310082	1.5113e-07	1
metab_plasma::rLC_neg_mtb_4349625_pn12	metab_infant::vam_2008190_pn34	0.310042	0.00440264	1
metab_vams_post::vam_1044250_pn56	metab_vams_post::vam_2016288_pn56	0.309763	1.86967e-07	1
metab_milk::rLC_neg_mtb_1851694_1421	metab_milk::rLC_neg_mtb_4741641_1421	0.309693	1.79531e-07	1
metab_infant::vam_2003623_pn12	metab_infant::vam_2024038_pn12	0.3096	1.31225e-07	1
metab_infant::vam_2028637_pn34	metab_infant::vam_2038292_pn34	0.309526	1.31929e-07	1
metab_infant::vam_1027659_pn56	metab_infant::vam_2011729_pn56	0.309386	2.02768e-07	1
metab_infant::vam_1009089_pn56	metab_infant::vam_1029523_pn56	0.309121	2.07531e-07	1
metab_plasma::rLC_neg_mtb_4091474_pn12	metab_infant::vam_2006912_pn12	0.309033	0.00504729	1
metab_infant::vam_2037589_pn12	metab_infant::vam_2040057_pn12	0.309023	1.37985e-07	1
metab_infant::vam_2021380_pn34	metab_infant::vam_2033729_pn34	0.308954	1.38782e-07	1
metab_infant::vam_1016289_pn34	metab_infant::vam_2028637_pn34	0.308915	1.38924e-07	1
metab_infant::vam_2024038_pn12	metab_infant::vam_2030112_pn12	0.308766	1.4056e-07	1
metab_infant::vam_1016289_pn34	metab_infant::vam_2033729_pn34	0.308714	1.41152e-07	1
metab_infant::vam_1023091_pn12	metab_infant::vam_2037589_pn12	0.308575	1.42828e-07	1
metab_infant::vam_1021203_pn56	metab_infant::vam_1029523_pn56	0.308569	2.17779e-07	1
prot_dep::P51812_pn12	prot_dep::Q96N11_pn56	0.308517	0.000220139	1
metab_infant::vam_1017889_pn12	metab_infant::vam_2030923_pn12	0.308368	1.45637e-07	1
metab_plasma::rLC_neg_mtb_3606887_pn12	metab_infant::vam_2025775_pn12	0.307882	0.00521388	1
metab_infant::vam_1007266_pn34	metab_infant::vam_2032136_pn34	0.30782	1.53128e-07	1
metab_vams_post::vam_1006711_pn56	metab_vams_post::vam_1029523_pn56	0.307675	2.2512e-07	1
metab_infant::vam_1016111_pn34	metab_infant::vam_1022465_pn34	0.307537	1.5684e-07	1
metab_vams_post::vam_1001875_pn56	metab_vams_post::vam_2003571_pn56	0.307142	2.35786e-07	1
metab_infant::vam_1020317_pn34	metab_infant::vam_2017110_pn34	0.307104	1.62718e-07	1
metab_milk::rLC_neg_mtb_6793455_pn34	metab_milk::rLC_pos_mtb_7258182_pn34	0.307084	1.87034e-07	1
metab_vams_post::vam_2000894_pn56	metab_vams_post::vam_2040533_pn56	0.307078	2.37013e-07	1
metab_infant::vam_1035179_pn12	metab_infant::vam_2028656_pn12	0.307039	1.63604e-07	1
metab_vams_post::vam_1006711_pn56	metab_vams_post::vam_1021203_pn56	0.306988	2.38671e-07	1
metab_plasma::rLC_pos_mtb_3523177_pn12	metab_vams_post::vam_2003571_pn56	0.306957	0.00535366	1
metab_infant::vam_1038339_pn12	metab_infant::vam_2039534_pn12	0.306937	1.64959e-07	1
metab_infant::vam_1006552_pn34	metab_infant::vam_2005095_pn34	0.306831	1.665e-07	1
metab_infant::vam_1006711_pn56	metab_infant::vam_2000327_pn56	0.306519	2.60664e-07	1
metab_milk::rLC_neg_mtb_1348891_pn34	metab_milk::rLC_neg_mtb_1685649_1421	0.306262	3.5261e-07	1
metab_vams_post::vam_1044250_pn56	metab_vams_post::vam_2003571_pn56	0.30624	2.54841e-07	1
metab_infant::vam_1008665_pn12	metab_infant::vam_2026897_pn12	0.306217	1.76322e-07	1
metab_infant::vam_1006527_pn12	metab_infant::vam_1021160_pn12	0.306157	1.77028e-07	1
metab_infant::vam_2015937_pn12	metab_infant::vam_2030112_pn12	0.305916	1.80733e-07	1
metab_milk::rLC_neg_mtb_2705898_pn34	metab_plasma::rLC_neg_mtb_4091474_pn12	0.305907	0.00581642	1
metab_milk::rLC_neg_mtb_1353273_1421	metab_milk::rLC_pos_mtb_1793772_1421	0.305855	2.51978e-07	1
metab_vams_post::vam_1029523_pn56	metab_vams_post::vam_2000327_pn56	0.305804	2.64912e-07	1
metab_vams_post::vam_1029523_pn56	metab_vams_post::vam_2009731_pn56	0.305761	2.6576e-07	1
metab_vams_post::vam_1015826_pn56	metab_vams_post::vam_2040533_pn56	0.305738	2.66083e-07	1
metab_infant::vam_1011758_pn56	metab_infant::vam_2011729_pn56	0.305649	2.80257e-07	1
metab_infant::vam_2005961_pn56	metab_infant::vam_2008011_pn56	0.305546	2.82737e-07	1
metab_milk::rLC_pos_mtb_7258182_pn34	metab_milk::rLC_pos_mtb_9970005_pn12	0.305538	2.25152e-07	1
metab_infant::vam_1038339_pn12	metab_infant::vam_2006912_pn12	0.305483	1.87467e-07	1
metab_vams_post::vam_1029523_pn56	metab_vams_post::vam_2007285_pn56	0.30525	2.7711e-07	1
metab_infant::vam_1042764_pn56	metab_infant::vam_2000894_pn56	0.305072	2.94653e-07	1
metab_infant::vam_2030923_pn12	metab_infant::vam_2040057_pn12	0.305002	1.96113e-07	1
metab_milk::rLC_neg_mtb_1353273_1421	metab_milk::rLC_neg_mtb_1596675_pn12	0.304824	3.15534e-07	1
metab_vams_post::vam_1012684_pn56	metab_infant::vam_1012684_pn56	0.30479	3.16247e-07	1
metab_infant::vam_1006527_pn12	metab_infant::vam_1043363_pn12	0.304621	2.02768e-07	1
milk::Cer.d18.2.24.1._pn34	milk::TG.22.6_34.1._pn12	0.30457	2.45291e-07	1
metab_milk::rLC_neg_mtb_7693842_pn12	metab_plasma::rLC_neg_mtb_3569790_pn12	0.304563	0.00516465	1
metab_milk::rLC_neg_mtb_1348891_pn34	metab_milk::rLC_pos_mtb_1554380_1421	0.304245	4.20463e-07	1
metab_infant::vam_2008919_pn34	metab_infant::vam_2031268_pn34	0.304126	2.11774e-07	1
metab_milk::rLC_neg_mtb_4655971_1421	metab_milk::rLC_neg_mtb_4802516_1421	0.303983	2.95067e-07	1
metab_infant::vam_1044250_pn56	metab_infant::vam_2016288_pn56	0.30366	3.32665e-07	1
metab_milk::rLC_neg_mtb_1353273_1421	metab_milk::rLC_neg_mtb_1353454_pn34	0.30349	4.49145e-07	1
metab_plasma::rLC_neg_mtb_4091474_pn12	metab_infant::vam_1043363_pn12	0.303342	0.00593215	1
metab_vams_post::vam_2011129_pn56	metab_infant::vam_1006711_pn56	0.303306	3.6024e-07	1
metab_vams_post::vam_1011758_pn56	metab_vams_post::vam_1044250_pn56	0.303214	3.30299e-07	1
milk::LSTb_pn34	metab_milk::rLC_neg_mtb_4313871_pn12	0.303133	2.7711e-07	1
metab_infant::vam_1004153_pn34	metab_infant::vam_1016703_pn34	0.303095	2.3273e-07	1
metab_infant::vam_1006527_pn12	metab_infant::vam_1008665_pn12	0.303047	2.33611e-07	1
metab_plasma::rLC_neg_mtb_4091474_pn12	metab_vams_post::vam_2013375_pn56	0.303004	0.00598604	1
metab_infant::vam_2000327_pn56	metab_infant::vam_2009731_pn56	0.30289	3.56631e-07	1
metab_vams_post::vam_2001391_pn56	metab_vams_post::vam_2004369_pn56	0.302627	3.48447e-07	1
metab_infant::vam_1016296_pn56	metab_infant::vam_2011729_pn56	0.302426	3.71651e-07	1
metab_infant::vam_1044250_pn56	metab_infant::vam_2011729_pn56	0.302421	3.71651e-07	1
metab_infant::vam_1006527_pn12	metab_infant::vam_2024055_pn12	0.302399	2.47335e-07	1
metab_vams_post::vam_2006570_pn56	metab_infant::vam_2007285_pn56	0.30211	4.00295e-07	1
metab_milk::rLC_neg_mtb_1975961_pn34	metab_milk::rLC_pos_mtb_3136537_pn34	0.301872	2.9526e-07	1
metab_vams_post::vam_2000894_pn56	metab_vams_post::vam_2011129_pn56	0.30177	3.75584e-07	1
metab_infant::vam_1021203_pn56	metab_infant::vam_2000327_pn56	0.301312	4.0965e-07	1
metab_milk::rLC_pos_mtb_7258182_pn12	metab_milk::rLC_pos_mtb_7258182_pn34	0.301219	3.27391e-07	1
metab_milk::rLC_neg_mtb_1927807_pn34	metab_milk::rLC_neg_mtb_4120785_pn34	0.301185	3.14367e-07	1
metab_vams_post::vam_1000749_pn56	metab_vams_post::vam_1001875_pn56	0.301089	3.99227e-07	1
metab_infant::vam_2009944_pn34	metab_infant::vam_2038292_pn34	0.30108	2.7711e-07	1
metab_plasma::rLC_pos_mtb_636920_tri3	prot_naive::A0A0A0MS14_pn12	0.300995	0.000272976	1
metab_milk::rLC_neg_mtb_2108943_pn34	metab_milk::rLC_neg_mtb_4711306_pn34	0.300921	3.21408e-07	1
metab_vams_post::vam_2007285_pn56	metab_infant::vam_1006711_pn56	0.300885	4.46187e-07	1
metab_infant::vam_1038175_pn34	metab_infant::vam_2017110_pn34	0.300575	2.89429e-07	1
metab_infant::vam_2007586_pn12	metab_infant::vam_2033633_pn12	0.300499	2.91258e-07	1
metab_vams_post::vam_1011758_pn56	metab_vams_post::vam_2004369_pn56	0.300205	4.31656e-07	1
metab_infant::vam_1011758_pn56	metab_infant::vam_2000894_pn56	0.300142	4.54358e-07	1
metab_infant::vam_2008919_pn34	metab_infant::vam_2032136_pn34	0.300103	3.01441e-07	1
metab_infant::vam_1043363_pn12	metab_infant::vam_2030923_pn12	0.300079	3.01856e-07	1
metab_infant::vam_1016296_pn56	metab_infant::vam_1029523_pn56	0.300019	4.59146e-07	1
metab_milk::rLC_neg_mtb_4342415_1421	prot_dep::P55058_pn56	-0.300165	0.000469956	1
prot_dep::O94979_pn12	prot_dep::Q96N11_pn56	-0.300575	0.000323787	1
metab_milk::rLC_neg_mtb_1685649_1421	metab_milk::rLC_neg_mtb_4313871_pn12	-0.300894	4.46187e-07	1
prot_dep::P78527_pn12	prot_naive::A0A0A0MT89_pn12	-0.30098	0.000247293	1
metab_infant::vam_1016289_pn34	metab_infant::vam_2017110_pn34	-0.301148	2.75683e-07	1
metab_vams_post::vam_1000894_pn56	metab_vams_post::vam_2003571_pn56	-0.301326	3.9084e-07	1
metab_plasma::rLC_pos_mtb_5060798_pn12	metab_infant::vam_2019477_pn34	-0.301331	0.00566735	1
metab_plasma::rLC_pos_mtb_5060798_pn12	metab_infant::vam_2007339_pn34	-0.301352	0.00566735	1
metab_milk::rLC_neg_mtb_4851982_1421	metab_infant::vam_1021745_pn12	-0.301396	5.16103e-07	1
metab_infant::vam_1000894_pn56	metab_infant::vam_2000327_pn56	-0.301399	4.06728e-07	1
metab_infant::vam_1022465_pn34	metab_infant::vam_2007339_pn34	-0.301485	2.67619e-07	1
metab_milk::rLC_neg_mtb_1927807_pn34	metab_plasma::rLC_neg_mtb_1117333_pn12	-0.301571	0.00656362	1
metab_infant::vam_1042620_pn34	metab_infant::vam_2003218_pn34	-0.302138	2.52929e-07	1
metab_infant::vam_1005311_pn12	metab_infant::vam_2004073_pn12	-0.302162	2.5257e-07	1
metab_milk::rLC_neg_mtb_2068114_1421	metab_plasma::rLC_neg_mtb_3194811_pn12	-0.302482	0.010351	1
metab_infant::vam_1033642_pn12	metab_infant::vam_2026897_pn12	-0.302787	2.38671e-07	1
metab_milk::rLC_neg_mtb_1846883_1421	metab_milk::rLC_neg_mtb_4342415_1421	-0.303003	3.21408e-07	1
metab_milk::rLC_pos_mtb_5709_pn34	metab_plasma::rLC_neg_mtb_2188685_pn12	-0.304173	0.00609597	1
prot_dep::P78527_pn12	prot_naive::A0A0A0MS15_pn12	-0.30433	0.000209472	1
metab_infant::vam_1033642_pn12	metab_infant::vam_2032139_pn12	-0.304732	2.00964e-07	1
metab_infant::vam_1009085_pn34	metab_infant::vam_2024224_pn34	-0.304756	2.00678e-07	1
prot_naive::P49908_pn12	prot_naive::Q9N2J8_pn12	-0.304865	0.000204188	1
metab_infant::vam_2003218_pn34	metab_infant::vam_2017110_pn34	-0.305688	1.84275e-07	1
metab_infant::vam_1009085_pn34	metab_infant::vam_1035969_pn34	-0.306057	1.786e-07	1
prot_naive::P49908_pn12	prot_naive::Q08257_pn56	-0.306239	0.000246336	1
metab_infant::vam_2026897_pn12	prot_naive::P49908_pn12	-0.306756	0.000216487	1
metab_milk::rLC_neg_mtb_7155692_pn12	metab_plasma::rLC_neg_mtb_1117333_pn12	-0.306893	0.00482753	1
milk::LSTb_pn34	metab_milk::rLC_neg_mtb_1846883_1421	-0.307151	3.2607e-07	1
metab_infant::vam_1012943_pn34	metab_infant::vam_2008919_pn34	-0.307209	1.61197e-07	1
metab_vams_post::vam_1000894_pn56	metab_vams_post::vam_2006570_pn56	-0.308304	2.12339e-07	1
metab_milk::rLC_neg_mtb_2149315_1421	metab_milk::rLC_pos_mtb_1209516_1421	-0.308871	1.92918e-07	1
metab_milk::rLC_neg_mtb_1846872_1421	metab_milk::rLC_neg_mtb_4313871_pn12	-0.309453	2.11369e-07	1
metab_plasma::rLC_neg_mtb_4349625_pn12	metab_infant::vam_2039878_pn12	-0.309643	0.00496076	1
metab_infant::vam_1000105_pn12	metab_infant::vam_1033642_pn12	-0.309716	1.29859e-07	1
metab_infant::vam_1001604_pn34	metab_infant::vam_2015571_pn34	-0.309788	1.29063e-07	1
milk::LSTb_pn34	metab_milk::rLC_neg_mtb_1620620_pn34	-0.310193	1.42437e-07	1
metab_plasma::rLC_neg_mtb_3569790_pn12	metab_infant::vam_1015139_pn34	-0.311868	0.00417739	1
metab_plasma::rLC_pos_mtb_5060798_pn12	metab_infant::vam_2016752_pn34	-0.312497	0.00410419	1
metab_milk::rLC_neg_mtb_4313871_pn12	metab_milk::rLC_pos_mtb_1209516_1421	-0.312709	1.59417e-07	1
metab_plasma::rLC_neg_mtb_4496106_pn12	metab_infant::vam_1000931_pn12	-0.313618	0.00441886	1
metab_infant::vam_1012943_pn34	metab_infant::vam_2007339_pn34	-0.313674	9.06687e-08	1
metab_infant::vam_1022465_pn34	metab_infant::vam_2019477_pn34	-0.313787	8.99243e-08	1
metab_vams_post::vam_2008011_pn56	metab_infant::vam_1006121_pn56	-0.314307	1.38782e-07	1
milk::LSTb_pn34	metab_milk::rLC_pos_mtb_1209516_1421	-0.314688	1.7035e-07	1
metab_infant::vam_2017110_pn34	metab_infant::vam_2028637_pn34	-0.315164	7.9233e-08	1
metab_infant::vam_1003801_pn12	metab_infant::vam_1033642_pn12	-0.316363	7.11256e-08	1
milk::Corynebacterium.258_pn12	prot_dep::P55058_pn56	-0.316397	0.000148608	1
metab_infant::vam_1000894_pn56	metab_infant::vam_2003571_pn56	-0.317515	9.94541e-08	1
metab_infant::vam_1000894_pn56	metab_infant::vam_1044250_pn56	-0.318176	9.37249e-08	1
metab_plasma::rLC_pos_mtb_5060798_pn12	metab_infant::vam_1023091_pn12	-0.319219	0.00375455	1
metab_vams_post::vam_1000894_pn56	metab_vams_post::vam_1044250_pn56	-0.320419	7.31467e-08	1
metab_milk::rLC_neg_mtb_1596675_pn12	prot_dep::O94979_pn56	-0.320741	0.00011881	1
metab_vams_post::vam_1006121_pn56	metab_vams_post::vam_2008011_pn56	-0.320941	6.99285e-08	1
metab_milk::rLC_neg_mtb_1846872_1421	metab_milk::rLC_neg_mtb_4342415_1421	-0.320956	6.61577e-08	1
metab_milk::rLC_neg_mtb_5069646_1421	metab_milk::rLC_neg_mtb_5139140_1421	-0.321301	6.41694e-08	1
metab_milk::rLC_neg_mtb_1596675_pn12	metab_milk::rLC_neg_mtb_4342415_1421	-0.322153	6.93675e-08	1
metab_infant::vam_1042620_pn34	metab_infant::vam_2021380_pn34	-0.322395	4.01294e-08	1
metab_infant::vam_2015571_pn34	metab_infant::vam_2017110_pn34	-0.322459	3.99098e-08	1
metab_plasma::rLC_pos_mtb_5060798_pn12	metab_infant::vam_2039878_pn12	-0.323261	0.0033219	1
milk::X2.FL_pn12	metab_milk::rLC_neg_mtb_4313871_pn12	-0.324964	2.53772e-08	1
metab_milk::rLC_neg_mtb_1596675_pn12	metab_milk::rLC_neg_mtb_2072948_1421	-0.325869	4.90246e-08	1
metab_plasma::rLC_pos_mtb_5060798_pn12	metab_infant::vam_1004554_pn12	-0.325903	0.00306375	1
metab_vams_post::vam_2006570_pn56	metab_vams_post::vam_2008011_pn56	-0.326077	4.32303e-08	1
metab_plasma::rLC_pos_mtb_3523177_pn12	metab_infant::vam_2023301_pn34	-0.326258	0.00268748	1
metab_plasma::rLC_neg_mtb_3569790_pn12	metab_plasma::rLC_neg_mtb_3606887_pn12	-0.326519	0.00266725	1
metab_plasma::rLC_neg_mtb_4349625_pn12	metab_infant::vam_1009321_pn12	-0.326829	0.00298082	1
metab_milk::rLC_neg_mtb_2149315_1421	prot_dep::Q8IW92_pn12	-0.327235	0.000101163	1
metab_infant::vam_1033642_pn12	metab_infant::vam_2041308_pn12	-0.328434	2.2321e-08	1
metab_milk::rLC_pos_mtb_7258182_pn12	metab_plasma::rLC_neg_mtb_4349625_pn12	-0.329058	0.00245911	1
metab_infant::vam_1001604_pn34	metab_infant::vam_2008919_pn34	-0.329458	2.02234e-08	1
metab_vams_post::vam_2008011_pn56	metab_vams_post::vam_2011129_pn56	-0.329894	2.99919e-08	1
prot_dep::P78527_pn12	prot_naive::A0A0B4J1V2_pn12	-0.33033	5.29133e-05	1
prot_dep::O94979_pn12	prot_naive::A0A0A0MS15_pn12	-0.330802	5.1626e-05	1
metab_infant::vam_2009944_pn34	metab_infant::vam_2017110_pn34	-0.331115	1.73113e-08	1
metab_milk::rLC_neg_mtb_2072948_1421	metab_milk::rLC_pos_mtb_1793772_1421	-0.331512	2.43122e-08	1
metab_infant::vam_1007266_pn34	metab_infant::vam_1042620_pn34	-0.332148	1.56792e-08	1
metab_infant::vam_1016111_pn34	metab_infant::vam_2016752_pn34	-0.332642	1.49394e-08	1
prot_dep::O94979_pn12	prot_dep::Q8IW92_pn12	-0.333144	4.53908e-05	1
metab_vams_post::vam_1000894_pn56	metab_vams_post::vam_1029523_pn56	-0.333365	2.1431e-08	1
metab_plasma::rLC_pos_mtb_5060798_pn12	metab_infant::vam_2015571_pn34	-0.333634	0.0021209	1
metab_infant::vam_1009085_pn34	metab_infant::vam_2016752_pn34	-0.334173	1.28332e-08	1
metab_infant::vam_1011947_pn56	metab_infant::vam_2005347_pn56	-0.33526	1.89229e-08	1
metab_infant::vam_1022465_pn34	metab_infant::vam_2008919_pn34	-0.335548	1.12477e-08	1
milk::X2.FL_pn12	metab_milk::rLC_neg_mtb_4342415_1421	-0.335561	1.94713e-08	1
metab_milk::rLC_neg_mtb_4313871_pn12	metab_milk::rLC_pos_mtb_1181693_pn34	-0.33703	1.21349e-08	1
metab_infant::vam_1001604_pn34	metab_infant::vam_2033729_pn34	-0.337113	9.66326e-09	1
metab_infant::vam_2006570_pn56	metab_infant::vam_2008011_pn56	-0.337799	1.49394e-08	1
metab_plasma::rLC_pos_mtb_636920_tri3	prot_dep::Q14126_pn12	-0.338549	3.80194e-05	1
metab_infant::vam_1033642_pn12	metab_infant::vam_2037589_pn12	-0.339231	7.86877e-09	1
metab_milk::rLC_neg_mtb_1620620_pn34	metab_milk::rLC_neg_mtb_2072948_1421	-0.33924	1.82088e-08	1
metab_milk::rLC_neg_mtb_5770650_1421	metab_plasma::rLC_neg_mtb_4349625_pn12	-0.341147	0.00367805	1
prot_dep::O94979_pn56	prot_dep::P78527_pn12	-0.342499	3.70021e-05	1
metab_infant::vam_1009085_pn34	metab_infant::vam_2007339_pn34	-0.342676	5.57334e-09	1
metab_infant::vam_1020134_pn34	metab_infant::vam_2021380_pn34	-0.343776	4.97115e-09	1
metab_infant::vam_1007266_pn34	metab_infant::vam_1012943_pn34	-0.344142	4.78853e-09	1
metab_plasma::rLC_neg_mtb_3569790_pn12	metab_infant::vam_2024513_pn12	-0.344693	0.0016859	1
metab_plasma::rLC_neg_mtb_1186728_pn12	metab_plasma::rLC_neg_mtb_3569790_pn12	-0.344927	0.00146156	1
metab_infant::vam_1022465_pn34	metab_infant::vam_2033729_pn34	-0.345429	4.18914e-09	1
prot_dep::Q14126_pn12	prot_dep::Q8IZF2_pn12	-0.346855	2.07033e-05	1
metab_vams_post::vam_1044250_pn56	metab_vams_post::vam_2031012_pn56	-0.347142	5.69189e-09	1
metab_infant::vam_2005347_pn56	metab_infant::vam_2005961_pn56	-0.349313	4.85059e-09	1
metab_plasma::rLC_neg_mtb_4091474_pn12	metab_infant::vam_1000021_pn12	-0.34939	0.0014444	1
metab_milk::rLC_neg_mtb_1620620_pn34	metab_milk::rLC_neg_mtb_4342415_1421	-0.350978	5.9179e-09	1
prot_dep::Q14126_pn12	prot_naive::A0A0A0MS15_pn12	-0.354436	1.31947e-05	1
prot_dep::O94979_pn12	prot_naive::A0A0B4J1V2_pn12	-0.355306	1.25278e-05	1
milk::LSTc_1421	metab_milk::rLC_neg_mtb_2036504_1421	-0.356603	1.99447e-09	1
metab_infant::vam_1016111_pn34	metab_infant::vam_2003218_pn34	-0.357328	1.16093e-09	1
metab_infant::vam_1008665_pn12	metab_infant::vam_1033642_pn12	-0.357853	1.09643e-09	1
prot_dep::P78527_pn12	prot_naive::A0A0A0MS14_pn12	-0.358003	1.06373e-05	1
metab_infant::vam_1033642_pn12	metab_infant::vam_2033516_pn12	-0.358164	1.06192e-09	1
metab_milk::rLC_neg_mtb_4851982_1421	metab_milk::rLC_neg_mtb_5069646_1421	-0.358243	1.66696e-09	1
milk::LSTb_pn34	metab_milk::rLC_neg_mtb_2197266_pn12	-0.358371	1.35021e-09	1
metab_plasma::rLC_neg_mtb_1186728_pn12	metab_vams_post::vam_2004369_pn56	-0.358491	0.00105894	1
milk::TG.16.1_34.1._pn12	metab_plasma::rLC_pos_mtb_5060798_pn12	-0.358591	0.000911101	1
metab_infant::vam_1033642_pn12	metab_infant::vam_2030112_pn12	-0.358667	1.00536e-09	1
metab_infant::vam_1042620_pn34	metab_infant::vam_2016752_pn34	-0.359673	8.99471e-10	1
milk::LSTb_pn34	metab_milk::rLC_neg_mtb_1787234_pn34	-0.360849	9.65893e-10	1
metab_infant::vam_1016111_pn34	metab_infant::vam_2019477_pn34	-0.361272	7.55535e-10	1
metab_milk::rLC_neg_mtb_5461236_pn12	metab_plasma::rLC_neg_mtb_3569790_pn12	-0.362138	0.000804758	1
metab_infant::vam_1033642_pn12	metab_infant::vam_2033633_pn12	-0.362662	6.47092e-10	1
metab_infant::vam_1006552_pn34	metab_infant::vam_1016111_pn34	-0.365817	4.55727e-10	1
metab_infant::vam_1042620_pn34	metab_infant::vam_2033729_pn34	-0.365976	4.50008e-10	1
metab_infant::vam_1016111_pn34	metab_infant::vam_1035969_pn34	-0.366545	4.21406e-10	1
metab_plasma::rLC_neg_mtb_4349625_pn12	metab_infant::vam_2004030_pn56	-0.368143	0.000816958	1
metab_plasma::rLC_pos_mtb_636920_tri3	prot_dep::O94979_pn12	-0.368976	6.25456e-06	1
metab_infant::vam_1042620_pn34	metab_infant::vam_2019477_pn34	-0.369127	3.14255e-10	1
metab_milk::rLC_neg_mtb_4915842_pn12	metab_milk::rLC_neg_mtb_5334294_pn12	-0.369971	2.17071e-10	1
metab_infant::vam_1016289_pn34	metab_infant::vam_1042620_pn34	-0.370568	2.68973e-10	1
milk::LSTb_pn34	metab_milk::rLC_neg_mtb_1353454_pn34	-0.372334	2.70864e-10	1
metab_vams_post::vam_1015826_pn56	metab_vams_post::vam_2008011_pn56	-0.372775	3.63973e-10	1
metab_milk::rLC_neg_mtb_1846872_1421	metab_milk::rLC_neg_mtb_2072948_1421	-0.373068	3.2819e-10	1
metab_infant::vam_1033642_pn12	metab_infant::vam_2039960_pn12	-0.374281	1.74968e-10	1
metab_infant::vam_1033642_pn12	metab_infant::vam_2024038_pn12	-0.376026	1.42186e-10	1
metab_infant::vam_1023091_pn12	metab_infant::vam_1033642_pn12	-0.37668	1.31696e-10	1
metab_infant::vam_1033642_pn12	metab_infant::vam_2030923_pn12	-0.376908	1.28453e-10	1
prot_dep::P13591_pn12	prot_dep::Q8IZF2_pn12	-0.38059	2.53119e-06	1
metab_milk::rLC_neg_mtb_4342415_1421	metab_milk::rLC_pos_mtb_1793772_1421	-0.381392	1.27796e-10	1
prot_dep::P78527_pn12	prot_naive::Q9N2J8_pn12	-0.38168	2.3591e-06	1
metab_infant::vam_1009085_pn34	metab_infant::vam_2008919_pn34	-0.382695	6.67621e-11	1
metab_vams_post::vam_1000894_pn56	metab_vams_post::vam_1021203_pn56	-0.386047	8.18917e-11	1
metab_infant::vam_1033642_pn12	metab_infant::vam_1038339_pn12	-0.386269	4.2938e-11	1
prot_dep::P02743_pn56	prot_dep::Q8NHQ9_pn56	-0.3866	2.37617e-06	1
prot_dep::O94979_pn12	prot_naive::Q9N2J8_pn12	-0.38688	1.66768e-06	1
metab_milk::rLC_neg_mtb_4655971_1421	metab_plasma::rLC_neg_mtb_4349625_pn12	-0.389604	0.000820491	1
metab_milk::rLC_neg_mtb_1596675_pn12	metab_milk::rLC_neg_mtb_4313871_pn12	-0.389974	2.00008e-11	1
metab_milk::rLC_neg_mtb_1846883_1421	metab_milk::rLC_neg_mtb_2072948_1421	-0.392798	3.38832e-11	1
prot_dep::P78527_pn12	prot_dep::Q8IZF2_pn12	-0.393013	1.10102e-06	1
metab_infant::vam_1033642_pn12	metab_infant::vam_2003623_pn12	-0.393136	1.85492e-11	1
metab_plasma::rLC_neg_mtb_3569790_pn12	metab_plasma::rLC_pos_mtb_1693385_pn12	-0.398178	0.000204407	1
prot_dep::O94979_pn12	prot_naive::A0A0A0MT89_pn12	-0.398756	7.40094e-07	1
milk::LSTc_1421	metab_milk::rLC_neg_mtb_2149315_1421	-0.399128	1.55703e-11	1
prot_dep::Q14126_pn12	prot_naive::A0A0A0MT89_pn12	-0.400303	6.64411e-07	1
metab_milk::rLC_neg_mtb_1353454_pn34	metab_milk::rLC_neg_mtb_4313871_pn12	-0.402101	8.30031e-12	1
prot_dep::O94979_pn12	prot_naive::A0A0A0MS14_pn12	-0.402216	5.80869e-07	1
metab_milk::rLC_neg_mtb_4313871_pn12	metab_milk::rLC_pos_mtb_1793772_1421	-0.403451	1.16328e-11	1
metab_vams_post::vam_2004369_pn56	metab_vams_post::vam_2005961_pn56	-0.410135	4.22203e-12	1
metab_infant::vam_1007266_pn34	metab_infant::vam_1016111_pn34	-0.410386	2.00142e-12	1
milk::LSTc_1421	metab_milk::rLC_pos_mtb_1582912_1421	-0.410632	3.6077e-12	1
prot_naive::A0A0B4J1V2_pn12	prot_naive::Q15428_pn12	-0.413447	2.69501e-07	1
metab_infant::vam_1033642_pn12	metab_infant::vam_2040057_pn12	-0.413469	1.32995e-12	1
prot_naive::A0A0A0MS15_pn12	prot_naive::Q15428_pn12	-0.414167	2.56997e-07	1
metab_milk::rLC_neg_mtb_1620620_pn34	metab_milk::rLC_neg_mtb_4313871_pn12	-0.415864	1.38024e-12	1
prot_dep::Q14126_pn12	prot_naive::Q9N2J8_pn12	-0.417222	2.08809e-07	1
metab_milk::rLC_neg_mtb_2072948_1421	metab_milk::rLC_pos_mtb_1209516_1421	-0.417924	1.38024e-12	1
metab_plasma::rLC_neg_mtb_2188685_pn12	metab_plasma::rLC_neg_mtb_4496106_pn12	-0.418412	8.82241e-05	1
metab_plasma::rLC_pos_mtb_636920_tri3	prot_dep::P13591_pn12	-0.424288	1.55692e-07	1
metab_milk::rLC_neg_mtb_1787234_pn34	metab_milk::rLC_neg_mtb_2072948_1421	-0.425822	1.02996e-12	1
prot_dep::P04075_pn12	prot_dep::P13591_pn12	-0.425968	1.15719e-07	1
metab_infant::vam_1016111_pn34	metab_infant::vam_2007339_pn34	-0.427335	1.9002e-13	1
metab_plasma::rLC_pos_mtb_636920_tri3	prot_dep::P78527_pn12	-0.427706	1.2375e-07	1
metab_infant::vam_2017110_pn34	metab_infant::vam_2033729_pn34	-0.427921	1.75213e-13	1
prot_dep::Q14126_pn12	prot_naive::A0A0A0MS14_pn12	-0.428736	9.51629e-08	1
metab_infant::vam_1042620_pn34	metab_infant::vam_2008919_pn34	-0.429056	1.5076e-13	1
metab_infant::vam_1007266_pn34	metab_infant::vam_1009085_pn34	-0.429533	1.40461e-13	1
metab_plasma::rLC_neg_mtb_1117333_pn12	metab_vams_post::vam_1027019_pn56	-0.429878	6.61514e-05	1
prot_dep::P13591_pn12	prot_naive::A0A0B4J1V2_pn12	-0.431861	7.66249e-08	1
metab_milk::rLC_neg_mtb_2072948_1421	metab_milk::rLC_pos_mtb_1554380_1421	-0.432614	1.80957e-13	1
metab_milk::rLC_neg_mtb_2072948_1421	metab_milk::rLC_neg_mtb_2197266_pn12	-0.441477	7.00704e-14	1
prot_dep::P13591_pn12	prot_naive::A0A0A0MS15_pn12	-0.44206	3.64944e-08	1
prot_dep::O94979_pn12	prot_dep::P51812_pn12	-0.443131	3.36979e-08	1
metab_infant::vam_1006527_pn12	metab_infant::vam_1033642_pn12	-0.446336	1.15463e-14	1
milk::X2.FL_pn12	metab_milk::rLC_neg_mtb_2072948_1421	-0.446804	3.25942e-14	1
metab_infant::vam_1016111_pn34	metab_infant::vam_2008919_pn34	-0.44792	8.96858e-15	1
metab_infant::vam_1033642_pn12	metab_infant::vam_2006912_pn12	-0.45011	6.36088e-15	1
prot_dep::Q8IW92_pn12	prot_naive::Q15428_pn12	-0.458196	1.08575e-08	1
prot_dep::P13591_pn12	prot_naive::A0A0A0MT89_pn12	-0.460809	8.92698e-09	1
metab_infant::vam_1042620_pn34	metab_infant::vam_2007339_pn34	-0.464189	0	1
prot_dep::P78527_pn12	prot_dep::Q7Z398_pn12	-0.469521	4.50373e-09	1
metab_infant::vam_1004554_pn12	metab_infant::vam_1033642_pn12	-0.470583	0	1
prot_naive::A0A0A0MT89_pn12	prot_naive::Q15428_pn12	-0.471237	3.90074e-09	1
prot_naive::Q15428_pn12	prot_naive::Q9N2J8_pn12	-0.49008	7.87285e-10	1
prot_dep::P51812_pn12	prot_naive::Q15428_pn12	-0.504802	2.1339e-10	1
prot_dep::O94979_pn12	prot_dep::Q7Z398_pn12	-0.511329	1.16677e-10	1
prot_dep::Q7Z398_pn12	prot_naive::Q15428_pn12	-0.521032	4.70243e-11	1
prot_naive::P00738_pn56	prot_naive::P16070_pn56	-0.529732	3.76964e-11	1
prot_dep::P13591_pn12	prot_naive::A0A0A0MS14_pn12	-0.540439	6.63649e-12	1
prot_dep::P13591_pn12	prot_naive::Q9N2J8_pn12	-0.551409	2.07233e-12	1
prot_dep::P13591_pn12	prot_dep::Q8IW92_pn12	-0.572658	1.83557e-13	1
prot_naive::A0A0A0MS14_pn12	prot_naive::Q15428_pn12	-0.582479	5.77451e-14	1
prot_dep::Q14126_pn12	prot_dep::Q7Z398_pn12	-0.617037	0	1
prot_dep::Q14126_pn12	prot_dep::Q8IW92_pn12	-0.624323	0	1
prot_dep::P13591_pn12	prot_dep::P51812_pn12	-0.630637	0	1
prot_dep::P51812_pn12	prot_dep::Q14126_pn12	-0.642741	0	1
prot_dep::P13591_pn12	prot_dep::Q7Z398_pn12	-0.77263	0	1
prot_dep::P51812_pn12	prot_dep::P78527_pn12	-0.775988	0	1
prot_dep::P78527_pn12	prot_dep::Q8IW92_pn12	-0.80692	0	1
