# Supplementary material
Source: Research Square preprint supplement (doi:10.21203/rs.3.rs-10290866/v1)
Supplement: Supplementary file 3 [file 3d4c5e67e7bfb4b6f3c502b7.xlsx]

## Sheet: Description
	Effect of maternal balanced energy–protein (BEP) supplementation on targeted human milk components. This table summarizes the associations between maternal BEP supplementation and targeted human milk components measured at different lactation time points. Results are presented for each intervention comparison with the control group using adjusted linear regression models, together with machine-le…
Column	Description
feature:	Abbreviated name of the targeted human milk component.
feature_full:	Full name or description of the targeted human milk component.
timepoint:	Sample collection time point (14–21 days, 1–2 months, or 3–4 months postpartum).
intervention:	Intervention group compared with the control group.
estimate:	Adjusted regression coefficient representing the difference between the intervention and control groups in the original measurement units.
conf.low:	Lower bound of the 95% confidence interval for the regression coefficient.
conf.high:	Upper bound of the 95% confidence interval for the regression coefficient.
estimate_scaled:	Standardized effect size (z-score), allowing comparison of effect sizes across different milk components.
p.value:	Nominal P value from the adjusted regression model.
q.value:	False discovery rate (FDR)-adjusted P value.
covariate:	Covariate adjustment model used for the regression analysis.
sig:	Indicates whether the feature met the predefined significance criteria (p<0.05).
from_xgb:	Indicates whether the feature was selected by the XGBoost feature-selection model.
from_boruta:	Indicates whether the feature was selected by the Boruta feature-selection algorithm.
best_auc:	Highest area under the receiver operating characteristic curve (AUC) achieved by the corresponding machine-learning model.

## Sheet: milk_nutrients
feature	feature_full	timepoint	intervention	estimate	conf.low	conf.high	estimate_scaled	p.value	q.value	covariate	sig	from_xgb	from_boruta	best_auc
Kcal.L	Macronutrients: Kcal.L	14–21d	Pre+Postnatal	2.96127	-34.09	40.0126	4	0.874587	0.874587	primiparity;m_bmiincl;m_hbincl;ga_days_incl;GWG;w_age;m_heightincl;m_muacincl	FALSE
Kcal.L	Macronutrients: Kcal.L	14–21d	Prenatal	6.16048	-30.9081	43.229	4	0.742626	0.974456	primiparity;code_bep_n;m_bmiincl;ga_days_incl;GWG;w_age;m_heightincl;m_muacincl	FALSE
Leptin	Bioactive proteins: Leptin	14–21d	Pre+Postnatal	133.129	-189.365	455.623	4	0.41555	0.690888	primiparity;code_bep_n;m_bmiincl;m_hbincl;ga_days_incl;GWG;w_age;m_heightincl;m_muacincl	FALSE	TRUE	FALSE	0.560526
Leptin	Bioactive proteins: Leptin	14–21d	Prenatal	62.7027	-272.292	397.698	4	0.711557	0.961797	primiparity;code_bep_n;m_bmiincl;m_hbincl;ga_days_incl;GWG;w_age;m_heightincl;m_muacincl	FALSE	TRUE	FALSE	0.560526
Leptin	Bioactive proteins: Leptin	14–21d	Postnatal	310.628	-157.768	779.023	4	0.192042	0.614401	primiparity;m_bmiincl;ga_days_incl;m_muacincl	FALSE	TRUE	FALSE	0.560526
Calprotectin	Bioactive proteins: Calprotectin	14–21d	Postnatal	577596	-4.6256e+06	5.78079e+06	4	0.826645	0.872153	primiparity;m_hbincl;ga_days_incl;w_age;m_heightincl;m_muacincl	FALSE
Leptin	Bioactive proteins: Leptin	1–2m	Pre+Postnatal	261.93	-13.8707	537.731	4	0.062508	0.437556	primiparity;m_bmiincl;ga_days_incl;GWG;w_age;m_muacincl	FALSE
Calprotectin	Bioactive proteins: Calprotectin	1–2m	Pre+Postnatal	4.82192e+07	-5.78929e+07	1.54331e+08	4	0.370511	0.648394	primiparity;w_age	FALSE
IgA	Bioactive proteins: IgA	1–2m	Pre+Postnatal	263415776226319	-179045422539313	705876974991951	4	0.241138	0.648394	primiparity;m_bmiincl;m_hbincl;GWG;w_age	FALSE
Leptin	Bioactive proteins: Leptin	1–2m	Prenatal	150.896	-71.921	373.713	4	0.182578	0.745622	primiparity;m_bmiincl;m_hbincl;GWG;w_age;m_heightincl;m_muacincl	FALSE
Calprotectin	Bioactive proteins: Calprotectin	1–2m	Prenatal	59070.6	-1.19226e+06	1.31041e+06	4	0.925714	0.99339	primiparity;code_bep_n;m_bmiincl;ga_days_incl;GWG;w_age;m_heightincl;m_muacincl	FALSE
IgA	Bioactive proteins: IgA	1–2m	Prenatal	3.35876e+07	-8.616e+07	1.53335e+08	4	0.579827	0.811758	code_bep_n;m_bmiincl;ga_days_incl;GWG;w_age;m_heightincl;m_muacincl	FALSE
Leptin	Bioactive proteins: Leptin	1–2m	Postnatal	500.149	-58.4807	1058.78	4	0.0789337	0.552536	primiparity;m_bmiincl;m_muacincl	FALSE
Calprotectin	Bioactive proteins: Calprotectin	1–2m	Postnatal	66988.9	-855801	989779	4	0.886146	0.932777	primiparity;code_bep_n;m_bmiincl;m_hbincl;ga_days_incl;GWG;w_age;m_heightincl;m_muacincl	FALSE
Leptin	Bioactive proteins: Leptin	3–4m	Pre+Postnatal	147.899	-85.6019	381.399	4	0.212464	0.297449	primiparity;m_bmiincl;ga_days_incl;GWG;w_age;m_muacincl	FALSE
Calprotectin	Bioactive proteins: Calprotectin	3–4m	Pre+Postnatal	541017	-277218	1.35925e+06	4	0.193188	0.297449	m_bmiincl;m_hbincl;ga_days_incl;GWG;w_age;m_muacincl	FALSE
Leptin	Bioactive proteins: Leptin	3–4m	Prenatal	151.771	-94.1221	397.664	4	0.224099	0.307896	primiparity;code_bep_n;m_bmiincl;m_hbincl;ga_days_incl;GWG;m_heightincl;m_muacincl	FALSE
Leptin	Bioactive proteins: Leptin	3–4m	Postnatal	287.244	-51.7756	626.265	4	0.0961784	0.339106	primiparity;m_bmiincl;m_hbincl;ga_days_incl;w_age;m_muacincl	FALSE
Calprotectin	Bioactive proteins: Calprotectin	3–4m	Postnatal	239744	-534796	1.01428e+06	4	0.54171	0.778186	m_hbincl;ga_days_incl;w_age;m_heightincl;m_muacincl	FALSE
K	Minerals: K	1–2m	Pre+Postnatal	28.3572	-1.01768	57.7322	4	0.0583605	0.244389	m_bmiincl;GWG;m_muacincl	FALSE	TRUE	FALSE	0.558824
K	Minerals: K	1–2m	Pre+Postnatal	28.3572	-1.01768	57.7322	4	0.0583605	0.244389	m_bmiincl;GWG;m_muacincl	FALSE	FALSE	TRUE	0.533058
K	Minerals: K	1–2m	Prenatal	34.9788	-0.651111	70.6088	4	0.05427	0.352755	m_bmiincl;m_muacincl	FALSE	TRUE	FALSE	0.558824
K	Minerals: K	1–2m	Prenatal	34.9788	-0.651111	70.6088	4	0.05427	0.352755	m_bmiincl;m_muacincl	FALSE	FALSE	TRUE	0.533058
Ca	Minerals: Ca	1–2m	Prenatal	20.2198	-0.190591	40.6301	4	0.0521447	0.352755	primiparity;m_bmiincl;m_muacincl	FALSE	TRUE	FALSE	0.533058
Zn	Minerals: Zn	1–2m	Prenatal	111.017	-181.119	403.152	4	0.453354	0.694224	primiparity;m_bmiincl;GWG;m_heightincl;m_muacincl	FALSE
K	Minerals: K	1–2m	Postnatal	19.5161	-6.62331	45.6556	4	0.142258	0.323931	m_bmiincl;w_age;m_muacincl	FALSE	TRUE	FALSE	0.558824
K	Minerals: K	1–2m	Postnatal	19.5161	-6.62331	45.6556	4	0.142258	0.323931	m_bmiincl;w_age;m_muacincl	FALSE	FALSE	TRUE	0.533058
Zn	Minerals: Zn	3–4m	Prenatal	170.149	-63.2607	403.56	4	0.151575	0.436395	primiparity;m_bmiincl;GWG;m_heightincl;m_muacincl	FALSE
Zn	Minerals: Zn	3–4m	Postnatal	45.6846	-164.531	255.9	4	0.668229	0.984372	primiparity;GWG;w_age;m_heightincl;m_muacincl	FALSE
FAT	Macronutrients: FAT	1–2m	Pre+Postnatal	-0.715565	-1.22246	-0.208665	-4	0.0059877	0.0119754		TRUE	FALSE	TRUE	0.730903
FAT	Macronutrients: FAT	1–2m	Pre+Postnatal	-0.715565	-1.22246	-0.208665	-4	0.0059877	0.0119754		TRUE	FALSE	TRUE	0.707407
Kcal.L	Macronutrients: Kcal.L	1–2m	Pre+Postnatal	-66.8068	-113.995	-19.6184	-4	0.00584743	0.0119754		TRUE
FAT	Macronutrients: FAT	1–2m	Prenatal	-0.62743	-1.15924	-0.0956168	-4	0.0211277	0.0422555		TRUE	FALSE	TRUE	0.730903
FAT	Macronutrients: FAT	1–2m	Prenatal	-0.62743	-1.15924	-0.0956168	-4	0.0211277	0.0422555		TRUE	FALSE	TRUE	0.707407
Kcal.L	Macronutrients: Kcal.L	1–2m	Prenatal	-61.7111	-111.378	-12.0445	-4	0.0152848	0.0422555		TRUE
FAT	Macronutrients: FAT	1–2m	Postnatal	-0.540861	-1.02683	-0.0548909	-4	0.0293936	0.061864	m_muacincl	TRUE	FALSE	TRUE	0.730903
NR	Vitamins: NR	14–21d	Prenatal	81.2708	-85.1574	247.699	4	0.335614	0.623283	primiparity;m_hbincl;GWG	FALSE
Nufa	Vitamins: Nufa	14–21d	Prenatal	43.7213	-0.842391	88.285	4	0.0544177	0.4209	code_bep_n;m_bmiincl;m_hbincl;ga_days_incl;GWG;w_age;m_heightincl;m_muacincl	FALSE	FALSE	TRUE	0.905594
Nufa	Vitamins: Nufa	14–21d	Prenatal	43.7213	-0.842391	88.285	4	0.0544177	0.4209	code_bep_n;m_bmiincl;m_hbincl;ga_days_incl;GWG;w_age;m_heightincl;m_muacincl	FALSE	TRUE	TRUE	0.855263
PA	Vitamins: PA	14–21d	Prenatal	328.722	-20.4265	677.87	4	0.0647538	0.4209	m_bmiincl;ga_days_incl;GWG;m_muacincl	FALSE	TRUE	TRUE	0.905594
PA	Vitamins: PA	14–21d	Prenatal	328.722	-20.4265	677.87	4	0.0647538	0.4209	m_bmiincl;ga_days_incl;GWG;m_muacincl	FALSE	TRUE	TRUE	0.855263
NAD	Vitamins: NAD	14–21d	Postnatal	313.633	-628.977	1256.24	4	0.511804	0.633663	primiparity;m_bmiincl;ga_days_incl;w_age;m_heightincl;m_muacincl	FALSE
FAT	Macronutrients: FAT	1–2m	Postnatal	-0.540861	-1.02683	-0.0548909	-4	0.0293936	0.061864	m_muacincl	TRUE	FALSE	TRUE	0.707407
Kcal.L	Macronutrients: Kcal.L	1–2m	Postnatal	-49.2343	-93.8928	-4.57584	-4	0.030932	0.061864	m_muacincl	TRUE
X2.FL_nmol.mL	HMOs: X2.FL_nmol.mL	14–21d	Pre+Postnatal	-1678.41	-3147.63	-209.2	-4	0.0254675	0.159172	w_age	TRUE
LNFP.I_nmol.mL	HMOs: LNFP.I_nmol.mL	14–21d	Pre+Postnatal	-729.345	-1225.68	-233.009	-4	0.00428035	0.107009	primiparity;m_muacincl	TRUE
SUM_nmol.mL	HMOs: SUM_nmol.mL	14–21d	Pre+Postnatal	-2081.38	-3862.17	-300.584	-4	0.0223267	0.159172	primiparity;m_bmiincl;w_age;m_muacincl	TRUE
X2.FL_nmol.mL	HMOs: X2.FL_nmol.mL	1–2m	Pre+Postnatal	-1276.48	-2414.56	-138.398	-4	0.0282007	0.687283	w_age	TRUE
DFLac_nmol.mL	HMOs: DFLac_nmol.mL	1–2m	Prenatal	-133.728	-263.753	-3.7044	-4	0.0439093	0.964827	m_bmiincl	TRUE
B6	Vitamins: B6	14–21d	Postnatal	40.339	-8.97992	89.6579	4	0.108151	0.187462	m_bmiincl;m_hbincl;m_muacincl	FALSE	FALSE	TRUE	0.905594
B6	Vitamins: B6	14–21d	Postnatal	40.339	-8.97992	89.6579	4	0.108151	0.187462	m_bmiincl;m_hbincl;m_muacincl	FALSE	FALSE	TRUE	0.855263
NAM	Vitamins: NAM	1–2m	Pre+Postnatal	40.8292	-0.651641	82.3101	4	0.0536576	0.13951	code_bep_n;m_hbincl;ga_days_incl;w_age;m_heightincl	FALSE
X2.FL_nmol.mL	HMOs: X2.FL_nmol.mL	3–4m	Pre+Postnatal	-1128.37	-2182.8	-73.9384	-4	0.0361458	0.357509	GWG;w_age	TRUE
FGF.21	Bioactive proteins: FGF.21	3–4m	Pre+Postnatal	-19.9408	-33.848	-6.0337	-1.72004	0.00527631	0.0369341	primiparity;GWG;w_age;m_muacincl	TRUE
B3	Vitamins: B3	1–2m	Pre+Postnatal	168.204	-28.9183	365.327	4	0.093823	0.195552	code_bep_n;m_hbincl;ga_days_incl;m_heightincl	FALSE
X3.SL_nmol.mL	HMOs: X3.SL_nmol.mL	3–4m	Postnatal	-32.0319	-60.5436	-3.52025	-1.61881	0.0279282	0.698206	primiparity;m_bmiincl;w_age;m_muacincl	TRUE
DFLNH_nmol.mL	HMOs: DFLNH_nmol.mL	3–4m	Prenatal	-17.4658	-34.721	-0.210651	-0.843785	0.0473104	0.621019	primiparity;m_bmiincl;m_hbincl;ga_days_incl;w_age;m_muacincl	TRUE
Mn	Minerals: Mn	1–2m	Postnatal	-3.13085	-6.19514	-0.0665554	-0.801532	0.0452871	0.253259	m_hbincl;w_age;m_heightincl;m_muacincl	TRUE	FALSE	TRUE	0.533058
Mg	Minerals: Mg	3–4m	Pre+Postnatal	-2.76542	-5.04553	-0.485312	-0.662549	0.0178122	0.231558	GWG	TRUE
TPP	Vitamins: TPP	1–2m	Postnatal	-2.55051	-4.32613	-0.774899	-0.545081	0.00514874	0.0133867	w_age;m_muacincl	TRUE
NMN	Vitamins: NMN	1–2m	Prenatal	69.5501	-49.7271	188.827	4	0.25075	0.75824	primiparity;m_bmiincl;GWG;m_muacincl	FALSE
NR	Vitamins: NR	1–2m	Prenatal	41.1045	-90.5798	172.789	4	0.53785	0.75824	primiparity;code_bep_n;m_bmiincl;m_hbincl;ga_days_incl;w_age;m_heightincl;m_muacincl	FALSE
TPP	Vitamins: TPP	3–4m	Pre+Postnatal	-1.72661	-2.98926	-0.463968	-0.454245	0.007724	0.0223138	primiparity;m_bmiincl;ga_days_incl;GWG;w_age;m_muacincl	TRUE
GamaTocopherol	Vitamins: GamaTocopherol	1–2m	Postnatal	-0.280097	-0.436847	-0.123346	-0.294764	0.000545456	0.00236364	m_bmiincl;m_muacincl	TRUE
PM	Vitamins: PM	14–21d	Pre+Postnatal	0.0790147	0.00748628	0.150543	-0.255171	0.0306423	0.0612846	w_age	TRUE
PM	Vitamins: PM	3–4m	Pre+Postnatal	0.0829255	0.00399767	0.161853	-0.25474	0.0396133	0.102995	primiparity;m_hbincl;ga_days_incl	TRUE
FMN	Vitamins: FMN	14–21d	Prenatal	1.748	0.453821	3.04217	-0.0711635	0.00851775	0.221462		TRUE	FALSE	TRUE	0.905594
FMN	Vitamins: FMN	14–21d	Prenatal	1.748	0.453821	3.04217	-0.0711635	0.00851775	0.221462		TRUE	TRUE	FALSE	0.57438
B3	Vitamins: B3	1–2m	Postnatal	173.757	-10.7085	358.223	4	0.0646803	0.105106	m_hbincl;ga_days_incl;w_age;m_heightincl;m_muacincl	FALSE
FMN	Vitamins: FMN	14–21d	Prenatal	1.748	0.453821	3.04217	-0.0711635	0.00851775	0.221462		TRUE	FALSE	TRUE	0.855263
Ribo	Vitamins: Ribo	14–21d	Prenatal	3.06737	0.0538784	6.08085	0.074299	0.0461035	0.4209	primiparity;m_bmiincl;GWG	TRUE	FALSE	TRUE	0.905594
Ribo	Vitamins: Ribo	14–21d	Prenatal	3.06737	0.0538784	6.08085	0.074299	0.0461035	0.4209	primiparity;m_bmiincl;GWG	TRUE	TRUE	TRUE	0.855263
FMN	Vitamins: FMN	14–21d	Postnatal	3.66196	1.90588	5.41804	0.139854	6.24754e-05	0.000270727	m_bmiincl	TRUE	FALSE	TRUE	0.905594
FMN	Vitamins: FMN	14–21d	Postnatal	3.66196	1.90588	5.41804	0.139854	6.24754e-05	0.000270727	m_bmiincl	TRUE	TRUE	FALSE	0.57438
B12	Vitamins: B12	1–2m	Postnatal	42.4819	-0.135241	85.099	4	0.0507226	0.0879191	m_bmiincl;m_muacincl	FALSE
FMN	Vitamins: FMN	14–21d	Postnatal	3.66196	1.90588	5.41804	0.139854	6.24754e-05	0.000270727	m_bmiincl	TRUE	FALSE	TRUE	0.855263
FMN	Vitamins: FMN	14–21d	Pre+Postnatal	4.87409	2.14665	7.60152	0.273493	0.00056214	0.00171273	primiparity	TRUE	FALSE	TRUE	0.905594
FMN	Vitamins: FMN	14–21d	Pre+Postnatal	4.87409	2.14665	7.60152	0.273493	0.00056214	0.00171273	primiparity	TRUE	TRUE	FALSE	0.57438
FMN	Vitamins: FMN	14–21d	Pre+Postnatal	4.87409	2.14665	7.60152	0.273493	0.00056214	0.00171273	primiparity	TRUE	FALSE	TRUE	0.855263
FMN	Vitamins: FMN	3–4m	Pre+Postnatal	5.16056	2.72133	7.5998	0.305077	5.04164e-05	0.000218471		TRUE	FALSE	TRUE	0.969136
B3	Vitamins: B3	3–4m	Pre+Postnatal	151.335	-1.5422	304.211	4	0.0523239	0.113368	ga_days_incl;GWG	FALSE
FMN	Vitamins: FMN	3–4m	Pre+Postnatal	5.16056	2.72133	7.5998	0.305077	5.04164e-05	0.000218471		TRUE	FALSE	TRUE	0.945
FMN	Vitamins: FMN	1–2m	Pre+Postnatal	5.49351	2.60966	8.37737	0.341785	0.000242952	0.00210559		TRUE	FALSE	TRUE	0.853801
FMN	Vitamins: FMN	1–2m	Pre+Postnatal	5.49351	2.60966	8.37737	0.341785	0.000242952	0.00210559		TRUE	FALSE	TRUE	0.890476
FMN	Vitamins: FMN	3–4m	Postnatal	5.92786	3.3155	8.54022	0.389673	1.42702e-05	7.42052e-05		TRUE	FALSE	TRUE	0.969136
FMN	Vitamins: FMN	3–4m	Postnatal	5.92786	3.3155	8.54022	0.389673	1.42702e-05	7.42052e-05		TRUE	FALSE	TRUE	0.945
TRP	Vitamins: TRP	3–4m	Pre+Postnatal	48.5856	-6.84415	104.015	4	0.0852865	0.170573	primiparity;code_bep_n;m_hbincl;ga_days_incl;GWG;w_age;m_heightincl;m_muacincl	FALSE
FMN	Vitamins: FMN	1–2m	Postnatal	6.58133	4.07788	9.08478	0.461719	6.24724e-07	5.41428e-06		TRUE	FALSE	TRUE	0.853801
FMN	Vitamins: FMN	1–2m	Postnatal	6.58133	4.07788	9.08478	0.461719	6.24724e-07	5.41428e-06		TRUE	FALSE	TRUE	0.890476
NAD	Vitamins: NAD	3–4m	Postnatal	164.181	-243.133	571.495	4	0.427011	0.52868	primiparity;code_bep_n;m_bmiincl;ga_days_incl;w_age;m_heightincl;m_muacincl	FALSE
T	Vitamins: T	1–2m	Pre+Postnatal	8.36802	0.707466	16.0286	0.658704	0.0325056	0.0939049	m_bmiincl;w_age;m_muacincl	TRUE	FALSE	TRUE	0.853801
T	Vitamins: T	1–2m	Pre+Postnatal	8.36802	0.707466	16.0286	0.658704	0.0325056	0.0939049	m_bmiincl;w_age;m_muacincl	TRUE	FALSE	TRUE	0.890476
Se	Minerals: Se	1–2m	Postnatal	1.01112	0.210822	1.81143	0.773792	0.0136317	0.177212	primiparity;m_bmiincl;m_hbincl;GWG;w_age;m_heightincl;m_muacincl	TRUE
T	Vitamins: T	14–21d	Pre+Postnatal	10.1974	5.58126	14.8136	0.860399	2.46168e-05	0.000160009		TRUE	TRUE	TRUE	0.905594
T	Vitamins: T	14–21d	Pre+Postnatal	10.1974	5.58126	14.8136	0.860399	2.46168e-05	0.000160009		TRUE	FALSE	TRUE	0.855263
Se	Minerals: Se	3–4m	Postnatal	1.50203	0.79653	2.20753	0.9605	4.41909e-05	0.000574482	m_bmiincl;m_muacincl	TRUE	TRUE	TRUE	0.619048
Se	Minerals: Se	3–4m	Postnatal	1.50203	0.79653	2.20753	0.9605	4.41909e-05	0.000574482	m_bmiincl;m_muacincl	TRUE	TRUE	TRUE	0.577778
Se	Minerals: Se	3–4m	Postnatal	1.50203	0.79653	2.20753	0.9605	4.41909e-05	0.000574482	m_bmiincl;m_muacincl	TRUE	TRUE	TRUE	0.636829
T	Vitamins: T	14–21d	Postnatal	12.9104	7.1731	18.6477	1.15951	1.69558e-05	0.000110213		TRUE	TRUE	TRUE	0.905594
B12	Vitamins: B12	3–4m	Postnatal	50.4126	-1.15034	101.975	4	0.0552658	0.110532	m_bmiincl;w_age;m_muacincl	FALSE
X3FL_nmol.mL	HMOs: X3FL_nmol.mL	14–21d	Pre+Postnatal	225.249	-183.237	633.734	4	0.277379	0.59369	primiparity;m_bmiincl;m_muacincl	FALSE
LNT_nmol.mL	HMOs: LNT_nmol.mL	14–21d	Pre+Postnatal	89.9917	-558.413	738.397	4	0.784064	0.955819	primiparity;code_bep_n;m_bmiincl;ga_days_incl;GWG;w_age;m_heightincl;m_muacincl	FALSE
DFLNT_nmol.mL	HMOs: DFLNT_nmol.mL	14–21d	Pre+Postnatal	129.755	-223.112	482.623	4	0.468238	0.83614	primiparity;m_bmiincl;ga_days_incl;GWG;w_age;m_muacincl	FALSE
X6.SL_nmol.mL	HMOs: X6.SL_nmol.mL	14–21d	Postnatal	146.263	-74.4113	366.938	4	0.192245	0.804703	primiparity;code_bep_n;m_bmiincl;m_hbincl;ga_days_incl;GWG;w_age;m_heightincl;m_muacincl	FALSE
Sia_nmol.mL	HMOs: Sia_nmol.mL	14–21d	Postnatal	154.942	-266.781	576.665	4	0.468878	0.804703	primiparity;code_bep_n;m_bmiincl;m_hbincl;ga_days_incl;GWG;w_age;m_heightincl;m_muacincl	FALSE
X3FL_nmol.mL	HMOs: X3FL_nmol.mL	1–2m	Pre+Postnatal	396.524	-65.7441	858.793	4	0.0921278	0.767732	primiparity;m_bmiincl;m_muacincl	FALSE
LNT_nmol.mL	HMOs: LNT_nmol.mL	1–2m	Pre+Postnatal	118.332	-187.55	424.214	4	0.445559	0.893323	primiparity;m_bmiincl;m_hbincl;ga_days_incl;GWG;w_age;m_muacincl	FALSE
X3FL_nmol.mL	HMOs: X3FL_nmol.mL	3–4m	Pre+Postnatal	311.135	-252.97	875.241	4	0.277318	0.43331	primiparity;w_age;m_muacincl	FALSE
LNT_nmol.mL	HMOs: LNT_nmol.mL	3–4m	Pre+Postnatal	212.816	-40.479	466.111	4	0.0989058	0.357509	primiparity;ga_days_incl;GWG;w_age	FALSE
LNFP.II_nmol.mL	HMOs: LNFP.II_nmol.mL	3–4m	Pre+Postnatal	109.976	-59.3291	279.282	4	0.201112	0.386754	m_bmiincl;GWG;w_age;m_muacincl	FALSE	TRUE	FALSE	0.646154
DFLNT_nmol.mL	HMOs: DFLNT_nmol.mL	3–4m	Pre+Postnatal	74.9091	-82.8373	232.655	4	0.349251	0.436563	primiparity;code_bep_n;m_bmiincl;m_hbincl;ga_days_incl;GWG;w_age;m_heightincl;m_muacincl	FALSE
Sia_nmol.mL	HMOs: Sia_nmol.mL	3–4m	Pre+Postnatal	87.3103	-117.413	292.034	4	0.400409	0.476677	primiparity;m_bmiincl;m_hbincl;ga_days_incl;GWG;w_age;m_muacincl	FALSE
T	Vitamins: T	14–21d	Postnatal	12.9104	7.1731	18.6477	1.15951	1.69558e-05	0.000110213		TRUE	FALSE	TRUE	0.855263
Nufa	Vitamins: Nufa	1–2m	Prenatal	35.7388	-2.32761	73.8052	3.67638	0.06551	0.567753	m_bmiincl;m_hbincl;w_age;m_heightincl;m_muacincl	FALSE	TRUE	TRUE	0.853801
Nufa	Vitamins: Nufa	1–2m	Prenatal	35.7388	-2.32761	73.8052	3.67638	0.06551	0.567753	m_bmiincl;m_hbincl;w_age;m_heightincl;m_muacincl	FALSE	FALSE	TRUE	0.890476
NAM	Vitamins: NAM	14–21d	Postnatal	35.0576	-35.3238	105.439	3.60127	0.326497	0.446785	primiparity;m_bmiincl;m_hbincl;ga_days_incl;m_heightincl;m_muacincl	FALSE
Ribo	Vitamins: Ribo	14–21d	Pre+Postnatal	13.7772	8.93	18.6244	1.25508	1.06504e-07	1.38455e-06	primiparity	TRUE	FALSE	TRUE	0.905594
LNFP.I_nmol.mL	HMOs: LNFP.I_nmol.mL	1–2m	Prenatal	61.75	-232.288	355.788	3.37108	0.678446	0.964827	m_bmiincl;GWG;m_heightincl;m_muacincl	FALSE	FALSE	TRUE	0.652047
Ribo	Vitamins: Ribo	14–21d	Pre+Postnatal	13.7772	8.93	18.6244	1.25508	1.06504e-07	1.38455e-06	primiparity	TRUE	TRUE	TRUE	0.855263
T	Vitamins: T	1–2m	Postnatal	14.1148	6.08367	22.146	1.2923	0.000668198	0.00248188	m_bmiincl;w_age;m_muacincl	TRUE	FALSE	TRUE	0.853801
TRP	Vitamins: TRP	1–2m	Pre+Postnatal	31.8437	-29.9752	93.6626	3.24693	0.310133	0.36652	primiparity;code_bep_n;m_bmiincl;m_hbincl;ga_days_incl;GWG;w_age;m_heightincl;m_muacincl	FALSE
LNT_nmol.mL	HMOs: LNT_nmol.mL	1–2m	Postnatal	59.2303	-203.336	321.797	3.23701	0.656499	0.98932	primiparity;m_bmiincl;w_age;m_heightincl;m_muacincl	FALSE
T	Vitamins: T	1–2m	Postnatal	14.1148	6.08367	22.146	1.2923	0.000668198	0.00248188	m_bmiincl;w_age;m_muacincl	TRUE	FALSE	TRUE	0.890476
Ribo	Vitamins: Ribo	14–21d	Postnatal	14.2025	9.64941	18.7555	1.30196	6.26255e-09	5.42754e-08		TRUE	FALSE	TRUE	0.905594
Ca	Minerals: Ca	14–21d	Prenatal	7.11126	-17.6833	31.9058	3.09387	0.571144	0.783731	m_bmiincl;ga_days_incl;GWG;m_heightincl;m_muacincl	FALSE
Cu	Minerals: Cu	3–4m	Prenatal	7.05411	-22.0938	36.202	3.07213	0.632778	0.808074	primiparity;GWG;w_age;m_muacincl	FALSE
FLNH_nmol.mL	HMOs: FLNH_nmol.mL	14–21d	Pre+Postnatal	55.848	-39.9904	151.686	3.05705	0.251082	0.59369	primiparity;m_bmiincl;m_hbincl;ga_days_incl;GWG;m_muacincl	FALSE
Ca	Minerals: Ca	1–2m	Pre+Postnatal	6.98948	-7.60756	21.5865	3.04755	0.345283	0.498742	m_bmiincl;GWG;w_age;m_heightincl;m_muacincl	FALSE	TRUE	FALSE	0.533058
Cu	Minerals: Cu	3–4m	Pre+Postnatal	6.85147	-20.6626	34.3656	2.99506	0.623146	0.9001	primiparity;m_bmiincl;m_hbincl;ga_days_incl;GWG;w_age;m_heightincl	FALSE
Ribo	Vitamins: Ribo	14–21d	Postnatal	14.2025	9.64941	18.7555	1.30196	6.26255e-09	5.42754e-08		TRUE	TRUE	TRUE	0.855263
PL	Vitamins: PL	1–2m	Pre+Postnatal	14.4131	1.63799	27.1882	1.32518	0.0273086	0.0887528	primiparity;m_bmiincl;m_hbincl;GWG;m_muacincl	TRUE
NAM	Vitamins: NAM	3–4m	Pre+Postnatal	27.6055	-14.2404	69.4513	2.77966	0.194276	0.336746	ga_days_incl;GWG	FALSE
Na	Minerals: Na	3–4m	Postnatal	6.03586	-50.613	62.6847	2.68486	0.833518	0.984372	code_bep_n;m_bmiincl;m_hbincl;ga_days_incl;GWG;w_age;m_heightincl;m_muacincl	FALSE
LNT_nmol.mL	HMOs: LNT_nmol.mL	3–4m	Prenatal	48.4646	-199.766	296.696	2.6642	0.699784	0.860844	primiparity;code_bep_n;m_bmiincl;m_hbincl;ga_days_incl;GWG;w_age;m_muacincl	FALSE
LNH_nmol.mL	HMOs: LNH_nmol.mL	14–21d	Postnatal	47.9411	-5.85983	101.742	2.63634	0.0803252	0.804703	m_hbincl;m_muacincl	FALSE
B12	Vitamins: B12	1–2m	Pre+Postnatal	26.23	-6.38966	58.8496	2.62801	0.114108	0.197787	primiparity;m_bmiincl;GWG;m_muacincl	FALSE
B6	Vitamins: B6	1–2m	Pre+Postnatal	15.0144	2.2298	27.7989	1.39147	0.0216895	0.0805609	primiparity;m_bmiincl;m_hbincl;GWG;m_muacincl	TRUE
PL	Vitamins: PL	1–2m	Postnatal	16.362	3.5542	29.1699	1.54006	0.012616	0.0252319	m_bmiincl;m_muacincl	TRUE
B6	Vitamins: B6	1–2m	Postnatal	16.6947	3.7625	29.6269	1.57674	0.0117304	0.0252319	m_bmiincl;m_muacincl	TRUE
B1	Vitamins: B1	1–2m	Postnatal	18.4103	1.78509	35.0355	1.76588	0.0302005	0.0560866	m_bmiincl;w_age;m_muacincl	TRUE
Cr	Minerals: Cr	14–21d	Prenatal	5.78689	-3.98531	15.5591	2.59017	0.243223	0.783731	primiparity;code_bep_n;m_bmiincl;m_hbincl;ga_days_incl;GWG;w_age;m_heightincl;m_muacincl	FALSE
X6.SL_nmol.mL	HMOs: X6.SL_nmol.mL	3–4m	Prenatal	46.9923	-50.347	144.332	2.58586	0.341096	0.775217	primiparity;m_bmiincl;m_hbincl;ga_days_incl;GWG;w_age;m_heightincl	FALSE
Ribo	Vitamins: Ribo	1–2m	Pre+Postnatal	18.5721	8.32205	28.8222	1.78372	0.000469155	0.0030495	m_bmiincl;w_age	TRUE	FALSE	TRUE	0.853801
FAD	Vitamins: FAD	3–4m	Postnatal	24.8758	-8.61055	58.3621	2.47871	0.144245	0.250024	primiparity;m_bmiincl;w_age;m_heightincl;m_muacincl	FALSE	TRUE	FALSE	0.617647
Ribo	Vitamins: Ribo	1–2m	Pre+Postnatal	18.5721	8.32205	28.8222	1.78372	0.000469155	0.0030495	m_bmiincl;w_age	TRUE	FALSE	TRUE	0.890476
B2	Vitamins: B2	14–21d	Pre+Postnatal	20.0074	5.59157	34.4232	1.94196	0.0068902	0.0149288	m_bmiincl;w_age;m_muacincl	TRUE
PL	Vitamins: PL	3–4m	Postnatal	20.3381	9.54638	31.1299	1.97843	0.000275981	0.000928732	m_bmiincl;m_heightincl	TRUE	FALSE	TRUE	0.969136
LNFP.I_nmol.mL	HMOs: LNFP.I_nmol.mL	3–4m	Prenatal	42.135	-238.828	323.098	2.32741	0.767039	0.860844	primiparity;code_bep_n;m_bmiincl;m_hbincl;ga_days_incl;GWG;w_age;m_heightincl;m_muacincl	FALSE
PL	Vitamins: PL	3–4m	Postnatal	20.3381	9.54638	31.1299	1.97843	0.000275981	0.000928732	m_bmiincl;m_heightincl	TRUE	FALSE	TRUE	0.945
B12	Vitamins: B12	3–4m	Pre+Postnatal	23.3799	-16.3073	63.0671	2.31379	0.245944	0.37615	primiparity;m_bmiincl;m_hbincl;ga_days_incl;w_age;m_heightincl;m_muacincl	FALSE
X6.SL_nmol.mL	HMOs: X6.SL_nmol.mL	3–4m	Pre+Postnatal	41.5231	-43.8902	126.936	2.29486	0.338029	0.436563	primiparity;m_hbincl;ga_days_incl;GWG;w_age	FALSE
B6	Vitamins: B6	3–4m	Postnatal	20.4666	9.48218	31.4511	1.99259	0.000321484	0.000928732	m_bmiincl;m_heightincl	TRUE	FALSE	TRUE	0.969136
B6	Vitamins: B6	3–4m	Postnatal	20.4666	9.48218	31.4511	1.99259	0.000321484	0.000928732	m_bmiincl;m_heightincl	TRUE	FALSE	TRUE	0.945
B12	Vitamins: B12	1–2m	Prenatal	21.642	-19.4863	62.7703	2.12218	0.299686	0.75824	primiparity;m_bmiincl;m_heightincl;m_muacincl	FALSE
PL	Vitamins: PL	14–21d	Pre+Postnatal	21.6338	10.7373	32.5303	2.12128	0.000137756	0.000511666	primiparity;w_age	TRUE	FALSE	TRUE	0.905594
DFLNT_nmol.mL	HMOs: DFLNT_nmol.mL	1–2m	Pre+Postnatal	38.2102	-168.059	244.479	2.11859	0.714658	0.893323	primiparity;code_bep_n;m_bmiincl;m_hbincl;ga_days_incl;GWG;w_age;m_heightincl;m_muacincl	FALSE
LNFP.II_nmol.mL	HMOs: LNFP.II_nmol.mL	1–2m	Pre+Postnatal	37.9898	-145.696	221.676	2.10686	0.6832	0.893323	primiparity;m_bmiincl;ga_days_incl;w_age;m_muacincl	FALSE
FLNH_nmol.mL	HMOs: FLNH_nmol.mL	14–21d	Prenatal	37.6717	-57.9552	133.299	2.08993	0.437062	0.831497	primiparity	FALSE
LSTc_nmol.mL	HMOs: LSTc_nmol.mL	14–21d	Postnatal	37.2841	-43.8368	118.405	2.06931	0.365155	0.804703	primiparity;code_bep_n;m_hbincl;ga_days_incl;GWG;w_age;m_heightincl;m_muacincl	FALSE
FAT	Macronutrients: FAT	14–21d	Prenatal	0.0990329	-0.295469	0.493535	1.99646	0.619988	0.974456	primiparity;code_bep_n;m_bmiincl;ga_days_incl;GWG;w_age;m_heightincl;m_muacincl	FALSE
B6	Vitamins: B6	14–21d	Pre+Postnatal	22.5388	11.1994	33.8782	2.22105	0.000135172	0.000511666	w_age	TRUE	FALSE	TRUE	0.905594
B6	Vitamins: B6	14–21d	Pre+Postnatal	22.5388	11.1994	33.8782	2.22105	0.000135172	0.000511666	w_age	TRUE	FALSE	TRUE	0.855263
FDSLNH_nmol.mL	HMOs: FDSLNH_nmol.mL	3–4m	Pre+Postnatal	41.9038	4.10112	79.7064	2.31511	0.0300679	0.357509		TRUE	TRUE	TRUE	0.598958
PL	Vitamins: PL	14–21d	Postnatal	24.7539	3.19698	46.3108	2.46527	0.0247041	0.0535256	m_bmiincl;m_hbincl;m_muacincl	TRUE	FALSE	TRUE	0.905594
Ribo	Vitamins: Ribo	1–2m	Postnatal	24.7975	12.7116	36.8833	2.47007	7.91525e-05	0.000411593	m_bmiincl;m_muacincl	TRUE	FALSE	TRUE	0.853801
NAM	Vitamins: NAM	14–21d	Pre+Postnatal	19.9052	-68.6668	108.477	1.9307	0.657287	0.813784	primiparity;m_bmiincl;m_hbincl;ga_days_incl;GWG;w_age;m_muacincl	FALSE
FLNH_nmol.mL	HMOs: FLNH_nmol.mL	3–4m	Pre+Postnatal	33.4175	-3.12122	69.9562	1.86358	0.0727172	0.357509	primiparity;GWG;w_age	FALSE	TRUE	FALSE	0.598958
Ribo	Vitamins: Ribo	1–2m	Postnatal	24.7975	12.7116	36.8833	2.47007	7.91525e-05	0.000411593	m_bmiincl;m_muacincl	TRUE	FALSE	TRUE	0.890476
B2	Vitamins: B2	14–21d	Postnatal	25.786	12.0151	39.5568	2.57906	0.000302604	0.00087419	w_age	TRUE
B6	Vitamins: B6	3–4m	Pre+Postnatal	25.8927	15.1943	36.5911	2.59083	4.30991e-06	2.80144e-05	m_bmiincl;m_muacincl	TRUE	FALSE	TRUE	0.969136
LNH_nmol.mL	HMOs: LNH_nmol.mL	14–21d	Prenatal	30.6186	-24.0965	85.3337	1.71466	0.270091	0.767011	primiparity;m_bmiincl;m_hbincl;w_age;m_heightincl;m_muacincl	FALSE
Na	Minerals: Na	1–2m	Postnatal	3.42089	-37.805	44.6468	1.69031	0.869967	0.869967	primiparity;code_bep_n;m_bmiincl;m_hbincl;ga_days_incl;GWG;w_age;m_heightincl;m_muacincl	FALSE
LNnT_nmol.mL	HMOs: LNnT_nmol.mL	1–2m	Postnatal	29.692	-35.0043	94.3883	1.66536	0.366074	0.98932	primiparity;w_age	FALSE
Ca	Minerals: Ca	1–2m	Postnatal	3.19628	-10.2921	16.6846	1.60488	0.640319	0.693679	code_bep_n;m_bmiincl;ga_days_incl;m_heightincl;m_muacincl	FALSE	TRUE	FALSE	0.533058
B6	Vitamins: B6	3–4m	Pre+Postnatal	25.8927	15.1943	36.5911	2.59083	4.30991e-06	2.80144e-05	m_bmiincl;m_muacincl	TRUE	FALSE	TRUE	0.945
FAD	Vitamins: FAD	14–21d	Postnatal	16.5355	-9.27249	42.3436	1.55919	0.207421	0.317232	primiparity;m_hbincl;w_age;m_heightincl;m_muacincl	FALSE
PL	Vitamins: PL	3–4m	Pre+Postnatal	25.9352	15.3692	36.5011	2.59551	3.21989e-06	2.79057e-05	m_bmiincl;m_muacincl	TRUE	FALSE	TRUE	0.969136
LNH_nmol.mL	HMOs: LNH_nmol.mL	14–21d	Pre+Postnatal	26.7763	-22.5618	76.1143	1.51022	0.284971	0.59369	primiparity;m_hbincl;GWG;w_age;m_heightincl	FALSE
X3FL_nmol.mL	HMOs: X3FL_nmol.mL	1–2m	Postnatal	26.2114	-434.483	486.905	1.48016	0.910652	0.98932	code_bep_n;m_bmiincl;m_hbincl;ga_days_incl;GWG;w_age;m_heightincl;m_muacincl	FALSE
LNT_nmol.mL	HMOs: LNT_nmol.mL	1–2m	Prenatal	24.6693	-259.66	308.999	1.39811	0.863948	0.964827	primiparity;m_bmiincl;m_hbincl;w_age;m_heightincl;m_muacincl	FALSE
PL	Vitamins: PL	3–4m	Pre+Postnatal	25.9352	15.3692	36.5011	2.59551	3.21989e-06	2.79057e-05	m_bmiincl;m_muacincl	TRUE	FALSE	TRUE	0.945
B2	Vitamins: B2	1–2m	Pre+Postnatal	14.7709	-3.14227	32.6841	1.36464	0.105297	0.195552	m_bmiincl;m_muacincl	FALSE
NMN	Vitamins: NMN	14–21d	Prenatal	14.7587	-187.926	217.443	1.36329	0.885584	0.946486	primiparity;code_bep_n;m_bmiincl;m_hbincl;ga_days_incl;GWG;w_age;m_heightincl;m_muacincl	FALSE
PN	Vitamins: PN	14–21d	Postnatal	14.549	-14.2266	43.3246	1.34017	0.319345	0.446785	m_bmiincl;m_hbincl;m_muacincl	FALSE
B2	Vitamins: B2	1–2m	Postnatal	28.4086	7.84481	48.9723	2.8682	0.00707994	0.0167344	m_bmiincl;m_muacincl	TRUE
X6.SL_nmol.mL	HMOs: X6.SL_nmol.mL	3–4m	Postnatal	22.8773	-51.1915	96.946	1.30276	0.542529	0.996267	primiparity;code_bep_n;m_bmiincl;m_hbincl;ga_days_incl;GWG;w_age;m_heightincl;m_muacincl	FALSE
TMP	Vitamins: TMP	14–21d	Pre+Postnatal	29.1457	12.1755	46.1159	2.94948	0.000899753	0.00233936	primiparity;m_bmiincl;w_age;m_muacincl	TRUE
Ribo	Vitamins: Ribo	3–4m	Postnatal	31.18	17.8862	44.4737	3.17375	7.5824e-06	4.92856e-05		TRUE	FALSE	TRUE	0.969136
TMP	Vitamins: TMP	14–21d	Prenatal	14.1797	-4.85332	33.2126	1.29945	0.142828	0.570731	primiparity;m_bmiincl;w_age;m_heightincl;m_muacincl	FALSE
Ribo	Vitamins: Ribo	3–4m	Postnatal	31.18	17.8862	44.4737	3.17375	7.5824e-06	4.92856e-05		TRUE	TRUE	TRUE	0.945
FDSLNH_nmol.mL	HMOs: FDSLNH_nmol.mL	14–21d	Pre+Postnatal	60.2878	14.4335	106.142	3.29328	0.0103599	0.129499	primiparity;m_hbincl;m_muacincl	TRUE
FLNH_nmol.mL	HMOs: FLNH_nmol.mL	14–21d	Postnatal	22.6716	-54.3285	99.6716	1.29182	0.561543	0.804703	m_bmiincl;ga_days_incl;w_age;m_muacincl	FALSE
FDSLNH_nmol.mL	HMOs: FDSLNH_nmol.mL	1–2m	Pre+Postnatal	22.6383	-19.1741	64.4507	1.29005	0.286268	0.877295	m_hbincl;w_age	FALSE
TMP	Vitamins: TMP	3–4m	Pre+Postnatal	14.0395	-8.43726	36.5163	1.284	0.218903	0.355718	m_bmiincl;m_hbincl;w_age	FALSE
FAT	Macronutrients: FAT	14–21d	Pre+Postnatal	0.049776	-0.353983	0.453535	1.28248	0.807673	0.874587	primiparity;m_hbincl;ga_days_incl;GWG;w_age;m_heightincl;m_muacincl	FALSE
LNFP.II_nmol.mL	HMOs: LNFP.II_nmol.mL	1–2m	Postnatal	22.1344	-161.201	205.469	1.26324	0.811807	0.98932	primiparity;m_bmiincl;m_hbincl;w_age;m_heightincl;m_muacincl	FALSE
TMP	Vitamins: TMP	14–21d	Postnatal	32.824	15.5998	50.0483	3.35502	0.000239248	0.000777555	m_bmiincl;m_muacincl	TRUE
B1	Vitamins: B1	14–21d	Pre+Postnatal	33.2563	17.5685	48.9441	3.40267	4.9764e-05	0.000258773	primiparity;w_age	TRUE	FALSE	TRUE	0.855263
FDSLNH_nmol.mL	HMOs: FDSLNH_nmol.mL	14–21d	Postnatal	20.2128	-19.8074	60.2331	1.16099	0.319826	0.804703	primiparity;m_bmiincl;m_hbincl;w_age;m_heightincl;m_muacincl	FALSE
LNnT_nmol.mL	HMOs: LNnT_nmol.mL	14–21d	Postnatal	20.203	-55.2424	95.6483	1.16047	0.597433	0.804703	primiparity;code_bep_n;m_hbincl;ga_days_incl;GWG;w_age;m_heightincl	FALSE
B1	Vitamins: B1	14–21d	Postnatal	36.3567	19.6563	53.057	3.74449	3.06846e-05	0.00015956	m_bmiincl;m_muacincl	TRUE	FALSE	TRUE	0.855263
NMN	Vitamins: NMN	14–21d	Pre+Postnatal	288.874	91.4382	486.309	4	0.00444645	0.0105098	m_hbincl	TRUE
B1	Vitamins: B1	3–4m	Pre+Postnatal	12.6232	-4.73113	29.9775	1.12784	0.152617	0.283431	m_bmiincl;GWG;m_heightincl;m_muacincl	FALSE
CARBOHYDRATE	Macronutrients: CARBOHYDRATE	14–21d	Postnatal	0.0386877	-0.0846058	0.161981	1.12175	0.53604	0.933771	primiparity;code_bep_n;m_bmiincl;m_hbincl;ga_days_incl;GWG;w_age;m_heightincl;m_muacincl	FALSE
X6.SL_nmol.mL	HMOs: X6.SL_nmol.mL	1–2m	Prenatal	19.4562	-139.074	177.986	1.12074	0.808473	0.964827	primiparity;code_bep_n;m_bmiincl;m_hbincl;ga_days_incl;GWG;w_age;m_heightincl;m_muacincl	FALSE
P	Minerals: P	1–2m	Prenatal	1.909	-9.73961	13.5576	1.11528	0.746159	0.808339	primiparity;m_bmiincl;m_hbincl;GWG;w_age;m_heightincl;m_muacincl	FALSE	TRUE	TRUE	0.558824
X6.SL_nmol.mL	HMOs: X6.SL_nmol.mL	14–21d	Prenatal	19.2584	-257.414	295.931	1.11021	0.890601	0.89231	primiparity;code_bep_n;m_bmiincl;m_hbincl;ga_days_incl;GWG;w_age;m_heightincl;m_muacincl	FALSE
X3FL_nmol.mL	HMOs: X3FL_nmol.mL	1–2m	Prenatal	19.107	-494.225	532.439	1.10216	0.941401	0.964827	primiparity;m_bmiincl;m_hbincl;w_age;m_muacincl	FALSE
LNH_nmol.mL	HMOs: LNH_nmol.mL	1–2m	Postnatal	17.5117	-17.8424	52.8657	1.01727	0.32939	0.98932	primiparity;m_hbincl;w_age;m_heightincl	FALSE	TRUE	FALSE	0.732639
B1	Vitamins: B1	14–21d	Prenatal	11.5526	-4.92071	28.0259	1.00981	0.167582	0.570731	primiparity;m_bmiincl;ga_days_incl;m_muacincl	FALSE	FALSE	TRUE	0.855263
CARBOHYDRATE	Macronutrients: CARBOHYDRATE	1–2m	Postnatal	0.0309431	-0.0726054	0.134492	1.00949	0.555775	0.555775	primiparity;code_bep_n;m_bmiincl;m_hbincl;ga_days_incl;GWG;w_age;m_heightincl	FALSE
CARBOHYDRATE	Macronutrients: CARBOHYDRATE	3–4m	Pre+Postnatal	0.0296332	-0.0784218	0.137688	0.990506	0.588385	0.588385	primiparity;code_bep_n;m_bmiincl;m_hbincl;ga_days_incl;GWG;w_age;m_heightincl;m_muacincl	FALSE
B1	Vitamins: B1	1–2m	Pre+Postnatal	11.3747	-3.29495	26.0443	0.99019	0.127529	0.207234	m_bmiincl;w_age;m_muacincl	FALSE
DSLNT_nmol.mL	HMOs: DSLNT_nmol.mL	1–2m	Prenatal	16.9818	-20.3433	54.307	0.989083	0.36964	0.964827	primiparity;m_bmiincl;m_hbincl;GWG;w_age;m_muacincl	FALSE
NR	Vitamins: NR	14–21d	Pre+Postnatal	348.145	152.454	543.835	4	0.000592869	0.00171273		TRUE
B3	Vitamins: B3	14–21d	Pre+Postnatal	276.898	4.29453	549.502	4	0.0465502	0.0864504	primiparity;m_bmiincl;m_hbincl;ga_days_incl;w_age;m_muacincl	TRUE	FALSE	TRUE	0.855263
Nufa	Vitamins: Nufa	14–21d	Pre+Postnatal	121.985	77.6841	166.287	4	2.44416e-07	2.11827e-06	primiparity;m_hbincl;ga_days_incl	TRUE	FALSE	TRUE	0.905594
FDSLNH_nmol.mL	HMOs: FDSLNH_nmol.mL	14–21d	Prenatal	15.8883	-27.5291	59.3057	0.930899	0.470194	0.831497	primiparity;m_bmiincl;GWG;m_heightincl	FALSE
LNT_nmol.mL	HMOs: LNT_nmol.mL	3–4m	Postnatal	15.8143	-199.487	231.116	0.926962	0.884785	0.996267	primiparity;code_bep_n;m_bmiincl;ga_days_incl;GWG;w_age;m_heightincl;m_muacincl	FALSE
FSH	Bioactive proteins: FSH	14–21d	Pre+Postnatal	10.755	-9.0187	30.5288	0.911143	0.283878	0.690888	primiparity;m_bmiincl;m_hbincl;ga_days_incl;GWG;w_age;m_muacincl	FALSE
Mg	Minerals: Mg	1–2m	Prenatal	1.2999	-1.43068	4.03048	0.883622	0.347854	0.694224	primiparity;code_bep_n;m_hbincl;ga_days_incl;GWG;w_age;m_muacincl	FALSE
Nufa	Vitamins: Nufa	14–21d	Pre+Postnatal	121.985	77.6841	166.287	4	2.44416e-07	2.11827e-06	primiparity;m_hbincl;ga_days_incl	TRUE	TRUE	TRUE	0.855263
PA	Vitamins: PA	14–21d	Pre+Postnatal	1205.02	805.911	1604.13	4	1.99147e-08	5.17782e-07		TRUE	TRUE	TRUE	0.905594
LNnT_nmol.mL	HMOs: LNnT_nmol.mL	3–4m	Postnatal	14.2569	-52.8299	81.3437	0.844097	0.675127	0.996267	primiparity;code_bep_n;m_hbincl;ga_days_incl;GWG;w_age;m_heightincl	FALSE
Se	Minerals: Se	14–21d	Postnatal	1.182	-0.270295	2.63429	0.838781	0.109843	0.368197	primiparity;code_bep_n;m_bmiincl;m_hbincl;ga_days_incl;GWG;w_age;m_heightincl;m_muacincl	FALSE	FALSE	TRUE	0.617544
Se	Minerals: Se	14–21d	Postnatal	1.182	-0.270295	2.63429	0.838781	0.109843	0.368197	primiparity;code_bep_n;m_bmiincl;m_hbincl;ga_days_incl;GWG;w_age;m_heightincl;m_muacincl	FALSE	TRUE	FALSE	0.700405
Se	Minerals: Se	14–21d	Postnatal	1.182	-0.270295	2.63429	0.838781	0.109843	0.368197	primiparity;code_bep_n;m_bmiincl;m_hbincl;ga_days_incl;GWG;w_age;m_heightincl;m_muacincl	FALSE	FALSE	TRUE	0.611111
Sia_nmol.mL	HMOs: Sia_nmol.mL	1–2m	Prenatal	14.0108	-330.913	358.935	0.831002	0.93605	0.964827	primiparity;m_bmiincl;m_hbincl;ga_days_incl;GWG;w_age;m_heightincl;m_muacincl	FALSE
LNnT_nmol.mL	HMOs: LNnT_nmol.mL	14–21d	Prenatal	13.6009	-76.2786	103.48	0.809193	0.764977	0.831497	primiparity;code_bep_n;m_hbincl;ga_days_incl;GWG;w_age;m_heightincl;m_muacincl	FALSE
Na	Minerals: Na	1–2m	Prenatal	1.07558	-44.171	46.3221	0.798305	0.962542	0.962542	primiparity;code_bep_n;m_bmiincl;ga_days_incl;GWG;w_age;m_heightincl;m_muacincl	FALSE
LNFP.II_nmol.mL	HMOs: LNFP.II_nmol.mL	14–21d	Pre+Postnatal	13.3202	-285.981	312.621	0.794259	0.929975	0.955819	primiparity;code_bep_n;m_bmiincl;ga_days_incl;w_age;m_heightincl;m_muacincl	FALSE
B12	Vitamins: B12	14–21d	Pre+Postnatal	9.46404	-98.5413	117.469	0.779541	0.862556	0.897059	primiparity;code_bep_n;m_bmiincl;m_hbincl;ga_days_incl;GWG;w_age;m_heightincl;m_muacincl	FALSE
PA	Vitamins: PA	14–21d	Pre+Postnatal	1205.02	805.911	1604.13	4	1.99147e-08	5.17782e-07		TRUE	TRUE	TRUE	0.855263
Se	Minerals: Se	14–21d	Pre+Postnatal	1.00834	-0.553731	2.57042	0.772735	0.203757	0.662211	primiparity;code_bep_n;m_bmiincl;m_hbincl;ga_days_incl;GWG;w_age;m_heightincl;m_muacincl	FALSE	FALSE	TRUE	0.617544
Se	Minerals: Se	14–21d	Pre+Postnatal	1.00834	-0.553731	2.57042	0.772735	0.203757	0.662211	primiparity;code_bep_n;m_bmiincl;m_hbincl;ga_days_incl;GWG;w_age;m_heightincl;m_muacincl	FALSE	TRUE	FALSE	0.700405
Se	Minerals: Se	14–21d	Pre+Postnatal	1.00834	-0.553731	2.57042	0.772735	0.203757	0.662211	primiparity;code_bep_n;m_bmiincl;m_hbincl;ga_days_incl;GWG;w_age;m_heightincl;m_muacincl	FALSE	FALSE	TRUE	0.611111
Ca	Minerals: Ca	3–4m	Pre+Postnatal	1.00732	-12.4586	14.4732	0.772344	0.882591	0.936286	primiparity;code_bep_n;m_bmiincl;m_hbincl;ga_days_incl;GWG;w_age;m_heightincl;m_muacincl	FALSE
CARBOHYDRATE	Macronutrients: CARBOHYDRATE	3–4m	Postnatal	0.0120113	-0.0978806	0.121903	0.735076	0.829268	0.881876	primiparity;code_bep_n;m_bmiincl;m_hbincl;ga_days_incl;GWG;w_age;m_heightincl;m_muacincl	FALSE
Mg	Minerals: Mg	1–2m	Postnatal	0.740556	-1.69724	3.17835	0.670887	0.549234	0.693679	primiparity;code_bep_n;m_hbincl;ga_days_incl;GWG;m_heightincl;m_muacincl	FALSE
Mo	Minerals: Mo	14–21d	Prenatal	0.739797	-1.2798	2.75939	0.670598	0.469725	0.783731	primiparity;m_bmiincl	FALSE
Se	Minerals: Se	1–2m	Pre+Postnatal	0.735837	-0.183353	1.65503	0.669092	0.115681	0.244389	code_bep_n;m_bmiincl;m_hbincl;ga_days_incl;GWG;w_age;m_heightincl;m_muacincl	FALSE
LSTc_nmol.mL	HMOs: LSTc_nmol.mL	1–2m	Postnatal	10.8644	-24.6149	46.3438	0.663591	0.546116	0.98932	primiparity;code_bep_n;m_bmiincl;m_hbincl;GWG;w_age;m_heightincl	FALSE
X6.SL_nmol.mL	HMOs: X6.SL_nmol.mL	1–2m	Postnatal	10.8355	-113.206	134.877	0.662055	0.863207	0.98932	primiparity;code_bep_n;m_bmiincl;m_hbincl;ga_days_incl;GWG;w_age;m_heightincl;m_muacincl	FALSE
NMN	Vitamins: NMN	14–21d	Postnatal	341.169	167.45	514.889	4	0.000155687	0.000578266		TRUE
NR	Vitamins: NR	14–21d	Postnatal	204.096	61.5713	346.621	4	0.00530262	0.0137868	m_bmiincl	TRUE
FLNH_nmol.mL	HMOs: FLNH_nmol.mL	1–2m	Pre+Postnatal	10.6441	-43.663	64.9511	0.651868	0.698934	0.893323	primiparity;m_bmiincl;GWG;w_age;m_muacincl	FALSE
TMP	Vitamins: TMP	1–2m	Postnatal	8.25583	-12.9361	29.4477	0.646334	0.442763	0.575591	m_bmiincl;m_hbincl;ga_days_incl;m_muacincl	FALSE
LNH_nmol.mL	HMOs: LNH_nmol.mL	1–2m	Pre+Postnatal	10.4317	-27.0213	47.8848	0.64057	0.582651	0.893323	primiparity;m_bmiincl;m_hbincl;GWG;w_age;m_heightincl;m_muacincl	FALSE	TRUE	FALSE	0.732639
Ca	Minerals: Ca	3–4m	Postnatal	0.63558	-11.9714	13.2426	0.630961	0.920773	0.984372	primiparity;code_bep_n;m_hbincl;ga_days_incl;GWG;w_age;m_heightincl;m_muacincl	FALSE
FLNH_nmol.mL	HMOs: FLNH_nmol.mL	3–4m	Prenatal	10.2484	-29.7225	50.2194	0.630817	0.612717	0.860844	primiparity;GWG;w_age;m_heightincl	FALSE	TRUE	FALSE	0.598958
TRP	Vitamins: TRP	1–2m	Postnatal	8.0453	-45.1908	61.2815	0.623124	0.76568	0.829487	primiparity;code_bep_n;m_bmiincl;m_hbincl;ga_days_incl;GWG;w_age;m_heightincl;m_muacincl	FALSE
Cr	Minerals: Cr	14–21d	Pre+Postnatal	0.600808	-8.32821	9.52983	0.617736	0.894267	0.894267	primiparity;code_bep_n;m_bmiincl;m_hbincl;ga_days_incl;GWG;w_age;m_heightincl;m_muacincl	FALSE
LSTb_nmol.mL	HMOs: LSTb_nmol.mL	3–4m	Pre+Postnatal	9.88299	-3.05729	22.8233	0.611372	0.13326	0.357509	primiparity;m_bmiincl;ga_days_incl;GWG;m_muacincl	FALSE
B2	Vitamins: B2	14–21d	Prenatal	7.92864	-6.96372	22.821	0.610262	0.293904	0.591344	primiparity;m_bmiincl;m_hbincl;ga_days_incl;w_age;m_heightincl;m_muacincl	FALSE
PROTEIN	Macronutrients: PROTEIN	14–21d	Prenatal	0.00252575	-0.153347	0.158398	0.597581	0.974456	0.974456	primiparity;ga_days_incl;GWG;w_age;m_muacincl	FALSE
Mo	Minerals: Mo	14–21d	Pre+Postnatal	0.517761	-1.28517	2.3207	0.586151	0.570811	0.883261	primiparity;m_bmiincl;ga_days_incl;GWG;w_age;m_heightincl;m_muacincl	FALSE
Mo	Minerals: Mo	1–2m	Prenatal	0.504209	-1.81705	2.82547	0.580996	0.667917	0.789357	primiparity;code_bep_n;m_bmiincl;m_hbincl;ga_days_incl;GWG;w_age;m_heightincl;m_muacincl	FALSE
Se	Minerals: Se	3–4m	Pre+Postnatal	0.500802	-0.117214	1.11882	0.5797	0.111366	0.452093	m_bmiincl;m_hbincl;m_heightincl;m_muacincl	FALSE	TRUE	TRUE	0.619048
Se	Minerals: Se	3–4m	Pre+Postnatal	0.500802	-0.117214	1.11882	0.5797	0.111366	0.452093	m_bmiincl;m_hbincl;m_heightincl;m_muacincl	FALSE	TRUE	TRUE	0.577778
Se	Minerals: Se	3–4m	Pre+Postnatal	0.500802	-0.117214	1.11882	0.5797	0.111366	0.452093	m_bmiincl;m_hbincl;m_heightincl;m_muacincl	FALSE	TRUE	TRUE	0.636829
B1	Vitamins: B1	3–4m	Postnatal	7.01643	-9.20593	23.2388	0.50969	0.394146	0.512389	m_bmiincl;m_heightincl;m_muacincl	FALSE
LNH_nmol.mL	HMOs: LNH_nmol.mL	3–4m	Pre+Postnatal	7.96236	-21.1594	37.0841	0.509181	0.589546	0.619332	primiparity;code_bep_n;m_bmiincl;m_hbincl;w_age;m_heightincl;m_muacincl	FALSE	FALSE	TRUE	0.598958
K	Minerals: K	3–4m	Postnatal	0.268129	-26.7365	27.2728	0.491207	0.984372	0.984372	primiparity;m_bmiincl;m_hbincl;GWG;w_age;m_heightincl;m_muacincl	FALSE
Ca	Minerals: Ca	3–4m	Prenatal	0.213324	-13.7091	14.1358	0.470363	0.97585	0.97585	primiparity;code_bep_n;m_bmiincl;ga_days_incl;GWG;w_age;m_heightincl;m_muacincl	FALSE
DSLNT_nmol.mL	HMOs: DSLNT_nmol.mL	3–4m	Prenatal	7.14901	-23.3747	37.6727	0.465904	0.643707	0.860844	primiparity;code_bep_n;m_bmiincl;m_hbincl;ga_days_incl;GWG;w_age;m_muacincl	FALSE	TRUE	FALSE	0.675926
FAD	Vitamins: FAD	14–21d	Prenatal	6.61121	-22.0841	35.3065	0.465013	0.649033	0.946486	primiparity;code_bep_n;m_bmiincl;m_hbincl;ga_days_incl;GWG;w_age;m_heightincl;m_muacincl	FALSE
B3	Vitamins: B3	14–21d	Postnatal	320.757	80.2811	561.234	4	0.00929233	0.0219637	primiparity;m_bmiincl;w_age;m_muacincl	TRUE	FALSE	TRUE	0.855263
Nufa	Vitamins: Nufa	14–21d	Postnatal	152.337	111.757	192.917	4	8.36747e-12	1.08777e-10	m_muacincl	TRUE	FALSE	TRUE	0.905594
Mg	Minerals: Mg	1–2m	Pre+Postnatal	0.159026	-2.32908	2.64713	0.449712	0.899579	0.899579	primiparity;code_bep_n;m_bmiincl;ga_days_incl;GWG;w_age;m_heightincl	FALSE
FGF.21	Bioactive proteins: FGF.21	1–2m	Prenatal	5.30317	-9.92938	20.5357	0.44382	0.49213	0.811758	primiparity;m_bmiincl;m_hbincl;GWG;m_muacincl	FALSE
TMP	Vitamins: TMP	1–2m	Pre+Postnatal	6.32358	-14.7516	27.3988	0.433301	0.553924	0.600084	m_bmiincl;m_hbincl;ga_days_incl;GWG;w_age;m_muacincl	FALSE
Mo	Minerals: Mo	3–4m	Postnatal	0.114979	-0.867875	1.09783	0.432959	0.817482	0.984372	primiparity;code_bep_n;m_bmiincl;m_hbincl;ga_days_incl;GWG;w_age;m_heightincl;m_muacincl	FALSE
LNnT_nmol.mL	HMOs: LNnT_nmol.mL	1–2m	Pre+Postnatal	6.33938	-64.7652	77.4439	0.422826	0.860297	0.960378	primiparity;code_bep_n;m_bmiincl;m_hbincl;ga_days_incl;GWG;w_age;m_heightincl;m_muacincl	FALSE
LNFP.III_nmol.mL	HMOs: LNFP.III_nmol.mL	14–21d	Prenatal	6.30308	-3.94229	16.5485	0.420895	0.225545	0.767011	primiparity;code_bep_n;m_bmiincl;m_hbincl;ga_days_incl;GWG;w_age;m_heightincl;m_muacincl	FALSE
LH	Bioactive proteins: LH	3–4m	Pre+Postnatal	4.97572	-2.28992	12.2414	0.415752	0.177878	0.297449	m_bmiincl;GWG;w_age;m_muacincl	FALSE
Mn	Minerals: Mn	3–4m	Pre+Postnatal	0.0638486	-0.985225	1.11292	0.413513	0.904357	0.936286	primiparity;code_bep_n;m_bmiincl;m_hbincl;ga_days_incl;GWG;w_age;m_heightincl;m_muacincl	FALSE
As	Minerals: As	14–21d	Postnatal	0.0619032	-0.244175	0.367982	0.412773	0.689861	0.951045	primiparity;code_bep_n;m_bmiincl;m_hbincl;ga_days_incl;GWG;w_age;m_heightincl;m_muacincl	FALSE
LSTb_nmol.mL	HMOs: LSTb_nmol.mL	1–2m	Pre+Postnatal	6.05822	-12.7667	24.8831	0.407866	0.525554	0.893323	primiparity;m_bmiincl;ga_days_incl;GWG;w_age;m_heightincl;m_muacincl	FALSE	TRUE	FALSE	0.652047
As	Minerals: As	14–21d	Pre+Postnatal	0.0444927	-0.209527	0.298513	0.406151	0.72942	0.883261	primiparity;code_bep_n;m_bmiincl;m_hbincl;ga_days_incl;GWG;w_age;m_heightincl;m_muacincl	FALSE
Mn	Minerals: Mn	3–4m	Postnatal	0.032213	-0.880762	0.945188	0.401481	0.944505	0.984372	m_bmiincl;m_hbincl;ga_days_incl;GWG;w_age;m_heightincl;m_muacincl	FALSE
LNH_nmol.mL	HMOs: LNH_nmol.mL	1–2m	Prenatal	5.91961	-34.798	46.6372	0.400491	0.774057	0.964827	primiparity;m_bmiincl;m_hbincl;GWG;w_age	FALSE	TRUE	FALSE	0.732639
DFLNH_nmol.mL	HMOs: DFLNH_nmol.mL	3–4m	Pre+Postnatal	5.82977	-12.7626	24.4222	0.395711	0.536185	0.609302	primiparity;m_bmiincl;ga_days_incl;GWG;w_age;m_muacincl	FALSE
FGF.21	Bioactive proteins: FGF.21	14–21d	Postnatal	4.68934	-33.2401	42.6188	0.391203	0.807283	0.872153	primiparity;m_bmiincl;m_hbincl;ga_days_incl;GWG;w_age;m_heightincl;m_muacincl	FALSE
Nufa	Vitamins: Nufa	14–21d	Postnatal	152.337	111.757	192.917	4	8.36747e-12	1.08777e-10	m_muacincl	TRUE	TRUE	TRUE	0.855263
PA	Vitamins: PA	14–21d	Postnatal	1460.35	1080.4	1840.3	4	3.13955e-12	8.16282e-11	m_bmiincl	TRUE	TRUE	TRUE	0.905594
As	Minerals: As	3–4m	Pre+Postnatal	-0.00790273	-0.203075	0.187269	0.386224	0.936286	0.936286	m_bmiincl;m_hbincl;ga_days_incl;GWG;w_age;m_heightincl;m_muacincl	FALSE
LH	Bioactive proteins: LH	3–4m	Postnatal	4.62646	-5.04138	14.2943	0.385814	0.345898	0.778186	primiparity;m_bmiincl;w_age;m_muacincl	FALSE
As	Minerals: As	3–4m	Postnatal	-0.0425205	-0.213541	0.1285	0.373057	0.623899	0.984372	primiparity;code_bep_n;m_bmiincl;m_hbincl;ga_days_incl;GWG;w_age;m_heightincl;m_muacincl	FALSE
Mo	Minerals: Mo	14–21d	Postnatal	-0.0455064	-1.50809	1.41708	0.371922	0.951045	0.951045	code_bep_n;m_bmiincl;m_hbincl;ga_days_incl;m_muacincl	FALSE
Insulin	Bioactive proteins: Insulin	3–4m	Prenatal	4.45587	-1.07085	9.98259	0.371191	0.113084	0.307896	primiparity;m_bmiincl;m_heightincl;m_muacincl	FALSE
X3.SL_nmol.mL	HMOs: X3.SL_nmol.mL	14–21d	Pre+Postnatal	5.26815	-74.2441	84.7804	0.365829	0.895903	0.955819	primiparity;code_bep_n;m_bmiincl;m_hbincl;ga_days_incl;GWG;w_age;m_heightincl;m_muacincl	FALSE
LH	Bioactive proteins: LH	1–2m	Pre+Postnatal	4.29394	-4.35299	12.9409	0.357311	0.32781	0.648394	m_bmiincl;m_hbincl;ga_days_incl;GWG;w_age;m_heightincl;m_muacincl	FALSE
T	Vitamins: T	3–4m	Postnatal	5.63007	-3.22651	14.4867	0.356841	0.211055	0.338703	m_bmiincl;m_heightincl;m_muacincl	FALSE	FALSE	TRUE	0.945
B6	Vitamins: B6	14–21d	Prenatal	5.62876	-3.76399	15.0215	0.356696	0.237767	0.591344	primiparity;m_bmiincl;GWG;m_heightincl;m_muacincl	FALSE	FALSE	TRUE	0.905594
B6	Vitamins: B6	14–21d	Prenatal	5.62876	-3.76399	15.0215	0.356696	0.237767	0.591344	primiparity;m_bmiincl;GWG;m_heightincl;m_muacincl	FALSE	FALSE	TRUE	0.855263
As	Minerals: As	3–4m	Prenatal	-0.0884194	-0.249408	0.0725693	0.355601	0.279091	0.604697	m_bmiincl;m_hbincl;w_age;m_heightincl;m_muacincl	FALSE
Cr	Minerals: Cr	3–4m	Postnatal	-0.0894984	-4.87209	4.69309	0.35519	0.97055	0.984372	primiparity;code_bep_n;m_bmiincl;m_hbincl;ga_days_incl;w_age;m_heightincl;m_muacincl	FALSE
As	Minerals: As	14–21d	Prenatal	-0.0954155	-0.293336	0.102505	0.35294	0.341616	0.783731	primiparity;code_bep_n;m_bmiincl;m_hbincl;ga_days_incl;GWG;w_age;m_heightincl;m_muacincl	FALSE
PA	Vitamins: PA	14–21d	Postnatal	1460.35	1080.4	1840.3	4	3.13955e-12	8.16282e-11	m_bmiincl	TRUE	TRUE	TRUE	0.855263
NMN	Vitamins: NMN	1–2m	Pre+Postnatal	190.215	76.6373	303.793	4	0.00118008	0.00613643		TRUE
CARBOHYDRATE	Macronutrients: CARBOHYDRATE	1–2m	Pre+Postnatal	-0.0153835	-0.113802	0.0830353	0.337984	0.75769	0.75769	primiparity;code_bep_n;m_hbincl;ga_days_incl;GWG;w_age;m_heightincl;m_muacincl	FALSE
PROTEIN	Macronutrients: PROTEIN	3–4m	Postnatal	-0.015502	-0.11151	0.0805056	0.336266	0.750086	0.881876	primiparity;code_bep_n;m_bmiincl;m_hbincl;ga_days_incl;GWG;w_age;m_heightincl;m_muacincl	FALSE
Mo	Minerals: Mo	3–4m	Prenatal	-0.178163	-1.11897	0.762646	0.321468	0.708382	0.808074	primiparity;code_bep_n;m_bmiincl;ga_days_incl;GWG;w_age;m_heightincl;m_muacincl	FALSE
As	Minerals: As	1–2m	Postnatal	-0.184727	-0.620037	0.250584	0.318972	0.403074	0.612869	primiparity;m_bmiincl;m_hbincl;GWG;w_age;m_muacincl	FALSE
DSLNT_nmol.mL	HMOs: DSLNT_nmol.mL	14–21d	Prenatal	4.24738	-57.7462	66.241	0.311516	0.89231	0.89231	primiparity;code_bep_n;m_bmiincl;m_hbincl;ga_days_incl;GWG;w_age;m_heightincl;m_muacincl	FALSE
DSLNT_nmol.mL	HMOs: DSLNT_nmol.mL	1–2m	Postnatal	4.20969	-25.8122	34.2316	0.309511	0.782157	0.98932	primiparity;m_bmiincl;w_age;m_heightincl;m_muacincl	FALSE
NR	Vitamins: NR	1–2m	Pre+Postnatal	203.487	61.1825	345.792	4	0.00539097	0.0233609	m_hbincl;GWG;w_age;m_heightincl	TRUE
Nufa	Vitamins: Nufa	1–2m	Pre+Postnatal	110.928	69.5065	152.349	4	4.44832e-07	5.78282e-06		TRUE	TRUE	TRUE	0.853801
Se	Minerals: Se	1–2m	Prenatal	-0.238209	-1.15682	0.680404	0.298631	0.608644	0.789357	code_bep_n;m_bmiincl;ga_days_incl;GWG;w_age;m_heightincl;m_muacincl	FALSE
FAD	Vitamins: FAD	3–4m	Pre+Postnatal	5.08984	-26.4851	36.6648	0.29728	0.75037	0.812901	code_bep_n;m_bmiincl;m_hbincl;ga_days_incl;GWG;m_heightincl;m_muacincl	FALSE	TRUE	FALSE	0.617647
As	Minerals: As	1–2m	Prenatal	-0.278556	-0.748894	0.191783	0.283286	0.243356	0.694224	primiparity;m_bmiincl;m_hbincl;GWG	FALSE
FAT	Macronutrients: FAT	14–21d	Postnatal	-0.0197912	-0.412456	0.372874	0.274094	0.92077	0.933771	primiparity;code_bep_n;m_bmiincl;m_hbincl;ga_days_incl;GWG;w_age;m_heightincl;m_muacincl	FALSE
Nufa	Vitamins: Nufa	1–2m	Pre+Postnatal	110.928	69.5065	152.349	4	4.44832e-07	5.78282e-06		TRUE	FALSE	TRUE	0.890476
PA	Vitamins: PA	1–2m	Pre+Postnatal	1356.35	1025.22	1687.47	4	2.30758e-13	5.9997e-12		TRUE	TRUE	TRUE	0.853801
PA	Vitamins: PA	1–2m	Pre+Postnatal	1356.35	1025.22	1687.47	4	2.30758e-13	5.9997e-12		TRUE	TRUE	TRUE	0.597222
PL	Vitamins: PL	14–21d	Prenatal	4.81918	-4.26559	13.904	0.267439	0.295672	0.591344	primiparity;m_bmiincl;GWG;w_age;m_heightincl;m_muacincl	FALSE	FALSE	TRUE	0.905594
LNH_nmol.mL	HMOs: LNH_nmol.mL	3–4m	Postnatal	3.37907	-22.784	29.5421	0.265316	0.798895	0.996267	primiparity;code_bep_n;m_bmiincl;m_hbincl;ga_days_incl;GWG;w_age;m_heightincl	FALSE	FALSE	TRUE	0.598958
As	Minerals: As	1–2m	Pre+Postnatal	-0.326568	-0.751627	0.0984921	0.265025	0.130983	0.244389	m_bmiincl;m_hbincl;GWG	FALSE
Mo	Minerals: Mo	3–4m	Pre+Postnatal	-0.344015	-1.24208	0.554046	0.258389	0.45	0.73125	primiparity;code_bep_n;m_bmiincl;m_hbincl;GWG;w_age;m_heightincl	FALSE
CARBOHYDRATE	Macronutrients: CARBOHYDRATE	14–21d	Pre+Postnatal	-0.0211154	-0.167736	0.125505	0.254899	0.776151	0.874587	primiparity;code_bep_n;m_hbincl;ga_days_incl;GWG;w_age;m_heightincl	FALSE
FSH	Bioactive proteins: FSH	1–2m	Pre+Postnatal	3.08529	-14.4986	20.6692	0.253708	0.729126	0.999712	primiparity;code_bep_n;m_bmiincl;m_hbincl;ga_days_incl;GWG;w_age;m_muacincl	FALSE
DSLNT_nmol.mL	HMOs: DSLNT_nmol.mL	3–4m	Pre+Postnatal	3.12321	-24.1062	30.3526	0.251702	0.820862	0.820862	primiparity;code_bep_n;m_bmiincl;ga_days_incl;GWG;w_age;m_heightincl;m_muacincl	FALSE	TRUE	FALSE	0.675926
PROTEIN	Macronutrients: PROTEIN	14–21d	Postnatal	-0.0216134	-0.117207	0.0739808	0.247681	0.655623	0.933771	m_bmiincl;ga_days_incl;w_age;m_heightincl;m_muacincl	FALSE
Mn	Minerals: Mn	3–4m	Prenatal	-0.420361	-1.43059	0.589866	0.229353	0.411705	0.669021	primiparity;m_bmiincl;m_hbincl;GWG;m_heightincl;m_muacincl	FALSE
LNFP.III_nmol.mL	HMOs: LNFP.III_nmol.mL	14–21d	Postnatal	2.59491	-6.61865	11.8085	0.223593	0.578592	0.804703	primiparity;code_bep_n;m_bmiincl;m_hbincl;ga_days_incl;GWG;w_age;m_heightincl;m_muacincl	FALSE
LSTb_nmol.mL	HMOs: LSTb_nmol.mL	1–2m	Prenatal	2.5919	-17.5853	22.7691	0.223433	0.799734	0.964827	primiparity;code_bep_n;m_bmiincl;m_hbincl;ga_days_incl;GWG;w_age;m_muacincl	FALSE	TRUE	FALSE	0.652047
Se	Minerals: Se	14–21d	Prenatal	-0.462323	-2.31532	1.39068	0.213393	0.6221	0.783731	primiparity;code_bep_n;m_bmiincl;m_hbincl;ga_days_incl;GWG;w_age;m_heightincl;m_muacincl	FALSE	FALSE	TRUE	0.617544
Se	Minerals: Se	14–21d	Prenatal	-0.462323	-2.31532	1.39068	0.213393	0.6221	0.783731	primiparity;code_bep_n;m_bmiincl;m_hbincl;ga_days_incl;GWG;w_age;m_heightincl;m_muacincl	FALSE	TRUE	FALSE	0.700405
Se	Minerals: Se	14–21d	Prenatal	-0.462323	-2.31532	1.39068	0.213393	0.6221	0.783731	primiparity;code_bep_n;m_bmiincl;m_hbincl;ga_days_incl;GWG;w_age;m_heightincl;m_muacincl	FALSE	FALSE	TRUE	0.611111
CARBOHYDRATE	Macronutrients: CARBOHYDRATE	1–2m	Prenatal	-0.0241342	-0.127597	0.079329	0.211142	0.64507	0.64507	primiparity;code_bep_n;m_hbincl;ga_days_incl;GWG;w_age;m_heightincl;m_muacincl	FALSE
LSTc_nmol.mL	HMOs: LSTc_nmol.mL	3–4m	Postnatal	1.71833	-25.647	29.0837	0.176952	0.901421	0.996267	primiparity;code_bep_n;ga_days_incl;GWG;w_age;m_muacincl	FALSE	FALSE	TRUE	0.646154
Se	Minerals: Se	3–4m	Prenatal	-0.563079	-1.20806	0.0819061	0.175073	0.0864989	0.436395	m_bmiincl;m_muacincl	FALSE	TRUE	TRUE	0.619048
Se	Minerals: Se	3–4m	Prenatal	-0.563079	-1.20806	0.0819061	0.175073	0.0864989	0.436395	m_bmiincl;m_muacincl	FALSE	TRUE	TRUE	0.577778
Se	Minerals: Se	3–4m	Prenatal	-0.563079	-1.20806	0.0819061	0.175073	0.0864989	0.436395	m_bmiincl;m_muacincl	FALSE	TRUE	TRUE	0.636829
Mo	Minerals: Mo	1–2m	Pre+Postnatal	-0.598645	-2.37242	1.17513	0.161545	0.50553	0.657189	primiparity;code_bep_n;m_bmiincl;m_hbincl;ga_days_incl;GWG;w_age	FALSE
FAD	Vitamins: FAD	14–21d	Pre+Postnatal	3.75624	-21.6659	29.1784	0.150248	0.770474	0.877355	primiparity;code_bep_n;m_bmiincl;ga_days_incl;GWG;w_age;m_heightincl;m_muacincl	FALSE
T	Vitamins: T	3–4m	Pre+Postnatal	3.74616	-5.9654	13.4577	0.149137	0.446845	0.580899	m_bmiincl;m_hbincl;ga_days_incl;GWG;w_age;m_heightincl;m_muacincl	FALSE	FALSE	TRUE	0.945
LNFP.III_nmol.mL	HMOs: LNFP.III_nmol.mL	14–21d	Pre+Postnatal	1.19337	-13.5278	15.9145	0.14902	0.872818	0.955819	primiparity;code_bep_n;m_bmiincl;m_hbincl;ga_days_incl;GWG;w_age;m_heightincl;m_muacincl	FALSE
Mo	Minerals: Mo	1–2m	Postnatal	-0.637513	-2.20995	0.934921	0.146763	0.424294	0.612869	primiparity;code_bep_n;m_bmiincl;m_hbincl;ga_days_incl;GWG;w_age;m_heightincl;m_muacincl	FALSE
FLNH_nmol.mL	HMOs: FLNH_nmol.mL	3–4m	Postnatal	1.1314	-28.4993	30.7621	0.145723	0.939949	0.996267	primiparity;code_bep_n;m_bmiincl;m_hbincl;ga_days_incl;GWG;w_age;m_heightincl;m_muacincl	FALSE	TRUE	FALSE	0.598958
PA	Vitamins: PA	1–2m	Pre+Postnatal	1356.35	1025.22	1687.47	4	2.30758e-13	5.9997e-12		TRUE	TRUE	TRUE	0.890476
PA	Vitamins: PA	1–2m	Prenatal	366.987	114.806	619.168	4	0.00467085	0.121442	code_bep_n;ga_days_incl;GWG;w_age;m_muacincl	TRUE	TRUE	TRUE	0.853801
PA	Vitamins: PA	1–2m	Prenatal	366.987	114.806	619.168	4	0.00467085	0.121442	code_bep_n;ga_days_incl;GWG;w_age;m_muacincl	TRUE	TRUE	TRUE	0.597222
LNFP.III_nmol.mL	HMOs: LNFP.III_nmol.mL	1–2m	Prenatal	0.953836	-2.94803	4.85571	0.136275	0.629407	0.964827	primiparity;m_bmiincl;m_hbincl;w_age;m_muacincl	FALSE
DFLNH_nmol.mL	HMOs: DFLNH_nmol.mL	1–2m	Postnatal	0.862915	-19.5252	21.2511	0.131438	0.933474	0.98932	primiparity;code_bep_n;m_bmiincl;m_hbincl;ga_days_incl;w_age;m_muacincl	FALSE	TRUE	FALSE	0.652047
Cu	Minerals: Cu	3–4m	Postnatal	-0.679879	-29.6296	28.2698	0.13065	0.963047	0.984372	primiparity;code_bep_n;m_hbincl;GWG;w_age;m_heightincl;m_muacincl	FALSE
Insulin	Bioactive proteins: Insulin	3–4m	Pre+Postnatal	1.57544	-3.00201	6.1529	0.124287	0.497183	0.497183	primiparity;code_bep_n;m_bmiincl;m_hbincl;ga_days_incl;GWG;w_age;m_muacincl	FALSE
TMP	Vitamins: TMP	3–4m	Postnatal	3.44097	-17.6738	24.5558	0.115489	0.747898	0.777814	code_bep_n;m_bmiincl;ga_days_incl;m_heightincl;m_muacincl	FALSE
LSTb_nmol.mL	HMOs: LSTb_nmol.mL	3–4m	Prenatal	0.557005	-12.5049	13.6189	0.115161	0.932859	0.932859	code_bep_n;m_bmiincl;m_hbincl;ga_days_incl;GWG;w_age;m_heightincl;m_muacincl	FALSE
LNFP.III_nmol.mL	HMOs: LNFP.III_nmol.mL	3–4m	Prenatal	0.517531	-3.35866	4.39372	0.113061	0.791977	0.860844	primiparity;code_bep_n;m_bmiincl;m_hbincl;ga_days_incl;GWG;w_age;m_muacincl	FALSE
Diversity	HMOs: Diversity	14–21d	Pre+Postnatal	0.47759	-0.11417	1.06935	0.110936	0.112791	0.31331	ga_days_incl;w_age	FALSE
Diversity	HMOs: Diversity	14–21d	Postnatal	0.366348	-0.228778	0.961474	0.105017	0.225745	0.804703	m_bmiincl;w_age;m_muacincl	FALSE
Diversity	HMOs: Diversity	3–4m	Pre+Postnatal	0.359505	-0.134979	0.85399	0.104653	0.152793	0.357509	primiparity;m_hbincl;GWG;w_age	FALSE
FDSLNH_nmol.mL	HMOs: FDSLNH_nmol.mL	1–2m	Postnatal	0.269527	-39.4453	39.9844	0.0998652	0.98932	0.98932	primiparity;code_bep_n;m_bmiincl;m_hbincl;ga_days_incl;GWG;w_age;m_heightincl;m_muacincl	FALSE
LSTb_nmol.mL	HMOs: LSTb_nmol.mL	1–2m	Postnatal	0.264685	-15.6794	16.2088	0.0996076	0.97388	0.98932	primiparity;code_bep_n;m_bmiincl;ga_days_incl;GWG;w_age;m_heightincl;m_muacincl	FALSE	TRUE	FALSE	0.652047
PROTEIN	Macronutrients: PROTEIN	14–21d	Pre+Postnatal	-0.0319699	-0.134325	0.0703857	0.0975622	0.537702	0.874587	m_bmiincl;ga_days_incl;GWG;w_age;m_muacincl	FALSE
Diversity	HMOs: Diversity	1–2m	Pre+Postnatal	0.126411	-0.392278	0.645101	0.0922504	0.630611	0.893323	primiparity;m_hbincl;ga_days_incl;GWG;w_age;m_muacincl	FALSE
Diversity	HMOs: Diversity	14–21d	Prenatal	0.126038	-0.51546	0.767535	0.0922305	0.697943	0.831497	primiparity;code_bep_n;m_hbincl;ga_days_incl;GWG;w_age;m_heightincl;m_muacincl	FALSE
Diversity	HMOs: Diversity	1–2m	Postnatal	0.0942647	-0.468842	0.657371	0.0905399	0.741321	0.98932	primiparity;m_bmiincl;m_hbincl;GWG;w_age;m_muacincl	FALSE
Evenness	HMOs: Evenness	14–21d	Pre+Postnatal	0.0251363	-0.00600895	0.0562816	0.0868618	0.112791	0.31331	ga_days_incl;w_age	FALSE
Evenness	HMOs: Evenness	14–21d	Postnatal	0.0192815	-0.0120409	0.0506039	0.0865503	0.225745	0.804703	m_bmiincl;w_age;m_muacincl	FALSE
Evenness	HMOs: Evenness	3–4m	Pre+Postnatal	0.0189213	-0.00710417	0.0449469	0.0865311	0.152793	0.357509	primiparity;m_hbincl;GWG;w_age	FALSE
Evenness	HMOs: Evenness	1–2m	Pre+Postnatal	0.00665323	-0.0206462	0.0339527	0.0858783	0.630611	0.893323	primiparity;m_hbincl;ga_days_incl;GWG;w_age;m_muacincl	FALSE
Evenness	HMOs: Evenness	14–21d	Prenatal	0.00663357	-0.0271295	0.0403966	0.0858773	0.697943	0.831497	primiparity;code_bep_n;m_hbincl;ga_days_incl;GWG;w_age;m_heightincl;m_muacincl	FALSE
Evenness	HMOs: Evenness	1–2m	Postnatal	0.0049613	-0.0246759	0.0345985	0.0857883	0.741321	0.98932	primiparity;m_bmiincl;m_hbincl;GWG;w_age;m_muacincl	FALSE
Diversity	HMOs: Diversity	3–4m	Postnatal	0.0012048	-0.50686	0.50927	0.0855884	0.996267	0.996267	primiparity;m_bmiincl;m_hbincl;ga_days_incl;GWG;w_age;m_heightincl;m_muacincl	FALSE
Evenness	HMOs: Evenness	3–4m	Postnatal	6.34104e-05	-0.0266768	0.0268037	0.0855277	0.996267	0.996267	primiparity;m_bmiincl;m_hbincl;ga_days_incl;GWG;w_age;m_heightincl;m_muacincl	FALSE
Secretor	HMOs: Secretor	1–2m	Postnatal	-0.014621	-0.136778	0.107536	0.0847464	0.813408	0.98932	primiparity;code_bep_n;m_bmiincl;m_hbincl;ga_days_incl;GWG	FALSE
Evenness	HMOs: Evenness	1–2m	Prenatal	-0.0171115	-0.0480332	0.0138103	0.0846139	0.275592	0.964827	primiparity;m_bmiincl;m_hbincl;w_age	FALSE
Evenness	HMOs: Evenness	3–4m	Prenatal	-0.0201654	-0.0482472	0.00791651	0.0844514	0.157751	0.621019	primiparity;m_hbincl;w_age	FALSE
Secretor	HMOs: Secretor	14–21d	Postnatal	-0.0240813	-0.149032	0.10087	0.084243	0.703824	0.804703	primiparity;code_bep_n;m_bmiincl;m_hbincl;ga_days_incl;GWG;m_muacincl	FALSE
Secretor	HMOs: Secretor	3–4m	Postnatal	-0.0373012	-0.159553	0.0849509	0.0835396	0.547513	0.996267	primiparity;m_bmiincl;ga_days_incl	FALSE
Secretor	HMOs: Secretor	1–2m	Prenatal	-0.0459712	-0.18478	0.092838	0.0830783	0.51345	0.964827	primiparity;m_bmiincl;w_age;m_muacincl	FALSE
Secretor	HMOs: Secretor	14–21d	Prenatal	-0.0595681	-0.199692	0.0805554	0.0823549	0.401661	0.831497	primiparity;m_bmiincl;ga_days_incl;w_age;m_muacincl	FALSE
Secretor	HMOs: Secretor	3–4m	Prenatal	-0.0710796	-0.20921	0.0670507	0.0817424	0.310421	0.775217	primiparity;m_bmiincl;w_age;m_muacincl	FALSE
Secretor	HMOs: Secretor	1–2m	Pre+Postnatal	-0.0975627	-0.235927	0.0408018	0.0803333	0.165501	0.785089	ga_days_incl;GWG;w_age	FALSE
Secretor	HMOs: Secretor	3–4m	Pre+Postnatal	-0.107018	-0.243465	0.0294298	0.0798302	0.123226	0.357509	GWG;w_age	FALSE
Secretor	HMOs: Secretor	14–21d	Pre+Postnatal	-0.112138	-0.248942	0.0246657	0.0795578	0.107326	0.31331	GWG	FALSE
PA	Vitamins: PA	1–2m	Prenatal	366.987	114.806	619.168	4	0.00467085	0.121442	code_bep_n;ga_days_incl;GWG;w_age;m_muacincl	TRUE	TRUE	TRUE	0.890476
NAM	Vitamins: NAM	1–2m	Postnatal	78.4202	32.3867	124.454	4	0.000960402	0.00312131	w_age	TRUE
DFLNH_nmol.mL	HMOs: DFLNH_nmol.mL	3–4m	Postnatal	-0.258101	-19.0413	18.5251	0.0717915	0.978373	0.996267	primiparity;code_bep_n;m_bmiincl;ga_days_incl;w_age;m_heightincl;m_muacincl	FALSE
CARBOHYDRATE	Macronutrients: CARBOHYDRATE	3–4m	Prenatal	-0.033751	-0.130411	0.062909	0.0717441	0.490763	0.490763	primiparity;m_bmiincl;GWG;w_age;m_muacincl	FALSE
Insulin	Bioactive proteins: Insulin	3–4m	Postnatal	0.93215	-3.9947	5.859	0.0691453	0.709018	0.778186	primiparity;code_bep_n;m_bmiincl;m_hbincl;GWG;w_age;m_heightincl;m_muacincl	FALSE
Diversity	HMOs: Diversity	1–2m	Prenatal	-0.325118	-0.912631	0.262396	0.0682257	0.275592	0.964827	primiparity;m_bmiincl;m_hbincl;w_age	FALSE
Insulin	Bioactive proteins: Insulin	14–21d	Pre+Postnatal	0.91538	-3.39016	5.22092	0.0677079	0.674697	0.690888	primiparity;code_bep_n;m_bmiincl;m_hbincl;ga_days_incl;GWG;w_age;m_heightincl;m_muacincl	FALSE
TMP	Vitamins: TMP	3–4m	Prenatal	3.00578	-19.779	25.7906	0.0675092	0.79443	0.946605	code_bep_n;m_bmiincl;ga_days_incl;GWG;w_age;m_heightincl;m_muacincl	FALSE
Diversity	HMOs: Diversity	3–4m	Prenatal	-0.383142	-0.916697	0.150414	0.0651384	0.157751	0.621019	primiparity;m_hbincl;w_age	FALSE
DSLNT_nmol.mL	HMOs: DSLNT_nmol.mL	14–21d	Postnatal	-0.458239	-53.2163	52.2998	0.0611427	0.986326	0.986326	primiparity;code_bep_n;m_bmiincl;ga_days_incl;GWG;w_age;m_heightincl;m_muacincl	FALSE
LNFP.III_nmol.mL	HMOs: LNFP.III_nmol.mL	1–2m	Pre+Postnatal	-0.8013	-4.8624	3.2598	0.0428893	0.696973	0.893323	primiparity;code_bep_n;m_bmiincl;m_hbincl;ga_days_incl;GWG;w_age;m_heightincl;m_muacincl	FALSE
LNFP.III_nmol.mL	HMOs: LNFP.III_nmol.mL	1–2m	Postnatal	-0.810727	-4.15602	2.53456	0.0423877	0.632764	0.98932	primiparity;code_bep_n;m_bmiincl;m_hbincl;ga_days_incl;GWG;w_age;m_heightincl;m_muacincl	FALSE
Insulin	Bioactive proteins: Insulin	14–21d	Postnatal	0.507255	-3.58808	4.60259	0.0327243	0.806934	0.872153	primiparity;code_bep_n;m_bmiincl;m_hbincl;ga_days_incl;GWG;w_age;m_heightincl;m_muacincl	FALSE
FSH	Bioactive proteins: FSH	14–21d	Prenatal	0.490856	-19.7583	20.7401	0.0313185	0.961797	0.961797	primiparity;m_bmiincl;m_hbincl;ga_days_incl;GWG;w_age;m_heightincl	FALSE
FAT	Macronutrients: FAT	3–4m	Postnatal	-0.0369388	-0.514911	0.441033	0.0255366	0.878817	0.881876	primiparity;code_bep_n;m_bmiincl;m_hbincl;GWG;w_age;m_heightincl;m_muacincl	FALSE
FLNH_nmol.mL	HMOs: FLNH_nmol.mL	1–2m	Prenatal	-1.27676	-58.4609	55.9073	0.0175911	0.964827	0.964827	primiparity;code_bep_n;m_bmiincl;m_hbincl;GWG;w_age;m_muacincl	FALSE
LH	Bioactive proteins: LH	1–2m	Postnatal	0.326848	-7.31597	7.96966	0.0172601	0.932777	0.932777	primiparity;code_bep_n;m_bmiincl;m_hbincl;ga_days_incl;GWG;w_age;m_heightincl;m_muacincl	FALSE
Mg	Minerals: Mg	14–21d	Prenatal	-0.990398	-4.19542	2.21462	0.0125495	0.541708	0.783731	primiparity;code_bep_n;m_bmiincl;m_hbincl;ga_days_incl;GWG;w_age;m_muacincl	FALSE
X3.SL_nmol.mL	HMOs: X3.SL_nmol.mL	1–2m	Prenatal	-1.45883	-50.5218	47.6042	0.00790371	0.953165	0.964827	primiparity;code_bep_n;m_bmiincl;m_hbincl;ga_days_incl;GWG;w_age;m_heightincl;m_muacincl	FALSE	TRUE	FALSE	0.591787
LNH_nmol.mL	HMOs: LNH_nmol.mL	3–4m	Prenatal	-1.56524	-33.7134	30.5829	0.00224214	0.923369	0.932859	primiparity;code_bep_n;m_bmiincl;m_hbincl;ga_days_incl;GWG;w_age;m_muacincl	FALSE	FALSE	TRUE	0.598958
Insulin	Bioactive proteins: Insulin	1–2m	Pre+Postnatal	0.125488	-4.7058	4.95678	0	0.959105	0.999712	primiparity;code_bep_n;m_bmiincl;m_hbincl;ga_days_incl;GWG;w_age;m_heightincl;m_muacincl	FALSE	TRUE	FALSE	0.601449
Ca	Minerals: Ca	14–21d	Postnatal	-1.02339	-25.0792	23.0324	0	0.933087	0.951045	primiparity;code_bep_n;m_bmiincl;m_hbincl;ga_days_incl;GWG;w_age;m_heightincl;m_muacincl	FALSE
DSLNT_nmol.mL	HMOs: DSLNT_nmol.mL	1–2m	Pre+Postnatal	-1.60738	-33.8422	30.6275	0	0.921585	0.960378	primiparity;code_bep_n;m_bmiincl;m_hbincl;ga_days_incl;GWG;w_age;m_heightincl;m_muacincl	FALSE
Insulin	Bioactive proteins: Insulin	1–2m	Prenatal	0.0235566	-5.59333	5.64044	-0.00873736	0.99339	0.99339	primiparity;code_bep_n;m_bmiincl;m_hbincl;ga_days_incl;GWG;w_age;m_heightincl;m_muacincl	FALSE	TRUE	FALSE	0.601449
FGF.21	Bioactive proteins: FGF.21	1–2m	Pre+Postnatal	-0.00241127	-13.2075	13.2027	-0.0109633	0.999712	0.999712	primiparity;code_bep_n;m_bmiincl;m_hbincl;ga_days_incl;w_age;m_muacincl	FALSE
LNFP.III_nmol.mL	HMOs: LNFP.III_nmol.mL	3–4m	Postnatal	-1.89332	-4.81687	1.03022	-0.0152144	0.202608	0.996267	primiparity;code_bep_n;m_bmiincl;m_hbincl;ga_days_incl;GWG;w_age;m_heightincl;m_muacincl	FALSE
LSTb_nmol.mL	HMOs: LSTb_nmol.mL	3–4m	Postnatal	-1.96715	-12.6256	8.69128	-0.0191425	0.715819	0.996267	primiparity;code_bep_n;m_bmiincl;m_hbincl;ga_days_incl;GWG;w_age;m_heightincl;m_muacincl	FALSE
PROTEIN	Macronutrients: PROTEIN	3–4m	Pre+Postnatal	-0.0404623	-0.10764	0.0267151	-0.0255366	0.235695	0.588385	primiparity;w_age	FALSE
PROTEIN	Macronutrients: PROTEIN	1–2m	Pre+Postnatal	-0.0409113	-0.1361	0.0542775	-0.0320454	0.396892	0.52919	code_bep_n;m_hbincl;w_age;m_muacincl	FALSE
LNFP.III_nmol.mL	HMOs: LNFP.III_nmol.mL	3–4m	Pre+Postnatal	-2.32792	-5.45152	0.795669	-0.0383384	0.142803	0.357509	primiparity;code_bep_n;m_bmiincl;ga_days_incl;GWG;w_age;m_heightincl;m_muacincl	FALSE
Mg	Minerals: Mg	3–4m	Postnatal	-1.1242	-3.35184	1.10344	-0.0383396	0.320293	0.984372	ga_days_incl;w_age;m_heightincl;m_muacincl	FALSE
Cr	Minerals: Cr	14–21d	Postnatal	-1.13541	-5.66169	3.39086	-0.0426053	0.620696	0.951045	primiparity;code_bep_n;m_bmiincl;m_hbincl;ga_days_incl;GWG;w_age;m_heightincl;m_muacincl	FALSE
FGF.21	Bioactive proteins: FGF.21	1–2m	Postnatal	-0.528455	-11.7441	10.6871	-0.0560546	0.925954	0.932777	primiparity;code_bep_n;m_bmiincl;m_hbincl;ga_days_incl;GWG;w_age;m_heightincl;m_muacincl	FALSE
Ribo	Vitamins: Ribo	1–2m	Prenatal	1.78114	-3.75632	7.31861	-0.0675092	0.525578	0.75824	m_bmiincl;m_hbincl;GWG;w_age;m_heightincl;m_muacincl	FALSE	FALSE	TRUE	0.853801
Ribo	Vitamins: Ribo	1–2m	Prenatal	1.78114	-3.75632	7.31861	-0.0675092	0.525578	0.75824	m_bmiincl;m_hbincl;GWG;w_age;m_heightincl;m_muacincl	FALSE	FALSE	TRUE	0.890476
NMN	Vitamins: NMN	1–2m	Postnatal	226.236	120.167	332.306	4	4.19981e-05	0.000272988		TRUE
NR	Vitamins: NR	1–2m	Postnatal	215.067	70.7438	359.39	4	0.00373941	0.0108027	m_hbincl;GWG;w_age;m_heightincl	TRUE
Nufa	Vitamins: Nufa	1–2m	Postnatal	129.387	95.335	163.439	4	3.97291e-12	5.16478e-11		TRUE	TRUE	TRUE	0.853801
PROTEIN	Macronutrients: PROTEIN	1–2m	Postnatal	-0.0448453	-0.123546	0.0338555	-0.0890689	0.262029	0.349372	primiparity;code_bep_n;GWG;w_age;m_heightincl;m_muacincl	FALSE
Insulin	Bioactive proteins: Insulin	1–2m	Postnatal	-0.937724	-5.9465	4.07106	-0.0911363	0.711986	0.932777	primiparity;code_bep_n;m_bmiincl;m_hbincl;ga_days_incl;GWG;w_age;m_heightincl;m_muacincl	FALSE	TRUE	FALSE	0.601449
PLP	Vitamins: PLP	14–21d	Postnatal	1.47311	-0.429253	3.37547	-0.10147	0.128075	0.208122	m_bmiincl;m_hbincl;ga_days_incl;w_age;m_muacincl	FALSE
FGF.21	Bioactive proteins: FGF.21	14–21d	Prenatal	-1.07661	-28.4811	26.3279	-0.103041	0.938122	0.961797	primiparity;code_bep_n;m_bmiincl;m_hbincl;ga_days_incl;GWG;w_age;m_heightincl;m_muacincl	FALSE
PLP	Vitamins: PLP	14–21d	Prenatal	1.43192	-0.75614	3.61998	-0.106012	0.197561	0.570731	primiparity;m_bmiincl;ga_days_incl;GWG;m_muacincl	FALSE
Insulin	Bioactive proteins: Insulin	14–21d	Prenatal	-1.21749	-5.90968	3.47469	-0.115118	0.608403	0.961797	code_bep_n;m_bmiincl;GWG;w_age;m_heightincl;m_muacincl	FALSE
FSH	Bioactive proteins: FSH	14–21d	Postnatal	-1.25014	-16.5779	14.0776	-0.117916	0.872153	0.872153	primiparity;code_bep_n;m_bmiincl;m_hbincl;ga_days_incl;GWG;w_age;m_heightincl	FALSE
Bio	Vitamins: Bio	14–21d	Pre+Postnatal	1.29753	-0.315339	2.91041	-0.120828	0.113893	0.197415	code_bep_n;m_bmiincl;m_hbincl;GWG;w_age;m_heightincl;m_muacincl	FALSE
LNnT_nmol.mL	HMOs: LNnT_nmol.mL	1–2m	Prenatal	-3.88436	-84.7377	76.969	-0.121152	0.924398	0.964827	primiparity;code_bep_n;m_bmiincl;m_hbincl;ga_days_incl;GWG;w_age;m_heightincl;m_muacincl	FALSE
DSLNT_nmol.mL	HMOs: DSLNT_nmol.mL	14–21d	Pre+Postnatal	-4.03167	-61.0222	52.9589	-0.12899	0.888898	0.955819	primiparity;code_bep_n;m_bmiincl;m_hbincl;ga_days_incl;GWG;w_age;m_heightincl;m_muacincl	FALSE
PLP	Vitamins: PLP	14–21d	Pre+Postnatal	1.21234	-0.489566	2.91425	-0.13022	0.161127	0.246429	primiparity;m_bmiincl;ga_days_incl;GWG;m_muacincl	FALSE
DFLac_nmol.mL	HMOs: DFLac_nmol.mL	1–2m	Pre+Postnatal	-4.06945	-165.769	157.63	-0.131	0.960378	0.960378	primiparity;code_bep_n;m_bmiincl;ga_days_incl;GWG;w_age;m_heightincl;m_muacincl	FALSE
PL	Vitamins: PL	3–4m	Prenatal	1.18167	-8.68621	11.0495	-0.133602	0.813012	0.946605	primiparity;code_bep_n;m_bmiincl;m_hbincl;ga_days_incl;GWG;w_age;m_muacincl	FALSE	FALSE	TRUE	0.969136
PL	Vitamins: PL	3–4m	Prenatal	1.18167	-8.68621	11.0495	-0.133602	0.813012	0.946605	primiparity;code_bep_n;m_bmiincl;m_hbincl;ga_days_incl;GWG;w_age;m_muacincl	FALSE	FALSE	TRUE	0.945
FLNH_nmol.mL	HMOs: FLNH_nmol.mL	1–2m	Postnatal	-4.12501	-50.6599	42.4098	-0.133957	0.861209	0.98932	primiparity;code_bep_n;m_bmiincl;m_hbincl;ga_days_incl;GWG;w_age;m_heightincl;m_muacincl	FALSE
B6	Vitamins: B6	3–4m	Prenatal	1.03645	-8.93888	11.0118	-0.149613	0.837382	0.946605	primiparity;code_bep_n;m_bmiincl;m_hbincl;ga_days_incl;GWG;w_age;m_muacincl	FALSE	FALSE	TRUE	0.969136
B6	Vitamins: B6	3–4m	Prenatal	1.03645	-8.93888	11.0118	-0.149613	0.837382	0.946605	primiparity;code_bep_n;m_bmiincl;m_hbincl;ga_days_incl;GWG;w_age;m_muacincl	FALSE	FALSE	TRUE	0.945
Mn	Minerals: Mn	14–21d	Prenatal	-1.43027	-3.46212	0.601577	-0.154748	0.165948	0.783731	primiparity;m_bmiincl;w_age;m_heightincl;m_muacincl	FALSE
X6.SL_nmol.mL	HMOs: X6.SL_nmol.mL	1–2m	Pre+Postnatal	-4.7136	-137.639	128.212	-0.165274	0.944197	0.960378	primiparity;code_bep_n;ga_days_incl;GWG;w_age;m_heightincl;m_muacincl	FALSE
Ribo	Vitamins: Ribo	3–4m	Prenatal	0.877864	-2.84077	4.5965	-0.167097	0.641099	0.946605	primiparity;code_bep_n;m_bmiincl;m_hbincl;ga_days_incl;GWG;m_heightincl;m_muacincl	FALSE	FALSE	TRUE	0.969136
Ribo	Vitamins: Ribo	3–4m	Prenatal	0.877864	-2.84077	4.5965	-0.167097	0.641099	0.946605	primiparity;code_bep_n;m_bmiincl;m_hbincl;ga_days_incl;GWG;m_heightincl;m_muacincl	FALSE	TRUE	TRUE	0.945
FSH	Bioactive proteins: FSH	3–4m	Postnatal	-1.89928	-15.1992	11.4006	-0.173559	0.778186	0.778186	primiparity;m_bmiincl;m_hbincl;w_age;m_heightincl;m_muacincl	FALSE
PLP	Vitamins: PLP	1–2m	Pre+Postnatal	0.799138	-0.490673	2.08895	-0.175777	0.222641	0.289434	primiparity;GWG;m_muacincl	FALSE
FMN	Vitamins: FMN	3–4m	Prenatal	0.729602	-1.16461	2.62381	-0.183443	0.447287	0.946605	primiparity;m_bmiincl;m_hbincl;w_age;m_muacincl	FALSE	FALSE	TRUE	0.969136
FMN	Vitamins: FMN	3–4m	Prenatal	0.729602	-1.16461	2.62381	-0.183443	0.447287	0.946605	primiparity;m_bmiincl;m_hbincl;w_age;m_muacincl	FALSE	FALSE	TRUE	0.945
AlphaTocopherol	Vitamins: AlphaTocopherol	14–21d	Postnatal	0.692852	-0.926025	2.31173	-0.187495	0.398953	0.518639	primiparity;code_bep_n;m_bmiincl;m_hbincl;ga_days_incl;GWG;w_age;m_heightincl;m_muacincl	FALSE
DFLNH_nmol.mL	HMOs: DFLNH_nmol.mL	1–2m	Pre+Postnatal	-5.36423	-27.2177	16.4893	-0.199892	0.628144	0.893323	primiparity;code_bep_n;m_bmiincl;m_hbincl;ga_days_incl;GWG;w_age;m_muacincl	FALSE	TRUE	FALSE	0.652047
Nufa	Vitamins: Nufa	3–4m	Prenatal	0.566526	-30.376	31.5091	-0.201422	0.971145	0.971145	primiparity;code_bep_n;m_bmiincl;m_hbincl;ga_days_incl;GWG;w_age;m_heightincl;m_muacincl	FALSE	TRUE	TRUE	0.969136
Nufa	Vitamins: Nufa	3–4m	Prenatal	0.566526	-30.376	31.5091	-0.201422	0.971145	0.971145	primiparity;code_bep_n;m_bmiincl;m_hbincl;ga_days_incl;GWG;w_age;m_heightincl;m_muacincl	FALSE	TRUE	TRUE	0.945
FMN	Vitamins: FMN	1–2m	Prenatal	0.551968	-1.28929	2.39323	-0.203027	0.554098	0.75824	primiparity;m_hbincl;GWG;m_heightincl	FALSE	FALSE	TRUE	0.853801
FMN	Vitamins: FMN	1–2m	Prenatal	0.551968	-1.28929	2.39323	-0.203027	0.554098	0.75824	primiparity;m_hbincl;GWG;m_heightincl	FALSE	FALSE	TRUE	0.890476
AlphaTocopherol	Vitamins: AlphaTocopherol	14–21d	Pre+Postnatal	0.540157	-1.19419	2.2745	-0.20433	0.538865	0.700525	primiparity;code_bep_n;m_hbincl;GWG;w_age;m_heightincl;m_muacincl	FALSE
LSTb_nmol.mL	HMOs: LSTb_nmol.mL	14–21d	Prenatal	-5.60147	-39.6259	28.4229	-0.212515	0.744991	0.831497	primiparity;code_bep_n;m_bmiincl;m_hbincl;ga_days_incl;GWG;w_age;m_heightincl;m_muacincl	FALSE
PLP	Vitamins: PLP	1–2m	Postnatal	0.398751	-0.746654	1.54416	-0.21992	0.492674	0.609977	primiparity;m_bmiincl;m_hbincl;GWG;w_age;m_muacincl	FALSE
B1	Vitamins: B1	3–4m	Prenatal	0.388896	-17.5321	18.3099	-0.221006	0.965803	0.971145	primiparity;code_bep_n;m_bmiincl;m_hbincl;ga_days_incl;GWG;w_age;m_heightincl;m_muacincl	FALSE
AlphaTocopherol	Vitamins: AlphaTocopherol	3–4m	Postnatal	0.359015	-0.64244	1.36047	-0.224301	0.479811	0.567049	primiparity;code_bep_n;m_bmiincl;GWG;w_age;m_heightincl;m_muacincl	FALSE
Bio	Vitamins: Bio	3–4m	Pre+Postnatal	0.251856	-1.0215	1.52521	-0.236115	0.696261	0.787835	primiparity;code_bep_n;m_bmiincl;m_hbincl;ga_days_incl;GWG;w_age;m_heightincl;m_muacincl	FALSE
T	Vitamins: T	14–21d	Prenatal	0.228991	-4.19713	4.65511	-0.238636	0.918578	0.946486	primiparity;code_bep_n;m_bmiincl;m_hbincl;ga_days_incl;GWG;m_heightincl;m_muacincl	FALSE	TRUE	TRUE	0.905594
T	Vitamins: T	14–21d	Prenatal	0.228991	-4.19713	4.65511	-0.238636	0.918578	0.946486	primiparity;code_bep_n;m_bmiincl;m_hbincl;ga_days_incl;GWG;m_heightincl;m_muacincl	FALSE	FALSE	TRUE	0.855263
PLP	Vitamins: PLP	3–4m	Postnatal	0.170893	-0.682867	1.02465	-0.245041	0.693005	0.750756	primiparity;code_bep_n;m_bmiincl;m_hbincl;ga_days_incl;w_age;m_heightincl;m_muacincl	FALSE	FALSE	TRUE	0.969136
PLP	Vitamins: PLP	1–2m	Prenatal	0.169632	-1.40071	1.73998	-0.24518	0.83108	0.939481	code_bep_n;m_bmiincl;m_hbincl;w_age;m_heightincl;m_muacincl	FALSE
Bio	Vitamins: Bio	14–21d	Prenatal	0.162495	-1.58803	1.91302	-0.245967	0.854469	0.946486	primiparity;code_bep_n;m_bmiincl;m_hbincl;ga_days_incl;GWG;w_age;m_muacincl	FALSE
PM	Vitamins: PM	14–21d	Postnatal	0.145527	-0.0157356	0.30679	-0.247838	0.076585	0.142229	m_bmiincl;m_hbincl;m_muacincl	FALSE
Mn	Minerals: Mn	14–21d	Postnatal	-1.6811	-3.56885	0.206644	-0.250147	0.0804901	0.368197	primiparity;m_bmiincl;w_age;m_heightincl;m_muacincl	FALSE
GamaTocopherol	Vitamins: GamaTocopherol	14–21d	Pre+Postnatal	0.109083	-0.0829688	0.301135	-0.251856	0.263267	0.380275	m_bmiincl;ga_days_incl;m_muacincl	FALSE
Nufa	Vitamins: Nufa	1–2m	Postnatal	129.387	95.335	163.439	4	3.97291e-12	5.16478e-11		TRUE	FALSE	TRUE	0.890476
GamaTocopherol	Vitamins: GamaTocopherol	14–21d	Prenatal	0.0820938	-0.108287	0.272474	-0.254832	0.394937	0.684557	primiparity;code_bep_n;m_bmiincl;ga_days_incl;GWG;m_heightincl;m_muacincl	FALSE
PA	Vitamins: PA	1–2m	Postnatal	1818.63	1496.38	2140.88	4	9.63675e-22	2.50556e-20		TRUE	TRUE	TRUE	0.853801
AlphaTocopherol	Vitamins: AlphaTocopherol	14–21d	Prenatal	0.0664496	-1.50829	1.64119	-0.256557	0.933546	0.946486	primiparity;code_bep_n;m_bmiincl;m_hbincl;ga_days_incl;GWG;w_age;m_heightincl;m_muacincl	FALSE
X3.SL_nmol.mL	HMOs: X3.SL_nmol.mL	3–4m	Prenatal	-6.43471	-45.9318	33.0624	-0.25685	0.747604	0.860844	primiparity;code_bep_n;m_bmiincl;m_hbincl;ga_days_incl;GWG;m_heightincl;m_muacincl	FALSE
PN	Vitamins: PN	1–2m	Pre+Postnatal	0.0504632	-0.0236429	0.124569	-0.258319	0.180373	0.260538	primiparity;m_bmiincl;m_muacincl	FALSE
VitaminA	Vitamins: VitaminA	3–4m	Postnatal	0.0479153	-0.0424863	0.138317	-0.2586	0.296683	0.405987	m_bmiincl;w_age;m_muacincl	FALSE
P	Minerals: P	3–4m	Prenatal	-1.70364	-12.0888	8.68151	-0.258721	0.745914	0.808074	primiparity;code_bep_n;m_bmiincl;m_hbincl;ga_days_incl;GWG;w_age;m_muacincl	FALSE
GamaTocopherol	Vitamins: GamaTocopherol	3–4m	Pre+Postnatal	0.0456512	-0.185681	0.276984	-0.25885	0.696931	0.787835	primiparity;code_bep_n;m_bmiincl;m_hbincl;ga_days_incl;GWG;w_age;m_heightincl	FALSE
PN	Vitamins: PN	3–4m	Postnatal	0.0367506	-0.0288631	0.102364	-0.259831	0.270203	0.390293	ga_days_incl;GWG;w_age;m_heightincl	FALSE
PN	Vitamins: PN	3–4m	Pre+Postnatal	0.0216721	-0.0239068	0.067251	-0.261493	0.348711	0.503693	primiparity;code_bep_n;m_hbincl;ga_days_incl;w_age;m_heightincl;m_muacincl	FALSE
PN	Vitamins: PN	1–2m	Prenatal	0.020105	-0.0351009	0.0753109	-0.261666	0.472472	0.75824	primiparity;m_bmiincl;w_age;m_muacincl	FALSE
PM	Vitamins: PM	1–2m	Postnatal	0.0190572	-0.0640098	0.102124	-0.261782	0.651019	0.769386	primiparity;code_bep_n;m_bmiincl;m_hbincl;ga_days_incl;GWG;w_age;m_heightincl;m_muacincl	FALSE
PM	Vitamins: PM	14–21d	Prenatal	0.0171026	-0.053739	0.0879442	-0.261997	0.633502	0.946486	primiparity;code_bep_n;m_bmiincl;GWG;w_age;m_heightincl;m_muacincl	FALSE
PM	Vitamins: PM	1–2m	Pre+Postnatal	0.0163502	-0.0809579	0.113658	-0.26208	0.740164	0.76977	primiparity;code_bep_n;m_bmiincl;m_hbincl;ga_days_incl;GWG;w_age;m_heightincl;m_muacincl	FALSE
PM	Vitamins: PM	1–2m	Prenatal	0.0157221	-0.0790739	0.110518	-0.262149	0.743278	0.87842	primiparity;code_bep_n;m_bmiincl;m_hbincl;ga_days_incl;w_age;m_heightincl;m_muacincl	FALSE
VitaminA	Vitamins: VitaminA	14–21d	Pre+Postnatal	0.0115808	-0.165852	0.189013	-0.262606	0.897458	0.897458	primiparity;code_bep_n;m_bmiincl;m_hbincl;GWG;w_age;m_muacincl	FALSE
GamaTocopherol	Vitamins: GamaTocopherol	3–4m	Prenatal	0.00933005	-0.234038	0.252699	-0.262854	0.939625	0.971145	primiparity;code_bep_n;m_bmiincl;m_hbincl;ga_days_incl;GWG;w_age;m_heightincl;m_muacincl	FALSE
PN	Vitamins: PN	1–2m	Postnatal	0.00842114	-0.0377381	0.0545804	-0.262954	0.719051	0.812841	primiparity;m_bmiincl;m_hbincl;ga_days_incl;w_age;m_muacincl	FALSE
PM	Vitamins: PM	3–4m	Postnatal	0.00814622	-0.0733027	0.0895952	-0.262985	0.843588	0.843588	primiparity;code_bep_n;m_bmiincl;m_hbincl;ga_days_incl;GWG;w_age;m_heightincl;m_muacincl	FALSE
PN	Vitamins: PN	3–4m	Prenatal	0.0064494	-0.0416181	0.0545169	-0.263172	0.790974	0.946605	primiparity;code_bep_n;m_bmiincl;m_hbincl;ga_days_incl;GWG;w_age;m_heightincl;m_muacincl	FALSE
GamaTocopherol	Vitamins: GamaTocopherol	14–21d	Postnatal	0.000790734	-0.179435	0.181017	-0.263796	0.993092	0.993092	code_bep_n;m_bmiincl;m_hbincl;ga_days_incl;GWG;w_age;m_heightincl;m_muacincl	FALSE
Bio	Vitamins: Bio	1–2m	Pre+Postnatal	4.81873e-05	-1.39997	1.40007	-0.263877	0.999946	0.999946	primiparity;code_bep_n;m_bmiincl;m_hbincl;ga_days_incl;GWG;w_age;m_heightincl;m_muacincl	FALSE
PN	Vitamins: PN	14–21d	Prenatal	-0.00553769	-0.0677203	0.0566449	-0.264493	0.860318	0.946486	primiparity;code_bep_n;m_bmiincl;m_hbincl;ga_days_incl;w_age;m_heightincl;m_muacincl	FALSE
VitaminA	Vitamins: VitaminA	14–21d	Postnatal	-0.0122008	-0.176307	0.151905	-0.265228	0.883364	0.993092	primiparity;code_bep_n;m_bmiincl;m_hbincl;ga_days_incl;GWG;w_age;m_heightincl;m_muacincl	FALSE
PN	Vitamins: PN	14–21d	Pre+Postnatal	-0.0211909	-0.0775753	0.0351936	-0.266219	0.458434	0.62733	primiparity;code_bep_n;m_bmiincl;ga_days_incl;GWG;w_age;m_heightincl;m_muacincl	FALSE
VitaminA	Vitamins: VitaminA	3–4m	Pre+Postnatal	-0.0305652	-0.108953	0.0478226	-0.267253	0.441987	0.580899	m_hbincl;ga_days_incl;GWG;w_age;m_muacincl	FALSE
VitaminA	Vitamins: VitaminA	3–4m	Prenatal	-0.0403834	-0.129872	0.049105	-0.268335	0.373556	0.946605	m_hbincl;m_muacincl	FALSE
PM	Vitamins: PM	3–4m	Prenatal	-0.0420329	-0.125627	0.0415613	-0.268517	0.321543	0.946605	primiparity;code_bep_n;m_bmiincl;ga_days_incl;GWG;m_heightincl;m_muacincl	FALSE
DSLNH_nmol.mL	HMOs: DSLNH_nmol.mL	1–2m	Postnatal	-6.65523	-35.9236	22.6132	-0.268583	0.653932	0.98932	primiparity;m_bmiincl;m_hbincl;GWG;m_muacincl	FALSE
VitaminA	Vitamins: VitaminA	1–2m	Prenatal	-0.0459022	-0.190335	0.0985305	-0.268944	0.530506	0.75824	primiparity;code_bep_n;m_bmiincl;m_hbincl;ga_days_incl;w_age;m_heightincl;m_muacincl	FALSE
VitaminA	Vitamins: VitaminA	1–2m	Postnatal	-0.0475391	-0.167473	0.0723945	-0.269124	0.434821	0.575591	primiparity;code_bep_n;m_bmiincl;ga_days_incl;GWG;w_age;m_heightincl	FALSE
GamaTocopherol	Vitamins: GamaTocopherol	3–4m	Postnatal	-0.0595148	-0.275947	0.156917	-0.270444	0.587674	0.664327	code_bep_n;m_bmiincl;m_hbincl;ga_days_incl;GWG;w_age;m_heightincl;m_muacincl	FALSE
VitaminA	Vitamins: VitaminA	1–2m	Pre+Postnatal	-0.0822505	-0.198664	0.034163	-0.272951	0.164634	0.251793	primiparity;m_bmiincl;m_hbincl;m_heightincl;m_muacincl	FALSE
VitaminA	Vitamins: VitaminA	14–21d	Prenatal	-0.0902968	-0.251904	0.07131	-0.273838	0.270843	0.591344	primiparity;m_bmiincl;GWG;w_age;m_heightincl	FALSE
Bio	Vitamins: Bio	1–2m	Postnatal	-0.0909646	-1.30729	1.12536	-0.273912	0.882737	0.882737	primiparity;code_bep_n;m_bmiincl;m_hbincl;ga_days_incl;GWG;w_age;m_heightincl;m_muacincl	FALSE
Mn	Minerals: Mn	14–21d	Pre+Postnatal	-1.74544	-3.53502	0.0441418	-0.274617	0.0558359	0.457823	primiparity;m_bmiincl;w_age;m_muacincl	FALSE
AlphaTocopherol	Vitamins: AlphaTocopherol	3–4m	Pre+Postnatal	-0.0990278	-1.08459	0.886538	-0.274801	0.842768	0.850368	primiparity;code_bep_n;m_bmiincl;m_hbincl;ga_days_incl;GWG;w_age;m_heightincl;m_muacincl	FALSE
GamaTocopherol	Vitamins: GamaTocopherol	1–2m	Prenatal	-0.104644	-0.296561	0.0872735	-0.27542	0.28263	0.75824	primiparity;m_bmiincl;m_hbincl;GWG;m_heightincl;m_muacincl	FALSE
GamaTocopherol	Vitamins: GamaTocopherol	1–2m	Pre+Postnatal	-0.158559	-0.348035	0.0309165	-0.281364	0.100274	0.195552	m_bmiincl;ga_days_incl	FALSE
PLP	Vitamins: PLP	3–4m	Prenatal	-0.177098	-0.925092	0.570896	-0.283408	0.640101	0.946605	primiparity;code_bep_n;m_bmiincl;m_hbincl;ga_days_incl;GWG;w_age;m_heightincl;m_muacincl	FALSE	FALSE	TRUE	0.969136
FDSLNH_nmol.mL	HMOs: FDSLNH_nmol.mL	1–2m	Prenatal	-6.97419	-51.6488	37.7004	-0.285554	0.757864	0.964827	primiparity;code_bep_n;m_bmiincl;m_hbincl;GWG;w_age;m_heightincl;m_muacincl	FALSE
B6	Vitamins: B6	1–2m	Prenatal	-0.208189	-12.0463	11.6299	-0.286836	0.972292	0.972292	code_bep_n;m_bmiincl;m_hbincl;ga_days_incl;GWG;m_heightincl;m_muacincl	FALSE
PLP	Vitamins: PLP	3–4m	Pre+Postnatal	-0.241466	-1.05507	0.57214	-0.290505	0.558237	0.691151	m_bmiincl;m_hbincl;ga_days_incl;GWG;w_age	FALSE	FALSE	TRUE	0.969136
PA	Vitamins: PA	1–2m	Postnatal	1818.63	1496.38	2140.88	4	9.63675e-22	2.50556e-20		TRUE	TRUE	TRUE	0.597222
Bio	Vitamins: Bio	3–4m	Prenatal	-0.305944	-1.66207	1.05018	-0.297614	0.655956	0.946605	primiparity;code_bep_n;m_bmiincl;m_hbincl;ga_days_incl;GWG;w_age;m_muacincl	FALSE
PL	Vitamins: PL	1–2m	Prenatal	-0.355572	-12.0164	11.3053	-0.303085	0.951974	0.972292	code_bep_n;m_bmiincl;m_hbincl;ga_days_incl;GWG;w_age;m_heightincl;m_muacincl	FALSE
PROTEIN	Macronutrients: PROTEIN	3–4m	Prenatal	-0.0598726	-0.138688	0.0189427	-0.30689	0.135234	0.490763	primiparity;m_hbincl;GWG;m_heightincl	FALSE
Bio	Vitamins: Bio	14–21d	Postnatal	-0.41722	-1.91586	1.08142	-0.309882	0.582949	0.68894	primiparity;code_bep_n;m_bmiincl;m_hbincl;ga_days_incl;GWG;w_age;m_heightincl;m_muacincl	FALSE
TMP	Vitamins: TMP	1–2m	Prenatal	-0.541507	-23.4602	22.3772	-0.323585	0.962776	0.972292	primiparity;code_bep_n;m_bmiincl;m_hbincl;ga_days_incl;GWG;w_age;m_heightincl;m_muacincl	FALSE
Bio	Vitamins: Bio	1–2m	Prenatal	-0.562109	-1.84038	0.716167	-0.325856	0.385805	0.75824	primiparity;code_bep_n;m_bmiincl;m_hbincl;ga_days_incl;GWG;w_age;m_muacincl	FALSE
AlphaTocopherol	Vitamins: AlphaTocopherol	1–2m	Prenatal	-0.565005	-1.8281	0.698086	-0.326175	0.377718	0.75824	primiparity;code_bep_n;m_bmiincl;m_hbincl;ga_days_incl;GWG;w_age	FALSE
AlphaTocopherol	Vitamins: AlphaTocopherol	3–4m	Prenatal	-0.619207	-1.64567	0.407258	-0.332151	0.234763	0.946605	primiparity;code_bep_n;m_bmiincl;m_hbincl;w_age;m_muacincl	FALSE
TPP	Vitamins: TPP	14–21d	Prenatal	-0.626288	-4.38606	3.13349	-0.332932	0.742086	0.946486	primiparity;code_bep_n;m_bmiincl;m_hbincl;ga_days_incl;GWG;w_age;m_heightincl;m_muacincl	FALSE	TRUE	FALSE	0.905594
AlphaTocopherol	Vitamins: AlphaTocopherol	1–2m	Pre+Postnatal	-0.695221	-2.04331	0.652864	-0.340532	0.309593	0.36652	primiparity;code_bep_n;m_bmiincl;m_hbincl;GWG;w_age;m_heightincl;m_muacincl	FALSE
LH	Bioactive proteins: LH	1–2m	Prenatal	-3.85073	-12.6216	4.92016	-0.340833	0.386588	0.811758	primiparity;code_bep_n;m_bmiincl;m_hbincl;ga_days_incl;GWG;m_muacincl	FALSE
Bio	Vitamins: Bio	3–4m	Postnatal	-0.794327	-2.07261	0.48396	-0.351458	0.221459	0.338703	code_bep_n;m_bmiincl;ga_days_incl;m_muacincl	FALSE
LH	Bioactive proteins: LH	3–4m	Prenatal	-3.99975	-10.398	2.39853	-0.353607	0.218311	0.307896	m_bmiincl;w_age;m_heightincl;m_muacincl	FALSE
AlphaTocopherol	Vitamins: AlphaTocopherol	1–2m	Postnatal	-0.849858	-2.00419	0.304477	-0.357581	0.147873	0.213595	primiparity;code_bep_n;ga_days_incl;GWG;w_age;m_heightincl;m_muacincl	FALSE
TPP	Vitamins: TPP	3–4m	Prenatal	-0.90109	-2.58765	0.785466	-0.363229	0.292279	0.946605	primiparity;code_bep_n;m_bmiincl;m_hbincl;ga_days_incl;GWG;w_age;m_heightincl;m_muacincl	FALSE
LSTb_nmol.mL	HMOs: LSTb_nmol.mL	14–21d	Pre+Postnatal	-8.46147	-38.7943	21.8714	-0.364688	0.58194	0.909281	primiparity;code_bep_n;m_bmiincl;m_hbincl;ga_days_incl;GWG;w_age;m_heightincl;m_muacincl	FALSE
DFLNH_nmol.mL	HMOs: DFLNH_nmol.mL	14–21d	Postnatal	-8.62183	-54.0543	36.8106	-0.37322	0.708138	0.804703	primiparity;code_bep_n;m_bmiincl;m_hbincl;ga_days_incl;w_age;m_heightincl;m_muacincl	FALSE
DSLNH_nmol.mL	HMOs: DSLNH_nmol.mL	1–2m	Prenatal	-8.65465	-42.1825	24.8732	-0.374967	0.610317	0.964827	primiparity;m_bmiincl;m_hbincl;ga_days_incl;GWG;w_age;m_heightincl;m_muacincl	FALSE
TPP	Vitamins: TPP	3–4m	Postnatal	-1.11587	-2.41163	0.179896	-0.386909	0.0908984	0.168811	primiparity;code_bep_n;m_bmiincl;ga_days_incl;GWG;w_age;m_muacincl	FALSE
TRP	Vitamins: TRP	14–21d	Postnatal	-1.20259	-74.9432	72.538	-0.39647	0.974327	0.993092	primiparity;code_bep_n;m_bmiincl;m_hbincl;ga_days_incl;GWG;w_age;m_heightincl;m_muacincl	FALSE
DSLNH_nmol.mL	HMOs: DSLNH_nmol.mL	3–4m	Postnatal	-9.27615	-29.2595	10.7071	-0.408035	0.360491	0.996267	primiparity;m_bmiincl;GWG;w_age;m_muacincl	FALSE
Mg	Minerals: Mg	14–21d	Postnatal	-2.09798	-4.90412	0.70817	-0.408698	0.141614	0.368197	primiparity;code_bep_n;m_bmiincl;m_hbincl;ga_days_incl;GWG;w_age;m_heightincl;m_muacincl	FALSE
LSTc_nmol.mL	HMOs: LSTc_nmol.mL	1–2m	Prenatal	-9.29068	-47.2311	28.6498	-0.408808	0.628761	0.964827	primiparity;code_bep_n;m_bmiincl;m_hbincl;ga_days_incl;GWG;w_age;m_heightincl;m_muacincl	FALSE
DSLNH_nmol.mL	HMOs: DSLNH_nmol.mL	3–4m	Pre+Postnatal	-9.36719	-28.6797	9.94531	-0.412879	0.33913	0.436563	primiparity;ga_days_incl;GWG;w_age;m_heightincl	FALSE
T	Vitamins: T	3–4m	Prenatal	-1.39646	-10.8342	8.0413	-0.417844	0.770073	0.946605	primiparity;code_bep_n;m_bmiincl;m_hbincl;ga_days_incl;GWG;w_age;m_heightincl;m_muacincl	FALSE	FALSE	TRUE	0.945
DSLNT_nmol.mL	HMOs: DSLNT_nmol.mL	3–4m	Postnatal	-9.47386	-32.8682	13.9205	-0.418555	0.424827	0.996267	primiparity;code_bep_n;m_bmiincl;ga_days_incl;GWG;w_age;m_heightincl;m_muacincl	FALSE	TRUE	FALSE	0.675926
Cr	Minerals: Cr	3–4m	Pre+Postnatal	-2.14405	-6.24454	1.95644	-0.426221	0.302962	0.656418	primiparity;code_bep_n;m_hbincl;w_age;m_heightincl	FALSE
Mg	Minerals: Mg	3–4m	Prenatal	-2.17665	-4.4619	0.108594	-0.43862	0.0617411	0.436395	m_hbincl;GWG;m_heightincl	FALSE
FSH	Bioactive proteins: FSH	3–4m	Pre+Postnatal	-5.03308	-15.1276	5.06148	-0.442182	0.325826	0.380131	primiparity;m_bmiincl;m_hbincl;GWG;w_age;m_muacincl	FALSE
B12	Vitamins: B12	14–21d	Postnatal	-1.67792	-83.3093	79.9534	-0.448876	0.967632	0.993092	primiparity;code_bep_n;m_bmiincl;m_hbincl;ga_days_incl;GWG;w_age;m_muacincl	FALSE
PA	Vitamins: PA	1–2m	Postnatal	1818.63	1496.38	2140.88	4	9.63675e-22	2.50556e-20		TRUE	TRUE	TRUE	0.890476
TPP	Vitamins: TPP	14–21d	Pre+Postnatal	-1.85892	-4.32493	0.607082	-0.468832	0.138304	0.224744	primiparity;m_hbincl;GWG;w_age;m_muacincl	FALSE	TRUE	FALSE	0.905594
TPP	Vitamins: TPP	1–2m	Pre+Postnatal	-1.94705	-4.18575	0.291659	-0.478548	0.087721	0.195552	primiparity;m_hbincl;ga_days_incl;GWG;w_age;m_muacincl	FALSE
TPP	Vitamins: TPP	1–2m	Prenatal	-1.98477	-3.99275	0.0232196	-0.482706	0.0526685	0.567753	primiparity;GWG;w_age	FALSE
DSLNH_nmol.mL	HMOs: DSLNH_nmol.mL	1–2m	Pre+Postnatal	-10.7936	-42.2307	20.6435	-0.488775	0.498287	0.893323	primiparity;m_bmiincl;m_hbincl;ga_days_incl;GWG;w_age;m_muacincl	FALSE
Mg	Minerals: Mg	14–21d	Pre+Postnatal	-2.31029	-5.41929	0.798699	-0.48945	0.143877	0.623468	primiparity;code_bep_n;m_bmiincl;m_hbincl;ga_days_incl;GWG;w_age;m_heightincl;m_muacincl	FALSE
TPP	Vitamins: TPP	14–21d	Postnatal	-2.05012	-4.23816	0.137921	-0.489912	0.0660773	0.132155	primiparity;m_hbincl;w_age;m_muacincl	FALSE	TRUE	FALSE	0.905594
CARBOHYDRATE	Macronutrients: CARBOHYDRATE	14–21d	Prenatal	-0.0744069	-0.221613	0.0727994	-0.517568	0.3189	0.974456	primiparity;code_bep_n;ga_days_incl;w_age;m_heightincl;m_muacincl	FALSE
Sia_nmol.mL	HMOs: Sia_nmol.mL	1–2m	Postnatal	-11.8128	-283.817	260.191	-0.543002	0.931737	0.98932	primiparity;code_bep_n;m_bmiincl;m_hbincl;ga_days_incl;GWG;w_age;m_heightincl;m_muacincl	FALSE
Ribo	Vitamins: Ribo	3–4m	Pre+Postnatal	39.2857	21.1224	57.4491	4	3.48806e-05	0.000181379		TRUE	FALSE	TRUE	0.969136
FDSLNH_nmol.mL	HMOs: FDSLNH_nmol.mL	3–4m	Postnatal	-12.0524	-39.3248	15.2199	-0.555753	0.383929	0.996267	primiparity;code_bep_n;m_hbincl;GWG;w_age;m_muacincl	FALSE	TRUE	TRUE	0.598958
LSTb_nmol.mL	HMOs: LSTb_nmol.mL	14–21d	Postnatal	-12.1205	-38.3397	14.0987	-0.559374	0.362373	0.804703	primiparity;code_bep_n;m_bmiincl;m_hbincl;ga_days_incl;GWG;w_age;m_heightincl;m_muacincl	FALSE
Fe	Minerals: Fe	3–4m	Postnatal	-2.53997	-70.0969	65.0169	-0.576801	0.940872	0.984372	primiparity;code_bep_n;m_bmiincl;m_hbincl;GWG;w_age;m_heightincl;m_muacincl	FALSE
FSH	Bioactive proteins: FSH	1–2m	Postnatal	-6.70102	-20.3371	6.93503	-0.585154	0.333188	0.932777	primiparity;m_bmiincl;w_age;m_heightincl;m_muacincl	FALSE
T	Vitamins: T	1–2m	Prenatal	-2.95045	-10.0653	4.16442	-0.589174	0.413369	0.75824	primiparity;m_bmiincl;m_hbincl;ga_days_incl;GWG;w_age;m_muacincl	FALSE	FALSE	TRUE	0.853801
T	Vitamins: T	1–2m	Prenatal	-2.95045	-10.0653	4.16442	-0.589174	0.413369	0.75824	primiparity;m_bmiincl;m_hbincl;ga_days_incl;GWG;w_age;m_muacincl	FALSE	FALSE	TRUE	0.890476
FAD	Vitamins: FAD	1–2m	Postnatal	-3.02032	-32.2242	26.1836	-0.596878	0.838382	0.871917	primiparity;code_bep_n;m_bmiincl;m_hbincl;ga_days_incl;w_age;m_heightincl;m_muacincl	FALSE
Mn	Minerals: Mn	1–2m	Pre+Postnatal	-2.59985	-6.02176	0.822054	-0.599578	0.135264	0.244389	m_hbincl;ga_days_incl;w_age;m_muacincl	FALSE	FALSE	TRUE	0.533058
Sia_nmol.mL	HMOs: Sia_nmol.mL	14–21d	Pre+Postnatal	-12.9053	-472.921	447.111	-0.601134	0.955819	0.955819	primiparity;code_bep_n;m_bmiincl;m_hbincl;ga_days_incl;GWG;w_age;m_heightincl;m_muacincl	FALSE
B2	Vitamins: B2	3–4m	Prenatal	-3.0921	-21.6855	15.5013	-0.604791	0.742547	0.946605	primiparity;code_bep_n;m_bmiincl;m_hbincl;ga_days_incl;GWG;w_age;m_heightincl;m_muacincl	FALSE	FALSE	TRUE	0.945
FDSLNH_nmol.mL	HMOs: FDSLNH_nmol.mL	3–4m	Prenatal	-13.0239	-42.8042	16.7563	-0.607445	0.388377	0.80912	primiparity;code_bep_n;m_bmiincl;m_hbincl;GWG	FALSE	TRUE	TRUE	0.598958
Mn	Minerals: Mn	1–2m	Prenatal	-2.6451	-6.37228	1.08208	-0.616788	0.162624	0.694224	m_hbincl;GWG;m_heightincl;m_muacincl	FALSE	FALSE	TRUE	0.533058
X3.SL_nmol.mL	HMOs: X3.SL_nmol.mL	14–21d	Prenatal	-13.52	-80.8995	53.8595	-0.633839	0.691827	0.831497	primiparity;code_bep_n;m_bmiincl;m_hbincl;ga_days_incl;GWG;w_age;m_heightincl;m_muacincl	FALSE
Ribo	Vitamins: Ribo	3–4m	Pre+Postnatal	39.2857	21.1224	57.4491	4	3.48806e-05	0.000181379		TRUE	TRUE	TRUE	0.945
LNnT_nmol.mL	HMOs: LNnT_nmol.mL	14–21d	Pre+Postnatal	-14.2157	-95.925	67.4935	-0.670858	0.731224	0.955819	primiparity;code_bep_n;m_bmiincl;m_hbincl;ga_days_incl;GWG;w_age;m_heightincl;m_muacincl	FALSE
DFLNH_nmol.mL	HMOs: DFLNH_nmol.mL	14–21d	Pre+Postnatal	-14.2427	-61.3439	32.8586	-0.672292	0.550767	0.909281	primiparity;m_hbincl;ga_days_incl;w_age	FALSE
NAM	Vitamins: NAM	14–21d	Prenatal	-3.8486	-117.155	109.458	-0.688196	0.946486	0.946486	primiparity;m_bmiincl;m_hbincl;GWG;w_age;m_heightincl;m_muacincl	FALSE
LNnT_nmol.mL	HMOs: LNnT_nmol.mL	3–4m	Prenatal	-14.7388	-102.368	72.8904	-0.698687	0.739737	0.860844	primiparity;code_bep_n;m_hbincl;ga_days_incl;GWG;w_age;m_heightincl	FALSE
Sia_nmol.mL	HMOs: Sia_nmol.mL	1–2m	Pre+Postnatal	-14.8734	-298.071	268.324	-0.705848	0.917429	0.960378	primiparity;code_bep_n;m_hbincl;ga_days_incl;GWG;w_age;m_heightincl;m_muacincl	FALSE
PROTEIN	Macronutrients: PROTEIN	1–2m	Prenatal	-0.088437	-0.18161	0.00473615	-0.720936	0.0626438	0.083525	GWG	FALSE
FGF.21	Bioactive proteins: FGF.21	14–21d	Pre+Postnatal	-8.47119	-32.7496	15.8072	-0.736889	0.491196	0.690888	primiparity;code_bep_n;m_bmiincl;m_hbincl;ga_days_incl;GWG;w_age;m_heightincl;m_muacincl	FALSE
DSLNH_nmol.mL	HMOs: DSLNH_nmol.mL	3–4m	Prenatal	-15.5798	-38.128	6.96844	-0.743434	0.173885	0.621019	primiparity;m_hbincl;ga_days_incl;GWG;w_age;m_heightincl	FALSE
LSTc_nmol.mL	HMOs: LSTc_nmol.mL	3–4m	Pre+Postnatal	-15.8768	-37.9577	6.20401	-0.75924	0.157304	0.357509	primiparity;code_bep_n;m_bmiincl;ga_days_incl;GWG;w_age;m_muacincl	FALSE	FALSE	TRUE	0.646154
DFLNH_nmol.mL	HMOs: DFLNH_nmol.mL	1–2m	Prenatal	-16.2603	-38.6731	6.15237	-0.779645	0.153544	0.964827	primiparity;m_bmiincl;m_hbincl;GWG;w_age;m_heightincl;m_muacincl	FALSE	TRUE	FALSE	0.652047
DSLNH_nmol.mL	HMOs: DSLNH_nmol.mL	14–21d	Pre+Postnatal	-16.6565	-85.2493	51.9363	-0.800725	0.631741	0.929031	primiparity;m_bmiincl;m_hbincl;ga_days_incl;GWG;m_muacincl	FALSE
B2	Vitamins: B2	3–4m	Pre+Postnatal	45.6669	20.6452	70.6887	4	0.000428085	0.00159003	GWG	TRUE	FALSE	TRUE	0.945
FGF.21	Bioactive proteins: FGF.21	3–4m	Prenatal	-9.36868	-25.8929	7.15555	-0.81382	0.263911	0.307896	primiparity;m_bmiincl;m_hbincl;GWG;w_age;m_muacincl	FALSE
FSH	Bioactive proteins: FSH	3–4m	Prenatal	-9.647	-19.7956	0.501587	-0.837677	0.0622546	0.307896	primiparity;m_bmiincl;GWG;m_muacincl	FALSE
NMN	Vitamins: NMN	3–4m	Pre+Postnatal	136.261	52.4595	220.062	4	0.00162141	0.0052696	w_age	TRUE	FALSE	TRUE	0.945
LSTc_nmol.mL	HMOs: LSTc_nmol.mL	1–2m	Pre+Postnatal	-17.6783	-52.4012	17.0447	-0.85509	0.315826	0.877295	primiparity;code_bep_n;ga_days_incl;GWG;w_age;m_heightincl	FALSE
X3.SL_nmol.mL	HMOs: X3.SL_nmol.mL	3–4m	Pre+Postnatal	-18.2011	-48.2914	11.8892	-0.882907	0.233656	0.417243	primiparity;code_bep_n;m_bmiincl;ga_days_incl;GWG;w_age;m_muacincl	FALSE
B1	Vitamins: B1	1–2m	Prenatal	-5.66941	-22.7087	11.3699	-0.888944	0.51147	0.75824	code_bep_n;m_bmiincl;m_hbincl;GWG;m_heightincl;m_muacincl	FALSE
LNFP.II_nmol.mL	HMOs: LNFP.II_nmol.mL	3–4m	Postnatal	-18.4785	-178.703	141.746	-0.897667	0.82002	0.996267	primiparity;code_bep_n;m_bmiincl;m_hbincl;ga_days_incl;GWG;w_age;m_heightincl;m_muacincl	FALSE	TRUE	FALSE	0.646154
FSH	Bioactive proteins: FSH	1–2m	Prenatal	-10.4724	-27.0308	6.08607	-0.908427	0.213035	0.745622	primiparity;m_bmiincl;m_hbincl;GWG;w_age;m_heightincl	FALSE
X3.SL_nmol.mL	HMOs: X3.SL_nmol.mL	1–2m	Pre+Postnatal	-19.4276	-57.5197	18.6645	-0.948165	0.314983	0.877295	primiparity;ga_days_incl;GWG;w_age;m_muacincl	FALSE	TRUE	FALSE	0.591787
LNnT_nmol.mL	HMOs: LNnT_nmol.mL	3–4m	Pre+Postnatal	-19.6677	-92.5823	53.2468	-0.960942	0.594559	0.619332	primiparity;code_bep_n;m_bmiincl;ga_days_incl;w_age;m_heightincl;m_muacincl	FALSE
FGF.21	Bioactive proteins: FGF.21	3–4m	Postnatal	-11.5407	-25.1905	2.10914	-1	0.0968874	0.339106	GWG;w_age;m_heightincl;m_muacincl	FALSE
P	Minerals: P	14–21d	Pre+Postnatal	-3.65268	-18.4012	11.0958	-1	0.624861	0.883261	primiparity;code_bep_n;m_bmiincl;m_hbincl;ga_days_incl;GWG;w_age;m_heightincl;m_muacincl	FALSE
DSLNH_nmol.mL	HMOs: DSLNH_nmol.mL	14–21d	Postnatal	-20.4018	-79.195	38.3915	-1	0.493955	0.804703	m_bmiincl;w_age;m_muacincl	FALSE
Ca	Minerals: Ca	14–21d	Pre+Postnatal	-3.70175	-26.3979	18.9944	-1.01866	0.747375	0.883261	primiparity;code_bep_n;m_bmiincl;m_hbincl;ga_days_incl;GWG;w_age;m_heightincl;m_muacincl	FALSE
B2	Vitamins: B2	1–2m	Prenatal	-6.99161	-23.3118	9.32862	-1.03472	0.398184	0.75824	m_bmiincl;m_hbincl;GWG;m_heightincl;m_muacincl	FALSE
LH	Bioactive proteins: LH	14–21d	Pre+Postnatal	-12.0513	-49.7892	25.6866	-1.04377	0.528661	0.690888	m_bmiincl;m_hbincl;ga_days_incl;w_age;m_muacincl	FALSE
Cr	Minerals: Cr	3–4m	Prenatal	-3.77683	-8.33523	0.781573	-1.04722	0.10355	0.436395	primiparity;code_bep_n;m_bmiincl;m_hbincl;GWG;m_heightincl	FALSE
X6.SL_nmol.mL	HMOs: X6.SL_nmol.mL	14–21d	Pre+Postnatal	-21.9382	-258.967	215.091	-1.08175	0.854981	0.955819	primiparity;code_bep_n;m_bmiincl;m_hbincl;ga_days_incl;GWG;w_age;m_heightincl;m_muacincl	FALSE
LSTc_nmol.mL	HMOs: LSTc_nmol.mL	3–4m	Prenatal	-22.8747	-46.7188	0.969389	-1.13158	0.0599116	0.621019	primiparity;m_hbincl;ga_days_incl;w_age;m_heightincl	FALSE	FALSE	TRUE	0.646154
B12	Vitamins: B12	3–4m	Prenatal	-8.22752	-47.4938	31.0387	-1.17098	0.678947	0.946605	m_bmiincl;m_hbincl;ga_days_incl;GWG;w_age;m_heightincl;m_muacincl	FALSE
P	Minerals: P	14–21d	Prenatal	-4.12915	-19.7398	11.4815	-1.18122	0.601377	0.783731	primiparity;m_bmiincl;ga_days_incl;GWG;m_heightincl;m_muacincl	FALSE
NAM	Vitamins: NAM	1–2m	Prenatal	-8.75134	-52.3046	34.802	-1.22873	0.691532	0.869167	primiparity;code_bep_n;m_bmiincl;m_hbincl;ga_days_incl;GWG;w_age;m_heightincl;m_muacincl	FALSE
Na	Minerals: Na	1–2m	Pre+Postnatal	-4.35046	-46.6699	37.969	-1.26539	0.839148	0.899579	primiparity;code_bep_n;m_bmiincl;m_hbincl;ga_days_incl;GWG;w_age;m_heightincl;m_muacincl	FALSE
FAD	Vitamins: FAD	3–4m	Prenatal	-9.54397	-45.7571	26.6692	-1.31612	0.602787	0.946605	primiparity;code_bep_n;m_bmiincl;m_hbincl;ga_days_incl;GWG;w_age;m_heightincl;m_muacincl	FALSE	TRUE	FALSE	0.617647
LH	Bioactive proteins: LH	14–21d	Prenatal	-15.4334	-56.5144	25.6476	-1.33368	0.458462	0.961797	m_bmiincl;GWG;w_age;m_heightincl;m_muacincl	FALSE
TRP	Vitamins: TRP	14–21d	Pre+Postnatal	-10.2929	-94.9623	74.3765	-1.39869	0.810287	0.877811	code_bep_n;m_bmiincl;m_hbincl;ga_days_incl;GWG;w_age;m_heightincl;m_muacincl	FALSE
LNFP.I_nmol.mL	HMOs: LNFP.I_nmol.mL	1–2m	Postnatal	-30.2936	-269.566	208.979	-1.52632	0.80282	0.98932	primiparity;code_bep_n;m_bmiincl;m_hbincl;ga_days_incl;GWG;w_age;m_heightincl;m_muacincl	FALSE	FALSE	TRUE	0.652047
FAT	Macronutrients: FAT	3–4m	Pre+Postnatal	-0.148797	-0.657091	0.359497	-1.59586	0.563512	0.588385	primiparity;code_bep_n;m_bmiincl;m_hbincl;ga_days_incl;GWG;w_age;m_heightincl;m_muacincl	FALSE
NR	Vitamins: NR	3–4m	Pre+Postnatal	162.192	4.00349	320.381	4	0.0445525	0.105306	ga_days_incl;w_age;m_muacincl	TRUE	FALSE	TRUE	0.969136
Sia_nmol.mL	HMOs: Sia_nmol.mL	3–4m	Prenatal	-32.07	-262.279	198.139	-1.62083	0.783175	0.860844	primiparity;code_bep_n;m_bmiincl;m_hbincl;ga_days_incl;w_age;m_heightincl;m_muacincl	FALSE
X3.SL_nmol.mL	HMOs: X3.SL_nmol.mL	1–2m	Postnatal	-32.6004	-66.5787	1.37799	-1.64905	0.0599192	0.98932	primiparity;w_age;m_muacincl	FALSE	TRUE	FALSE	0.591787
LH	Bioactive proteins: LH	14–21d	Postnatal	-19.1483	-52.8494	14.5528	-1.65211	0.263315	0.614401	m_bmiincl;ga_days_incl;w_age;m_heightincl;m_muacincl	FALSE
K	Minerals: K	14–21d	Postnatal	-5.46001	-54.5383	43.6183	-1.68739	0.826231	0.951045	primiparity;code_bep_n;m_bmiincl;m_hbincl;GWG;w_age;m_heightincl;m_muacincl	FALSE
P	Minerals: P	3–4m	Postnatal	-5.47146	-14.3036	3.36064	-1.69174	0.222846	0.984372	m_bmiincl;m_hbincl;w_age;m_muacincl	FALSE
Nufa	Vitamins: Nufa	3–4m	Pre+Postnatal	178.235	123.351	233.119	4	1.9399e-09	2.52186e-08		TRUE	TRUE	TRUE	0.969136
DFLNH_nmol.mL	HMOs: DFLNH_nmol.mL	14–21d	Prenatal	-34.4794	-89.1304	20.1715	-1.74903	0.214025	0.767011	primiparity;m_hbincl;ga_days_incl;GWG;w_age;m_heightincl;m_muacincl	FALSE
DFLNT_nmol.mL	HMOs: DFLNT_nmol.mL	3–4m	Postnatal	-34.9524	-179.158	109.254	-1.7742	0.632654	0.996267	primiparity;code_bep_n;m_bmiincl;m_hbincl;ga_days_incl;GWG;w_age;m_muacincl	FALSE
P	Minerals: P	3–4m	Pre+Postnatal	-5.70101	-13.8437	2.44168	-1.77905	0.16843	0.452093	primiparity;m_bmiincl;m_hbincl;GWG;w_age;m_muacincl	FALSE
X3.SL_nmol.mL	HMOs: X3.SL_nmol.mL	14–21d	Postnatal	-37.9586	-92.3847	16.4676	-1.93415	0.170199	0.804703	primiparity;code_bep_n;m_bmiincl;ga_days_incl;GWG;m_muacincl	FALSE
LNT_nmol.mL	HMOs: LNT_nmol.mL	14–21d	Postnatal	-39.4034	-593.493	514.686	-2.01103	0.888412	0.92543	primiparity;code_bep_n;m_bmiincl;ga_days_incl;GWG;w_age;m_heightincl;m_muacincl	FALSE
TRP	Vitamins: TRP	14–21d	Prenatal	-16.0311	-144.054	111.992	-2.03133	0.804576	0.946486	primiparity;code_bep_n;m_bmiincl;m_hbincl;ga_days_incl;GWG;w_age;m_heightincl;m_muacincl	FALSE
FAD	Vitamins: FAD	1–2m	Pre+Postnatal	-16.8332	-43.5967	9.93018	-2.11977	0.215736	0.289434	primiparity;m_hbincl;GWG;w_age	FALSE
FAD	Vitamins: FAD	1–2m	Prenatal	-17.1288	-45.4993	11.2418	-2.15235	0.234476	0.75824	GWG;m_muacincl	FALSE
P	Minerals: P	1–2m	Postnatal	-6.70321	-15.8458	2.43936	-2.16022	0.149507	0.323931	m_bmiincl;m_hbincl;w_age;m_heightincl;m_muacincl	FALSE	TRUE	TRUE	0.558824
P	Minerals: P	1–2m	Pre+Postnatal	-6.76033	-15.9428	2.42212	-2.18194	0.147688	0.244389	m_bmiincl;m_hbincl;w_age;m_muacincl	FALSE	TRUE	TRUE	0.558824
DFLac_nmol.mL	HMOs: DFLac_nmol.mL	14–21d	Postnatal	-42.8604	-300.034	214.313	-2.19496	0.742344	0.806895	m_bmiincl;m_hbincl;ga_days_incl;w_age;m_muacincl	FALSE
LSTc_nmol.mL	HMOs: LSTc_nmol.mL	14–21d	Prenatal	-44.4667	-124.947	36.0134	-2.28043	0.276124	0.767011	primiparity;code_bep_n;m_bmiincl;m_hbincl;ga_days_incl;GWG;w_age;m_heightincl;m_muacincl	FALSE
DSLNH_nmol.mL	HMOs: DSLNH_nmol.mL	14–21d	Prenatal	-45.1899	-112.926	22.5462	-2.31891	0.189063	0.767011	m_bmiincl;m_hbincl;ga_days_incl;m_heightincl;m_muacincl	FALSE
FAT	Macronutrients: FAT	3–4m	Prenatal	-0.20092	-0.744807	0.342968	-2.35139	0.466003	0.490763	primiparity;code_bep_n;m_bmiincl;ga_days_incl;GWG;w_age;m_muacincl	FALSE
P	Minerals: P	14–21d	Postnatal	-7.52631	-21.4332	6.38055	-2.47327	0.286507	0.532084	m_bmiincl;m_hbincl;ga_days_incl;w_age;m_muacincl	FALSE
TRP	Vitamins: TRP	3–4m	Prenatal	-24.154	-81.0727	32.7648	-2.9269	0.402567	0.946605	primiparity;code_bep_n;m_hbincl;w_age;m_heightincl;m_muacincl	FALSE
LNFP.II_nmol.mL	HMOs: LNFP.II_nmol.mL	14–21d	Postnatal	-62.2944	-366.299	241.71	-3.229	0.686046	0.804703	primiparity;code_bep_n;m_bmiincl;m_hbincl;ga_days_incl;GWG;w_age;m_heightincl;m_muacincl	FALSE
LSTc_nmol.mL	HMOs: LSTc_nmol.mL	14–21d	Pre+Postnatal	-67.4265	-140.987	6.13361	-3.50206	0.0720741	0.300309	primiparity;code_bep_n;ga_days_incl;GWG;w_age;m_heightincl;m_muacincl	FALSE
DFLNT_nmol.mL	HMOs: DFLNT_nmol.mL	1–2m	Postnatal	-70.2269	-248.46	108.006	-3.65106	0.437542	0.98932	primiparity;code_bep_n;m_bmiincl;m_hbincl;ga_days_incl;GWG;m_muacincl	FALSE
Sia_nmol.mL	HMOs: Sia_nmol.mL	3–4m	Postnatal	-72.2726	-257.65	113.104	-3.75991	0.442258	0.996267	primiparity;code_bep_n;m_bmiincl;ga_days_incl;GWG;w_age;m_heightincl;m_muacincl	FALSE
K	Minerals: K	3–4m	Pre+Postnatal	-11.1674	-38.3907	16.0559	-3.85809	0.418634	0.73125	primiparity;m_bmiincl;m_hbincl;GWG;m_heightincl	FALSE
Na	Minerals: Na	14–21d	Prenatal	-11.3743	-94.9275	72.179	-3.93677	0.787912	0.789167	primiparity;code_bep_n;m_bmiincl;m_hbincl;ga_days_incl;GWG;w_age;m_heightincl;m_muacincl	FALSE
NAD	Vitamins: NAD	3–4m	Pre+Postnatal	-33.8543	-388.102	320.393	-3.99637	0.850368	0.850368	primiparity;code_bep_n;m_bmiincl;ga_days_incl;GWG;w_age;m_heightincl;m_muacincl	FALSE
Kcal.L	Macronutrients: Kcal.L	14–21d	Postnatal	-1.53107	-37.8875	34.8253	-4	0.933771	0.933771	primiparity;code_bep_n;m_bmiincl;m_hbincl;GWG;w_age;m_heightincl;m_muacincl	FALSE
Nufa	Vitamins: Nufa	3–4m	Pre+Postnatal	178.235	123.351	233.119	4	1.9399e-09	2.52186e-08		TRUE	TRUE	TRUE	0.945
PA	Vitamins: PA	3–4m	Pre+Postnatal	1333.69	994.631	1672.74	4	1.42575e-12	3.70694e-11		TRUE	TRUE	TRUE	0.969136
PA	Vitamins: PA	3–4m	Pre+Postnatal	1333.69	994.631	1672.74	4	1.42575e-12	3.70694e-11		TRUE	TRUE	FALSE	0.617647
PA	Vitamins: PA	3–4m	Pre+Postnatal	1333.69	994.631	1672.74	4	1.42575e-12	3.70694e-11		TRUE	TRUE	TRUE	0.945
B2	Vitamins: B2	3–4m	Postnatal	49.9807	29.1112	70.8502	4	5.01365e-06	4.34517e-05	m_muacincl	TRUE	FALSE	TRUE	0.945
NAM	Vitamins: NAM	3–4m	Postnatal	80.9309	35.3877	126.474	4	0.000586323	0.00152444		TRUE
NMN	Vitamins: NMN	3–4m	Postnatal	166.334	87.0823	245.585	4	5.5539e-05	0.000240669		TRUE	FALSE	TRUE	0.945
NR	Vitamins: NR	3–4m	Postnatal	305.368	129.404	481.333	4	0.000778703	0.00184057		TRUE	FALSE	TRUE	0.969136
B3	Vitamins: B3	3–4m	Postnatal	327.686	152.945	502.426	4	0.000294249	0.000928732		TRUE
Kcal.L	Macronutrients: Kcal.L	3–4m	Pre+Postnatal	-14.5081	-59.7786	30.7624	-4	0.527243	0.588385	primiparity;code_bep_n;m_bmiincl;m_hbincl;GWG;m_heightincl;m_muacincl	FALSE
Kcal.L	Macronutrients: Kcal.L	3–4m	Prenatal	-21.6744	-71.7574	28.4086	-4	0.393285	0.490763	primiparity;m_bmiincl;ga_days_incl;GWG;w_age;m_muacincl	FALSE
Kcal.L	Macronutrients: Kcal.L	3–4m	Postnatal	-3.31533	-47.334	40.7033	-4	0.881876	0.881876	primiparity;code_bep_n;m_bmiincl;m_hbincl;GWG;w_age;m_heightincl;m_muacincl	FALSE
Calprotectin	Bioactive proteins: Calprotectin	14–21d	Pre+Postnatal	-565624	-3.37344e+06	2.24219e+06	-4	0.690888	0.690888	primiparity;code_bep_n;m_bmiincl;m_hbincl;ga_days_incl;GWG;w_age	FALSE
IgA	Bioactive proteins: IgA	14–21d	Pre+Postnatal	-1.41092e+08	-2.85238e+08	3.05314e+06	-4	0.0549814	0.38487	primiparity;w_age	FALSE	TRUE	FALSE	0.723776
Calprotectin	Bioactive proteins: Calprotectin	14–21d	Prenatal	-1.45993e+06	-4.35266e+06	1.43279e+06	-4	0.319657	0.961797	primiparity;m_hbincl;ga_days_incl;GWG;w_age;m_heightincl;m_muacincl	FALSE
IgA	Bioactive proteins: IgA	14–21d	Prenatal	-2.84247e+07	-2.79518e+08	2.22669e+08	-4	0.823033	0.961797	primiparity;code_bep_n;m_hbincl;ga_days_incl;w_age;m_heightincl;m_muacincl	FALSE	TRUE	FALSE	0.723776
IgA	Bioactive proteins: IgA	14–21d	Postnatal	-1.03963e+08	-2.3472e+08	2.67936e+07	-4	0.118256	0.614401	primiparity;m_bmiincl;m_hbincl;ga_days_incl;w_age;m_muacincl	FALSE	TRUE	FALSE	0.723776
IgA	Bioactive proteins: IgA	1–2m	Postnatal	-1.35877e+07	-1.20064e+08	9.28883e+07	-4	0.801293	0.932777	primiparity;code_bep_n;m_bmiincl;m_hbincl;ga_days_incl;GWG;w_age;m_muacincl	FALSE
IgA	Bioactive proteins: IgA	3–4m	Pre+Postnatal	-3.32776e+08	-7.67803e+08	1.02252e+08	-4	0.132657	0.297449	m_bmiincl;m_hbincl;GWG;w_age	FALSE	TRUE	TRUE	0.657407
Calprotectin	Bioactive proteins: Calprotectin	3–4m	Prenatal	-111941	-537917	314035	-4	0.603835	0.603835	primiparity;code_bep_n;m_bmiincl;ga_days_incl;GWG;w_age;m_heightincl;m_muacincl	FALSE
IgA	Bioactive proteins: IgA	3–4m	Prenatal	-2.99054e+08	-7.70212e+08	1.72104e+08	-4	0.211372	0.307896	m_bmiincl;m_hbincl;GWG;w_age	FALSE	TRUE	TRUE	0.657407
IgA	Bioactive proteins: IgA	3–4m	Postnatal	-1.70632e+08	-7.88025e+08	4.46761e+08	-4	0.585753	0.778186	primiparity;m_bmiincl;m_hbincl;ga_days_incl;GWG;w_age;m_heightincl;m_muacincl	FALSE	TRUE	TRUE	0.657407
Na	Minerals: Na	14–21d	Pre+Postnatal	-29.3686	-103.26	44.5231	-4	0.432998	0.845149	primiparity;code_bep_n;m_bmiincl;m_hbincl;ga_days_incl;GWG;w_age;m_muacincl	FALSE
K	Minerals: K	14–21d	Pre+Postnatal	-18.7244	-68.1781	30.7293	-4	0.45508	0.845149	m_bmiincl;m_hbincl;ga_days_incl;GWG;w_age;m_muacincl	FALSE
Fe	Minerals: Fe	14–21d	Pre+Postnatal	-242.013	-504.498	20.4721	-4	0.0704343	0.457823	primiparity;w_age;m_muacincl	FALSE
Cu	Minerals: Cu	14–21d	Pre+Postnatal	-128.297	-404.841	148.246	-4	0.36034	0.845149	primiparity;m_hbincl;ga_days_incl;w_age;m_muacincl	FALSE
Zn	Minerals: Zn	14–21d	Pre+Postnatal	-42.6713	-483.169	397.827	-4	0.848264	0.894267	primiparity;code_bep_n;m_bmiincl;m_hbincl;ga_days_incl;GWG;w_age;m_heightincl;m_muacincl	FALSE
K	Minerals: K	14–21d	Prenatal	-41.4715	-92.445	9.50209	-4	0.109832	0.783731	m_bmiincl;GWG;m_heightincl;m_muacincl	FALSE
Fe	Minerals: Fe	14–21d	Prenatal	-70.5459	-390.541	249.449	-4	0.663157	0.783731	primiparity;code_bep_n;m_bmiincl;m_hbincl;ga_days_incl;GWG;w_age;m_heightincl;m_muacincl	FALSE
Cu	Minerals: Cu	14–21d	Prenatal	-160.59	-462.652	141.473	-4	0.294585	0.783731	primiparity;m_hbincl;w_age;m_heightincl;m_muacincl	FALSE
Zn	Minerals: Zn	14–21d	Prenatal	-65.5496	-550.001	418.902	-4	0.789167	0.789167	primiparity;code_bep_n;m_bmiincl;m_hbincl;ga_days_incl;GWG;w_age;m_heightincl;m_muacincl	FALSE
Na	Minerals: Na	14–21d	Postnatal	-39.1288	-98.3382	20.0805	-4	0.193521	0.419295	primiparity;m_bmiincl;m_hbincl;ga_days_incl;w_age;m_muacincl	FALSE
Fe	Minerals: Fe	14–21d	Postnatal	-234.356	-478.925	10.2133	-4	0.0602262	0.368197	w_age;m_heightincl;m_muacincl	FALSE
Cu	Minerals: Cu	14–21d	Postnatal	-179.432	-411.049	52.1852	-4	0.127898	0.368197	primiparity;m_hbincl;w_age;m_muacincl	FALSE
Zn	Minerals: Zn	14–21d	Postnatal	-37.8313	-451.452	375.789	-4	0.856757	0.951045	primiparity;code_bep_n;m_bmiincl;m_hbincl;ga_days_incl;GWG;w_age;m_heightincl;m_muacincl	FALSE
Cr	Minerals: Cr	1–2m	Pre+Postnatal	-15.6235	-75.1342	43.8873	-4	0.604448	0.714348	m_bmiincl;w_age;m_heightincl	FALSE
Fe	Minerals: Fe	1–2m	Pre+Postnatal	-276.453	-654.462	101.556	-4	0.150393	0.244389	m_heightincl;m_muacincl	FALSE
Cu	Minerals: Cu	1–2m	Pre+Postnatal	-55.3238	-122.731	12.0832	-4	0.106878	0.244389	m_hbincl;m_heightincl;m_muacincl	FALSE
Zn	Minerals: Zn	1–2m	Pre+Postnatal	-201.336	-432.901	30.2292	-4	0.0877994	0.244389	m_bmiincl;m_hbincl;ga_days_incl;w_age;m_muacincl	FALSE
Cr	Minerals: Cr	1–2m	Prenatal	-24.8679	-89.1899	39.454	-4	0.445617	0.694224	m_bmiincl;GWG;m_heightincl	FALSE
Fe	Minerals: Fe	1–2m	Prenatal	-199.842	-609.8	210.116	-4	0.336504	0.694224	primiparity;m_bmiincl;m_heightincl;m_muacincl	FALSE
Cu	Minerals: Cu	1–2m	Prenatal	-27.0224	-102.629	48.5846	-4	0.480617	0.694224	primiparity;m_bmiincl;m_hbincl;m_heightincl;m_muacincl	FALSE
Cr	Minerals: Cr	1–2m	Postnatal	-24.6774	-77.2493	27.8945	-4	0.355192	0.612869	m_bmiincl;w_age;m_heightincl	FALSE
Fe	Minerals: Fe	1–2m	Postnatal	-319.46	-650.476	11.5571	-4	0.0584444	0.253259	m_bmiincl;m_heightincl;m_muacincl	FALSE
Cu	Minerals: Cu	1–2m	Postnatal	-57.3114	-121.857	7.23433	-4	0.0813991	0.264547	m_bmiincl;w_age;m_heightincl;m_muacincl	FALSE
Zn	Minerals: Zn	1–2m	Postnatal	-62.0174	-288.408	164.373	-4	0.589073	0.693679	primiparity;code_bep_n;m_bmiincl;m_hbincl;ga_days_incl;GWG;w_age;m_heightincl;m_muacincl	FALSE
Na	Minerals: Na	3–4m	Pre+Postnatal	-26.8758	-65.7555	12.004	-4	0.173882	0.452093	m_bmiincl;ga_days_incl;w_age;m_muacincl	FALSE
Fe	Minerals: Fe	3–4m	Pre+Postnatal	-46.0217	-105.741	13.6971	-4	0.129817	0.452093	primiparity;code_bep_n;m_bmiincl;m_hbincl;GWG;w_age;m_muacincl	FALSE
Zn	Minerals: Zn	3–4m	Pre+Postnatal	-32.8317	-248.701	183.038	-4	0.764002	0.936286	primiparity;code_bep_n;m_bmiincl;m_hbincl;ga_days_incl;GWG;w_age;m_heightincl;m_muacincl	FALSE
Na	Minerals: Na	3–4m	Prenatal	-14.3547	-64.1357	35.4263	-4	0.569116	0.808074	primiparity;code_bep_n;m_bmiincl;m_hbincl;ga_days_incl;GWG;w_age;m_heightincl;m_muacincl	FALSE
K	Minerals: K	3–4m	Prenatal	-12.8519	-41.8063	16.1025	-4	0.381279	0.669021	primiparity;m_bmiincl;m_hbincl;ga_days_incl;w_age;m_heightincl;m_muacincl	FALSE
Fe	Minerals: Fe	3–4m	Prenatal	-46.7228	-113.393	19.947	-4	0.167844	0.436395	primiparity;code_bep_n;m_bmiincl;m_hbincl;ga_days_incl;GWG;w_age;m_heightincl;m_muacincl	FALSE
NAD	Vitamins: NAD	14–21d	Pre+Postnatal	-126.253	-1002.96	750.455	-4	0.776122	0.877355	primiparity;code_bep_n;m_bmiincl;m_hbincl;ga_days_incl;GWG;w_age;m_heightincl;m_muacincl	FALSE
NAD	Vitamins: NAD	14–21d	Prenatal	-660.249	-1597.13	276.632	-4	0.165497	0.570731	primiparity;m_hbincl;ga_days_incl;w_age;m_muacincl	FALSE
B3	Vitamins: B3	14–21d	Prenatal	-51.8529	-344.958	241.252	-4	0.7267	0.946486	primiparity;code_bep_n;m_bmiincl;m_hbincl;ga_days_incl;GWG;w_age;m_heightincl;m_muacincl	FALSE	FALSE	TRUE	0.855263
B12	Vitamins: B12	14–21d	Prenatal	-65.1224	-160.62	30.3747	-4	0.179403	0.570731	primiparity;code_bep_n;m_bmiincl;m_hbincl;ga_days_incl;GWG;w_age;m_heightincl;m_muacincl	FALSE
NAD	Vitamins: NAD	1–2m	Pre+Postnatal	-298.185	-1045.49	449.123	-4	0.431443	0.487719	primiparity;m_hbincl;ga_days_incl;GWG;w_age;m_muacincl	FALSE
NAD	Vitamins: NAD	1–2m	Prenatal	-423.515	-1085.16	238.134	-4	0.207656	0.75824	primiparity;GWG	FALSE
B3	Vitamins: B3	1–2m	Prenatal	-38.5913	-237.763	160.58	-4	0.70202	0.869167	primiparity;code_bep_n;m_bmiincl;m_hbincl;ga_days_incl;GWG;w_age;m_muacincl	FALSE
TRP	Vitamins: TRP	1–2m	Prenatal	-44.18	-103.062	14.7018	-4	0.14008	0.75824	primiparity;code_bep_n;m_bmiincl;ga_days_incl;w_age;m_heightincl;m_muacincl	FALSE
NAD	Vitamins: NAD	1–2m	Postnatal	-434.717	-1019.33	149.901	-4	0.143899	0.213595	m_bmiincl;m_hbincl;ga_days_incl;w_age;m_muacincl	FALSE
NAM	Vitamins: NAM	3–4m	Prenatal	-36	-75.1364	3.13642	-4	0.0710779	0.946605	m_bmiincl	FALSE
NAD	Vitamins: NAD	3–4m	Prenatal	-204.127	-594.412	186.157	-4	0.302587	0.946605	primiparity;code_bep_n;m_hbincl;ga_days_incl;w_age;m_heightincl	FALSE
NMN	Vitamins: NMN	3–4m	Prenatal	-57.7329	-135.915	20.4488	-4	0.146406	0.946605	primiparity;m_bmiincl;m_muacincl	FALSE	FALSE	TRUE	0.945
NR	Vitamins: NR	3–4m	Prenatal	-68.4025	-216.393	79.5875	-4	0.362049	0.946605	primiparity;code_bep_n;m_bmiincl;ga_days_incl;w_age;m_muacincl	FALSE	FALSE	TRUE	0.969136
B3	Vitamins: B3	3–4m	Prenatal	-117.721	-277.762	42.319	-4	0.147958	0.946605	primiparity;code_bep_n;m_bmiincl;ga_days_incl	FALSE
PA	Vitamins: PA	3–4m	Prenatal	-38.8351	-276.69	199.02	-4	0.747071	0.946605	primiparity;code_bep_n;m_bmiincl;m_hbincl;ga_days_incl;GWG;w_age;m_heightincl;m_muacincl	FALSE	TRUE	TRUE	0.969136
PA	Vitamins: PA	3–4m	Prenatal	-38.8351	-276.69	199.02	-4	0.747071	0.946605	primiparity;code_bep_n;m_bmiincl;m_hbincl;ga_days_incl;GWG;w_age;m_heightincl;m_muacincl	FALSE	TRUE	FALSE	0.617647
PA	Vitamins: PA	3–4m	Prenatal	-38.8351	-276.69	199.02	-4	0.747071	0.946605	primiparity;code_bep_n;m_bmiincl;m_hbincl;ga_days_incl;GWG;w_age;m_heightincl;m_muacincl	FALSE	TRUE	TRUE	0.945
Nufa	Vitamins: Nufa	3–4m	Postnatal	171.788	128.129	215.446	4	1.0159e-12	1.32067e-11	w_age	TRUE	TRUE	TRUE	0.969136
DFLac_nmol.mL	HMOs: DFLac_nmol.mL	14–21d	Pre+Postnatal	-83.0725	-306.577	140.432	-4	0.463465	0.83614	primiparity;m_bmiincl;ga_days_incl;GWG;w_age;m_muacincl	FALSE
Nufa	Vitamins: Nufa	3–4m	Postnatal	171.788	128.129	215.446	4	1.0159e-12	1.32067e-11	w_age	TRUE	TRUE	TRUE	0.945
PA	Vitamins: PA	3–4m	Postnatal	1692.43	1390.36	1994.5	4	2.39228e-21	6.21992e-20		TRUE	TRUE	TRUE	0.969136
Fuc_nmol.mL	HMOs: Fuc_nmol.mL	14–21d	Pre+Postnatal	-2097.58	-4255.5	60.3352	-4	0.0566609	0.283304	m_bmiincl;GWG;m_muacincl	FALSE
X2.FL_nmol.mL	HMOs: X2.FL_nmol.mL	14–21d	Prenatal	-641.233	-2313.89	1031.43	-4	0.4494	0.831497	primiparity;m_bmiincl;m_heightincl	FALSE
X3FL_nmol.mL	HMOs: X3FL_nmol.mL	14–21d	Prenatal	-131.543	-592.359	329.272	-4	0.572955	0.831497	primiparity;code_bep_n;m_bmiincl;m_hbincl;ga_days_incl;GWG;w_age;m_heightincl;m_muacincl	FALSE
DFLac_nmol.mL	HMOs: DFLac_nmol.mL	14–21d	Prenatal	-152.755	-398.91	93.4002	-4	0.22169	0.767011	m_bmiincl	FALSE
LNT_nmol.mL	HMOs: LNT_nmol.mL	14–21d	Prenatal	-96.0289	-727.74	535.682	-4	0.763922	0.831497	primiparity;code_bep_n;m_bmiincl;m_hbincl;ga_days_incl;GWG;w_age;m_heightincl;m_muacincl	FALSE
LNFP.I_nmol.mL	HMOs: LNFP.I_nmol.mL	14–21d	Prenatal	-93.1046	-635.433	449.224	-4	0.734505	0.831497	code_bep_n;m_bmiincl;m_hbincl;ga_days_incl;GWG;w_age;m_heightincl;m_muacincl	FALSE
LNFP.II_nmol.mL	HMOs: LNFP.II_nmol.mL	14–21d	Prenatal	-155.33	-488.401	177.741	-4	0.357623	0.831497	primiparity;code_bep_n;m_bmiincl;m_hbincl;ga_days_incl;GWG;w_age;m_heightincl;m_muacincl	FALSE
DFLNT_nmol.mL	HMOs: DFLNT_nmol.mL	14–21d	Prenatal	-247.85	-612.1	116.399	-4	0.180492	0.767011	m_bmiincl;GWG;m_heightincl	FALSE
SUM_nmol.mL	HMOs: SUM_nmol.mL	14–21d	Prenatal	-1612.25	-3503.28	278.781	-4	0.0940002	0.767011	primiparity;code_bep_n;m_hbincl;ga_days_incl;GWG;w_age;m_muacincl	FALSE
Sia_nmol.mL	HMOs: Sia_nmol.mL	14–21d	Prenatal	-97.4332	-611.803	416.936	-4	0.708253	0.831497	primiparity;code_bep_n;m_bmiincl;m_hbincl;ga_days_incl;GWG;w_age;m_heightincl;m_muacincl	FALSE
Fuc_nmol.mL	HMOs: Fuc_nmol.mL	14–21d	Prenatal	-1880.84	-3996.31	234.633	-4	0.0809236	0.767011		FALSE
X2.FL_nmol.mL	HMOs: X2.FL_nmol.mL	14–21d	Postnatal	-458.071	-2010.9	1094.76	-4	0.560822	0.804703	m_bmiincl;m_hbincl;w_age	FALSE
X3FL_nmol.mL	HMOs: X3FL_nmol.mL	14–21d	Postnatal	-96.6855	-487.486	294.116	-4	0.625608	0.804703	code_bep_n;m_bmiincl;m_hbincl;w_age;m_heightincl;m_muacincl	FALSE
LNFP.I_nmol.mL	HMOs: LNFP.I_nmol.mL	14–21d	Postnatal	-172.184	-674.124	329.755	-4	0.498852	0.804703	primiparity;code_bep_n;ga_days_incl;GWG;w_age;m_heightincl;m_muacincl	FALSE
DFLNT_nmol.mL	HMOs: DFLNT_nmol.mL	14–21d	Postnatal	-102.792	-455.098	249.514	-4	0.565072	0.804703	m_bmiincl;m_hbincl;ga_days_incl;m_heightincl;m_muacincl	FALSE
SUM_nmol.mL	HMOs: SUM_nmol.mL	14–21d	Postnatal	-621.391	-2548.89	1306.11	-4	0.524982	0.804703	primiparity;code_bep_n;m_bmiincl;m_hbincl;ga_days_incl;GWG;w_age;m_heightincl;m_muacincl	FALSE
Fuc_nmol.mL	HMOs: Fuc_nmol.mL	14–21d	Postnatal	-1242.61	-3494.67	1009.46	-4	0.277359	0.804703	m_muacincl	FALSE
PA	Vitamins: PA	3–4m	Postnatal	1692.43	1390.36	1994.5	4	2.39228e-21	6.21992e-20		TRUE	TRUE	FALSE	0.617647
LNFP.I_nmol.mL	HMOs: LNFP.I_nmol.mL	1–2m	Pre+Postnatal	-261.521	-528.701	5.65818	-4	0.0549827	0.687283	primiparity;m_bmiincl;w_age;m_muacincl	FALSE	FALSE	TRUE	0.652047
SUM_nmol.mL	HMOs: SUM_nmol.mL	1–2m	Pre+Postnatal	-1036.84	-2450.66	376.982	-4	0.149307	0.785089	primiparity;m_bmiincl;w_age;m_muacincl	FALSE
Fuc_nmol.mL	HMOs: Fuc_nmol.mL	1–2m	Pre+Postnatal	-1065.13	-2658.52	528.261	-4	0.188421	0.785089	primiparity;m_bmiincl;GWG;w_age;m_muacincl	FALSE
X2.FL_nmol.mL	HMOs: X2.FL_nmol.mL	1–2m	Prenatal	-431.032	-1734.57	872.507	-4	0.514065	0.964827	primiparity;m_bmiincl;m_hbincl;w_age;m_heightincl;m_muacincl	FALSE
PA	Vitamins: PA	3–4m	Postnatal	1692.43	1390.36	1994.5	4	2.39228e-21	6.21992e-20		TRUE	TRUE	TRUE	0.945
LNFP.II_nmol.mL	HMOs: LNFP.II_nmol.mL	1–2m	Prenatal	-78.3403	-272.734	116.054	-4	0.426601	0.964827	primiparity;code_bep_n;m_bmiincl;m_hbincl;ga_days_incl;GWG;w_age;m_heightincl;m_muacincl	FALSE
DFLNT_nmol.mL	HMOs: DFLNT_nmol.mL	1–2m	Prenatal	-154.903	-355.184	45.3784	-4	0.128414	0.964827	m_bmiincl;w_age	FALSE
SUM_nmol.mL	HMOs: SUM_nmol.mL	1–2m	Prenatal	-695.681	-2243.21	851.852	-4	0.375383	0.964827	primiparity;m_bmiincl;m_hbincl;m_heightincl;m_muacincl	FALSE
Fuc_nmol.mL	HMOs: Fuc_nmol.mL	1–2m	Prenatal	-1000.73	-2522.33	520.871	-4	0.195524	0.964827	m_heightincl	FALSE
X2.FL_nmol.mL	HMOs: X2.FL_nmol.mL	1–2m	Postnatal	-321.767	-1495.23	851.691	-4	0.588831	0.98932	primiparity;m_bmiincl;GWG;w_age;m_muacincl	FALSE
DFLac_nmol.mL	HMOs: DFLac_nmol.mL	1–2m	Postnatal	-93.1897	-217.33	30.9509	-4	0.140157	0.98932	w_age;m_muacincl	FALSE
SUM_nmol.mL	HMOs: SUM_nmol.mL	1–2m	Postnatal	-350.263	-1715.18	1014.65	-4	0.612903	0.98932	primiparity;code_bep_n;m_bmiincl;m_hbincl;GWG;w_age;m_heightincl;m_muacincl	FALSE
Fuc_nmol.mL	HMOs: Fuc_nmol.mL	1–2m	Postnatal	-637.387	-2058.61	783.839	-4	0.37705	0.98932	primiparity;m_bmiincl;w_age;m_muacincl	FALSE
TRP	Vitamins: TRP	3–4m	Postnatal	78.926	28.9312	128.921	4	0.00217405	0.00471043	primiparity;m_hbincl;GWG;w_age;m_muacincl	TRUE
DFLac_nmol.mL	HMOs: DFLac_nmol.mL	3–4m	Pre+Postnatal	-77.0489	-212.639	58.5415	-4	0.263067	0.43331	primiparity;m_hbincl;ga_days_incl;w_age;m_muacincl	FALSE
LNFP.I_nmol.mL	HMOs: LNFP.I_nmol.mL	3–4m	Pre+Postnatal	-191.743	-438.576	55.0897	-4	0.126806	0.357509	primiparity;m_bmiincl;ga_days_incl;m_muacincl	FALSE
SUM_nmol.mL	HMOs: SUM_nmol.mL	3–4m	Pre+Postnatal	-643.107	-1873.21	586.998	-4	0.302989	0.436563	m_bmiincl;m_hbincl;GWG;w_age;m_muacincl	FALSE
Fuc_nmol.mL	HMOs: Fuc_nmol.mL	3–4m	Pre+Postnatal	-890.372	-2248.27	467.527	-4	0.196909	0.386754	m_bmiincl;ga_days_incl;GWG;w_age;m_muacincl	FALSE
X2.FL_nmol.mL	HMOs: X2.FL_nmol.mL	3–4m	Prenatal	-241.796	-1505.82	1022.23	-4	0.705567	0.860844	primiparity;m_bmiincl;ga_days_incl;GWG;w_age;m_heightincl;m_muacincl	FALSE
X3FL_nmol.mL	HMOs: X3FL_nmol.mL	3–4m	Prenatal	-86.5726	-722.575	549.429	-4	0.788015	0.860844	primiparity;code_bep_n;m_bmiincl;m_hbincl;ga_days_incl;GWG;w_age;m_muacincl	FALSE
DFLac_nmol.mL	HMOs: DFLac_nmol.mL	3–4m	Prenatal	-125.098	-271.237	21.0415	-4	0.0927241	0.621019	primiparity;GWG;w_age	FALSE
LNFP.II_nmol.mL	HMOs: LNFP.II_nmol.mL	3–4m	Prenatal	-117.049	-269.483	35.3846	-4	0.13109	0.621019	primiparity;m_bmiincl;m_hbincl;w_age;m_muacincl	FALSE	TRUE	FALSE	0.646154
DFLNT_nmol.mL	HMOs: DFLNT_nmol.mL	3–4m	Prenatal	-79.9844	-242.971	83.0027	-4	0.333306	0.775217	primiparity;w_age;m_muacincl	FALSE
SUM_nmol.mL	HMOs: SUM_nmol.mL	3–4m	Prenatal	-545.405	-1907.7	816.889	-4	0.429605	0.826163	m_bmiincl;m_hbincl;w_age;m_heightincl;m_muacincl	FALSE
Fuc_nmol.mL	HMOs: Fuc_nmol.mL	3–4m	Prenatal	-714.884	-2119.71	689.94	-4	0.315839	0.775217	primiparity;w_age	FALSE
X2.FL_nmol.mL	HMOs: X2.FL_nmol.mL	3–4m	Postnatal	-274.593	-1426.03	876.845	-4	0.638161	0.996267	m_bmiincl;ga_days_incl;w_age;m_heightincl;m_muacincl	FALSE
X3FL_nmol.mL	HMOs: X3FL_nmol.mL	3–4m	Postnatal	-198.406	-740.709	343.898	-4	0.470851	0.996267	m_bmiincl;m_hbincl;GWG;w_age;m_heightincl	FALSE
DFLac_nmol.mL	HMOs: DFLac_nmol.mL	3–4m	Postnatal	-96.2947	-228.855	36.2655	-4	0.153272	0.996267	primiparity;m_hbincl;ga_days_incl;w_age	FALSE
LNFP.I_nmol.mL	HMOs: LNFP.I_nmol.mL	3–4m	Postnatal	-110.756	-319.871	98.3599	-4	0.296976	0.996267	primiparity;m_bmiincl;ga_days_incl;GWG;w_age;m_muacincl	FALSE
SUM_nmol.mL	HMOs: SUM_nmol.mL	3–4m	Postnatal	-870.54	-2082.36	341.281	-4	0.157863	0.996267	primiparity;m_muacincl	FALSE
Fuc_nmol.mL	HMOs: Fuc_nmol.mL	3–4m	Postnatal	-878.634	-2191.99	434.718	-4	0.18823	0.996267	m_hbincl;w_age;m_heightincl	FALSE

## Sheet: milk_metabolites
feature	timepoint	intervention	estimate	conf.low	conf.high	estimate_scaled	p.value	q.value	covariate	sig	from_xgb	from_boruta	best_auc
C0	14–21d	Pre+Postnatal	-0.538192	-5.61024	4.53385	-1.15649	0.834036	0.972121	primiparity;code_bep_n;m_bmiincl;m_hbincl;ga_days_incl;GWG;w_age;m_heightincl;m_muacincl	FALSE
C2	14–21d	Pre+Postnatal	-1.95882	-6.0772	2.15955	-4	0.34844	0.832476	primiparity;code_bep_n;m_bmiincl;ga_days_incl;GWG;w_age;m_heightincl;m_muacincl	FALSE
C3	14–21d	Pre+Postnatal	-0.162356	-0.387649	0.0629357	-0.260778	0.15638	0.764343	m_bmiincl;w_age;m_muacincl	FALSE
C4	14–21d	Pre+Postnatal	-0.0871283	-0.313264	0.139007	-0.0814904	0.447311	0.884398	primiparity;code_bep_n;m_bmiincl;ga_days_incl;w_age;m_heightincl	FALSE
C6..C4.1.DC.	14–21d	Pre+Postnatal	-0.0160492	-0.0580466	0.0259482	0.0879092	0.450975	0.884398	primiparity;m_bmiincl;m_hbincl;ga_days_incl;w_age;m_heightincl;m_muacincl	FALSE
C12	14–21d	Pre+Postnatal	0.0597596	-0.134747	0.254266	0.268581	0.54436	0.909852	primiparity;m_hbincl;ga_days_incl;GWG;w_age;m_muacincl	FALSE
C12.1	14–21d	Pre+Postnatal	0.00180735	-0.0251317	0.0287464	0.130466	0.894606	0.979314	primiparity;code_bep_n;m_bmiincl;m_hbincl;ga_days_incl;GWG;w_age;m_muacincl	FALSE
C14	14–21d	Pre+Postnatal	-0.0249549	-0.285868	0.235959	0.0666846	0.850223	0.979314	primiparity;code_bep_n;m_bmiincl;m_hbincl;GWG;w_age	FALSE
C14.2.OH	14–21d	Pre+Postnatal	-0.00405842	-0.0119047	0.0037879	0.116486	0.308089	0.804878	primiparity;code_bep_n;m_hbincl;ga_days_incl;GWG;w_age	FALSE
C18	14–21d	Pre+Postnatal	0.00249252	-0.00383604	0.00882109	0.132099	0.437306	0.884398	primiparity;m_bmiincl;GWG;w_age;m_muacincl	FALSE
TMAO	14–21d	Pre+Postnatal	-0.49638	-1.99778	1.00502	-1.05684	0.514198	0.90357	primiparity;code_bep_n;m_bmiincl;ga_days_incl;GWG;w_age;m_heightincl;m_muacincl	FALSE	TRUE	FALSE	0.677686
X1.Met.His	14–21d	Pre+Postnatal	0.0172223	-0.0768957	0.11134	0.167204	0.717897	0.960673	primiparity;code_bep_n;m_bmiincl;m_hbincl;ga_days_incl;GWG;w_age;m_heightincl;m_muacincl	FALSE
X3.Met.His	14–21d	Pre+Postnatal	-0.116315	-0.289735	0.0571056	-0.151049	0.186848	0.764343	primiparity;code_bep_n;m_bmiincl;m_hbincl;GWG;w_age;m_heightincl;m_muacincl	FALSE
AABA	14–21d	Pre+Postnatal	0.192181	-0.34517	0.729533	0.584175	0.480508	0.885427	primiparity;code_bep_n;m_hbincl;ga_days_incl;w_age;m_heightincl	FALSE
alpha.AAA	14–21d	Pre+Postnatal	0.344373	-0.310352	0.999097	0.946886	0.299977	0.792796	primiparity;m_hbincl;ga_days_incl;GWG;w_age;m_heightincl;m_muacincl	FALSE
Cit	14–21d	Pre+Postnatal	-0.1571	-1.0065	0.692302	-0.248251	0.714997	0.960673	primiparity;code_bep_n;m_bmiincl;m_hbincl;ga_days_incl;GWG;w_age;m_heightincl;m_muacincl	FALSE
Creatinine	14–21d	Pre+Postnatal	0.940393	-1.90874	3.78952	2.36735	0.514872	0.90357	primiparity;code_bep_n;m_bmiincl;m_hbincl;ga_days_incl;GWG;w_age;m_heightincl;m_muacincl	FALSE
Cystine	14–21d	Pre+Postnatal	-5.0539	-9.98488	-0.122914	-4	0.0446323	0.495418	primiparity	TRUE
HArg	14–21d	Pre+Postnatal	0.00287154	-0.0171916	0.0229347	0.133002	0.777483	0.960748	primiparity;code_bep_n;m_bmiincl;m_hbincl;ga_days_incl;GWG;w_age;m_heightincl;m_muacincl	FALSE
Kynurenine	14–21d	Pre+Postnatal	0.013243	-0.0944927	0.120979	0.15772	0.808224	0.960748	primiparity;code_bep_n;m_bmiincl;m_hbincl;ga_days_incl;GWG;w_age;m_heightincl;m_muacincl	FALSE
Met.SO	14–21d	Pre+Postnatal	-0.00155855	-0.147647	0.14453	0.122444	0.983191	0.992154	primiparity;code_bep_n;m_bmiincl;m_hbincl;ga_days_incl;GWG;w_age;m_heightincl;m_muacincl	FALSE
Orn	14–21d	Pre+Postnatal	-0.380945	-1.48216	0.720272	-0.78173	0.494908	0.886335	primiparity;code_bep_n;m_bmiincl;m_hbincl;ga_days_incl;GWG;w_age;m_heightincl;m_muacincl	FALSE
ProBetaine	14–21d	Pre+Postnatal	0.013295	-0.161931	0.188521	0.157844	0.8809	0.979314	primiparity;code_bep_n;m_bmiincl;m_hbincl;ga_days_incl;GWG;w_age;m_heightincl;m_muacincl	FALSE
SDMA	14–21d	Pre+Postnatal	-0.0103199	-0.0287436	0.0081038	0.101564	0.269794	0.764343	primiparity;code_bep_n;m_bmiincl;m_hbincl;ga_days_incl;GWG;w_age;m_heightincl;m_muacincl	FALSE
t4.OH.Pro	14–21d	Pre+Postnatal	-1.3345	-5.62115	2.95215	-3.05429	0.539037	0.909852	primiparity;m_bmiincl;m_hbincl;ga_days_incl;GWG;w_age	FALSE
Taurine	14–21d	Pre+Postnatal	23.7294	-20.5541	68.0128	4	0.291075	0.773877	primiparity;m_hbincl;GWG;w_age;m_muacincl	FALSE
TrpBetaine	14–21d	Pre+Postnatal	-0.0673644	-0.559038	0.424309	-0.0343879	0.786752	0.960748	primiparity;m_bmiincl;m_hbincl;ga_days_incl;GWG;w_age;m_heightincl;m_muacincl	FALSE
Ala	14–21d	Pre+Postnatal	4.14978	-53.9155	62.215	4	0.887768	0.979314	primiparity;code_bep_n;m_bmiincl;m_hbincl;ga_days_incl;GWG;w_age;m_heightincl;m_muacincl	FALSE
Arg	14–21d	Pre+Postnatal	-3.29941	-6.83248	0.233654	-4	0.0669454	0.61411	primiparity;m_bmiincl;w_age;m_muacincl	FALSE
Asn	14–21d	Pre+Postnatal	-2.62465	-7.6999	2.4506	-4	0.308174	0.804878	code_bep_n;m_hbincl;ga_days_incl;GWG;m_heightincl;m_muacincl	FALSE	TRUE	FALSE	0.677686
Asp	14–21d	Pre+Postnatal	6.60509	-8.36485	21.575	4	0.384323	0.847849	primiparity;m_bmiincl;m_hbincl;ga_days_incl;GWG;w_age	FALSE
Cys	14–21d	Pre+Postnatal	-3.27853	-5.60206	-0.955002	-4	0.00602438	0.106993	w_age	TRUE	TRUE	FALSE	0.762238
Cys	14–21d	Pre+Postnatal	-3.27853	-5.60206	-0.955002	-4	0.00602438	0.106993	w_age	TRUE	TRUE	FALSE	0.677686
Gln	14–21d	Pre+Postnatal	15.9433	-55.7195	87.606	4	0.660529	0.940351	primiparity;code_bep_n;m_bmiincl;m_hbincl;ga_days_incl;GWG;w_age;m_heightincl;m_muacincl	FALSE
Glu	14–21d	Pre+Postnatal	1.18242	-141.051	143.416	2.94416	0.986902	0.992154	primiparity;code_bep_n;m_bmiincl;m_hbincl;ga_days_incl;GWG;w_age;m_heightincl;m_muacincl	FALSE
Gly	14–21d	Pre+Postnatal	-7.60556	-28.8656	13.6545	-4	0.480326	0.885427	primiparity;code_bep_n;m_bmiincl;m_hbincl;ga_days_incl;GWG;w_age;m_heightincl;m_muacincl	FALSE
His	14–21d	Pre+Postnatal	1.92398	-2.38465	6.23262	4	0.378614	0.847849	primiparity;code_bep_n;m_hbincl;ga_days_incl;GWG;w_age;m_heightincl;m_muacincl	FALSE
Ile	14–21d	Pre+Postnatal	-0.495982	-2.1147	1.12274	-1.05589	0.54545	0.909852	primiparity;code_bep_n;m_bmiincl;m_hbincl;w_age;m_heightincl;m_muacincl	FALSE
Leu	14–21d	Pre+Postnatal	-2.04969	-5.73486	1.63548	-4	0.273258	0.764343	primiparity;ga_days_incl;GWG	FALSE
Lys	14–21d	Pre+Postnatal	-2.75203	-7.49402	1.98997	-4	0.253012	0.764343	primiparity;code_bep_n;m_bmiincl;m_hbincl;ga_days_incl;w_age;m_muacincl	FALSE
Met	14–21d	Pre+Postnatal	-0.277333	-1.16697	0.612309	-0.534796	0.538532	0.909852	code_bep_n;m_hbincl;ga_days_incl;m_heightincl;m_muacincl	FALSE
Phe	14–21d	Pre+Postnatal	-0.324876	-2.0104	1.36065	-0.648104	0.70357	0.960673	primiparity;m_bmiincl;m_hbincl;ga_days_incl;GWG;w_age;m_muacincl	FALSE
Pro	14–21d	Pre+Postnatal	-5.02743	-10.9798	0.924953	-4	0.097152	0.756763	primiparity;m_hbincl;w_age	FALSE
Ser	14–21d	Pre+Postnatal	-4.50376	-20.0664	11.0589	-4	0.567929	0.909852	primiparity;m_bmiincl;m_hbincl;ga_days_incl;GWG;w_age;m_muacincl	FALSE
Thr	14–21d	Pre+Postnatal	-6.61238	-16.9466	3.72184	-4	0.207807	0.764343	primiparity;code_bep_n;m_hbincl;ga_days_incl;GWG;w_age;m_heightincl;m_muacincl	FALSE
Trp	14–21d	Pre+Postnatal	0.0272143	-0.464302	0.518731	0.191017	0.912934	0.979314	primiparity;code_bep_n;m_bmiincl;m_hbincl;ga_days_incl;GWG;w_age;m_heightincl;m_muacincl	FALSE
Tyr	14–21d	Pre+Postnatal	-0.275422	-2.50364	1.9528	-0.530242	0.807176	0.960748	primiparity;code_bep_n;m_bmiincl;m_hbincl;ga_days_incl;GWG;w_age;m_heightincl;m_muacincl	FALSE
Val	14–21d	Pre+Postnatal	-1.82234	-6.54956	2.90489	-4	0.447002	0.884398	primiparity;code_bep_n;m_bmiincl;m_hbincl;ga_days_incl;GWG;w_age;m_heightincl;m_muacincl	FALSE
beta.Ala	14–21d	Pre+Postnatal	0.00924913	-0.181057	0.199556	0.148202	0.923548	0.979314	primiparity;code_bep_n;m_bmiincl;m_hbincl;GWG;w_age;m_muacincl	FALSE
GABA	14–21d	Pre+Postnatal	-0.00334956	-0.0366308	0.0299317	0.118176	0.842468	0.977903	primiparity;code_bep_n;m_bmiincl;m_hbincl;ga_days_incl;GWG;w_age;m_heightincl;m_muacincl	FALSE
Putrescine	14–21d	Pre+Postnatal	-0.11179	-0.404773	0.181193	-0.140265	0.451649	0.884398	primiparity;code_bep_n;m_bmiincl;m_hbincl;ga_days_incl;GWG;w_age;m_heightincl;m_muacincl	FALSE
Spermidine	14–21d	Pre+Postnatal	-0.408202	-1.72562	0.909214	-0.846691	0.540903	0.909852	primiparity;code_bep_n;m_bmiincl;m_hbincl;ga_days_incl;GWG;w_age;m_heightincl;m_muacincl	FALSE
Spermine	14–21d	Pre+Postnatal	-0.898592	-1.94071	0.143526	-2.01541	0.0904039	0.716773	primiparity;code_bep_n;m_bmiincl;m_hbincl;ga_days_incl;GWG;w_age;m_heightincl;m_muacincl	FALSE
H1	14–21d	Pre+Postnatal	111.754	-8.22736	231.735	4	0.0676561	0.61411	primiparity;w_age	FALSE
AconAcid	14–21d	Pre+Postnatal	0.057633	-1.51537	1.63063	0.263512	0.942327	0.982144	primiparity;code_bep_n;m_bmiincl;m_hbincl;ga_days_incl;GWG;w_age	FALSE
HipAcid	14–21d	Pre+Postnatal	-4.74891	-12.4854	2.98757	-4	0.226781	0.764343	code_bep_n;m_bmiincl;m_hbincl;ga_days_incl;GWG;w_age;m_heightincl;m_muacincl	FALSE
OH.GlutAcid	14–21d	Pre+Postnatal	-0.0482129	-0.223977	0.127552	0.011255	0.588261	0.916449	code_bep_n;m_bmiincl;m_hbincl;ga_days_incl;GWG;w_age;m_heightincl;m_muacincl	FALSE
Cer.d16.1.20.0.	14–21d	Pre+Postnatal	-0.042548	-0.0956519	0.0105558	0.0247557	0.115389	0.764343	primiparity;code_bep_n;ga_days_incl;w_age	FALSE
Cer.d16.1.22.0.	14–21d	Pre+Postnatal	-0.0776999	-0.206376	0.0509758	-0.0590202	0.234389	0.764343	primiparity;code_bep_n;m_bmiincl;m_hbincl;ga_days_incl;w_age;m_heightincl;m_muacincl	FALSE
Cer.d16.1.24.0.	14–21d	Pre+Postnatal	-0.0572502	-0.162536	0.0480359	-0.0102833	0.284007	0.764343	primiparity;code_bep_n;m_hbincl;ga_days_incl;GWG;w_age;m_heightincl;m_muacincl	FALSE
Cer.d18.1.14.0.	14–21d	Pre+Postnatal	-0.0136107	-0.0895972	0.0623758	0.0937208	0.723608	0.960673	primiparity;code_bep_n;m_bmiincl;m_hbincl;ga_days_incl;GWG;w_age;m_heightincl;m_muacincl	FALSE
Cer.d18.1.16.0.	14–21d	Pre+Postnatal	-0.0247958	-0.130736	0.0811442	0.0670639	0.644067	0.925455	primiparity;code_bep_n;m_bmiincl;m_hbincl;ga_days_incl;GWG;w_age;m_heightincl;m_muacincl	FALSE
Cer.d18.1.18.0.	14–21d	Pre+Postnatal	-0.0644931	-0.161135	0.0321493	-0.0275449	0.189058	0.764343	primiparity;code_bep_n;m_bmiincl;ga_days_incl;GWG;w_age;m_heightincl;m_muacincl	FALSE
Cer.d18.1.20.0.OH..	14–21d	Pre+Postnatal	-0.198698	-0.504223	0.106828	-0.347388	0.200509	0.764343	primiparity;code_bep_n;m_bmiincl;ga_days_incl;w_age;m_heightincl;m_muacincl	FALSE
Cer.d18.1.20.0.	14–21d	Pre+Postnatal	-0.0468727	-0.129799	0.0360532	0.0144488	0.265522	0.764343	primiparity;code_bep_n;ga_days_incl;GWG;w_age;m_heightincl;m_muacincl	FALSE
Cer.d18.1.22.0.	14–21d	Pre+Postnatal	-0.139782	-0.356347	0.0767822	-0.206978	0.203865	0.764343	primiparity;code_bep_n;m_bmiincl;m_hbincl;ga_days_incl;GWG;w_age;m_heightincl;m_muacincl	FALSE
Cer.d18.1.23.0.	14–21d	Pre+Postnatal	-0.0373546	-0.0951107	0.0204016	0.0371331	0.203014	0.764343	primiparity;m_hbincl;GWG;w_age	FALSE
Cer.d18.1.24.0.	14–21d	Pre+Postnatal	-0.42658	-0.996193	0.143032	-0.890491	0.140846	0.764343	primiparity;code_bep_n;m_bmiincl;m_hbincl;ga_days_incl;GWG;w_age;m_heightincl;m_muacincl	FALSE
Cer.d18.1.24.1.	14–21d	Pre+Postnatal	-0.123463	-0.558959	0.312032	-0.168086	0.57583	0.909852	primiparity;code_bep_n;m_bmiincl;ga_days_incl;GWG;w_age;m_heightincl;m_muacincl	FALSE
Cer.d18.2.20.0.	14–21d	Pre+Postnatal	-0.00665859	-0.0307152	0.017398	0.110289	0.58487	0.915769	primiparity;code_bep_n;m_bmiincl;m_hbincl;ga_days_incl;GWG;w_age;m_heightincl;m_muacincl	FALSE
Cer.d18.2.22.0.	14–21d	Pre+Postnatal	-0.0217629	-0.0661651	0.0226392	0.0742919	0.333991	0.832476	primiparity;code_bep_n;m_bmiincl;ga_days_incl;GWG;w_age;m_heightincl;m_muacincl	FALSE
Cer.d18.2.24.0.	14–21d	Pre+Postnatal	-0.0506225	-0.123529	0.0222845	0.00551234	0.171881	0.764343	primiparity;code_bep_n;m_bmiincl;m_hbincl;ga_days_incl;GWG;w_age;m_heightincl;m_muacincl	FALSE
Cer.d18.2.24.1.	14–21d	Pre+Postnatal	-0.0117141	-0.0519202	0.0284919	0.0982408	0.565296	0.909852	primiparity;code_bep_n;m_bmiincl;m_hbincl;ga_days_incl;GWG;w_age;m_heightincl;m_muacincl	FALSE
CE.14.0.	14–21d	Pre+Postnatal	-0.583782	-1.50335	0.335789	-1.26514	0.211444	0.764343	m_hbincl;w_age	FALSE
CE.16.0.	14–21d	Pre+Postnatal	-0.26162	-0.786833	0.263594	-0.497347	0.326203	0.832476	primiparity;code_bep_n;m_bmiincl;m_hbincl;GWG;w_age;m_heightincl;m_muacincl	FALSE
CE.18.0.	14–21d	Pre+Postnatal	-0.0832752	-0.22728	0.0607294	-0.0723074	0.254683	0.764343	primiparity;code_bep_n;m_bmiincl;m_hbincl;ga_days_incl;w_age;m_heightincl;m_muacincl	FALSE
CE.18.1.	14–21d	Pre+Postnatal	-0.0413751	-0.582218	0.499468	0.0275511	0.879922	0.979314	primiparity;code_bep_n;m_bmiincl;m_hbincl;ga_days_incl;GWG;w_age;m_heightincl;m_muacincl	FALSE
CE.18.2.	14–21d	Pre+Postnatal	0.0991995	-0.545932	0.744331	0.362576	0.761442	0.960748	primiparity;m_bmiincl;m_hbincl;ga_days_incl;GWG;w_age;m_muacincl	FALSE
CE.18.3.	14–21d	Pre+Postnatal	0.0482127	0.00592799	0.0904974	0.241062	0.0257509	0.336276	m_bmiincl;ga_days_incl;m_muacincl	TRUE
CE.20.4.	14–21d	Pre+Postnatal	-0.021526	-0.125062	0.0820099	0.0748566	0.68148	0.956636	primiparity;code_bep_n;m_bmiincl;m_hbincl;ga_days_incl;GWG;w_age;m_heightincl;m_muacincl	FALSE
CE.22.6.	14–21d	Pre+Postnatal	-0.0019915	-0.0478779	0.0438949	0.121412	0.9317	0.979314	primiparity;code_bep_n;m_bmiincl;m_hbincl;ga_days_incl;GWG;w_age;m_heightincl;m_muacincl	FALSE
p.Cresol.SO4	14–21d	Pre+Postnatal	0.418398	-0.0940134	0.93081	1.12331	0.10868	0.764343	GWG	FALSE
DG.14.0_18.1.	14–21d	Pre+Postnatal	-4.55115	-11.3188	2.21655	-4	0.185722	0.764343	primiparity;code_bep_n;m_bmiincl;m_hbincl;m_heightincl;m_muacincl	FALSE
DG.14.0_18.2.	14–21d	Pre+Postnatal	-4.90415	-13.6941	3.88585	-4	0.271744	0.764343	m_bmiincl;m_hbincl;w_age;m_heightincl;m_muacincl	FALSE
DG.16.0_16.1.	14–21d	Pre+Postnatal	-0.834787	-1.65818	-0.0113942	-1.86335	0.0469568	0.508232	m_bmiincl;m_hbincl;m_muacincl	TRUE
DG.16.0_18.1.	14–21d	Pre+Postnatal	-3.74394	-9.79065	2.30276	-4	0.222807	0.764343	primiparity;code_bep_n;m_bmiincl;m_hbincl;GWG;m_heightincl;m_muacincl	FALSE
DG.16.0_18.2.	14–21d	Pre+Postnatal	-3.26451	-9.17433	2.64532	-4	0.276508	0.764343	m_bmiincl;m_hbincl;ga_days_incl;w_age;m_muacincl	FALSE
DG.16.0_20.3.	14–21d	Pre+Postnatal	-0.156326	-0.441216	0.128563	-0.246407	0.279689	0.764343	m_bmiincl;m_hbincl;ga_days_incl;w_age;m_muacincl	FALSE
DG.16.1_18.0.	14–21d	Pre+Postnatal	-0.0731565	-0.140031	-0.00628166	-0.0481921	0.0322682	0.409345	m_bmiincl;m_muacincl	TRUE
DG.16.1_18.1.	14–21d	Pre+Postnatal	-0.439918	-1.08286	0.203027	-0.922277	0.178221	0.764343	m_bmiincl;m_hbincl;m_heightincl;m_muacincl	FALSE
DG.16.1_18.2.	14–21d	Pre+Postnatal	-0.490205	-1.19786	0.217448	-1.04212	0.172917	0.764343	m_bmiincl;m_hbincl;ga_days_incl;w_age;m_muacincl	FALSE
DG.17.0_18.1.	14–21d	Pre+Postnatal	-0.111466	-0.291834	0.068901	-0.139494	0.223681	0.764343	primiparity;code_bep_n;m_bmiincl;ga_days_incl;w_age;m_heightincl;m_muacincl	FALSE
DG.18.1_18.1.	14–21d	Pre+Postnatal	-0.154336	-1.24387	0.935201	-0.241664	0.779724	0.960748	primiparity;code_bep_n;m_bmiincl;m_hbincl;GWG;w_age;m_heightincl;m_muacincl	FALSE
DG.18.1_18.2.	14–21d	Pre+Postnatal	-1.78197	-5.76946	2.20551	-4	0.378241	0.847849	primiparity;code_bep_n;m_bmiincl;m_hbincl;ga_days_incl;GWG;m_heightincl;m_muacincl	FALSE
DG.18.1_18.3.	14–21d	Pre+Postnatal	0.424466	0.0696455	0.779287	1.13777	0.0194176	0.27811	m_bmiincl;m_hbincl;ga_days_incl;m_muacincl	TRUE	TRUE	TRUE	0.85
DG.18.1_20.1.	14–21d	Pre+Postnatal	-0.00440065	-0.018962	0.0101607	0.115671	0.550908	0.909852	primiparity;code_bep_n;m_bmiincl;m_hbincl;ga_days_incl;GWG;w_age;m_heightincl;m_muacincl	FALSE
DG.18.1_20.2.	14–21d	Pre+Postnatal	-0.103878	-0.223858	0.0161014	-0.12141	0.0891142	0.716773	primiparity;code_bep_n;m_bmiincl;m_hbincl;GWG;w_age;m_heightincl;m_muacincl	FALSE
DG.18.1_20.3.	14–21d	Pre+Postnatal	-0.044445	-0.109889	0.0209988	0.0202348	0.181424	0.764343	primiparity;code_bep_n;m_bmiincl;m_hbincl;GWG;m_heightincl;m_muacincl	FALSE
DG.18.1_22.6.	14–21d	Pre+Postnatal	0.0950503	-0.468497	0.658597	0.352687	0.739157	0.960748	primiparity;m_hbincl;ga_days_incl;w_age;m_heightincl;m_muacincl	FALSE
DG.18.2_18.2.	14–21d	Pre+Postnatal	-1.97056	-6.49882	2.5577	-4	0.390862	0.850699	m_bmiincl;m_hbincl;ga_days_incl;GWG;w_age;m_muacincl	FALSE
DG.18.2_18.3.	14–21d	Pre+Postnatal	0.496733	0.0251698	0.968297	1.31	0.0391179	0.457061	m_bmiincl;m_hbincl;ga_days_incl;m_muacincl	TRUE
DG.18.3_20.2.	14–21d	Pre+Postnatal	0.00213287	-0.00895395	0.0132197	0.131242	0.70409	0.960673	primiparity;code_bep_n;m_bmiincl;m_hbincl;ga_days_incl;GWG;w_age;m_heightincl;m_muacincl	FALSE
Hex2Cer.d18.1.14.0.	14–21d	Pre+Postnatal	-0.00106706	-0.020782	0.0186479	0.123615	0.914896	0.979314	code_bep_n;m_bmiincl;m_hbincl;GWG;w_age;m_heightincl	FALSE
Hex2Cer.d18.1.16.0.	14–21d	Pre+Postnatal	0.0493761	-0.230681	0.329433	0.243834	0.727801	0.960748	primiparity;m_bmiincl;m_hbincl;ga_days_incl;GWG;m_muacincl	FALSE
Hex2Cer.d18.1.18.0.	14–21d	Pre+Postnatal	-0.0255792	-0.0706454	0.0194871	0.0651968	0.263545	0.764343	primiparity;code_bep_n;m_hbincl;ga_days_incl;GWG;w_age;m_muacincl	FALSE
Hex2Cer.d18.1.20.0.	14–21d	Pre+Postnatal	-0.0468272	-0.119413	0.0257582	0.0145574	0.204089	0.764343	primiparity;code_bep_n;m_bmiincl;m_hbincl;ga_days_incl;GWG;w_age;m_heightincl;m_muacincl	FALSE
Hex2Cer.d18.1.22.0.	14–21d	Pre+Postnatal	-0.0945364	-0.269764	0.0806912	-0.0991458	0.287753	0.769652	primiparity;code_bep_n;m_bmiincl;m_hbincl;ga_days_incl;GWG;w_age;m_heightincl;m_muacincl	FALSE
Hex2Cer.d18.1.24.0.	14–21d	Pre+Postnatal	-0.229778	-0.518782	0.0592251	-0.421462	0.118145	0.764343	primiparity;code_bep_n;m_bmiincl;m_hbincl;ga_days_incl;GWG;w_age;m_heightincl;m_muacincl	FALSE
Hex2Cer.d18.1.24.1.	14–21d	Pre+Postnatal	0.0274573	-0.149676	0.20459	0.191596	0.759574	0.960748	primiparity;m_bmiincl;m_hbincl;ga_days_incl;GWG;w_age;m_muacincl	FALSE	TRUE	FALSE	0.677686
AA	14–21d	Pre+Postnatal	-4.26365	-9.12847	0.601167	-4	0.085314	0.701471	m_bmiincl;m_hbincl;w_age;m_muacincl	FALSE
DHA	14–21d	Pre+Postnatal	-1.07454	-3.29661	1.14752	-2.43475	0.340514	0.832476	m_bmiincl;m_hbincl;GWG;w_age;m_muacincl	FALSE
EPA	14–21d	Pre+Postnatal	-0.171269	-1.56825	1.22571	-0.282019	0.808727	0.960748	primiparity;m_bmiincl;m_hbincl;ga_days_incl;GWG;w_age;m_muacincl	FALSE
FA.12.0.	14–21d	Pre+Postnatal	-185.46	-432.276	61.3553	-4	0.139557	0.764343	m_bmiincl;m_hbincl;w_age;m_heightincl;m_muacincl	FALSE	TRUE	FALSE	0.677686
FA.14.0.	14–21d	Pre+Postnatal	-199.662	-414.188	14.8634	-4	0.06786	0.61411	primiparity;m_bmiincl;m_hbincl;m_muacincl	FALSE
FA.18.1.	14–21d	Pre+Postnatal	-52.6312	-124.432	19.1695	-4	0.149436	0.764343	code_bep_n;m_bmiincl;m_hbincl;m_heightincl;m_muacincl	FALSE
FA.18.2.	14–21d	Pre+Postnatal	-21.4396	-48.9071	6.02778	-4	0.124974	0.764343	primiparity;m_bmiincl;m_hbincl;m_heightincl;m_muacincl	FALSE
FA.20.2.	14–21d	Pre+Postnatal	-3.29209	-7.67008	1.0859	-4	0.139269	0.764343	primiparity;m_bmiincl;m_hbincl;w_age;m_muacincl	FALSE
FA.20.3.	14–21d	Pre+Postnatal	-1.72247	-4.64606	1.20112	-3.97892	0.245951	0.764343	m_bmiincl;m_hbincl;w_age;m_muacincl	FALSE
HexCer.d16.1.22.0.	14–21d	Pre+Postnatal	-0.00844026	-0.0235491	0.0066686	0.106043	0.271083	0.764343	primiparity;code_bep_n;m_bmiincl;m_hbincl;ga_days_incl;GWG;w_age;m_heightincl;m_muacincl	FALSE
HexCer.d16.1.24.0.	14–21d	Pre+Postnatal	-0.0138175	-0.0340725	0.00643742	0.0932278	0.179473	0.764343	primiparity;code_bep_n;m_bmiincl;ga_days_incl;GWG;w_age;m_heightincl;m_muacincl	FALSE
HexCer.d18.1.14.0.	14–21d	Pre+Postnatal	0.0101371	-0.0284433	0.0487174	0.150318	0.604031	0.924792	primiparity;code_bep_n;m_bmiincl;m_hbincl;ga_days_incl;GWG;w_age;m_heightincl;m_muacincl	FALSE
HexCer.d18.1.16.0.	14–21d	Pre+Postnatal	-0.0106922	-0.081652	0.0602675	0.100676	0.766088	0.960748	primiparity;code_bep_n;m_hbincl;ga_days_incl;GWG;w_age;m_heightincl;m_muacincl	FALSE
HexCer.d18.1.18.0.	14–21d	Pre+Postnatal	-0.0366926	-0.0806546	0.00726942	0.0387108	0.101097	0.757419	primiparity;m_bmiincl;m_hbincl;ga_days_incl;GWG;w_age;m_muacincl	FALSE
HexCer.d18.1.20.0.	14–21d	Pre+Postnatal	-0.0665418	-0.15699	0.0239062	-0.0324275	0.147926	0.764343	primiparity;code_bep_n;m_bmiincl;m_hbincl;ga_days_incl;GWG;w_age;m_heightincl;m_muacincl	FALSE
HexCer.d18.1.22.0.	14–21d	Pre+Postnatal	-0.268474	-0.825958	0.28901	-0.513683	0.342441	0.832476	primiparity;code_bep_n;m_bmiincl;m_hbincl;ga_days_incl;GWG;w_age;m_heightincl;m_muacincl	FALSE
HexCer.d18.1.23.0.	14–21d	Pre+Postnatal	-0.0172495	-0.138049	0.10355	0.0850486	0.777984	0.960748	primiparity;code_bep_n;m_bmiincl;m_hbincl;ga_days_incl;GWG;w_age;m_heightincl;m_muacincl	FALSE
HexCer.d18.1.24.0.	14–21d	Pre+Postnatal	-0.386361	-1.04279	0.270071	-0.794637	0.246347	0.764343	primiparity;code_bep_n;m_bmiincl;m_hbincl;ga_days_incl;GWG;w_age;m_heightincl;m_muacincl	FALSE
HexCer.d18.1.24.1.	14–21d	Pre+Postnatal	-0.269349	-1.41488	0.876179	-0.515768	0.642564	0.925455	primiparity;code_bep_n;m_bmiincl;ga_days_incl;GWG;w_age;m_heightincl;m_muacincl	FALSE
HexCer.d18.1.26.0.	14–21d	Pre+Postnatal	-0.000105525	-0.0114298	0.0112188	0.125907	0.985319	0.992154	primiparity;code_bep_n;m_bmiincl;m_hbincl;GWG;w_age;m_heightincl;m_muacincl	FALSE
HexCer.d18.1.26.1.	14–21d	Pre+Postnatal	0.0166353	-0.0239104	0.0571811	0.165805	0.418425	0.864097	primiparity;code_bep_n;m_bmiincl;m_hbincl;ga_days_incl;w_age;m_heightincl;m_muacincl	FALSE
HexCer.d18.2.16.0.	14–21d	Pre+Postnatal	0.000123736	-0.00200709	0.00225457	0.126453	0.908709	0.979314	primiparity;code_bep_n;m_bmiincl;m_hbincl;ga_days_incl;GWG;w_age;m_heightincl	FALSE
HexCer.d18.2.18.0.	14–21d	Pre+Postnatal	-0.00408243	-0.0108922	0.0027273	0.116429	0.237787	0.764343	primiparity;m_bmiincl;ga_days_incl;GWG;w_age	FALSE
HexCer.d18.2.20.0.	14–21d	Pre+Postnatal	-0.00709319	-0.0192437	0.00505735	0.109254	0.250237	0.764343	primiparity;code_bep_n;m_hbincl;ga_days_incl;GWG;w_age;m_muacincl	FALSE
HexCer.d18.2.22.0.	14–21d	Pre+Postnatal	-0.126542	-0.296121	0.0430368	-0.175424	0.142262	0.764343	primiparity;code_bep_n;m_bmiincl;m_hbincl;ga_days_incl;GWG;w_age;m_heightincl;m_muacincl	FALSE
HexCer.d18.2.23.0.	14–21d	Pre+Postnatal	-0.0116529	-0.0359244	0.0126186	0.0983867	0.343939	0.832476	primiparity;code_bep_n;m_hbincl;ga_days_incl;GWG;w_age;m_heightincl;m_muacincl	FALSE
HexCer.d18.2.24.0.	14–21d	Pre+Postnatal	-0.260325	-0.656779	0.136129	-0.494262	0.196189	0.764343	primiparity;code_bep_n;m_bmiincl;m_hbincl;ga_days_incl;GWG;w_age;m_heightincl;m_muacincl	FALSE
Ind.SO4	14–21d	Pre+Postnatal	0.0299767	-0.0188779	0.0788313	0.197601	0.227013	0.764343	primiparity;code_bep_n;m_bmiincl;m_hbincl;m_muacincl	FALSE
lysoPC.a.C14.0	14–21d	Pre+Postnatal	0.0410935	-0.422523	0.50471	0.224095	0.861056	0.979314	primiparity;code_bep_n;m_bmiincl;m_hbincl;ga_days_incl;GWG;w_age;m_heightincl;m_muacincl	FALSE
lysoPC.a.C16.0	14–21d	Pre+Postnatal	-0.292693	-0.769141	0.183755	-0.571404	0.226462	0.764343	primiparity;ga_days_incl;GWG;w_age	FALSE
lysoPC.a.C18.0	14–21d	Pre+Postnatal	-0.18764	-0.725132	0.349852	-0.321035	0.491012	0.886335	primiparity;m_bmiincl;m_hbincl;ga_days_incl;w_age;m_muacincl	FALSE
lysoPC.a.C18.1	14–21d	Pre+Postnatal	0.074364	-0.185418	0.334146	0.303387	0.572152	0.909852	primiparity;code_bep_n;m_bmiincl;m_hbincl;ga_days_incl;w_age;m_muacincl	FALSE
lysoPC.a.C18.2	14–21d	Pre+Postnatal	0.00620489	-0.78758	0.79999	0.140946	0.987684	0.992154	primiparity;code_bep_n;m_bmiincl;m_hbincl;GWG;w_age;m_heightincl;m_muacincl	FALSE
lysoPC.a.C20.4	14–21d	Pre+Postnatal	0.00283356	-0.0525988	0.0582659	0.132912	0.919594	0.979314	primiparity;code_bep_n;m_bmiincl;m_hbincl;ga_days_incl;GWG;w_age;m_heightincl;m_muacincl	FALSE
lysoPC.a.C26.1	14–21d	Pre+Postnatal	0.0142553	-0.0961394	0.12465	0.160133	0.798787	0.960748	code_bep_n;m_hbincl;ga_days_incl;GWG;w_age	FALSE
PC.aa.C28.1	14–21d	Pre+Postnatal	0.000561654	-0.140855	0.141978	0.127497	0.993742	0.994225	primiparity;code_bep_n;m_bmiincl;m_hbincl;ga_days_incl;GWG;w_age;m_heightincl;m_muacincl	FALSE
PC.aa.C30.0	14–21d	Pre+Postnatal	-0.359009	-1.55784	0.839818	-0.729451	0.554551	0.909852	primiparity;code_bep_n;m_bmiincl;ga_days_incl;GWG;w_age;m_heightincl;m_muacincl	FALSE
PC.aa.C32.0	14–21d	Pre+Postnatal	-0.635495	-2.36004	1.08905	-1.38839	0.467248	0.884398	primiparity;code_bep_n;m_bmiincl;m_hbincl;ga_days_incl;GWG;w_age;m_heightincl;m_muacincl	FALSE
PC.aa.C32.1	14–21d	Pre+Postnatal	-0.115597	-0.391249	0.160055	-0.149339	0.408212	0.864097	primiparity;code_bep_n;m_bmiincl;m_hbincl;ga_days_incl;GWG;w_age;m_heightincl;m_muacincl	FALSE
PC.aa.C32.2	14–21d	Pre+Postnatal	-0.025607	-0.159732	0.108518	0.0651306	0.706247	0.960673	primiparity;code_bep_n;m_bmiincl;ga_days_incl;GWG;w_age;m_heightincl;m_muacincl	FALSE
PC.aa.C32.3	14–21d	Pre+Postnatal	0.00593923	-0.0018926	0.0137711	0.140313	0.135981	0.764343	primiparity;ga_days_incl;w_age;m_muacincl	FALSE
PC.aa.C34.1	14–21d	Pre+Postnatal	-0.456208	-2.05961	1.14719	-0.961101	0.574432	0.909852	primiparity;code_bep_n;m_bmiincl;m_hbincl;ga_days_incl;GWG;w_age;m_heightincl;m_muacincl	FALSE
PC.aa.C34.2	14–21d	Pre+Postnatal	-0.60533	-1.98135	0.770694	-1.3165	0.385733	0.847849	primiparity;code_bep_n;ga_days_incl;GWG;w_age;m_heightincl;m_muacincl	FALSE
PC.aa.C34.3	14–21d	Pre+Postnatal	0.033017	-0.0186962	0.0847302	0.204846	0.208805	0.764343	primiparity;m_bmiincl;m_hbincl;ga_days_incl;w_age;m_muacincl	FALSE
PC.aa.C34.4	14–21d	Pre+Postnatal	-0.00868243	-0.0292732	0.0119084	0.105466	0.405668	0.864097	primiparity;code_bep_n;m_bmiincl;m_hbincl;ga_days_incl;GWG;w_age;m_heightincl	FALSE
PC.aa.C36.1	14–21d	Pre+Postnatal	-0.632819	-1.95686	0.691224	-1.38201	0.346086	0.832476	primiparity;code_bep_n;m_bmiincl;m_hbincl;ga_days_incl;GWG;w_age;m_heightincl;m_muacincl	FALSE
PC.aa.C36.2	14–21d	Pre+Postnatal	-0.931847	-4.64199	2.77829	-2.09467	0.620065	0.925455	primiparity;code_bep_n;m_bmiincl;m_hbincl;ga_days_incl;GWG;w_age;m_heightincl;m_muacincl	FALSE
PC.aa.C36.3	14–21d	Pre+Postnatal	0.0332158	-0.78987	0.856302	0.20532	0.936482	0.979314	primiparity;code_bep_n;m_bmiincl;m_hbincl;ga_days_incl;GWG;w_age;m_heightincl;m_muacincl	FALSE
PC.aa.C36.4	14–21d	Pre+Postnatal	-0.158218	-0.586059	0.269622	-0.250916	0.465673	0.884398	primiparity;code_bep_n;m_bmiincl;m_hbincl;ga_days_incl;GWG;w_age;m_heightincl;m_muacincl	FALSE
PC.aa.C36.5	14–21d	Pre+Postnatal	0.0265883	-0.00951293	0.0626896	0.189525	0.14752	0.764343	primiparity;m_bmiincl;ga_days_incl;w_age;m_muacincl	FALSE
PC.aa.C36.6	14–21d	Pre+Postnatal	-0.00318722	-0.013268	0.00689355	0.118563	0.532718	0.909852	primiparity;code_bep_n;m_bmiincl;m_hbincl;ga_days_incl;GWG;w_age;m_muacincl	FALSE
PC.aa.C38.0	14–21d	Pre+Postnatal	0.0240171	-0.0662683	0.114303	0.183397	0.599613	0.921204	primiparity;m_hbincl;GWG;w_age;m_muacincl	FALSE
PC.aa.C38.3	14–21d	Pre+Postnatal	-0.026915	-0.336434	0.282604	0.0620132	0.863662	0.979314	primiparity;code_bep_n;m_bmiincl;m_hbincl;ga_days_incl;GWG;w_age;m_heightincl;m_muacincl	FALSE
PC.aa.C38.4	14–21d	Pre+Postnatal	-0.136555	-0.527025	0.253916	-0.199286	0.490206	0.886335	primiparity;code_bep_n;m_bmiincl;m_hbincl;ga_days_incl;GWG;w_age;m_heightincl;m_muacincl	FALSE
PC.aa.C38.5	14–21d	Pre+Postnatal	-0.00130637	-0.132505	0.129893	0.123045	0.984314	0.992154	primiparity;m_hbincl;ga_days_incl;GWG;w_age;m_muacincl	FALSE
PC.aa.C38.6	14–21d	Pre+Postnatal	-0.0287476	-0.111368	0.0538724	0.0576456	0.492398	0.886335	primiparity;code_bep_n;m_bmiincl;m_hbincl;ga_days_incl;GWG;w_age;m_heightincl;m_muacincl	FALSE
PC.aa.C40.3	14–21d	Pre+Postnatal	-0.00269064	-0.0268998	0.0215185	0.119746	0.82629	0.970563	primiparity;code_bep_n;m_bmiincl;m_hbincl;ga_days_incl;GWG;w_age;m_heightincl;m_muacincl	FALSE
PC.aa.C40.4	14–21d	Pre+Postnatal	-0.0188949	-0.0640488	0.026259	0.0811272	0.40922	0.864097	primiparity;code_bep_n;m_bmiincl;m_hbincl;ga_days_incl;GWG;w_age;m_heightincl;m_muacincl	FALSE
PC.aa.C40.5	14–21d	Pre+Postnatal	-0.012586	-0.0459976	0.0208256	0.0961628	0.457422	0.884398	primiparity;m_bmiincl;m_hbincl;ga_days_incl;GWG;w_age;m_heightincl;m_muacincl	FALSE
PC.aa.C40.6	14–21d	Pre+Postnatal	-0.0241292	-0.12162	0.073362	0.0686524	0.625167	0.925455	primiparity;code_bep_n;m_bmiincl;m_hbincl;ga_days_incl;GWG;w_age;m_heightincl;m_muacincl	FALSE
PC.aa.C42.4	14–21d	Pre+Postnatal	0.000423897	-0.00568445	0.00653224	0.127169	0.890999	0.979314	primiparity;code_bep_n;m_bmiincl;m_hbincl;ga_days_incl;GWG;w_age;m_heightincl;m_muacincl	FALSE
PC.ae.C30.1	14–21d	Pre+Postnatal	0.0226367	-0.16086	0.206133	0.180107	0.80757	0.960748	primiparity;code_bep_n;m_bmiincl;m_hbincl;w_age;m_heightincl;m_muacincl	FALSE
PC.ae.C30.2	14–21d	Pre+Postnatal	-0.00110002	-0.00709692	0.00489688	0.123537	0.717256	0.960673	primiparity;code_bep_n;m_bmiincl;m_hbincl;ga_days_incl;GWG;w_age;m_heightincl	FALSE
PC.ae.C32.1	14–21d	Pre+Postnatal	-0.0187499	-0.0745096	0.0370098	0.0814726	0.507021	0.896882	primiparity;code_bep_n;m_bmiincl;m_hbincl;ga_days_incl;GWG;w_age;m_heightincl;m_muacincl	FALSE
PC.ae.C34.0	14–21d	Pre+Postnatal	-0.0190273	-0.0736521	0.0355975	0.0808116	0.491929	0.886335	primiparity;code_bep_n;m_bmiincl;m_hbincl;ga_days_incl;GWG;w_age;m_heightincl;m_muacincl	FALSE
PC.ae.C34.1	14–21d	Pre+Postnatal	-0.00745609	-0.132517	0.117605	0.108389	0.906289	0.979314	primiparity;code_bep_n;m_hbincl;ga_days_incl;GWG;w_age;m_muacincl	FALSE
PC.ae.C34.2	14–21d	Pre+Postnatal	-0.026107	-0.116946	0.0647324	0.0639389	0.57058	0.909852	primiparity;code_bep_n;m_bmiincl;m_hbincl;ga_days_incl;GWG;w_age;m_heightincl;m_muacincl	FALSE
PC.ae.C34.3	14–21d	Pre+Postnatal	-0.0642959	-0.17499	0.046398	-0.0270749	0.252594	0.764343	primiparity;code_bep_n;m_bmiincl;m_hbincl;ga_days_incl;w_age;m_heightincl;m_muacincl	FALSE	TRUE	FALSE	0.762238
PC.ae.C34.3	14–21d	Pre+Postnatal	-0.0642959	-0.17499	0.046398	-0.0270749	0.252594	0.764343	primiparity;code_bep_n;m_bmiincl;m_hbincl;ga_days_incl;w_age;m_heightincl;m_muacincl	FALSE	TRUE	FALSE	0.677686
PC.ae.C36.1	14–21d	Pre+Postnatal	-0.0100332	-0.0728978	0.0528314	0.102247	0.752672	0.960748	primiparity;code_bep_n;m_bmiincl;m_hbincl;ga_days_incl;GWG;w_age;m_heightincl;m_muacincl	FALSE
PC.ae.C36.2	14–21d	Pre+Postnatal	-0.012169	-0.11122	0.0868816	0.0971567	0.808323	0.960748	primiparity;code_bep_n;m_bmiincl;m_hbincl;ga_days_incl;GWG;w_age;m_heightincl;m_muacincl	FALSE
PC.ae.C36.3	14–21d	Pre+Postnatal	-0.0411826	-0.131802	0.0494365	0.0280099	0.370222	0.842967	primiparity;code_bep_n;m_bmiincl;m_hbincl;ga_days_incl;GWG;w_age;m_heightincl;m_muacincl	FALSE
PC.ae.C36.4	14–21d	Pre+Postnatal	-0.0267344	-0.150871	0.0974017	0.0624437	0.670726	0.947031	primiparity;code_bep_n;m_bmiincl;m_hbincl;ga_days_incl;GWG;w_age;m_heightincl;m_muacincl	FALSE	TRUE	FALSE	0.762238
PC.ae.C36.4	14–21d	Pre+Postnatal	-0.0267344	-0.150871	0.0974017	0.0624437	0.670726	0.947031	primiparity;code_bep_n;m_bmiincl;m_hbincl;ga_days_incl;GWG;w_age;m_heightincl;m_muacincl	FALSE	TRUE	FALSE	0.677686
PC.ae.C36.5	14–21d	Pre+Postnatal	-0.0190962	-0.135093	0.0969004	0.0806475	0.745151	0.960748	primiparity;m_bmiincl;m_hbincl;ga_days_incl;GWG;w_age;m_heightincl;m_muacincl	FALSE
PC.ae.C38.2	14–21d	Pre+Postnatal	-0.000579322	-0.0206721	0.0195135	0.124778	0.954597	0.987975	primiparity;m_bmiincl;m_hbincl;ga_days_incl;GWG;w_age;m_muacincl	FALSE
PC.ae.C38.3	14–21d	Pre+Postnatal	-0.0107677	-0.0330547	0.0115194	0.100496	0.340913	0.832476	primiparity;code_bep_n;m_bmiincl;m_hbincl;ga_days_incl;GWG;w_age;m_muacincl	FALSE
PC.ae.C38.4	14–21d	Pre+Postnatal	-0.0306024	-0.136712	0.0755067	0.0532251	0.569231	0.909852	primiparity;code_bep_n;m_bmiincl;m_hbincl;ga_days_incl;GWG;w_age;m_heightincl;m_muacincl	FALSE
PC.ae.C38.5	14–21d	Pre+Postnatal	-0.0295861	-0.162665	0.103492	0.0556473	0.660787	0.940351	primiparity;code_bep_n;m_bmiincl;m_hbincl;GWG;w_age;m_muacincl	FALSE
PC.ae.C38.6	14–21d	Pre+Postnatal	0.00413978	-0.0264188	0.0346984	0.136025	0.789126	0.960748	primiparity;m_bmiincl;ga_days_incl;GWG;w_age	FALSE
PC.ae.C40.2	14–21d	Pre+Postnatal	0.003386	-0.0165805	0.0233525	0.134228	0.737773	0.960748	primiparity;m_bmiincl;m_hbincl;ga_days_incl;GWG;w_age;m_muacincl	FALSE
PC.ae.C40.3	14–21d	Pre+Postnatal	-0.00116672	-0.0118159	0.00948246	0.123378	0.828722	0.970852	primiparity;code_bep_n;m_bmiincl;m_hbincl;ga_days_incl;GWG;w_age;m_heightincl;m_muacincl	FALSE
PC.ae.C40.4	14–21d	Pre+Postnatal	-0.0147207	-0.0547771	0.0253358	0.0910754	0.468457	0.884398	primiparity;code_bep_n;m_bmiincl;m_hbincl;ga_days_incl;GWG;w_age;m_heightincl;m_muacincl	FALSE
PC.ae.C40.5	14–21d	Pre+Postnatal	0.00222366	-0.0831692	0.0876166	0.131458	0.95899	0.990213	primiparity;code_bep_n;m_bmiincl;m_hbincl;ga_days_incl;w_age;m_heightincl;m_muacincl	FALSE
PC.ae.C40.6	14–21d	Pre+Postnatal	0.013878	-0.0765091	0.104265	0.159233	0.76177	0.960748	primiparity;code_bep_n;m_bmiincl;m_hbincl;ga_days_incl;GWG;w_age;m_heightincl;m_muacincl	FALSE
PC.ae.C42.3	14–21d	Pre+Postnatal	-0.00391403	-0.014857	0.00702897	0.11683	0.480406	0.885427	primiparity;code_bep_n;m_bmiincl;m_hbincl;ga_days_incl;GWG;w_age;m_heightincl;m_muacincl	FALSE
SM..OH..C14.1	14–21d	Pre+Postnatal	-0.00702022	-0.0241047	0.0100643	0.109428	0.417761	0.864097	primiparity;code_bep_n;ga_days_incl;GWG;w_age;m_muacincl	FALSE
SM..OH..C16.1	14–21d	Pre+Postnatal	-0.00818516	-0.0300088	0.0136384	0.106651	0.459419	0.884398	primiparity;m_bmiincl;m_hbincl;ga_days_incl;w_age;m_muacincl	FALSE
SM..OH..C22.1	14–21d	Pre+Postnatal	-0.0759776	-0.250222	0.0982668	-0.0549155	0.389938	0.850699	primiparity;m_bmiincl;m_hbincl;GWG;w_age	FALSE
SM..OH..C22.2	14–21d	Pre+Postnatal	0.00033273	-0.0337477	0.0344132	0.126951	0.984618	0.992154	primiparity;code_bep_n;m_bmiincl;m_hbincl;ga_days_incl;GWG;w_age;m_muacincl	FALSE
SM..OH..C24.1	14–21d	Pre+Postnatal	-0.0204261	-0.0573262	0.0164739	0.0774778	0.275461	0.764343	primiparity;m_bmiincl;m_hbincl;ga_days_incl;GWG;w_age;m_muacincl	FALSE
SM.C16.0	14–21d	Pre+Postnatal	-0.187978	-0.96708	0.591124	-0.321841	0.633888	0.925455	primiparity;code_bep_n;m_bmiincl;m_hbincl;ga_days_incl;GWG;w_age;m_heightincl;m_muacincl	FALSE
SM.C16.1	14–21d	Pre+Postnatal	-0.00745236	-0.0434772	0.0285724	0.108398	0.683004	0.956636	primiparity;code_bep_n;m_bmiincl;m_hbincl;ga_days_incl;GWG;w_age;m_muacincl	FALSE
SM.C18.0	14–21d	Pre+Postnatal	-0.334374	-0.852591	0.183844	-0.670739	0.20406	0.764343	primiparity;m_hbincl;ga_days_incl;w_age;m_muacincl	FALSE
SM.C18.1	14–21d	Pre+Postnatal	-0.0233489	-0.0632637	0.0165659	0.0705122	0.249293	0.764343	primiparity;m_bmiincl;m_hbincl;w_age;m_muacincl	FALSE
SM.C20.2	14–21d	Pre+Postnatal	-0.00134347	-0.00661848	0.00393154	0.122957	0.615209	0.925455	m_bmiincl;m_hbincl;ga_days_incl;GWG;w_age;m_muacincl	FALSE
SM.C22.3	14–21d	Pre+Postnatal	-0.00546784	-0.0173532	0.00641752	0.113127	0.364428	0.838373	primiparity;m_hbincl;ga_days_incl;GWG;w_age;m_muacincl	FALSE
SM.C24.0	14–21d	Pre+Postnatal	-1.30291	-2.86979	0.263961	-2.97901	0.102354	0.757419	primiparity;code_bep_n;m_bmiincl;m_hbincl;ga_days_incl;GWG;w_age;m_heightincl;m_muacincl	FALSE
SM.C24.1	14–21d	Pre+Postnatal	0.300054	-0.728236	1.32834	0.841264	0.564762	0.909852	primiparity;m_hbincl;ga_days_incl;w_age;m_muacincl	FALSE
SM.C26.0	14–21d	Pre+Postnatal	-0.00511604	-0.0382244	0.0279923	0.113966	0.760289	0.960748	primiparity;code_bep_n;m_bmiincl;m_hbincl;ga_days_incl;GWG;w_age;m_heightincl;m_muacincl	FALSE
SM.C26.1	14–21d	Pre+Postnatal	0.0174852	-0.0192999	0.0542703	0.16783	0.34874	0.832476	primiparity;code_bep_n;m_bmiincl;m_hbincl;ga_days_incl;w_age;m_heightincl;m_muacincl	FALSE
TG.14.0_32.2.	14–21d	Pre+Postnatal	-24.7772	-91.7872	42.2327	-4	0.465825	0.884398	m_hbincl;w_age;m_heightincl;m_muacincl	FALSE
TG.14.0_34.0.	14–21d	Pre+Postnatal	-5.54968	-12.7245	1.62516	-4	0.128373	0.764343	primiparity;m_bmiincl;m_hbincl;ga_days_incl;w_age;m_heightincl;m_muacincl	FALSE
TG.14.0_34.1.	14–21d	Pre+Postnatal	-39.1751	-95.3215	16.9712	-4	0.169813	0.764343	primiparity;code_bep_n;m_bmiincl;m_hbincl;ga_days_incl;GWG;w_age;m_heightincl;m_muacincl	FALSE
TG.14.0_34.2.	14–21d	Pre+Postnatal	-33.6302	-89.2469	21.9865	-4	0.233812	0.764343	m_hbincl;w_age;m_muacincl	FALSE
TG.14.0_34.3.	14–21d	Pre+Postnatal	1.26126	-7.66796	10.1905	3.13205	0.780333	0.960748	m_bmiincl;m_hbincl;ga_days_incl;GWG;w_age;m_heightincl;m_muacincl	FALSE
TG.14.0_35.1.	14–21d	Pre+Postnatal	-0.717467	-1.99324	0.558308	-1.58375	0.267953	0.764343	m_bmiincl;m_hbincl;ga_days_incl;w_age;m_muacincl	FALSE
TG.14.0_35.2.	14–21d	Pre+Postnatal	-0.50103	-1.80022	0.798159	-1.06792	0.446935	0.884398	code_bep_n;m_hbincl;w_age;m_muacincl	FALSE
TG.14.0_36.1.	14–21d	Pre+Postnatal	-13.7357	-37.5517	10.0802	-4	0.255922	0.764343	primiparity;code_bep_n;m_bmiincl;m_hbincl;ga_days_incl;GWG;w_age;m_heightincl;m_muacincl	FALSE
TG.14.0_36.2.	14–21d	Pre+Postnatal	-13.1839	-61.9012	35.5334	-4	0.593255	0.918141	primiparity;code_bep_n;m_bmiincl;m_hbincl;ga_days_incl;GWG;w_age;m_heightincl;m_muacincl	FALSE
TG.14.0_36.3.	14–21d	Pre+Postnatal	-7.65231	-53.5501	38.2454	-4	0.742019	0.960748	primiparity;code_bep_n;m_bmiincl;m_hbincl;ga_days_incl;GWG;w_age;m_heightincl;m_muacincl	FALSE	TRUE	FALSE	0.677686
TG.14.0_36.4.	14–21d	Pre+Postnatal	5.79196	-21.201	32.7849	4	0.67188	0.947031	primiparity;code_bep_n;m_bmiincl;m_hbincl;ga_days_incl;GWG;w_age;m_muacincl	FALSE
TG.14.0_38.4.	14–21d	Pre+Postnatal	-1.51841	-6.33445	3.29763	-3.4926	0.533844	0.909852	primiparity;code_bep_n;m_bmiincl;m_hbincl;ga_days_incl;GWG;w_age;m_heightincl;m_muacincl	FALSE
TG.14.0_38.5.	14–21d	Pre+Postnatal	1.22471	-2.29811	4.74754	3.04496	0.492877	0.886335	code_bep_n;m_bmiincl;m_hbincl;w_age	FALSE
TG.16.0_28.1.	14–21d	Pre+Postnatal	-9.19422	-41.5905	23.202	-4	0.5754	0.909852	primiparity;code_bep_n;m_bmiincl;m_hbincl;ga_days_incl;GWG;w_age;m_heightincl;m_muacincl	FALSE
TG.16.0_28.2.	14–21d	Pre+Postnatal	-0.523517	-23.1429	22.0958	-1.12152	0.963545	0.99031	primiparity;code_bep_n;m_bmiincl;m_hbincl;ga_days_incl;GWG;w_age;m_heightincl;m_muacincl	FALSE
TG.16.0_30.2.	14–21d	Pre+Postnatal	-17.1909	-77.4527	43.0708	-4	0.573492	0.909852	code_bep_n;m_bmiincl;m_hbincl;ga_days_incl;GWG;w_age	FALSE
TG.16.0_32.0.	14–21d	Pre+Postnatal	-4.38035	-19.3674	10.6067	-4	0.564108	0.909852	primiparity;code_bep_n;m_bmiincl;m_hbincl;w_age;m_heightincl;m_muacincl	FALSE
TG.16.0_32.1.	14–21d	Pre+Postnatal	-38.2189	-88.4078	11.97	-4	0.134337	0.764343	primiparity;code_bep_n;m_bmiincl;m_hbincl;ga_days_incl;GWG;w_age;m_heightincl;m_muacincl	FALSE
TG.16.0_32.2.	14–21d	Pre+Postnatal	-27.7232	-75.8332	20.3868	-4	0.256387	0.764343	m_bmiincl;m_hbincl;ga_days_incl;w_age;m_muacincl	FALSE	TRUE	FALSE	0.85
TG.16.0_32.3.	14–21d	Pre+Postnatal	3.17851	-1.50055	7.85758	4	0.181353	0.764343	m_hbincl;w_age;m_muacincl	FALSE
TG.16.0_33.1.	14–21d	Pre+Postnatal	-0.983024	-2.76304	0.796993	-2.21664	0.276622	0.764343	m_bmiincl;m_hbincl;ga_days_incl;w_age;m_muacincl	FALSE
TG.16.0_33.2.	14–21d	Pre+Postnatal	-0.318777	-1.37848	0.740923	-0.633569	0.552768	0.909852	primiparity;code_bep_n;m_bmiincl;m_hbincl;ga_days_incl;w_age;m_heightincl;m_muacincl	FALSE
TG.16.0_34.0.	14–21d	Pre+Postnatal	2.67662	-11.645	16.9982	4	0.712157	0.960673	primiparity;code_bep_n;m_bmiincl;m_hbincl;ga_days_incl;w_age;m_heightincl;m_muacincl	FALSE
TG.16.0_34.1.	14–21d	Pre+Postnatal	-39.0906	-123.647	45.4659	-4	0.362046	0.838373	primiparity;code_bep_n;m_bmiincl;m_hbincl;ga_days_incl;GWG;w_age;m_heightincl;m_muacincl	FALSE
TG.16.0_34.2.	14–21d	Pre+Postnatal	-35.0093	-99.3985	29.3799	-4	0.284047	0.764343	primiparity;code_bep_n;m_bmiincl;m_hbincl;ga_days_incl;GWG;w_age;m_muacincl	FALSE
TG.16.0_34.3.	14–21d	Pre+Postnatal	-2.64694	-13.2969	8.00298	-4	0.623736	0.925455	code_bep_n;m_bmiincl;m_hbincl;ga_days_incl;GWG;w_age;m_heightincl;m_muacincl	FALSE
TG.16.0_34.4.	14–21d	Pre+Postnatal	0.319297	-1.41486	2.05345	0.887124	0.716222	0.960673	primiparity;code_bep_n;m_bmiincl;m_hbincl;ga_days_incl;GWG;w_age;m_heightincl;m_muacincl	FALSE
TG.16.0_35.1.	14–21d	Pre+Postnatal	-0.500487	-2.51499	1.51402	-1.06663	0.623893	0.925455	primiparity;code_bep_n;m_bmiincl;ga_days_incl;GWG;w_age;m_heightincl	FALSE
TG.16.0_35.2.	14–21d	Pre+Postnatal	-0.683453	-2.7022	1.33529	-1.50268	0.504182	0.895427	primiparity;code_bep_n;m_bmiincl;m_hbincl;ga_days_incl;w_age;m_heightincl	FALSE
TG.16.0_35.3.	14–21d	Pre+Postnatal	-0.0835839	-1.0883	0.921128	-0.073043	0.869511	0.979314	primiparity;code_bep_n;m_bmiincl;m_hbincl;ga_days_incl;GWG;w_age;m_heightincl;m_muacincl	FALSE
TG.16.0_36.2.	14–21d	Pre+Postnatal	6.96187	-107.7	121.624	4	0.904563	0.979314	primiparity;code_bep_n;m_bmiincl;m_hbincl;ga_days_incl;GWG;w_age;m_heightincl;m_muacincl	FALSE
TG.16.0_36.3.	14–21d	Pre+Postnatal	-2.20603	-95.9219	91.5098	-4	0.962925	0.99031	primiparity;code_bep_n;m_bmiincl;m_hbincl;ga_days_incl;GWG;w_age;m_muacincl	FALSE
TG.16.0_36.4.	14–21d	Pre+Postnatal	12.2475	-39.8263	64.3212	4	0.642474	0.925455	code_bep_n;m_bmiincl;m_hbincl;ga_days_incl;GWG;w_age;m_heightincl;m_muacincl	FALSE
TG.16.0_36.5.	14–21d	Pre+Postnatal	7.01224	3.43433	10.5901	4	0.000164667	0.00522231		TRUE
TG.16.0_36.6.	14–21d	Pre+Postnatal	1.15676	-0.24403	2.55756	2.88302	0.104722	0.762242	primiparity;code_bep_n;m_bmiincl;m_hbincl;ga_days_incl;GWG;w_age;m_heightincl;m_muacincl	FALSE
TG.16.0_37.3.	14–21d	Pre+Postnatal	0.0734373	-1.07076	1.21764	0.301178	0.899149	0.979314	code_bep_n;m_bmiincl;m_hbincl;ga_days_incl;GWG;w_age;m_heightincl;m_muacincl	FALSE	TRUE	FALSE	0.762238
TG.16.0_38.1.	14–21d	Pre+Postnatal	0.118152	-2.41084	2.64714	0.407744	0.926496	0.979314	primiparity;m_bmiincl;m_hbincl;ga_days_incl;GWG;w_age;m_muacincl	FALSE
TG.16.0_38.2.	14–21d	Pre+Postnatal	-0.681327	-4.67393	3.31127	-1.49762	0.736176	0.960748	primiparity;code_bep_n;m_bmiincl;m_hbincl;ga_days_incl;GWG;w_age;m_heightincl;m_muacincl	FALSE
TG.16.0_38.3.	14–21d	Pre+Postnatal	-2.27906	-7.5781	3.01999	-4	0.396357	0.858451	primiparity;m_bmiincl;m_hbincl;ga_days_incl;GWG;w_age;m_heightincl;m_muacincl	FALSE
TG.16.0_38.4.	14–21d	Pre+Postnatal	-1.37921	-7.26585	4.50743	-3.16085	0.643727	0.925455	primiparity;code_bep_n;m_bmiincl;m_hbincl;ga_days_incl;GWG;w_age;m_heightincl;m_muacincl	FALSE
TG.16.0_38.5.	14–21d	Pre+Postnatal	0.854304	-2.90116	4.60977	2.16218	0.653408	0.935849	code_bep_n;m_bmiincl;m_hbincl;ga_days_incl;GWG;w_age;m_heightincl;m_muacincl	FALSE	TRUE	FALSE	0.85
TG.16.0_38.6.	14–21d	Pre+Postnatal	1.37544	-1.0338	3.78468	3.40417	0.260785	0.764343	primiparity;code_bep_n;m_bmiincl;m_hbincl;ga_days_incl;m_heightincl;m_muacincl	FALSE
TG.16.0_38.7.	14–21d	Pre+Postnatal	0.566066	-0.156133	1.28827	1.47524	0.123395	0.764343	primiparity;code_bep_n;m_bmiincl;m_hbincl;ga_days_incl;GWG;w_age;m_heightincl;m_muacincl	FALSE
TG.16.0_40.6.	14–21d	Pre+Postnatal	-0.0221206	-1.9423	1.89805	0.0734394	0.98185	0.992154	primiparity;code_bep_n;m_bmiincl;m_hbincl;ga_days_incl;GWG;w_age;m_heightincl;m_muacincl	FALSE
TG.16.0_40.7.	14–21d	Pre+Postnatal	1.00655	-1.71772	3.73082	2.52503	0.466072	0.884398	primiparity;code_bep_n;m_bmiincl;m_hbincl;ga_days_incl;GWG;w_age;m_heightincl;m_muacincl	FALSE
TG.16.0_40.8.	14–21d	Pre+Postnatal	0.573226	-0.897034	2.04349	1.4923	0.441865	0.884398	primiparity;code_bep_n;m_bmiincl;m_hbincl;ga_days_incl;GWG;w_age;m_heightincl;m_muacincl	FALSE
TG.16.1_28.0.	14–21d	Pre+Postnatal	-12.4554	-25.6896	0.77888	-4	0.0648736	0.61411	m_hbincl;w_age;m_muacincl	FALSE
TG.16.1_30.1.	14–21d	Pre+Postnatal	-5.86805	-15.5298	3.79366	-4	0.231697	0.764343	primiparity;m_bmiincl;m_hbincl;ga_days_incl;w_age;m_heightincl;m_muacincl	FALSE
TG.16.1_32.0.	14–21d	Pre+Postnatal	-7.7985	-13.3895	-2.20752	-4	0.00661388	0.112945	w_age;m_muacincl	TRUE	FALSE	TRUE	0.762238
TG.16.1_32.1.	14–21d	Pre+Postnatal	-9.40636	-19.4988	0.686086	-4	0.0674761	0.61411	primiparity;m_bmiincl;ga_days_incl;w_age;m_heightincl;m_muacincl	FALSE
TG.16.1_32.2.	14–21d	Pre+Postnatal	-3.71011	-9.35882	1.9386	-4	0.196144	0.764343	m_hbincl;w_age;m_muacincl	FALSE	TRUE	FALSE	0.762238
TG.16.1_33.1.	14–21d	Pre+Postnatal	-0.289693	-0.661102	0.0817159	-0.564254	0.125261	0.764343	m_hbincl;w_age;m_muacincl	FALSE
TG.16.1_34.0.	14–21d	Pre+Postnatal	-3.98048	-7.43002	-0.530946	-4	0.0240552	0.323652	m_bmiincl;m_hbincl;w_age;m_muacincl	TRUE
TG.16.1_34.1.	14–21d	Pre+Postnatal	-17.9182	-37.2621	1.42564	-4	0.0691565	0.61411	primiparity;m_bmiincl;ga_days_incl;w_age;m_muacincl	FALSE
TG.16.1_34.2.	14–21d	Pre+Postnatal	-10.7667	-24.236	2.70271	-4	0.11623	0.764343	m_hbincl;ga_days_incl;w_age;m_muacincl	FALSE	TRUE	FALSE	0.762238
TG.16.1_34.3.	14–21d	Pre+Postnatal	-0.738041	-2.52116	1.04508	-1.63278	0.414387	0.864097	code_bep_n;m_bmiincl;m_hbincl;ga_days_incl;w_age;m_muacincl	FALSE
TG.16.1_36.1.	14–21d	Pre+Postnatal	-2.95612	-7.41299	1.50076	-4	0.191764	0.764343	code_bep_n;m_bmiincl;m_hbincl;ga_days_incl;w_age;m_heightincl;m_muacincl	FALSE
TG.16.1_36.2.	14–21d	Pre+Postnatal	-3.76921	-14.0634	6.52493	-4	0.470085	0.884398	primiparity;code_bep_n;m_bmiincl;m_hbincl;ga_days_incl;GWG;w_age;m_heightincl;m_muacincl	FALSE
TG.16.1_36.3.	14–21d	Pre+Postnatal	-2.98627	-12.1583	6.1858	-4	0.520607	0.909852	primiparity;m_bmiincl;m_hbincl;ga_days_incl;GWG;w_age;m_muacincl	FALSE	TRUE	FALSE	0.677686
TG.16.1_36.4.	14–21d	Pre+Postnatal	-0.16849	-4.17598	3.839	-0.275396	0.93383	0.979314	primiparity;code_bep_n;m_bmiincl;m_hbincl;ga_days_incl;GWG;w_age;m_heightincl;m_muacincl	FALSE	TRUE	FALSE	0.677686
TG.16.1_36.5.	14–21d	Pre+Postnatal	0.483844	0.0965827	0.871106	1.27928	0.0147219	0.217884	m_hbincl	TRUE
TG.16.1_38.3.	14–21d	Pre+Postnatal	-0.279475	-0.885073	0.326123	-0.539902	0.362913	0.838373	primiparity;m_bmiincl;ga_days_incl;GWG;w_age;m_heightincl;m_muacincl	FALSE
TG.16.1_38.4.	14–21d	Pre+Postnatal	-0.222849	-0.872164	0.426465	-0.404948	0.498327	0.888582	primiparity;code_bep_n;m_bmiincl;m_hbincl;ga_days_incl;GWG;w_age;m_muacincl	FALSE	TRUE	FALSE	0.762238
TG.16.1_38.5.	14–21d	Pre+Postnatal	0.0197145	-0.404514	0.443943	0.173143	0.926884	0.979314	primiparity;code_bep_n;m_bmiincl;m_hbincl;ga_days_incl;w_age;m_heightincl;m_muacincl	FALSE	TRUE	FALSE	0.677686
TG.17.0_32.1.	14–21d	Pre+Postnatal	-0.580247	-1.75199	0.591498	-1.25672	0.329036	0.832476	primiparity;m_bmiincl;m_hbincl;ga_days_incl;w_age;m_heightincl;m_muacincl	FALSE
TG.17.0_34.1.	14–21d	Pre+Postnatal	-0.448392	-2.3221	1.42532	-0.942473	0.636656	0.925455	primiparity;code_bep_n;m_bmiincl;m_hbincl;ga_days_incl;GWG;w_age;m_heightincl;m_muacincl	FALSE	TRUE	FALSE	0.677686
TG.17.0_34.2.	14–21d	Pre+Postnatal	-0.428105	-2.13274	1.27653	-0.894125	0.620112	0.925455	primiparity;code_bep_n;m_bmiincl;m_hbincl;ga_days_incl;w_age;m_heightincl;m_muacincl	FALSE	TRUE	FALSE	0.762238
TG.17.0_34.3.	14–21d	Pre+Postnatal	0.0154071	-0.227671	0.258485	0.162877	0.900392	0.979314	primiparity;code_bep_n;m_bmiincl;m_hbincl;ga_days_incl;GWG;w_age;m_heightincl;m_muacincl	FALSE	FALSE	TRUE	0.762238
TG.17.0_36.3.	14–21d	Pre+Postnatal	0.199833	-1.48383	1.8835	0.602411	0.814744	0.961116	m_hbincl;GWG;w_age;m_muacincl	FALSE
TG.17.0_36.4.	14–21d	Pre+Postnatal	0.235691	-0.51924	0.990622	0.68787	0.537862	0.909852	primiparity;code_bep_n;m_bmiincl;m_hbincl;ga_days_incl;w_age;m_heightincl;m_muacincl	FALSE
TG.17.1_32.1.	14–21d	Pre+Postnatal	-0.237435	-1.1233	0.648427	-0.43971	0.596797	0.920062	primiparity;code_bep_n;m_bmiincl;m_hbincl;ga_days_incl;GWG;w_age;m_heightincl;m_muacincl	FALSE	TRUE	FALSE	0.677686
TG.17.1_34.1.	14–21d	Pre+Postnatal	-0.585701	-2.22388	1.05248	-1.26972	0.480603	0.885427	code_bep_n;m_bmiincl;m_hbincl;ga_days_incl;GWG;w_age;m_heightincl;m_muacincl	FALSE
TG.17.1_34.2.	14–21d	Pre+Postnatal	-0.270575	-1.6096	1.06845	-0.518691	0.689967	0.960673	primiparity;code_bep_n;m_bmiincl;m_hbincl;ga_days_incl;w_age;m_heightincl;m_muacincl	FALSE
TG.17.1_34.3.	14–21d	Pre+Postnatal	0.0264429	-0.156846	0.209732	0.189179	0.775753	0.960748	primiparity;code_bep_n;m_bmiincl;m_hbincl;ga_days_incl;GWG;w_age;m_heightincl;m_muacincl	FALSE
TG.17.1_36.3.	14–21d	Pre+Postnatal	0.265058	-0.838794	1.36891	0.757859	0.63553	0.925455	primiparity;code_bep_n;m_bmiincl;m_hbincl;ga_days_incl;w_age;m_heightincl;m_muacincl	FALSE	TRUE	FALSE	0.677686
TG.17.1_36.4.	14–21d	Pre+Postnatal	0.239335	-0.30445	0.78312	0.696555	0.385479	0.847849	primiparity;code_bep_n;m_bmiincl;m_hbincl;ga_days_incl;w_age;m_heightincl;m_muacincl	FALSE	TRUE	FALSE	0.677686
TG.17.1_36.5.	14–21d	Pre+Postnatal	0.0832078	0.030089	0.136327	0.324464	0.00238028	0.0459498	primiparity;code_bep_n;m_bmiincl;m_hbincl;ga_days_incl;m_heightincl;m_muacincl	TRUE
TG.17.1_38.5.	14–21d	Pre+Postnatal	0.00284757	-0.00358934	0.00928448	0.132945	0.383035	0.847849	primiparity;code_bep_n;m_bmiincl;m_hbincl;ga_days_incl;GWG;w_age;m_heightincl;m_muacincl	FALSE
TG.17.2_34.2.	14–21d	Pre+Postnatal	0.131875	-0.22597	0.48972	0.440449	0.467218	0.884398	primiparity;code_bep_n;m_bmiincl;m_hbincl;ga_days_incl;GWG;w_age;m_heightincl;m_muacincl	FALSE
TG.17.2_34.3.	14–21d	Pre+Postnatal	0.0239544	-0.0425528	0.0904616	0.183248	0.477368	0.885427	primiparity;code_bep_n;m_bmiincl;m_hbincl;ga_days_incl;GWG;m_heightincl;m_muacincl	FALSE
TG.17.2_36.2.	14–21d	Pre+Postnatal	0.137916	-0.0385875	0.314419	0.454847	0.12456	0.764343	primiparity;code_bep_n;m_bmiincl;m_hbincl;ga_days_incl;w_age;m_heightincl;m_muacincl	FALSE
TG.17.2_36.3.	14–21d	Pre+Postnatal	0.079313	-0.0277656	0.186392	0.315181	0.145231	0.764343	primiparity;code_bep_n;m_bmiincl;m_hbincl;ga_days_incl;m_heightincl;m_muacincl	FALSE
TG.17.2_36.4.	14–21d	Pre+Postnatal	0.134481	-0.0586476	0.327609	0.44666	0.170681	0.764343	primiparity;code_bep_n;m_bmiincl;m_hbincl;ga_days_incl;GWG;m_heightincl;m_muacincl	FALSE
TG.17.2_38.5.	14–21d	Pre+Postnatal	0.00817378	-0.0242952	0.0406428	0.145639	0.619335	0.925455	code_bep_n;ga_days_incl;GWG;w_age;m_heightincl	FALSE
TG.17.2_38.6.	14–21d	Pre+Postnatal	0.0246396	-0.00748103	0.0567602	0.184881	0.131551	0.764343	code_bep_n;m_bmiincl;GWG;w_age;m_heightincl;m_muacincl	FALSE
TG.18.0_30.0.	14–21d	Pre+Postnatal	-5.8195	-17.7968	6.15778	-4	0.338189	0.832476	primiparity;code_bep_n;m_bmiincl;m_hbincl;ga_days_incl;GWG;w_age;m_muacincl	FALSE
TG.18.0_30.1.	14–21d	Pre+Postnatal	-15.1696	-51.7098	21.3707	-4	0.412924	0.864097	primiparity;code_bep_n;m_bmiincl;m_hbincl;ga_days_incl;GWG;w_age;m_heightincl;m_muacincl	FALSE	TRUE	FALSE	0.677686
TG.18.0_32.0.	14–21d	Pre+Postnatal	0.134175	-6.58994	6.85829	0.445931	0.968569	0.992154	primiparity;m_hbincl;ga_days_incl;GWG;w_age;m_heightincl;m_muacincl	FALSE
TG.18.0_32.1.	14–21d	Pre+Postnatal	-19.0629	-49.2186	11.0928	-4	0.213299	0.764343	primiparity;code_bep_n;m_bmiincl;m_hbincl;ga_days_incl;w_age;m_heightincl;m_muacincl	FALSE
TG.18.0_32.2.	14–21d	Pre+Postnatal	-16.4406	-37.1324	4.25111	-4	0.118399	0.764343	primiparity;m_bmiincl;m_hbincl;ga_days_incl;w_age;m_muacincl	FALSE	FALSE	TRUE	0.85
TG.18.0_34.2.	14–21d	Pre+Postnatal	-16.6494	-52.3679	19.0691	-4	0.358143	0.838373	primiparity;code_bep_n;m_hbincl;GWG;w_age;m_heightincl;m_muacincl	FALSE
TG.18.0_34.3.	14–21d	Pre+Postnatal	0.298936	-3.87706	4.47494	0.8386	0.887605	0.979314	m_bmiincl;m_hbincl;GWG;w_age;m_muacincl	FALSE
TG.18.0_36.1.	14–21d	Pre+Postnatal	-14.3221	-64.0637	35.4194	-4	0.569866	0.909852	primiparity;code_bep_n;m_bmiincl;m_hbincl;ga_days_incl;GWG;w_age;m_heightincl;m_muacincl	FALSE
TG.18.0_36.2.	14–21d	Pre+Postnatal	-12.0032	-86.1814	62.175	-4	0.749354	0.960748	primiparity;code_bep_n;m_bmiincl;m_hbincl;ga_days_incl;GWG;w_age;m_heightincl;m_muacincl	FALSE	TRUE	TRUE	0.677686
TG.18.0_36.3.	14–21d	Pre+Postnatal	-5.3584	-47.955	37.2382	-4	0.803844	0.960748	primiparity;code_bep_n;m_bmiincl;m_hbincl;ga_days_incl;w_age;m_heightincl;m_muacincl	FALSE
TG.18.0_36.4.	14–21d	Pre+Postnatal	2.41702	-12.3302	17.1642	4	0.746309	0.960748	code_bep_n;w_age;m_heightincl;m_muacincl	FALSE
TG.18.0_36.5.	14–21d	Pre+Postnatal	2.66037	1.13455	4.18619	4	0.000752052	0.0175743		TRUE	FALSE	TRUE	0.85
TG.18.0_38.6.	14–21d	Pre+Postnatal	0.258286	-0.773581	1.29015	0.74172	0.621271	0.925455	primiparity;code_bep_n;m_bmiincl;ga_days_incl;GWG;w_age;m_heightincl;m_muacincl	FALSE
TG.18.0_38.7.	14–21d	Pre+Postnatal	0.12944	0.000826563	0.258053	0.434646	0.0485671	0.508232	primiparity;code_bep_n;m_bmiincl;ga_days_incl;GWG;w_age;m_heightincl;m_muacincl	TRUE
TG.18.1_26.0.	14–21d	Pre+Postnatal	-21.4279	-141.612	98.7564	-4	0.724832	0.960673	primiparity;code_bep_n;m_bmiincl;m_hbincl;ga_days_incl;GWG;w_age;m_heightincl;m_muacincl	FALSE
TG.18.1_28.1.	14–21d	Pre+Postnatal	6.09867	-33.4641	45.6614	4	0.760863	0.960748	primiparity;code_bep_n;m_bmiincl;m_hbincl;ga_days_incl;w_age;m_heightincl;m_muacincl	FALSE
TG.18.1_30.0.	14–21d	Pre+Postnatal	-51.5727	-131.822	28.6762	-4	0.205817	0.764343	primiparity;code_bep_n;m_bmiincl;m_hbincl;ga_days_incl;GWG;w_age;m_heightincl;m_muacincl	FALSE
TG.18.1_30.1.	14–21d	Pre+Postnatal	26.1962	-79.4654	131.858	4	0.624594	0.925455	primiparity;code_bep_n;m_bmiincl;m_hbincl;ga_days_incl;w_age;m_heightincl;m_muacincl	FALSE
TG.18.1_30.2.	14–21d	Pre+Postnatal	11.3668	-61.468	84.2016	4	0.757978	0.960748	primiparity;m_bmiincl;m_hbincl;ga_days_incl;GWG;w_age;m_heightincl;m_muacincl	FALSE
TG.18.1_31.0.	14–21d	Pre+Postnatal	-0.637783	-2.9475	1.67194	-1.39384	0.585762	0.915769	primiparity;code_bep_n;m_bmiincl;m_hbincl;ga_days_incl;GWG;w_age;m_heightincl;m_muacincl	FALSE
TG.18.1_32.0.	14–21d	Pre+Postnatal	-39.1939	-106.084	27.6961	-4	0.248454	0.764343	primiparity;code_bep_n;m_bmiincl;m_hbincl;ga_days_incl;GWG;w_age;m_heightincl;m_muacincl	FALSE
TG.18.1_32.1.	14–21d	Pre+Postnatal	-5.68231	-127.033	115.668	-4	0.926325	0.979314	primiparity;code_bep_n;m_bmiincl;m_hbincl;ga_days_incl;GWG;w_age;m_heightincl;m_muacincl	FALSE
TG.18.1_32.2.	14–21d	Pre+Postnatal	-13.3163	-82.8714	56.2389	-4	0.705453	0.960673	primiparity;code_bep_n;m_bmiincl;m_hbincl;ga_days_incl;GWG;w_age;m_heightincl;m_muacincl	FALSE
TG.18.1_32.3.	14–21d	Pre+Postnatal	13.9989	5.67966	22.3181	4	0.00113026	0.0250918	m_bmiincl;w_age;m_muacincl	TRUE
TG.18.1_33.0.	14–21d	Pre+Postnatal	-0.41417	-3.3494	2.52106	-0.860913	0.780569	0.960748	primiparity;m_bmiincl;m_hbincl;ga_days_incl;w_age;m_muacincl	FALSE
TG.18.1_33.1.	14–21d	Pre+Postnatal	-0.251171	-4.78101	4.27867	-0.472446	0.912808	0.979314	primiparity;code_bep_n;m_bmiincl;m_hbincl;ga_days_incl;GWG;w_age;m_heightincl;m_muacincl	FALSE
TG.18.1_33.2.	14–21d	Pre+Postnatal	0.272319	-1.55428	2.09892	0.775163	0.768518	0.960748	code_bep_n;m_bmiincl;m_hbincl;w_age;m_heightincl;m_muacincl	FALSE
TG.18.1_33.3.	14–21d	Pre+Postnatal	0.343142	0.0702493	0.616035	0.943953	0.0141091	0.216016	w_age	TRUE
TG.18.1_34.1.	14–21d	Pre+Postnatal	99.7334	-171.479	370.946	4	0.468175	0.884398	primiparity;code_bep_n;m_bmiincl;m_hbincl;ga_days_incl;GWG;w_age;m_heightincl;m_muacincl	FALSE
TG.18.1_34.2.	14–21d	Pre+Postnatal	-1.49587	-150.152	147.16	-3.43887	0.984148	0.992154	primiparity;m_bmiincl;GWG;w_age;m_heightincl;m_muacincl	FALSE
TG.18.1_34.3.	14–21d	Pre+Postnatal	19.1134	-2.20184	40.4286	4	0.0784144	0.659225	w_age;m_muacincl	FALSE
TG.18.1_34.4.	14–21d	Pre+Postnatal	2.91278	0.12022	5.70534	4	0.0410453	0.467285	w_age	TRUE
TG.18.1_35.2.	14–21d	Pre+Postnatal	0.908043	-2.8675	4.68358	2.29026	0.635059	0.925455	m_hbincl;w_age;m_muacincl	FALSE
TG.18.1_35.3.	14–21d	Pre+Postnatal	0.620916	-0.507461	1.74929	1.60596	0.278414	0.764343	w_age	FALSE
TG.18.1_36.0.	14–21d	Pre+Postnatal	-3.71389	-24.4833	17.0555	-4	0.724073	0.960673	primiparity;code_bep_n;m_bmiincl;m_hbincl;ga_days_incl;w_age;m_heightincl;m_muacincl	FALSE
TG.18.1_36.1.	14–21d	Pre+Postnatal	-8.61765	-104.414	87.1783	-4	0.859014	0.979314	primiparity;code_bep_n;m_bmiincl;m_hbincl;ga_days_incl;w_age;m_heightincl;m_muacincl	FALSE
TG.18.1_36.2.	14–21d	Pre+Postnatal	47.5097	-39.4913	134.511	4	0.281983	0.764343	primiparity;m_bmiincl;m_hbincl;ga_days_incl;w_age;m_muacincl	FALSE
TG.18.1_36.3.	14–21d	Pre+Postnatal	61.2992	-64.9371	187.535	4	0.338474	0.832476	primiparity;m_bmiincl;m_hbincl;ga_days_incl;GWG;w_age;m_muacincl	FALSE
TG.18.1_36.4.	14–21d	Pre+Postnatal	50.5274	-10.0591	111.114	4	0.101398	0.757419	w_age;m_muacincl	FALSE
TG.18.1_36.5.	14–21d	Pre+Postnatal	16.9442	9.97329	23.9151	4	4.00356e-06	0.000412572		TRUE	FALSE	TRUE	0.762238
TG.18.1_36.5.	14–21d	Pre+Postnatal	16.9442	9.97329	23.9151	4	4.00356e-06	0.000412572		TRUE	FALSE	TRUE	0.85
TG.18.1_36.6.	14–21d	Pre+Postnatal	2.66979	1.00384	4.33575	4	0.00189187	0.0399994	m_bmiincl;m_muacincl	TRUE	TRUE	FALSE	0.677686
TG.18.1_36.6.	14–21d	Pre+Postnatal	2.66979	1.00384	4.33575	4	0.00189187	0.0399994	m_bmiincl;m_muacincl	TRUE	TRUE	FALSE	0.85
TG.18.1_38.5.	14–21d	Pre+Postnatal	3.52434	-1.80822	8.8569	4	0.193409	0.764343	w_age	FALSE
TG.18.1_38.6.	14–21d	Pre+Postnatal	2.04553	-0.994046	5.08511	4	0.185407	0.764343	code_bep_n;m_bmiincl;m_hbincl;w_age;m_heightincl;m_muacincl	FALSE
TG.18.1_38.7.	14–21d	Pre+Postnatal	0.667907	0.0921837	1.24363	1.71795	0.0233209	0.323578	primiparity;code_bep_n;m_bmiincl;m_heightincl;m_muacincl	TRUE
TG.18.2_28.0.	14–21d	Pre+Postnatal	-42.2091	-152.44	68.0214	-4	0.45011	0.884398	m_bmiincl;m_hbincl;ga_days_incl;w_age;m_muacincl	FALSE
TG.18.2_30.0.	14–21d	Pre+Postnatal	-43.9128	-121.155	33.329	-4	0.262812	0.764343	primiparity;m_hbincl;w_age;m_muacincl	FALSE	FALSE	TRUE	0.85
TG.18.2_30.1.	14–21d	Pre+Postnatal	9.40914	-68.4652	87.2835	4	0.811443	0.960748	primiparity;m_bmiincl;ga_days_incl;GWG;w_age;m_heightincl;m_muacincl	FALSE
TG.18.2_31.0.	14–21d	Pre+Postnatal	-0.334061	-1.68839	1.02026	-0.669994	0.626359	0.925455	primiparity;code_bep_n;m_bmiincl;m_hbincl;ga_days_incl;w_age;m_heightincl;m_muacincl	FALSE
TG.18.2_32.0.	14–21d	Pre+Postnatal	-34.0077	-88.56	20.5447	-4	0.219684	0.764343	primiparity;code_bep_n;m_bmiincl;m_hbincl;ga_days_incl;GWG;w_age	FALSE	TRUE	TRUE	0.85
TG.18.2_32.1.	14–21d	Pre+Postnatal	-19.2958	-98.2388	59.6473	-4	0.629468	0.925455	primiparity;code_bep_n;m_bmiincl;m_hbincl;ga_days_incl;GWG;w_age;m_heightincl;m_muacincl	FALSE
TG.18.2_32.2.	14–21d	Pre+Postnatal	-9.96282	-80.4557	60.53	-4	0.780212	0.960748	primiparity;code_bep_n;m_bmiincl;m_hbincl;ga_days_incl;GWG;w_age;m_muacincl	FALSE	TRUE	FALSE	0.85
TG.18.2_33.0.	14–21d	Pre+Postnatal	-0.483196	-2.93002	1.96363	-1.02542	0.696651	0.960673	primiparity;code_bep_n;m_bmiincl;m_hbincl;ga_days_incl;w_age;m_heightincl;m_muacincl	FALSE
TG.18.2_33.1.	14–21d	Pre+Postnatal	-0.340475	-3.83333	3.15238	-0.68528	0.84737	0.979314	primiparity;code_bep_n;m_bmiincl;m_hbincl;ga_days_incl;GWG;w_age;m_heightincl	FALSE
TG.18.2_33.2.	14–21d	Pre+Postnatal	0.205374	-1.48308	1.89383	0.615616	0.810193	0.960748	primiparity;code_bep_n;m_bmiincl;m_hbincl;ga_days_incl;GWG;w_age;m_heightincl;m_muacincl	FALSE	TRUE	FALSE	0.677686
TG.18.2_34.0.	14–21d	Pre+Postnatal	-22.5819	-75.6027	30.4389	-4	0.400997	0.86011	primiparity;code_bep_n;m_hbincl;GWG;w_age;m_heightincl;m_muacincl	FALSE	TRUE	FALSE	0.677686
TG.18.2_34.0.	14–21d	Pre+Postnatal	-22.5819	-75.6027	30.4389	-4	0.400997	0.86011	primiparity;code_bep_n;m_hbincl;GWG;w_age;m_heightincl;m_muacincl	FALSE	TRUE	FALSE	0.85
TG.18.2_34.1.	14–21d	Pre+Postnatal	-6.52758	-149.68	136.625	-4	0.928258	0.979314	primiparity;m_bmiincl;m_hbincl;GWG;w_age;m_muacincl	FALSE
TG.18.2_34.2.	14–21d	Pre+Postnatal	-23.941	-154.602	106.72	-4	0.717553	0.960673	code_bep_n;m_bmiincl;m_hbincl;ga_days_incl;GWG;w_age;m_heightincl;m_muacincl	FALSE
TG.18.2_34.3.	14–21d	Pre+Postnatal	7.7892	-5.59736	21.1758	4	0.2518	0.764343	code_bep_n;m_bmiincl;m_hbincl;ga_days_incl;w_age;m_heightincl	FALSE
TG.18.2_34.4.	14–21d	Pre+Postnatal	1.13545	-0.462134	2.73303	2.83222	0.162058	0.764343	primiparity;code_bep_n;m_bmiincl;m_hbincl;ga_days_incl;GWG;w_age;m_heightincl;m_muacincl	FALSE
TG.18.2_35.1.	14–21d	Pre+Postnatal	0.478449	-4.30851	5.26541	1.26642	0.843551	0.977903	code_bep_n;m_bmiincl;m_hbincl;ga_days_incl;GWG;w_age;m_heightincl;m_muacincl	FALSE
TG.18.2_35.2.	14–21d	Pre+Postnatal	0.312195	-2.24665	2.87104	0.870199	0.809634	0.960748	primiparity;code_bep_n;m_bmiincl;m_hbincl;ga_days_incl;w_age;m_heightincl;m_muacincl	FALSE
TG.18.2_35.3.	14–21d	Pre+Postnatal	0.375929	-0.711143	1.463	1.02209	0.49507	0.886335	primiparity;code_bep_n;m_bmiincl;m_hbincl;ga_days_incl;w_age;m_heightincl;m_muacincl	FALSE
TG.18.2_36.0.	14–21d	Pre+Postnatal	-5.14123	-17.1545	6.87204	-4	0.398688	0.859309	primiparity;code_bep_n;m_bmiincl;m_hbincl;ga_days_incl;GWG;w_age;m_heightincl;m_muacincl	FALSE
TG.18.2_36.1.	14–21d	Pre+Postnatal	-5.72879	-54.3647	42.9072	-4	0.816083	0.961116	primiparity;code_bep_n;m_bmiincl;m_hbincl;ga_days_incl;GWG;w_age;m_heightincl;m_muacincl	FALSE
TG.18.2_36.2.	14–21d	Pre+Postnatal	24.583	-60.056	109.222	4	0.566526	0.909852	primiparity;m_bmiincl;m_hbincl;ga_days_incl;GWG;w_age;m_muacincl	FALSE
TG.18.2_36.3.	14–21d	Pre+Postnatal	26.3872	-68.5846	121.359	4	0.583503	0.915769	primiparity;m_hbincl;GWG;w_age;m_muacincl	FALSE
TG.18.2_36.4.	14–21d	Pre+Postnatal	27.1798	-34.4785	88.8381	4	0.384741	0.847849	code_bep_n;m_bmiincl;m_hbincl;ga_days_incl;GWG;w_age;m_heightincl;m_muacincl	FALSE
TG.18.2_36.5.	14–21d	Pre+Postnatal	8.30849	4.36918	12.2478	4	5.39009e-05	0.00227166	m_hbincl	TRUE
TG.18.2_38.4.	14–21d	Pre+Postnatal	0.750868	-5.141	6.64273	1.91567	0.801318	0.960748	primiparity;code_bep_n;m_bmiincl;m_hbincl;ga_days_incl;GWG;w_age;m_heightincl;m_muacincl	FALSE
TG.18.2_38.5.	14–21d	Pre+Postnatal	1.66113	-1.24609	4.56834	4	0.260385	0.764343	code_bep_n;m_bmiincl;m_hbincl;ga_days_incl;w_age;m_heightincl;m_muacincl	FALSE
TG.18.2_38.6.	14–21d	Pre+Postnatal	1.25348	-0.791343	3.2983	3.11351	0.227391	0.764343	primiparity;code_bep_n;m_bmiincl;m_hbincl;ga_days_incl;GWG;w_age;m_heightincl;m_muacincl	FALSE
TG.18.3_30.0.	14–21d	Pre+Postnatal	9.34844	4.90421	13.7927	4	5.62799e-05	0.00227166	m_muacincl	TRUE	TRUE	TRUE	0.762238
TG.18.3_30.0.	14–21d	Pre+Postnatal	9.34844	4.90421	13.7927	4	5.62799e-05	0.00227166	m_muacincl	TRUE	FALSE	TRUE	0.85
TG.18.3_32.0.	14–21d	Pre+Postnatal	5.37655	2.59022	8.16288	4	0.000205583	0.00570494	m_muacincl	TRUE	TRUE	FALSE	0.762238
TG.18.3_32.1.	14–21d	Pre+Postnatal	14.9152	7.86355	21.9669	4	5.14668e-05	0.00227166	m_muacincl	TRUE	FALSE	TRUE	0.762238
TG.18.3_32.1.	14–21d	Pre+Postnatal	14.9152	7.86355	21.9669	4	5.14668e-05	0.00227166	m_muacincl	TRUE	FALSE	TRUE	0.85
TG.18.3_33.2.	14–21d	Pre+Postnatal	0.0660057	0.0285275	0.103484	0.283467	0.000668592	0.0164919	w_age	TRUE
TG.18.3_34.0.	14–21d	Pre+Postnatal	4.28513	1.49576	7.0745	4	0.00286188	0.0529448	m_bmiincl;m_hbincl;m_muacincl	TRUE
TG.18.3_34.1.	14–21d	Pre+Postnatal	28.7964	15.9902	41.6027	4	1.79515e-05	0.00132841		TRUE	TRUE	TRUE	0.762238
TG.18.3_34.1.	14–21d	Pre+Postnatal	28.7964	15.9902	41.6027	4	1.79515e-05	0.00132841		TRUE	TRUE	TRUE	0.85
TG.18.3_34.2.	14–21d	Pre+Postnatal	11.2556	5.6605	16.8507	4	0.000112359	0.00383751		TRUE
TG.18.3_34.3.	14–21d	Pre+Postnatal	2.19729	1.3466	3.04798	4	1.07885e-06	0.000239504		TRUE	TRUE	TRUE	0.762238
TG.18.3_34.3.	14–21d	Pre+Postnatal	2.19729	1.3466	3.04798	4	1.07885e-06	0.000239504		TRUE	TRUE	TRUE	0.85
TG.18.3_35.2.	14–21d	Pre+Postnatal	0.373959	0.196591	0.551326	1.0174	5.40553e-05	0.00227166		TRUE
TG.18.3_36.1.	14–21d	Pre+Postnatal	4.39605	0.902299	7.8898	4	0.0140524	0.216016	m_bmiincl;m_hbincl;m_muacincl	TRUE	TRUE	FALSE	0.85
TG.18.3_36.2.	14–21d	Pre+Postnatal	18.1345	9.76043	26.5086	4	3.47997e-05	0.0022073	m_muacincl	TRUE	FALSE	TRUE	0.762238
TG.18.3_36.2.	14–21d	Pre+Postnatal	18.1345	9.76043	26.5086	4	3.47997e-05	0.0022073	m_muacincl	TRUE	TRUE	TRUE	0.85
TG.18.3_36.3.	14–21d	Pre+Postnatal	15.4198	9.19779	21.6419	4	2.67238e-06	0.000395512		TRUE	FALSE	TRUE	0.762238
TG.18.3_36.3.	14–21d	Pre+Postnatal	15.4198	9.19779	21.6419	4	2.67238e-06	0.000395512		TRUE	FALSE	TRUE	0.85
TG.18.3_36.4.	14–21d	Pre+Postnatal	6.452	4.00817	8.89583	4	6.51006e-07	0.000239504		TRUE	FALSE	TRUE	0.762238
TG.18.3_36.4.	14–21d	Pre+Postnatal	6.452	4.00817	8.89583	4	6.51006e-07	0.000239504		TRUE	TRUE	TRUE	0.85
TG.18.3_38.5.	14–21d	Pre+Postnatal	0.432361	0.253184	0.611538	1.15658	4.64608e-06	0.000412572		TRUE	FALSE	TRUE	0.762238
TG.18.3_38.5.	14–21d	Pre+Postnatal	0.432361	0.253184	0.611538	1.15658	4.64608e-06	0.000412572		TRUE	TRUE	TRUE	0.85
TG.18.3_38.6.	14–21d	Pre+Postnatal	0.231142	0.10923	0.353055	0.677029	0.00026529	0.00692876	primiparity;code_bep_n;m_bmiincl;m_hbincl;ga_days_incl;GWG;w_age;m_heightincl;m_muacincl	TRUE
TG.20.0_32.3.	14–21d	Pre+Postnatal	0.0341362	-0.471054	0.539326	0.207514	0.893855	0.979314	primiparity;m_bmiincl;m_hbincl;ga_days_incl;GWG;w_age;m_muacincl	FALSE	TRUE	FALSE	0.85
TG.20.0_32.4.	14–21d	Pre+Postnatal	0.144933	-0.515326	0.805193	0.471572	0.664792	0.943028	code_bep_n;m_bmiincl;m_hbincl;ga_days_incl;GWG;w_age;m_heightincl;m_muacincl	FALSE	TRUE	FALSE	0.762238
TG.20.0_34.1.	14–21d	Pre+Postnatal	0.161606	-0.989621	1.31283	0.511307	0.781657	0.960748	primiparity;code_bep_n;m_bmiincl;m_hbincl;ga_days_incl;GWG;w_age;m_muacincl	FALSE
TG.20.1_26.1.	14–21d	Pre+Postnatal	0.0275204	-0.318524	0.373565	0.191747	0.875223	0.979314	m_bmiincl;m_hbincl;ga_days_incl;w_age;m_heightincl;m_muacincl	FALSE
TG.20.1_30.1.	14–21d	Pre+Postnatal	0.791765	-1.97672	3.56025	2.01313	0.572483	0.909852	primiparity;m_bmiincl;m_hbincl;ga_days_incl;w_age;m_heightincl;m_muacincl	FALSE	TRUE	FALSE	0.677686
TG.20.1_32.1.	14–21d	Pre+Postnatal	0.289509	-2.9946	3.57362	0.816132	0.861812	0.979314	primiparity;code_bep_n;m_bmiincl;m_hbincl;ga_days_incl;w_age;m_heightincl;m_muacincl	FALSE
TG.20.1_32.2.	14–21d	Pre+Postnatal	0.00721676	-1.96164	1.97608	0.143358	0.994225	0.994225	primiparity;m_bmiincl;ga_days_incl;GWG;w_age;m_heightincl;m_muacincl	FALSE	TRUE	FALSE	0.677686
TG.20.1_32.3.	14–21d	Pre+Postnatal	0.179273	-0.00677335	0.365318	0.55341	0.0588155	0.593501	w_age;m_muacincl	FALSE
TG.20.1_34.0.	14–21d	Pre+Postnatal	-0.0392153	-1.0253	0.946871	0.0326984	0.937407	0.979314	primiparity;m_bmiincl;m_hbincl;ga_days_incl;GWG;w_age;m_muacincl	FALSE
TG.20.1_34.1.	14–21d	Pre+Postnatal	0.391829	-5.00453	5.78819	1.05999	0.885986	0.979314	primiparity;code_bep_n;m_bmiincl;m_hbincl;ga_days_incl;GWG;w_age;m_heightincl;m_muacincl	FALSE
TG.20.1_34.2.	14–21d	Pre+Postnatal	-0.0290295	-3.3582	3.30014	0.0569738	0.986263	0.992154	code_bep_n;m_bmiincl;m_hbincl;ga_days_incl;GWG;w_age;m_muacincl	FALSE
TG.20.1_34.3.	14–21d	Pre+Postnatal	0.386055	-0.119384	0.891493	1.04622	0.133228	0.764343	w_age;m_muacincl	FALSE
TG.20.2_32.0.	14–21d	Pre+Postnatal	-2.00836	-3.89579	-0.120921	-4	0.0372032	0.457061	primiparity;m_hbincl;GWG;w_age;m_muacincl	TRUE
TG.20.2_32.1.	14–21d	Pre+Postnatal	-2.2558	-5.44223	0.93063	-4	0.163712	0.764343	primiparity;m_bmiincl;ga_days_incl;GWG;w_age;m_heightincl;m_muacincl	FALSE
TG.20.2_34.1.	14–21d	Pre+Postnatal	-3.69839	-10.0898	2.69306	-4	0.254366	0.764343	primiparity;m_bmiincl;m_hbincl;ga_days_incl;GWG;w_age;m_heightincl;m_muacincl	FALSE
TG.20.2_34.2.	14–21d	Pre+Postnatal	-2.22438	-6.77885	2.33009	-4	0.335701	0.832476	primiparity;code_bep_n;m_bmiincl;m_hbincl;ga_days_incl;GWG;w_age;m_muacincl	FALSE
TG.20.2_34.3.	14–21d	Pre+Postnatal	0.0767161	-0.735058	0.88849	0.308992	0.851971	0.979314	primiparity;code_bep_n;m_hbincl;ga_days_incl;GWG;w_age;m_heightincl;m_muacincl	FALSE
TG.20.2_34.4.	14–21d	Pre+Postnatal	0.0222249	-0.013099	0.0575488	0.179126	0.21551	0.764343	code_bep_n;m_bmiincl;m_hbincl;w_age	FALSE
TG.20.2_36.5.	14–21d	Pre+Postnatal	0.183226	0.0458266	0.320625	0.562832	0.00933993	0.15359	m_hbincl;w_age	TRUE
TG.20.3_32.0.	14–21d	Pre+Postnatal	-1.81609	-4.7321	1.09992	-4	0.22017	0.764343	m_hbincl;w_age;m_muacincl	FALSE
TG.20.3_32.1.	14–21d	Pre+Postnatal	-0.190524	-4.28322	3.90217	-0.327908	0.926758	0.979314	primiparity;code_bep_n;m_bmiincl;m_hbincl;ga_days_incl;w_age;m_heightincl;m_muacincl	FALSE	TRUE	FALSE	0.85
TG.20.3_32.2.	14–21d	Pre+Postnatal	0.117328	-2.03473	2.26938	0.405781	0.914264	0.979314	primiparity;code_bep_n;m_bmiincl;m_hbincl;ga_days_incl;GWG;w_age;m_heightincl;m_muacincl	FALSE	FALSE	TRUE	0.85
TG.20.3_34.0.	14–21d	Pre+Postnatal	-0.618591	-2.24319	1.00601	-1.3481	0.452633	0.884398	primiparity;code_bep_n;m_bmiincl;m_hbincl;w_age;m_heightincl;m_muacincl	FALSE	TRUE	FALSE	0.762238
TG.20.3_34.1.	14–21d	Pre+Postnatal	-0.516143	-8.11293	7.08064	-1.10394	0.893276	0.979314	primiparity;m_bmiincl;m_hbincl;GWG;w_age;m_heightincl;m_muacincl	FALSE
TG.20.3_34.2.	14–21d	Pre+Postnatal	-0.223116	-4.53943	4.0932	-0.405583	0.918694	0.979314	primiparity;code_bep_n;m_bmiincl;m_hbincl;ga_days_incl;GWG;w_age;m_heightincl;m_muacincl	FALSE
TG.20.3_34.3.	14–21d	Pre+Postnatal	0.304191	-0.452432	1.06081	0.851124	0.427883	0.879538	code_bep_n;m_hbincl;ga_days_incl;w_age;m_muacincl	FALSE
TG.20.3_36.3.	14–21d	Pre+Postnatal	1.00443	-2.13567	4.14452	2.51996	0.52802	0.909852	m_bmiincl;w_age;m_muacincl	FALSE
TG.20.3_36.4.	14–21d	Pre+Postnatal	0.740328	-0.459367	1.94002	1.89055	0.224368	0.764343	code_bep_n;m_bmiincl;m_hbincl;ga_days_incl;w_age;m_heightincl	FALSE
TG.20.3_36.5.	14–21d	Pre+Postnatal	0.102424	0.052113	0.152734	0.37026	9.40381e-05	0.00347941	m_hbincl	TRUE
TG.20.4_30.0.	14–21d	Pre+Postnatal	-2.83311	-8.71092	3.04469	-4	0.342064	0.832476	primiparity;m_hbincl;ga_days_incl;w_age;m_heightincl;m_muacincl	FALSE	TRUE	TRUE	0.85
TG.20.4_32.0.	14–21d	Pre+Postnatal	-2.71357	-6.2853	0.858161	-4	0.13528	0.764343	primiparity;w_age;m_muacincl	FALSE	TRUE	TRUE	0.85
TG.20.4_32.1.	14–21d	Pre+Postnatal	0.195351	-4.12733	4.51803	0.59173	0.928892	0.979314	primiparity;code_bep_n;m_bmiincl;m_hbincl;ga_days_incl;w_age;m_heightincl;m_muacincl	FALSE
TG.20.4_32.2.	14–21d	Pre+Postnatal	-0.130064	-2.63272	2.37259	-0.183817	0.918257	0.979314	primiparity;code_bep_n;m_bmiincl;m_hbincl;ga_days_incl;GWG;w_age;m_heightincl;m_muacincl	FALSE
TG.20.4_33.2.	14–21d	Pre+Postnatal	0.00711882	-0.0600316	0.0742692	0.143124	0.834185	0.972121	primiparity;code_bep_n;m_bmiincl;m_hbincl;ga_days_incl;GWG;w_age;m_heightincl;m_muacincl	FALSE
TG.20.4_34.0.	14–21d	Pre+Postnatal	-1.07833	-2.88291	0.726258	-2.44376	0.239276	0.764343	primiparity;m_bmiincl;m_hbincl;ga_days_incl;GWG;w_age;m_muacincl	FALSE
TG.20.4_34.1.	14–21d	Pre+Postnatal	0.359977	-6.52906	7.24902	0.984074	0.917823	0.979314	primiparity;m_hbincl;ga_days_incl;GWG;w_age;m_muacincl	FALSE
TG.20.4_34.2.	14–21d	Pre+Postnatal	0.143703	-4.67757	4.96498	0.468639	0.953066	0.987975	code_bep_n;m_bmiincl;m_hbincl;ga_days_incl;GWG;w_age;m_heightincl;m_muacincl	FALSE
TG.20.4_34.3.	14–21d	Pre+Postnatal	0.416626	-0.149459	0.982711	1.11908	0.147812	0.764343	code_bep_n;m_hbincl;ga_days_incl;GWG;w_age	FALSE	TRUE	FALSE	0.762238
TG.20.4_36.2.	14–21d	Pre+Postnatal	1.59211	-4.29408	7.4783	3.92056	0.593483	0.918141	primiparity;m_bmiincl;m_hbincl;ga_days_incl;w_age;m_muacincl	FALSE
TG.20.4_36.3.	14–21d	Pre+Postnatal	1.52601	-1.80933	4.86134	3.76302	0.367096	0.840158	primiparity;GWG;w_age;m_muacincl	FALSE
TG.20.4_36.4.	14–21d	Pre+Postnatal	0.984061	-0.526289	2.49441	2.47143	0.1997	0.764343	code_bep_n;m_bmiincl;m_hbincl;ga_days_incl;w_age;m_heightincl	FALSE
TG.20.4_36.5.	14–21d	Pre+Postnatal	0.306851	0.149212	0.464491	0.857463	0.00018185	0.00538275	m_bmiincl	TRUE
TG.20.5_34.0.	14–21d	Pre+Postnatal	0.566167	-0.374448	1.50678	1.47548	0.235898	0.764343	primiparity;code_bep_n;m_bmiincl;GWG;w_age;m_heightincl;m_muacincl	FALSE
TG.20.5_34.1.	14–21d	Pre+Postnatal	2.77893	-2.00322	7.56108	4	0.2524	0.764343	primiparity;code_bep_n;m_bmiincl;m_hbincl;w_age;m_heightincl;m_muacincl	FALSE
TG.20.5_34.2.	14–21d	Pre+Postnatal	2.0298	-0.800534	4.86013	4	0.158323	0.764343	primiparity;code_bep_n;m_bmiincl;m_hbincl;ga_days_incl;GWG;w_age;m_heightincl;m_muacincl	FALSE
TG.20.5_36.2.	14–21d	Pre+Postnatal	1.59526	-0.171455	3.36198	3.92808	0.0763709	0.659225	primiparity;code_bep_n;m_bmiincl;w_age;m_heightincl;m_muacincl	FALSE	TRUE	FALSE	0.85
TG.20.5_36.3.	14–21d	Pre+Postnatal	1.15412	0.00399761	2.30423	2.87671	0.0492207	0.508232	primiparity;code_bep_n;m_bmiincl;m_hbincl;ga_days_incl;w_age;m_heightincl;m_muacincl	TRUE
TG.22.0_32.4.	14–21d	Pre+Postnatal	0.00234707	-0.0772226	0.0819167	0.131752	0.953549	0.987975	primiparity;code_bep_n;m_bmiincl;m_hbincl;ga_days_incl;GWG;w_age;m_heightincl;m_muacincl	FALSE
TG.22.1_32.5.	14–21d	Pre+Postnatal	0.0518477	0.019259	0.0844365	0.249725	0.00203371	0.041044	w_age	TRUE
TG.22.2_32.4.	14–21d	Pre+Postnatal	0.0515064	-0.057617	0.16063	0.248911	0.352139	0.836095	code_bep_n;m_bmiincl;m_hbincl;ga_days_incl;GWG;w_age;m_muacincl	FALSE	TRUE	FALSE	0.85
TG.22.3_30.2.	14–21d	Pre+Postnatal	0.00444969	-0.0204191	0.0293185	0.136763	0.723909	0.960673	code_bep_n;m_bmiincl;m_hbincl;ga_days_incl;GWG;w_age;m_heightincl;m_muacincl	FALSE
TG.22.4_32.0.	14–21d	Pre+Postnatal	-0.462026	-0.899594	-0.0244577	-0.974966	0.0386589	0.457061	primiparity;m_hbincl;w_age;m_muacincl	TRUE
TG.22.4_32.2.	14–21d	Pre+Postnatal	-0.187198	-0.574095	0.199698	-0.319983	0.340248	0.832476	code_bep_n;m_bmiincl;m_hbincl;ga_days_incl;w_age;m_muacincl	FALSE	TRUE	TRUE	0.85
TG.22.4_34.2.	14–21d	Pre+Postnatal	-0.516916	-1.26846	0.23463	-1.10578	0.175964	0.764343	code_bep_n;m_bmiincl;m_hbincl;ga_days_incl;w_age;m_muacincl	FALSE
TG.22.5_32.0.	14–21d	Pre+Postnatal	-0.497216	-1.82241	0.827976	-1.05883	0.459226	0.884398	primiparity;code_bep_n;m_bmiincl;m_hbincl;ga_days_incl;GWG;m_heightincl;m_muacincl	FALSE	FALSE	TRUE	0.85
TG.22.5_32.1.	14–21d	Pre+Postnatal	0.576452	-1.36384	2.51674	1.49999	0.557748	0.909852	primiparity;code_bep_n;m_bmiincl;m_heightincl;m_muacincl	FALSE
TG.22.5_34.1.	14–21d	Pre+Postnatal	0.341046	-2.4281	3.11019	0.938959	0.807892	0.960748	code_bep_n;m_bmiincl;GWG;w_age;m_heightincl;m_muacincl	FALSE
TG.22.5_34.2.	14–21d	Pre+Postnatal	0.223815	-1.60006	2.04769	0.659567	0.808541	0.960748	primiparity;code_bep_n;m_bmiincl;m_hbincl;ga_days_incl;GWG;w_age;m_heightincl;m_muacincl	FALSE	TRUE	FALSE	0.677686
TG.22.5_34.3.	14–21d	Pre+Postnatal	0.129598	-0.132177	0.391373	0.435023	0.329138	0.832476	primiparity;code_bep_n;m_bmiincl;m_hbincl;ga_days_incl;GWG;w_age;m_heightincl;m_muacincl	FALSE
TG.22.6_32.0.	14–21d	Pre+Postnatal	0.772141	-3.17672	4.721	1.96637	0.699473	0.960673	primiparity;code_bep_n;m_bmiincl;m_hbincl;ga_days_incl;GWG;w_age;m_heightincl;m_muacincl	FALSE	TRUE	FALSE	0.85
TG.22.6_32.1.	14–21d	Pre+Postnatal	3.15714	-3.63648	9.95076	4	0.359548	0.838373	primiparity;code_bep_n;m_bmiincl;m_hbincl;ga_days_incl;GWG;w_age;m_heightincl;m_muacincl	FALSE
TG.22.6_34.1.	14–21d	Pre+Postnatal	6.29866	-7.24821	19.8455	4	0.359353	0.838373	code_bep_n;m_bmiincl;m_hbincl;ga_days_incl;GWG;m_heightincl;m_muacincl	FALSE
TG.22.6_34.2.	14–21d	Pre+Postnatal	3.59158	-5.11282	12.296	4	0.41577	0.864097	primiparity;code_bep_n;m_bmiincl;m_hbincl;ga_days_incl;GWG;w_age;m_heightincl;m_muacincl	FALSE
TG.22.6_34.3.	14–21d	Pre+Postnatal	0.965993	-0.112364	2.04435	2.42837	0.0786913	0.659225	primiparity;code_bep_n;m_bmiincl;m_hbincl;ga_days_incl;GWG;w_age;m_heightincl;m_muacincl	FALSE
Hex3Cer.d18.1.16.0.	14–21d	Pre+Postnatal	-0.00506164	-0.0324824	0.0223591	0.114095	0.715576	0.960673	primiparity;code_bep_n;m_bmiincl;m_hbincl;GWG;w_age	FALSE
Choline	14–21d	Pre+Postnatal	-13.3287	-37.7733	11.1159	-4	0.282723	0.764343	primiparity;code_bep_n;m_bmiincl;m_hbincl;ga_days_incl;w_age	FALSE
C0	14–21d	Prenatal	0.809557	-5.11149	6.7306	2.05554	0.787095	0.919659	code_bep_n;m_bmiincl;ga_days_incl;GWG;w_age;m_muacincl	FALSE
C2	14–21d	Prenatal	-0.816615	-5.14393	3.5107	-1.82004	0.709316	0.889651	primiparity;code_bep_n;m_bmiincl;m_hbincl;ga_days_incl;w_age;m_heightincl;m_muacincl	FALSE
C3	14–21d	Prenatal	0.00113954	-0.304087	0.306366	0.128874	0.994114	0.994114	primiparity;code_bep_n;m_bmiincl;m_hbincl;GWG;w_age;m_heightincl;m_muacincl	FALSE
C4	14–21d	Prenatal	-0.0836266	-0.324282	0.157028	-0.073145	0.492717	0.795514	primiparity;code_bep_n;m_bmiincl;m_hbincl;ga_days_incl;GWG;w_age;m_heightincl;m_muacincl	FALSE
C6..C4.1.DC.	14–21d	Prenatal	-0.00569789	-0.060784	0.0493883	0.112579	0.8381	0.941702	primiparity;w_age;m_heightincl;m_muacincl	FALSE
C12	14–21d	Prenatal	0.0539857	-0.180135	0.288106	0.25482	0.648777	0.860755	primiparity;code_bep_n;m_bmiincl;m_hbincl;ga_days_incl;GWG;w_age;m_heightincl;m_muacincl	FALSE
C12.1	14–21d	Prenatal	0.00544295	-0.0258046	0.0366905	0.13913	0.730754	0.901276	primiparity;code_bep_n;m_bmiincl;m_hbincl;ga_days_incl;GWG;w_age;m_heightincl;m_muacincl	FALSE
C14	14–21d	Prenatal	-0.147445	-0.40893	0.11404	-0.225241	0.266487	0.73692	primiparity;m_bmiincl;GWG;m_heightincl;m_muacincl	FALSE
C14.2.OH	14–21d	Prenatal	-0.00517018	-0.0133937	0.00305333	0.113837	0.215632	0.73692	m_bmiincl;m_hbincl;GWG;w_age;m_heightincl;m_muacincl	FALSE
C18	14–21d	Prenatal	0.00723798	-0.00343072	0.0179067	0.143408	0.181788	0.73692	primiparity;m_muacincl	FALSE
TMAO	14–21d	Prenatal	-1.05405	-2.57005	0.461953	-2.3859	0.171166	0.73692	primiparity;code_bep_n;m_bmiincl;m_hbincl;ga_days_incl;GWG;w_age;m_heightincl;m_muacincl	FALSE	TRUE	FALSE	0.677686
X1.Met.His	14–21d	Prenatal	0.0426673	-0.0606645	0.145999	0.227846	0.415185	0.772164	primiparity;code_bep_n;m_bmiincl;m_hbincl;ga_days_incl;GWG;w_age;m_heightincl;m_muacincl	FALSE
X3.Met.His	14–21d	Prenatal	0.178687	-0.0893934	0.446768	0.552016	0.189411	0.73692	primiparity;code_bep_n;m_bmiincl;m_hbincl;ga_days_incl;GWG;w_age;m_heightincl;m_muacincl	FALSE
AABA	14–21d	Prenatal	0.265632	-0.334009	0.865273	0.759227	0.38217	0.76434	primiparity;code_bep_n;m_bmiincl;ga_days_incl;GWG;w_age;m_heightincl;m_muacincl	FALSE
alpha.AAA	14–21d	Prenatal	0.65362	-0.107254	1.41449	1.6839	0.0915749	0.73692	primiparity;m_bmiincl;GWG;m_heightincl	FALSE
Cit	14–21d	Prenatal	1.02208	-0.0440202	2.08819	2.56204	0.0600719	0.73692	primiparity;code_bep_n;m_bmiincl;m_hbincl;ga_days_incl;GWG;w_age;m_heightincl;m_muacincl	FALSE
Creatinine	14–21d	Prenatal	3.55025	-1.80213	8.90263	4	0.191623	0.73692	primiparity;m_bmiincl;GWG;m_muacincl	FALSE
Cystine	14–21d	Prenatal	-3.94191	-9.79291	1.90909	-4	0.184791	0.73692	m_bmiincl;ga_days_incl;GWG;m_muacincl	FALSE
HArg	14–21d	Prenatal	-0.00237432	-0.0227303	0.0179817	0.1205	0.817744	0.927755	primiparity;code_bep_n;m_bmiincl;m_hbincl;ga_days_incl;GWG;w_age;m_muacincl	FALSE
Kynurenine	14–21d	Prenatal	0.105173	-0.0333206	0.243666	0.376812	0.135308	0.73692	primiparity;code_bep_n;m_hbincl;ga_days_incl;GWG;w_age;m_heightincl;m_muacincl	FALSE
Met.SO	14–21d	Prenatal	0.116319	-0.0299119	0.262549	0.403375	0.117923	0.73692	m_bmiincl;GWG;m_heightincl;m_muacincl	FALSE
Orn	14–21d	Prenatal	0.484272	-0.723013	1.69156	1.2803	0.428647	0.772164	primiparity;m_bmiincl;ga_days_incl;GWG;w_age;m_heightincl	FALSE
ProBetaine	14–21d	Prenatal	-0.0770407	-0.246996	0.0929145	-0.0574491	0.371196	0.760256	primiparity;code_bep_n;m_bmiincl;m_hbincl;ga_days_incl;GWG;w_age;m_heightincl;m_muacincl	FALSE
SDMA	14–21d	Prenatal	0.0117137	-0.0153889	0.0388163	0.154075	0.393829	0.770132	primiparity;m_bmiincl;m_hbincl;ga_days_incl;GWG;w_age;m_muacincl	FALSE
t4.OH.Pro	14–21d	Prenatal	1.75566	-2.18247	5.6938	4	0.379177	0.76434	primiparity;m_bmiincl;GWG;w_age;m_heightincl;m_muacincl	FALSE
Taurine	14–21d	Prenatal	21.6346	-26.1217	69.3909	4	0.371567	0.760256	m_bmiincl;GWG;w_age;m_heightincl;m_muacincl	FALSE
TrpBetaine	14–21d	Prenatal	0.0550335	-0.565989	0.676056	0.257317	0.861007	0.948604	primiparity;m_bmiincl;m_hbincl;GWG;w_age;m_heightincl;m_muacincl	FALSE
Ala	14–21d	Prenatal	-16.1445	-70.9012	38.6123	-4	0.560499	0.830918	m_bmiincl;m_hbincl;GWG;m_heightincl;m_muacincl	FALSE
Arg	14–21d	Prenatal	-0.108457	-4.78455	4.56763	-0.132323	0.963448	0.989021	primiparity;m_bmiincl;ga_days_incl;w_age;m_heightincl;m_muacincl	FALSE
Asn	14–21d	Prenatal	4.3727	-0.924997	9.67039	4	0.104853	0.73692	primiparity;GWG;m_muacincl	FALSE	TRUE	FALSE	0.677686
Asp	14–21d	Prenatal	-0.392612	-13.1933	12.408	-0.809535	0.951681	0.989021	primiparity;m_bmiincl;ga_days_incl;GWG;m_muacincl	FALSE
Cys	14–21d	Prenatal	-1.15035	-5.6334	3.3327	-2.61542	0.61235	0.857677	primiparity;code_bep_n;m_bmiincl;m_hbincl;GWG;m_heightincl;m_muacincl	FALSE	TRUE	FALSE	0.762238
Cys	14–21d	Prenatal	-1.15035	-5.6334	3.3327	-2.61542	0.61235	0.857677	primiparity;code_bep_n;m_bmiincl;m_hbincl;GWG;m_heightincl;m_muacincl	FALSE	TRUE	FALSE	0.677686
Gln	14–21d	Prenatal	17.7272	-54.3524	89.8068	4	0.627165	0.860755	primiparity;m_bmiincl;m_hbincl;ga_days_incl;GWG;w_age;m_heightincl	FALSE
Glu	14–21d	Prenatal	18.6855	-127.492	164.863	4	0.800633	0.925732	primiparity;code_bep_n;m_bmiincl;ga_days_incl;GWG;w_age;m_heightincl	FALSE
Gly	14–21d	Prenatal	5.92007	-18.8646	30.7047	4	0.637103	0.860755	primiparity;m_bmiincl;m_hbincl;GWG;w_age;m_heightincl;m_muacincl	FALSE
His	14–21d	Prenatal	-0.0934104	-4.41112	4.2243	-0.0964621	0.9659	0.989021	primiparity;code_bep_n;m_bmiincl;m_hbincl;ga_days_incl;GWG;w_age;m_heightincl;m_muacincl	FALSE
Ile	14–21d	Prenatal	1.29431	-1.49709	4.08571	3.21083	0.360509	0.754428	primiparity;m_bmiincl;GWG	FALSE
Leu	14–21d	Prenatal	1.54121	-4.68496	7.76738	3.79925	0.624975	0.860755	primiparity;m_bmiincl;ga_days_incl;GWG;m_heightincl	FALSE
Lys	14–21d	Prenatal	0.467152	-6.11996	7.05426	1.2395	0.888568	0.969065	primiparity;code_bep_n;m_bmiincl;ga_days_incl;GWG;w_age;m_muacincl	FALSE
Met	14–21d	Prenatal	0.633457	-0.741549	2.00846	1.63585	0.363621	0.754428	primiparity;GWG	FALSE
Phe	14–21d	Prenatal	1.24239	-0.983389	3.46817	3.08709	0.271344	0.73692	primiparity;m_bmiincl;GWG;m_heightincl	FALSE
Pro	14–21d	Prenatal	2.85941	-8.40855	14.1274	4	0.616325	0.86053	primiparity;m_bmiincl;GWG;w_age	FALSE
Ser	14–21d	Prenatal	8.71136	-6.8668	24.2895	4	0.270451	0.73692	primiparity;m_hbincl;GWG;w_age;m_muacincl	FALSE
Thr	14–21d	Prenatal	3.52359	-8.57364	15.6208	4	0.565174	0.830918	primiparity;code_bep_n;m_bmiincl;m_hbincl;ga_days_incl;GWG;w_age;m_heightincl;m_muacincl	FALSE
Trp	14–21d	Prenatal	0.486757	-0.56948	1.54299	1.28622	0.363445	0.754428	primiparity;m_bmiincl;GWG	FALSE
Tyr	14–21d	Prenatal	2.50991	-0.603357	5.62318	4	0.113087	0.73692	code_bep_n;m_bmiincl;m_hbincl;GWG;w_age	FALSE
Val	14–21d	Prenatal	3.85949	-3.02931	10.7483	4	0.269511	0.73692	primiparity;code_bep_n;m_bmiincl;m_hbincl;ga_days_incl;GWG;w_age;m_muacincl	FALSE
beta.Ala	14–21d	Prenatal	0.242036	-0.0345452	0.518618	0.702993	0.085739	0.73692	m_bmiincl;GWG;m_heightincl;m_muacincl	FALSE
GABA	14–21d	Prenatal	0.0200361	-0.0278322	0.0679045	0.17391	0.408899	0.772164	primiparity;m_bmiincl;m_hbincl;ga_days_incl;w_age;m_muacincl	FALSE
Putrescine	14–21d	Prenatal	0.0829763	-0.336427	0.502379	0.323912	0.695924	0.880314	primiparity;code_bep_n;m_bmiincl;m_hbincl;ga_days_incl;GWG;w_age;m_heightincl;m_muacincl	FALSE
Spermidine	14–21d	Prenatal	-0.0194271	-1.55924	1.52039	0.0798588	0.980111	0.989021	primiparity;code_bep_n;m_bmiincl;m_hbincl;ga_days_incl;GWG;w_age;m_muacincl	FALSE
Spermine	14–21d	Prenatal	-0.212824	-1.62656	1.20092	-0.381056	0.766143	0.904658	primiparity;code_bep_n;m_bmiincl;m_hbincl;ga_days_incl;GWG;w_age;m_heightincl;m_muacincl	FALSE
H1	14–21d	Prenatal	58.557	-57.5457	174.66	4	0.319979	0.742994	primiparity;code_bep_n;m_hbincl;ga_days_incl;GWG;w_age;m_heightincl;m_muacincl	FALSE
AconAcid	14–21d	Prenatal	0.646416	-0.995693	2.28853	1.66673	0.437279	0.772164	primiparity;m_bmiincl;GWG;w_age;m_heightincl;m_muacincl	FALSE
HipAcid	14–21d	Prenatal	0.066854	-8.24854	8.38225	0.285489	0.987325	0.991793	primiparity;code_bep_n;m_bmiincl;m_hbincl;ga_days_incl;GWG;w_age;m_heightincl	FALSE
OH.GlutAcid	14–21d	Prenatal	0.161753	-0.0752883	0.398794	0.511657	0.179245	0.73692	primiparity;GWG;m_heightincl;m_muacincl	FALSE
Cer.d16.1.20.0.	14–21d	Prenatal	-0.0516516	-0.106055	0.00275233	0.00305969	0.0625652	0.73692	primiparity;code_bep_n;m_hbincl;ga_days_incl;GWG;w_age;m_heightincl	FALSE
Cer.d16.1.22.0.	14–21d	Prenatal	-0.0704691	-0.214738	0.0738002	-0.0417873	0.33541	0.742994	primiparity;code_bep_n;m_hbincl;ga_days_incl;GWG;w_age;m_heightincl;m_muacincl	FALSE
Cer.d16.1.24.0.	14–21d	Prenatal	-0.0881793	-0.198181	0.0218221	-0.0839951	0.115101	0.73692	primiparity;code_bep_n;m_hbincl;ga_days_incl;GWG;w_age;m_heightincl;m_muacincl	FALSE
Cer.d18.1.14.0.	14–21d	Prenatal	-0.052995	-0.126963	0.0209733	-0.00014193	0.158614	0.73692	primiparity;code_bep_n;m_hbincl;ga_days_incl;GWG;w_age;m_heightincl;m_muacincl	FALSE
Cer.d18.1.16.0.	14–21d	Prenatal	0.0339188	-0.128008	0.195846	0.206996	0.679036	0.875101	primiparity;code_bep_n;m_bmiincl;m_hbincl;ga_days_incl;GWG;w_age;m_heightincl;m_muacincl	FALSE
Cer.d18.1.18.0.	14–21d	Prenatal	-0.0429036	-0.157671	0.0718632	0.0239082	0.460594	0.777147	primiparity;code_bep_n;m_bmiincl;m_hbincl;ga_days_incl;GWG;w_age;m_heightincl;m_muacincl	FALSE
Cer.d18.1.20.0.OH..	14–21d	Prenatal	-0.12465	-0.503709	0.254408	-0.170915	0.516185	0.827387	primiparity;code_bep_n;m_bmiincl;m_hbincl;ga_days_incl;GWG;w_age;m_heightincl;m_muacincl	FALSE
Cer.d18.1.20.0.	14–21d	Prenatal	-0.00429841	-0.101503	0.0929062	0.115914	0.930373	0.981201	primiparity;code_bep_n;m_bmiincl;m_hbincl;ga_days_incl;GWG;w_age;m_muacincl	FALSE
Cer.d18.1.22.0.	14–21d	Prenatal	0.0426833	-0.290242	0.375609	0.227884	0.800053	0.925732	primiparity;ga_days_incl;GWG;w_age;m_heightincl;m_muacincl	FALSE
Cer.d18.1.23.0.	14–21d	Prenatal	0.0124651	-0.0667737	0.0917039	0.155866	0.755973	0.904658	primiparity;m_bmiincl;m_hbincl;ga_days_incl;GWG;w_age;m_muacincl	FALSE
Cer.d18.1.24.0.	14–21d	Prenatal	0.164235	-0.625504	0.953975	0.517573	0.681238	0.875101	primiparity;code_bep_n;m_bmiincl;m_hbincl;ga_days_incl;GWG;w_age;m_muacincl	FALSE
Cer.d18.1.24.1.	14–21d	Prenatal	-0.233611	-0.722205	0.254983	-0.430596	0.345663	0.74359	primiparity;m_bmiincl;m_hbincl;ga_days_incl;GWG;w_age;m_heightincl;m_muacincl	FALSE
Cer.d18.2.20.0.	14–21d	Prenatal	-0.00783022	-0.0347065	0.0190461	0.107497	0.56508	0.830918	primiparity;code_bep_n;m_bmiincl;m_hbincl;ga_days_incl;GWG;w_age;m_heightincl;m_muacincl	FALSE
Cer.d18.2.22.0.	14–21d	Prenatal	0.00561076	-0.0538787	0.0651002	0.13953	0.852162	0.945241	primiparity;code_bep_n;m_bmiincl;m_hbincl;ga_days_incl;GWG;w_age;m_heightincl;m_muacincl	FALSE
Cer.d18.2.24.0.	14–21d	Prenatal	-0.00474374	-0.105433	0.0959453	0.114853	0.925827	0.980228	primiparity;code_bep_n;m_bmiincl;m_hbincl;ga_days_incl;GWG;w_age;m_heightincl;m_muacincl	FALSE
Cer.d18.2.24.1.	14–21d	Prenatal	-0.0214944	-0.0638413	0.0208525	0.0749319	0.316884	0.742994	primiparity;code_bep_n;m_bmiincl;m_hbincl;ga_days_incl;GWG;w_age;m_heightincl;m_muacincl	FALSE
CE.14.0.	14–21d	Prenatal	-0.731061	-1.84011	0.37799	-1.61615	0.194364	0.73692	primiparity;m_hbincl;ga_days_incl;w_age;m_heightincl	FALSE
CE.16.0.	14–21d	Prenatal	-0.0939795	-0.689413	0.501454	-0.0978184	0.755188	0.904658	primiparity;code_bep_n;m_hbincl;ga_days_incl;GWG;w_age;m_heightincl;m_muacincl	FALSE
CE.18.0.	14–21d	Prenatal	0.0382811	-0.128496	0.205058	0.217392	0.650296	0.860755	primiparity;code_bep_n;m_bmiincl;ga_days_incl;GWG;w_age;m_heightincl;m_muacincl	FALSE
CE.18.1.	14–21d	Prenatal	0.232067	-0.358601	0.822735	0.679234	0.438136	0.772164	primiparity;m_bmiincl;ga_days_incl;GWG;w_age;m_heightincl;m_muacincl	FALSE
CE.18.2.	14–21d	Prenatal	0.30928	-0.502247	1.12081	0.863251	0.451986	0.772164	primiparity;m_bmiincl;m_hbincl;GWG;w_age;m_heightincl	FALSE
CE.18.3.	14–21d	Prenatal	0.00738065	-0.0211338	0.0358951	0.143748	0.609255	0.857557	primiparity;code_bep_n;m_bmiincl;m_hbincl;GWG;w_age;m_muacincl	FALSE
CE.20.4.	14–21d	Prenatal	0.03094	-0.0963454	0.158226	0.199896	0.631177	0.860755	primiparity;m_bmiincl;m_hbincl;ga_days_incl;GWG;w_age;m_heightincl	FALSE
CE.22.6.	14–21d	Prenatal	-0.0183398	-0.0655146	0.0288349	0.0824501	0.44295	0.772164	primiparity;code_bep_n;m_bmiincl;m_hbincl;ga_days_incl;GWG;m_heightincl;m_muacincl	FALSE
p.Cresol.SO4	14–21d	Prenatal	0.354111	-0.187853	0.896075	0.970096	0.198318	0.73692	m_bmiincl;GWG;m_heightincl	FALSE
DG.14.0_18.1.	14–21d	Prenatal	-7.82438	-14.6689	-0.979893	-4	0.0254059	0.73692	m_bmiincl;m_hbincl;GWG;m_heightincl;m_muacincl	TRUE
DG.14.0_18.2.	14–21d	Prenatal	-10.727	-19.5478	-1.9062	-4	0.0175682	0.73692	m_bmiincl;m_hbincl;GWG;m_heightincl;m_muacincl	TRUE
DG.16.0_16.1.	14–21d	Prenatal	-0.768159	-1.65365	0.11733	-1.70456	0.0884571	0.73692	m_bmiincl;m_hbincl;GWG;m_heightincl;m_muacincl	FALSE
DG.16.0_18.1.	14–21d	Prenatal	-3.46409	-9.62227	2.6941	-4	0.267636	0.73692	code_bep_n;m_bmiincl;m_hbincl;GWG;m_heightincl;m_muacincl	FALSE
DG.16.0_18.2.	14–21d	Prenatal	-3.99702	-10.1354	2.1414	-4	0.199798	0.73692	primiparity;m_bmiincl;m_hbincl;GWG;m_heightincl;m_muacincl	FALSE
DG.16.0_20.3.	14–21d	Prenatal	-0.239985	-0.546164	0.0661939	-0.445787	0.123324	0.73692	primiparity;m_bmiincl;m_hbincl;GWG;m_heightincl;m_muacincl	FALSE
DG.16.1_18.0.	14–21d	Prenatal	-0.0117935	-0.0888838	0.0652968	0.0980516	0.762479	0.904658	primiparity;code_bep_n;m_bmiincl;m_hbincl;GWG;w_age;m_heightincl;m_muacincl	FALSE
DG.16.1_18.1.	14–21d	Prenatal	-0.302248	-0.987926	0.38343	-0.594175	0.384539	0.764563	code_bep_n;m_bmiincl;m_hbincl;GWG;w_age;m_heightincl;m_muacincl	FALSE
DG.16.1_18.2.	14–21d	Prenatal	-0.488689	-1.24454	0.267162	-1.03851	0.202977	0.73692	m_bmiincl;m_hbincl;ga_days_incl;GWG;m_heightincl;m_muacincl	FALSE
DG.17.0_18.1.	14–21d	Prenatal	-0.00309522	-0.207228	0.201037	0.118782	0.976097	0.989021	primiparity;code_bep_n;m_bmiincl;m_hbincl;ga_days_incl;GWG;w_age;m_heightincl;m_muacincl	FALSE
DG.18.1_18.1.	14–21d	Prenatal	0.0769523	-1.04371	1.19762	0.309555	0.892077	0.969065	primiparity;code_bep_n;m_bmiincl;m_hbincl;ga_days_incl;GWG;w_age;m_muacincl	FALSE
DG.18.1_18.2.	14–21d	Prenatal	-0.973466	-5.28314	3.33621	-2.19386	0.655477	0.862232	primiparity;code_bep_n;m_bmiincl;m_hbincl;ga_days_incl;GWG;w_age;m_heightincl;m_muacincl	FALSE
DG.18.1_18.3.	14–21d	Prenatal	-0.00648814	-0.321257	0.308281	0.110696	0.96751	0.989021	primiparity;code_bep_n;m_bmiincl;m_hbincl;ga_days_incl;GWG;w_age;m_heightincl;m_muacincl	FALSE	TRUE	TRUE	0.85
DG.18.1_20.1.	14–21d	Prenatal	-0.00300988	-0.0181479	0.0121281	0.118985	0.694486	0.880314	primiparity;code_bep_n;m_bmiincl;m_hbincl;ga_days_incl;GWG;w_age;m_heightincl;m_muacincl	FALSE
DG.18.1_20.2.	14–21d	Prenatal	-0.0269041	-0.165037	0.111229	0.0620391	0.700416	0.883479	primiparity;code_bep_n;m_bmiincl;m_hbincl;ga_days_incl;GWG;w_age;m_heightincl;m_muacincl	FALSE
DG.18.1_20.3.	14–21d	Prenatal	-0.0358553	-0.108776	0.0370655	0.0407061	0.332221	0.742994	primiparity;code_bep_n;m_bmiincl;m_hbincl;GWG;w_age;m_heightincl;m_muacincl	FALSE
DG.18.1_22.6.	14–21d	Prenatal	0.269814	-0.28417	0.823799	0.769194	0.336854	0.742994	m_bmiincl;ga_days_incl;GWG;w_age;m_muacincl	FALSE
DG.18.2_18.2.	14–21d	Prenatal	-2.44507	-7.13086	2.24071	-4	0.303639	0.742994	m_bmiincl;m_hbincl;GWG;m_heightincl;m_muacincl	FALSE
DG.18.2_18.3.	14–21d	Prenatal	-0.0693156	-0.495416	0.356784	-0.0390382	0.747917	0.904658	primiparity;code_bep_n;m_bmiincl;m_hbincl;ga_days_incl;GWG;w_age;m_heightincl;m_muacincl	FALSE
DG.18.3_20.2.	14–21d	Prenatal	-0.000294366	-0.0118716	0.0112829	0.125457	0.959928	0.989021	primiparity;code_bep_n;m_bmiincl;m_hbincl;ga_days_incl;GWG;w_age;m_heightincl;m_muacincl	FALSE
Hex2Cer.d18.1.14.0.	14–21d	Prenatal	-0.0150257	-0.0357692	0.00571775	0.0903484	0.154134	0.73692	primiparity;m_hbincl;GWG;m_heightincl;m_muacincl	FALSE
Hex2Cer.d18.1.16.0.	14–21d	Prenatal	0.234261	-0.175868	0.644389	0.684461	0.260389	0.73692	primiparity;GWG;w_age;m_muacincl	FALSE
Hex2Cer.d18.1.18.0.	14–21d	Prenatal	0.0269243	-0.0435144	0.097363	0.190326	0.450677	0.772164	primiparity;m_hbincl;ga_days_incl;w_age;m_muacincl	FALSE
Hex2Cer.d18.1.20.0.	14–21d	Prenatal	0.0313999	-0.0730937	0.135893	0.200992	0.55299	0.830918	primiparity;code_bep_n;m_bmiincl;m_hbincl;ga_days_incl;w_age;m_muacincl	FALSE
Hex2Cer.d18.1.22.0.	14–21d	Prenatal	0.0844048	-0.204483	0.373292	0.327316	0.564	0.830918	primiparity;m_bmiincl;m_hbincl;ga_days_incl;w_age;m_heightincl;m_muacincl	FALSE
Hex2Cer.d18.1.24.0.	14–21d	Prenatal	0.102351	-0.412076	0.616777	0.370086	0.694314	0.880314	primiparity;code_bep_n;m_bmiincl;m_hbincl;ga_days_incl;w_age;m_heightincl;m_muacincl	FALSE
Hex2Cer.d18.1.24.1.	14–21d	Prenatal	0.111133	-0.170817	0.393084	0.391018	0.436713	0.772164	primiparity;m_hbincl;GWG;w_age;m_muacincl	FALSE	TRUE	FALSE	0.677686
AA	14–21d	Prenatal	-5.10719	-10.3273	0.112898	-4	0.0550829	0.73692	m_bmiincl;m_hbincl;GWG;m_heightincl;m_muacincl	FALSE
DHA	14–21d	Prenatal	-1.71869	-4.03059	0.593202	-3.96993	0.143664	0.73692	primiparity;m_bmiincl;ga_days_incl;GWG;w_age;m_heightincl	FALSE
EPA	14–21d	Prenatal	-0.904417	-2.43033	0.621493	-2.0293	0.242972	0.73692	GWG;w_age;m_heightincl	FALSE
FA.12.0.	14–21d	Prenatal	-358.362	-602.335	-114.389	-4	0.00432595	0.428977	m_bmiincl;m_hbincl;GWG;m_muacincl	TRUE	TRUE	FALSE	0.677686
FA.14.0.	14–21d	Prenatal	-331.798	-534.395	-129.201	-4	0.00153052	0.428977	m_bmiincl;m_hbincl;GWG;m_muacincl	TRUE
FA.18.1.	14–21d	Prenatal	-64.7158	-138.477	9.0458	-4	0.0849365	0.73692	code_bep_n;m_bmiincl;m_hbincl;GWG;m_heightincl;m_muacincl	FALSE
FA.18.2.	14–21d	Prenatal	-29.7283	-56.7774	-2.67911	-4	0.0315098	0.73692	m_bmiincl;m_hbincl;GWG;m_heightincl;m_muacincl	TRUE
FA.20.2.	14–21d	Prenatal	-3.58991	-8.15315	0.973332	-4	0.121967	0.73692	m_bmiincl;m_hbincl;GWG;m_heightincl;m_muacincl	FALSE
FA.20.3.	14–21d	Prenatal	-3.10684	-6.07296	-0.140713	-4	0.0402303	0.73692	m_bmiincl;m_hbincl;GWG;m_heightincl;m_muacincl	TRUE
HexCer.d16.1.22.0.	14–21d	Prenatal	-0.0113851	-0.0269979	0.00422772	0.0990249	0.151376	0.73692	primiparity;code_bep_n;m_bmiincl;m_hbincl;ga_days_incl;GWG;w_age;m_heightincl;m_muacincl	FALSE
HexCer.d16.1.24.0.	14–21d	Prenatal	-0.00973499	-0.0331827	0.0137127	0.102958	0.412666	0.772164	primiparity;code_bep_n;m_bmiincl;m_hbincl;ga_days_incl;GWG;w_age;m_muacincl	FALSE
HexCer.d18.1.14.0.	14–21d	Prenatal	-0.0207815	-0.0556213	0.0140583	0.076631	0.239917	0.73692	primiparity;code_bep_n;m_bmiincl;m_hbincl;GWG;w_age;m_heightincl;m_muacincl	FALSE
HexCer.d18.1.16.0.	14–21d	Prenatal	0.037373	-0.0663172	0.141063	0.215228	0.47687	0.787101	primiparity;m_hbincl;ga_days_incl;w_age;m_muacincl	FALSE
HexCer.d18.1.18.0.	14–21d	Prenatal	0.0266913	-0.0263933	0.079776	0.189771	0.321485	0.742994	primiparity;m_bmiincl;m_hbincl;ga_days_incl;w_age;m_muacincl	FALSE
HexCer.d18.1.20.0.	14–21d	Prenatal	0.0580859	-0.0569338	0.173106	0.264592	0.31938	0.742994	primiparity;m_bmiincl;m_hbincl;ga_days_incl;w_age;m_muacincl	FALSE
HexCer.d18.1.22.0.	14–21d	Prenatal	0.463869	-0.311682	1.23942	1.23168	0.238683	0.73692	primiparity;m_bmiincl;ga_days_incl;w_age;m_muacincl	FALSE
HexCer.d18.1.23.0.	14–21d	Prenatal	0.0843556	-0.0742956	0.243007	0.327199	0.294622	0.742994	primiparity;ga_days_incl;w_age;m_muacincl	FALSE
HexCer.d18.1.24.0.	14–21d	Prenatal	0.365648	-0.533663	1.26496	0.99759	0.422404	0.772164	primiparity;m_bmiincl;m_hbincl;ga_days_incl;w_age;m_muacincl	FALSE
HexCer.d18.1.24.1.	14–21d	Prenatal	0.219142	-1.10945	1.54774	0.64843	0.744542	0.904658	primiparity;code_bep_n;m_bmiincl;m_hbincl;ga_days_incl;w_age;m_heightincl;m_muacincl	FALSE
HexCer.d18.1.26.0.	14–21d	Prenatal	0.00261584	-0.0111463	0.0163779	0.132393	0.707313	0.889651	primiparity;code_bep_n;m_bmiincl;ga_days_incl;GWG;w_age;m_heightincl;m_muacincl	FALSE
HexCer.d18.1.26.1.	14–21d	Prenatal	-0.0145518	-0.0560465	0.0269429	0.0914779	0.488835	0.795028	primiparity;code_bep_n;ga_days_incl;GWG;m_heightincl;m_muacincl	FALSE
HexCer.d18.2.16.0.	14–21d	Prenatal	0.000569443	-0.00219603	0.00333492	0.127516	0.684188	0.875446	primiparity;m_bmiincl;m_hbincl;ga_days_incl;GWG;w_age;m_heightincl;m_muacincl	FALSE
HexCer.d18.2.18.0.	14–21d	Prenatal	0.00428947	-0.00471666	0.0132956	0.136381	0.347572	0.74359	primiparity;m_hbincl;ga_days_incl;w_age;m_heightincl;m_muacincl	FALSE
HexCer.d18.2.20.0.	14–21d	Prenatal	0.00580332	-0.00918945	0.0207961	0.139989	0.444928	0.772164	primiparity;m_hbincl;ga_days_incl;GWG;w_age;m_heightincl;m_muacincl	FALSE
HexCer.d18.2.22.0.	14–21d	Prenatal	0.0532373	-0.161295	0.26777	0.253036	0.624069	0.860755	primiparity;code_bep_n;m_bmiincl;m_hbincl;ga_days_incl;w_age;m_heightincl;m_muacincl	FALSE
HexCer.d18.2.23.0.	14–21d	Prenatal	0.0104851	-0.0185482	0.0395184	0.151147	0.475952	0.787101	primiparity;code_bep_n;m_bmiincl;m_hbincl;ga_days_incl;w_age;m_heightincl;m_muacincl	FALSE
HexCer.d18.2.24.0.	14–21d	Prenatal	0.104592	-0.37968	0.588865	0.375429	0.669692	0.873444	primiparity;code_bep_n;m_bmiincl;m_hbincl;ga_days_incl;w_age;m_muacincl	FALSE
Ind.SO4	14–21d	Prenatal	0.0728256	-0.00108575	0.146737	0.29972	0.0534069	0.73692	primiparity;m_bmiincl;GWG;m_heightincl;m_muacincl	FALSE
lysoPC.a.C14.0	14–21d	Prenatal	0.0166887	-0.567765	0.601142	0.165932	0.955003	0.989021	primiparity;code_bep_n;m_bmiincl;m_hbincl;ga_days_incl;GWG;w_age;m_heightincl;m_muacincl	FALSE
lysoPC.a.C16.0	14–21d	Prenatal	0.125842	-0.48067	0.732353	0.426071	0.681948	0.875101	primiparity;code_bep_n;m_bmiincl;ga_days_incl;GWG;w_age;m_heightincl	FALSE
lysoPC.a.C18.0	14–21d	Prenatal	0.117245	-0.527385	0.761876	0.405584	0.719399	0.894714	primiparity;m_bmiincl;ga_days_incl;w_age;m_heightincl;m_muacincl	FALSE
lysoPC.a.C18.1	14–21d	Prenatal	0.0986294	-0.157426	0.354685	0.361217	0.447197	0.772164	primiparity;m_bmiincl;ga_days_incl;w_age;m_heightincl	FALSE
lysoPC.a.C18.2	14–21d	Prenatal	-0.086686	-0.938277	0.764905	-0.0804361	0.840594	0.941702	primiparity;code_bep_n;m_bmiincl;m_hbincl;ga_days_incl;GWG;w_age;m_heightincl;m_muacincl	FALSE
lysoPC.a.C20.4	14–21d	Prenatal	-0.00727816	-0.0560513	0.041495	0.108813	0.768127	0.904658	primiparity;code_bep_n;m_bmiincl;m_hbincl;ga_days_incl;GWG;w_age;m_heightincl;m_muacincl	FALSE
lysoPC.a.C26.1	14–21d	Prenatal	0.0295362	-0.111332	0.170404	0.196551	0.678762	0.875101	primiparity;m_bmiincl;ga_days_incl;GWG;w_age;m_heightincl;m_muacincl	FALSE
PC.aa.C28.1	14–21d	Prenatal	-0.116696	-0.257286	0.0238937	-0.151958	0.102911	0.73692	primiparity;m_bmiincl;m_hbincl;GWG;w_age;m_muacincl	FALSE
PC.aa.C30.0	14–21d	Prenatal	-0.715066	-1.95663	0.526497	-1.57802	0.256444	0.73692	primiparity;m_hbincl;ga_days_incl;w_age;m_muacincl	FALSE
PC.aa.C32.0	14–21d	Prenatal	0.495454	-1.95002	2.94092	1.30695	0.688995	0.879062	primiparity;m_bmiincl;m_hbincl;ga_days_incl;GWG;w_age;m_heightincl;m_muacincl	FALSE
PC.aa.C32.1	14–21d	Prenatal	-0.055257	-0.377511	0.266997	-0.00553304	0.734793	0.902369	primiparity;code_bep_n;m_bmiincl;m_hbincl;ga_days_incl;GWG;w_age;m_heightincl;m_muacincl	FALSE
PC.aa.C32.2	14–21d	Prenatal	-0.0976803	-0.232482	0.0371213	-0.106638	0.15396	0.73692	primiparity;code_bep_n;m_hbincl;ga_days_incl;GWG;w_age;m_heightincl;m_muacincl	FALSE
PC.aa.C32.3	14–21d	Prenatal	-0.00229215	-0.00971977	0.00513546	0.120696	0.542353	0.830361	primiparity;m_bmiincl;m_hbincl;GWG;w_age;m_muacincl	FALSE
PC.aa.C34.1	14–21d	Prenatal	1.05367	-1.29906	3.40639	2.63732	0.377058	0.76434	primiparity;ga_days_incl;w_age;m_muacincl	FALSE
PC.aa.C34.2	14–21d	Prenatal	0.295113	-1.94472	2.53495	0.829488	0.794641	0.925435	primiparity;m_hbincl;ga_days_incl;w_age;m_heightincl;m_muacincl	FALSE
PC.aa.C34.3	14–21d	Prenatal	0.0166097	-0.0522392	0.0854586	0.165744	0.633721	0.860755	primiparity;m_bmiincl;m_hbincl;ga_days_incl;GWG;w_age;m_heightincl;m_muacincl	FALSE
PC.aa.C34.4	14–21d	Prenatal	-0.016919	-0.0380239	0.00418589	0.0858362	0.115082	0.73692	primiparity;m_hbincl;ga_days_incl;GWG;w_age;m_heightincl;m_muacincl	FALSE
PC.aa.C36.1	14–21d	Prenatal	0.419567	-1.25534	2.09448	1.12609	0.620819	0.860755	primiparity;m_bmiincl;ga_days_incl;w_age;m_heightincl;m_muacincl	FALSE
PC.aa.C36.2	14–21d	Prenatal	1.18627	-3.4031	5.77565	2.95334	0.609748	0.857557	primiparity;m_bmiincl;ga_days_incl;GWG;w_age;m_muacincl	FALSE
PC.aa.C36.3	14–21d	Prenatal	0.582412	-0.602903	1.76773	1.5142	0.332608	0.742994	primiparity;m_bmiincl;ga_days_incl;w_age;m_muacincl	FALSE
PC.aa.C36.4	14–21d	Prenatal	0.150938	-0.433961	0.735838	0.485883	0.610333	0.857557	primiparity;code_bep_n;m_bmiincl;m_hbincl;ga_days_incl;w_age;m_muacincl	FALSE
PC.aa.C36.5	14–21d	Prenatal	0.00760398	-0.0241482	0.0393562	0.144281	0.636317	0.860755	primiparity;m_bmiincl;GWG	FALSE
PC.aa.C36.6	14–21d	Prenatal	0.000784714	-0.0112223	0.0127917	0.128029	0.897252	0.970152	primiparity;code_bep_n;m_bmiincl;ga_days_incl;GWG;w_age;m_heightincl;m_muacincl	FALSE
PC.aa.C38.0	14–21d	Prenatal	0.0281086	-0.0598836	0.116101	0.193149	0.528303	0.827837	primiparity;GWG;w_age;m_heightincl;m_muacincl	FALSE
PC.aa.C38.3	14–21d	Prenatal	-0.111938	-0.48136	0.257484	-0.140618	0.549656	0.830918	primiparity;m_bmiincl;m_hbincl;GWG;w_age;m_heightincl;m_muacincl	FALSE
PC.aa.C38.4	14–21d	Prenatal	0.0386923	-0.415162	0.492547	0.218372	0.866224	0.951989	primiparity;code_bep_n;m_bmiincl;m_hbincl;ga_days_incl;GWG;w_age;m_heightincl;m_muacincl	FALSE
PC.aa.C38.5	14–21d	Prenatal	0.0419901	-0.114074	0.198054	0.226232	0.595216	0.851614	primiparity;m_bmiincl;ga_days_incl;GWG;w_age;m_muacincl	FALSE
PC.aa.C38.6	14–21d	Prenatal	0.0206326	-0.0898368	0.131102	0.175331	0.712204	0.890757	primiparity;ga_days_incl;w_age;m_heightincl;m_muacincl	FALSE
PC.aa.C40.3	14–21d	Prenatal	-0.0150334	-0.0406069	0.0105401	0.09033	0.246812	0.73692	primiparity;code_bep_n;GWG;m_heightincl;m_muacincl	FALSE
PC.aa.C40.4	14–21d	Prenatal	0.00829025	-0.0456678	0.0622483	0.145916	0.761516	0.904658	primiparity;m_hbincl;ga_days_incl;w_age;m_muacincl	FALSE
PC.aa.C40.5	14–21d	Prenatal	0.0108434	-0.028542	0.0502288	0.152001	0.586694	0.845754	primiparity;m_bmiincl;ga_days_incl;GWG;w_age;m_muacincl	FALSE
PC.aa.C40.6	14–21d	Prenatal	0.0466526	-0.0748453	0.16815	0.237343	0.448622	0.772164	primiparity;m_bmiincl;GWG;w_age;m_muacincl	FALSE
PC.aa.C42.4	14–21d	Prenatal	-0.000288309	-0.00735925	0.00678263	0.125471	0.935787	0.984572	primiparity;code_bep_n;m_bmiincl;m_hbincl;ga_days_incl;w_age;m_heightincl;m_muacincl	FALSE
PC.ae.C30.1	14–21d	Prenatal	0.0283206	-0.162831	0.219472	0.193654	0.769738	0.904658	primiparity;code_bep_n;m_bmiincl;m_hbincl;ga_days_incl;GWG;w_age;m_heightincl;m_muacincl	FALSE
PC.ae.C30.2	14–21d	Prenatal	-0.00447099	-0.010235	0.00129308	0.115503	0.127248	0.73692	m_bmiincl;GWG;m_heightincl;m_muacincl	FALSE
PC.ae.C32.1	14–21d	Prenatal	0.0428717	-0.0663534	0.152097	0.228333	0.438658	0.772164	primiparity;ga_days_incl;w_age;m_muacincl	FALSE
PC.ae.C34.0	14–21d	Prenatal	0.0470773	-0.0398542	0.134009	0.238356	0.285839	0.73692	primiparity;w_age;m_muacincl	FALSE
PC.ae.C34.1	14–21d	Prenatal	0.111874	-0.0889543	0.312702	0.392782	0.272323	0.73692	primiparity;w_age;m_muacincl	FALSE
PC.ae.C34.2	14–21d	Prenatal	0.0869041	-0.10476	0.278568	0.333273	0.371174	0.760256	primiparity;ga_days_incl;w_age;m_muacincl	FALSE
PC.ae.C34.3	14–21d	Prenatal	-0.04093	-0.186707	0.104847	0.0286118	0.57926	0.842272	primiparity;code_bep_n;m_bmiincl;m_hbincl;ga_days_incl;GWG;w_age;m_heightincl;m_muacincl	FALSE	TRUE	FALSE	0.762238
PC.ae.C34.3	14–21d	Prenatal	-0.04093	-0.186707	0.104847	0.0286118	0.57926	0.842272	primiparity;code_bep_n;m_bmiincl;m_hbincl;ga_days_incl;GWG;w_age;m_heightincl;m_muacincl	FALSE	TRUE	FALSE	0.677686
PC.ae.C36.1	14–21d	Prenatal	0.0550386	-0.0381381	0.148215	0.257329	0.24455	0.73692	primiparity;m_bmiincl;w_age;m_muacincl	FALSE
PC.ae.C36.2	14–21d	Prenatal	0.0818358	-0.0798816	0.243553	0.321194	0.318465	0.742994	primiparity;w_age;m_muacincl	FALSE
PC.ae.C36.3	14–21d	Prenatal	0.0743024	-0.0586018	0.207207	0.30324	0.270567	0.73692	primiparity;m_bmiincl;ga_days_incl;w_age;m_muacincl	FALSE
PC.ae.C36.4	14–21d	Prenatal	-0.0467926	-0.174129	0.080544	0.0146398	0.468269	0.781621	primiparity;code_bep_n;m_bmiincl;m_hbincl;ga_days_incl;GWG;w_age;m_muacincl	FALSE	TRUE	FALSE	0.762238
PC.ae.C36.4	14–21d	Prenatal	-0.0467926	-0.174129	0.080544	0.0146398	0.468269	0.781621	primiparity;code_bep_n;m_bmiincl;m_hbincl;ga_days_incl;GWG;w_age;m_muacincl	FALSE	TRUE	FALSE	0.677686
PC.ae.C36.5	14–21d	Prenatal	-0.0704505	-0.183671	0.0427694	-0.041743	0.220394	0.73692	primiparity;GWG;m_heightincl;m_muacincl	FALSE
PC.ae.C38.2	14–21d	Prenatal	0.0143414	-0.0122382	0.0409211	0.160338	0.287597	0.73692	primiparity;w_age;m_muacincl	FALSE
PC.ae.C38.3	14–21d	Prenatal	0.0238522	-0.00912679	0.0568311	0.183004	0.154796	0.73692	primiparity;m_muacincl	FALSE
PC.ae.C38.4	14–21d	Prenatal	-0.0101573	-0.121494	0.10118	0.101951	0.856944	0.946476	primiparity;code_bep_n;m_bmiincl;m_hbincl;ga_days_incl;GWG;w_age;m_heightincl;m_muacincl	FALSE
PC.ae.C38.5	14–21d	Prenatal	-0.00299374	-0.137421	0.131433	0.119024	0.964898	0.989021	primiparity;code_bep_n;m_bmiincl;m_hbincl;ga_days_incl;GWG;w_age;m_heightincl;m_muacincl	FALSE
PC.ae.C38.6	14–21d	Prenatal	-0.00580881	-0.0398081	0.0281905	0.112315	0.735715	0.902369	primiparity;m_bmiincl;m_hbincl;ga_days_incl;GWG;w_age;m_heightincl;m_muacincl	FALSE
PC.ae.C40.2	14–21d	Prenatal	0.0124379	-0.0189251	0.043801	0.155801	0.43391	0.772164	primiparity;GWG;w_age;m_heightincl;m_muacincl	FALSE
PC.ae.C40.3	14–21d	Prenatal	0.0144407	-0.00626475	0.0351462	0.160574	0.169927	0.73692	primiparity;w_age;m_muacincl	FALSE
PC.ae.C40.4	14–21d	Prenatal	0.0267265	-0.0182311	0.0716842	0.189855	0.241511	0.73692	primiparity;m_bmiincl;ga_days_incl;GWG;w_age;m_muacincl	FALSE
PC.ae.C40.5	14–21d	Prenatal	0.0265144	-0.0572118	0.110241	0.189349	0.531822	0.827837	primiparity;code_bep_n;m_bmiincl;ga_days_incl;GWG;w_age;m_heightincl;m_muacincl	FALSE
PC.ae.C40.6	14–21d	Prenatal	0.0369072	-0.047985	0.121799	0.214118	0.391049	0.768255	primiparity;m_bmiincl;ga_days_incl;GWG;w_age;m_heightincl;m_muacincl	FALSE
PC.ae.C42.3	14–21d	Prenatal	0.0108786	-0.00633648	0.0280938	0.152085	0.213344	0.73692	primiparity;ga_days_incl;w_age;m_muacincl	FALSE
SM..OH..C14.1	14–21d	Prenatal	0.009391	-0.0209949	0.0397769	0.14854	0.541753	0.830361	primiparity;m_bmiincl;ga_days_incl;w_age;m_heightincl;m_muacincl	FALSE
SM..OH..C16.1	14–21d	Prenatal	0.0154028	-0.0162964	0.047102	0.162867	0.338029	0.742994	primiparity;m_bmiincl;w_age	FALSE
SM..OH..C22.1	14–21d	Prenatal	0.0859946	-0.160294	0.332283	0.331105	0.490676	0.795111	primiparity;m_bmiincl;m_hbincl;ga_days_incl;GWG;w_age;m_muacincl	FALSE
SM..OH..C22.2	14–21d	Prenatal	0.000783478	-0.0488036	0.0503705	0.128026	0.975094	0.989021	primiparity;code_bep_n;m_bmiincl;m_hbincl;ga_days_incl;GWG;w_age;m_heightincl	FALSE
SM..OH..C24.1	14–21d	Prenatal	0.0107744	-0.0393006	0.0608494	0.151837	0.670821	0.873444	primiparity;m_bmiincl;m_hbincl;ga_days_incl;GWG;w_age;m_heightincl;m_muacincl	FALSE
SM.C16.0	14–21d	Prenatal	0.53639	-0.845871	1.91865	1.40451	0.443834	0.772164	primiparity;m_bmiincl;ga_days_incl;w_age;m_muacincl	FALSE
SM.C16.1	14–21d	Prenatal	0.0325596	-0.0365959	0.101715	0.203756	0.353186	0.746736	primiparity;m_bmiincl;w_age	FALSE
SM.C18.0	14–21d	Prenatal	0.147827	-0.456033	0.751688	0.478468	0.628799	0.860755	primiparity;m_hbincl;ga_days_incl;w_age;m_muacincl	FALSE
SM.C18.1	14–21d	Prenatal	0.0252823	-0.027878	0.0784426	0.186413	0.348348	0.74359	primiparity;m_bmiincl;w_age	FALSE
SM.C20.2	14–21d	Prenatal	-0.00306038	-0.00780685	0.00168609	0.118865	0.204243	0.73692	m_bmiincl;m_hbincl;GWG;m_muacincl	FALSE
SM.C22.3	14–21d	Prenatal	-0.0016627	-0.0153982	0.0120728	0.122196	0.810967	0.926272	primiparity;code_bep_n;m_bmiincl;m_hbincl;ga_days_incl;GWG;w_age;m_heightincl;m_muacincl	FALSE
SM.C24.0	14–21d	Prenatal	0.283228	-1.88345	2.44991	0.801162	0.796208	0.925435	primiparity;code_bep_n;m_bmiincl;m_hbincl;ga_days_incl;GWG;w_age;m_muacincl	FALSE
SM.C24.1	14–21d	Prenatal	-0.311252	-1.54729	0.924784	-0.615633	0.618946	0.860755	primiparity;code_bep_n;m_bmiincl;m_hbincl;ga_days_incl;GWG;w_age;m_heightincl;m_muacincl	FALSE
SM.C26.0	14–21d	Prenatal	0.0127832	-0.0215242	0.0470907	0.156624	0.462088	0.777147	primiparity;m_bmiincl;ga_days_incl;GWG;w_age;m_heightincl;m_muacincl	FALSE
SM.C26.1	14–21d	Prenatal	-0.000383643	-0.0364189	0.0356516	0.125244	0.983215	0.989904	primiparity;code_bep_n;m_bmiincl;m_hbincl;ga_days_incl;GWG;w_age;m_heightincl;m_muacincl	FALSE
TG.14.0_32.2.	14–21d	Prenatal	-86.9334	-146.883	-26.9837	-4	0.00483082	0.428977	m_bmiincl;GWG;m_heightincl;m_muacincl	TRUE
TG.14.0_34.0.	14–21d	Prenatal	-2.04258	-9.69663	5.61147	-4	0.598196	0.851614	primiparity;code_bep_n;m_bmiincl;ga_days_incl;GWG;w_age;m_heightincl;m_muacincl	FALSE
TG.14.0_34.1.	14–21d	Prenatal	-56.6809	-114.038	0.676487	-4	0.0527206	0.73692	primiparity;m_bmiincl;w_age;m_muacincl	FALSE
TG.14.0_34.2.	14–21d	Prenatal	-57.1969	-109.747	-4.64701	-4	0.0331519	0.73692	m_bmiincl;m_heightincl;m_muacincl	TRUE
TG.14.0_34.3.	14–21d	Prenatal	-8.94262	-16.8411	-1.04415	-4	0.0268151	0.73692	m_bmiincl;GWG;m_heightincl;m_muacincl	TRUE
TG.14.0_35.1.	14–21d	Prenatal	-0.78145	-2.03815	0.475253	-1.73624	0.220722	0.73692	m_bmiincl;m_heightincl;m_muacincl	FALSE
TG.14.0_35.2.	14–21d	Prenatal	-0.662678	-1.91771	0.592353	-1.45317	0.297945	0.742994	primiparity;m_bmiincl;ga_days_incl;m_heightincl;m_muacincl	FALSE
TG.14.0_36.1.	14–21d	Prenatal	2.64151	-23.9046	29.1877	4	0.844138	0.941702	primiparity;code_bep_n;m_bmiincl;ga_days_incl;GWG;w_age;m_heightincl;m_muacincl	FALSE
TG.14.0_36.2.	14–21d	Prenatal	-8.03458	-58.1791	42.11	-4	0.75158	0.904658	primiparity;code_bep_n;m_bmiincl;m_hbincl;ga_days_incl;GWG;w_age;m_heightincl;m_muacincl	FALSE
TG.14.0_36.3.	14–21d	Prenatal	-14.3866	-59.3513	30.5781	-4	0.527572	0.827837	primiparity;m_bmiincl;m_hbincl;ga_days_incl;GWG;w_age;m_heightincl;m_muacincl	FALSE	TRUE	FALSE	0.677686
TG.14.0_36.4.	14–21d	Prenatal	-10.3063	-34.7424	14.1298	-4	0.40539	0.772164	ga_days_incl;GWG;m_heightincl;m_muacincl	FALSE
TG.14.0_38.4.	14–21d	Prenatal	-3.38741	-7.79734	1.02252	-4	0.130929	0.73692	primiparity;m_bmiincl;GWG;w_age;m_heightincl;m_muacincl	FALSE
TG.14.0_38.5.	14–21d	Prenatal	-2.12518	-4.99211	0.741738	-4	0.144832	0.73692	m_bmiincl;ga_days_incl;m_heightincl;m_muacincl	FALSE
TG.16.0_28.1.	14–21d	Prenatal	2.66445	-31.3172	36.6461	4	0.876874	0.961313	primiparity;code_bep_n;m_bmiincl;m_hbincl;ga_days_incl;GWG;w_age;m_heightincl;m_muacincl	FALSE
TG.16.0_28.2.	14–21d	Prenatal	3.50606	-18.3288	25.3409	4	0.751066	0.904658	primiparity;code_bep_n;m_bmiincl;m_hbincl;ga_days_incl;GWG;w_age;m_heightincl;m_muacincl	FALSE
TG.16.0_30.2.	14–21d	Prenatal	-30.6918	-87.7162	26.3327	-4	0.288793	0.73692	ga_days_incl;m_heightincl;m_muacincl	FALSE
TG.16.0_32.0.	14–21d	Prenatal	7.18851	-7.87069	22.2477	4	0.346497	0.74359	code_bep_n;m_bmiincl;m_hbincl;ga_days_incl;GWG;w_age;m_heightincl	FALSE
TG.16.0_32.1.	14–21d	Prenatal	-46.1287	-98.4633	6.20597	-4	0.083524	0.73692	primiparity;m_bmiincl;w_age;m_heightincl;m_muacincl	FALSE
TG.16.0_32.2.	14–21d	Prenatal	-48.6236	-94.6285	-2.61867	-4	0.038485	0.73692	m_bmiincl;m_heightincl;m_muacincl	TRUE	TRUE	FALSE	0.85
TG.16.0_32.3.	14–21d	Prenatal	-3.36536	-7.3876	0.656874	-4	0.100235	0.73692	m_bmiincl;m_heightincl;m_muacincl	FALSE
TG.16.0_33.1.	14–21d	Prenatal	-0.526662	-2.44995	1.39662	-1.12901	0.588727	0.845938	primiparity;m_bmiincl;GWG;m_heightincl;m_muacincl	FALSE
TG.16.0_33.2.	14–21d	Prenatal	-0.19854	-1.30108	0.903999	-0.347012	0.72203	0.895478	primiparity;code_bep_n;m_bmiincl;m_hbincl;ga_days_incl;GWG;w_age;m_heightincl;m_muacincl	FALSE
TG.16.0_34.0.	14–21d	Prenatal	22.6326	7.74805	37.5171	4	0.00317457	0.428977	m_bmiincl;m_hbincl;GWG;m_heightincl	TRUE
TG.16.0_34.1.	14–21d	Prenatal	13.2659	-76.4455	102.977	4	0.770182	0.904658	primiparity;code_bep_n;m_bmiincl;ga_days_incl;GWG;w_age;m_heightincl;m_muacincl	FALSE
TG.16.0_34.2.	14–21d	Prenatal	1.8293	-65.435	69.0936	4	0.957145	0.989021	code_bep_n;m_bmiincl;m_hbincl;ga_days_incl;GWG;w_age;m_heightincl;m_muacincl	FALSE
TG.16.0_34.3.	14–21d	Prenatal	-1.32561	-12.8353	10.1841	-3.0331	0.820018	0.927755	code_bep_n;m_bmiincl;ga_days_incl;GWG;m_heightincl;m_muacincl	FALSE
TG.16.0_34.4.	14–21d	Prenatal	-1.01748	-2.57442	0.539454	-2.29876	0.198229	0.73692	primiparity;code_bep_n;ga_days_incl;m_heightincl	FALSE
TG.16.0_35.1.	14–21d	Prenatal	0.833719	-1.31185	2.97928	2.11312	0.443193	0.772164	primiparity;code_bep_n;m_hbincl;ga_days_incl;GWG;m_heightincl;m_muacincl	FALSE
TG.16.0_35.2.	14–21d	Prenatal	0.822212	-1.3331	2.97753	2.0857	0.451492	0.772164	primiparity;code_bep_n;m_bmiincl;m_hbincl;ga_days_incl;GWG;w_age;m_heightincl;m_muacincl	FALSE
TG.16.0_35.3.	14–21d	Prenatal	0.208687	-0.796212	1.21359	0.623512	0.681641	0.875101	primiparity;code_bep_n;m_bmiincl;m_hbincl;ga_days_incl;GWG;w_age;m_heightincl;m_muacincl	FALSE
TG.16.0_36.2.	14–21d	Prenatal	89.793	-27.5068	207.093	4	0.132262	0.73692	primiparity;ga_days_incl;w_age;m_muacincl	FALSE
TG.16.0_36.3.	14–21d	Prenatal	56.038	-44.7251	156.801	4	0.273117	0.73692	primiparity;m_heightincl;m_muacincl	FALSE
TG.16.0_36.4.	14–21d	Prenatal	27.1829	-26.6861	81.052	4	0.319758	0.742994	code_bep_n;m_bmiincl;m_hbincl;ga_days_incl;GWG;w_age;m_heightincl	FALSE
TG.16.0_36.5.	14–21d	Prenatal	1.37833	-1.97878	4.73545	3.41108	0.417832	0.772164	primiparity;code_bep_n;m_bmiincl;m_hbincl;ga_days_incl;GWG;w_age;m_heightincl;m_muacincl	FALSE
TG.16.0_36.6.	14–21d	Prenatal	-0.845019	-1.84639	0.156353	-1.88774	0.097357	0.73692	primiparity;code_bep_n;m_bmiincl;m_hbincl;ga_days_incl;GWG;w_age;m_heightincl;m_muacincl	FALSE
TG.16.0_37.3.	14–21d	Prenatal	0.307111	-0.773384	1.38761	0.858083	0.5746	0.841989	primiparity;code_bep_n;m_bmiincl;m_hbincl;ga_days_incl;GWG;w_age;m_heightincl;m_muacincl	FALSE	TRUE	FALSE	0.762238
TG.16.0_38.1.	14–21d	Prenatal	1.64879	-0.776602	4.07418	4	0.180898	0.73692	primiparity;m_bmiincl;ga_days_incl	FALSE
TG.16.0_38.2.	14–21d	Prenatal	1.97173	-1.97151	5.91497	4	0.324132	0.742994	primiparity;m_bmiincl;m_hbincl;ga_days_incl;GWG;w_age;m_muacincl	FALSE
TG.16.0_38.3.	14–21d	Prenatal	2.28969	-3.08582	7.66519	4	0.400686	0.772164	primiparity;m_bmiincl;ga_days_incl;GWG;w_age;m_heightincl;m_muacincl	FALSE
TG.16.0_38.4.	14–21d	Prenatal	2.25985	-3.63937	8.15908	4	0.449634	0.772164	primiparity;code_bep_n;m_bmiincl;m_hbincl;GWG;w_age;m_heightincl;m_muacincl	FALSE
TG.16.0_38.5.	14–21d	Prenatal	0.843339	-2.75336	4.44004	2.13605	0.64327	0.860755	primiparity;code_bep_n;m_bmiincl;m_hbincl;ga_days_incl;GWG;w_age;m_heightincl;m_muacincl	FALSE	TRUE	FALSE	0.85
TG.16.0_38.6.	14–21d	Prenatal	-0.195686	-2.15412	1.76275	-0.340211	0.843489	0.941702	primiparity;code_bep_n;m_bmiincl;m_hbincl;ga_days_incl;GWG;w_age;m_heightincl;m_muacincl	FALSE
TG.16.0_38.7.	14–21d	Prenatal	-0.00825673	-0.482488	0.465975	0.106481	0.972554	0.989021	primiparity;code_bep_n;m_bmiincl;m_hbincl;ga_days_incl;GWG;w_age;m_heightincl;m_muacincl	FALSE
TG.16.0_40.6.	14–21d	Prenatal	-0.00612917	-1.62203	1.60977	0.111551	0.99402	0.994114	primiparity;code_bep_n;m_bmiincl;m_hbincl;ga_days_incl;GWG;w_age;m_heightincl;m_muacincl	FALSE
TG.16.0_40.7.	14–21d	Prenatal	0.0393806	-1.99121	2.06998	0.220012	0.96943	0.989021	primiparity;code_bep_n;m_bmiincl;m_hbincl;ga_days_incl;GWG;w_age;m_heightincl;m_muacincl	FALSE
TG.16.0_40.8.	14–21d	Prenatal	-0.0320972	-1.26	1.1958	0.0496628	0.958804	0.989021	primiparity;code_bep_n;m_bmiincl;m_hbincl;ga_days_incl;GWG;w_age;m_heightincl;m_muacincl	FALSE
TG.16.1_28.0.	14–21d	Prenatal	-13.842	-27.3117	-0.372281	-4	0.044088	0.73692	m_bmiincl;GWG;m_heightincl;m_muacincl	TRUE
TG.16.1_30.1.	14–21d	Prenatal	-1.144	-11.145	8.85703	-2.60029	0.821189	0.927755	primiparity;code_bep_n;m_bmiincl;m_hbincl;ga_days_incl;GWG;w_age;m_heightincl;m_muacincl	FALSE
TG.16.1_32.0.	14–21d	Prenatal	-2.32944	-8.65928	4.00041	-4	0.467672	0.781621	primiparity;m_bmiincl;w_age;m_heightincl;m_muacincl	FALSE	FALSE	TRUE	0.762238
TG.16.1_32.1.	14–21d	Prenatal	-5.88261	-16.6701	4.90485	-4	0.282421	0.73692	primiparity;m_bmiincl;m_hbincl;GWG;w_age;m_heightincl;m_muacincl	FALSE
TG.16.1_32.2.	14–21d	Prenatal	-3.65902	-9.09515	1.77712	-4	0.185195	0.73692	m_bmiincl;ga_days_incl;m_heightincl;m_muacincl	FALSE	TRUE	FALSE	0.762238
TG.16.1_33.1.	14–21d	Prenatal	-0.0488023	-0.45777	0.360166	0.00985026	0.813617	0.926272	primiparity;code_bep_n;m_bmiincl;ga_days_incl;GWG;w_age;m_heightincl;m_muacincl	FALSE
TG.16.1_34.0.	14–21d	Prenatal	2.1934	-1.85868	6.24547	4	0.286054	0.73692	m_bmiincl;m_heightincl;m_muacincl	FALSE
TG.16.1_34.1.	14–21d	Prenatal	2.08313	-20.2383	24.4046	4	0.853698	0.945241	primiparity;code_bep_n;m_bmiincl;m_hbincl;ga_days_incl;GWG;w_age;m_heightincl;m_muacincl	FALSE
TG.16.1_34.2.	14–21d	Prenatal	-0.896242	-15.8319	14.0394	-2.00981	0.905619	0.973969	code_bep_n;m_bmiincl;m_hbincl;ga_days_incl;GWG;w_age;m_heightincl;m_muacincl	FALSE	TRUE	FALSE	0.762238
TG.16.1_34.3.	14–21d	Prenatal	0.135575	-1.85001	2.12116	0.449268	0.892674	0.969065	primiparity;code_bep_n;m_bmiincl;m_hbincl;ga_days_incl;GWG;w_age;m_heightincl;m_muacincl	FALSE
TG.16.1_36.1.	14–21d	Prenatal	3.72566	-1.25103	8.70235	4	0.140915	0.73692	m_bmiincl;ga_days_incl;GWG;w_age;m_muacincl	FALSE
TG.16.1_36.2.	14–21d	Prenatal	6.61595	-4.24101	17.4729	4	0.230029	0.73692	m_bmiincl;GWG;w_age;m_muacincl	FALSE
TG.16.1_36.3.	14–21d	Prenatal	6.1494	-3.63357	15.9324	4	0.215741	0.73692	m_bmiincl;GWG;w_age;m_heightincl;m_muacincl	FALSE	TRUE	FALSE	0.677686
TG.16.1_36.4.	14–21d	Prenatal	2.71254	-1.80292	7.22799	4	0.236654	0.73692	code_bep_n;m_bmiincl;m_hbincl;ga_days_incl;m_heightincl;m_muacincl	FALSE	TRUE	FALSE	0.677686
TG.16.1_36.5.	14–21d	Prenatal	0.197272	-0.184242	0.578786	0.596308	0.308001	0.742994	primiparity;code_bep_n;m_bmiincl;m_hbincl;ga_days_incl;w_age;m_heightincl	FALSE
TG.16.1_38.3.	14–21d	Prenatal	0.332465	-0.295359	0.96029	0.918507	0.296527	0.742994	primiparity;m_bmiincl;GWG;w_age;m_heightincl;m_muacincl	FALSE
TG.16.1_38.4.	14–21d	Prenatal	0.311986	-0.349222	0.973194	0.8697	0.352094	0.746736	primiparity;m_bmiincl;w_age;m_heightincl;m_muacincl	FALSE	TRUE	FALSE	0.762238
TG.16.1_38.5.	14–21d	Prenatal	0.132931	-0.27859	0.544452	0.442967	0.52365	0.827837	primiparity;code_bep_n;m_bmiincl;m_hbincl;ga_days_incl;GWG;m_heightincl;m_muacincl	FALSE	TRUE	FALSE	0.677686
TG.17.0_32.1.	14–21d	Prenatal	-0.375258	-1.55619	0.805677	-0.768176	0.530472	0.827837	m_bmiincl;GWG;w_age;m_heightincl;m_muacincl	FALSE
TG.17.0_34.1.	14–21d	Prenatal	1.16609	-0.814167	3.14634	2.90524	0.246048	0.73692	m_heightincl;m_muacincl	FALSE	TRUE	FALSE	0.677686
TG.17.0_34.2.	14–21d	Prenatal	0.899393	-0.847702	2.64649	2.26964	0.310108	0.742994	primiparity;code_bep_n;m_bmiincl;m_hbincl;ga_days_incl;GWG;w_age;m_heightincl	FALSE	TRUE	FALSE	0.762238
TG.17.0_34.3.	14–21d	Prenatal	0.0995466	-0.156609	0.355702	0.363403	0.443093	0.772164	primiparity;code_bep_n;m_bmiincl;m_hbincl;ga_days_incl;GWG;w_age;m_heightincl;m_muacincl	FALSE	FALSE	TRUE	0.762238
TG.17.0_36.3.	14–21d	Prenatal	1.78416	0.081916	3.4864	4	0.0400966	0.73692		TRUE
TG.17.0_36.4.	14–21d	Prenatal	0.453592	-0.301113	1.2083	1.20718	0.236385	0.73692	primiparity;code_bep_n;m_bmiincl;m_hbincl;ga_days_incl;GWG;w_age;m_heightincl	FALSE
TG.17.1_32.1.	14–21d	Prenatal	-0.2212	-1.05052	0.608123	-0.401018	0.598431	0.851614	primiparity;m_bmiincl;w_age;m_heightincl;m_muacincl	FALSE	TRUE	FALSE	0.677686
TG.17.1_34.1.	14–21d	Prenatal	0.674533	-1.10295	2.45202	1.73374	0.453907	0.772164	primiparity;code_bep_n;m_bmiincl;m_hbincl;GWG;m_heightincl;m_muacincl	FALSE
TG.17.1_34.2.	14–21d	Prenatal	0.312486	-1.02475	1.64972	0.870893	0.644416	0.860755	primiparity;code_bep_n;m_hbincl;ga_days_incl;GWG;w_age;m_heightincl;m_muacincl	FALSE
TG.17.1_34.3.	14–21d	Prenatal	0.0253069	-0.154223	0.204836	0.186471	0.780623	0.914503	primiparity;code_bep_n;m_bmiincl;m_hbincl;ga_days_incl;GWG;w_age;m_heightincl;m_muacincl	FALSE
TG.17.1_36.3.	14–21d	Prenatal	0.964444	-0.198754	2.12764	2.42467	0.103308	0.73692	primiparity;code_bep_n;m_hbincl;m_heightincl	FALSE	TRUE	FALSE	0.677686
TG.17.1_36.4.	14–21d	Prenatal	0.322883	-0.20993	0.855697	0.895672	0.232528	0.73692	primiparity;code_bep_n;m_bmiincl;m_hbincl;ga_days_incl;GWG;w_age;m_heightincl;m_muacincl	FALSE	TRUE	FALSE	0.677686
TG.17.1_36.5.	14–21d	Prenatal	0.0265545	-0.0167735	0.0698825	0.189445	0.227303	0.73692	primiparity;code_bep_n;m_bmiincl;m_hbincl;ga_days_incl;GWG;w_age;m_heightincl;m_muacincl	FALSE
TG.17.1_38.5.	14–21d	Prenatal	0.00400975	-0.00191931	0.0099388	0.135715	0.183085	0.73692	code_bep_n;m_bmiincl;m_hbincl;ga_days_incl;GWG;w_age;m_heightincl;m_muacincl	FALSE
TG.17.2_34.2.	14–21d	Prenatal	0.072343	-0.248835	0.39352	0.29857	0.656384	0.862232	primiparity;code_bep_n;m_bmiincl;m_hbincl;ga_days_incl;GWG;w_age;m_heightincl;m_muacincl	FALSE
TG.17.2_34.3.	14–21d	Prenatal	0.0216318	-0.0400211	0.0832848	0.177713	0.488542	0.795028	primiparity;code_bep_n;m_bmiincl;m_hbincl;ga_days_incl;GWG;w_age;m_heightincl;m_muacincl	FALSE
TG.17.2_36.2.	14–21d	Prenatal	0.151125	-0.016708	0.318958	0.486327	0.0771431	0.73692	code_bep_n;m_bmiincl;m_hbincl;ga_days_incl;GWG;w_age;m_heightincl	FALSE
TG.17.2_36.3.	14–21d	Prenatal	0.0795801	-0.0276534	0.186814	0.315818	0.144331	0.73692	primiparity;code_bep_n;m_bmiincl;m_hbincl;ga_days_incl;GWG;w_age;m_heightincl;m_muacincl	FALSE
TG.17.2_36.4.	14–21d	Prenatal	0.113744	-0.0523345	0.279823	0.39724	0.177609	0.73692	primiparity;code_bep_n;m_bmiincl;m_hbincl;ga_days_incl;GWG;w_age;m_heightincl;m_muacincl	FALSE
TG.17.2_38.5.	14–21d	Prenatal	0.0145638	-0.0192454	0.0483731	0.160868	0.395473	0.770132	primiparity;code_bep_n;m_hbincl;GWG;m_heightincl	FALSE
TG.17.2_38.6.	14–21d	Prenatal	0.036911	0.00128926	0.0725327	0.214127	0.0423847	0.73692	code_bep_n;m_bmiincl;m_hbincl;ga_days_incl;m_heightincl;m_muacincl	TRUE
TG.18.0_30.0.	14–21d	Prenatal	8.72519	-4.24417	21.6946	4	0.185414	0.73692	primiparity;m_bmiincl;ga_days_incl;m_muacincl	FALSE
TG.18.0_30.1.	14–21d	Prenatal	17.41	-23.6334	58.4534	4	0.402633	0.772164	primiparity;m_bmiincl;ga_days_incl;GWG;w_age;m_heightincl;m_muacincl	FALSE	TRUE	FALSE	0.677686
TG.18.0_32.0.	14–21d	Prenatal	10.1629	3.26924	17.0566	4	0.00417972	0.428977		TRUE
TG.18.0_32.1.	14–21d	Prenatal	7.85648	-26.4857	42.1986	4	0.651382	0.860755	primiparity;code_bep_n;m_bmiincl;ga_days_incl;GWG;w_age;m_heightincl;m_muacincl	FALSE
TG.18.0_32.2.	14–21d	Prenatal	-2.64369	-24.283	18.9956	-4	0.809254	0.926272	primiparity;code_bep_n;m_bmiincl;m_hbincl;ga_days_incl;GWG;w_age;m_heightincl;m_muacincl	FALSE	FALSE	TRUE	0.85
TG.18.0_34.2.	14–21d	Prenatal	42.6955	5.20743	80.1837	4	0.0259323	0.73692		TRUE
TG.18.0_34.3.	14–21d	Prenatal	3.6868	-0.61546	7.98905	4	0.0923643	0.73692	m_bmiincl;GWG;m_muacincl	FALSE
TG.18.0_36.1.	14–21d	Prenatal	28.2893	-28.8483	85.4268	4	0.328968	0.742994	primiparity;GWG;w_age;m_heightincl	FALSE
TG.18.0_36.2.	14–21d	Prenatal	48.5985	-31.3223	128.519	4	0.230974	0.73692	primiparity;ga_days_incl;GWG;w_age;m_heightincl;m_muacincl	FALSE	TRUE	TRUE	0.677686
TG.18.0_36.3.	14–21d	Prenatal	31.7049	-12.2119	75.6216	4	0.155495	0.73692	primiparity;ga_days_incl;GWG;w_age;m_heightincl;m_muacincl	FALSE
TG.18.0_36.4.	14–21d	Prenatal	12.8581	-1.84918	27.5655	4	0.0860473	0.73692	GWG	FALSE
TG.18.0_36.5.	14–21d	Prenatal	1.3356	-0.00120847	2.6724	3.30922	0.0502043	0.73692	m_bmiincl	FALSE	FALSE	TRUE	0.85
TG.18.0_38.6.	14–21d	Prenatal	0.524292	-0.410141	1.45873	1.37568	0.268833	0.73692	code_bep_n;m_bmiincl;m_hbincl;ga_days_incl;GWG;w_age;m_heightincl	FALSE
TG.18.0_38.7.	14–21d	Prenatal	0.0513531	-0.0438365	0.146543	0.248546	0.287556	0.73692	primiparity;code_bep_n;m_bmiincl;m_hbincl;ga_days_incl;GWG;w_age;m_heightincl;m_muacincl	FALSE
TG.18.1_26.0.	14–21d	Prenatal	-72.0702	-188.602	44.4618	-4	0.223122	0.73692	primiparity;code_bep_n;m_bmiincl;m_hbincl;ga_days_incl;GWG;w_age;m_heightincl;m_muacincl	FALSE
TG.18.1_28.1.	14–21d	Prenatal	26.2252	-13.5306	65.9809	4	0.194025	0.73692	primiparity;m_bmiincl;ga_days_incl;GWG;w_age;m_muacincl	FALSE
TG.18.1_30.0.	14–21d	Prenatal	-43.3204	-128.422	41.7813	-4	0.315521	0.742994	primiparity;code_bep_n;m_bmiincl;m_hbincl;ga_days_incl;GWG;w_age;m_muacincl	FALSE
TG.18.1_30.1.	14–21d	Prenatal	50.2571	-58.6772	159.191	4	0.362815	0.754428	primiparity;code_bep_n;m_bmiincl;ga_days_incl;GWG;w_age;m_heightincl;m_muacincl	FALSE
TG.18.1_30.2.	14–21d	Prenatal	22.775	-47.5526	93.1027	4	0.522601	0.827837	primiparity;m_bmiincl;ga_days_incl;GWG;w_age;m_heightincl;m_muacincl	FALSE
TG.18.1_31.0.	14–21d	Prenatal	0.254403	-2.22188	2.73069	0.732466	0.839138	0.941702	primiparity;code_bep_n;m_bmiincl;m_hbincl;ga_days_incl;GWG;w_age;m_heightincl;m_muacincl	FALSE
TG.18.1_32.0.	14–21d	Prenatal	21.6507	-48.4875	91.789	4	0.542262	0.830361	primiparity;code_bep_n;m_bmiincl;ga_days_incl;w_age;m_muacincl	FALSE
TG.18.1_32.1.	14–21d	Prenatal	5.96742	-119.95	131.884	4	0.925389	0.980228	primiparity;code_bep_n;m_bmiincl;m_hbincl;ga_days_incl;GWG;w_age;m_heightincl;m_muacincl	FALSE
TG.18.1_32.2.	14–21d	Prenatal	-15.5205	-82.3383	51.2973	-4	0.646377	0.860755	primiparity;code_bep_n;m_bmiincl;m_hbincl;ga_days_incl;GWG;w_age;m_heightincl;m_muacincl	FALSE
TG.18.1_32.3.	14–21d	Prenatal	0.35821	-6.39388	7.1103	0.979863	0.916515	0.980228	primiparity;code_bep_n;m_bmiincl;ga_days_incl;GWG;w_age;m_heightincl;m_muacincl	FALSE
TG.18.1_33.0.	14–21d	Prenatal	2.01383	-1.05811	5.08576	4	0.196858	0.73692	m_bmiincl;m_muacincl	FALSE
TG.18.1_33.1.	14–21d	Prenatal	2.56073	-2.25077	7.37223	4	0.294143	0.742994	m_bmiincl;ga_days_incl;GWG;w_age;m_muacincl	FALSE
TG.18.1_33.2.	14–21d	Prenatal	1.20802	-0.70187	3.11791	3.00517	0.212924	0.73692	code_bep_n;m_bmiincl;m_hbincl;m_heightincl;m_muacincl	FALSE
TG.18.1_33.3.	14–21d	Prenatal	0.150111	-0.125957	0.42618	0.483912	0.283893	0.73692	GWG;m_heightincl;m_muacincl	FALSE
TG.18.1_34.1.	14–21d	Prenatal	175.312	-109.688	460.312	4	0.225665	0.73692	primiparity;code_bep_n;ga_days_incl;w_age;m_heightincl;m_muacincl	FALSE
TG.18.1_34.2.	14–21d	Prenatal	90.9846	-66.3214	248.291	4	0.254456	0.73692	primiparity;w_age;m_heightincl;m_muacincl	FALSE
TG.18.1_34.3.	14–21d	Prenatal	17.2542	-5.55743	40.0658	4	0.136892	0.73692	m_bmiincl;GWG;m_heightincl;m_muacincl	FALSE
TG.18.1_34.4.	14–21d	Prenatal	0.379975	-1.99945	2.7594	1.03174	0.752384	0.904658	primiparity;code_bep_n;m_bmiincl;m_hbincl;ga_days_incl;GWG;w_age;m_heightincl;m_muacincl	FALSE
TG.18.1_35.2.	14–21d	Prenatal	4.22535	0.283694	8.167	4	0.0358466	0.73692		TRUE
TG.18.1_35.3.	14–21d	Prenatal	1.21875	0.0150251	2.42248	3.03076	0.0472504	0.73692	m_heightincl	TRUE
TG.18.1_36.0.	14–21d	Prenatal	17.9517	-5.17776	41.0812	4	0.127028	0.73692	ga_days_incl;GWG;m_heightincl	FALSE
TG.18.1_36.1.	14–21d	Prenatal	61.0828	-43.985	166.151	4	0.252015	0.73692	primiparity;ga_days_incl;GWG;w_age;m_heightincl	FALSE
TG.18.1_36.2.	14–21d	Prenatal	78.0788	-10.583	166.741	4	0.08379	0.73692	primiparity;ga_days_incl;GWG;w_age;m_heightincl;m_muacincl	FALSE
TG.18.1_36.3.	14–21d	Prenatal	124.49	0.484465	248.495	4	0.0491256	0.73692	primiparity;ga_days_incl;GWG;w_age;m_muacincl	TRUE
TG.18.1_36.4.	14–21d	Prenatal	59.9374	-3.25857	123.133	4	0.0628373	0.73692	GWG;m_muacincl	FALSE
TG.18.1_36.5.	14–21d	Prenatal	5.92088	-0.0629063	11.9047	4	0.0524196	0.73692	m_bmiincl;GWG	FALSE	FALSE	TRUE	0.762238
TG.18.1_36.5.	14–21d	Prenatal	5.92088	-0.0629063	11.9047	4	0.0524196	0.73692	m_bmiincl;GWG	FALSE	FALSE	TRUE	0.85
TG.18.1_36.6.	14–21d	Prenatal	0.0780777	-1.05443	1.21059	0.312237	0.891639	0.969065	primiparity;code_bep_n;m_bmiincl;m_hbincl;ga_days_incl;GWG;w_age;m_heightincl;m_muacincl	FALSE	TRUE	FALSE	0.677686
TG.18.1_36.6.	14–21d	Prenatal	0.0780777	-1.05443	1.21059	0.312237	0.891639	0.969065	primiparity;code_bep_n;m_bmiincl;m_hbincl;ga_days_incl;GWG;w_age;m_heightincl;m_muacincl	FALSE	TRUE	FALSE	0.85
TG.18.1_38.5.	14–21d	Prenatal	3.64842	-1.63445	8.93129	4	0.17411	0.73692	primiparity;GWG;m_muacincl	FALSE
TG.18.1_38.6.	14–21d	Prenatal	0.887306	-1.47892	3.25354	2.24083	0.459214	0.777147	primiparity;code_bep_n;m_bmiincl;m_hbincl;ga_days_incl;GWG;w_age;m_heightincl;m_muacincl	FALSE
TG.18.1_38.7.	14–21d	Prenatal	0.317889	-0.106426	0.742204	0.883769	0.140585	0.73692	primiparity;code_bep_n;m_bmiincl;m_hbincl;ga_days_incl;GWG;w_age;m_heightincl;m_muacincl	FALSE
TG.18.2_28.0.	14–21d	Prenatal	-81.8185	-186.559	22.9218	-4	0.124604	0.73692	m_bmiincl;GWG;m_heightincl;m_muacincl	FALSE
TG.18.2_30.0.	14–21d	Prenatal	-55.3857	-127.81	17.0386	-4	0.132654	0.73692	m_bmiincl;m_heightincl;m_muacincl	FALSE	FALSE	TRUE	0.85
TG.18.2_30.1.	14–21d	Prenatal	22.3823	-53.2653	98.0298	4	0.559077	0.830918	primiparity;m_bmiincl;ga_days_incl;GWG;w_age;m_heightincl;m_muacincl	FALSE
TG.18.2_31.0.	14–21d	Prenatal	-0.244151	-1.56435	1.07605	-0.455715	0.714856	0.891563	primiparity;code_bep_n;m_bmiincl;m_hbincl;ga_days_incl;GWG;w_age;m_heightincl;m_muacincl	FALSE
TG.18.2_32.0.	14–21d	Prenatal	6.85298	-48.5548	62.2608	4	0.80694	0.926272	primiparity;code_bep_n;m_bmiincl;m_hbincl;ga_days_incl;GWG;w_age;m_heightincl;m_muacincl	FALSE	TRUE	TRUE	0.85
TG.18.2_32.1.	14–21d	Prenatal	-22.683	-98.0834	52.7173	-4	0.552543	0.830918	primiparity;m_bmiincl;GWG;w_age;m_heightincl;m_muacincl	FALSE
TG.18.2_32.2.	14–21d	Prenatal	-20.5783	-86.2211	45.0644	-4	0.536006	0.829222	code_bep_n;m_bmiincl;ga_days_incl;GWG;m_heightincl;m_muacincl	FALSE	TRUE	FALSE	0.85
TG.18.2_33.0.	14–21d	Prenatal	1.3073	-1.1826	3.7972	3.24179	0.300593	0.742994	primiparity;code_bep_n;m_bmiincl;m_hbincl;ga_days_incl;GWG;w_age;m_heightincl;m_muacincl	FALSE
TG.18.2_33.1.	14–21d	Prenatal	0.947636	-2.49409	4.38937	2.38462	0.586616	0.845754	primiparity;code_bep_n;m_bmiincl;m_hbincl;ga_days_incl;GWG;w_age;m_heightincl;m_muacincl	FALSE
TG.18.2_33.2.	14–21d	Prenatal	0.522469	-1.1104	2.15533	1.37133	0.527575	0.827837	primiparity;code_bep_n;m_bmiincl;m_hbincl;ga_days_incl;GWG;w_age;m_heightincl	FALSE	TRUE	FALSE	0.677686
TG.18.2_34.0.	14–21d	Prenatal	61.0011	5.01625	116.986	4	0.0329628	0.73692	primiparity	TRUE	TRUE	FALSE	0.677686
TG.18.2_34.0.	14–21d	Prenatal	61.0011	5.01625	116.986	4	0.0329628	0.73692	primiparity	TRUE	TRUE	FALSE	0.85
TG.18.2_34.1.	14–21d	Prenatal	71.9771	-78.7143	222.668	4	0.346249	0.74359	primiparity;w_age;m_heightincl;m_muacincl	FALSE
TG.18.2_34.2.	14–21d	Prenatal	49.1095	-90.5383	188.757	4	0.48755	0.795028	primiparity;code_bep_n;m_bmiincl;m_hbincl;ga_days_incl;GWG;w_age;m_heightincl;m_muacincl	FALSE
TG.18.2_34.3.	14–21d	Prenatal	7.23368	-7.39197	21.8593	4	0.32945	0.742994	primiparity;code_bep_n;m_hbincl;ga_days_incl;m_heightincl;m_muacincl	FALSE
TG.18.2_34.4.	14–21d	Prenatal	-0.168476	-1.56688	1.22992	-0.275362	0.811859	0.926272	primiparity;code_bep_n;m_bmiincl;m_hbincl;ga_days_incl;GWG;w_age;m_heightincl	FALSE
TG.18.2_35.1.	14–21d	Prenatal	3.13074	-1.37328	7.63475	4	0.171351	0.73692	code_bep_n;m_hbincl;ga_days_incl;m_heightincl	FALSE
TG.18.2_35.2.	14–21d	Prenatal	1.85313	-0.722934	4.4292	4	0.156957	0.73692	primiparity;code_bep_n;m_bmiincl;m_hbincl;ga_days_incl;w_age;m_heightincl	FALSE
TG.18.2_35.3.	14–21d	Prenatal	0.68264	-0.391804	1.75708	1.75306	0.210821	0.73692	primiparity;code_bep_n;m_bmiincl;m_hbincl;ga_days_incl;GWG;w_age;m_heightincl;m_muacincl	FALSE
TG.18.2_36.0.	14–21d	Prenatal	8.53649	-4.44461	21.5176	4	0.19542	0.73692	primiparity;ga_days_incl;GWG;m_heightincl;m_muacincl	FALSE
TG.18.2_36.1.	14–21d	Prenatal	41.5105	-7.5827	90.6038	4	0.0967239	0.73692	primiparity;GWG;w_age;m_muacincl	FALSE
TG.18.2_36.2.	14–21d	Prenatal	77.377	-8.1286	162.883	4	0.0757102	0.73692	primiparity;GWG;m_muacincl	FALSE
TG.18.2_36.3.	14–21d	Prenatal	73.1472	-27.7439	174.038	4	0.15378	0.73692	primiparity;GWG;m_heightincl;m_muacincl	FALSE
TG.18.2_36.4.	14–21d	Prenatal	49.2202	-11.463	109.903	4	0.110951	0.73692	code_bep_n;m_bmiincl;m_heightincl	FALSE
TG.18.2_36.5.	14–21d	Prenatal	3.38872	-0.252479	7.02993	4	0.0678469	0.73692	primiparity;code_bep_n;m_bmiincl;m_hbincl;ga_days_incl;w_age;m_heightincl;m_muacincl	FALSE
TG.18.2_38.4.	14–21d	Prenatal	3.8801	-2.21964	9.97984	4	0.210347	0.73692	primiparity;m_hbincl;m_heightincl;m_muacincl	FALSE
TG.18.2_38.5.	14–21d	Prenatal	2.13641	-0.932902	5.20572	4	0.170753	0.73692	code_bep_n;m_bmiincl;m_hbincl;ga_days_incl;m_heightincl	FALSE
TG.18.2_38.6.	14–21d	Prenatal	0.652005	-1.14237	2.44638	1.68005	0.473222	0.786931	primiparity;code_bep_n;m_bmiincl;m_hbincl;ga_days_incl;GWG;w_age;m_heightincl;m_muacincl	FALSE
TG.18.3_30.0.	14–21d	Prenatal	-1.30739	-4.75	2.13522	-2.98968	0.453602	0.772164	m_bmiincl;GWG;w_age;m_heightincl;m_muacincl	FALSE	TRUE	TRUE	0.762238
TG.18.3_30.0.	14–21d	Prenatal	-1.30739	-4.75	2.13522	-2.98968	0.453602	0.772164	m_bmiincl;GWG;w_age;m_heightincl;m_muacincl	FALSE	FALSE	TRUE	0.85
TG.18.3_32.0.	14–21d	Prenatal	0.855906	-1.78221	3.49402	2.166	0.521886	0.827837	m_bmiincl;m_hbincl;w_age;m_heightincl;m_muacincl	FALSE	TRUE	FALSE	0.762238
TG.18.3_32.1.	14–21d	Prenatal	0.169834	-5.20179	5.54146	0.530915	0.950187	0.989021	primiparity;code_bep_n;m_bmiincl;m_hbincl;GWG;w_age;m_heightincl;m_muacincl	FALSE	FALSE	TRUE	0.762238
TG.18.3_32.1.	14–21d	Prenatal	0.169834	-5.20179	5.54146	0.530915	0.950187	0.989021	primiparity;code_bep_n;m_bmiincl;m_hbincl;GWG;w_age;m_heightincl;m_muacincl	FALSE	FALSE	TRUE	0.85
TG.18.3_33.2.	14–21d	Prenatal	0.0155863	-0.0199906	0.0511632	0.163305	0.387447	0.764563	primiparity;code_bep_n;m_bmiincl;m_hbincl;ga_days_incl;m_heightincl;m_muacincl	FALSE
TG.18.3_34.0.	14–21d	Prenatal	3.13734	0.423085	5.85159	4	0.0238372	0.73692		TRUE
TG.18.3_34.1.	14–21d	Prenatal	9.78858	-2.75289	22.33	4	0.124938	0.73692	m_heightincl;m_muacincl	FALSE	TRUE	TRUE	0.762238
TG.18.3_34.1.	14–21d	Prenatal	9.78858	-2.75289	22.33	4	0.124938	0.73692	m_heightincl;m_muacincl	FALSE	TRUE	TRUE	0.85
TG.18.3_34.2.	14–21d	Prenatal	4.15062	-1.56453	9.86576	4	0.153072	0.73692	primiparity;code_bep_n;m_bmiincl;m_hbincl;ga_days_incl;m_heightincl	FALSE
TG.18.3_34.3.	14–21d	Prenatal	0.498261	-0.272524	1.26905	1.31364	0.203087	0.73692	primiparity;GWG;m_heightincl;m_muacincl	FALSE	TRUE	TRUE	0.762238
TG.18.3_34.3.	14–21d	Prenatal	0.498261	-0.272524	1.26905	1.31364	0.203087	0.73692	primiparity;GWG;m_heightincl;m_muacincl	FALSE	TRUE	TRUE	0.85
TG.18.3_35.2.	14–21d	Prenatal	0.170652	-0.0122874	0.353591	0.532865	0.0672231	0.73692	primiparity;m_bmiincl;m_hbincl;m_heightincl	FALSE
TG.18.3_36.1.	14–21d	Prenatal	3.37547	0.345759	6.40518	4	0.0292844	0.73692	GWG	TRUE	TRUE	FALSE	0.85
TG.18.3_36.2.	14–21d	Prenatal	8.5554	1.60118	15.5096	4	0.0163116	0.73692	GWG	TRUE	FALSE	TRUE	0.762238
TG.18.3_36.2.	14–21d	Prenatal	8.5554	1.60118	15.5096	4	0.0163116	0.73692	GWG	TRUE	TRUE	TRUE	0.85
TG.18.3_36.3.	14–21d	Prenatal	6.18583	0.735737	11.6359	4	0.0264404	0.73692	GWG	TRUE	FALSE	TRUE	0.762238
TG.18.3_36.3.	14–21d	Prenatal	6.18583	0.735737	11.6359	4	0.0264404	0.73692	GWG	TRUE	FALSE	TRUE	0.85
TG.18.3_36.4.	14–21d	Prenatal	2.33313	0.194035	4.47223	4	0.0327903	0.73692	m_bmiincl;m_heightincl	TRUE	FALSE	TRUE	0.762238
TG.18.3_36.4.	14–21d	Prenatal	2.33313	0.194035	4.47223	4	0.0327903	0.73692	m_bmiincl;m_heightincl	TRUE	TRUE	TRUE	0.85
TG.18.3_38.5.	14–21d	Prenatal	0.145909	-0.0172748	0.309093	0.473897	0.0792189	0.73692	code_bep_n;m_bmiincl;m_hbincl;ga_days_incl;m_heightincl	FALSE	FALSE	TRUE	0.762238
TG.18.3_38.5.	14–21d	Prenatal	0.145909	-0.0172748	0.309093	0.473897	0.0792189	0.73692	code_bep_n;m_bmiincl;m_hbincl;ga_days_incl;m_heightincl	FALSE	TRUE	TRUE	0.85
TG.18.3_38.6.	14–21d	Prenatal	0.0526481	-0.0288464	0.134143	0.251632	0.203294	0.73692	primiparity;code_bep_n;m_bmiincl;m_hbincl;ga_days_incl;GWG;w_age;m_heightincl;m_muacincl	FALSE
TG.20.0_32.3.	14–21d	Prenatal	0.325982	-0.208413	0.860377	0.903056	0.229571	0.73692	primiparity;m_heightincl;m_muacincl	FALSE	TRUE	FALSE	0.85
TG.20.0_32.4.	14–21d	Prenatal	0.376062	-0.277642	1.02977	1.02241	0.256945	0.73692	primiparity;code_bep_n;m_bmiincl;m_hbincl;ga_days_incl;GWG;w_age;m_heightincl	FALSE	TRUE	FALSE	0.762238
TG.20.0_34.1.	14–21d	Prenatal	1.44805	0.285266	2.61083	3.57722	0.0150757	0.73692	ga_days_incl;m_heightincl	TRUE
TG.20.1_26.1.	14–21d	Prenatal	0.0145738	-0.300782	0.32993	0.160891	0.927243	0.980228	primiparity;code_bep_n;m_hbincl;ga_days_incl;GWG;w_age;m_heightincl;m_muacincl	FALSE
TG.20.1_30.1.	14–21d	Prenatal	0.31512	-2.25773	2.88797	0.87717	0.808794	0.926272	primiparity;code_bep_n;m_bmiincl;ga_days_incl;GWG;w_age;m_heightincl;m_muacincl	FALSE	TRUE	FALSE	0.677686
TG.20.1_32.1.	14–21d	Prenatal	-0.648747	-3.59223	2.29473	-1.41997	0.663345	0.868806	primiparity;code_bep_n;m_bmiincl;ga_days_incl;GWG;w_age;m_muacincl	FALSE
TG.20.1_32.2.	14–21d	Prenatal	-0.543189	-2.06322	0.976845	-1.1684	0.480632	0.790372	primiparity;m_bmiincl;w_age;m_heightincl;m_muacincl	FALSE	TRUE	FALSE	0.677686
TG.20.1_32.3.	14–21d	Prenatal	0.0376492	-0.124697	0.199996	0.215886	0.646908	0.860755	primiparity;code_bep_n;m_bmiincl;m_hbincl;ga_days_incl;GWG;w_age;m_heightincl;m_muacincl	FALSE
TG.20.1_34.0.	14–21d	Prenatal	1.21469	0.193661	2.23571	3.02106	0.0201053	0.73692	m_bmiincl	TRUE
TG.20.1_34.1.	14–21d	Prenatal	1.56473	-3.70841	6.83787	3.8553	0.557912	0.830918	primiparity;code_bep_n;m_bmiincl;m_hbincl;ga_days_incl;GWG;w_age;m_heightincl;m_muacincl	FALSE
TG.20.1_34.2.	14–21d	Prenatal	1.27151	-1.91473	4.45775	3.15648	0.431019	0.772164	primiparity;code_bep_n;m_bmiincl;m_hbincl;ga_days_incl;GWG;m_heightincl	FALSE
TG.20.1_34.3.	14–21d	Prenatal	0.22237	-0.23382	0.67856	0.656122	0.336427	0.742994	primiparity;m_bmiincl;m_hbincl;w_age;m_heightincl;m_muacincl	FALSE
TG.20.2_32.0.	14–21d	Prenatal	0.314313	-1.69275	2.32138	0.875247	0.757035	0.904658	primiparity;code_bep_n;m_bmiincl;m_hbincl;GWG;w_age;m_heightincl;m_muacincl	FALSE
TG.20.2_32.1.	14–21d	Prenatal	-0.956497	-4.16643	2.25344	-2.15342	0.556264	0.830918	primiparity;code_bep_n;m_bmiincl;m_hbincl;ga_days_incl;GWG;w_age;m_heightincl;m_muacincl	FALSE
TG.20.2_34.1.	14–21d	Prenatal	2.94748	-3.76289	9.65785	4	0.386191	0.764563	primiparity;m_bmiincl;ga_days_incl;GWG;w_age;m_heightincl;m_muacincl	FALSE
TG.20.2_34.2.	14–21d	Prenatal	1.41981	-3.21093	6.05054	3.50992	0.54491	0.830918	primiparity;code_bep_n;m_bmiincl;m_hbincl;ga_days_incl;GWG;w_age;m_heightincl;m_muacincl	FALSE
TG.20.2_34.3.	14–21d	Prenatal	0.263881	-0.572296	1.10006	0.755053	0.533246	0.827837	primiparity;code_bep_n;m_bmiincl;m_hbincl;ga_days_incl;GWG;m_heightincl;m_muacincl	FALSE
TG.20.2_34.4.	14–21d	Prenatal	0.00482121	-0.0267412	0.0363836	0.137649	0.762827	0.904658	primiparity;code_bep_n;m_bmiincl;m_hbincl;ga_days_incl;GWG;m_heightincl;m_muacincl	FALSE
TG.20.2_36.5.	14–21d	Prenatal	0.0704859	-0.0591967	0.200169	0.294144	0.284044	0.73692	code_bep_n;m_bmiincl;m_hbincl;ga_days_incl;m_heightincl;m_muacincl	FALSE
TG.20.3_32.0.	14–21d	Prenatal	-1.00832	-3.94766	1.93101	-2.27694	0.498341	0.801678	primiparity;code_bep_n;m_bmiincl;w_age;m_heightincl;m_muacincl	FALSE
TG.20.3_32.1.	14–21d	Prenatal	-1.48179	-5.34216	2.37859	-3.40531	0.448727	0.772164	primiparity;code_bep_n;m_bmiincl;ga_days_incl;GWG;w_age;m_heightincl;m_muacincl	FALSE	TRUE	FALSE	0.85
TG.20.3_32.2.	14–21d	Prenatal	-1.09657	-3.05043	0.857284	-2.48726	0.268722	0.73692	code_bep_n;m_bmiincl;ga_days_incl;GWG;m_heightincl;m_muacincl	FALSE	FALSE	TRUE	0.85
TG.20.3_34.0.	14–21d	Prenatal	1.07096	-0.644164	2.78609	2.67854	0.218812	0.73692	primiparity;m_bmiincl;m_muacincl	FALSE	TRUE	FALSE	0.762238
TG.20.3_34.1.	14–21d	Prenatal	3.1779	-4.23877	10.5946	4	0.397951	0.771572	primiparity;m_bmiincl;w_age;m_heightincl;m_muacincl	FALSE
TG.20.3_34.2.	14–21d	Prenatal	1.12669	-3.13999	5.39337	2.81135	0.602006	0.853964	primiparity;code_bep_n;m_bmiincl;m_hbincl;ga_days_incl;GWG;w_age;m_heightincl;m_muacincl	FALSE
TG.20.3_34.3.	14–21d	Prenatal	0.0430413	-0.695066	0.781149	0.228737	0.908264	0.974081	primiparity;code_bep_n;m_bmiincl;m_hbincl;ga_days_incl;GWG;w_age;m_heightincl;m_muacincl	FALSE
TG.20.3_36.3.	14–21d	Prenatal	2.61004	-0.71766	5.93774	4	0.123082	0.73692	primiparity;m_bmiincl;GWG;w_age;m_muacincl	FALSE
TG.20.3_36.4.	14–21d	Prenatal	0.767485	-0.473089	2.00806	1.95527	0.223071	0.73692	code_bep_n;m_hbincl;m_heightincl;m_muacincl	FALSE
TG.20.3_36.5.	14–21d	Prenatal	0.0335553	-0.00966812	0.0767788	0.206129	0.12691	0.73692	primiparity;code_bep_n;m_bmiincl;m_hbincl;ga_days_incl;w_age;m_heightincl	FALSE
TG.20.4_30.0.	14–21d	Prenatal	-4.76585	-10.2606	0.728863	-4	0.088515	0.73692	m_bmiincl;GWG;m_heightincl;m_muacincl	FALSE	TRUE	TRUE	0.85
TG.20.4_32.0.	14–21d	Prenatal	-1.8011	-5.4908	1.88859	-4	0.335766	0.742994	primiparity;m_bmiincl;w_age;m_heightincl;m_muacincl	FALSE	TRUE	TRUE	0.85
TG.20.4_32.1.	14–21d	Prenatal	-1.52251	-5.35811	2.31309	-3.50236	0.433413	0.772164	primiparity;code_bep_n;m_bmiincl;m_hbincl;ga_days_incl;GWG;w_age;m_heightincl;m_muacincl	FALSE
TG.20.4_32.2.	14–21d	Prenatal	-1.22764	-3.36702	0.911742	-2.79962	0.258223	0.73692	m_bmiincl;m_heightincl;m_muacincl	FALSE
TG.20.4_33.2.	14–21d	Prenatal	0.0194489	-0.049986	0.0888837	0.17251	0.580188	0.842272	primiparity;code_bep_n;m_bmiincl;m_hbincl;ga_days_incl;w_age;m_heightincl;m_muacincl	FALSE
TG.20.4_34.0.	14–21d	Prenatal	1.34294	-0.565163	3.25104	3.32672	0.166075	0.73692	primiparity;m_bmiincl;w_age;m_muacincl	FALSE
TG.20.4_34.1.	14–21d	Prenatal	4.52298	-2.17186	11.2178	4	0.183564	0.73692	primiparity;m_bmiincl;w_age;m_heightincl;m_muacincl	FALSE
TG.20.4_34.2.	14–21d	Prenatal	2.1871	-2.73634	7.11054	4	0.380846	0.76434	code_bep_n;m_bmiincl;m_hbincl;ga_days_incl;GWG;w_age;m_heightincl;m_muacincl	FALSE
TG.20.4_34.3.	14–21d	Prenatal	0.224487	-0.312761	0.761734	0.661167	0.40968	0.772164	primiparity;code_bep_n;m_bmiincl;m_hbincl;ga_days_incl;w_age;m_heightincl;m_muacincl	FALSE	TRUE	FALSE	0.762238
TG.20.4_36.2.	14–21d	Prenatal	4.48346	-0.981616	9.94854	4	0.106943	0.73692	primiparity;ga_days_incl;GWG;w_age;m_muacincl	FALSE
TG.20.4_36.3.	14–21d	Prenatal	2.84442	-0.573957	6.26279	4	0.102087	0.73692	primiparity;GWG;m_heightincl;m_muacincl	FALSE
TG.20.4_36.4.	14–21d	Prenatal	1.48563	-0.0909404	3.06219	3.66678	0.0645296	0.73692	code_bep_n;m_hbincl;m_heightincl	FALSE
TG.20.4_36.5.	14–21d	Prenatal	0.0659208	-0.0545786	0.18642	0.283265	0.280869	0.73692	primiparity;code_bep_n;m_bmiincl;m_hbincl;ga_days_incl;GWG;w_age;m_heightincl;m_muacincl	FALSE
TG.20.5_34.0.	14–21d	Prenatal	0.0409589	-0.590705	0.672622	0.223774	0.898046	0.970152	primiparity;code_bep_n;m_bmiincl;m_hbincl;ga_days_incl;GWG;w_age;m_heightincl;m_muacincl	FALSE
TG.20.5_34.1.	14–21d	Prenatal	-0.766288	-4.07013	2.53755	-1.7001	0.646863	0.860755	primiparity;code_bep_n;m_bmiincl;m_hbincl;ga_days_incl;GWG;w_age;m_heightincl;m_muacincl	FALSE
TG.20.5_34.2.	14–21d	Prenatal	-0.0854252	-1.80842	1.63757	-0.0774313	0.921955	0.980228	primiparity;code_bep_n;m_bmiincl;m_hbincl;ga_days_incl;GWG;w_age;m_heightincl;m_muacincl	FALSE
TG.20.5_36.2.	14–21d	Prenatal	0.193398	-0.916929	1.30373	0.587075	0.730764	0.901276	primiparity;code_bep_n;m_bmiincl;m_hbincl;ga_days_incl;GWG;w_age;m_heightincl;m_muacincl	FALSE	TRUE	FALSE	0.85
TG.20.5_36.3.	14–21d	Prenatal	0.366746	-0.364392	1.09788	1.00021	0.322585	0.742994	primiparity;code_bep_n;m_bmiincl;m_hbincl;ga_days_incl;GWG;w_age;m_heightincl;m_muacincl	FALSE
TG.22.0_32.4.	14–21d	Prenatal	0.0545367	-0.0230531	0.132126	0.256133	0.166654	0.73692	code_bep_n;m_hbincl;m_heightincl	FALSE
TG.22.1_32.5.	14–21d	Prenatal	0.0266854	-0.00594245	0.0593132	0.189756	0.108024	0.73692	m_bmiincl;GWG;m_heightincl	FALSE
TG.22.2_32.4.	14–21d	Prenatal	0.0871363	-0.0169471	0.19122	0.333826	0.100052	0.73692	m_heightincl	FALSE	TRUE	FALSE	0.85
TG.22.3_30.2.	14–21d	Prenatal	-0.00655469	-0.0299756	0.0168662	0.110537	0.580485	0.842272	primiparity;code_bep_n;m_bmiincl;m_hbincl;ga_days_incl;GWG;w_age;m_heightincl;m_muacincl	FALSE
TG.22.4_32.0.	14–21d	Prenatal	-0.230533	-0.714847	0.25378	-0.423261	0.347832	0.74359	primiparity;m_bmiincl;m_hbincl;ga_days_incl;w_age;m_heightincl;m_muacincl	FALSE
TG.22.4_32.2.	14–21d	Prenatal	-0.237942	-0.600582	0.124698	-0.440917	0.196448	0.73692	m_bmiincl;m_heightincl;m_muacincl	FALSE	TRUE	TRUE	0.85
TG.22.4_34.2.	14–21d	Prenatal	-0.0746487	-0.867962	0.718665	-0.0517483	0.852509	0.945241	primiparity;code_bep_n;m_bmiincl;m_hbincl;ga_days_incl;GWG;m_heightincl;m_muacincl	FALSE
TG.22.5_32.0.	14–21d	Prenatal	-0.626793	-1.87912	0.625533	-1.36765	0.323698	0.742994	primiparity;code_bep_n;m_hbincl;ga_days_incl;GWG;w_age;m_heightincl	FALSE	FALSE	TRUE	0.85
TG.22.5_32.1.	14–21d	Prenatal	-0.695774	-2.2469	0.855355	-1.53205	0.376202	0.76434	primiparity;code_bep_n;m_bmiincl;m_hbincl;ga_days_incl;GWG;w_age;m_heightincl;m_muacincl	FALSE
TG.22.5_34.1.	14–21d	Prenatal	0.113197	-2.1939	2.42029	0.395936	0.922768	0.980228	primiparity;code_bep_n;m_bmiincl;m_hbincl;ga_days_incl;GWG;w_age;m_heightincl	FALSE
TG.22.5_34.2.	14–21d	Prenatal	0.0245003	-1.55105	1.60005	0.184549	0.975486	0.989021	primiparity;code_bep_n;m_bmiincl;m_hbincl;ga_days_incl;GWG;w_age;m_heightincl;m_muacincl	FALSE	TRUE	FALSE	0.677686
TG.22.5_34.3.	14–21d	Prenatal	0.00502328	-0.195775	0.205822	0.13813	0.960573	0.989021	primiparity;code_bep_n;m_bmiincl;m_hbincl;ga_days_incl;GWG;w_age;m_heightincl;m_muacincl	FALSE
TG.22.6_32.0.	14–21d	Prenatal	-1.44072	-4.36444	1.48299	-3.30745	0.331149	0.742994	primiparity;code_bep_n;m_bmiincl;m_hbincl;ga_days_incl;GWG;w_age;m_heightincl;m_muacincl	FALSE	TRUE	FALSE	0.85
TG.22.6_32.1.	14–21d	Prenatal	-1.84973	-6.36448	2.66501	-4	0.418805	0.772164	primiparity;code_bep_n;m_bmiincl;m_hbincl;ga_days_incl;GWG;w_age;m_heightincl;m_muacincl	FALSE
TG.22.6_34.1.	14–21d	Prenatal	-0.122702	-9.20714	8.96174	-0.166272	0.978707	0.989021	primiparity;code_bep_n;m_bmiincl;m_hbincl;ga_days_incl;GWG;w_age;m_heightincl;m_muacincl	FALSE
TG.22.6_34.2.	14–21d	Prenatal	-0.391544	-6.94125	6.15816	-0.806989	0.905967	0.973969	primiparity;code_bep_n;m_bmiincl;m_hbincl;ga_days_incl;GWG;w_age;m_heightincl;m_muacincl	FALSE
TG.22.6_34.3.	14–21d	Prenatal	0.104049	-0.56066	0.768758	0.374133	0.757125	0.904658	primiparity;code_bep_n;m_bmiincl;m_hbincl;ga_days_incl;GWG;w_age;m_heightincl;m_muacincl	FALSE
Hex3Cer.d18.1.16.0.	14–21d	Prenatal	0.0260182	-0.021255	0.0732915	0.188167	0.278045	0.73692	primiparity;m_bmiincl;m_hbincl;ga_days_incl;w_age	FALSE
Choline	14–21d	Prenatal	-9.16128	-40.1691	21.8465	-4	0.559641	0.830918	primiparity;code_bep_n;m_bmiincl;m_hbincl;ga_days_incl;GWG;m_heightincl;m_muacincl	FALSE
C0	14–21d	Postnatal	1.86245	-2.83409	6.55899	4	0.434465	0.706603	code_bep_n;m_bmiincl;m_hbincl;ga_days_incl;m_heightincl;m_muacincl	FALSE
C2	14–21d	Postnatal	0.194293	-3.50857	3.89716	0.589209	0.917537	0.990956	primiparity;code_bep_n;m_bmiincl;m_hbincl;ga_days_incl;GWG;w_age;m_heightincl;m_muacincl	FALSE
C3	14–21d	Postnatal	-0.0514697	-0.265753	0.162813	0.00349324	0.63569	0.842526	primiparity;m_bmiincl;GWG;w_age;m_heightincl;m_muacincl	FALSE
C4	14–21d	Postnatal	-0.0735971	-0.288678	0.141484	-0.049242	0.499903	0.74361	primiparity;code_bep_n;m_bmiincl;ga_days_incl;GWG;w_age;m_heightincl;m_muacincl	FALSE
C6..C4.1.DC.	14–21d	Postnatal	-0.00794212	-0.0466363	0.030752	0.10723	0.685592	0.865114	primiparity;m_bmiincl;m_hbincl;w_age;m_heightincl	FALSE
C12	14–21d	Postnatal	0.0425324	-0.153842	0.238906	0.227524	0.669215	0.863754	primiparity;m_bmiincl;m_hbincl;ga_days_incl;w_age;m_heightincl;m_muacincl	FALSE
C12.1	14–21d	Postnatal	0.00293538	-0.0237653	0.0296361	0.133154	0.828284	0.96366	primiparity;m_bmiincl;m_hbincl;ga_days_incl;w_age;m_heightincl;m_muacincl	FALSE
C14	14–21d	Postnatal	-0.091529	-0.35116	0.168102	-0.0919783	0.487078	0.738098	m_bmiincl;m_hbincl;ga_days_incl;w_age;m_muacincl	FALSE
C14.2.OH	14–21d	Postnatal	-0.00596965	-0.0138844	0.00194513	0.111931	0.138228	0.381201	m_bmiincl;w_age;m_muacincl	FALSE
C18	14–21d	Postnatal	-0.000198665	-0.00528093	0.0048836	0.125685	0.938521	0.990956	primiparity;m_bmiincl;m_hbincl;ga_days_incl;w_age;m_heightincl;m_muacincl	FALSE
TMAO	14–21d	Postnatal	-0.501431	-1.9756	0.97274	-1.06888	0.502439	0.74361	primiparity;code_bep_n;m_bmiincl;m_hbincl;ga_days_incl;GWG;w_age;m_heightincl;m_muacincl	FALSE	TRUE	FALSE	0.677686
X1.Met.His	14–21d	Postnatal	0.0134111	-0.0849247	0.111747	0.158121	0.78787	0.932838	primiparity;code_bep_n;m_bmiincl;m_hbincl;ga_days_incl;GWG;w_age;m_heightincl;m_muacincl	FALSE
X3.Met.His	14–21d	Postnatal	-0.0801018	-0.257028	0.0968244	-0.0647445	0.372328	0.661087	primiparity;code_bep_n;m_bmiincl;m_hbincl;ga_days_incl;GWG;w_age;m_heightincl;m_muacincl	FALSE
AABA	14–21d	Postnatal	0.201457	-0.300068	0.702981	0.60628	0.428521	0.702079	primiparity;code_bep_n;m_bmiincl;m_hbincl;ga_days_incl;GWG;w_age;m_heightincl	FALSE
alpha.AAA	14–21d	Postnatal	0.184538	-0.330078	0.699154	0.565959	0.479655	0.734324	m_bmiincl;ga_days_incl;w_age;m_heightincl	FALSE
Cit	14–21d	Postnatal	0.0546365	-0.884172	0.993445	0.256371	0.908576	0.990956	primiparity;code_bep_n;m_bmiincl;m_hbincl;ga_days_incl;GWG;w_age;m_heightincl;m_muacincl	FALSE
Creatinine	14–21d	Postnatal	0.244372	-2.42362	2.91236	0.708558	0.856582	0.987851	primiparity;code_bep_n;m_bmiincl;m_hbincl;ga_days_incl;GWG;w_age;m_heightincl;m_muacincl	FALSE
Cystine	14–21d	Postnatal	-5.82265	-9.92545	-1.71986	-4	0.00571226	0.0632222	m_heightincl	TRUE
HArg	14–21d	Postnatal	0.00871852	-0.0124397	0.0298768	0.146937	0.416737	0.695606	primiparity;m_bmiincl;ga_days_incl;GWG;w_age;m_muacincl	FALSE
Kynurenine	14–21d	Postnatal	-0.0563834	-0.169541	0.0567741	-0.00821746	0.32632	0.608765	primiparity;code_bep_n;m_bmiincl;m_hbincl;ga_days_incl;GWG;w_age;m_heightincl;m_muacincl	FALSE
Met.SO	14–21d	Postnatal	-0.0759615	-0.192272	0.0403494	-0.0548771	0.198837	0.46465	primiparity;m_bmiincl;w_age;m_heightincl;m_muacincl	FALSE
Orn	14–21d	Postnatal	-0.224953	-1.46586	1.01595	-0.409962	0.720632	0.876604	primiparity;code_bep_n;m_bmiincl;m_hbincl;ga_days_incl;GWG;w_age;m_muacincl	FALSE
ProBetaine	14–21d	Postnatal	0.0415536	-0.112353	0.19546	0.225191	0.5944	0.809551	primiparity;code_bep_n;m_bmiincl;m_hbincl;ga_days_incl;GWG;w_age;m_heightincl	FALSE
SDMA	14–21d	Postnatal	-0.0108906	-0.0265334	0.00475218	0.100203	0.170925	0.426353	primiparity;code_bep_n;m_bmiincl;ga_days_incl;GWG;w_age;m_heightincl;m_muacincl	FALSE
t4.OH.Pro	14–21d	Postnatal	-2.65124	-5.30107	-0.00142008	-4	0.0498789	0.198612	w_age;m_muacincl	TRUE
Taurine	14–21d	Postnatal	21.1995	-25.7556	68.1546	4	0.373723	0.661087	m_bmiincl;m_hbincl;m_heightincl;m_muacincl	FALSE
TrpBetaine	14–21d	Postnatal	-0.0813761	-0.525707	0.362955	-0.0677814	0.71791	0.875693	m_bmiincl;m_hbincl;ga_days_incl;w_age;m_muacincl	FALSE
Ala	14–21d	Postnatal	-21.4504	-70.7372	27.8365	-4	0.391108	0.66933	m_bmiincl;m_hbincl;ga_days_incl;w_age;m_heightincl;m_muacincl	FALSE
Arg	14–21d	Postnatal	-2.06092	-5.48089	1.35906	-4	0.235598	0.505341	primiparity;m_bmiincl;m_hbincl;w_age;m_muacincl	FALSE
Asn	14–21d	Postnatal	-2.99791	-7.62107	1.62524	-4	0.202048	0.467019	m_bmiincl;ga_days_incl;m_muacincl	FALSE	TRUE	FALSE	0.677686
Asp	14–21d	Postnatal	6.03746	-7.48772	19.5627	4	0.379145	0.667192	primiparity;m_hbincl;w_age	FALSE
Cys	14–21d	Postnatal	-2.88865	-4.99736	-0.779937	-4	0.00758109	0.0716171		TRUE	TRUE	FALSE	0.762238
Cys	14–21d	Postnatal	-2.88865	-4.99736	-0.779937	-4	0.00758109	0.0716171		TRUE	TRUE	FALSE	0.677686
Gln	14–21d	Postnatal	0.528402	-68.6099	69.6667	1.38547	0.987968	0.990956	primiparity;code_bep_n;m_bmiincl;m_hbincl;ga_days_incl;GWG;w_age;m_heightincl;m_muacincl	FALSE
Glu	14–21d	Postnatal	3.54933	-140.354	147.452	4	0.961183	0.990956	primiparity;code_bep_n;m_bmiincl;m_hbincl;ga_days_incl;GWG;w_age;m_heightincl;m_muacincl	FALSE
Gly	14–21d	Postnatal	-18.1172	-36.4679	0.233461	-4	0.052948	0.204425	m_bmiincl;w_age;m_muacincl	FALSE
His	14–21d	Postnatal	-0.109089	-4.11058	3.8924	-0.133829	0.957099	0.990956	primiparity;code_bep_n;m_bmiincl;m_hbincl;ga_days_incl;GWG;w_age;m_heightincl;m_muacincl	FALSE
Ile	14–21d	Postnatal	0.351668	-1.39783	2.10117	0.964273	0.691725	0.865114	primiparity;code_bep_n;m_hbincl;ga_days_incl;GWG;w_age;m_heightincl;m_muacincl	FALSE
Leu	14–21d	Postnatal	-2.32282	-5.59983	0.954181	-4	0.163398	0.423486	w_age;m_heightincl	FALSE
Lys	14–21d	Postnatal	-1.71286	-6.59352	3.1678	-3.95602	0.489021	0.738521	primiparity;code_bep_n;m_bmiincl;m_hbincl;GWG;w_age;m_muacincl	FALSE
Met	14–21d	Postnatal	-0.334552	-1.26439	0.595288	-0.671164	0.478134	0.734324	code_bep_n;m_bmiincl;m_hbincl;ga_days_incl;GWG;w_age;m_heightincl;m_muacincl	FALSE
Phe	14–21d	Postnatal	-0.486216	-2.14995	1.17752	-1.03262	0.564473	0.79312	m_hbincl;w_age;m_heightincl	FALSE
Pro	14–21d	Postnatal	-5.36864	-10.6585	-0.0787598	-4	0.0467268	0.19747		TRUE
Ser	14–21d	Postnatal	-5.8307	-19.7986	8.13717	-4	0.410718	0.688147	primiparity;m_bmiincl;m_hbincl;w_age;m_muacincl	FALSE
Thr	14–21d	Postnatal	-6.45964	-16.7117	3.79238	-4	0.215004	0.478736	primiparity;code_bep_n;m_hbincl;ga_days_incl;GWG;w_age;m_heightincl;m_muacincl	FALSE
Trp	14–21d	Postnatal	0.144343	-0.319609	0.608295	0.470166	0.539543	0.774803	primiparity;code_bep_n;m_bmiincl;m_hbincl;ga_days_incl;GWG;w_age;m_heightincl;m_muacincl	FALSE
Tyr	14–21d	Postnatal	-0.287567	-2.47857	1.90344	-0.559187	0.79567	0.937075	primiparity;code_bep_n;m_bmiincl;m_hbincl;ga_days_incl;GWG;w_age;m_heightincl;m_muacincl	FALSE
Val	14–21d	Postnatal	-0.252809	-5.31839	4.81277	-0.476351	0.921553	0.990956	primiparity;code_bep_n;m_bmiincl;m_hbincl;ga_days_incl;GWG;w_age;m_heightincl;m_muacincl	FALSE
beta.Ala	14–21d	Postnatal	-0.0061447	-0.227342	0.215052	0.111514	0.956286	0.990956	primiparity;code_bep_n;m_bmiincl;m_hbincl;ga_days_incl;GWG;w_age;m_heightincl;m_muacincl	FALSE
GABA	14–21d	Postnatal	-0.00571646	-0.033807	0.0223741	0.112535	0.688107	0.865114	primiparity;code_bep_n;m_bmiincl;m_hbincl;ga_days_incl;GWG;w_age;m_heightincl	FALSE
Putrescine	14–21d	Postnatal	-0.150728	-0.390178	0.0887223	-0.233064	0.215433	0.478736	primiparity;code_bep_n;m_bmiincl;m_hbincl;ga_days_incl;GWG;w_age;m_heightincl;m_muacincl	FALSE
Spermidine	14–21d	Postnatal	-0.401015	-1.67583	0.873801	-0.829563	0.535062	0.771323	primiparity;code_bep_n;m_bmiincl;m_hbincl;ga_days_incl;GWG;w_age;m_heightincl;m_muacincl	FALSE
Spermine	14–21d	Postnatal	-0.920766	-1.83567	-0.00586221	-2.06826	0.0485693	0.198141	primiparity;code_bep_n;m_bmiincl;m_hbincl;ga_days_incl;GWG;w_age;m_heightincl;m_muacincl	TRUE
H1	14–21d	Postnatal	106.391	6.71391	206.067	4	0.0366095	0.173377	primiparity;m_bmiincl;m_hbincl;w_age	TRUE
AconAcid	14–21d	Postnatal	1.46312	-0.0749306	3.00116	3.61314	0.062093	0.221402	m_bmiincl;m_hbincl;w_age;m_heightincl	FALSE
HipAcid	14–21d	Postnatal	-7.69579	-14.9031	-0.48845	-4	0.0365366	0.173377	code_bep_n;m_hbincl;ga_days_incl;GWG	TRUE
OH.GlutAcid	14–21d	Postnatal	-0.106926	-0.264835	0.0509819	-0.128674	0.182921	0.445078	m_bmiincl;m_muacincl	FALSE
Cer.d16.1.20.0.	14–21d	Postnatal	-0.0553025	-0.101931	-0.00867413	-0.00564134	0.0204218	0.123116	primiparity;m_hbincl;w_age	TRUE
Cer.d16.1.22.0.	14–21d	Postnatal	-0.134718	-0.241435	-0.0280008	-0.194909	0.0137079	0.0954598	m_hbincl;w_age;m_muacincl	TRUE
Cer.d16.1.24.0.	14–21d	Postnatal	-0.121782	-0.206732	-0.0368319	-0.164079	0.00525417	0.0628283	m_hbincl;w_age	TRUE
Cer.d18.1.14.0.	14–21d	Postnatal	-0.0820663	-0.143535	-0.0205974	-0.0694263	0.00922125	0.076973	w_age;m_muacincl	TRUE
Cer.d18.1.16.0.	14–21d	Postnatal	-0.0769001	-0.155859	0.00205928	-0.0571139	0.0561994	0.211462	primiparity;m_hbincl;w_age;m_muacincl	FALSE
Cer.d18.1.18.0.	14–21d	Postnatal	-0.0960111	-0.18091	-0.0111127	-0.10266	0.0269332	0.147634	primiparity;code_bep_n;m_hbincl;GWG;w_age;m_muacincl	TRUE
Cer.d18.1.20.0.OH..	14–21d	Postnatal	-0.26574	-0.527433	-0.00404798	-0.507168	0.0466043	0.19747	primiparity;m_hbincl;w_age;m_muacincl	TRUE
Cer.d18.1.20.0.	14–21d	Postnatal	-0.0836763	-0.161443	-0.0059098	-0.0732633	0.0351402	0.173377	primiparity;m_hbincl;w_age;m_heightincl;m_muacincl	TRUE
Cer.d18.1.22.0.	14–21d	Postnatal	-0.163944	-0.357301	0.0294132	-0.264561	0.0959402	0.28845	primiparity;m_hbincl;w_age;m_muacincl	FALSE
Cer.d18.1.23.0.	14–21d	Postnatal	-0.0344798	-0.0854835	0.0165239	0.0439844	0.18363	0.445078	m_bmiincl;m_hbincl;w_age	FALSE
Cer.d18.1.24.0.	14–21d	Postnatal	-0.600794	-1.10452	-0.0970699	-1.30569	0.0197431	0.123116	primiparity;m_bmiincl;m_hbincl;w_age;m_heightincl;m_muacincl	TRUE
Cer.d18.1.24.1.	14–21d	Postnatal	-0.216295	-0.609275	0.176685	-0.389328	0.278472	0.560816	primiparity;m_bmiincl;m_hbincl;w_age;m_heightincl;m_muacincl	FALSE
Cer.d18.2.20.0.	14–21d	Postnatal	-0.00944447	-0.0300797	0.0111908	0.10365	0.367161	0.655063	primiparity;code_bep_n;m_hbincl;ga_days_incl;GWG;w_age;m_heightincl;m_muacincl	FALSE
Cer.d18.2.22.0.	14–21d	Postnatal	-0.036577	-0.0749934	0.00183932	0.0389862	0.0618645	0.221402	primiparity;m_hbincl;GWG;w_age;m_muacincl	FALSE
Cer.d18.2.24.0.	14–21d	Postnatal	-0.0740315	-0.137262	-0.0108007	-0.0502773	0.0220646	0.12723	primiparity;m_hbincl;w_age;m_muacincl	TRUE
Cer.d18.2.24.1.	14–21d	Postnatal	-0.018448	-0.0532088	0.0163129	0.0821923	0.295988	0.583096	primiparity;code_bep_n;m_hbincl;w_age;m_muacincl	FALSE
CE.14.0.	14–21d	Postnatal	-0.752476	-1.57973	0.0747785	-1.66718	0.0743003	0.24804	m_bmiincl	FALSE
CE.16.0.	14–21d	Postnatal	-0.3942	-0.817381	0.0289801	-0.813321	0.0676542	0.231065	primiparity;m_bmiincl;w_age	FALSE
CE.18.0.	14–21d	Postnatal	-0.0708971	-0.202221	0.0604271	-0.0428072	0.287721	0.570305	primiparity;code_bep_n;m_bmiincl;m_hbincl;ga_days_incl;w_age;m_heightincl;m_muacincl	FALSE
CE.18.1.	14–21d	Postnatal	0.0350754	-0.406288	0.476438	0.209752	0.875396	0.990956	primiparity;code_bep_n;m_bmiincl;m_hbincl;ga_days_incl;GWG;w_age;m_heightincl;m_muacincl	FALSE
CE.18.2.	14–21d	Postnatal	-0.264764	-0.86525	0.335723	-0.50484	0.384931	0.66933	primiparity;m_bmiincl;m_hbincl;ga_days_incl;w_age;m_heightincl;m_muacincl	FALSE
CE.18.3.	14–21d	Postnatal	0.0382636	0.0103483	0.0661788	0.21735	0.00754503	0.0716171		TRUE
CE.20.4.	14–21d	Postnatal	-0.0382952	-0.130016	0.0534258	0.0348912	0.410627	0.688147	primiparity;code_bep_n;m_bmiincl;ga_days_incl;w_age;m_muacincl	FALSE
CE.22.6.	14–21d	Postnatal	0.00821307	-0.0364189	0.0528451	0.145732	0.716597	0.875693	code_bep_n;m_bmiincl;m_hbincl;ga_days_incl;GWG;w_age;m_heightincl;m_muacincl	FALSE
p.Cresol.SO4	14–21d	Postnatal	-0.031731	-0.475162	0.4117	0.0505354	0.887715	0.990956	primiparity;code_bep_n;m_bmiincl;m_hbincl;ga_days_incl;GWG;w_age;m_heightincl;m_muacincl	FALSE
DG.14.0_18.1.	14–21d	Postnatal	-5.53147	-12.0596	0.996644	-4	0.09615	0.28845	code_bep_n;m_bmiincl;GWG;w_age;m_heightincl;m_muacincl	FALSE
DG.14.0_18.2.	14–21d	Postnatal	-8.7487	-16.9495	-0.547876	-4	0.0367059	0.173377	m_bmiincl;m_hbincl;w_age;m_heightincl;m_muacincl	TRUE
DG.16.0_16.1.	14–21d	Postnatal	-0.883395	-1.70401	-0.0627768	-1.9792	0.0350532	0.173377	m_hbincl;w_age;m_heightincl	TRUE
DG.16.0_18.1.	14–21d	Postnatal	-2.95772	-8.64795	2.73251	-4	0.306017	0.593326	primiparity;code_bep_n;GWG;m_heightincl	FALSE
DG.16.0_18.2.	14–21d	Postnatal	-5.52477	-10.852	-0.197557	-4	0.0421889	0.187319	m_hbincl;w_age;m_heightincl;m_muacincl	TRUE
DG.16.0_20.3.	14–21d	Postnatal	-0.321638	-0.575146	-0.0681292	-0.640385	0.0132517	0.0954598	m_bmiincl;m_hbincl;w_age;m_heightincl	TRUE
DG.16.1_18.0.	14–21d	Postnatal	-0.0466052	-0.114319	0.021109	0.0150864	0.175879	0.433834	code_bep_n;GWG;m_heightincl	FALSE
DG.16.1_18.1.	14–21d	Postnatal	-0.254993	-0.904517	0.39453	-0.481555	0.439055	0.708874	code_bep_n;m_bmiincl;m_hbincl;ga_days_incl;GWG;m_heightincl;m_muacincl	FALSE
DG.16.1_18.2.	14–21d	Postnatal	-0.628422	-1.28873	0.0318836	-1.37153	0.0619737	0.221402	m_bmiincl;m_hbincl;ga_days_incl;w_age;m_heightincl;m_muacincl	FALSE
DG.17.0_18.1.	14–21d	Postnatal	-0.0397941	-0.233385	0.153796	0.031319	0.685138	0.865114	primiparity;code_bep_n;m_bmiincl;m_hbincl;GWG;w_age;m_heightincl	FALSE
DG.18.1_18.1.	14–21d	Postnatal	0.670073	-0.41916	1.75931	1.72311	0.226034	0.489556	primiparity;code_bep_n;GWG;w_age;m_heightincl	FALSE
DG.18.1_18.2.	14–21d	Postnatal	-1.23197	-5.14135	2.67741	-2.80995	0.534329	0.771323	primiparity;code_bep_n;m_bmiincl;m_hbincl;ga_days_incl;GWG;w_age;m_heightincl;m_muacincl	FALSE
DG.18.1_18.3.	14–21d	Postnatal	0.478265	0.143343	0.813187	1.26598	0.00542865	0.0628283	m_bmiincl;m_muacincl	TRUE	TRUE	TRUE	0.85
DG.18.1_20.1.	14–21d	Postnatal	0.00725107	-0.00787402	0.0223762	0.14344	0.34498	0.632938	primiparity;code_bep_n;GWG;w_age;m_heightincl	FALSE
DG.18.1_20.2.	14–21d	Postnatal	-0.0941777	-0.21465	0.0262945	-0.0982908	0.124508	0.35437	primiparity;code_bep_n;m_bmiincl;GWG;w_age;m_heightincl;m_muacincl	FALSE
DG.18.1_20.3.	14–21d	Postnatal	-0.0614055	-0.12232	-0.000490499	-0.0201864	0.0482071	0.198141	m_bmiincl;GWG;m_heightincl;m_muacincl	TRUE
DG.18.1_22.6.	14–21d	Postnatal	0.115379	-0.436474	0.667231	0.401136	0.680049	0.865114	primiparity;m_bmiincl;m_hbincl;w_age;m_heightincl;m_muacincl	FALSE
DG.18.2_18.2.	14–21d	Postnatal	-3.462	-7.55874	0.634742	-4	0.0970311	0.28914	m_bmiincl;m_hbincl;ga_days_incl;w_age;m_heightincl;m_muacincl	FALSE
DG.18.2_18.3.	14–21d	Postnatal	0.49205	0.0492063	0.934893	1.29884	0.0296723	0.156877	m_bmiincl;m_hbincl;m_heightincl;m_muacincl	TRUE
DG.18.3_20.2.	14–21d	Postnatal	0.000116373	-0.00950642	0.00973917	0.126436	0.980962	0.990956	primiparity;code_bep_n;m_bmiincl;m_hbincl;ga_days_incl;GWG;w_age;m_heightincl;m_muacincl	FALSE
Hex2Cer.d18.1.14.0.	14–21d	Postnatal	-0.0192123	-0.0352413	-0.00318322	0.0803707	0.0191467	0.123112	w_age;m_muacincl	TRUE
Hex2Cer.d18.1.16.0.	14–21d	Postnatal	0.0546285	-0.236895	0.346152	0.256352	0.711624	0.875238	primiparity;m_bmiincl;m_hbincl;ga_days_incl;GWG;w_age;m_heightincl;m_muacincl	FALSE
Hex2Cer.d18.1.18.0.	14–21d	Postnatal	-0.0205416	-0.0666625	0.0255794	0.0772028	0.380179	0.667192	primiparity;code_bep_n;m_hbincl;ga_days_incl;w_age;m_muacincl	FALSE
Hex2Cer.d18.1.20.0.	14–21d	Postnatal	-0.0363001	-0.10663	0.0340296	0.0396461	0.309331	0.597143	primiparity;code_bep_n;m_bmiincl;m_hbincl;ga_days_incl;GWG;w_age;m_heightincl;m_muacincl	FALSE
Hex2Cer.d18.1.22.0.	14–21d	Postnatal	-0.078208	-0.242832	0.0864161	-0.0602311	0.349297	0.635606	primiparity;code_bep_n;m_bmiincl;m_hbincl;ga_days_incl;GWG;w_age;m_muacincl	FALSE
Hex2Cer.d18.1.24.0.	14–21d	Postnatal	-0.229112	-0.512071	0.0538468	-0.419873	0.111694	0.319949	primiparity;code_bep_n;m_bmiincl;m_hbincl;ga_days_incl;GWG;w_age;m_muacincl	FALSE
Hex2Cer.d18.1.24.1.	14–21d	Postnatal	0.00696111	-0.178505	0.192427	0.142749	0.940967	0.990956	primiparity;code_bep_n;m_bmiincl;m_hbincl;ga_days_incl;w_age;m_muacincl	FALSE	TRUE	FALSE	0.677686
AA	14–21d	Postnatal	-4.72076	-9.64095	0.199431	-4	0.0599042	0.221402	m_bmiincl;m_hbincl;w_age;m_heightincl;m_muacincl	FALSE
DHA	14–21d	Postnatal	-0.234333	-2.95231	2.48365	-0.432316	0.864931	0.990956	primiparity;code_bep_n;m_bmiincl;m_hbincl;ga_days_incl;GWG;w_age	FALSE
EPA	14–21d	Postnatal	0.00788665	-1.3649	1.38067	0.144954	0.990956	0.990956	primiparity;m_bmiincl;m_hbincl;GWG;w_age;m_muacincl	FALSE
FA.12.0.	14–21d	Postnatal	-271.663	-500.892	-42.4336	-4	0.0205193	0.123116	m_bmiincl;w_age;m_heightincl;m_muacincl	TRUE	TRUE	FALSE	0.677686
FA.14.0.	14–21d	Postnatal	-164.733	-377.433	47.967	-4	0.12802	0.362043	m_bmiincl;m_hbincl;w_age;m_heightincl;m_muacincl	FALSE
FA.18.1.	14–21d	Postnatal	-49.99	-119.979	19.9988	-4	0.16019	0.423358	code_bep_n;m_bmiincl;GWG;w_age;m_heightincl;m_muacincl	FALSE
FA.18.2.	14–21d	Postnatal	-34.8985	-60.92	-8.87695	-4	0.00892014	0.076973	m_bmiincl;m_hbincl;m_heightincl;m_muacincl	TRUE
FA.20.2.	14–21d	Postnatal	-3.8424	-7.9479	0.263105	-4	0.0663785	0.228466	m_bmiincl;m_hbincl;ga_days_incl;w_age;m_heightincl;m_muacincl	FALSE
FA.20.3.	14–21d	Postnatal	-3.29071	-5.77935	-0.802059	-4	0.00990385	0.0789541	m_bmiincl;w_age;m_heightincl;m_muacincl	TRUE
HexCer.d16.1.22.0.	14–21d	Postnatal	-0.00886413	-0.0236734	0.0059451	0.105033	0.238724	0.508486	primiparity;code_bep_n;m_bmiincl;m_hbincl;ga_days_incl;GWG;w_age;m_muacincl	FALSE
HexCer.d16.1.24.0.	14–21d	Postnatal	-0.0156443	-0.0347698	0.00348121	0.0888742	0.108105	0.311678	primiparity;code_bep_n;m_bmiincl;m_hbincl;ga_days_incl;GWG;w_age;m_heightincl;m_muacincl	FALSE
HexCer.d18.1.14.0.	14–21d	Postnatal	-0.0271261	-0.0580448	0.00379252	0.06151	0.0850487	0.267813	m_bmiincl;m_hbincl;m_muacincl	FALSE
HexCer.d18.1.16.0.	14–21d	Postnatal	-0.0210379	-0.0773997	0.0353238	0.0760197	0.461843	0.727158	primiparity;code_bep_n;m_hbincl;ga_days_incl;GWG;w_age;m_heightincl;m_muacincl	FALSE
HexCer.d18.1.18.0.	14–21d	Postnatal	-0.0182979	-0.0605334	0.0239376	0.08255	0.393243	0.66933	primiparity;code_bep_n;m_hbincl;ga_days_incl;GWG;w_age;m_heightincl;m_muacincl	FALSE
HexCer.d18.1.20.0.	14–21d	Postnatal	-0.0375171	-0.126702	0.0516683	0.0367458	0.407064	0.687211	primiparity;code_bep_n;m_bmiincl;m_hbincl;ga_days_incl;GWG;w_age;m_heightincl;m_muacincl	FALSE
HexCer.d18.1.22.0.	14–21d	Postnatal	-0.200585	-0.697155	0.295986	-0.351885	0.425925	0.702079	primiparity;code_bep_n;m_bmiincl;m_hbincl;ga_days_incl;GWG;w_age;m_heightincl;m_muacincl	FALSE
HexCer.d18.1.23.0.	14–21d	Postnatal	-0.0225928	-0.130579	0.0853933	0.0723141	0.679814	0.865114	primiparity;code_bep_n;m_bmiincl;m_hbincl;ga_days_incl;GWG;w_age;m_heightincl;m_muacincl	FALSE
HexCer.d18.1.24.0.	14–21d	Postnatal	-0.411478	-1.02371	0.200756	-0.854497	0.186123	0.446694	primiparity;code_bep_n;m_bmiincl;m_hbincl;ga_days_incl;GWG;w_age;m_heightincl;m_muacincl	FALSE
HexCer.d18.1.24.1.	14–21d	Postnatal	0.0209293	-1.07491	1.11677	0.176038	0.969938	0.990956	primiparity;code_bep_n;m_bmiincl;m_hbincl;ga_days_incl;GWG;w_age;m_heightincl;m_muacincl	FALSE
HexCer.d18.1.26.0.	14–21d	Postnatal	-0.00813496	-0.0190348	0.00276492	0.106771	0.142361	0.385417	code_bep_n;m_bmiincl;ga_days_incl;GWG;w_age;m_muacincl	FALSE
HexCer.d18.1.26.1.	14–21d	Postnatal	-0.00768676	-0.0481667	0.0327932	0.107839	0.707952	0.873141	primiparity;code_bep_n;m_bmiincl;m_hbincl;ga_days_incl;GWG;w_age;m_heightincl;m_muacincl	FALSE
HexCer.d18.2.16.0.	14–21d	Postnatal	-0.000874791	-0.00305236	0.00130278	0.124074	0.428511	0.702079	primiparity;code_bep_n;m_bmiincl;m_hbincl;w_age;m_muacincl	FALSE
HexCer.d18.2.18.0.	14–21d	Postnatal	-0.00271868	-0.00948091	0.00404355	0.119679	0.428119	0.702079	primiparity;code_bep_n;m_bmiincl;m_hbincl;ga_days_incl;GWG;w_age;m_muacincl	FALSE
HexCer.d18.2.20.0.	14–21d	Postnatal	-0.00246793	-0.0148481	0.00991222	0.120277	0.694148	0.865114	primiparity;code_bep_n;m_bmiincl;m_hbincl;ga_days_incl;GWG;w_age;m_muacincl	FALSE
HexCer.d18.2.22.0.	14–21d	Postnatal	-0.0742026	-0.243425	0.0950202	-0.0506852	0.387543	0.66933	primiparity;code_bep_n;m_hbincl;ga_days_incl;GWG;w_age;m_heightincl;m_muacincl	FALSE
HexCer.d18.2.23.0.	14–21d	Postnatal	-0.00805371	-0.0293274	0.01322	0.106964	0.455491	0.724867	primiparity;code_bep_n;m_bmiincl;m_hbincl;ga_days_incl;GWG;w_age;m_heightincl;m_muacincl	FALSE
HexCer.d18.2.24.0.	14–21d	Postnatal	-0.264393	-0.617948	0.089161	-0.503958	0.141553	0.385417	primiparity;code_bep_n;m_bmiincl;m_hbincl;ga_days_incl;GWG;w_age;m_heightincl;m_muacincl	FALSE
Ind.SO4	14–21d	Postnatal	0.088082	0.0401141	0.13605	0.33608	0.000390052	0.00961696		TRUE
lysoPC.a.C14.0	14–21d	Postnatal	0.128681	-0.485511	0.742872	0.432837	0.679405	0.865114	primiparity;code_bep_n;m_bmiincl;m_hbincl;GWG;w_age;m_heightincl;m_muacincl	FALSE
lysoPC.a.C16.0	14–21d	Postnatal	-0.0198663	-0.706962	0.667229	0.078812	0.954505	0.990956	primiparity;code_bep_n;m_bmiincl;m_hbincl;ga_days_incl;GWG;w_age;m_heightincl	FALSE
lysoPC.a.C18.0	14–21d	Postnatal	0.0169878	-0.740678	0.774653	0.166645	0.964715	0.990956	primiparity;m_bmiincl;m_hbincl;ga_days_incl;w_age;m_muacincl	FALSE
lysoPC.a.C18.1	14–21d	Postnatal	0.103955	-0.257155	0.465065	0.37391	0.5703	0.795915	primiparity;m_hbincl;w_age	FALSE
lysoPC.a.C18.2	14–21d	Postnatal	-0.0203075	-0.841152	0.800537	0.0777605	0.961065	0.990956	primiparity;code_bep_n;m_bmiincl;m_hbincl;ga_days_incl;GWG;w_age;m_heightincl;m_muacincl	FALSE
lysoPC.a.C20.4	14–21d	Postnatal	-0.0109511	-0.0564964	0.0345941	0.100059	0.635338	0.842526	primiparity;code_bep_n;ga_days_incl;GWG;w_age;m_heightincl;m_muacincl	FALSE
lysoPC.a.C26.1	14–21d	Postnatal	0.0355529	-0.0820341	0.15314	0.21089	0.551062	0.784203	primiparity;m_bmiincl;m_hbincl;w_age;m_heightincl	FALSE
PC.aa.C28.1	14–21d	Postnatal	-0.147856	-0.26505	-0.0306626	-0.226221	0.01376	0.0954598	m_bmiincl;m_muacincl	TRUE
PC.aa.C30.0	14–21d	Postnatal	-1.16847	-2.18974	-0.147194	-2.65859	0.0252154	0.143534		TRUE
PC.aa.C32.0	14–21d	Postnatal	-1.30276	-2.74974	0.144222	-2.97864	0.0772635	0.248587	primiparity;m_bmiincl;w_age;m_muacincl	FALSE
PC.aa.C32.1	14–21d	Postnatal	-0.0453505	-0.3253	0.234599	0.0180767	0.749273	0.896704	primiparity;code_bep_n;m_bmiincl;m_hbincl;ga_days_incl;GWG;w_age;m_heightincl;m_muacincl	FALSE
PC.aa.C32.2	14–21d	Postnatal	-0.100289	-0.215427	0.0148478	-0.112857	0.087285	0.271011	primiparity;m_bmiincl;w_age;m_muacincl	FALSE
PC.aa.C32.3	14–21d	Postnatal	0.00249844	-0.00541883	0.0104157	0.132113	0.533816	0.771323	primiparity;m_bmiincl;m_hbincl;w_age;m_muacincl	FALSE
PC.aa.C34.1	14–21d	Postnatal	-0.0472405	-1.45518	1.3607	0.0135725	0.947213	0.990956	primiparity;code_bep_n;m_bmiincl;m_hbincl;ga_days_incl;GWG;w_age;m_heightincl;m_muacincl	FALSE
PC.aa.C34.2	14–21d	Postnatal	-1.22192	-2.43797	-0.00586183	-2.78598	0.04892	0.198141	primiparity;w_age;m_heightincl;m_muacincl	TRUE
PC.aa.C34.3	14–21d	Postnatal	0.0292593	-0.0220877	0.0806064	0.195891	0.261933	0.538417	primiparity;m_bmiincl;m_hbincl;w_age;m_muacincl	FALSE
PC.aa.C34.4	14–21d	Postnatal	-0.018732	-0.0361508	-0.00131318	0.0815154	0.0352379	0.173377	primiparity;w_age	TRUE
PC.aa.C36.1	14–21d	Postnatal	-0.363925	-1.63437	0.906524	-0.741168	0.572124	0.795915	primiparity;code_bep_n;m_bmiincl;m_hbincl;ga_days_incl;GWG;w_age;m_heightincl;m_muacincl	FALSE
PC.aa.C36.2	14–21d	Postnatal	-1.12761	-4.53504	2.27981	-2.56123	0.51407	0.753291	primiparity;code_bep_n;m_bmiincl;m_hbincl;ga_days_incl;GWG;w_age;m_heightincl;m_muacincl	FALSE
PC.aa.C36.3	14–21d	Postnatal	0.0537848	-0.667079	0.774648	0.254341	0.882958	0.990956	primiparity;code_bep_n;m_bmiincl;m_hbincl;ga_days_incl;GWG;w_age;m_heightincl;m_muacincl	FALSE
PC.aa.C36.4	14–21d	Postnatal	-0.24274	-0.606476	0.120997	-0.452352	0.189228	0.446901	primiparity;code_bep_n;m_bmiincl;m_hbincl;ga_days_incl;GWG;w_age;m_heightincl;m_muacincl	FALSE
PC.aa.C36.5	14–21d	Postnatal	0.0370664	0.000473675	0.0736591	0.214497	0.0471438	0.19747	m_muacincl	TRUE
PC.aa.C36.6	14–21d	Postnatal	-0.00305455	-0.0133591	0.00724997	0.118879	0.558852	0.789507	primiparity;m_bmiincl;m_hbincl;ga_days_incl;GWG;w_age;m_muacincl	FALSE
PC.aa.C38.0	14–21d	Postnatal	-0.0214695	-0.0982175	0.0552785	0.0749912	0.581154	0.798862	primiparity;code_bep_n;m_bmiincl;m_hbincl;ga_days_incl;GWG;w_age;m_heightincl;m_muacincl	FALSE
PC.aa.C38.3	14–21d	Postnatal	-0.281345	-0.534565	-0.0281239	-0.544357	0.0296795	0.156877	primiparity;m_bmiincl;w_age;m_muacincl	TRUE
PC.aa.C38.4	14–21d	Postnatal	-0.242976	-0.539039	0.0530874	-0.452914	0.106963	0.310403	primiparity;code_bep_n;m_bmiincl;m_hbincl;ga_days_incl;w_age;m_muacincl	FALSE
PC.aa.C38.5	14–21d	Postnatal	-0.00753273	-0.118971	0.103905	0.108206	0.893894	0.990956	primiparity;code_bep_n;m_bmiincl;m_hbincl;ga_days_incl;GWG;w_age;m_heightincl;m_muacincl	FALSE
PC.aa.C38.6	14–21d	Postnatal	-0.0356461	-0.11196	0.0406678	0.0412048	0.35747	0.645189	primiparity;m_hbincl;w_age;m_muacincl	FALSE
PC.aa.C40.3	14–21d	Postnatal	-0.0197241	-0.039457	8.74275e-06	0.0791509	0.0501003	0.198612	m_hbincl;ga_days_incl;w_age	FALSE
PC.aa.C40.4	14–21d	Postnatal	-0.0300982	-0.0631607	0.00296435	0.0544269	0.074065	0.24804	primiparity;m_hbincl;w_age	FALSE
PC.aa.C40.5	14–21d	Postnatal	-0.0159861	-0.0441654	0.0121931	0.0880595	0.26408	0.540329	primiparity;m_hbincl;w_age	FALSE
PC.aa.C40.6	14–21d	Postnatal	0.000582956	-0.0986317	0.0997976	0.127548	0.990749	0.990956	primiparity;code_bep_n;m_bmiincl;m_hbincl;ga_days_incl;GWG;w_age;m_heightincl;m_muacincl	FALSE
PC.aa.C42.4	14–21d	Postnatal	0.000771278	-0.00603264	0.0075752	0.127997	0.82302	0.961634	primiparity;code_bep_n;m_bmiincl;m_hbincl;ga_days_incl;GWG;w_age;m_heightincl;m_muacincl	FALSE
PC.ae.C30.1	14–21d	Postnatal	-0.0490998	-0.196404	0.0982043	0.00914109	0.511034	0.751322	primiparity;code_bep_n;m_bmiincl;m_hbincl;ga_days_incl;GWG;w_age;m_heightincl;m_muacincl	FALSE
PC.ae.C30.2	14–21d	Postnatal	-0.00658767	-0.0115322	-0.00164318	0.110458	0.00936158	0.076973	m_hbincl	TRUE
PC.ae.C32.1	14–21d	Postnatal	-0.0288104	-0.0745649	0.016944	0.0574959	0.215326	0.478736	primiparity;m_hbincl;ga_days_incl;w_age;m_muacincl	FALSE
PC.ae.C34.0	14–21d	Postnatal	-0.011431	-0.0609746	0.0381126	0.0989155	0.649057	0.855138	primiparity;code_bep_n;m_bmiincl;m_hbincl;ga_days_incl;w_age;m_muacincl	FALSE
PC.ae.C34.1	14–21d	Postnatal	0.00894481	-0.0978446	0.115734	0.147476	0.868735	0.990956	primiparity;code_bep_n;m_bmiincl;m_hbincl;ga_days_incl;w_age;m_heightincl;m_muacincl	FALSE
PC.ae.C34.2	14–21d	Postnatal	-0.0416788	-0.12332	0.0399628	0.0268274	0.314622	0.600159	primiparity;code_bep_n;m_bmiincl;m_hbincl;ga_days_incl;GWG;w_age;m_heightincl;m_muacincl	FALSE
PC.ae.C34.3	14–21d	Postnatal	-0.134755	-0.233972	-0.035538	-0.194997	0.00810521	0.0739467	m_bmiincl;w_age;m_muacincl	TRUE	TRUE	FALSE	0.762238
PC.ae.C34.3	14–21d	Postnatal	-0.134755	-0.233972	-0.035538	-0.194997	0.00810521	0.0739467	m_bmiincl;w_age;m_muacincl	TRUE	TRUE	FALSE	0.677686
PC.ae.C36.1	14–21d	Postnatal	0.00356405	-0.0548059	0.061934	0.134653	0.904101	0.990956	primiparity;code_bep_n;m_bmiincl;m_hbincl;ga_days_incl;GWG;w_age;m_heightincl;m_muacincl	FALSE
PC.ae.C36.2	14–21d	Postnatal	-0.0322942	-0.124825	0.0602361	0.0491931	0.491417	0.739497	primiparity;code_bep_n;m_bmiincl;m_hbincl;ga_days_incl;w_age;m_muacincl	FALSE
PC.ae.C36.3	14–21d	Postnatal	-0.0285345	-0.108732	0.051663	0.0581535	0.483004	0.734431	primiparity;code_bep_n;m_bmiincl;m_hbincl;ga_days_incl;GWG;w_age;m_heightincl;m_muacincl	FALSE
PC.ae.C36.4	14–21d	Postnatal	-0.100811	-0.208286	0.00666362	-0.1141	0.065783	0.228185	primiparity;code_bep_n;m_bmiincl;m_hbincl;w_age;m_heightincl;m_muacincl	FALSE	TRUE	FALSE	0.762238
PC.ae.C36.4	14–21d	Postnatal	-0.100811	-0.208286	0.00666362	-0.1141	0.065783	0.228185	primiparity;code_bep_n;m_bmiincl;m_hbincl;w_age;m_heightincl;m_muacincl	FALSE	TRUE	FALSE	0.677686
PC.ae.C36.5	14–21d	Postnatal	-0.127886	-0.218236	-0.0375355	-0.178626	0.00583808	0.0632222	m_muacincl	TRUE
PC.ae.C38.2	14–21d	Postnatal	-0.00717092	-0.026263	0.0119212	0.109068	0.459094	0.726891	primiparity;m_hbincl;ga_days_incl;w_age;m_muacincl	FALSE
PC.ae.C38.3	14–21d	Postnatal	-0.002437	-0.022738	0.017864	0.120351	0.812781	0.952176	primiparity;code_bep_n;m_bmiincl;m_hbincl;ga_days_incl;w_age;m_heightincl;m_muacincl	FALSE
PC.ae.C38.4	14–21d	Postnatal	-0.0536766	-0.151974	0.0446211	-0.00176637	0.282229	0.564457	primiparity;code_bep_n;m_bmiincl;m_hbincl;ga_days_incl;GWG;w_age;m_heightincl;m_muacincl	FALSE
PC.ae.C38.5	14–21d	Postnatal	-0.116967	-0.226896	-0.00703714	-0.152603	0.0371903	0.173816	w_age;m_muacincl	TRUE
PC.ae.C38.6	14–21d	Postnatal	-0.0107076	-0.0388436	0.0174285	0.10064	0.453204	0.723822	primiparity;ga_days_incl;w_age;m_muacincl	FALSE
PC.ae.C40.2	14–21d	Postnatal	0.00591355	-0.0139172	0.0257443	0.140252	0.556539	0.789468	primiparity;m_bmiincl;m_hbincl;w_age;m_muacincl	FALSE
PC.ae.C40.3	14–21d	Postnatal	0.000490315	-0.0120631	0.0130437	0.127327	0.938567	0.990956	primiparity;code_bep_n;m_bmiincl;m_hbincl;ga_days_incl;GWG;w_age;m_heightincl;m_muacincl	FALSE
PC.ae.C40.4	14–21d	Postnatal	0.00280265	-0.0353578	0.0409631	0.132838	0.884776	0.990956	primiparity;code_bep_n;m_bmiincl;m_hbincl;ga_days_incl;GWG;w_age;m_heightincl;m_muacincl	FALSE
PC.ae.C40.5	14–21d	Postnatal	0.040016	-0.0441682	0.1242	0.221527	0.34906	0.635606	primiparity;m_bmiincl;m_hbincl;w_age;m_muacincl	FALSE
PC.ae.C40.6	14–21d	Postnatal	-0.00370336	-0.0884569	0.0810502	0.117332	0.931294	0.990956	primiparity;code_bep_n;m_bmiincl;m_hbincl;GWG;w_age;m_heightincl;m_muacincl	FALSE
PC.ae.C42.3	14–21d	Postnatal	0.000326698	-0.00995642	0.0106098	0.126937	0.950013	0.990956	primiparity;code_bep_n;m_bmiincl;m_hbincl;ga_days_incl;GWG;w_age;m_heightincl;m_muacincl	FALSE
SM..OH..C14.1	14–21d	Postnatal	-0.00654782	-0.0225281	0.00943241	0.110553	0.419392	0.697415	primiparity;m_bmiincl;w_age;m_heightincl	FALSE
SM..OH..C16.1	14–21d	Postnatal	-0.00576136	-0.0259103	0.0143876	0.112428	0.572848	0.795915	primiparity;m_bmiincl;ga_days_incl;w_age;m_heightincl;m_muacincl	FALSE
SM..OH..C22.1	14–21d	Postnatal	-0.101749	-0.2644	0.0609016	-0.116335	0.218343	0.480952	primiparity;m_bmiincl;w_age	FALSE
SM..OH..C22.2	14–21d	Postnatal	0.00125225	-0.0302949	0.0327994	0.129143	0.937572	0.990956	primiparity;m_bmiincl;m_hbincl;ga_days_incl;w_age;m_heightincl;m_muacincl	FALSE
SM..OH..C24.1	14–21d	Postnatal	-0.0317011	-0.0642216	0.000819448	0.0506068	0.0559801	0.211462	primiparity;w_age;m_muacincl	FALSE
SM.C16.0	14–21d	Postnatal	-0.389804	-1.02116	0.241552	-0.802842	0.224365	0.488325	primiparity;m_bmiincl;m_hbincl;w_age	FALSE
SM.C16.1	14–21d	Postnatal	-0.0190319	-0.0496885	0.0116247	0.0808006	0.221835	0.485195	primiparity;m_bmiincl;w_age;m_muacincl	FALSE
SM.C18.0	14–21d	Postnatal	-0.221834	-0.731355	0.287687	-0.402528	0.390965	0.66933	primiparity;code_bep_n;m_bmiincl;m_hbincl;w_age	FALSE
SM.C18.1	14–21d	Postnatal	-0.0232796	-0.0599181	0.0133589	0.0706774	0.211215	0.478468	primiparity;m_bmiincl;m_hbincl;w_age;m_muacincl	FALSE
SM.C20.2	14–21d	Postnatal	-0.0050731	-0.00939617	-0.000750041	0.114068	0.0217648	0.127153	m_bmiincl;w_age;m_muacincl	TRUE
SM.C22.3	14–21d	Postnatal	-0.012173	-0.0217234	-0.00262265	0.0971471	0.0128362	0.0950828	w_age;m_muacincl	TRUE
SM.C24.0	14–21d	Postnatal	-1.72128	-3.16042	-0.282146	-3.9761	0.0194096	0.123112	primiparity;code_bep_n;m_bmiincl;m_hbincl;ga_days_incl;w_age;m_heightincl;m_muacincl	TRUE
SM.C24.1	14–21d	Postnatal	0.460063	-0.478393	1.39852	1.22261	0.334228	0.618322	primiparity;m_bmiincl;w_age;m_muacincl	FALSE
SM.C26.0	14–21d	Postnatal	-0.00995484	-0.0420646	0.0221549	0.102434	0.540966	0.774803	primiparity;code_bep_n;m_bmiincl;m_hbincl;ga_days_incl;GWG;w_age;m_heightincl;m_muacincl	FALSE
SM.C26.1	14–21d	Postnatal	0.0139557	-0.0245008	0.0524122	0.159418	0.474375	0.733876	code_bep_n;m_bmiincl;m_hbincl;ga_days_incl;GWG;w_age;m_heightincl	FALSE
TG.14.0_32.2.	14–21d	Postnatal	-101.596	-157.149	-46.043	-4	0.000411536	0.00961696	m_muacincl	TRUE
TG.14.0_34.0.	14–21d	Postnatal	-4.478	-11.475	2.51902	-4	0.207909	0.475832	primiparity;code_bep_n;m_bmiincl;m_hbincl;ga_days_incl;GWG;w_age;m_heightincl;m_muacincl	FALSE
TG.14.0_34.1.	14–21d	Postnatal	-58.3703	-111.238	-5.50273	-4	0.0307064	0.158531	primiparity;m_bmiincl;m_hbincl;w_age;m_heightincl;m_muacincl	TRUE
TG.14.0_34.2.	14–21d	Postnatal	-86.5001	-134.93	-38.0698	-4	0.000555136	0.012324	m_hbincl;w_age;m_muacincl	TRUE
TG.14.0_34.3.	14–21d	Postnatal	-7.98743	-15.6074	-0.367414	-4	0.0400587	0.181913	m_bmiincl;m_hbincl;w_age;m_heightincl;m_muacincl	TRUE
TG.14.0_35.1.	14–21d	Postnatal	-1.19607	-2.3873	-0.00483637	-2.72438	0.0490891	0.198141	m_bmiincl;w_age;m_heightincl;m_muacincl	TRUE
TG.14.0_35.2.	14–21d	Postnatal	-1.12983	-2.32092	0.0612526	-2.56652	0.0628302	0.221402	m_bmiincl;m_hbincl;ga_days_incl;w_age;m_muacincl	FALSE
TG.14.0_36.1.	14–21d	Postnatal	-0.350472	-23.9298	23.2289	-0.709105	0.976602	0.990956	primiparity;code_bep_n;m_bmiincl;m_hbincl;ga_days_incl;GWG;w_age;m_heightincl;m_muacincl	FALSE
TG.14.0_36.2.	14–21d	Postnatal	3.95511	-44.8371	52.7474	4	0.872925	0.990956	primiparity;code_bep_n;m_bmiincl;m_hbincl;ga_days_incl;GWG;w_age;m_heightincl;m_muacincl	FALSE
TG.14.0_36.3.	14–21d	Postnatal	-28.529	-71.2591	14.201	-4	0.189049	0.446901	primiparity;m_bmiincl;GWG;w_age;m_heightincl;m_muacincl	FALSE	TRUE	FALSE	0.677686
TG.14.0_36.4.	14–21d	Postnatal	-15.3949	-38.2121	7.42218	-4	0.184447	0.445078	m_bmiincl;m_hbincl;ga_days_incl;w_age;m_heightincl;m_muacincl	FALSE
TG.14.0_38.4.	14–21d	Postnatal	-5.6346	-9.73482	-1.53438	-4	0.00740715	0.0716171	primiparity;m_bmiincl;w_age;m_heightincl;m_muacincl	TRUE
TG.14.0_38.5.	14–21d	Postnatal	-2.10758	-5.13084	0.915685	-4	0.170378	0.426353	code_bep_n;m_bmiincl;m_hbincl;ga_days_incl;GWG;w_age;m_muacincl	FALSE
TG.16.0_28.1.	14–21d	Postnatal	-9.64555	-42.2919	23.0008	-4	0.560123	0.789507	primiparity;code_bep_n;m_bmiincl;m_hbincl;ga_days_incl;GWG;w_age;m_heightincl;m_muacincl	FALSE
TG.16.0_28.2.	14–21d	Postnatal	-16.1483	-37.0508	4.75412	-4	0.128971	0.362426	code_bep_n;m_hbincl;ga_days_incl;w_age;m_muacincl	FALSE
TG.16.0_30.2.	14–21d	Postnatal	-70.1139	-123.18	-17.0477	-4	0.00995818	0.0789541	m_hbincl;w_age;m_muacincl	TRUE
TG.16.0_32.0.	14–21d	Postnatal	0.557363	-13.8108	14.9255	1.4545	0.938989	0.990956	code_bep_n;m_bmiincl;m_hbincl;ga_days_incl;GWG;w_age;m_heightincl;m_muacincl	FALSE
TG.16.0_32.1.	14–21d	Postnatal	-50.7426	-98.5838	-2.90137	-4	0.0377904	0.174781	primiparity;m_bmiincl;m_hbincl;w_age;m_heightincl;m_muacincl	TRUE
TG.16.0_32.2.	14–21d	Postnatal	-73.368	-115.281	-31.4551	-4	0.000707222	0.0145873	m_hbincl;m_muacincl	TRUE	TRUE	FALSE	0.85
TG.16.0_32.3.	14–21d	Postnatal	-0.86877	-5.20056	3.46302	-1.94434	0.692372	0.865114	primiparity;code_bep_n;m_bmiincl;m_hbincl;ga_days_incl;GWG;w_age;m_heightincl;m_muacincl	FALSE
TG.16.0_33.1.	14–21d	Postnatal	-0.963717	-2.80029	0.872853	-2.17062	0.301437	0.587009	m_bmiincl;m_hbincl;w_age;m_muacincl	FALSE
TG.16.0_33.2.	14–21d	Postnatal	-0.646025	-1.73994	0.447886	-1.41348	0.245035	0.514642	primiparity;code_bep_n;m_bmiincl;m_hbincl;ga_days_incl;GWG;w_age	FALSE
TG.16.0_34.0.	14–21d	Postnatal	17.63	2.88907	32.3709	4	0.0194066	0.123112	m_bmiincl;w_age;m_muacincl	TRUE
TG.16.0_34.1.	14–21d	Postnatal	-0.598166	-86.3726	85.1763	-1.29942	0.989021	0.990956	primiparity;code_bep_n;m_bmiincl;m_hbincl;ga_days_incl;GWG;w_age;m_heightincl	FALSE
TG.16.0_34.2.	14–21d	Postnatal	-45.4407	-107.987	17.1055	-4	0.153195	0.40975	m_bmiincl;m_hbincl;ga_days_incl;w_age	FALSE
TG.16.0_34.3.	14–21d	Postnatal	-4.22242	-15.2277	6.78291	-4	0.449479	0.720464	primiparity;code_bep_n;m_hbincl;ga_days_incl;GWG;w_age;m_heightincl;m_muacincl	FALSE
TG.16.0_34.4.	14–21d	Postnatal	-0.627739	-2.26152	1.00604	-1.3699	0.448862	0.720464	code_bep_n;m_bmiincl;m_hbincl;ga_days_incl;GWG;w_age	FALSE
TG.16.0_35.1.	14–21d	Postnatal	0.377605	-1.87686	2.63207	1.02609	0.741091	0.894142	code_bep_n;m_bmiincl;m_hbincl;ga_days_incl;GWG;w_age;m_muacincl	FALSE
TG.16.0_35.2.	14–21d	Postnatal	-0.0520324	-2.2902	2.18614	0.00215199	0.963411	0.990956	primiparity;code_bep_n;m_bmiincl;m_hbincl;ga_days_incl;GWG;w_age;m_heightincl;m_muacincl	FALSE
TG.16.0_35.3.	14–21d	Postnatal	-0.203666	-1.2385	0.831164	-0.359229	0.697829	0.865114	primiparity;code_bep_n;m_bmiincl;m_hbincl;ga_days_incl;GWG;w_age;m_heightincl;m_muacincl	FALSE
TG.16.0_36.2.	14–21d	Postnatal	107.756	-18.2361	233.748	4	0.0931144	0.285036	primiparity;m_hbincl;w_age	FALSE
TG.16.0_36.3.	14–21d	Postnatal	16.3275	-83.4857	116.141	4	0.746915	0.896297	primiparity;m_bmiincl;m_hbincl;ga_days_incl;w_age;m_heightincl;m_muacincl	FALSE
TG.16.0_36.4.	14–21d	Postnatal	-3.58981	-55.5354	48.3557	-4	0.891541	0.990956	primiparity;code_bep_n;m_hbincl;ga_days_incl;GWG;w_age;m_heightincl;m_muacincl	FALSE
TG.16.0_36.5.	14–21d	Postnatal	7.67814	2.8264	12.5299	4	0.00212174	0.0315637	w_age	TRUE
TG.16.0_36.6.	14–21d	Postnatal	0.563124	-0.735796	1.86204	1.46823	0.392901	0.66933	primiparity;code_bep_n;m_bmiincl;m_hbincl;ga_days_incl;GWG;w_age;m_heightincl;m_muacincl	FALSE
TG.16.0_37.3.	14–21d	Postnatal	-0.24285	-1.27407	0.788366	-0.452616	0.64229	0.84874	primiparity;code_bep_n;m_bmiincl;m_hbincl;ga_days_incl;GWG;w_age;m_muacincl	FALSE	TRUE	FALSE	0.762238
TG.16.0_38.1.	14–21d	Postnatal	2.12689	-0.221124	4.4749	4	0.075495	0.248587	primiparity;m_hbincl;w_age	FALSE
TG.16.0_38.2.	14–21d	Postnatal	2.82199	-1.16546	6.80945	4	0.164053	0.423486	primiparity;w_age	FALSE
TG.16.0_38.3.	14–21d	Postnatal	-0.209175	-5.66065	5.2423	-0.372358	0.939653	0.990956	primiparity;ga_days_incl;GWG;w_age;m_heightincl;m_muacincl	FALSE
TG.16.0_38.4.	14–21d	Postnatal	-1.85364	-7.69665	3.98936	-4	0.531601	0.771323	primiparity;code_bep_n;m_bmiincl;m_hbincl;ga_days_incl;GWG;w_age;m_heightincl;m_muacincl	FALSE
TG.16.0_38.5.	14–21d	Postnatal	-0.0578619	-3.83332	3.7176	-0.0117411	0.975875	0.990956	primiparity;code_bep_n;m_bmiincl;m_hbincl;ga_days_incl;GWG;w_age;m_heightincl;m_muacincl	FALSE	TRUE	FALSE	0.85
TG.16.0_38.6.	14–21d	Postnatal	0.584193	-1.98765	3.15604	1.51844	0.654108	0.859243	primiparity;code_bep_n;m_bmiincl;m_hbincl;ga_days_incl;GWG;w_age;m_heightincl;m_muacincl	FALSE
TG.16.0_38.7.	14–21d	Postnatal	0.627444	-0.218672	1.47356	1.62152	0.14489	0.389885	primiparity;code_bep_n;m_bmiincl;m_hbincl;ga_days_incl;GWG;w_age;m_heightincl;m_muacincl	FALSE
TG.16.0_40.6.	14–21d	Postnatal	0.417486	-1.69191	2.52689	1.12113	0.696217	0.865114	primiparity;code_bep_n;m_bmiincl;m_hbincl;ga_days_incl;GWG;w_age;m_heightincl;m_muacincl	FALSE
TG.16.0_40.7.	14–21d	Postnatal	1.40365	-1.77218	4.57948	3.47142	0.38377	0.66933	primiparity;code_bep_n;m_bmiincl;m_hbincl;ga_days_incl;GWG;w_age;m_heightincl;m_muacincl	FALSE
TG.16.0_40.8.	14–21d	Postnatal	0.791163	-1.40308	2.98541	2.0117	0.477179	0.734324	primiparity;code_bep_n;m_bmiincl;m_hbincl;ga_days_incl;GWG;w_age;m_heightincl;m_muacincl	FALSE
TG.16.1_28.0.	14–21d	Postnatal	-20.5397	-31.6225	-9.45691	-4	0.000345892	0.00952439		TRUE
TG.16.1_30.1.	14–21d	Postnatal	-4.90091	-14.5449	4.74305	-4	0.31684	0.600617	primiparity;code_bep_n;m_bmiincl;m_hbincl;GWG;w_age;m_heightincl;m_muacincl	FALSE
TG.16.1_32.0.	14–21d	Postnatal	-7.24368	-12.9277	-1.55966	-4	0.012849	0.0950828	w_age	TRUE	FALSE	TRUE	0.762238
TG.16.1_32.1.	14–21d	Postnatal	-10.1022	-20.0721	-0.132224	-4	0.0470765	0.19747	primiparity;m_bmiincl;w_age;m_heightincl;m_muacincl	TRUE
TG.16.1_32.2.	14–21d	Postnatal	-7.74923	-12.6478	-2.85067	-4	0.00213269	0.0315637	m_hbincl;w_age;m_muacincl	TRUE	TRUE	FALSE	0.762238
TG.16.1_33.1.	14–21d	Postnatal	-0.221535	-0.610006	0.166935	-0.401816	0.261566	0.538417	m_bmiincl;m_hbincl;ga_days_incl;w_age;m_heightincl	FALSE
TG.16.1_34.0.	14–21d	Postnatal	-0.781841	-4.7588	3.19512	-1.73717	0.698173	0.865114	primiparity;m_bmiincl;m_hbincl;w_age;m_heightincl;m_muacincl	FALSE
TG.16.1_34.1.	14–21d	Postnatal	-4.45186	-26.2166	17.3128	-4	0.686606	0.865114	primiparity;code_bep_n;m_bmiincl;GWG;w_age;m_heightincl;m_muacincl	FALSE
TG.16.1_34.2.	14–21d	Postnatal	-10.2404	-23.9128	3.43202	-4	0.140962	0.385417	m_hbincl;ga_days_incl;w_age;m_heightincl;m_muacincl	FALSE	TRUE	FALSE	0.762238
TG.16.1_34.3.	14–21d	Postnatal	-0.466125	-2.34825	1.416	-0.984735	0.625206	0.841186	primiparity;code_bep_n;m_bmiincl;m_hbincl;ga_days_incl;GWG;w_age;m_heightincl;m_muacincl	FALSE
TG.16.1_36.1.	14–21d	Postnatal	2.66141	-2.40334	7.72616	4	0.300727	0.587009	primiparity;m_bmiincl;m_hbincl;w_age;m_heightincl;m_muacincl	FALSE
TG.16.1_36.2.	14–21d	Postnatal	8.61259	-3.36221	20.5874	4	0.157348	0.418338	primiparity;w_age	FALSE
TG.16.1_36.3.	14–21d	Postnatal	2.94306	-7.4196	13.3057	4	0.575425	0.795915	primiparity;m_bmiincl;m_hbincl;ga_days_incl;w_age;m_heightincl;m_muacincl	FALSE	TRUE	FALSE	0.677686
TG.16.1_36.4.	14–21d	Postnatal	-0.250178	-4.3782	3.87784	-0.47008	0.904816	0.990956	code_bep_n;m_bmiincl;m_hbincl;ga_days_incl;GWG;w_age;m_heightincl;m_muacincl	FALSE	TRUE	FALSE	0.677686
TG.16.1_36.5.	14–21d	Postnatal	0.582016	0.133776	1.03026	1.51325	0.0112847	0.0879021	m_hbincl;ga_days_incl;w_age	TRUE
TG.16.1_38.3.	14–21d	Postnatal	0.143379	-0.506004	0.792762	0.467867	0.663232	0.863754	primiparity;w_age;m_heightincl;m_muacincl	FALSE
TG.16.1_38.4.	14–21d	Postnatal	-0.108983	-0.770277	0.55231	-0.133576	0.745079	0.896297	primiparity;code_bep_n;m_bmiincl;m_hbincl;ga_days_incl;GWG;w_age;m_heightincl;m_muacincl	FALSE	TRUE	FALSE	0.762238
TG.16.1_38.5.	14–21d	Postnatal	0.0159275	-0.421055	0.45291	0.164118	0.942664	0.990956	primiparity;code_bep_n;m_bmiincl;m_hbincl;ga_days_incl;GWG;w_age;m_heightincl;m_muacincl	FALSE	TRUE	FALSE	0.677686
TG.17.0_32.1.	14–21d	Postnatal	-0.588574	-1.75248	0.575333	-1.27656	0.319247	0.600617	primiparity;m_bmiincl;w_age;m_heightincl;m_muacincl	FALSE
TG.17.0_34.1.	14–21d	Postnatal	1.09054	-1.0612	3.24229	2.7252	0.318202	0.600617	m_bmiincl;w_age;m_muacincl	FALSE	TRUE	FALSE	0.677686
TG.17.0_34.2.	14–21d	Postnatal	-0.39815	-2.22164	1.42534	-0.822733	0.666682	0.863754	primiparity;code_bep_n;m_bmiincl;m_hbincl;ga_days_incl;GWG;w_age;m_heightincl;m_muacincl	FALSE	TRUE	FALSE	0.762238
TG.17.0_34.3.	14–21d	Postnatal	0.0749871	-0.196644	0.346618	0.304872	0.586129	0.800743	primiparity;code_bep_n;m_bmiincl;m_hbincl;ga_days_incl;GWG;w_age;m_heightincl;m_muacincl	FALSE	FALSE	TRUE	0.762238
TG.17.0_36.3.	14–21d	Postnatal	1.00418	-0.813824	2.82219	2.51938	0.276848	0.560816	w_age	FALSE
TG.17.0_36.4.	14–21d	Postnatal	0.149359	-0.613929	0.912647	0.482118	0.699495	0.865114	primiparity;code_bep_n;m_bmiincl;m_hbincl;ga_days_incl;GWG;w_age;m_heightincl	FALSE
TG.17.1_32.1.	14–21d	Postnatal	-0.474585	-1.3067	0.357535	-1.0049	0.261518	0.538417	m_bmiincl;ga_days_incl;w_age;m_heightincl;m_muacincl	FALSE	TRUE	FALSE	0.677686
TG.17.1_34.1.	14–21d	Postnatal	0.241859	-1.55632	2.04003	0.70257	0.790741	0.933747	code_bep_n;m_bmiincl;m_hbincl;ga_days_incl;GWG;w_age;m_muacincl	FALSE
TG.17.1_34.2.	14–21d	Postnatal	-0.585288	-1.93687	0.766297	-1.26873	0.393457	0.66933	primiparity;code_bep_n;m_bmiincl;m_hbincl;ga_days_incl;GWG;w_age;m_heightincl	FALSE
TG.17.1_34.3.	14–21d	Postnatal	0.0300712	-0.161892	0.222035	0.197826	0.757289	0.903861	primiparity;code_bep_n;m_hbincl;ga_days_incl;GWG;w_age;m_heightincl;m_muacincl	FALSE
TG.17.1_36.3.	14–21d	Postnatal	0.623802	-0.598821	1.84643	1.61284	0.314948	0.600159	code_bep_n;m_hbincl;ga_days_incl;GWG;w_age;m_heightincl	FALSE	TRUE	FALSE	0.677686
TG.17.1_36.4.	14–21d	Postnatal	0.204318	-0.350568	0.759203	0.613099	0.467932	0.731776	primiparity;code_bep_n;m_hbincl;ga_days_incl;GWG;w_age;m_heightincl	FALSE	TRUE	FALSE	0.677686
TG.17.1_36.5.	14–21d	Postnatal	0.109656	0.0457778	0.173533	0.387495	0.000890082	0.0159713	code_bep_n;m_hbincl;ga_days_incl;GWG;m_heightincl	TRUE
TG.17.1_38.5.	14–21d	Postnatal	0.00469774	-0.00194018	0.0113357	0.137354	0.164009	0.423486	primiparity;code_bep_n;m_bmiincl;m_hbincl;ga_days_incl;GWG;m_heightincl;m_muacincl	FALSE
TG.17.2_34.2.	14–21d	Postnatal	0.0431297	-0.351095	0.437354	0.228948	0.829095	0.96366	primiparity;code_bep_n;m_bmiincl;m_hbincl;ga_days_incl;GWG;w_age;m_heightincl;m_muacincl	FALSE
TG.17.2_34.3.	14–21d	Postnatal	0.0350322	-0.0477396	0.117804	0.209649	0.404242	0.685051	primiparity;code_bep_n;m_hbincl;ga_days_incl;GWG;m_heightincl;m_muacincl	FALSE
TG.17.2_36.2.	14–21d	Postnatal	0.26372	0.0547643	0.472676	0.754671	0.0137273	0.0954598	ga_days_incl;w_age	TRUE
TG.17.2_36.3.	14–21d	Postnatal	0.0757701	-0.0433475	0.194888	0.306738	0.210697	0.478468	primiparity;code_bep_n;m_hbincl;ga_days_incl;GWG;w_age;m_heightincl	FALSE
TG.17.2_36.4.	14–21d	Postnatal	0.127204	-0.0626786	0.317086	0.429317	0.187571	0.446901	primiparity;code_bep_n;m_bmiincl;m_hbincl;ga_days_incl;GWG;m_heightincl	FALSE
TG.17.2_38.5.	14–21d	Postnatal	0.022477	-0.0122603	0.0572142	0.179727	0.203006	0.467019	code_bep_n;ga_days_incl;GWG;w_age;m_muacincl	FALSE
TG.17.2_38.6.	14–21d	Postnatal	0.0295446	-0.00491584	0.0640051	0.196571	0.0923143	0.284636	primiparity;code_bep_n;m_bmiincl;ga_days_incl;GWG;m_heightincl;m_muacincl	FALSE
TG.18.0_30.0.	14–21d	Postnatal	2.96182	-8.95596	14.8796	4	0.624033	0.841186	primiparity;m_bmiincl;m_hbincl;ga_days_incl;w_age;m_muacincl	FALSE
TG.18.0_30.1.	14–21d	Postnatal	8.03989	-28.9528	45.0326	4	0.668127	0.863754	primiparity;code_bep_n;m_bmiincl;m_hbincl;ga_days_incl;GWG;w_age;m_heightincl;m_muacincl	FALSE	TRUE	FALSE	0.677686
TG.18.0_32.0.	14–21d	Postnatal	8.25921	1.42218	15.0962	4	0.0182365	0.122682	w_age	TRUE
TG.18.0_32.1.	14–21d	Postnatal	0.830261	-30.0389	31.6994	2.10488	0.957674	0.990956	primiparity;code_bep_n;m_bmiincl;m_hbincl;ga_days_incl;GWG;w_age;m_heightincl;m_muacincl	FALSE
TG.18.0_32.2.	14–21d	Postnatal	-23.1643	-41.1226	-5.20598	-4	0.0118268	0.090536	primiparity;m_bmiincl;m_hbincl;w_age;m_muacincl	TRUE	FALSE	TRUE	0.85
TG.18.0_34.2.	14–21d	Postnatal	1.31613	-34.6243	37.2566	3.26284	0.942399	0.990956	primiparity;code_bep_n;m_bmiincl;m_hbincl;ga_days_incl;w_age;m_heightincl;m_muacincl	FALSE
TG.18.0_34.3.	14–21d	Postnatal	3.16744	-1.29103	7.6259	4	0.162435	0.423486	primiparity;m_hbincl;w_age;m_muacincl	FALSE
TG.18.0_36.1.	14–21d	Postnatal	32.3009	-26.4626	91.0644	4	0.279145	0.560816	primiparity;m_hbincl;w_age	FALSE
TG.18.0_36.2.	14–21d	Postnatal	52.0172	-27.931	131.965	4	0.200543	0.466184	primiparity;m_hbincl;w_age	FALSE	TRUE	TRUE	0.677686
TG.18.0_36.3.	14–21d	Postnatal	21.3149	-20.2576	62.8875	4	0.312591	0.600159	primiparity;m_bmiincl;m_hbincl;w_age;m_muacincl	FALSE
TG.18.0_36.4.	14–21d	Postnatal	3.36658	-10.3875	17.1207	4	0.629275	0.841805	primiparity;code_bep_n;m_bmiincl;ga_days_incl;GWG;w_age;m_muacincl	FALSE
TG.18.0_36.5.	14–21d	Postnatal	3.24065	1.7033	4.778	4	5.23256e-05	0.0039434	w_age	TRUE	FALSE	TRUE	0.85
TG.18.0_38.6.	14–21d	Postnatal	0.379123	-0.650909	1.40916	1.0297	0.468073	0.731776	primiparity;code_bep_n;m_bmiincl;m_hbincl;ga_days_incl;GWG;w_age;m_heightincl;m_muacincl	FALSE
TG.18.0_38.7.	14–21d	Postnatal	0.142114	0.0152757	0.268952	0.464851	0.0283573	0.153544	primiparity;code_bep_n;m_bmiincl;ga_days_incl;GWG;w_age;m_heightincl;m_muacincl	TRUE
TG.18.1_26.0.	14–21d	Postnatal	-65.3189	-176.094	45.4558	-4	0.24573	0.514642	primiparity;code_bep_n;m_bmiincl;m_hbincl;ga_days_incl;GWG;w_age;m_heightincl;m_muacincl	FALSE
TG.18.1_28.1.	14–21d	Postnatal	38.5233	-4.20173	81.2484	4	0.0768327	0.248587	primiparity;m_bmiincl;m_hbincl;w_age	FALSE
TG.18.1_30.0.	14–21d	Postnatal	-51.3411	-128.799	26.117	-4	0.192229	0.451586	primiparity;code_bep_n;m_bmiincl;m_hbincl;ga_days_incl;GWG;w_age;m_heightincl;m_muacincl	FALSE
TG.18.1_30.1.	14–21d	Postnatal	106.1	-5.45505	217.654	4	0.0621413	0.221402	primiparity;m_bmiincl;m_hbincl;w_age;m_muacincl	FALSE
TG.18.1_30.2.	14–21d	Postnatal	0.82882	-69.0658	70.7235	2.10145	0.981333	0.990956	primiparity;code_bep_n;m_bmiincl;m_hbincl;GWG;w_age;m_heightincl;m_muacincl	FALSE
TG.18.1_31.0.	14–21d	Postnatal	0.0570852	-2.46506	2.57923	0.262207	0.964377	0.990956	primiparity;code_bep_n;m_bmiincl;m_hbincl;ga_days_incl;GWG;w_age;m_heightincl;m_muacincl	FALSE
TG.18.1_32.0.	14–21d	Postnatal	3.2186	-65.8061	72.2433	4	0.92669	0.990956	primiparity;code_bep_n;m_bmiincl;m_hbincl;ga_days_incl;GWG;w_age;m_heightincl;m_muacincl	FALSE
TG.18.1_32.1.	14–21d	Postnatal	66.9356	-59.419	193.29	4	0.296801	0.583096	primiparity;code_bep_n;m_bmiincl;m_hbincl;ga_days_incl;GWG;w_age;m_heightincl;m_muacincl	FALSE
TG.18.1_32.2.	14–21d	Postnatal	-40.587	-105.093	23.919	-4	0.215647	0.478736	primiparity;code_bep_n;m_bmiincl;m_hbincl;GWG;w_age;m_heightincl;m_muacincl	FALSE
TG.18.1_32.3.	14–21d	Postnatal	14.2541	5.02891	23.4792	4	0.00268384	0.0361099	m_bmiincl;w_age;m_muacincl	TRUE
TG.18.1_33.0.	14–21d	Postnatal	2.12162	-1.27336	5.5166	4	0.218811	0.480952	m_bmiincl;w_age;m_muacincl	FALSE
TG.18.1_33.1.	14–21d	Postnatal	3.81076	-1.60512	9.22664	4	0.166488	0.424831	primiparity;w_age	FALSE
TG.18.1_33.2.	14–21d	Postnatal	1.101	-1.10654	3.30853	2.75011	0.325916	0.608765	code_bep_n;m_hbincl;ga_days_incl;GWG;w_age;m_muacincl	FALSE
TG.18.1_33.3.	14–21d	Postnatal	0.479933	0.134876	0.82499	1.26996	0.00672698	0.06946	w_age	TRUE
TG.18.1_34.1.	14–21d	Postnatal	297.27	13.5384	581.002	4	0.0401519	0.181913	primiparity;m_bmiincl;m_hbincl;w_age	TRUE
TG.18.1_34.2.	14–21d	Postnatal	33.2761	-125.745	192.297	4	0.679802	0.865114	primiparity;m_bmiincl;w_age;m_heightincl;m_muacincl	FALSE
TG.18.1_34.3.	14–21d	Postnatal	37.6489	9.59041	65.7074	4	0.00888262	0.076973	w_age;m_muacincl	TRUE
TG.18.1_34.4.	14–21d	Postnatal	3.48653	0.414222	6.55883	4	0.0264082	0.14703	w_age	TRUE
TG.18.1_35.2.	14–21d	Postnatal	4.29956	-0.251668	8.85078	4	0.0639034	0.22341	w_age	FALSE
TG.18.1_35.3.	14–21d	Postnatal	1.17622	-0.170291	2.52274	2.9294	0.0864035	0.270163	w_age	FALSE
TG.18.1_36.0.	14–21d	Postnatal	17.058	-7.33943	41.4555	4	0.169161	0.426353	primiparity;m_hbincl;w_age	FALSE
TG.18.1_36.1.	14–21d	Postnatal	92.3216	-17.5693	202.213	4	0.0989953	0.293026	primiparity;m_hbincl;w_age	FALSE
TG.18.1_36.2.	14–21d	Postnatal	159.246	66.3816	252.111	4	0.000899283	0.0159713	primiparity;w_age	TRUE
TG.18.1_36.3.	14–21d	Postnatal	167.537	33.9845	301.09	4	0.0143007	0.097685	primiparity;m_bmiincl;w_age;m_muacincl	TRUE
TG.18.1_36.4.	14–21d	Postnatal	65.4665	-0.306607	131.24	4	0.0510636	0.200639	primiparity;m_bmiincl;w_age;m_muacincl	FALSE
TG.18.1_36.5.	14–21d	Postnatal	22.1818	11.7948	32.5688	4	4.23036e-05	0.0039434	m_bmiincl;w_age	TRUE	FALSE	TRUE	0.762238
TG.18.1_36.5.	14–21d	Postnatal	22.1818	11.7948	32.5688	4	4.23036e-05	0.0039434	m_bmiincl;w_age	TRUE	FALSE	TRUE	0.85
TG.18.1_36.6.	14–21d	Postnatal	3.21272	1.32043	5.10502	4	0.0010055	0.0166582		TRUE	TRUE	FALSE	0.677686
TG.18.1_36.6.	14–21d	Postnatal	3.21272	1.32043	5.10502	4	0.0010055	0.0166582		TRUE	TRUE	FALSE	0.85
TG.18.1_38.5.	14–21d	Postnatal	5.74105	0.20794	11.2742	4	0.0420898	0.187319	w_age	TRUE
TG.18.1_38.6.	14–21d	Postnatal	3.00526	-0.326568	6.33709	4	0.0767263	0.248587	code_bep_n;m_bmiincl;ga_days_incl;GWG;m_heightincl	FALSE
TG.18.1_38.7.	14–21d	Postnatal	0.960876	0.262825	1.65893	2.41617	0.00730896	0.0716171	code_bep_n;m_hbincl;ga_days_incl;GWG;m_heightincl	TRUE
TG.18.2_28.0.	14–21d	Postnatal	-150.765	-247.898	-53.6329	-4	0.00256932	0.0356494	m_hbincl;w_age;m_muacincl	TRUE
TG.18.2_30.0.	14–21d	Postnatal	-117.571	-184.859	-50.2829	-4	0.000722794	0.0145873	w_age;m_muacincl	TRUE	FALSE	TRUE	0.85
TG.18.2_30.1.	14–21d	Postnatal	-7.2848	-81.8629	67.2933	-4	0.847174	0.982103	primiparity;code_bep_n;m_bmiincl;m_hbincl;GWG;w_age;m_heightincl;m_muacincl	FALSE
TG.18.2_31.0.	14–21d	Postnatal	-1.18378	-2.48072	0.113149	-2.6951	0.0733052	0.24804	code_bep_n;m_hbincl;ga_days_incl;GWG;w_age;m_muacincl	FALSE
TG.18.2_32.0.	14–21d	Postnatal	-54.7045	-105.743	-3.66563	-4	0.035843	0.173377	m_hbincl;ga_days_incl;w_age;m_muacincl	TRUE	TRUE	TRUE	0.85
TG.18.2_32.1.	14–21d	Postnatal	-49.1605	-122.016	23.6955	-4	0.184413	0.445078	primiparity;m_bmiincl;ga_days_incl;w_age;m_heightincl;m_muacincl	FALSE
TG.18.2_32.2.	14–21d	Postnatal	-66.7541	-125.607	-7.90135	-4	0.0264919	0.14703	m_bmiincl;m_hbincl;ga_days_incl;w_age;m_heightincl;m_muacincl	TRUE	TRUE	FALSE	0.85
TG.18.2_33.0.	14–21d	Postnatal	-0.722439	-3.30291	1.85804	-1.5956	0.580852	0.798862	primiparity;code_bep_n;m_bmiincl;m_hbincl;ga_days_incl;GWG;w_age;m_heightincl;m_muacincl	FALSE
TG.18.2_33.1.	14–21d	Postnatal	-0.638175	-4.32786	3.05151	-1.39477	0.732934	0.888311	primiparity;code_bep_n;m_bmiincl;m_hbincl;ga_days_incl;GWG;w_age;m_heightincl;m_muacincl	FALSE
TG.18.2_33.2.	14–21d	Postnatal	-0.382476	-2.09708	1.33212	-0.78538	0.659935	0.863754	primiparity;code_bep_n;m_hbincl;ga_days_incl;GWG;w_age;m_heightincl;m_muacincl	FALSE	TRUE	FALSE	0.677686
TG.18.2_34.0.	14–21d	Postnatal	0.481968	-53.2316	54.1955	1.27481	0.985874	0.990956	primiparity;code_bep_n;m_bmiincl;m_hbincl;ga_days_incl;GWG;w_age;m_heightincl;m_muacincl	FALSE	TRUE	FALSE	0.677686
TG.18.2_34.0.	14–21d	Postnatal	0.481968	-53.2316	54.1955	1.27481	0.985874	0.990956	primiparity;code_bep_n;m_bmiincl;m_hbincl;ga_days_incl;GWG;w_age;m_heightincl;m_muacincl	FALSE	TRUE	FALSE	0.85
TG.18.2_34.1.	14–21d	Postnatal	22.3106	-128.196	172.817	4	0.769953	0.916513	primiparity;m_bmiincl;ga_days_incl;w_age;m_heightincl;m_muacincl	FALSE
TG.18.2_34.2.	14–21d	Postnatal	-74.9428	-201.701	51.8153	-4	0.244522	0.514642	code_bep_n;m_hbincl;ga_days_incl;GWG;w_age;m_muacincl	FALSE
TG.18.2_34.3.	14–21d	Postnatal	5.45224	-9.57156	20.476	4	0.474361	0.733876	code_bep_n;m_bmiincl;m_hbincl;ga_days_incl;GWG;w_age;m_muacincl	FALSE
TG.18.2_34.4.	14–21d	Postnatal	0.482053	-1.25418	2.21828	1.27501	0.583988	0.80028	primiparity;code_bep_n;m_bmiincl;m_hbincl;ga_days_incl;GWG;w_age;m_heightincl;m_muacincl	FALSE
TG.18.2_35.1.	14–21d	Postnatal	0.255272	-4.32479	4.83534	0.734537	0.912432	0.990956	primiparity;code_bep_n;m_bmiincl;m_hbincl;ga_days_incl;GWG;w_age;m_muacincl	FALSE
TG.18.2_35.2.	14–21d	Postnatal	0.143827	-2.51639	2.80404	0.468934	0.915041	0.990956	primiparity;code_bep_n;m_bmiincl;m_hbincl;ga_days_incl;GWG;w_age;m_heightincl;m_muacincl	FALSE
TG.18.2_35.3.	14–21d	Postnatal	0.0644305	-1.02402	1.15288	0.279713	0.907017	0.990956	primiparity;code_bep_n;m_bmiincl;m_hbincl;ga_days_incl;GWG;w_age;m_heightincl;m_muacincl	FALSE
TG.18.2_36.0.	14–21d	Postnatal	0.813847	-11.3238	12.9514	2.06576	0.894743	0.990956	primiparity;code_bep_n;m_bmiincl;m_hbincl;ga_days_incl;GWG;w_age;m_heightincl;m_muacincl	FALSE
TG.18.2_36.1.	14–21d	Postnatal	28.2511	-20.3491	76.8513	4	0.2525	0.526338	primiparity;m_bmiincl;m_hbincl;w_age;m_muacincl	FALSE
TG.18.2_36.2.	14–21d	Postnatal	77.6771	-9.28244	164.637	4	0.0795928	0.252423	primiparity;m_bmiincl;w_age;m_muacincl	FALSE
TG.18.2_36.3.	14–21d	Postnatal	24.2935	-69.5405	118.128	4	0.609653	0.827785	primiparity;m_bmiincl;w_age;m_heightincl;m_muacincl	FALSE
TG.18.2_36.4.	14–21d	Postnatal	3.5444	-52.2949	59.3837	4	0.900327	0.990956	primiparity;code_bep_n;m_bmiincl;m_hbincl;ga_days_incl;GWG;w_age;m_heightincl;m_muacincl	FALSE
TG.18.2_36.5.	14–21d	Postnatal	8.23494	2.75138	13.7185	4	0.00350088	0.0457174	m_bmiincl;w_age;m_muacincl	TRUE
TG.18.2_38.4.	14–21d	Postnatal	-1.14208	-6.33016	4.046	-2.59571	0.664131	0.863754	primiparity;code_bep_n;m_bmiincl;m_hbincl;ga_days_incl;GWG;w_age;m_muacincl	FALSE
TG.18.2_38.5.	14–21d	Postnatal	0.719198	-2.26555	3.70395	1.84019	0.634604	0.842526	primiparity;code_bep_n;m_hbincl;ga_days_incl;GWG;w_age;m_heightincl;m_muacincl	FALSE
TG.18.2_38.6.	14–21d	Postnatal	1.11299	-1.71125	3.93722	2.77869	0.437277	0.70858	primiparity;code_bep_n;m_bmiincl;m_hbincl;ga_days_incl;GWG;w_age;m_heightincl;m_muacincl	FALSE
TG.18.3_30.0.	14–21d	Postnatal	8.37362	3.83847	12.9088	4	0.000364673	0.00952439	m_bmiincl;w_age;m_muacincl	TRUE	TRUE	TRUE	0.762238
TG.18.3_30.0.	14–21d	Postnatal	8.37362	3.83847	12.9088	4	0.000364673	0.00952439	m_bmiincl;w_age;m_muacincl	TRUE	FALSE	TRUE	0.85
TG.18.3_32.0.	14–21d	Postnatal	6.05355	2.80793	9.29917	4	0.000318439	0.00952439	w_age	TRUE	TRUE	FALSE	0.762238
TG.18.3_32.1.	14–21d	Postnatal	15.7925	7.4866	24.0984	4	0.000246454	0.00883916	m_bmiincl;w_age;m_muacincl	TRUE	FALSE	TRUE	0.762238
TG.18.3_32.1.	14–21d	Postnatal	15.7925	7.4866	24.0984	4	0.000246454	0.00883916	m_bmiincl;w_age;m_muacincl	TRUE	FALSE	TRUE	0.85
TG.18.3_33.2.	14–21d	Postnatal	0.0801006	0.0328939	0.127307	0.317059	0.001013	0.0166582	w_age	TRUE
TG.18.3_34.0.	14–21d	Postnatal	6.7787	3.60123	9.95618	4	4.29248e-05	0.0039434	w_age	TRUE
TG.18.3_34.1.	14–21d	Postnatal	38.4372	19.5858	57.2887	4	8.88154e-05	0.0039434	w_age	TRUE	TRUE	TRUE	0.762238
TG.18.3_34.1.	14–21d	Postnatal	38.4372	19.5858	57.2887	4	8.88154e-05	0.0039434	w_age	TRUE	TRUE	TRUE	0.85
TG.18.3_34.2.	14–21d	Postnatal	12.4978	4.56588	20.4296	4	0.00221892	0.0317806	m_bmiincl;w_age;m_muacincl	TRUE
TG.18.3_34.3.	14–21d	Postnatal	2.52845	1.2914	3.76551	4	8.57039e-05	0.0039434	m_bmiincl;w_age	TRUE	TRUE	TRUE	0.762238
TG.18.3_34.3.	14–21d	Postnatal	2.52845	1.2914	3.76551	4	8.57039e-05	0.0039434	m_bmiincl;w_age	TRUE	TRUE	TRUE	0.85
TG.18.3_35.2.	14–21d	Postnatal	0.525141	0.260621	0.789661	1.3777	0.000132912	0.00536483	w_age	TRUE
TG.18.3_36.1.	14–21d	Postnatal	7.56113	3.85444	11.2678	4	8.82083e-05	0.0039434	w_age	TRUE	TRUE	FALSE	0.85
TG.18.3_36.2.	14–21d	Postnatal	28.7457	17.061	40.4304	4	2.91669e-06	0.00129501	w_age	TRUE	FALSE	TRUE	0.762238
TG.18.3_36.2.	14–21d	Postnatal	28.7457	17.061	40.4304	4	2.91669e-06	0.00129501	w_age	TRUE	TRUE	TRUE	0.85
TG.18.3_36.3.	14–21d	Postnatal	19.3501	10.1269	28.5734	4	5.66597e-05	0.0039434	m_bmiincl;w_age	TRUE	FALSE	TRUE	0.762238
TG.18.3_36.3.	14–21d	Postnatal	19.3501	10.1269	28.5734	4	5.66597e-05	0.0039434	m_bmiincl;w_age	TRUE	FALSE	TRUE	0.85
TG.18.3_36.4.	14–21d	Postnatal	7.37343	3.48154	11.2653	4	0.000258804	0.00883916	m_bmiincl;w_age;m_muacincl	TRUE	FALSE	TRUE	0.762238
TG.18.3_36.4.	14–21d	Postnatal	7.37343	3.48154	11.2653	4	0.000258804	0.00883916	m_bmiincl;w_age;m_muacincl	TRUE	TRUE	TRUE	0.85
TG.18.3_38.5.	14–21d	Postnatal	0.536762	0.298597	0.774928	1.4054	1.64319e-05	0.00364789	w_age	TRUE	FALSE	TRUE	0.762238
TG.18.3_38.5.	14–21d	Postnatal	0.536762	0.298597	0.774928	1.4054	1.64319e-05	0.00364789	w_age	TRUE	TRUE	TRUE	0.85
TG.18.3_38.6.	14–21d	Postnatal	0.30279	0.156565	0.449015	0.847783	7.01903e-05	0.0039434	code_bep_n;m_hbincl;ga_days_incl;GWG;m_heightincl	TRUE
TG.20.0_32.3.	14–21d	Postnatal	0.0495859	-0.479684	0.578856	0.244334	0.853348	0.986684	primiparity;m_bmiincl;m_hbincl;ga_days_incl;w_age;m_heightincl;m_muacincl	FALSE	TRUE	FALSE	0.85
TG.20.0_32.4.	14–21d	Postnatal	-0.107312	-0.730962	0.516338	-0.129593	0.734257	0.888311	primiparity;code_bep_n;m_bmiincl;m_hbincl;ga_days_incl;GWG;w_age;m_heightincl;m_muacincl	FALSE	TRUE	FALSE	0.762238
TG.20.0_34.1.	14–21d	Postnatal	1.15841	0.034301	2.28252	2.88694	0.043491	0.189314	primiparity;m_hbincl;w_age	TRUE
TG.20.1_26.1.	14–21d	Postnatal	0.0758468	-0.234163	0.385857	0.306921	0.629458	0.841805	primiparity;m_hbincl;w_age;m_heightincl	FALSE
TG.20.1_30.1.	14–21d	Postnatal	2.14326	-0.367517	4.65403	4	0.093728	0.285036	primiparity;m_bmiincl;m_hbincl;w_age;m_muacincl	FALSE	TRUE	FALSE	0.677686
TG.20.1_32.1.	14–21d	Postnatal	1.33095	-1.44001	4.10192	3.29816	0.344013	0.632938	primiparity;m_bmiincl;m_hbincl;ga_days_incl;w_age;m_heightincl;m_muacincl	FALSE
TG.20.1_32.2.	14–21d	Postnatal	-0.644928	-2.05464	0.764782	-1.41087	0.367367	0.655063	primiparity;m_bmiincl;m_hbincl;ga_days_incl;w_age;m_heightincl;m_muacincl	FALSE	TRUE	FALSE	0.677686
TG.20.1_32.3.	14–21d	Postnatal	0.147081	-0.031043	0.325204	0.476689	0.104858	0.308324	primiparity;m_bmiincl;w_age;m_muacincl	FALSE
TG.20.1_34.0.	14–21d	Postnatal	1.06381	0.0349276	2.0927	2.6615	0.0428055	0.188175	m_hbincl;w_age	TRUE
TG.20.1_34.1.	14–21d	Postnatal	5.15681	-0.149979	10.4636	4	0.0567472	0.211729	primiparity;w_age	FALSE
TG.20.1_34.2.	14–21d	Postnatal	1.25478	-1.88232	4.39188	3.11662	0.430519	0.702758	primiparity;m_bmiincl;ga_days_incl;w_age;m_heightincl	FALSE
TG.20.1_34.3.	14–21d	Postnatal	0.621503	0.0926044	1.1504	1.60736	0.0215858	0.127153	w_age	TRUE
TG.20.2_32.0.	14–21d	Postnatal	-2.09157	-3.83864	-0.344501	-4	0.0192898	0.123112	m_hbincl;w_age;m_heightincl;m_muacincl	TRUE
TG.20.2_32.1.	14–21d	Postnatal	-2.95342	-5.94335	0.0365028	-4	0.0528257	0.204425	primiparity;m_bmiincl;w_age;m_heightincl;m_muacincl	FALSE
TG.20.2_34.1.	14–21d	Postnatal	-1.2462	-7.95426	5.46186	-2.84386	0.714007	0.875693	primiparity;code_bep_n;m_bmiincl;m_hbincl;GWG;w_age;m_heightincl;m_muacincl	FALSE
TG.20.2_34.2.	14–21d	Postnatal	-3.64017	-7.70662	0.426278	-4	0.0789536	0.252197	code_bep_n;m_hbincl;ga_days_incl;w_age;m_heightincl;m_muacincl	FALSE
TG.20.2_34.3.	14–21d	Postnatal	-0.0655619	-0.878842	0.747718	-0.0300923	0.873618	0.990956	primiparity;code_bep_n;m_bmiincl;m_hbincl;ga_days_incl;GWG;w_age;m_heightincl;m_muacincl	FALSE
TG.20.2_34.4.	14–21d	Postnatal	0.00122126	-0.0309033	0.0333459	0.129069	0.940209	0.990956	code_bep_n;m_bmiincl;m_hbincl;ga_days_incl;GWG;w_age;m_muacincl	FALSE
TG.20.2_36.5.	14–21d	Postnatal	0.189649	0.0302619	0.349037	0.578141	0.0200299	0.123116	m_bmiincl;m_hbincl;ga_days_incl;w_age;m_muacincl	TRUE
TG.20.3_32.0.	14–21d	Postnatal	-3.56517	-6.06685	-1.06349	-4	0.0055187	0.0628283	w_age	TRUE
TG.20.3_32.1.	14–21d	Postnatal	-2.75704	-6.40438	0.890301	-4	0.137345	0.381132	primiparity;m_bmiincl;m_hbincl;w_age;m_heightincl;m_muacincl	FALSE	TRUE	FALSE	0.85
TG.20.3_32.2.	14–21d	Postnatal	-2.50352	-4.21435	-0.792684	-4	0.00441123	0.0559596	m_bmiincl;m_hbincl;w_age;m_muacincl	TRUE	FALSE	TRUE	0.85
TG.20.3_34.0.	14–21d	Postnatal	-0.496141	-1.96209	0.969809	-1.05627	0.50461	0.744342	primiparity;code_bep_n;m_hbincl;ga_days_incl;GWG;w_age;m_heightincl	FALSE	TRUE	FALSE	0.762238
TG.20.3_34.1.	14–21d	Postnatal	0.909603	-6.62316	8.44236	2.29397	0.811712	0.952176	primiparity;ga_days_incl;w_age;m_heightincl;m_muacincl	FALSE
TG.20.3_34.2.	14–21d	Postnatal	-2.71719	-6.60283	1.16845	-4	0.169061	0.426353	primiparity;code_bep_n;m_hbincl;ga_days_incl;GWG;w_age;m_muacincl	FALSE
TG.20.3_34.3.	14–21d	Postnatal	0.0149968	-0.742918	0.772912	0.1619	0.968857	0.990956	primiparity;code_bep_n;m_bmiincl;m_hbincl;ga_days_incl;GWG;w_age;m_muacincl	FALSE
TG.20.3_36.3.	14–21d	Postnatal	0.837321	-2.09743	3.77207	2.12171	0.573704	0.795915	primiparity;m_bmiincl;ga_days_incl;w_age;m_muacincl	FALSE
TG.20.3_36.4.	14–21d	Postnatal	0.0928453	-0.980945	1.16664	0.347432	0.864539	0.990956	code_bep_n;m_bmiincl;m_hbincl;ga_days_incl;GWG;w_age;m_heightincl;m_muacincl	FALSE
TG.20.3_36.5.	14–21d	Postnatal	0.0988148	0.0456587	0.151971	0.361659	0.000332743	0.00952439	m_hbincl	TRUE
TG.20.4_30.0.	14–21d	Postnatal	-6.945	-12.0632	-1.82679	-4	0.00816078	0.0739467	w_age;m_muacincl	TRUE	TRUE	TRUE	0.85
TG.20.4_32.0.	14–21d	Postnatal	-4.53178	-7.93294	-1.13061	-4	0.00935897	0.076973	w_age;m_muacincl	TRUE	TRUE	TRUE	0.85
TG.20.4_32.1.	14–21d	Postnatal	-1.50025	-5.50331	2.50281	-3.44932	0.460037	0.726891	primiparity;code_bep_n;m_bmiincl;m_hbincl;GWG;w_age;m_heightincl;m_muacincl	FALSE
TG.20.4_32.2.	14–21d	Postnatal	-2.31709	-4.40914	-0.225036	-4	0.0301903	0.1577	m_bmiincl;m_hbincl;ga_days_incl;w_age;m_muacincl	TRUE
TG.20.4_33.2.	14–21d	Postnatal	0.000778399	-0.0723632	0.07392	0.128014	0.983246	0.990956	primiparity;code_bep_n;m_bmiincl;m_hbincl;ga_days_incl;GWG;w_age;m_heightincl;m_muacincl	FALSE
TG.20.4_34.0.	14–21d	Postnatal	-0.446183	-2.22259	1.33022	-0.93721	0.620356	0.839751	primiparity;m_bmiincl;m_hbincl;w_age;m_heightincl	FALSE
TG.20.4_34.1.	14–21d	Postnatal	2.60314	-4.51265	9.71893	4	0.470872	0.73357	primiparity;w_age;m_heightincl	FALSE
TG.20.4_34.2.	14–21d	Postnatal	-1.61779	-6.36246	3.12689	-3.72944	0.501441	0.74361	code_bep_n;m_bmiincl;m_hbincl;ga_days_incl;GWG;w_age;m_muacincl	FALSE
TG.20.4_34.3.	14–21d	Postnatal	0.338113	-0.283137	0.959363	0.931967	0.283857	0.565167	code_bep_n;m_bmiincl;m_hbincl;ga_days_incl;GWG;w_age;m_muacincl	FALSE	TRUE	FALSE	0.762238
TG.20.4_36.2.	14–21d	Postnatal	4.43736	-1.33984	10.2145	4	0.131192	0.366348	primiparity;w_age;m_muacincl	FALSE
TG.20.4_36.3.	14–21d	Postnatal	1.55425	-1.80052	4.90902	3.83034	0.361386	0.649617	primiparity;m_bmiincl;w_age;m_muacincl	FALSE
TG.20.4_36.4.	14–21d	Postnatal	0.507015	-0.951024	1.96505	1.3345	0.492998	0.739497	code_bep_n;m_bmiincl;m_hbincl;ga_days_incl;GWG;w_age;m_muacincl	FALSE
TG.20.4_36.5.	14–21d	Postnatal	0.299964	0.126685	0.473243	0.841048	0.000806234	0.0155638	m_hbincl;w_age	TRUE
TG.20.5_34.0.	14–21d	Postnatal	0.451824	-0.304077	1.20773	1.20297	0.239355	0.508486	primiparity;code_bep_n;m_bmiincl;m_hbincl;ga_days_incl;GWG;w_age;m_heightincl;m_muacincl	FALSE
TG.20.5_34.1.	14–21d	Postnatal	2.41762	-1.96473	6.79997	4	0.277333	0.560816	primiparity;code_bep_n;m_bmiincl;m_hbincl;ga_days_incl;GWG;w_age;m_heightincl;m_muacincl	FALSE
TG.20.5_34.2.	14–21d	Postnatal	2.19058	-1.39099	5.77216	4	0.228659	0.492838	primiparity;code_bep_n;m_bmiincl;m_hbincl;ga_days_incl;GWG;w_age;m_heightincl;m_muacincl	FALSE
TG.20.5_36.2.	14–21d	Postnatal	1.8354	0.138236	3.53256	4	0.0342376	0.173377	code_bep_n;m_bmiincl;ga_days_incl;GWG;m_heightincl;m_muacincl	TRUE	TRUE	FALSE	0.85
TG.20.5_36.3.	14–21d	Postnatal	1.40819	-0.0341833	2.85057	3.48224	0.0556063	0.211462	primiparity;code_bep_n;m_bmiincl;m_hbincl;ga_days_incl;GWG;w_age;m_heightincl	FALSE
TG.22.0_32.4.	14–21d	Postnatal	0.000982715	-0.0726151	0.0745806	0.128501	0.97898	0.990956	primiparity;code_bep_n;m_bmiincl;m_hbincl;ga_days_incl;GWG;w_age;m_heightincl;m_muacincl	FALSE
TG.22.1_32.5.	14–21d	Postnatal	0.0691896	0.027857	0.110522	0.291055	0.00117784	0.0186772	w_age	TRUE
TG.22.2_32.4.	14–21d	Postnatal	0.0035592	-0.096205	0.103323	0.134641	0.94388	0.990956	code_bep_n;m_bmiincl;m_hbincl;ga_days_incl;GWG;w_age;m_heightincl;m_muacincl	FALSE	TRUE	FALSE	0.85
TG.22.3_30.2.	14–21d	Postnatal	-0.0196937	-0.040429	0.0010416	0.0792234	0.062504	0.221402	code_bep_n;m_hbincl;ga_days_incl;GWG;w_age;m_muacincl	FALSE
TG.22.4_32.0.	14–21d	Postnatal	-0.584149	-0.998577	-0.169722	-1.26602	0.0060437	0.0638906	w_age;m_muacincl	TRUE
TG.22.4_32.2.	14–21d	Postnatal	-0.49159	-0.83153	-0.151649	-1.04542	0.00488488	0.0602468	m_hbincl;ga_days_incl;w_age;m_muacincl	TRUE	TRUE	TRUE	0.85
TG.22.4_34.2.	14–21d	Postnatal	-0.600021	-1.33008	0.130034	-1.30384	0.106463	0.310403	code_bep_n;m_bmiincl;m_hbincl;ga_days_incl;w_age;m_muacincl	FALSE
TG.22.5_32.0.	14–21d	Postnatal	-0.857991	-2.07391	0.357928	-1.91865	0.165234	0.424069	primiparity;code_bep_n;m_bmiincl;m_hbincl;ga_days_incl;GWG;w_age;m_heightincl;m_muacincl	FALSE	FALSE	TRUE	0.85
TG.22.5_32.1.	14–21d	Postnatal	-0.130716	-1.94016	1.67873	-0.185372	0.886655	0.990956	primiparity;code_bep_n;m_bmiincl;m_hbincl;ga_days_incl;GWG;w_age;m_heightincl	FALSE
TG.22.5_34.1.	14–21d	Postnatal	0.922935	-1.74989	3.59576	2.32575	0.496008	0.741507	primiparity;code_bep_n;m_bmiincl;m_hbincl;ga_days_incl;GWG;m_heightincl;m_muacincl	FALSE
TG.22.5_34.2.	14–21d	Postnatal	0.341869	-1.99166	2.6754	0.94092	0.772548	0.917143	primiparity;code_bep_n;m_bmiincl;m_hbincl;ga_days_incl;GWG;w_age;m_heightincl;m_muacincl	FALSE	TRUE	FALSE	0.677686
TG.22.5_34.3.	14–21d	Postnatal	0.137315	-0.153362	0.427992	0.453415	0.351989	0.63789	primiparity;code_bep_n;m_bmiincl;m_hbincl;ga_days_incl;GWG;w_age;m_heightincl;m_muacincl	FALSE
TG.22.6_32.0.	14–21d	Postnatal	0.138611	-4.0059	4.28312	0.456504	0.947383	0.990956	primiparity;code_bep_n;m_bmiincl;m_hbincl;ga_days_incl;GWG;w_age;m_heightincl;m_muacincl	FALSE	TRUE	FALSE	0.85
TG.22.6_32.1.	14–21d	Postnatal	2.55729	-4.60181	9.7164	4	0.48128	0.734324	primiparity;code_bep_n;m_bmiincl;m_hbincl;ga_days_incl;GWG;w_age;m_heightincl;m_muacincl	FALSE
TG.22.6_34.1.	14–21d	Postnatal	6.65367	-6.81012	20.1175	4	0.330287	0.613588	primiparity;code_bep_n;m_bmiincl;m_hbincl;ga_days_incl;GWG;w_age;m_heightincl;m_muacincl	FALSE
TG.22.6_34.2.	14–21d	Postnatal	4.0105	-8.68181	16.7028	4	0.533234	0.771323	primiparity;code_bep_n;m_bmiincl;m_hbincl;ga_days_incl;GWG;w_age;m_heightincl;m_muacincl	FALSE
TG.22.6_34.3.	14–21d	Postnatal	0.984494	-0.434329	2.40332	2.47246	0.17234	0.42748	primiparity;code_bep_n;m_bmiincl;m_hbincl;ga_days_incl;GWG;w_age;m_heightincl;m_muacincl	FALSE
Hex3Cer.d18.1.16.0.	14–21d	Postnatal	-0.00850119	-0.0363237	0.0193213	0.105898	0.546847	0.780708	primiparity;m_bmiincl;m_hbincl;ga_days_incl;w_age;m_muacincl	FALSE
Choline	14–21d	Postnatal	-19.5204	-41.1527	2.11184	-4	0.0766002	0.248587	m_bmiincl;GWG;w_age;m_muacincl	FALSE
C0	1–2m	Pre+Postnatal	-1.41001	-4.61764	1.79763	-3.23425	0.386177	0.463413	primiparity;code_bep_n;m_bmiincl;m_hbincl;ga_days_incl;GWG;w_age;m_heightincl;m_muacincl	FALSE
C2	1–2m	Pre+Postnatal	-0.316426	-2.85489	2.22204	-0.627964	0.805651	0.839693	primiparity;code_bep_n;m_bmiincl;ga_days_incl;GWG;w_age;m_heightincl;m_muacincl	FALSE
C3	1–2m	Pre+Postnatal	-0.0777769	-0.19682	0.0412665	-0.0592036	0.198574	0.272963	primiparity;GWG;m_heightincl	FALSE
C4	1–2m	Pre+Postnatal	-0.0541986	-0.228669	0.120272	-0.00301045	0.54003	0.61011	code_bep_n;m_bmiincl;m_hbincl;ga_days_incl;GWG;w_age;m_muacincl	FALSE
C6..C4.1.DC.	1–2m	Pre+Postnatal	-0.0132934	-0.0444975	0.0179107	0.0944769	0.400983	0.476033	primiparity;m_bmiincl;m_hbincl;ga_days_incl;GWG;w_age;m_muacincl	FALSE
C12	1–2m	Pre+Postnatal	-0.100092	-0.282673	0.0824885	-0.112387	0.280196	0.358522	primiparity;code_bep_n;m_bmiincl;m_hbincl;ga_days_incl;GWG;w_age;m_heightincl;m_muacincl	FALSE
C12.1	1–2m	Pre+Postnatal	-0.0208215	-0.0479158	0.00627283	0.0765356	0.130919	0.198389	code_bep_n;m_bmiincl;m_hbincl;GWG;w_age	FALSE
C14	1–2m	Pre+Postnatal	-0.133491	-0.396391	0.129409	-0.191984	0.317135	0.391134	primiparity;m_hbincl;w_age;m_heightincl	FALSE
C14.2.OH	1–2m	Pre+Postnatal	-0.00123953	-0.00861679	0.00613772	0.123204	0.740183	0.786223	primiparity;code_bep_n;m_hbincl;ga_days_incl;GWG;w_age;m_heightincl;m_muacincl	FALSE
C18	1–2m	Pre+Postnatal	-0.00545471	-0.0106836	-0.000225806	0.113159	0.0410153	0.0941006	code_bep_n;m_hbincl;m_muacincl	TRUE
TMAO	1–2m	Pre+Postnatal	-0.696367	-1.55123	0.158501	-1.53346	0.109532	0.174308	m_bmiincl;ga_days_incl;w_age;m_muacincl	FALSE
X1.Met.His	1–2m	Pre+Postnatal	0.0971509	-0.019938	0.21424	0.357694	0.10314	0.165921	primiparity;code_bep_n;m_bmiincl;m_hbincl;ga_days_incl;w_age;m_heightincl;m_muacincl	FALSE
X3.Met.His	1–2m	Pre+Postnatal	0.366572	-0.0342946	0.767439	0.999793	0.0727687	0.128212	GWG	FALSE	TRUE	FALSE	0.607639
AABA	1–2m	Pre+Postnatal	0.0440618	-0.931628	1.01975	0.231169	0.928963	0.94969	primiparity;code_bep_n;m_bmiincl;m_hbincl;ga_days_incl;GWG;w_age;m_heightincl;m_muacincl	FALSE
alpha.AAA	1–2m	Pre+Postnatal	0.331009	-0.418603	1.08062	0.915038	0.384131	0.462206	primiparity;GWG;w_age	FALSE
Cit	1–2m	Pre+Postnatal	-0.303804	-2.42458	1.81698	-0.597882	0.777365	0.819834	primiparity;code_bep_n;m_bmiincl;m_hbincl;ga_days_incl;GWG;w_age;m_heightincl;m_muacincl	FALSE
Creatinine	1–2m	Pre+Postnatal	0.905934	-1.74987	3.56174	2.28523	0.501071	0.579363	primiparity;code_bep_n;m_bmiincl;m_hbincl;ga_days_incl;GWG;w_age;m_muacincl	FALSE
Cystine	1–2m	Pre+Postnatal	0.103438	-6.89228	7.09916	0.372678	0.976714	0.987089	primiparity;code_bep_n;m_bmiincl;m_hbincl;ga_days_incl;GWG;w_age;m_heightincl;m_muacincl	FALSE
HArg	1–2m	Pre+Postnatal	-0.00077845	-0.0188563	0.0172994	0.124303	0.932256	0.94969	primiparity;code_bep_n;m_bmiincl;m_hbincl;ga_days_incl;GWG;w_age;m_heightincl;m_muacincl	FALSE
Kynurenine	1–2m	Pre+Postnatal	0.113839	-0.060739	0.288418	0.397467	0.199388	0.273236	primiparity;code_bep_n;m_bmiincl;m_hbincl;ga_days_incl;w_age;m_heightincl;m_muacincl	FALSE
Met.SO	1–2m	Pre+Postnatal	-0.0505373	-0.186031	0.0849561	0.00571531	0.462045	0.541288	code_bep_n;m_bmiincl;ga_days_incl;GWG;w_age;m_heightincl	FALSE
Orn	1–2m	Pre+Postnatal	-0.274747	-1.22334	0.673844	-0.528633	0.567724	0.634936	primiparity;code_bep_n;m_bmiincl;m_hbincl;ga_days_incl;GWG;m_heightincl;m_muacincl	FALSE
ProBetaine	1–2m	Pre+Postnatal	-0.00879022	-0.131822	0.114241	0.105209	0.887838	0.916744	primiparity;code_bep_n;m_bmiincl;m_hbincl;ga_days_incl;GWG;w_age;m_heightincl;m_muacincl	FALSE
SDMA	1–2m	Pre+Postnatal	-0.00296053	-0.0201155	0.0141944	0.119103	0.733393	0.780879	primiparity;code_bep_n;m_bmiincl;m_hbincl;ga_days_incl;GWG;w_age;m_heightincl;m_muacincl	FALSE
t4.OH.Pro	1–2m	Pre+Postnatal	-0.318388	-1.88771	1.25093	-0.63264	0.688893	0.744206	primiparity;code_bep_n;m_hbincl;ga_days_incl;GWG;w_age;m_heightincl	FALSE
Taurine	1–2m	Pre+Postnatal	53.3337	15.1297	91.5376	4	0.00655394	0.0618847	primiparity;w_age	TRUE
TrpBetaine	1–2m	Pre+Postnatal	0.0840315	-0.511977	0.68004	0.326427	0.780786	0.821491	primiparity;code_bep_n;m_bmiincl;m_hbincl;ga_days_incl;GWG;w_age;m_heightincl;m_muacincl	FALSE
Ala	1–2m	Pre+Postnatal	13.0454	-28.549	54.6398	4	0.536125	0.608796	primiparity;code_bep_n;m_bmiincl;m_hbincl;ga_days_incl;w_age;m_heightincl;m_muacincl	FALSE
Arg	1–2m	Pre+Postnatal	-1.32534	-3.64199	0.99131	-3.03247	0.259899	0.338402	primiparity;m_bmiincl;m_hbincl;GWG;w_age;m_muacincl	FALSE
Asn	1–2m	Pre+Postnatal	-0.257591	-6.26795	5.75277	-0.487746	0.932578	0.94969	primiparity;code_bep_n;m_hbincl;ga_days_incl;GWG;w_age;m_heightincl;m_muacincl	FALSE
Asp	1–2m	Pre+Postnatal	-1.51385	-18.062	15.0343	-3.48172	0.856715	0.8896	primiparity;m_bmiincl;m_hbincl;ga_days_incl;m_muacincl	FALSE
Cys	1–2m	Pre+Postnatal	-1.70705	-4.42978	1.01568	-3.94218	0.217206	0.293129	m_bmiincl;w_age;m_muacincl	FALSE
Gln	1–2m	Pre+Postnatal	31.4426	-69.3427	132.228	4	0.538259	0.609661	primiparity;code_bep_n;m_bmiincl;m_hbincl;ga_days_incl;GWG;w_age;m_heightincl;m_muacincl	FALSE
Glu	1–2m	Pre+Postnatal	-38.3321	-182.828	106.164	-4	0.600672	0.666746	primiparity;code_bep_n;m_bmiincl;m_hbincl;ga_days_incl;GWG;w_age;m_heightincl;m_muacincl	FALSE
Gly	1–2m	Pre+Postnatal	-0.515388	-22.8768	21.846	-1.10214	0.963709	0.979146	primiparity;code_bep_n;m_bmiincl;m_hbincl;ga_days_incl;GWG;w_age;m_heightincl;m_muacincl	FALSE
His	1–2m	Pre+Postnatal	3.29788	-0.786527	7.38229	4	0.112637	0.177343	primiparity;code_bep_n;m_bmiincl;m_hbincl;ga_days_incl;w_age;m_heightincl;m_muacincl	FALSE
Ile	1–2m	Pre+Postnatal	0.193842	-1.09633	1.48401	0.588132	0.766829	0.810648	primiparity;m_bmiincl;m_hbincl;GWG;w_age;m_muacincl	FALSE
Leu	1–2m	Pre+Postnatal	-1.55366	-4.71329	1.60597	-3.5766	0.332555	0.407885	primiparity;m_bmiincl;m_hbincl;GWG;w_age;m_heightincl;m_muacincl	FALSE
Lys	1–2m	Pre+Postnatal	-0.785967	-3.46077	1.88884	-1.747	0.562105	0.630239	primiparity;code_bep_n;m_bmiincl;m_hbincl;ga_days_incl;GWG;w_age;m_heightincl;m_muacincl	FALSE
Met	1–2m	Pre+Postnatal	-0.107594	-0.945233	0.730046	-0.130265	0.799847	0.837575	primiparity;code_bep_n;m_bmiincl;m_hbincl;ga_days_incl;GWG;w_age;m_heightincl;m_muacincl	FALSE
Phe	1–2m	Pre+Postnatal	-0.152363	-2.05811	1.75338	-0.236962	0.874608	0.905189	primiparity;code_bep_n;ga_days_incl;GWG;w_age;m_heightincl;m_muacincl	FALSE
Pro	1–2m	Pre+Postnatal	0.621983	-4.12688	5.37085	1.6085	0.796018	0.835537	primiparity;code_bep_n;m_hbincl;GWG;w_age;m_heightincl;m_muacincl	FALSE
Ser	1–2m	Pre+Postnatal	6.50061	-12.8726	25.8738	4	0.508132	0.584484	primiparity;code_bep_n;m_hbincl;ga_days_incl;w_age	FALSE
Thr	1–2m	Pre+Postnatal	2.33687	-7.95437	12.6281	4	0.654076	0.717061	primiparity;code_bep_n;m_bmiincl;m_hbincl;ga_days_incl;GWG;w_age;m_heightincl;m_muacincl	FALSE
Trp	1–2m	Pre+Postnatal	0.228278	-0.207846	0.664401	0.670202	0.30242	0.381739	primiparity;code_bep_n;m_bmiincl;m_hbincl;ga_days_incl;GWG;w_age;m_heightincl;m_muacincl	FALSE
Tyr	1–2m	Pre+Postnatal	0.0153753	-2.12037	2.15112	0.162802	0.988662	0.988662	primiparity;m_bmiincl;m_hbincl;ga_days_incl;GWG;w_age;m_muacincl	FALSE
Val	1–2m	Pre+Postnatal	0.0311103	-3.9814	4.04362	0.200302	0.987789	0.988662	primiparity;code_bep_n;m_bmiincl;m_hbincl;ga_days_incl;w_age;m_heightincl	FALSE
beta.Ala	1–2m	Pre+Postnatal	0.346765	0.14941	0.544119	0.952587	0.000682388	0.0454939	GWG	TRUE	FALSE	TRUE	0.646199
GABA	1–2m	Pre+Postnatal	0.146136	-0.0271633	0.319435	0.474437	0.097717	0.158924	m_hbincl;w_age	FALSE
Putrescine	1–2m	Pre+Postnatal	-0.179941	-0.395813	0.0359298	-0.302687	0.101581	0.164008	primiparity;m_bmiincl;m_hbincl;w_age;m_muacincl	FALSE
Spermidine	1–2m	Pre+Postnatal	-1.1228	-2.18205	-0.0635427	-2.54975	0.0379168	0.0904194	primiparity;m_bmiincl;m_hbincl;w_age;m_muacincl	TRUE
Spermine	1–2m	Pre+Postnatal	-1.08295	-2.00033	-0.165568	-2.45479	0.0210357	0.0701123	primiparity;m_bmiincl;m_hbincl;GWG;w_age;m_muacincl	TRUE
H1	1–2m	Pre+Postnatal	47.3677	-76.7895	171.525	4	0.451873	0.530772	primiparity;code_bep_n;ga_days_incl;GWG;w_age;m_heightincl;m_muacincl	FALSE
AconAcid	1–2m	Pre+Postnatal	-0.00866011	-0.868918	0.851598	0.105519	0.984145	0.988598	primiparity;m_bmiincl;m_hbincl;ga_days_incl;GWG;w_age;m_muacincl	FALSE
HipAcid	1–2m	Pre+Postnatal	-5.75884	-13.0867	1.569	-4	0.122512	0.187983	GWG	FALSE	FALSE	TRUE	0.646199
HipAcid	1–2m	Pre+Postnatal	-5.75884	-13.0867	1.569	-4	0.122512	0.187983	GWG	FALSE	TRUE	TRUE	0.86715
OH.GlutAcid	1–2m	Pre+Postnatal	-0.146891	-0.312367	0.0185848	-0.22392	0.0814291	0.139593	primiparity;code_bep_n;m_bmiincl;m_hbincl;ga_days_incl;w_age;m_heightincl;m_muacincl	FALSE	TRUE	FALSE	0.607639
Cer.d16.1.20.0.	1–2m	Pre+Postnatal	-0.0338373	-0.0735418	0.00586728	0.0455157	0.0942273	0.154115	m_bmiincl;m_hbincl;GWG;m_muacincl	FALSE
Cer.d16.1.22.0.	1–2m	Pre+Postnatal	-0.0614391	-0.159309	0.0364304	-0.0202665	0.216607	0.293129	primiparity;m_bmiincl;m_hbincl;m_muacincl	FALSE
Cer.d16.1.24.0.	1–2m	Pre+Postnatal	-0.0685914	-0.123821	-0.0133617	-0.0373121	0.0152943	0.0679055		TRUE
Cer.d18.1.14.0.	1–2m	Pre+Postnatal	-0.0655027	-0.120394	-0.0106109	-0.029951	0.0196995	0.0699725	primiparity;m_hbincl;GWG;w_age	TRUE
Cer.d18.1.16.0.	1–2m	Pre+Postnatal	-0.0738784	-0.141388	-0.00636894	-0.0499125	0.032196	0.0848834	primiparity;GWG;w_age	TRUE
Cer.d18.1.18.0.	1–2m	Pre+Postnatal	-0.116714	-0.207202	-0.0262251	-0.151999	0.011847	0.0641471	GWG;w_age	TRUE	TRUE	FALSE	0.646199
Cer.d18.1.20.0.OH..	1–2m	Pre+Postnatal	-0.28573	-0.53116	-0.0403007	-0.55481	0.0228328	0.0717457	primiparity;m_hbincl;w_age;m_muacincl	TRUE
Cer.d18.1.20.0.	1–2m	Pre+Postnatal	-0.11142	-0.197761	-0.0250787	-0.139383	0.0118031	0.0641471	GWG	TRUE
Cer.d18.1.22.0.	1–2m	Pre+Postnatal	-0.23386	-0.447702	-0.0200181	-0.431189	0.0323092	0.0848834	m_hbincl;GWG;m_muacincl	TRUE
Cer.d18.1.23.0.	1–2m	Pre+Postnatal	-0.0373191	-0.077648	0.00300969	0.0372175	0.069451	0.125251	m_hbincl;GWG	FALSE
Cer.d18.1.24.0.	1–2m	Pre+Postnatal	-0.618522	-1.09002	-0.147021	-1.34794	0.0105093	0.0632094	m_hbincl;GWG	TRUE
Cer.d18.1.24.1.	1–2m	Pre+Postnatal	-0.209066	-0.513128	0.0949967	-0.372099	0.17618	0.24659	primiparity;m_hbincl;GWG;w_age;m_muacincl	FALSE
Cer.d18.2.20.0.	1–2m	Pre+Postnatal	-0.0115308	-0.0337131	0.0106516	0.0986777	0.305806	0.383554	m_bmiincl;m_hbincl;GWG;m_heightincl;m_muacincl	FALSE
Cer.d18.2.22.0.	1–2m	Pre+Postnatal	-0.0188737	-0.0550487	0.0173014	0.0811777	0.304089	0.38248	m_hbincl;GWG	FALSE
Cer.d18.2.24.0.	1–2m	Pre+Postnatal	-0.04909	-0.0967686	-0.00141141	0.00916457	0.0436784	0.0947226	m_hbincl	TRUE
Cer.d18.2.24.1.	1–2m	Pre+Postnatal	-0.0045919	-0.0272095	0.0180257	0.115215	0.688674	0.744206	primiparity;code_bep_n;m_hbincl;ga_days_incl;GWG;w_age;m_heightincl;m_muacincl	FALSE
CE.14.0.	1–2m	Pre+Postnatal	-0.299154	-0.720405	0.122097	-0.586801	0.162529	0.234295	primiparity;m_muacincl	FALSE
CE.16.0.	1–2m	Pre+Postnatal	-0.415944	-0.741898	-0.0899908	-0.865142	0.0127524	0.0662804		TRUE
CE.18.0.	1–2m	Pre+Postnatal	-0.118491	-0.232288	-0.00469427	-0.156236	0.0413857	0.0941006	m_bmiincl;m_muacincl	TRUE
CE.18.1.	1–2m	Pre+Postnatal	-0.361059	-0.719814	-0.00230488	-0.734337	0.0485664	0.100764	primiparity;m_bmiincl;ga_days_incl;w_age;m_muacincl	TRUE
CE.18.2.	1–2m	Pre+Postnatal	-0.274769	-0.721253	0.171715	-0.528686	0.22574	0.301893	m_hbincl;GWG;w_age;m_muacincl	FALSE
CE.18.3.	1–2m	Pre+Postnatal	0.0122883	-0.00790827	0.0324849	0.155445	0.231027	0.307114	primiparity;w_age;m_muacincl	FALSE
CE.20.4.	1–2m	Pre+Postnatal	-0.0295257	-0.0816429	0.0225916	0.0557914	0.264595	0.342508	primiparity;code_bep_n;m_hbincl;m_heightincl	FALSE
CE.22.6.	1–2m	Pre+Postnatal	-0.0103645	-0.0399238	0.0191948	0.101457	0.489221	0.568623	primiparity;code_bep_n;m_bmiincl;m_hbincl;ga_days_incl;GWG;m_heightincl;m_muacincl	FALSE
p.Cresol.SO4	1–2m	Pre+Postnatal	0.0846747	-0.434075	0.603424	0.32796	0.747334	0.791925	code_bep_n;m_bmiincl;m_hbincl;ga_days_incl;GWG;w_age;m_heightincl;m_muacincl	FALSE
DG.14.0_18.1.	1–2m	Pre+Postnatal	-3.54418	-8.93232	1.84395	-4	0.195516	0.269594	primiparity;code_bep_n;m_bmiincl;m_hbincl;GWG;w_age;m_heightincl;m_muacincl	FALSE
DG.14.0_18.2.	1–2m	Pre+Postnatal	-6.1084	-13.6638	1.44702	-4	0.112195	0.177276	m_bmiincl;m_hbincl;GWG;m_muacincl	FALSE
DG.16.0_16.1.	1–2m	Pre+Postnatal	-0.763341	-1.28221	-0.244471	-1.69308	0.00423729	0.0526879	primiparity;code_bep_n;m_bmiincl;m_hbincl;ga_days_incl;GWG;w_age;m_heightincl;m_muacincl	TRUE	TRUE	TRUE	0.646199
DG.16.0_18.1.	1–2m	Pre+Postnatal	-4.94503	-10.0771	0.187052	-4	0.0588269	0.112233	primiparity;code_bep_n;m_bmiincl;m_hbincl;ga_days_incl;GWG;m_heightincl;m_muacincl	FALSE
DG.16.0_18.2.	1–2m	Pre+Postnatal	-5.94726	-10.6709	-1.2236	-4	0.0139888	0.0679055	primiparity;code_bep_n;m_bmiincl;m_hbincl;ga_days_incl;GWG;m_heightincl;m_muacincl	TRUE
DG.16.0_20.3.	1–2m	Pre+Postnatal	-0.169372	-0.352532	0.013788	-0.277498	0.0696324	0.125251	primiparity;code_bep_n;m_bmiincl;m_hbincl;ga_days_incl;GWG;w_age;m_heightincl;m_muacincl	FALSE
DG.16.1_18.0.	1–2m	Pre+Postnatal	-0.0830856	-0.132188	-0.0339832	-0.0718556	0.00106168	0.047041	primiparity;code_bep_n;m_bmiincl;m_hbincl;ga_days_incl;GWG;w_age;m_heightincl;m_muacincl	TRUE
DG.16.1_18.1.	1–2m	Pre+Postnatal	-0.614445	-1.06404	-0.164848	-1.33822	0.00776165	0.0618847	primiparity;code_bep_n;m_bmiincl;m_hbincl;ga_days_incl;GWG;w_age;m_heightincl;m_muacincl	TRUE
DG.16.1_18.2.	1–2m	Pre+Postnatal	-0.825758	-1.31922	-0.332292	-1.84183	0.00120011	0.047041	primiparity;code_bep_n;m_bmiincl;m_hbincl;ga_days_incl;GWG;w_age;m_heightincl;m_muacincl	TRUE
DG.17.0_18.1.	1–2m	Pre+Postnatal	-0.208069	-0.360445	-0.0556933	-0.369723	0.00780703	0.0618847	primiparity;code_bep_n;m_hbincl;ga_days_incl;GWG;w_age;m_heightincl	TRUE
DG.18.1_18.1.	1–2m	Pre+Postnatal	-0.464341	-1.47064	0.541958	-0.980484	0.363093	0.440568	primiparity;code_bep_n;m_hbincl;ga_days_incl;GWG;w_age;m_heightincl;m_muacincl	FALSE
DG.18.1_18.2.	1–2m	Pre+Postnatal	-3.74405	-7.60795	0.119852	-4	0.0574368	0.110878	primiparity;code_bep_n;m_hbincl;GWG;m_heightincl	FALSE	TRUE	FALSE	0.607639
DG.18.1_18.3.	1–2m	Pre+Postnatal	0.298375	-0.0010591	0.597809	0.837262	0.0508046	0.102747	primiparity;code_bep_n;m_hbincl;GWG;m_heightincl	FALSE	TRUE	TRUE	0.86715
DG.18.1_20.1.	1–2m	Pre+Postnatal	-0.00414562	-0.0140728	0.00578158	0.116278	0.410345	0.484556	m_bmiincl;m_hbincl;ga_days_incl;GWG;w_age;m_muacincl	FALSE
DG.18.1_20.2.	1–2m	Pre+Postnatal	-0.104301	-0.183001	-0.0256005	-0.122416	0.0097583	0.0632094	m_hbincl;w_age	TRUE
DG.18.1_20.3.	1–2m	Pre+Postnatal	-0.0361564	-0.0777207	0.00540789	0.0399886	0.0876553	0.146864	primiparity;code_bep_n;m_bmiincl;m_hbincl;ga_days_incl;GWG;m_heightincl;m_muacincl	FALSE
DG.18.1_22.6.	1–2m	Pre+Postnatal	-0.756782	-1.44091	-0.0726567	-1.67744	0.0304085	0.0836426	primiparity;m_bmiincl;ga_days_incl;GWG;w_age;m_muacincl	TRUE
DG.18.2_18.2.	1–2m	Pre+Postnatal	-4.938	-8.96174	-0.914259	-4	0.0165351	0.0679055	primiparity;code_bep_n;m_bmiincl;m_hbincl;GWG;m_muacincl	TRUE
DG.18.2_18.3.	1–2m	Pre+Postnatal	0.296654	-0.120157	0.713465	0.833161	0.161557	0.233652	primiparity;code_bep_n;m_bmiincl;m_hbincl;GWG;w_age;m_heightincl;m_muacincl	FALSE
DG.18.3_20.2.	1–2m	Pre+Postnatal	-0.00551639	-0.0137494	0.00271661	0.113012	0.187419	0.259234	m_bmiincl;GWG;m_muacincl	FALSE
Hex2Cer.d18.1.14.0.	1–2m	Pre+Postnatal	-0.00931001	-0.0228298	0.00420976	0.10397	0.17555	0.24659	m_bmiincl;m_hbincl;m_muacincl	FALSE
Hex2Cer.d18.1.16.0.	1–2m	Pre+Postnatal	0.111641	-0.109535	0.332818	0.392228	0.319995	0.393567	m_bmiincl;GWG;w_age;m_muacincl	FALSE
Hex2Cer.d18.1.18.0.	1–2m	Pre+Postnatal	-0.0403203	-0.0801176	-0.000523068	0.0300649	0.0471037	0.0998128	GWG;m_muacincl	TRUE
Hex2Cer.d18.1.20.0.	1–2m	Pre+Postnatal	-0.0548509	-0.121786	0.0120845	-0.00456518	0.107458	0.172243	GWG;w_age	FALSE
Hex2Cer.d18.1.22.0.	1–2m	Pre+Postnatal	-0.0945088	-0.230551	0.0415333	-0.0990799	0.171793	0.243784	primiparity;m_hbincl;GWG	FALSE
Hex2Cer.d18.1.24.0.	1–2m	Pre+Postnatal	-0.168892	-0.338899	0.00111458	-0.276354	0.0515002	0.103	primiparity;GWG	FALSE
Hex2Cer.d18.1.24.1.	1–2m	Pre+Postnatal	0.0662495	-0.0640273	0.196526	0.284048	0.31639	0.391134	m_bmiincl;m_hbincl;GWG;w_age;m_muacincl	FALSE
AA	1–2m	Pre+Postnatal	-2.62593	-5.36918	0.117311	-4	0.0604835	0.113311	primiparity;m_bmiincl;m_hbincl;GWG;w_age;m_muacincl	FALSE	TRUE	FALSE	0.607639
DHA	1–2m	Pre+Postnatal	-0.565212	-2.30174	1.17132	-1.22089	0.520857	0.597259	primiparity;code_bep_n;m_bmiincl;m_hbincl;ga_days_incl;GWG;m_heightincl;m_muacincl	FALSE
EPA	1–2m	Pre+Postnatal	0.206849	-0.955304	1.369	0.619131	0.72537	0.774567	primiparity;code_bep_n;m_bmiincl;m_hbincl;ga_days_incl;GWG;w_age;m_heightincl;m_muacincl	FALSE
FA.12.0.	1–2m	Pre+Postnatal	-121.797	-329.065	85.4722	-4	0.24726	0.324803	primiparity;code_bep_n;m_bmiincl;m_hbincl;GWG;m_muacincl	FALSE
FA.14.0.	1–2m	Pre+Postnatal	169.6	-197.568	536.769	4	0.362673	0.440568	m_hbincl;GWG;m_muacincl	FALSE
FA.18.1.	1–2m	Pre+Postnatal	-30.0337	-94.6877	34.6202	-4	0.359892	0.440198	primiparity;code_bep_n;m_bmiincl;m_hbincl;ga_days_incl;GWG;m_heightincl;m_muacincl	FALSE
FA.18.2.	1–2m	Pre+Postnatal	-22.02	-46.4439	2.40377	-4	0.0768339	0.133241	m_bmiincl;m_hbincl;GWG;m_muacincl	FALSE
FA.20.2.	1–2m	Pre+Postnatal	-2.20653	-4.40855	-0.00450693	-4	0.0495395	0.101906	primiparity;code_bep_n;m_bmiincl;m_hbincl;ga_days_incl;GWG;m_heightincl;m_muacincl	TRUE
FA.20.3.	1–2m	Pre+Postnatal	-0.581772	-2.40752	1.24398	-1.26035	0.529617	0.604499	primiparity;code_bep_n;m_bmiincl;m_hbincl;ga_days_incl;GWG;w_age;m_heightincl;m_muacincl	FALSE
HexCer.d16.1.22.0.	1–2m	Pre+Postnatal	-0.0101566	-0.019765	-0.000548169	0.101953	0.0384394	0.0907823	m_hbincl	TRUE
HexCer.d16.1.24.0.	1–2m	Pre+Postnatal	-0.015621	-0.0281929	-0.00304906	0.0889297	0.0152541	0.0679055	primiparity;m_bmiincl;m_muacincl	TRUE
HexCer.d18.1.14.0.	1–2m	Pre+Postnatal	-0.0255883	-0.0568746	0.00569795	0.0651751	0.108126	0.172691	m_bmiincl;m_hbincl;m_muacincl	FALSE
HexCer.d18.1.16.0.	1–2m	Pre+Postnatal	-0.0552394	-0.111393	0.000913665	-0.00549106	0.0537928	0.105216	m_hbincl;GWG;w_age	FALSE
HexCer.d18.1.18.0.	1–2m	Pre+Postnatal	-0.0542942	-0.103549	-0.00503946	-0.00323826	0.0309776	0.0843807	m_hbincl	TRUE
HexCer.d18.1.20.0.	1–2m	Pre+Postnatal	-0.109015	-0.211952	-0.0060778	-0.133651	0.038082	0.0904194	m_hbincl;GWG	TRUE
HexCer.d18.1.22.0.	1–2m	Pre+Postnatal	-0.6457	-1.19851	-0.0928888	-1.41271	0.022395	0.071535	m_hbincl;GWG;m_muacincl	TRUE
HexCer.d18.1.23.0.	1–2m	Pre+Postnatal	-0.10379	-0.188647	-0.0189321	-0.121199	0.0168854	0.0679055	m_hbincl;GWG	TRUE
HexCer.d18.1.24.0.	1–2m	Pre+Postnatal	-0.848359	-1.42273	-0.273983	-1.8957	0.00408775	0.0526879	primiparity;m_bmiincl;m_hbincl;GWG;w_age;m_muacincl	TRUE
HexCer.d18.1.24.1.	1–2m	Pre+Postnatal	-0.939011	-1.88136	0.00333241	-2.11174	0.0508045	0.102747	code_bep_n;m_hbincl;w_age;m_heightincl	FALSE
HexCer.d18.1.26.0.	1–2m	Pre+Postnatal	-0.00875089	-0.0182673	0.00076555	0.105303	0.0712026	0.125952	m_hbincl	FALSE
HexCer.d18.1.26.1.	1–2m	Pre+Postnatal	-0.0182746	-0.0468072	0.010258	0.0826055	0.20748	0.282581	code_bep_n;m_bmiincl;m_hbincl;ga_days_incl;m_heightincl;m_muacincl	FALSE
HexCer.d18.2.16.0.	1–2m	Pre+Postnatal	-0.00163484	-0.00385355	0.000583881	0.122262	0.147419	0.21891	m_hbincl;w_age	FALSE
HexCer.d18.2.18.0.	1–2m	Pre+Postnatal	-0.00607494	-0.0121764	2.65138e-05	0.11168	0.0509902	0.102747	code_bep_n;m_hbincl;m_heightincl	FALSE
HexCer.d18.2.20.0.	1–2m	Pre+Postnatal	-0.0108987	-0.0210774	-0.00071998	0.100184	0.0360384	0.0891367	code_bep_n;m_hbincl;GWG;m_heightincl	TRUE
HexCer.d18.2.22.0.	1–2m	Pre+Postnatal	-0.119815	-0.252277	0.0126469	-0.159391	0.0758915	0.132999	m_hbincl;GWG	FALSE
HexCer.d18.2.23.0.	1–2m	Pre+Postnatal	-0.0144431	-0.0289225	3.62215e-05	0.0917369	0.0505679	0.102747	m_hbincl;ga_days_incl;GWG;m_heightincl	FALSE
HexCer.d18.2.24.0.	1–2m	Pre+Postnatal	-0.343847	-0.594769	-0.0929252	-0.693317	0.0075916	0.0618847	m_hbincl;GWG;w_age;m_muacincl	TRUE	TRUE	FALSE	0.607639
Ind.SO4	1–2m	Pre+Postnatal	0.0486137	0.00868521	0.0885421	0.242017	0.0173806	0.0679055	m_bmiincl	TRUE
lysoPC.a.C14.0	1–2m	Pre+Postnatal	0.100086	-0.198015	0.398187	0.364689	0.507842	0.584484	primiparity;m_bmiincl;m_hbincl;ga_days_incl;w_age;m_muacincl	FALSE
lysoPC.a.C16.0	1–2m	Pre+Postnatal	-0.108074	-0.41617	0.200023	-0.131409	0.489081	0.568623	code_bep_n;m_hbincl;ga_days_incl;GWG;w_age;m_heightincl	FALSE
lysoPC.a.C18.0	1–2m	Pre+Postnatal	-0.124626	-0.362787	0.113535	-0.170857	0.30264	0.381739	code_bep_n;m_bmiincl;w_age;m_muacincl	FALSE
lysoPC.a.C18.1	1–2m	Pre+Postnatal	-0.0552309	-0.182129	0.0716671	-0.00547067	0.390912	0.465322	primiparity;code_bep_n;m_hbincl;ga_days_incl;GWG;w_age;m_heightincl	FALSE
lysoPC.a.C18.2	1–2m	Pre+Postnatal	-0.598284	-1.22824	0.0316684	-1.2997	0.0625048	0.116606	primiparity;ga_days_incl;GWG;m_muacincl	FALSE
lysoPC.a.C20.4	1–2m	Pre+Postnatal	-0.0288449	-0.0607675	0.00307765	0.0574137	0.0761777	0.132999	primiparity;code_bep_n;m_bmiincl;ga_days_incl;GWG;w_age;m_heightincl;m_muacincl	FALSE
lysoPC.a.C26.1	1–2m	Pre+Postnatal	-0.0130466	-0.0498557	0.0237626	0.0950652	0.484569	0.56618	primiparity;m_bmiincl;m_hbincl;GWG;m_muacincl	FALSE
PC.aa.C28.1	1–2m	Pre+Postnatal	-0.0806408	-0.187572	0.0262906	-0.0660289	0.138212	0.207211	code_bep_n;m_bmiincl;m_hbincl;m_muacincl	FALSE	TRUE	FALSE	0.607639
PC.aa.C30.0	1–2m	Pre+Postnatal	-0.318331	-0.774872	0.138209	-0.632506	0.170214	0.243007	primiparity;m_bmiincl;m_hbincl;m_muacincl	FALSE
PC.aa.C32.0	1–2m	Pre+Postnatal	-0.968771	-2.06966	0.132116	-2.18267	0.0840831	0.143038	code_bep_n;m_bmiincl;m_hbincl;GWG;m_heightincl;m_muacincl	FALSE
PC.aa.C32.1	1–2m	Pre+Postnatal	-0.105315	-0.245855	0.0352252	-0.124834	0.140706	0.209643	primiparity;m_hbincl;w_age	FALSE
PC.aa.C32.2	1–2m	Pre+Postnatal	-0.0684842	-0.139578	0.00260937	-0.0370567	0.0588969	0.112233	primiparity;m_hbincl;w_age	FALSE
PC.aa.C32.3	1–2m	Pre+Postnatal	-0.00259386	-0.00768825	0.00250054	0.119977	0.315793	0.391134	primiparity;code_bep_n;m_bmiincl;m_hbincl;m_heightincl;m_muacincl	FALSE
PC.aa.C34.1	1–2m	Pre+Postnatal	-1.19426	-2.52018	0.131659	-2.72007	0.0771238	0.133241	m_hbincl;GWG	FALSE
PC.aa.C34.2	1–2m	Pre+Postnatal	-1.27618	-2.64404	0.0916687	-2.91531	0.0672152	0.123321	m_hbincl;GWG	FALSE	TRUE	FALSE	0.607639
PC.aa.C34.3	1–2m	Pre+Postnatal	-0.0250606	-0.0707465	0.0206254	0.0664327	0.279976	0.358522	code_bep_n;m_hbincl;GWG;m_heightincl;m_muacincl	FALSE
PC.aa.C34.4	1–2m	Pre+Postnatal	-0.00977786	-0.0194425	-0.000113266	0.102855	0.0474099	0.0998128		TRUE
PC.aa.C36.1	1–2m	Pre+Postnatal	-1.40391	-2.62461	-0.183215	-3.21973	0.0244976	0.0738512	m_hbincl	TRUE
PC.aa.C36.2	1–2m	Pre+Postnatal	-3.53588	-6.93394	-0.137823	-4	0.0415198	0.0941006	m_hbincl;w_age;m_muacincl	TRUE
PC.aa.C36.3	1–2m	Pre+Postnatal	-0.600877	-1.36466	0.162906	-1.30588	0.122087	0.187983	primiparity;m_bmiincl;m_hbincl;GWG;w_age;m_muacincl	FALSE
PC.aa.C36.4	1–2m	Pre+Postnatal	-0.410262	-0.781394	-0.0391304	-0.851601	0.0305182	0.0836426	m_hbincl;GWG;w_age;m_muacincl	TRUE
PC.aa.C36.5	1–2m	Pre+Postnatal	-0.00564795	-0.0312323	0.0199364	0.112698	0.663089	0.723394	primiparity;code_bep_n;m_bmiincl;m_hbincl;ga_days_incl;GWG;w_age;m_heightincl;m_muacincl	FALSE
PC.aa.C36.6	1–2m	Pre+Postnatal	-0.00432608	-0.00976289	0.00111073	0.115848	0.117936	0.183849	m_bmiincl;m_hbincl;m_muacincl	FALSE
PC.aa.C38.0	1–2m	Pre+Postnatal	-0.0965811	-0.188442	-0.00472056	-0.104019	0.0394757	0.0912874	m_hbincl;GWG;w_age	TRUE
PC.aa.C38.3	1–2m	Pre+Postnatal	-0.205839	-0.411291	-0.000387106	-0.364408	0.0495757	0.101906	m_hbincl	TRUE
PC.aa.C38.4	1–2m	Pre+Postnatal	-0.246228	-0.490213	-0.00224288	-0.460665	0.0479589	0.0999707	m_hbincl;m_muacincl	TRUE
PC.aa.C38.5	1–2m	Pre+Postnatal	-0.0589165	-0.141164	0.0233306	-0.0142545	0.158908	0.230952	code_bep_n;m_hbincl;ga_days_incl;w_age;m_heightincl	FALSE
PC.aa.C38.6	1–2m	Pre+Postnatal	-0.0677599	-0.133242	-0.00227786	-0.0353306	0.0426462	0.0947226	code_bep_n;m_hbincl;w_age;m_heightincl	TRUE
PC.aa.C40.3	1–2m	Pre+Postnatal	-0.00714737	-0.0207745	0.00647979	0.109124	0.301492	0.381739	code_bep_n;m_bmiincl;m_hbincl;ga_days_incl;m_heightincl;m_muacincl	FALSE
PC.aa.C40.4	1–2m	Pre+Postnatal	-0.0200424	-0.0384887	-0.0015962	0.0783923	0.0334212	0.0852817		TRUE
PC.aa.C40.5	1–2m	Pre+Postnatal	-0.0247561	-0.0458463	-0.00366586	0.0671584	0.0217524	0.0701123	m_hbincl;GWG;w_age;m_muacincl	TRUE
PC.aa.C40.6	1–2m	Pre+Postnatal	-0.0830906	-0.159911	-0.00627011	-0.0718675	0.0342246	0.0863392	code_bep_n;m_bmiincl;m_hbincl;ga_days_incl;w_age;m_heightincl;m_muacincl	TRUE
PC.aa.C42.4	1–2m	Pre+Postnatal	-0.00634628	-0.0115154	-0.00117721	0.111034	0.0164792	0.0679055	w_age	TRUE
PC.ae.C30.1	1–2m	Pre+Postnatal	-0.0316948	-0.0889707	0.0255811	0.0506217	0.275712	0.35586	primiparity;code_bep_n;m_bmiincl;m_hbincl;ga_days_incl;GWG;w_age;m_heightincl;m_muacincl	FALSE
PC.ae.C30.2	1–2m	Pre+Postnatal	-0.00337049	-0.0064187	-0.000322275	0.118126	0.0304699	0.0836426	w_age	TRUE
PC.ae.C32.1	1–2m	Pre+Postnatal	-0.0209174	-0.0518314	0.00999658	0.076307	0.183115	0.254868	code_bep_n;m_bmiincl;m_hbincl;ga_days_incl;GWG;m_heightincl	FALSE
PC.ae.C34.0	1–2m	Pre+Postnatal	-0.0244254	-0.0554868	0.00663594	0.0679465	0.122274	0.187983	code_bep_n;m_hbincl;GWG;m_heightincl	FALSE
PC.ae.C34.1	1–2m	Pre+Postnatal	-0.0211146	-0.0953185	0.0530893	0.075837	0.57452	0.640922	primiparity;code_bep_n;m_bmiincl;m_hbincl;ga_days_incl;GWG;w_age;m_heightincl;m_muacincl	FALSE
PC.ae.C34.2	1–2m	Pre+Postnatal	-0.0415524	-0.111439	0.0283344	0.0271287	0.241779	0.318545	primiparity;m_hbincl;GWG	FALSE
PC.ae.C34.3	1–2m	Pre+Postnatal	-0.103681	-0.200566	-0.006796	-0.12094	0.0361365	0.0891367	m_hbincl	TRUE
PC.ae.C36.1	1–2m	Pre+Postnatal	-0.0332414	-0.0813309	0.0148481	0.0469359	0.173902	0.245562	code_bep_n;m_hbincl;ga_days_incl;GWG;w_age;m_heightincl	FALSE
PC.ae.C36.2	1–2m	Pre+Postnatal	-0.0439452	-0.111429	0.0235381	0.0214259	0.200059	0.273311	m_hbincl;GWG	FALSE
PC.ae.C36.3	1–2m	Pre+Postnatal	-0.0663871	-0.132079	-0.000694786	-0.0320588	0.0476584	0.0998128	primiparity;m_hbincl;GWG;m_muacincl	TRUE
PC.ae.C36.4	1–2m	Pre+Postnatal	-0.077781	-0.158992	0.00342962	-0.0592133	0.0603446	0.113311	primiparity;m_hbincl;GWG;w_age	FALSE
PC.ae.C36.5	1–2m	Pre+Postnatal	-0.083275	-0.161268	-0.00528175	-0.0723069	0.0365537	0.0891749	m_hbincl	TRUE
PC.ae.C38.2	1–2m	Pre+Postnatal	-0.0205095	-0.0358779	-0.00514101	0.0772792	0.0092806	0.0632094	primiparity;m_hbincl;GWG;w_age;m_muacincl	TRUE
PC.ae.C38.3	1–2m	Pre+Postnatal	-0.0136913	-0.029448	0.00206541	0.0935287	0.0880144	0.146911	primiparity;m_bmiincl;GWG;w_age;m_muacincl	FALSE
PC.ae.C38.4	1–2m	Pre+Postnatal	-0.103574	-0.192453	-0.0146948	-0.120684	0.0226986	0.0717457	m_hbincl;w_age	TRUE
PC.ae.C38.5	1–2m	Pre+Postnatal	-0.125631	-0.232372	-0.0188895	-0.173252	0.0214014	0.0701123	m_hbincl	TRUE
PC.ae.C38.6	1–2m	Pre+Postnatal	-0.020073	-0.0433326	0.00318658	0.0783194	0.0901849	0.149513	code_bep_n;m_hbincl;GWG;m_heightincl	FALSE
PC.ae.C40.2	1–2m	Pre+Postnatal	-0.00761868	-0.0241296	0.0088922	0.108001	0.363171	0.440568	code_bep_n;m_hbincl;GWG;m_heightincl	FALSE
PC.ae.C40.3	1–2m	Pre+Postnatal	-0.00169249	-0.0112142	0.00782924	0.122125	0.725721	0.774567	primiparity;code_bep_n;m_bmiincl;m_hbincl;ga_days_incl;GWG;w_age;m_heightincl;m_muacincl	FALSE
PC.ae.C40.4	1–2m	Pre+Postnatal	-0.0214402	-0.0443192	0.00143872	0.075061	0.0660219	0.12214	primiparity;m_bmiincl;GWG;w_age;m_muacincl	FALSE
PC.ae.C40.5	1–2m	Pre+Postnatal	-0.0635252	-0.132547	0.00549694	-0.0252381	0.0709477	0.125952	primiparity;m_bmiincl;m_hbincl;GWG;w_age;m_muacincl	FALSE
PC.ae.C40.6	1–2m	Pre+Postnatal	-0.12116	-0.218506	-0.0238142	-0.162597	0.0150911	0.0679055	primiparity;m_bmiincl;GWG;w_age;m_muacincl	TRUE
PC.ae.C42.3	1–2m	Pre+Postnatal	0.000104649	-0.00831255	0.00852185	0.126408	0.98042	0.987089	code_bep_n;m_bmiincl;m_hbincl;ga_days_incl;GWG;w_age;m_heightincl;m_muacincl	FALSE
SM..OH..C14.1	1–2m	Pre+Postnatal	-0.00808503	-0.0177086	0.00153852	0.10689	0.0989502	0.160343	code_bep_n;m_hbincl;ga_days_incl;m_heightincl	FALSE
SM..OH..C16.1	1–2m	Pre+Postnatal	-0.0159755	-0.0314493	-0.000501717	0.0880849	0.0431159	0.0947226	primiparity;code_bep_n;m_hbincl;ga_days_incl;w_age;m_heightincl	TRUE
SM..OH..C22.1	1–2m	Pre+Postnatal	-0.191779	-0.366812	-0.0167458	-0.330899	0.0319871	0.0848834	m_hbincl	TRUE
SM..OH..C22.2	1–2m	Pre+Postnatal	-0.0162516	-0.0391742	0.00667089	0.0874267	0.163167	0.234453	primiparity;code_bep_n;m_bmiincl;m_hbincl;ga_days_incl;w_age;m_heightincl;m_muacincl	FALSE
SM..OH..C24.1	1–2m	Pre+Postnatal	-0.0363117	-0.0684988	-0.00412457	0.0396185	0.0273122	0.0782363	code_bep_n;m_hbincl;m_heightincl	TRUE
SM.C16.0	1–2m	Pre+Postnatal	-0.448298	-0.956193	0.0595975	-0.942249	0.0831615	0.142014	code_bep_n;m_bmiincl;m_hbincl;ga_days_incl;m_heightincl	FALSE	TRUE	FALSE	0.86715
SM.C16.1	1–2m	Pre+Postnatal	-0.0184001	-0.0397384	0.00293818	0.0823063	0.090429	0.149513	primiparity;code_bep_n;m_bmiincl;m_hbincl;ga_days_incl;m_heightincl;m_muacincl	FALSE
SM.C18.0	1–2m	Pre+Postnatal	-0.515126	-0.941894	-0.0883594	-1.10152	0.0183544	0.0694435	code_bep_n;m_bmiincl;m_hbincl;m_heightincl	TRUE
SM.C18.1	1–2m	Pre+Postnatal	-0.0280384	-0.0522648	-0.00381199	0.0593359	0.0236341	0.0728719	code_bep_n;m_bmiincl;m_hbincl;ga_days_incl;m_heightincl;m_muacincl	TRUE
SM.C20.2	1–2m	Pre+Postnatal	-0.00197406	-0.00517926	0.00123114	0.121454	0.225331	0.301893	primiparity;code_bep_n;m_bmiincl;m_hbincl;GWG;w_age;m_heightincl;m_muacincl	FALSE
SM.C22.3	1–2m	Pre+Postnatal	-0.00669166	-0.0160002	0.00261688	0.110211	0.157467	0.229985	m_hbincl;GWG	FALSE
SM.C24.0	1–2m	Pre+Postnatal	-2.42168	-4.06605	-0.777316	-4	0.00418945	0.0526879	m_hbincl;GWG;w_age;m_muacincl	TRUE	TRUE	FALSE	0.646199
SM.C24.1	1–2m	Pre+Postnatal	-0.214975	-1.08747	0.657522	-0.386182	0.626864	0.692357	primiparity;code_bep_n;m_bmiincl;m_hbincl;ga_days_incl;w_age;m_heightincl	FALSE
SM.C26.0	1–2m	Pre+Postnatal	-0.0520841	-0.0824912	-0.021677	0.00202879	0.000922174	0.0454939	primiparity;m_bmiincl;GWG;w_age;m_muacincl	TRUE
SM.C26.1	1–2m	Pre+Postnatal	-0.0222399	-0.0517617	0.00728181	0.0731551	0.138607	0.207211	code_bep_n;m_bmiincl;m_hbincl;w_age;m_heightincl;m_muacincl	FALSE
TG.14.0_32.2.	1–2m	Pre+Postnatal	-46.2188	-95.2929	2.8553	-4	0.0646949	0.120186	m_bmiincl;m_hbincl;m_muacincl	FALSE	TRUE	FALSE	0.86715
TG.14.0_34.0.	1–2m	Pre+Postnatal	-9.76242	-17.3588	-2.16608	-4	0.0121499	0.0649948	GWG;w_age	TRUE	TRUE	FALSE	0.607639
TG.14.0_34.1.	1–2m	Pre+Postnatal	-53.9681	-105.964	-1.972	-4	0.0420289	0.0942466	m_hbincl	TRUE
TG.14.0_34.2.	1–2m	Pre+Postnatal	-61.12	-108.028	-14.2117	-4	0.0110301	0.0636716	m_bmiincl;m_hbincl	TRUE
TG.14.0_34.3.	1–2m	Pre+Postnatal	-7.16333	-13.9168	-0.409821	-4	0.0377895	0.0904194	code_bep_n;m_bmiincl;m_hbincl	TRUE
TG.14.0_35.1.	1–2m	Pre+Postnatal	-1.21485	-2.27205	-0.157644	-2.76913	0.0246171	0.0738512	code_bep_n;m_hbincl	TRUE
TG.14.0_35.2.	1–2m	Pre+Postnatal	-1.39253	-2.45025	-0.334816	-3.1926	0.0102373	0.0632094	m_hbincl	TRUE
TG.14.0_36.1.	1–2m	Pre+Postnatal	-15.8501	-30.1656	-1.53456	-4	0.0302607	0.0836426	primiparity;m_bmiincl;GWG;w_age;m_muacincl	TRUE
TG.14.0_36.2.	1–2m	Pre+Postnatal	-47.3031	-89.5185	-5.08777	-4	0.0283611	0.0796983	primiparity;m_bmiincl;m_hbincl;GWG;w_age;m_muacincl	TRUE
TG.14.0_36.3.	1–2m	Pre+Postnatal	-63.0604	-111.704	-14.4167	-4	0.0114385	0.0636716	m_hbincl;GWG;w_age;m_muacincl	TRUE
TG.14.0_36.4.	1–2m	Pre+Postnatal	-22.4156	-47.4335	2.6022	-4	0.0786678	0.135382	m_hbincl;GWG	FALSE	TRUE	FALSE	0.86715
TG.14.0_38.4.	1–2m	Pre+Postnatal	-4.57341	-7.94606	-1.20076	-4	0.00822341	0.0618847	m_hbincl;w_age	TRUE
TG.14.0_38.5.	1–2m	Pre+Postnatal	-2.68894	-5.22685	-0.151027	-4	0.0379978	0.0904194	code_bep_n;m_hbincl	TRUE	TRUE	FALSE	0.607639
TG.16.0_28.1.	1–2m	Pre+Postnatal	-41.4499	-76.7479	-6.15197	-4	0.0216914	0.0701123		TRUE
TG.16.0_28.2.	1–2m	Pre+Postnatal	-29.9758	-53.9982	-5.95328	-4	0.0148261	0.0679055		TRUE
TG.16.0_30.2.	1–2m	Pre+Postnatal	-69.1787	-124.228	-14.1291	-4	0.01415	0.0679055	m_hbincl	TRUE
TG.16.0_32.0.	1–2m	Pre+Postnatal	-22.736	-40.7768	-4.69531	-4	0.0138815	0.0679055	GWG	TRUE
TG.16.0_32.1.	1–2m	Pre+Postnatal	-55.8866	-103.03	-8.74352	-4	0.0204963	0.0701123	m_hbincl	TRUE
TG.16.0_32.2.	1–2m	Pre+Postnatal	-53.493	-93.0391	-13.947	-4	0.00837693	0.0619893	m_hbincl	TRUE
TG.16.0_32.3.	1–2m	Pre+Postnatal	-2.44228	-6.43459	1.55003	-4	0.228482	0.304643	primiparity;code_bep_n;m_bmiincl;m_hbincl;m_heightincl;m_muacincl	FALSE
TG.16.0_33.1.	1–2m	Pre+Postnatal	-2.10323	-3.97032	-0.236132	-4	0.0275418	0.0783882	primiparity;code_bep_n;m_hbincl;ga_days_incl;m_heightincl	TRUE
TG.16.0_33.2.	1–2m	Pre+Postnatal	-1.42948	-2.50537	-0.353587	-3.28065	0.00958724	0.0632094	primiparity;code_bep_n;m_hbincl;ga_days_incl;w_age;m_heightincl	TRUE
TG.16.0_34.0.	1–2m	Pre+Postnatal	-27.14	-47.1196	-7.16033	-4	0.00811806	0.0618847	m_bmiincl;GWG;m_muacincl	TRUE
TG.16.0_34.1.	1–2m	Pre+Postnatal	-128.566	-229.765	-27.368	-4	0.0131446	0.0670829		TRUE
TG.16.0_34.2.	1–2m	Pre+Postnatal	-104.558	-180.358	-28.7575	-4	0.00720953	0.0618847	primiparity;code_bep_n;m_hbincl;m_heightincl	TRUE	TRUE	FALSE	0.86715
TG.16.0_34.3.	1–2m	Pre+Postnatal	-16.9073	-29.8061	-4.00838	-4	0.0105786	0.0632094	primiparity;code_bep_n;m_hbincl;ga_days_incl;w_age;m_heightincl	TRUE
TG.16.0_34.4.	1–2m	Pre+Postnatal	-1.4176	-2.81363	-0.0215591	-3.25233	0.0466132	0.0995014	primiparity;code_bep_n;m_bmiincl;m_hbincl;ga_days_incl;m_heightincl;m_muacincl	TRUE
TG.16.0_35.1.	1–2m	Pre+Postnatal	-2.85559	-5.25527	-0.455923	-4	0.0200384	0.0700557	primiparity;code_bep_n;m_hbincl;ga_days_incl;w_age;m_heightincl	TRUE
TG.16.0_35.2.	1–2m	Pre+Postnatal	-3.15911	-5.55592	-0.762297	-4	0.0101639	0.0632094	primiparity;code_bep_n;m_hbincl;ga_days_incl;w_age;m_heightincl	TRUE
TG.16.0_35.3.	1–2m	Pre+Postnatal	-1.30842	-2.38352	-0.233329	-2.99215	0.0174352	0.0679055	primiparity;code_bep_n;m_hbincl;ga_days_incl;w_age;m_heightincl	TRUE
TG.16.0_36.2.	1–2m	Pre+Postnatal	-169.114	-318.331	-19.8972	-4	0.0266215	0.077515	m_bmiincl;m_muacincl	TRUE
TG.16.0_36.3.	1–2m	Pre+Postnatal	-160.161	-293.546	-26.7758	-4	0.018955	0.0696376	m_hbincl	TRUE
TG.16.0_36.4.	1–2m	Pre+Postnatal	-58.5603	-121.96	4.83952	-4	0.06996	0.125251	primiparity;m_hbincl	FALSE
TG.16.0_36.5.	1–2m	Pre+Postnatal	1.2367	-4.61675	7.09016	3.07354	0.676727	0.736342	primiparity;code_bep_n;m_bmiincl;m_hbincl;ga_days_incl;GWG;w_age;m_heightincl	FALSE
TG.16.0_36.6.	1–2m	Pre+Postnatal	-0.214086	-1.18393	0.755758	-0.384063	0.663111	0.723394	primiparity;code_bep_n;m_bmiincl;m_hbincl;ga_days_incl;GWG;w_age;m_heightincl;m_muacincl	FALSE
TG.16.0_37.3.	1–2m	Pre+Postnatal	-0.727403	-1.7658	0.310995	-1.60743	0.16822	0.240934	primiparity;code_bep_n;m_bmiincl;m_hbincl;ga_days_incl;w_age;m_heightincl;m_muacincl	FALSE
TG.16.0_38.1.	1–2m	Pre+Postnatal	-2.4667	-4.90601	-0.0273999	-4	0.0475162	0.0998128	primiparity;m_bmiincl;w_age;m_muacincl	TRUE
TG.16.0_38.2.	1–2m	Pre+Postnatal	-3.85358	-7.57875	-0.128409	-4	0.0427077	0.0947226	m_bmiincl;m_muacincl	TRUE
TG.16.0_38.3.	1–2m	Pre+Postnatal	-7.25895	-12.9438	-1.57411	-4	0.0126995	0.0662804	m_hbincl	TRUE
TG.16.0_38.4.	1–2m	Pre+Postnatal	-8.16547	-13.9916	-2.33934	-4	0.00634772	0.0618847	m_hbincl	TRUE
TG.16.0_38.5.	1–2m	Pre+Postnatal	-5.39501	-9.47306	-1.31695	-4	0.00988874	0.0632094	primiparity;code_bep_n;m_hbincl;m_heightincl	TRUE
TG.16.0_38.6.	1–2m	Pre+Postnatal	-2.9411	-5.35248	-0.529714	-4	0.0172032	0.0679055	primiparity;code_bep_n;m_bmiincl;m_hbincl;ga_days_incl;GWG;m_heightincl;m_muacincl	TRUE
TG.16.0_38.7.	1–2m	Pre+Postnatal	-0.455521	-1.07788	0.166842	-0.959464	0.150061	0.221352	primiparity;code_bep_n;m_bmiincl;m_hbincl;ga_days_incl;GWG;w_age;m_heightincl;m_muacincl	FALSE
TG.16.0_40.6.	1–2m	Pre+Postnatal	-2.67021	-4.68528	-0.655145	-4	0.00978109	0.0632094	primiparity;code_bep_n;m_bmiincl;m_hbincl;ga_days_incl;GWG;m_heightincl;m_muacincl	TRUE
TG.16.0_40.7.	1–2m	Pre+Postnatal	-3.00044	-5.85102	-0.149857	-4	0.039262	0.0912874	primiparity;code_bep_n;m_bmiincl;m_hbincl;ga_days_incl;GWG;m_heightincl;m_muacincl	TRUE
TG.16.0_40.8.	1–2m	Pre+Postnatal	-1.76246	-3.36582	-0.159096	-4	0.0314558	0.0848223	primiparity;code_bep_n;m_bmiincl;m_hbincl;ga_days_incl;GWG;w_age;m_heightincl;m_muacincl	TRUE
TG.16.1_28.0.	1–2m	Pre+Postnatal	-12.7514	-21.8229	-3.67989	-4	0.00620828	0.0618847	primiparity;code_bep_n;m_bmiincl;m_hbincl;GWG;m_heightincl	TRUE	TRUE	FALSE	0.86715
TG.16.1_30.1.	1–2m	Pre+Postnatal	-11.8873	-21.0618	-2.71289	-4	0.0114724	0.0636716	code_bep_n;m_hbincl	TRUE
TG.16.1_32.0.	1–2m	Pre+Postnatal	-9.62754	-15.0041	-4.25097	-4	0.000546188	0.0454939	primiparity;code_bep_n;m_bmiincl;m_hbincl;ga_days_incl;GWG;m_heightincl	TRUE
TG.16.1_32.1.	1–2m	Pre+Postnatal	-12.7022	-21.3386	-4.06587	-4	0.00423571	0.0526879	code_bep_n;m_hbincl;ga_days_incl;m_heightincl	TRUE
TG.16.1_32.2.	1–2m	Pre+Postnatal	-8.28073	-13.0963	-3.46511	-4	0.000878304	0.0454939	m_hbincl	TRUE	FALSE	TRUE	0.86715
TG.16.1_33.1.	1–2m	Pre+Postnatal	-0.452034	-0.829937	-0.0741311	-0.951153	0.0194185	0.0696376	primiparity;code_bep_n;m_hbincl;ga_days_incl;GWG;w_age;m_heightincl	TRUE
TG.16.1_34.0.	1–2m	Pre+Postnatal	-6.46393	-10.7079	-2.21992	-4	0.00309385	0.0526879	primiparity;code_bep_n;m_hbincl;ga_days_incl;w_age;m_heightincl	TRUE
TG.16.1_34.1.	1–2m	Pre+Postnatal	-33.6436	-57.8236	-9.46352	-4	0.0067356	0.0618847	primiparity;code_bep_n;m_hbincl;ga_days_incl;m_heightincl	TRUE
TG.16.1_34.2.	1–2m	Pre+Postnatal	-27.3234	-44.1795	-10.4674	-4	0.00167848	0.0496829	primiparity;code_bep_n;m_hbincl;ga_days_incl;w_age;m_heightincl	TRUE
TG.16.1_34.3.	1–2m	Pre+Postnatal	-3.21617	-5.63013	-0.802211	-4	0.00939692	0.0632094	primiparity;code_bep_n;m_hbincl;ga_days_incl;GWG;w_age;m_heightincl	TRUE
TG.16.1_36.1.	1–2m	Pre+Postnatal	-6.94006	-12.1665	-1.71361	-4	0.00962019	0.0632094	m_bmiincl;m_muacincl	TRUE
TG.16.1_36.2.	1–2m	Pre+Postnatal	-18.4896	-32.7189	-4.26017	-4	0.0112497	0.0636716	code_bep_n;m_bmiincl;m_hbincl;m_muacincl	TRUE
TG.16.1_36.3.	1–2m	Pre+Postnatal	-22.8752	-38.1056	-7.64474	-4	0.00351158	0.0526879	m_hbincl;m_muacincl	TRUE
TG.16.1_36.4.	1–2m	Pre+Postnatal	-7.55685	-13.4842	-1.62951	-4	0.0128381	0.0662804	primiparity;m_hbincl	TRUE
TG.16.1_36.5.	1–2m	Pre+Postnatal	-0.222307	-0.752704	0.308091	-0.403654	0.408616	0.483802	primiparity;code_bep_n;m_hbincl;ga_days_incl;GWG;w_age;m_heightincl;m_muacincl	FALSE	TRUE	FALSE	0.86715
TG.16.1_38.3.	1–2m	Pre+Postnatal	-1.19206	-1.91395	-0.470177	-2.71483	0.00137733	0.047041	m_bmiincl;m_muacincl	TRUE
TG.16.1_38.4.	1–2m	Pre+Postnatal	-1.05658	-1.76309	-0.350078	-2.39195	0.00365066	0.0526879	primiparity;code_bep_n;m_hbincl	TRUE
TG.16.1_38.5.	1–2m	Pre+Postnatal	-0.706719	-1.17901	-0.234432	-1.55813	0.00363966	0.0526879	primiparity;code_bep_n;m_hbincl;ga_days_incl;GWG;w_age;m_heightincl	TRUE
TG.17.0_32.1.	1–2m	Pre+Postnatal	-1.14314	-2.21316	-0.0731154	-2.59823	0.0364522	0.0891749	primiparity;code_bep_n;m_hbincl;ga_days_incl;m_heightincl	TRUE
TG.17.0_34.1.	1–2m	Pre+Postnatal	-2.71551	-5.02419	-0.406829	-4	0.0214924	0.0701123	primiparity;code_bep_n;m_hbincl;ga_days_incl;w_age;m_heightincl	TRUE
TG.17.0_34.2.	1–2m	Pre+Postnatal	-2.94797	-4.91614	-0.979814	-4	0.00360582	0.0526879	primiparity;code_bep_n;m_hbincl;ga_days_incl;w_age;m_heightincl	TRUE	TRUE	TRUE	0.86715
TG.17.0_34.3.	1–2m	Pre+Postnatal	-0.325534	-0.613338	-0.0377292	-0.649671	0.0269248	0.0776274	primiparity;code_bep_n;m_hbincl;ga_days_incl;w_age;m_heightincl	TRUE
TG.17.0_36.3.	1–2m	Pre+Postnatal	-2.82169	-4.85757	-0.785815	-4	0.0069364	0.0618847		TRUE
TG.17.0_36.4.	1–2m	Pre+Postnatal	-0.879147	-1.68162	-0.0766733	-1.96907	0.0320082	0.0848834	primiparity;m_hbincl	TRUE
TG.17.1_32.1.	1–2m	Pre+Postnatal	-0.88202	-1.63162	-0.132425	-1.97592	0.0214391	0.0701123	primiparity;code_bep_n;m_hbincl;m_heightincl	TRUE
TG.17.1_34.1.	1–2m	Pre+Postnatal	-2.28339	-4.14911	-0.417673	-4	0.0168237	0.0679055	primiparity;code_bep_n;m_hbincl;ga_days_incl;m_heightincl	TRUE
TG.17.1_34.2.	1–2m	Pre+Postnatal	-1.94183	-3.31903	-0.564626	-4	0.00605538	0.0618847	primiparity;code_bep_n;m_hbincl;ga_days_incl;w_age;m_heightincl	TRUE
TG.17.1_34.3.	1–2m	Pre+Postnatal	-0.216144	-0.415019	-0.0172697	-0.388969	0.0333802	0.0852817	primiparity;code_bep_n;m_hbincl;ga_days_incl;w_age;m_heightincl	TRUE	TRUE	FALSE	0.607639
TG.17.1_36.3.	1–2m	Pre+Postnatal	-1.68011	-3.05763	-0.302588	-3.87797	0.0171908	0.0679055	primiparity;m_hbincl	TRUE
TG.17.1_36.4.	1–2m	Pre+Postnatal	-0.554345	-1.11403	0.00534247	-1.19499	0.0521966	0.103925	primiparity;m_hbincl;w_age	FALSE
TG.17.1_36.5.	1–2m	Pre+Postnatal	-0.00868681	-0.0770974	0.0597238	0.105456	0.802107	0.837966	primiparity;code_bep_n;m_hbincl;ga_days_incl;GWG;w_age;m_heightincl	FALSE
TG.17.1_38.5.	1–2m	Pre+Postnatal	-0.00870653	-0.0148665	-0.00254651	0.105409	0.00593961	0.0618847	primiparity;code_bep_n;m_hbincl;ga_days_incl;GWG;w_age;m_heightincl	TRUE
TG.17.2_34.2.	1–2m	Pre+Postnatal	-0.268922	-0.606993	0.0691487	-0.514751	0.118011	0.183849	primiparity;code_bep_n;m_bmiincl;m_hbincl;ga_days_incl;GWG;w_age;m_heightincl;m_muacincl	FALSE
TG.17.2_34.3.	1–2m	Pre+Postnatal	-0.0772955	-0.150647	-0.00394355	-0.0580562	0.0390448	0.0912874	primiparity;code_bep_n;m_bmiincl;m_hbincl;ga_days_incl;GWG;w_age;m_heightincl;m_muacincl	TRUE
TG.17.2_36.2.	1–2m	Pre+Postnatal	-0.141386	-0.347229	0.0644566	-0.210801	0.176612	0.24659	primiparity;code_bep_n;m_hbincl;ga_days_incl;GWG;w_age;m_heightincl	FALSE
TG.17.2_36.3.	1–2m	Pre+Postnatal	-0.0661827	-0.195581	0.0632155	-0.0315717	0.313595	0.390018	primiparity;code_bep_n;m_hbincl;ga_days_incl;w_age;m_heightincl;m_muacincl	FALSE
TG.17.2_36.4.	1–2m	Pre+Postnatal	-0.0945395	-0.277444	0.0883655	-0.0991531	0.308503	0.384762	primiparity;code_bep_n;m_hbincl;ga_days_incl;GWG;w_age;m_heightincl;m_muacincl	FALSE
TG.17.2_38.5.	1–2m	Pre+Postnatal	-0.0334663	-0.0643157	-0.00261698	0.0463997	0.033699	0.0854993	primiparity;m_hbincl;m_muacincl	TRUE
TG.17.2_38.6.	1–2m	Pre+Postnatal	-0.0202805	-0.0525758	0.0120148	0.0778249	0.216415	0.293129	primiparity;code_bep_n;m_bmiincl;m_hbincl;ga_days_incl;GWG;w_age;m_heightincl	FALSE
TG.18.0_30.0.	1–2m	Pre+Postnatal	-11.0412	-20.0375	-2.04499	-4	0.0165265	0.0679055	primiparity;m_bmiincl;GWG;w_age;m_muacincl	TRUE
TG.18.0_30.1.	1–2m	Pre+Postnatal	-26.7787	-50.2966	-3.26073	-4	0.0259392	0.0762715	primiparity;m_bmiincl;GWG;w_age;m_muacincl	TRUE
TG.18.0_32.0.	1–2m	Pre+Postnatal	-9.20292	-15.9731	-2.43271	-4	0.00807516	0.0618847	m_bmiincl;GWG;m_muacincl	TRUE
TG.18.0_32.1.	1–2m	Pre+Postnatal	-22.5122	-42.5214	-2.50295	-4	0.0277291	0.0784187	primiparity;m_bmiincl;w_age;m_muacincl	TRUE
TG.18.0_32.2.	1–2m	Pre+Postnatal	-25.4869	-42.5198	-8.4539	-4	0.00363265	0.0526879	w_age;m_muacincl	TRUE	TRUE	FALSE	0.607639
TG.18.0_34.2.	1–2m	Pre+Postnatal	-72.4515	-119.233	-25.6697	-4	0.00263615	0.0526879	m_muacincl	TRUE
TG.18.0_34.3.	1–2m	Pre+Postnatal	-5.71859	-11.2229	-0.214304	-4	0.0418359	0.0942466	primiparity;code_bep_n;m_hbincl;ga_days_incl;m_heightincl;m_muacincl	TRUE
TG.18.0_36.1.	1–2m	Pre+Postnatal	-26.7736	-71.3422	17.7949	-4	0.236928	0.313083	primiparity;m_bmiincl;m_hbincl;w_age;m_muacincl	FALSE
TG.18.0_36.2.	1–2m	Pre+Postnatal	-57.9206	-132.13	16.2892	-4	0.125045	0.190791	primiparity;m_bmiincl;m_hbincl;w_age;m_muacincl	FALSE
TG.18.0_36.3.	1–2m	Pre+Postnatal	-44.7483	-86.2129	-3.28378	-4	0.0346196	0.0864196	primiparity;m_bmiincl;w_age;m_muacincl	TRUE
TG.18.0_36.4.	1–2m	Pre+Postnatal	-20.6688	-37.4061	-3.93154	-4	0.0158758	0.0679055	m_bmiincl;m_muacincl	TRUE
TG.18.0_36.5.	1–2m	Pre+Postnatal	-0.0344894	-1.99473	1.92575	0.0439614	0.972293	0.985612	primiparity;code_bep_n;m_bmiincl;ga_days_incl;GWG;w_age;m_heightincl;m_muacincl	FALSE
TG.18.0_38.6.	1–2m	Pre+Postnatal	-1.44712	-2.4224	-0.471835	-3.32269	0.00392753	0.0526879	primiparity;code_bep_n;m_bmiincl;m_hbincl;ga_days_incl;GWG;w_age;m_heightincl	TRUE
TG.18.0_38.7.	1–2m	Pre+Postnatal	-0.0810536	-0.187026	0.0249184	-0.0670128	0.132696	0.200398	primiparity;code_bep_n;m_bmiincl;m_hbincl;ga_days_incl;GWG;w_age;m_heightincl;m_muacincl	FALSE
TG.18.1_26.0.	1–2m	Pre+Postnatal	-112.534	-222.543	-2.52426	-4	0.0450376	0.0966024	m_hbincl;w_age	TRUE
TG.18.1_28.1.	1–2m	Pre+Postnatal	-43.3625	-84.5846	-2.14044	-4	0.0393777	0.0912874	m_bmiincl;GWG;w_age;m_muacincl	TRUE
TG.18.1_30.0.	1–2m	Pre+Postnatal	-90.7559	-165.481	-16.0311	-4	0.0176544	0.0681613	m_hbincl;w_age	TRUE
TG.18.1_30.1.	1–2m	Pre+Postnatal	-89.6223	-192.112	12.8678	-4	0.086029	0.144685	primiparity;m_bmiincl;m_hbincl;GWG;w_age;m_muacincl	FALSE
TG.18.1_30.2.	1–2m	Pre+Postnatal	-96.2079	-176.986	-15.4298	-4	0.0199316	0.0700557	m_hbincl;GWG;w_age;m_muacincl	TRUE
TG.18.1_31.0.	1–2m	Pre+Postnatal	-2.34103	-4.84766	0.165611	-4	0.0669395	0.123321	primiparity;code_bep_n;m_hbincl;m_heightincl	FALSE
TG.18.1_32.0.	1–2m	Pre+Postnatal	-89.726	-164.544	-14.9079	-4	0.0190978	0.0696376		TRUE
TG.18.1_32.1.	1–2m	Pre+Postnatal	-107.859	-224.604	8.88539	-4	0.0698889	0.125251	m_bmiincl;m_hbincl;w_age;m_muacincl	FALSE
TG.18.1_32.2.	1–2m	Pre+Postnatal	-88.4094	-163.01	-13.8088	-4	0.0205393	0.0701123	m_hbincl;w_age;m_muacincl	TRUE
TG.18.1_32.3.	1–2m	Pre+Postnatal	-0.416669	-8.66266	7.82932	-0.866868	0.920546	0.946117	code_bep_n;m_bmiincl;m_hbincl;ga_days_incl;GWG;w_age;m_heightincl;m_muacincl	FALSE
TG.18.1_33.0.	1–2m	Pre+Postnatal	-4.00424	-7.68938	-0.319112	-4	0.0334174	0.0852817	primiparity;code_bep_n;m_hbincl;ga_days_incl;m_heightincl	TRUE
TG.18.1_33.1.	1–2m	Pre+Postnatal	-5.8404	-11.3361	-0.34471	-4	0.0374302	0.0904194	primiparity;m_bmiincl;m_hbincl;m_muacincl	TRUE
TG.18.1_33.2.	1–2m	Pre+Postnatal	-2.46267	-4.85175	-0.0735872	-4	0.0434381	0.0947226	primiparity;m_heightincl	TRUE
TG.18.1_33.3.	1–2m	Pre+Postnatal	-0.154436	-0.507661	0.19879	-0.241901	0.388749	0.463991	primiparity;code_bep_n;m_bmiincl;m_hbincl;ga_days_incl;w_age;m_heightincl;m_muacincl	FALSE
TG.18.1_34.1.	1–2m	Pre+Postnatal	-303.71	-619.956	12.5367	-4	0.0596625	0.112724	m_bmiincl;GWG;w_age;m_muacincl	FALSE
TG.18.1_34.2.	1–2m	Pre+Postnatal	-253.528	-460.423	-46.6326	-4	0.0166852	0.0679055	m_hbincl;m_muacincl	TRUE
TG.18.1_34.3.	1–2m	Pre+Postnatal	-23.0572	-57.3532	11.2388	-4	0.185917	0.25796	primiparity;code_bep_n;m_bmiincl;m_hbincl;m_heightincl;m_muacincl	FALSE
TG.18.1_34.4.	1–2m	Pre+Postnatal	-1.64778	-4.63071	1.33514	-3.80093	0.276599	0.35597	primiparity;code_bep_n;m_bmiincl;m_hbincl;m_heightincl;m_muacincl	FALSE
TG.18.1_35.2.	1–2m	Pre+Postnatal	-5.6517	-10.468	-0.835437	-4	0.0217917	0.0701123	primiparity;m_bmiincl;m_hbincl;m_muacincl	TRUE
TG.18.1_35.3.	1–2m	Pre+Postnatal	-1.43927	-2.92225	0.0437034	-3.30399	0.057044	0.110601	primiparity;code_bep_n;m_bmiincl;m_hbincl;m_heightincl;m_muacincl	FALSE
TG.18.1_36.0.	1–2m	Pre+Postnatal	-13.5246	-31.9415	4.89234	-4	0.148759	0.220163	primiparity;m_bmiincl;w_age;m_muacincl	FALSE
TG.18.1_36.1.	1–2m	Pre+Postnatal	-82.1473	-185.982	21.6878	-4	0.120028	0.186338	primiparity;m_bmiincl;m_hbincl;w_age;m_muacincl	FALSE
TG.18.1_36.2.	1–2m	Pre+Postnatal	-48.6064	-142.368	45.1548	-4	0.307079	0.384066	primiparity;m_bmiincl;m_hbincl;ga_days_incl;GWG;w_age;m_muacincl	FALSE
TG.18.1_36.3.	1–2m	Pre+Postnatal	-145.273	-310.939	20.3926	-4	0.0851641	0.143775	primiparity;m_bmiincl;GWG;w_age;m_muacincl	FALSE	TRUE	FALSE	0.607639
TG.18.1_36.4.	1–2m	Pre+Postnatal	-62.5919	-150.025	24.8413	-4	0.15917	0.230952	m_bmiincl;m_hbincl;GWG;m_muacincl	FALSE
TG.18.1_36.5.	1–2m	Pre+Postnatal	6.13915	-5.17055	17.4488	4	0.285017	0.363642	m_bmiincl;GWG;m_muacincl	FALSE	TRUE	TRUE	0.86715
TG.18.1_36.6.	1–2m	Pre+Postnatal	0.497671	-1.03522	2.03056	1.31224	0.521929	0.597259	primiparity;code_bep_n;m_bmiincl;m_hbincl;ga_days_incl;GWG;m_heightincl	FALSE	TRUE	TRUE	0.86715
TG.18.1_38.5.	1–2m	Pre+Postnatal	-5.86103	-11.5754	-0.146672	-4	0.0444784	0.0958662	code_bep_n;m_bmiincl;m_hbincl;m_muacincl	TRUE
TG.18.1_38.6.	1–2m	Pre+Postnatal	-3.11689	-6.27681	0.0430213	-4	0.0531572	0.105177	primiparity;code_bep_n;m_hbincl;GWG;m_heightincl	FALSE
TG.18.1_38.7.	1–2m	Pre+Postnatal	-0.260811	-0.842065	0.320444	-0.495419	0.376424	0.454523	primiparity;code_bep_n;m_bmiincl;m_hbincl;ga_days_incl;GWG;w_age;m_heightincl;m_muacincl	FALSE
TG.18.2_28.0.	1–2m	Pre+Postnatal	-121.57	-223.012	-20.1276	-4	0.019183	0.0696376	m_hbincl	TRUE
TG.18.2_30.0.	1–2m	Pre+Postnatal	-96.7249	-166.019	-27.4305	-4	0.00655786	0.0618847	m_hbincl	TRUE
TG.18.2_30.1.	1–2m	Pre+Postnatal	-113.808	-200.753	-26.8629	-4	0.0106773	0.0632094	GWG;w_age;m_muacincl	TRUE
TG.18.2_31.0.	1–2m	Pre+Postnatal	-1.84281	-3.1612	-0.524427	-4	0.00648825	0.0618847	primiparity;m_hbincl	TRUE	FALSE	TRUE	0.86715
TG.18.2_32.0.	1–2m	Pre+Postnatal	-93.6982	-156.451	-30.9459	-4	0.00370102	0.0526879	m_hbincl	TRUE	FALSE	TRUE	0.86715
TG.18.2_32.1.	1–2m	Pre+Postnatal	-103.358	-188.864	-17.8526	-4	0.0181848	0.0694435	m_hbincl	TRUE
TG.18.2_32.2.	1–2m	Pre+Postnatal	-69.5303	-133.969	-5.09134	-4	0.0346457	0.0864196	m_hbincl	TRUE	FALSE	TRUE	0.86715
TG.18.2_33.0.	1–2m	Pre+Postnatal	-4.16786	-7.01347	-1.32224	-4	0.00439066	0.0526879	primiparity;m_heightincl	TRUE	FALSE	TRUE	0.86715
TG.18.2_33.1.	1–2m	Pre+Postnatal	-4.60024	-8.35833	-0.842151	-4	0.0167989	0.0679055	primiparity;m_hbincl	TRUE
TG.18.2_33.2.	1–2m	Pre+Postnatal	-1.89024	-3.54529	-0.235197	-4	0.0254918	0.0754557	primiparity;m_hbincl	TRUE	FALSE	TRUE	0.86715
TG.18.2_34.0.	1–2m	Pre+Postnatal	-109.185	-181.104	-37.2655	-4	0.00318039	0.0526879	m_muacincl	TRUE
TG.18.2_34.1.	1–2m	Pre+Postnatal	-243.65	-440.793	-46.5069	-4	0.0157921	0.0679055	m_hbincl;m_muacincl	TRUE
TG.18.2_34.2.	1–2m	Pre+Postnatal	-187.928	-343.766	-32.0906	-4	0.0184557	0.0694435	m_hbincl	TRUE	TRUE	FALSE	0.607639
TG.18.2_34.2.	1–2m	Pre+Postnatal	-187.928	-343.766	-32.0906	-4	0.0184557	0.0694435	m_hbincl	TRUE	FALSE	TRUE	0.86715
TG.18.2_34.3.	1–2m	Pre+Postnatal	-16.1833	-36.3993	4.03282	-4	0.115742	0.181589	primiparity;code_bep_n;m_hbincl;w_age;m_heightincl	FALSE
TG.18.2_34.4.	1–2m	Pre+Postnatal	-1.38438	-3.09204	0.32328	-3.17317	0.111238	0.176392	primiparity;code_bep_n;m_hbincl	FALSE	TRUE	FALSE	0.607639
TG.18.2_35.1.	1–2m	Pre+Postnatal	-5.40603	-10.3562	-0.455858	-4	0.0325466	0.0850041	primiparity;m_hbincl;w_age	TRUE
TG.18.2_35.2.	1–2m	Pre+Postnatal	-3.44601	-6.27761	-0.614417	-4	0.0174313	0.0679055	primiparity;m_hbincl	TRUE
TG.18.2_35.3.	1–2m	Pre+Postnatal	-0.980869	-2.12931	0.167573	-2.2115	0.0935227	0.153793	primiparity;m_hbincl;w_age	FALSE
TG.18.2_36.0.	1–2m	Pre+Postnatal	-15.1276	-26.4196	-3.83567	-4	0.00901551	0.0632094	primiparity;m_bmiincl;w_age;m_muacincl	TRUE
TG.18.2_36.1.	1–2m	Pre+Postnatal	-55.4735	-103.912	-7.03544	-4	0.0250978	0.074788	m_bmiincl;m_muacincl	TRUE
TG.18.2_36.2.	1–2m	Pre+Postnatal	-104.669	-213.454	4.11562	-4	0.0591914	0.112312	m_bmiincl;m_muacincl	FALSE
TG.18.2_36.3.	1–2m	Pre+Postnatal	-135.632	-265.989	-5.27421	-4	0.0415399	0.0941006	m_bmiincl;m_hbincl;GWG;m_muacincl	TRUE
TG.18.2_36.4.	1–2m	Pre+Postnatal	-54.6813	-126.87	17.5075	-4	0.136488	0.205426	m_bmiincl;m_hbincl;GWG	FALSE
TG.18.2_36.5.	1–2m	Pre+Postnatal	3.1479	-5.09255	11.3884	4	0.451311	0.530772	primiparity;m_hbincl;GWG;w_age;m_muacincl	FALSE
TG.18.2_38.4.	1–2m	Pre+Postnatal	-6.66941	-12.4595	-0.879273	-4	0.0242826	0.0738457	m_hbincl	TRUE
TG.18.2_38.5.	1–2m	Pre+Postnatal	-3.83979	-7.14439	-0.535198	-4	0.0230875	0.0717457	primiparity;m_hbincl	TRUE	TRUE	FALSE	0.86715
TG.18.2_38.6.	1–2m	Pre+Postnatal	-2.63101	-4.86532	-0.396707	-4	0.0213552	0.0701123	primiparity;code_bep_n;m_bmiincl;m_hbincl;ga_days_incl;GWG;w_age;m_heightincl;m_muacincl	TRUE
TG.18.3_30.0.	1–2m	Pre+Postnatal	1.33843	-3.15414	5.83101	3.31598	0.556752	0.625818	primiparity;code_bep_n;m_bmiincl;m_hbincl;GWG;m_heightincl	FALSE	TRUE	FALSE	0.607639
TG.18.3_32.0.	1–2m	Pre+Postnatal	0.169915	-3.46586	3.80569	0.531108	0.926493	0.94969	primiparity;code_bep_n;m_bmiincl;m_hbincl;ga_days_incl;GWG;w_age;m_heightincl;m_muacincl	FALSE
TG.18.3_32.1.	1–2m	Pre+Postnatal	2.56286	-4.93142	10.0571	4	0.500071	0.579363	m_hbincl;GWG;m_muacincl	FALSE
TG.18.3_33.2.	1–2m	Pre+Postnatal	0.0145912	-0.0390496	0.0682321	0.160933	0.591522	0.658235	primiparity;code_bep_n;m_hbincl;ga_days_incl;w_age;m_heightincl	FALSE
TG.18.3_34.0.	1–2m	Pre+Postnatal	-0.336983	-4.04263	3.36867	-0.676959	0.857542	0.8896	primiparity;code_bep_n;m_bmiincl;ga_days_incl;GWG;w_age;m_heightincl;m_muacincl	FALSE
TG.18.3_34.1.	1–2m	Pre+Postnatal	3.73324	-15.0384	22.5048	4	0.694705	0.748663	primiparity;code_bep_n;m_bmiincl;m_hbincl;GWG;w_age;m_heightincl;m_muacincl	FALSE	FALSE	TRUE	0.86715
TG.18.3_34.2.	1–2m	Pre+Postnatal	2.36173	-7.22132	11.9448	4	0.626783	0.692357	primiparity;code_bep_n;m_hbincl;ga_days_incl;GWG;w_age;m_heightincl	FALSE
TG.18.3_34.3.	1–2m	Pre+Postnatal	1.12082	-0.120413	2.36206	2.79737	0.0763846	0.132999	primiparity;w_age	FALSE	TRUE	TRUE	0.86715
TG.18.3_35.2.	1–2m	Pre+Postnatal	0.0787206	-0.175797	0.333238	0.31377	0.541773	0.610526	primiparity;code_bep_n;m_bmiincl;m_hbincl;GWG;w_age;m_heightincl;m_muacincl	FALSE	FALSE	TRUE	0.86715
TG.18.3_36.1.	1–2m	Pre+Postnatal	0.256596	-3.45983	3.97302	0.737691	0.891592	0.918485	primiparity;m_bmiincl;m_hbincl;ga_days_incl;GWG;w_age;m_muacincl	FALSE
TG.18.3_36.2.	1–2m	Pre+Postnatal	8.73843	-2.38909	19.8659	4	0.122782	0.187983	m_bmiincl;m_muacincl	FALSE	FALSE	TRUE	0.86715
TG.18.3_36.3.	1–2m	Pre+Postnatal	5.89574	-4.50619	16.2977	4	0.264369	0.342508	m_bmiincl;GWG;m_muacincl	FALSE	FALSE	TRUE	0.86715
TG.18.3_36.4.	1–2m	Pre+Postnatal	4.83388	-0.100557	9.76831	4	0.0547879	0.106692	primiparity;GWG;w_age	FALSE	FALSE	TRUE	0.86715
TG.18.3_38.5.	1–2m	Pre+Postnatal	0.142486	-0.104269	0.38924	0.465738	0.255511	0.333667	primiparity;code_bep_n;m_hbincl;w_age;m_heightincl;m_muacincl	FALSE
TG.18.3_38.6.	1–2m	Pre+Postnatal	0.0272158	-0.110741	0.165173	0.191021	0.697022	0.749341	primiparity;code_bep_n;m_bmiincl;m_hbincl;ga_days_incl;GWG;w_age;m_heightincl;m_muacincl	FALSE
TG.20.0_32.3.	1–2m	Pre+Postnatal	-0.817429	-1.52103	-0.113832	-1.82198	0.0231073	0.0717457	m_hbincl;m_muacincl	TRUE	TRUE	FALSE	0.607639
TG.20.0_32.4.	1–2m	Pre+Postnatal	-0.768556	-1.54819	0.0110765	-1.70551	0.0532991	0.105177	primiparity;m_hbincl	FALSE
TG.20.0_34.1.	1–2m	Pre+Postnatal	-1.6804	-3.0857	-0.275103	-3.87866	0.0194483	0.0696376	m_bmiincl;m_muacincl	TRUE
TG.20.1_26.1.	1–2m	Pre+Postnatal	-0.234501	-0.470182	0.00117996	-0.432716	0.0511422	0.102747	m_bmiincl;w_age;m_muacincl	FALSE
TG.20.1_30.1.	1–2m	Pre+Postnatal	-1.06639	-2.83637	0.703587	-2.41532	0.235534	0.31217	primiparity;m_bmiincl;m_hbincl;ga_days_incl;GWG;w_age;m_muacincl	FALSE
TG.20.1_32.1.	1–2m	Pre+Postnatal	-1.08923	-2.8401	0.661649	-2.46975	0.220742	0.296999	primiparity;m_bmiincl;m_hbincl;w_age;m_muacincl	FALSE
TG.20.1_32.2.	1–2m	Pre+Postnatal	-1.63986	-2.94974	-0.329974	-3.78203	0.0145165	0.0679055	m_bmiincl;w_age;m_muacincl	TRUE
TG.20.1_32.3.	1–2m	Pre+Postnatal	-0.159733	-0.345056	0.0255891	-0.254527	0.0905834	0.149513	m_bmiincl;m_hbincl;m_muacincl	FALSE
TG.20.1_34.0.	1–2m	Pre+Postnatal	-0.968705	-2.01357	0.0761638	-2.18251	0.068934	0.125251	primiparity;m_bmiincl;m_muacincl	FALSE
TG.20.1_34.1.	1–2m	Pre+Postnatal	-3.23418	-7.69383	1.22548	-4	0.153856	0.225453	m_bmiincl;w_age;m_muacincl	FALSE
TG.20.1_34.2.	1–2m	Pre+Postnatal	-4.11078	-7.44505	-0.776513	-4	0.0160439	0.0679055	m_bmiincl;m_muacincl	TRUE
TG.20.1_34.3.	1–2m	Pre+Postnatal	-0.381348	-0.933398	0.170702	-0.782691	0.174217	0.245562	m_bmiincl;m_muacincl	FALSE	TRUE	TRUE	0.86715
TG.20.2_32.0.	1–2m	Pre+Postnatal	-2.95182	-4.65866	-1.24499	-4	0.000822245	0.0454939	m_hbincl	TRUE	FALSE	TRUE	0.86715
TG.20.2_32.1.	1–2m	Pre+Postnatal	-4.52768	-7.25387	-1.80149	-4	0.0012962	0.047041	m_hbincl;w_age;m_muacincl	TRUE
TG.20.2_34.1.	1–2m	Pre+Postnatal	-11.0317	-17.7834	-4.27997	-4	0.00153988	0.0488363	m_muacincl	TRUE
TG.20.2_34.2.	1–2m	Pre+Postnatal	-6.31937	-10.4634	-2.17529	-4	0.00305177	0.0526879	m_hbincl	TRUE	TRUE	FALSE	0.607639
TG.20.2_34.2.	1–2m	Pre+Postnatal	-6.31937	-10.4634	-2.17529	-4	0.00305177	0.0526879	m_hbincl	TRUE	TRUE	TRUE	0.86715
TG.20.2_34.3.	1–2m	Pre+Postnatal	-1.07404	-1.95335	-0.194734	-2.43355	0.0170304	0.0679055	primiparity;code_bep_n;m_hbincl	TRUE
TG.20.2_34.4.	1–2m	Pre+Postnatal	-0.0241466	-0.0589092	0.0106159	0.068611	0.171856	0.243784	primiparity;code_bep_n;m_hbincl	FALSE
TG.20.2_36.5.	1–2m	Pre+Postnatal	-0.0373682	-0.215152	0.140415	0.0371006	0.678297	0.736342	primiparity;code_bep_n;m_bmiincl;m_hbincl;GWG;w_age;m_heightincl;m_muacincl	FALSE
TG.20.3_32.0.	1–2m	Pre+Postnatal	-3.39073	-5.52844	-1.25303	-4	0.00208985	0.0526879	primiparity;code_bep_n;m_hbincl;m_heightincl	TRUE	TRUE	FALSE	0.86715
TG.20.3_32.1.	1–2m	Pre+Postnatal	-3.50591	-6.46761	-0.544202	-4	0.0206768	0.0701123	m_hbincl	TRUE
TG.20.3_32.2.	1–2m	Pre+Postnatal	-2.15217	-3.85307	-0.451274	-4	0.0135125	0.0679055	m_hbincl	TRUE	FALSE	TRUE	0.86715
TG.20.3_34.0.	1–2m	Pre+Postnatal	-1.8592	-3.22781	-0.490586	-4	0.00811468	0.0618847	code_bep_n;m_hbincl;ga_days_incl;m_heightincl	TRUE
TG.20.3_34.1.	1–2m	Pre+Postnatal	-9.71416	-17.1303	-2.29797	-4	0.0106251	0.0632094	primiparity;code_bep_n;m_hbincl;m_heightincl	TRUE	TRUE	FALSE	0.607639
TG.20.3_34.2.	1–2m	Pre+Postnatal	-6.05658	-10.5068	-1.60634	-4	0.00800136	0.0618847	primiparity;code_bep_n;m_hbincl;m_heightincl	TRUE	FALSE	TRUE	0.86715
TG.20.3_34.3.	1–2m	Pre+Postnatal	-0.76689	-1.54617	0.0123909	-1.70154	0.0537031	0.105216	primiparity;code_bep_n;m_hbincl;ga_days_incl;w_age;m_heightincl	FALSE
TG.20.3_36.3.	1–2m	Pre+Postnatal	-3.56081	-6.80168	-0.319944	-4	0.0315218	0.0848223	m_hbincl;m_muacincl	TRUE
TG.20.3_36.4.	1–2m	Pre+Postnatal	-1.13628	-2.43093	0.158377	-2.58187	0.0849099	0.143775	m_hbincl	FALSE
TG.20.3_36.5.	1–2m	Pre+Postnatal	0.000967729	-0.0707391	0.0726746	0.128465	0.978746	0.987089	primiparity;code_bep_n;m_bmiincl;m_hbincl;GWG;w_age;m_heightincl;m_muacincl	FALSE
TG.20.4_30.0.	1–2m	Pre+Postnatal	-5.43711	-9.21982	-1.6544	-4	0.00515552	0.0586937	m_hbincl	TRUE
TG.20.4_32.0.	1–2m	Pre+Postnatal	-5.27658	-8.16754	-2.38562	-4	0.000427147	0.0454939	primiparity	TRUE	FALSE	TRUE	0.646199
TG.20.4_32.1.	1–2m	Pre+Postnatal	-5.36111	-9.01959	-1.70264	-4	0.00436941	0.0526879	m_muacincl	TRUE
TG.20.4_32.2.	1–2m	Pre+Postnatal	-3.20215	-5.30783	-1.09647	-4	0.00312929	0.0526879		TRUE	FALSE	TRUE	0.86715
TG.20.4_33.2.	1–2m	Pre+Postnatal	-0.0923158	-0.157389	-0.027243	-0.0938534	0.00575191	0.0618847	primiparity;code_bep_n;m_heightincl	TRUE
TG.20.4_34.0.	1–2m	Pre+Postnatal	-2.73964	-4.56542	-0.913856	-4	0.00354164	0.0526879	primiparity;code_bep_n;m_heightincl	TRUE	TRUE	FALSE	0.646199
TG.20.4_34.1.	1–2m	Pre+Postnatal	-12.1682	-20.2137	-4.12274	-4	0.00329512	0.0526879	primiparity;m_muacincl	TRUE
TG.20.4_34.2.	1–2m	Pre+Postnatal	-8.42874	-14.2203	-2.6372	-4	0.00463953	0.0542093	primiparity;m_hbincl	TRUE	TRUE	TRUE	0.86715
TG.20.4_34.3.	1–2m	Pre+Postnatal	-0.701545	-1.38303	-0.020057	-1.5458	0.0437154	0.0947226	primiparity;code_bep_n;m_hbincl;ga_days_incl;w_age;m_heightincl	TRUE
TG.20.4_36.2.	1–2m	Pre+Postnatal	-7.18241	-13.0413	-1.32348	-4	0.0166418	0.0679055	m_bmiincl;m_muacincl	TRUE	TRUE	FALSE	0.646199
TG.20.4_36.3.	1–2m	Pre+Postnatal	-5.31621	-9.39843	-1.23399	-4	0.0110713	0.0636716	m_bmiincl;m_muacincl	TRUE	TRUE	FALSE	0.607639
TG.20.4_36.4.	1–2m	Pre+Postnatal	-1.7665	-3.5948	0.0618113	-4	0.0581506	0.11177	primiparity;m_hbincl	FALSE
TG.20.4_36.5.	1–2m	Pre+Postnatal	-0.0506707	-0.262502	0.161161	0.0053974	0.636928	0.69999	primiparity;code_bep_n;m_bmiincl;m_hbincl;GWG;w_age;m_heightincl;m_muacincl	FALSE
TG.20.5_34.0.	1–2m	Pre+Postnatal	-0.341109	-1.1018	0.419579	-0.686791	0.376722	0.454523	primiparity;code_bep_n;m_bmiincl;m_hbincl;ga_days_incl;GWG;w_age;m_heightincl;m_muacincl	FALSE	TRUE	FALSE	0.607639
TG.20.5_34.1.	1–2m	Pre+Postnatal	-1.6575	-5.44241	2.12741	-3.82409	0.388003	0.463991	primiparity;code_bep_n;m_bmiincl;ga_days_incl;GWG;m_heightincl;m_muacincl	FALSE
TG.20.5_34.2.	1–2m	Pre+Postnatal	-1.43682	-3.90169	1.02805	-3.29816	0.250997	0.32874	primiparity;code_bep_n;m_bmiincl;m_hbincl;ga_days_incl;GWG;w_age;m_heightincl;m_muacincl	FALSE
TG.20.5_36.2.	1–2m	Pre+Postnatal	-0.420467	-1.75818	0.917251	-0.875921	0.535239	0.608796	primiparity;code_bep_n;m_bmiincl;m_hbincl;ga_days_incl;GWG;m_heightincl;m_muacincl	FALSE
TG.20.5_36.3.	1–2m	Pre+Postnatal	-0.275088	-1.41225	0.862069	-0.529446	0.633107	0.697518	primiparity;code_bep_n;m_bmiincl;m_hbincl;ga_days_incl;GWG;w_age;m_heightincl;m_muacincl	FALSE
TG.22.0_32.4.	1–2m	Pre+Postnatal	-0.100648	-0.187736	-0.0135603	-0.113711	0.0238242	0.0729513	m_bmiincl;m_hbincl;m_muacincl	TRUE
TG.22.1_32.5.	1–2m	Pre+Postnatal	0.00972162	-0.0400266	0.0594699	0.149328	0.69974	0.750446	primiparity;code_bep_n;m_bmiincl;m_hbincl;ga_days_incl;GWG;w_age;m_heightincl;m_muacincl	FALSE
TG.22.2_32.4.	1–2m	Pre+Postnatal	-0.0730441	-0.209204	0.0631162	-0.0479242	0.290679	0.369804	m_hbincl;GWG;w_age	FALSE
TG.22.3_30.2.	1–2m	Pre+Postnatal	-0.0263756	-0.0496624	-0.00308889	0.0632986	0.0267113	0.077515	m_hbincl	TRUE
TG.22.4_32.0.	1–2m	Pre+Postnatal	-0.52283	-0.782377	-0.263283	-1.11988	0.000108655	0.0454939		TRUE
TG.22.4_32.2.	1–2m	Pre+Postnatal	-0.483176	-0.753003	-0.213349	-1.02537	0.000542408	0.0454939	m_hbincl	TRUE	TRUE	TRUE	0.86715
TG.22.4_34.2.	1–2m	Pre+Postnatal	-1.22197	-1.85849	-0.585448	-2.7861	0.00021831	0.0454939	primiparity	TRUE	FALSE	TRUE	0.646199
TG.22.4_34.2.	1–2m	Pre+Postnatal	-1.22197	-1.85849	-0.585448	-2.7861	0.00021831	0.0454939	primiparity	TRUE	TRUE	TRUE	0.86715
TG.22.5_32.0.	1–2m	Pre+Postnatal	-1.62801	-2.80359	-0.452439	-3.75381	0.00699835	0.0618847	primiparity;code_bep_n;m_bmiincl;m_hbincl;ga_days_incl;GWG;m_heightincl;m_muacincl	TRUE
TG.22.5_32.1.	1–2m	Pre+Postnatal	-1.80508	-3.30663	-0.30354	-4	0.0188281	0.0696376	primiparity;code_bep_n;m_hbincl;ga_days_incl;GWG;m_heightincl	TRUE
TG.22.5_34.1.	1–2m	Pre+Postnatal	-3.65067	-6.5765	-0.724836	-4	0.0148461	0.0679055	primiparity;code_bep_n;m_hbincl;ga_days_incl;GWG;m_heightincl	TRUE
TG.22.5_34.2.	1–2m	Pre+Postnatal	-2.96868	-4.96742	-0.969942	-4	0.0038928	0.0526879	primiparity;code_bep_n;m_hbincl;ga_days_incl;GWG;w_age;m_heightincl;m_muacincl	TRUE
TG.22.5_34.3.	1–2m	Pre+Postnatal	-0.342121	-0.603175	-0.0810662	-0.689202	0.0105999	0.0632094	primiparity;code_bep_n;m_bmiincl;m_hbincl;ga_days_incl;GWG;w_age;m_heightincl;m_muacincl	TRUE	TRUE	FALSE	0.607639
TG.22.6_32.0.	1–2m	Pre+Postnatal	-3.43163	-7.1509	0.287629	-4	0.07025	0.125265	primiparity;code_bep_n;m_bmiincl;m_hbincl;ga_days_incl;GWG;m_heightincl;m_muacincl	FALSE
TG.22.6_32.1.	1–2m	Pre+Postnatal	-4.08349	-9.35081	1.18384	-4	0.127566	0.19397	primiparity;code_bep_n;m_bmiincl;m_hbincl;ga_days_incl;GWG;m_heightincl;m_muacincl	FALSE
TG.22.6_34.1.	1–2m	Pre+Postnatal	-12.3808	-25.6811	0.919565	-4	0.0678231	0.123924	primiparity;code_bep_n;m_bmiincl;m_hbincl;ga_days_incl;GWG;m_heightincl;m_muacincl	FALSE
TG.22.6_34.2.	1–2m	Pre+Postnatal	-9.28512	-18.3055	-0.264712	-4	0.0437345	0.0947226	primiparity;code_bep_n;m_bmiincl;m_hbincl;ga_days_incl;GWG;w_age;m_heightincl;m_muacincl	TRUE
TG.22.6_34.3.	1–2m	Pre+Postnatal	-0.936112	-2.03523	0.163006	-2.10483	0.0944126	0.154115	primiparity;code_bep_n;m_bmiincl;m_hbincl;ga_days_incl;GWG;w_age;m_heightincl;m_muacincl	FALSE
Hex3Cer.d18.1.16.0.	1–2m	Pre+Postnatal	-0.0268958	-0.051552	-0.00223964	0.0620589	0.0327417	0.0850136	m_hbincl;GWG	TRUE
Choline	1–2m	Pre+Postnatal	-27.665	-65.5685	10.2385	-4	0.151251	0.222368	m_bmiincl;m_muacincl	FALSE
C0	1–2m	Prenatal	1.32708	-2.34492	4.99908	3.28892	0.475803	0.630616	primiparity;code_bep_n;m_bmiincl;ga_days_incl;GWG;w_age;m_muacincl	FALSE
C2	1–2m	Prenatal	0.386902	-2.31623	3.09004	1.04824	0.777422	0.848097	primiparity;code_bep_n;m_bmiincl;m_hbincl;ga_days_incl;GWG;w_age;m_heightincl;m_muacincl	FALSE
C3	1–2m	Prenatal	-0.0305554	-0.167705	0.106594	0.0533372	0.660047	0.767175	code_bep_n;m_bmiincl;m_hbincl;ga_days_incl;GWG;m_heightincl;m_muacincl	FALSE
C4	1–2m	Prenatal	-0.0489983	-0.236263	0.138267	0.00938303	0.605504	0.730554	primiparity;code_bep_n;m_bmiincl;ga_days_incl;GWG;w_age;m_muacincl	FALSE
C6..C4.1.DC.	1–2m	Prenatal	-0.0105042	-0.0423305	0.0213221	0.101124	0.514846	0.664783	primiparity;m_bmiincl;GWG;w_age;m_heightincl;m_muacincl	FALSE
C12	1–2m	Prenatal	-0.0586526	-0.272991	0.155686	-0.0136254	0.589074	0.718541	primiparity;code_bep_n;m_bmiincl;m_hbincl;ga_days_incl;GWG;w_age;m_heightincl	FALSE
C12.1	1–2m	Prenatal	-0.0215547	-0.0507087	0.00759929	0.0747882	0.145922	0.345692	primiparity;code_bep_n;m_bmiincl;m_hbincl;ga_days_incl;w_age;m_heightincl	FALSE
C14	1–2m	Prenatal	-0.196546	-0.468262	0.075169	-0.342262	0.154799	0.348886	m_bmiincl;m_hbincl;m_muacincl	FALSE
C14.2.OH	1–2m	Prenatal	-0.00267087	-0.0103145	0.00497278	0.119793	0.490501	0.63679	code_bep_n;m_bmiincl;m_hbincl;ga_days_incl;GWG;w_age;m_heightincl;m_muacincl	FALSE
C18	1–2m	Prenatal	-0.00702386	-0.0124781	-0.00156963	0.109419	0.0120071	0.207249	GWG;m_muacincl	TRUE
TMAO	1–2m	Prenatal	-0.683773	-1.68354	0.31599	-1.50345	0.178323	0.359888	primiparity;code_bep_n;m_bmiincl;m_hbincl;ga_days_incl;m_heightincl;m_muacincl	FALSE
X1.Met.His	1–2m	Prenatal	0.0639178	-0.0622845	0.19012	0.278491	0.318102	0.493777	primiparity;code_bep_n;m_bmiincl;ga_days_incl;GWG;w_age;m_heightincl;m_muacincl	FALSE
X3.Met.His	1–2m	Prenatal	0.484346	0.043299	0.925394	1.28048	0.0316216	0.216	GWG	TRUE	TRUE	FALSE	0.607639
AABA	1–2m	Prenatal	-0.815461	-1.81972	0.188803	-1.81729	0.110575	0.312667	primiparity;m_bmiincl;m_hbincl;GWG;w_age;m_muacincl	FALSE
alpha.AAA	1–2m	Prenatal	0.189957	-0.488682	0.868597	0.578875	0.580607	0.714775	primiparity;m_bmiincl;m_hbincl;ga_days_incl;GWG;w_age	FALSE
Cit	1–2m	Prenatal	0.175592	-2.0484	2.39958	0.544639	0.876073	0.914442	primiparity;code_bep_n;m_bmiincl;m_hbincl;ga_days_incl;GWG;w_age;m_heightincl;m_muacincl	FALSE
Creatinine	1–2m	Prenatal	-0.00157275	-2.40466	2.40151	0.12241	0.998969	0.998969	primiparity;code_bep_n;m_bmiincl;m_hbincl;ga_days_incl;w_age;m_heightincl;m_muacincl	FALSE
Cystine	1–2m	Prenatal	-1.8465	-8.8129	5.11991	-4	0.600864	0.728917	primiparity;code_bep_n;m_hbincl;w_age;m_heightincl	FALSE
[truncated: 2,222 more rows]

## Sheet: milk_microbiome
feature	timepoint	intervention	estimate	conf_low_semi	conf_high_semi	estimate_scaled	p.value	q.value	covariate	sig	from_xgb	from_boruta	best_auc
[truncated: 552 more rows]
