# Supplementary material
Source: Research Square preprint supplement (doi:10.21203/rs.3.rs-10290866/v1)
Supplement: Supplementary file 4 [file 88d153833a65a50f3115b09a.xlsx]

## Sheet: Description
	Effect of maternal balanced energy–protein (BEP) supplementation on maternal and infant gut biomarkers. This table summarizes the associations between maternal BEP supplementation and maternal and infant gut biomarkers (including microbial taxa, pathogens, short-chain fatty acids, calprotectin) measured during pregnancy and infancy. Results are presented for each intervention comparison with the …
Column	Description
feature:	Name of the gut biomarker.
timepoint:	Sample collection time point.
intervention:	Intervention group compared with the control group.
estimate:	Adjusted regression coefficient representing the difference between the intervention and control groups in the original measurement units.
conf_low_semi:	Lower bound of the 95% confidence interval for the regression coefficient.
conf_high_semi:	Upper bound of the 95% confidence interval for the regression coefficient.
estimate_scaled:	Standardized effect size (z-score), allowing comparison of effect sizes across different biomarkers.
p.value:	Nominal P value from the adjusted regression model.
q.value:	False discovery rate (FDR)-adjusted P value.
covariate:	Covariate adjustment model used for the regression analysis.
sig:	Indicates whether the feature met the predefined significance criteria (p < 0.05).
from_xgb:	Indicates whether the feature was selected by the XGBoost feature-selection model.
from_boruta:	Indicates whether the feature was selected by the Boruta feature-selection algorithm.
best_auc:	Highest area under the receiver operating characteristic curve (AUC) achieved by the corresponding machine-learning model.

## Sheet: gut_microbiome
feature	timepoint	intervention	estimate	conf_low_semi	conf_high_semi	estimate_scaled	p.value	q.value	covariate	sig	from_xgb	from_boruta	best_auc
Bifidobacterium.infantis	Tri2, mother	Pre+Postnatal	0			0
Escherichia.coli	Tri2, mother	Pre+Postnatal	-0.00773139	-0.0184673	0.00300455	-4	0.152514	0.73443	m_bmiincl;ga_days_incl;w_age;m_heightincl;m_muacincl	FALSE
Bacteroides.fragilis_A	Tri2, mother	Pre+Postnatal	0.00154659	-0.000887069	0.00398025	4	0.205464	0.73443	primiparity;m_bmiincl;w_age;m_muacincl	FALSE
Klebsiella.pneumoniae	Tri2, mother	Pre+Postnatal	-0.0112341	-0.0283323	0.00586418	-4	0.190222	0.73443	m_bmiincl;m_hbincl;ga_days_incl;GWG;w_age;m_heightincl;m_muacincl	FALSE
Parolsenella.uli_B	Tri2, mother	Pre+Postnatal	0			0
Bacteroides.fragilis	Tri2, mother	Pre+Postnatal	-0.0010767	-0.00315434	0.00100094	-4	0.298706	0.751571	primiparity;m_bmiincl;m_hbincl;ga_days_incl;GWG;w_age;m_heightincl;m_muacincl	FALSE
Enterococcus_B.faecium	Tri2, mother	Pre+Postnatal	0			0
Parabacteroides.goldsteinii	Tri2, mother	Pre+Postnatal	0.000155177	-0.000425906	0.00073626	4	0.59024	0.871672	primiparity;m_bmiincl;ga_days_incl;GWG;w_age;m_heightincl;m_muacincl	FALSE
Escherichia.albertii	Tri2, mother	Pre+Postnatal	0			0
Megasphaera.sp001546855	Tri2, mother	Pre+Postnatal	0			0
Veillonella_A.sp000431435	Tri2, mother	Pre+Postnatal	0			0
Phocaeicola.dorei	Tri2, mother	Pre+Postnatal	0.00100059	-0.001924	0.00392518	4	0.490899	0.834457	primiparity;m_bmiincl;m_hbincl;GWG;w_age;m_heightincl;m_muacincl	FALSE
Prevotella.sp900544825	Tri2, mother	Pre+Postnatal	0.00246024	-0.0128206	0.0177411	4	0.745086	0.913458	primiparity;m_bmiincl;m_hbincl;GWG;w_age;m_heightincl;m_muacincl	FALSE
Prevotella.sp900290275	Tri2, mother	Pre+Postnatal	-0.00917244	-0.0183103	-3.45679e-05	-4	0.0491883	0.73443	primiparity;m_hbincl;ga_days_incl;GWG;w_age;m_heightincl	TRUE
Unknown_Prevotella	Tri2, mother	Pre+Postnatal	-0.00306211	-0.0430364	0.0369122	-4	0.877102	0.957064	primiparity;m_bmiincl;GWG;w_age;m_heightincl;m_muacincl	FALSE
Prevotella.sp900548535	Tri2, mother	Pre+Postnatal	-0.000346365	-0.0284189	0.0277262	-4	0.980142	0.991242	primiparity;m_bmiincl;m_hbincl;m_heightincl;m_muacincl	FALSE
Victivallis.vadensis	Tri2, mother	Pre+Postnatal	5.01495e-05	-0.000153463	0.000253762	4	0.618986	0.872968	primiparity;m_bmiincl;m_hbincl;ga_days_incl;GWG;w_age;m_heightincl;m_muacincl	FALSE
Akkermansia.muciniphila_C	Tri2, mother	Pre+Postnatal	0			0
Campylobacter_D.coli	Tri2, mother	Pre+Postnatal	0			0
Streptococcus.sp000187445	Tri2, mother	Pre+Postnatal	0			0
Unknown_Campylobacter	Tri2, mother	Pre+Postnatal	-0.00027145	-0.00147345	0.00093055	-4	0.648309	0.888651	primiparity;m_bmiincl;m_hbincl;ga_days_incl;GWG;w_age;m_heightincl;m_muacincl	FALSE
Flavonifractor.plautii	Tri2, mother	Pre+Postnatal	5.38388e-05	-3.30569e-05	0.000140735	4	0.216557	0.73443	primiparity;m_hbincl;GWG;w_age;m_heightincl	FALSE
Unknown_Campylobacter_D	Tri2, mother	Pre+Postnatal	1.96305e-05	-0.000106204	0.000145465	3.59923	0.753155	0.915227	primiparity;m_hbincl;GWG;w_age;m_heightincl	FALSE
Prevotella.sp002299635	Tri2, mother	Pre+Postnatal	0.00406484	-0.0155744	0.0237041	4	0.675844	0.894593	primiparity;m_bmiincl;m_hbincl;ga_days_incl;GWG;w_age;m_heightincl;m_muacincl	FALSE
Bifidobacterium.breve	Tri2, mother	Pre+Postnatal	0			0
Parabacteroides.distasonis	Tri2, mother	Pre+Postnatal	0.000600316	-0.00139666	0.00259729	4	0.544992	0.850731	primiparity;m_bmiincl;m_hbincl;w_age;m_heightincl;m_muacincl	FALSE
Bifidobacterium.bifidum	Tri2, mother	Pre+Postnatal	0			0
Treponema_D.sp900541945	Tri2, mother	Pre+Postnatal	-0.00833822	-0.0463521	0.0296757	-4	0.658592	0.891378	m_hbincl;GWG;w_age;m_heightincl;m_muacincl	FALSE
Acetatifactor.sp900066365	Tri2, mother	Pre+Postnatal	0.00227087	-0.00477799	0.00931973	4	0.515996	0.842261	primiparity;m_bmiincl;m_hbincl;ga_days_incl;GWG;w_age;m_heightincl;m_muacincl	FALSE
Klebsiella_B.aerogenes	Tri2, mother	Pre+Postnatal	0			0
Bifidobacterium.longum	Tri2, mother	Pre+Postnatal	0			0
Akkermansia.muciniphila	Tri2, mother	Pre+Postnatal	0.000391559	-0.00538236	0.00616548	4	0.891288	0.962592	primiparity;m_hbincl;GWG;w_age	FALSE
Campylobacter_D.upsaliensis	Tri2, mother	Pre+Postnatal	0			0
RC9.sp000431015	Tri2, mother	Pre+Postnatal	-0.00700982	-0.0141057	8.60976e-05	-4	0.0526783	0.73443	primiparity;m_bmiincl;m_hbincl;ga_days_incl;GWG;w_age;m_heightincl	FALSE
Campylobacter_D.jejuni	Tri2, mother	Pre+Postnatal	0			0
Acinetobacter.baumannii	Tri2, mother	Pre+Postnatal	0			0
Prevotella.sp000436035	Tri2, mother	Pre+Postnatal	-0.0101212	-0.0314513	0.011209	-4	0.342012	0.751571	primiparity;m_bmiincl;m_hbincl;w_age	FALSE
Prevotella.sp900551985	Tri2, mother	Pre+Postnatal	0.00180919	-0.00825047	0.0118689	4	0.716775	0.902872	primiparity;m_bmiincl;m_hbincl;w_age;m_heightincl;m_muacincl	FALSE
Bacteroides.thetaiotaomicron	Tri2, mother	Pre+Postnatal	0.000636101	-0.000246562	0.00151876	4	0.152227	0.73443	primiparity;m_bmiincl;m_hbincl;GWG;w_age	FALSE
Fusobacterium_A.mortiferum	Tri2, mother	Pre+Postnatal	1.64095e-05	-2.04881e-05	5.33071e-05	3.00866	0.37246	0.768075	primiparity;m_bmiincl;m_hbincl;w_age;m_muacincl	FALSE
Prevotella.sp000434975	Tri2, mother	Pre+Postnatal	0.00521677	-0.00529687	0.0157304	4	0.319378	0.751571	primiparity;m_bmiincl;m_hbincl;ga_days_incl;GWG;w_age;m_heightincl;m_muacincl	FALSE
RC9.sp000433355	Tri2, mother	Pre+Postnatal	-0.00223977	-0.0248212	0.0203416	-4	0.841167	0.942601	m_bmiincl;m_hbincl;ga_days_incl;GWG;w_age;m_heightincl;m_muacincl	FALSE
Phocaeicola.sp000434735	Tri2, mother	Pre+Postnatal	0.000570929	-0.0001168	0.00125866	4	0.100823	0.73443	m_bmiincl;m_hbincl;GWG;m_muacincl	FALSE
Prevotella.copri	Tri2, mother	Pre+Postnatal	0.014207	-0.00782072	0.0362348	4	0.198513	0.73443	primiparity;m_bmiincl;ga_days_incl;GWG;m_heightincl;m_muacincl	FALSE
CAG.488.sp900554995	Tri2, mother	Pre+Postnatal	-0.00186568	-0.00432983	0.000598466	-4	0.132693	0.73443	primiparity;m_bmiincl;m_hbincl;ga_days_incl;GWG;w_age;m_heightincl;m_muacincl	FALSE
Prevotella.sp000434515	Tri2, mother	Pre+Postnatal	0.00416747	-0.0157023	0.0240373	4	0.671779	0.893397	primiparity;m_bmiincl;m_hbincl;ga_days_incl;GWG;w_age;m_heightincl;m_muacincl	FALSE
Veillonella_A.seminalis	Tri2, mother	Pre+Postnatal	0			0
Prevotella.copri_A	Tri2, mother	Pre+Postnatal	-0.000279768	-0.0149331	0.0143736	-4	0.96922	0.987074	primiparity;m_bmiincl;m_hbincl;ga_days_incl;GWG;w_age;m_muacincl	FALSE
Prevotella.sp900551275	Tri2, mother	Pre+Postnatal	0.00594301	-0.0220181	0.0339041	4	0.668509	0.892326	primiparity;m_bmiincl;m_hbincl;GWG;w_age	FALSE
Mesosutterella.multiformis	Tri2, mother	Pre+Postnatal	1.03128e-05	-2.98543e-05	5.04799e-05	1.89083	0.604912	0.872968	primiparity;m_hbincl;ga_days_incl;GWG;w_age;m_muacincl	FALSE
Parabacteroides.merdae	Tri2, mother	Pre+Postnatal	0.00107273	-0.000608722	0.00275417	4	0.203742	0.73443	primiparity;m_bmiincl;GWG;w_age	FALSE
Ruthenibacterium.lactatiformans	Tri2, mother	Pre+Postnatal	0.000249787	-0.000173556	0.00067313	4	0.238782	0.739268	primiparity;GWG;w_age;m_heightincl;m_muacincl	FALSE
Prevotella.sp900313215	Tri2, mother	Pre+Postnatal	-0.00238027	-0.013518	0.00875742	-4	0.665951	0.892326	primiparity;m_bmiincl;m_hbincl;ga_days_incl;GWG;w_age;m_heightincl;m_muacincl	FALSE
Clostridium.neonatale	Tri2, mother	Pre+Postnatal	0			0
Ruminococcus_B.gnavus	Tri2, mother	Pre+Postnatal	8.00515e-05	-9.99485e-05	0.000260051	4	0.37246	0.768075	primiparity;m_bmiincl;m_hbincl;w_age;m_muacincl	FALSE
Unknown_Veillonella	Tri2, mother	Pre+Postnatal	0.000194488	-0.0005009	0.000889876	4	0.573196	0.86342	primiparity;m_bmiincl;m_hbincl;w_age;m_heightincl;m_muacincl	FALSE
C941.sp004557565	Tri2, mother	Pre+Postnatal	-0.0103072	-0.0237769	0.00316259	-4	0.128758	0.73443	primiparity;m_bmiincl;m_hbincl;ga_days_incl;GWG;w_age;m_heightincl;m_muacincl	FALSE
Prevotella.sp002251295	Tri2, mother	Pre+Postnatal	0.00584306	-0.00711333	0.0187994	4	0.364791	0.768075	primiparity;m_bmiincl;m_hbincl;ga_days_incl;GWG;w_age;m_heightincl;m_muacincl	FALSE
Prevotella.stercorea	Tri2, mother	Pre+Postnatal	-0.00159781	-0.0121185	0.00892291	-4	0.758827	0.915227	primiparity;m_bmiincl;m_hbincl;ga_days_incl;GWG;w_age;m_heightincl;m_muacincl	FALSE
Megasphaera.sp900540735	Tri2, mother	Pre+Postnatal	0			0
Prevotella.sp900546535	Tri2, mother	Pre+Postnatal	-0.00210597	-0.0252765	0.0210645	-4	0.85429	0.943702	primiparity;m_hbincl;ga_days_incl;GWG;w_age;m_heightincl;m_muacincl	FALSE
Succinivibrio.sp000431835	Tri2, mother	Pre+Postnatal	-0.00259853	-0.0234533	0.0182563	-4	0.801077	0.936259	primiparity;m_bmiincl;m_hbincl;ga_days_incl;GWG;w_age;m_heightincl;m_muacincl	FALSE
Escherichia.sp000208585	Tri2, mother	Pre+Postnatal	0			0
Prevotellamassilia.sp900540885	Tri2, mother	Pre+Postnatal	0.00964057	-0.00900865	0.0282898	4	0.300566	0.751571	primiparity;m_hbincl;GWG;w_age;m_heightincl;m_muacincl	FALSE
Unknown_UBA4334	Tri2, mother	Pre+Postnatal	0.000796583	-0.00456113	0.0061543	4	0.763737	0.916011	primiparity;m_bmiincl;m_hbincl;ga_days_incl;GWG;w_age;m_heightincl;m_muacincl	FALSE
Prevotella.sp900546575	Tri2, mother	Pre+Postnatal	0.000672756	-0.00176381	0.00310932	4	0.578396	0.865358	primiparity;m_bmiincl;m_hbincl;ga_days_incl;m_heightincl	FALSE
Treponema_D.sp900541995	Tri2, mother	Pre+Postnatal	0.00142142	-0.00578125	0.00862408	4	0.690889	0.89924	primiparity;ga_days_incl;GWG;w_age;m_heightincl	FALSE
Sutterella.wadsworthensis	Tri2, mother	Pre+Postnatal	0			0
Unknown_RC9	Tri2, mother	Pre+Postnatal	0.00303379	-0.0113434	0.017411	4	0.670205	0.892326	primiparity;m_bmiincl;m_hbincl;ga_days_incl;w_age;m_heightincl;m_muacincl	FALSE
Phocaeicola.plebeius_A	Tri2, mother	Pre+Postnatal	7.97489e-05	-0.000230864	0.000390362	4	0.604912	0.872968	primiparity;m_hbincl;ga_days_incl;GWG;w_age;m_muacincl	FALSE
RC9.sp900544195	Tri2, mother	Pre+Postnatal	0.00526064	-0.00825705	0.0187783	4	0.433787	0.81213	primiparity;m_bmiincl;ga_days_incl;GWG;w_age;m_heightincl;m_muacincl	FALSE
Bacteroides.ovatus	Tri2, mother	Pre+Postnatal	0.000484832	-0.000876008	0.00184567	4	0.473293	0.823828	primiparity;m_bmiincl;m_hbincl;GWG;w_age;m_heightincl;m_muacincl	FALSE
Citrobacter_A.sedlakii	Tri2, mother	Pre+Postnatal	0			0
Prevotellamassilia.timonensis	Tri2, mother	Pre+Postnatal	-0.00200734	-0.00854542	0.00453074	-4	0.536154	0.849215	primiparity;m_bmiincl;m_hbincl;GWG;w_age;m_heightincl;m_muacincl	FALSE
Helicobacter_C.cinaedi	Tri2, mother	Pre+Postnatal	0			0
Enterocloster.sp900541315	Tri2, mother	Pre+Postnatal	-1.53317e-05	-4.77152e-05	1.70518e-05	-2.81104	0.343077	0.751571	m_bmiincl;ga_days_incl;w_age;m_muacincl	FALSE
Prevotella.sp900556795	Tri2, mother	Pre+Postnatal	0.00130921	-0.0173183	0.0199367	4	0.887059	0.962592	primiparity;m_hbincl;ga_days_incl;GWG;w_age;m_heightincl;m_muacincl	FALSE
Prevotella.sp002300055	Tri2, mother	Pre+Postnatal	0.00670486	-0.00748212	0.0208918	4	0.343609	0.751571	primiparity;m_hbincl;GWG;w_age;m_heightincl	FALSE
Mediterraneibacter.sp900555215	Tri2, mother	Pre+Postnatal	0			0
Enterobacter.cloacae	Tri2, mother	Pre+Postnatal	-0.00881005	-0.0223513	0.00473123	-4	0.19471	0.73443	m_bmiincl;m_hbincl;ga_days_incl;GWG;m_heightincl;m_muacincl	FALSE
Helicobacter_B.fennelliae	Tri2, mother	Pre+Postnatal	0			0
Hungatella.sp005845265	Tri2, mother	Pre+Postnatal	0			0
CAG.45.sp900066395	Tri2, mother	Pre+Postnatal	-0.00115107	-0.00813918	0.00583705	-4	0.739423	0.910402	primiparity;m_bmiincl;m_hbincl;ga_days_incl;GWG;m_heightincl;m_muacincl	FALSE
Megasphaera.sp000417505	Tri2, mother	Pre+Postnatal	2.33075e-05	-6.74727e-05	0.000114088	4	0.604912	0.872968	primiparity;m_hbincl;ga_days_incl;GWG;w_age;m_muacincl	FALSE
RC9.sp000432515	Tri2, mother	Pre+Postnatal	0.00514002	-0.0058068	0.0160868	4	0.345653	0.751571	primiparity;m_bmiincl;m_hbincl;ga_days_incl;GWG;w_age;m_heightincl;m_muacincl	FALSE
Ruminococcus_E.sp003526955	Tri2, mother	Pre+Postnatal	-0.00105823	-0.00602469	0.00390823	-4	0.667187	0.892326	primiparity;m_bmiincl;m_hbincl;ga_days_incl;GWG;w_age;m_muacincl	FALSE
Veillonella.parvula_A	Tri2, mother	Pre+Postnatal	8.52204e-05	-0.000209006	0.000379446	4	0.560003	0.851959	primiparity;m_bmiincl;m_hbincl;m_heightincl;m_muacincl	FALSE
Prevotella.sp002265625	Tri2, mother	Pre+Postnatal	0.0025478	-0.0050138	0.0101094	4	0.497812	0.834743	primiparity;m_bmiincl;ga_days_incl;GWG;m_heightincl;m_muacincl	FALSE
Duodenibacillus.massiliensis	Tri2, mother	Pre+Postnatal	-0.00083466	-0.00220107	0.000531751	-4	0.222447	0.73443	m_bmiincl;m_hbincl;ga_days_incl;GWG;w_age;m_heightincl;m_muacincl	FALSE
CAG.279.sp000437795	Tri2, mother	Pre+Postnatal	0.00707229	-0.00485392	0.0189985	4	0.235934	0.735352	primiparity;m_bmiincl;m_hbincl;GWG;w_age;m_heightincl;m_muacincl	FALSE
Parabacteroides.sp900155425	Tri2, mother	Pre+Postnatal	0.000286746	-0.000532989	0.00110648	4	0.480917	0.827496	primiparity;m_bmiincl;m_hbincl;ga_days_incl;GWG;w_age;m_heightincl;m_muacincl	FALSE
Prevotella.sp900543975	Tri2, mother	Pre+Postnatal	-0.00427496	-0.0104345	0.00188454	-4	0.167099	0.73443	primiparity;m_bmiincl;m_hbincl;ga_days_incl;w_age;m_heightincl;m_muacincl	FALSE
Streptococcus.lutetiensis	Tri2, mother	Pre+Postnatal	-4.12814e-05	-0.000128476	4.59131e-05	-4	0.343077	0.751571	m_bmiincl;ga_days_incl;w_age;m_muacincl	FALSE
Bilophila.wadsworthia	Tri2, mother	Pre+Postnatal	0.000555643	-0.000556669	0.00166796	4	0.316871	0.751571	primiparity;m_bmiincl;m_hbincl;GWG;w_age;m_muacincl	FALSE
RC9.sp000432655	Tri2, mother	Pre+Postnatal	-0.0070885	-0.0153789	0.00120187	-4	0.0914615	0.73443	m_bmiincl;m_hbincl;m_muacincl	FALSE
Prevotella.sp000436915	Tri2, mother	Pre+Postnatal	0.00593996	-0.00233513	0.014215	4	0.153806	0.73443	primiparity;m_hbincl;ga_days_incl;w_age;m_heightincl	FALSE
Lactobacillus.crispatus	Tri2, mother	Pre+Postnatal	0			0
Klebsiella.quasipneumoniae	Tri2, mother	Pre+Postnatal	-0.00198699	-0.00556029	0.0015863	-4	0.265768	0.748923	m_bmiincl;m_hbincl;ga_days_incl;GWG;w_age;m_heightincl;m_muacincl	FALSE
SFDB01.sp004558825	Tri2, mother	Pre+Postnatal	0.000115131	-0.000924949	0.00115521	4	0.823502	0.938259	primiparity;m_hbincl;GWG;w_age	FALSE
Unknown_Agathobacter	Tri2, mother	Pre+Postnatal	0.00170448	-0.000687345	0.00409631	4	0.156538	0.73443	primiparity;m_bmiincl;GWG;w_age;m_heightincl;m_muacincl	FALSE
Prevotellamassilia.sp900546605	Tri2, mother	Pre+Postnatal	0			0
Unknown_Faecalibacterium	Tri2, mother	Pre+Postnatal	-0.00267512	-0.0113461	0.00599588	-4	0.534188	0.848416	primiparity;m_bmiincl;ga_days_incl;GWG;w_age;m_heightincl;m_muacincl	FALSE
Prevotellamassilia.sp900539625	Tri2, mother	Pre+Postnatal	-0.00798073	-0.0215512	0.00558978	-4	0.239751	0.740294	primiparity;m_bmiincl;m_hbincl;ga_days_incl;w_age;m_heightincl;m_muacincl	FALSE
Citrobacter.werkmanii	Tri2, mother	Pre+Postnatal	-9.97099e-05	-0.000251666	5.22462e-05	-4	0.191014	0.73443	m_bmiincl;m_hbincl;ga_days_incl;GWG;m_heightincl;m_muacincl	FALSE
RUG572.sp900547945	Tri2, mother	Pre+Postnatal	-0.00564459	-0.0126682	0.00137906	-4	0.111544	0.73443	primiparity;m_bmiincl;m_hbincl;ga_days_incl;m_heightincl;m_muacincl	FALSE
CAG.180.sp000432435	Tri2, mother	Pre+Postnatal	0.000719289	-0.00165522	0.0030938	4	0.541211	0.850439	primiparity;m_bmiincl;m_hbincl;ga_days_incl;GWG;w_age;m_heightincl;m_muacincl	FALSE
Enterobacter.roggenkampii	Tri2, mother	Pre+Postnatal	-0.00370338	-0.00996145	0.00255469	-4	0.236883	0.735352	m_bmiincl;m_hbincl;ga_days_incl;GWG;w_age;m_heightincl;m_muacincl	FALSE
Dialister.sp900543455	Tri2, mother	Pre+Postnatal	-0.00444091	-0.0092309	0.000349094	-4	0.0681208	0.73443	primiparity;m_bmiincl;ga_days_incl;m_heightincl;m_muacincl	FALSE
Escherichia.fergusonii	Tri2, mother	Pre+Postnatal	0			0
CAG.873.sp001701165	Tri2, mother	Pre+Postnatal	0.000212149	-0.00465818	0.00508248	4	0.92998	0.975345	primiparity;m_bmiincl;ga_days_incl;GWG;w_age	FALSE
Campylobacter_D.sp900539255	Tri2, mother	Pre+Postnatal	7.31254e-05	-0.00238967	0.00253592	4	0.952149	0.979136	primiparity;m_bmiincl;ga_days_incl;GWG;w_age;m_heightincl;m_muacincl	FALSE
UBA4248.sp004554395	Tri2, mother	Pre+Postnatal	0.000587009	-0.00042166	0.00159568	4	0.245135	0.743284	m_bmiincl;m_hbincl;GWG;m_heightincl;m_muacincl	FALSE
Unknown_Lachnospiraceae	Tri2, mother	Pre+Postnatal	0.00695239	-0.00409487	0.0179996	4	0.209573	0.73443	primiparity;m_bmiincl;m_hbincl;w_age;m_heightincl	FALSE
Unknown_CAG.274	Tri2, mother	Pre+Postnatal	0			0
Unknown_W0P29.029	Tri2, mother	Pre+Postnatal	0.00632284	-0.00388221	0.0165279	4	0.216557	0.73443	primiparity;m_hbincl;GWG;w_age;m_heightincl	FALSE
Megasphaera.sp900539295	Tri2, mother	Pre+Postnatal	0			0
Alistipes.obesi	Tri2, mother	Pre+Postnatal	0.000649397	-0.000724441	0.00202323	4	0.343199	0.751571	primiparity;m_bmiincl;m_hbincl;GWG;w_age;m_muacincl	FALSE
Prevotellamassilia.sp900543155	Tri2, mother	Pre+Postnatal	0.00378297	-0.00744578	0.0150117	4	0.497861	0.834743	primiparity;m_hbincl;GWG;w_age;m_heightincl;m_muacincl	FALSE
Unknown_C941	Tri2, mother	Pre+Postnatal	4.0979e-05	-0.000181791	0.000263749	4	0.710848	0.902872	primiparity;m_bmiincl;GWG;w_age;m_muacincl	FALSE
Bacteroides.xylanisolvens	Tri2, mother	Pre+Postnatal	0.00024719	-0.00027257	0.000766949	4	0.34029	0.751571	primiparity;m_bmiincl;GWG;w_age;m_heightincl;m_muacincl	FALSE
Bacteroides.uniformis	Tri2, mother	Pre+Postnatal	0.00117432	-0.00149549	0.00384414	4	0.377667	0.773318	primiparity;m_bmiincl;GWG;w_age;m_muacincl	FALSE
Acetatifactor.sp003447295	Tri2, mother	Pre+Postnatal	0.00123285	-0.000709994	0.0031757	4	0.205157	0.73443	primiparity;m_bmiincl;m_hbincl;ga_days_incl;GWG;w_age;m_heightincl;m_muacincl	FALSE
Clostridium_Q.symbiosum	Tri2, mother	Pre+Postnatal	0			0
COE1.sp001916965	Tri2, mother	Pre+Postnatal	0.00119198	-7.93166e-05	0.00246327	4	0.0651797	0.73443	primiparity;m_bmiincl;m_hbincl;GWG;w_age;m_muacincl	FALSE
Collinsella.sp900556495	Tri2, mother	Pre+Postnatal	0			0
UBA4372.sp900543815	Tri2, mother	Pre+Postnatal	0.00113933	-0.00276126	0.00503991	4	0.556389	0.851959	primiparity;m_bmiincl;m_hbincl;GWG;w_age;m_muacincl	FALSE
Prevotellamassilia.sp900541575	Tri2, mother	Pre+Postnatal	-0.00165669	-0.00923367	0.0059203	-4	0.658744	0.891378	primiparity;m_bmiincl;m_hbincl;ga_days_incl;GWG;w_age;m_heightincl;m_muacincl	FALSE
CAG.488.sp000434915	Tri2, mother	Pre+Postnatal	-0.00142033	-0.0040827	0.00124204	-4	0.28562	0.751571	primiparity;m_bmiincl;m_hbincl;ga_days_incl;m_heightincl;m_muacincl	FALSE
Lactobacillus.paragasseri	Tri2, mother	Pre+Postnatal	0			0
CAG.488.sp000434055	Tri2, mother	Pre+Postnatal	-7.22615e-05	-0.00216132	0.0020168	-4	0.944211	0.977569	primiparity;m_bmiincl;m_hbincl;ga_days_incl;GWG;w_age;m_heightincl;m_muacincl	FALSE
Unknown_CAG.180	Tri2, mother	Pre+Postnatal	0.00349322	0.000333386	0.00665305	4	0.0312955	0.73443	primiparity;m_bmiincl;m_hbincl;GWG;m_heightincl;m_muacincl	TRUE
Gemmiger.formicilis	Tri2, mother	Pre+Postnatal	0.000545143	-0.00253236	0.00362264	4	0.720852	0.902872	primiparity;m_bmiincl;m_hbincl;GWG;m_heightincl;m_muacincl	FALSE
CAG.95.sp000438155	Tri2, mother	Pre+Postnatal	-0.000109923	-0.00420843	0.00398858	-4	0.956772	0.981283	primiparity;m_bmiincl;m_hbincl;ga_days_incl;w_age;m_heightincl;m_muacincl	FALSE
Faecalibacterium.prausnitzii_E	Tri2, mother	Pre+Postnatal	-0.00483989	-0.0135083	0.00382849	-4	0.264161	0.748923	primiparity;m_bmiincl;ga_days_incl;GWG;w_age;m_heightincl	FALSE
Collinsella.aerofaciens_H	Tri2, mother	Pre+Postnatal	0			0
ER4.sp900317525	Tri2, mother	Pre+Postnatal	-0.00266838	-0.0131863	0.00784952	-4	0.608534	0.872968	primiparity;m_bmiincl;m_hbincl;ga_days_incl;GWG;w_age;m_heightincl;m_muacincl	FALSE
Unknown_Acetatifactor	Tri2, mother	Pre+Postnatal	0.00011128	-0.00512158	0.00534414	4	0.965718	0.985236	primiparity;m_bmiincl;m_hbincl;ga_days_incl;GWG;w_age;m_muacincl	FALSE
Unknown_CAG.95	Tri2, mother	Pre+Postnatal	0.000451124	-0.00152871	0.00243096	4	0.64599	0.888406	primiparity;m_hbincl;ga_days_incl;GWG;w_age;m_heightincl	FALSE
Citrobacter_B.koseri	Tri2, mother	Pre+Postnatal	0			0
Morganella.morganii	Tri2, mother	Pre+Postnatal	0			0
Streptococcus.pasteurianus	Tri2, mother	Pre+Postnatal	0			0
Bacteroides.caccae	Tri2, mother	Pre+Postnatal	0.000526545	-0.000454083	0.00150717	4	0.282557	0.751571	primiparity;m_bmiincl;m_hbincl;GWG;m_heightincl;m_muacincl	FALSE
Prevotella.sp900544495	Tri2, mother	Pre+Postnatal	-0.000211396	-0.00100709	0.0005843	-4	0.591798	0.871672	primiparity;m_bmiincl;m_hbincl;ga_days_incl;GWG;w_age;m_heightincl;m_muacincl	FALSE
ER4.sp000765235	Tri2, mother	Pre+Postnatal	-0.00188081	-0.00969742	0.0059358	-4	0.627065	0.877135	primiparity;m_bmiincl;m_hbincl;ga_days_incl;GWG;w_age;m_heightincl;m_muacincl	FALSE
Lactobacillus.gasseri	Tri2, mother	Pre+Postnatal	0			0
UBA7173.sp900545955	Tri2, mother	Pre+Postnatal	4.07775e-05	-1.21612e-05	9.37162e-05	4	0.126622	0.73443	primiparity;m_bmiincl;m_hbincl;GWG;w_age;m_muacincl	FALSE
Ruminococcus_E.sp900543095	Tri2, mother	Pre+Postnatal	0			0
Clostridium.butyricum	Tri2, mother	Pre+Postnatal	0			0
RC9.sp900541925	Tri2, mother	Pre+Postnatal	0.00148548	-0.0015205	0.00449147	4	0.321317	0.751571	primiparity;m_bmiincl;m_hbincl;ga_days_incl;GWG;w_age;m_heightincl;m_muacincl	FALSE
Treponema_D.succinifaciens	Tri2, mother	Pre+Postnatal	-0.00323317	-0.00932667	0.00286034	-4	0.287532	0.751571	primiparity;m_bmiincl;m_hbincl;ga_days_incl;GWG;w_age;m_heightincl;m_muacincl	FALSE
CAG.83.sp900556015	Tri2, mother	Pre+Postnatal	-0.00224386	-0.0117028	0.00721505	-4	0.631916	0.879682	primiparity;m_bmiincl;m_hbincl;ga_days_incl;GWG;w_age;m_heightincl;m_muacincl	FALSE
Ruminococcus_E.bromii_B	Tri2, mother	Pre+Postnatal	-0.003786	-0.0109706	0.00339857	-4	0.290782	0.751571	primiparity;m_bmiincl;m_hbincl;ga_days_incl;GWG;w_age;m_heightincl;m_muacincl	FALSE
Agathobacter.sp900548765	Tri2, mother	Pre+Postnatal	0.00300782	-0.000865068	0.0068807	4	0.123495	0.73443	primiparity;m_bmiincl;m_hbincl;GWG;w_age;m_heightincl;m_muacincl	FALSE
Zag111.sp002103105	Tri2, mother	Pre+Postnatal	-8.15811e-05	-0.000809876	0.000646714	-4	0.82079	0.938259	primiparity;m_bmiincl;m_hbincl;ga_days_incl;GWG;w_age;m_heightincl;m_muacincl	FALSE
CAG.873.sp900540625	Tri2, mother	Pre+Postnatal	6.74276e-05	-8.41869e-05	0.000219042	4	0.37246	0.768075	primiparity;m_bmiincl;m_hbincl;w_age;m_muacincl	FALSE
CAG.95.sp900553305	Tri2, mother	Pre+Postnatal	0.000353402	-0.00237336	0.00308016	4	0.79384	0.933256	primiparity;m_hbincl;GWG;w_age;m_heightincl	FALSE
Unknown_Prevotellamassilia	Tri2, mother	Pre+Postnatal	0.000634785	-0.0010861	0.00235567	4	0.457534	0.814039	primiparity;m_bmiincl;m_hbincl;ga_days_incl;GWG;w_age;m_heightincl;m_muacincl	FALSE
Eubacterium_R.sp000433975	Tri2, mother	Pre+Postnatal	0.000563191	-6.86498e-05	0.00119503	4	0.0787525	0.73443	primiparity;m_bmiincl;m_hbincl;ga_days_incl;GWG;w_age;m_heightincl;m_muacincl	FALSE
Prevotella.sp003447235	Tri2, mother	Pre+Postnatal	-0.00292905	-0.00739566	0.00153755	-4	0.191704	0.73443	primiparity;m_bmiincl;w_age;m_muacincl	FALSE
Salmonella.enterica	Tri2, mother	Pre+Postnatal	0.00171806	-0.00508039	0.00851651	4	0.610573	0.872968	primiparity;m_bmiincl;m_hbincl;GWG;w_age;m_heightincl	FALSE
Comamonas.kerstersii	Tri2, mother	Pre+Postnatal	0.000108767	-0.000940929	0.00115846	4	0.834331	0.942601	primiparity;m_bmiincl;GWG;w_age;m_heightincl;m_muacincl	FALSE
Unknown_RUG410	Tri2, mother	Pre+Postnatal	0.000795177	-0.00305279	0.00464314	4	0.676325	0.894593	primiparity;m_bmiincl;m_hbincl;ga_days_incl;GWG;w_age;m_heightincl;m_muacincl	FALSE
Prevotella.sp900553155	Tri2, mother	Pre+Postnatal	0.000596941	-0.000312056	0.00150594	4	0.190193	0.73443	primiparity;m_bmiincl;m_hbincl;ga_days_incl;GWG;w_age;m_heightincl;m_muacincl	FALSE
Faecalibacterium.prausnitzii_F	Tri2, mother	Pre+Postnatal	-0.00161744	-0.00356656	0.000331676	-4	0.100782	0.73443	primiparity;m_bmiincl;m_hbincl;GWG;w_age;m_muacincl	FALSE
Unknown_Lancefieldella	Tri2, mother	Pre+Postnatal	0			0
Bacteroides.cellulosilyticus	Tri2, mother	Pre+Postnatal	-0.000958195	-0.0025193	0.000602905	-4	0.220534	0.73443	m_bmiincl;ga_days_incl;GWG;w_age;m_heightincl;m_muacincl	FALSE
CAG.83.sp003487665	Tri2, mother	Pre+Postnatal	-0.00149198	-0.00593234	0.00294839	-4	0.498258	0.834743	primiparity;m_bmiincl;m_hbincl;ga_days_incl;GWG;w_age;m_heightincl;m_muacincl	FALSE
CAG.83.sp900313295	Tri2, mother	Pre+Postnatal	-0.00234798	-0.00522016	0.0005242	-4	0.105641	0.73443	primiparity;m_bmiincl;ga_days_incl;GWG;w_age;m_heightincl;m_muacincl	FALSE
Unknown_Ruminococcus_E	Tri2, mother	Pre+Postnatal	-0.000604322	-0.00266419	0.00145554	-4	0.553953	0.851959	primiparity;m_bmiincl;m_hbincl;ga_days_incl;GWG;w_age;m_heightincl;m_muacincl	FALSE
Prevotella.sp900552515	Tri2, mother	Pre+Postnatal	-0.00144013	-0.00633311	0.00345286	-4	0.552684	0.851959	primiparity;m_bmiincl;m_hbincl;ga_days_incl;GWG;w_age;m_heightincl;m_muacincl	FALSE
CAG.177.sp003514385	Tri2, mother	Pre+Postnatal	-0.000987536	-0.00294285	0.000967775	-4	0.31164	0.751571	m_bmiincl;m_hbincl;ga_days_incl;w_age;m_heightincl;m_muacincl	FALSE
Prevotella.sp900548745	Tri2, mother	Pre+Postnatal	0.00285164	-0.00377668	0.00947997	4	0.387382	0.783537	primiparity;m_bmiincl;m_hbincl;GWG;w_age;m_heightincl;m_muacincl	FALSE
Unknown_CAG.110	Tri2, mother	Pre+Postnatal	0.00214715	-0.00251551	0.00680982	4	0.354892	0.759007	primiparity;m_bmiincl;m_hbincl;ga_days_incl;GWG;w_age;m_heightincl;m_muacincl	FALSE
Proteus.mirabilis	Tri2, mother	Pre+Postnatal	0			0
Faecalibacterium.prausnitzii_H	Tri2, mother	Pre+Postnatal	-0.00403764	-0.0103681	0.00229282	-4	0.20341	0.73443	m_hbincl;ga_days_incl;GWG;w_age;m_heightincl;m_muacincl	FALSE
CAG.83.sp000435555	Tri2, mother	Pre+Postnatal	-0.000312581	-0.00903527	0.00841011	-4	0.942207	0.977569	primiparity;m_bmiincl;m_hbincl;ga_days_incl;GWG;w_age;m_heightincl;m_muacincl	FALSE
Unknown_Rothia	Tri2, mother	Pre+Postnatal	0			0
Dialister.sp900541605	Tri2, mother	Pre+Postnatal	0			0
Zag111.sp003258735	Tri2, mother	Pre+Postnatal	0.000363416	-0.00024305	0.000969882	4	0.23193	0.73443	primiparity;m_bmiincl;m_hbincl;GWG	FALSE
CAG.710.sp000432595	Tri2, mother	Pre+Postnatal	-0.000173268	-0.000413966	6.74292e-05	-4	0.152134	0.73443	primiparity;m_bmiincl;m_hbincl;ga_days_incl;GWG;w_age;m_heightincl;m_muacincl	FALSE
CAG.95.sp000436115	Tri2, mother	Pre+Postnatal	-0.000667517	-0.00318027	0.00184524	-4	0.592501	0.871672	primiparity;m_bmiincl;m_hbincl;GWG;w_age;m_muacincl	FALSE
Faecalibacterium.prausnitzii_G	Tri2, mother	Pre+Postnatal	-0.00298547	-0.00641304	0.000442106	-4	0.0856129	0.73443	primiparity;m_bmiincl;ga_days_incl;GWG;w_age;m_heightincl	FALSE
Ruminiclostridium_E.sp900556525	Tri2, mother	Pre+Postnatal	-0.00191478	-0.00381827	-1.13043e-05	-4	0.0487357	0.73443	primiparity;m_bmiincl;m_hbincl;ga_days_incl;GWG;w_age;m_heightincl;m_muacincl	TRUE
Agathobacter.rectalis	Tri2, mother	Pre+Postnatal	-0.00162057	-0.00626292	0.00302179	-4	0.481815	0.827496	primiparity;m_bmiincl;m_hbincl;ga_days_incl;GWG;w_age;m_heightincl;m_muacincl	FALSE
Ruminococcus_E.sp003438075	Tri2, mother	Pre+Postnatal	0.00213456	-0.00368374	0.00795287	4	0.461051	0.814039	primiparity;m_bmiincl;GWG;m_heightincl;m_muacincl	FALSE
Cetobacterium_A.somerae	Tri2, mother	Pre+Postnatal	0.000211321	-0.000764818	0.00118746	4	0.662201	0.892326	primiparity;m_bmiincl;m_hbincl;ga_days_incl;GWG;m_heightincl;m_muacincl	FALSE
Streptococcus.vestibularis	Tri2, mother	Pre+Postnatal	5.95817e-06	-2.09915e-05	3.29079e-05	1.09242	0.655795	0.890501	primiparity;m_bmiincl;m_hbincl;w_age;m_heightincl;m_muacincl	FALSE
Mesosutterella.massiliensis	Tri2, mother	Pre+Postnatal	0			0
ER4.sp900546295	Tri2, mother	Pre+Postnatal	-0.000659457	-0.00170499	0.000386078	-4	0.208582	0.73443	m_bmiincl;ga_days_incl;w_age;m_heightincl;m_muacincl	FALSE
Parasutterella.excrementihominis	Tri2, mother	Pre+Postnatal	1.55199e-05	-4.49285e-05	7.59684e-05	2.84556	0.604912	0.872968	primiparity;m_hbincl;ga_days_incl;GWG;w_age;m_muacincl	FALSE
Prevotella.sp900552965	Tri2, mother	Pre+Postnatal	-0.00147711	-0.0042174	0.00126318	-4	0.280073	0.751571	primiparity;m_bmiincl;m_hbincl;ga_days_incl;GWG;w_age;m_heightincl;m_muacincl	FALSE
Akkermansia.muciniphila_B	Tri2, mother	Pre+Postnatal	0			0
Dialister.sp900543165	Tri2, mother	Pre+Postnatal	-0.00233316	-0.00455371	-0.000112613	-4	0.0400239	0.73443	primiparity;m_bmiincl;ga_days_incl;m_heightincl;m_muacincl	TRUE
Erysipelatoclostridium.ramosum	Tri2, mother	Pre+Postnatal	0			0
Dialister.succinatiphilus	Tri2, mother	Pre+Postnatal	0.000504107	-0.00145933	0.00246755	4	0.604912	0.872968	primiparity;m_hbincl;ga_days_incl;GWG;w_age;m_muacincl	FALSE
CAG.302.sp001916775	Tri2, mother	Pre+Postnatal	-0.000199366	-0.000616731	0.000218	-4	0.3382	0.751571	primiparity;m_bmiincl;m_hbincl;GWG;w_age;m_muacincl	FALSE
UBA1724.sp900548225	Tri2, mother	Pre+Postnatal	-0.000719088	-0.00267526	0.00123708	-4	0.459825	0.814039	m_bmiincl;m_hbincl;ga_days_incl;w_age;m_heightincl;m_muacincl	FALSE
Limosilactobacillus.gastricus	Tri2, mother	Pre+Postnatal	0			0
Unknown_CAG.170	Tri2, mother	Pre+Postnatal	-0.00108876	-0.00623745	0.00405992	-4	0.669827	0.892326	primiparity;m_bmiincl;ga_days_incl;GWG;m_heightincl;m_muacincl	FALSE
CAG.170.sp002404795	Tri2, mother	Pre+Postnatal	0.000827391	-0.00223489	0.00388968	4	0.585549	0.871567	primiparity;m_bmiincl;m_hbincl;ga_days_incl;GWG;w_age;m_heightincl;m_muacincl	FALSE
WG.1.sp900539665	Tri2, mother	Pre+Postnatal	0.00675519	9.77593e-05	0.0134126	4	0.0469251	0.73443	primiparity;m_bmiincl;m_hbincl;ga_days_incl;GWG;w_age;m_heightincl;m_muacincl	TRUE
Unknown_Bacteroides	Tri2, mother	Pre+Postnatal	0.002013	-0.00285361	0.00687962	4	0.405735	0.803854	primiparity;m_bmiincl;m_hbincl;ga_days_incl;GWG;w_age;m_heightincl	FALSE
Olsenella_B.sp000752675	Tri2, mother	Pre+Postnatal	0			0
Bifidobacterium.kashiwanohense_A	Tri2, mother	Pre+Postnatal	0			0
Zag111.sp004558955	Tri2, mother	Pre+Postnatal	6.03406e-05	-0.000179077	0.000299759	4	0.61122	0.872968	primiparity;m_bmiincl;m_hbincl;ga_days_incl;GWG;w_age;m_muacincl	FALSE
Roseburia.sp900552665	Tri2, mother	Pre+Postnatal	0.000558972	-0.00120443	0.00232238	4	0.523444	0.842261	primiparity;m_bmiincl;ga_days_incl;w_age;m_heightincl;m_muacincl	FALSE
CAG.484.sp900321895	Tri2, mother	Pre+Postnatal	-0.0006018	-0.00154692	0.000343318	-4	0.203641	0.73443	primiparity;m_bmiincl;m_hbincl;ga_days_incl;GWG;w_age;m_heightincl;m_muacincl	FALSE
Agathobacter.faecis	Tri2, mother	Pre+Postnatal	-0.00183861	-0.00505903	0.00138182	-4	0.254291	0.748923	m_bmiincl;m_hbincl;w_age;m_muacincl	FALSE
Agathobacter.sp900543445	Tri2, mother	Pre+Postnatal	-0.000274588	-0.00200355	0.00145438	-4	0.748183	0.915227	primiparity;m_bmiincl;m_hbincl;ga_days_incl;GWG;w_age;m_heightincl;m_muacincl	FALSE
Ligilactobacillus.ruminis	Tri2, mother	Pre+Postnatal	0			0
Rs.D84.sp900546225	Tri2, mother	Pre+Postnatal	-1.91718e-05	-4.21867e-05	3.84312e-06	-3.51512	0.0997801	0.73443	m_bmiincl;m_hbincl;m_muacincl	FALSE
Haemophilus_A.parahaemolyticus	Tri2, mother	Pre+Postnatal	0			0
Eubacterium_R.sp900542875	Tri2, mother	Pre+Postnatal	-3.8552e-07	-0.00328978	0.00328901	-0.0706847	0.999811	0.999811	m_bmiincl;m_hbincl;GWG;w_age;m_heightincl;m_muacincl	FALSE
Megasphaera.massiliensis	Tri2, mother	Pre+Postnatal	0			0
Gemmiger.variabilis_A	Tri2, mother	Pre+Postnatal	0.00026182	-0.00155357	0.00207721	4	0.770608	0.920449	primiparity;m_bmiincl;m_hbincl;ga_days_incl;GWG;w_age;m_heightincl;m_muacincl	FALSE
Muribaculum.sp002492595	Tri2, mother	Pre+Postnatal	0.000551369	-0.00400575	0.00510849	4	0.807408	0.938259	primiparity;m_hbincl;GWG;w_age	FALSE
Unknown_UBA2883	Tri2, mother	Pre+Postnatal	0.000805516	-5.42069e-05	0.00166524	4	0.0653599	0.73443	primiparity;m_bmiincl;m_hbincl;w_age;m_heightincl;m_muacincl	FALSE
Phil1.sp004558525	Tri2, mother	Pre+Postnatal	0			0
Unknown_ER4	Tri2, mother	Pre+Postnatal	-0.000892419	-0.00421804	0.0024332	-4	0.588094	0.871631	primiparity;m_bmiincl;m_hbincl;ga_days_incl;GWG;w_age;m_heightincl;m_muacincl	FALSE
Prevotella.sp900556395	Tri2, mother	Pre+Postnatal	-0.000287366	-0.000820271	0.000245538	-4	0.280223	0.751571	m_bmiincl;m_hbincl;ga_days_incl;GWG;w_age;m_heightincl;m_muacincl	FALSE
Eubacterium.callanderi	Tri2, mother	Pre+Postnatal	0			0
Megasphaera_B.sp003467125	Tri2, mother	Pre+Postnatal	-0.00012982	-0.000461011	0.000201371	-4	0.430868	0.81213	primiparity;m_bmiincl;ga_days_incl;GWG;w_age;m_heightincl	FALSE
CAG.83.sp900554275	Tri2, mother	Pre+Postnatal	-0.00121198	-0.00649202	0.00406805	-4	0.642951	0.886539	primiparity;m_bmiincl;m_hbincl;ga_days_incl;GWG;w_age;m_heightincl;m_muacincl	FALSE
Prevotella.sp002251385	Tri2, mother	Pre+Postnatal	-0.000840429	-0.00424962	0.00256876	-4	0.618673	0.872968	primiparity;m_bmiincl;m_hbincl;ga_days_incl;GWG;w_age;m_heightincl;m_muacincl	FALSE
CAG.914.sp000437895	Tri2, mother	Pre+Postnatal	-0.000271056	-0.00163013	0.00108802	-4	0.686975	0.897899	primiparity;m_bmiincl;m_hbincl;ga_days_incl;GWG;w_age;m_heightincl;m_muacincl	FALSE
Unknown_Collinsella	Tri2, mother	Pre+Postnatal	4.09736e-06	-1.83657e-05	2.65605e-05	0.751246	0.712412	0.902872	primiparity;m_bmiincl;m_hbincl;ga_days_incl;GWG;w_age;m_heightincl;m_muacincl	FALSE
Bacteroides.intestinalis	Tri2, mother	Pre+Postnatal	0.00327325	-0.00143083	0.00797732	4	0.166424	0.73443	primiparity;m_bmiincl;m_hbincl;GWG;w_age	FALSE
CAG.110.sp900540635	Tri2, mother	Pre+Postnatal	-0.000828345	-0.00222778	0.000571087	-4	0.236479	0.735352	primiparity;m_bmiincl;m_hbincl;ga_days_incl;GWG;w_age;m_heightincl;m_muacincl	FALSE
Unknown_UBA737	Tri2, mother	Pre+Postnatal	0.000499549	-0.000391733	0.00139083	4	0.262916	0.748923	m_bmiincl;GWG;m_heightincl;m_muacincl	FALSE
Parabacteroides.gordonii	Tri2, mother	Pre+Postnatal	0			0
CAG.103.sp900317855	Tri2, mother	Pre+Postnatal	-0.000539984	-0.00116531	8.53421e-05	-4	0.0882193	0.73443	primiparity;m_bmiincl;m_hbincl;ga_days_incl;GWG;m_muacincl	FALSE
Faecalibacterium.sp900551435	Tri2, mother	Pre+Postnatal	-0.000758432	-0.00212943	0.000612568	-4	0.268502	0.751571	primiparity;m_bmiincl;ga_days_incl;GWG;w_age;m_heightincl	FALSE
Dialister.sp000434475	Tri2, mother	Pre+Postnatal	-0.00173789	-0.00392444	0.000448661	-4	0.115501	0.73443	primiparity;ga_days_incl;w_age;m_heightincl;m_muacincl	FALSE
Streptococcus.sp900543065	Tri2, mother	Pre+Postnatal	0			0
Helicobacter_D.pullorum	Tri2, mother	Pre+Postnatal	0			0
Butyricicoccus.pullicaecorum	Tri2, mother	Pre+Postnatal	0			0
Prevotella.sp900550035	Tri2, mother	Pre+Postnatal	-3.04645e-05	-0.000977268	0.000916339	-4	0.948099	0.977569	primiparity;m_bmiincl;m_hbincl;ga_days_incl;GWG;w_age;m_heightincl;m_muacincl	FALSE
Angelakisella.sp004557855	Tri2, mother	Pre+Postnatal	-0.0018587	-0.00677258	0.00305518	-4	0.446277	0.812306	primiparity;m_bmiincl;m_hbincl;ga_days_incl;GWG;w_age;m_heightincl;m_muacincl	FALSE
Bacteroides.eggerthii	Tri2, mother	Pre+Postnatal	0			0
Megasphaera.elsdenii	Tri2, mother	Pre+Postnatal	0			0
Unknown_UBA7057	Tri2, mother	Pre+Postnatal	-0.000458446	-0.00138802	0.000471128	-4	0.322639	0.751571	m_bmiincl;m_hbincl;ga_days_incl;GWG;w_age;m_heightincl;m_muacincl	FALSE
Unknown_Oribacterium	Tri2, mother	Pre+Postnatal	-6.66502e-05	-0.00171359	0.00158029	-4	0.93475	0.975467	primiparity;m_bmiincl;m_hbincl;ga_days_incl;GWG;w_age;m_heightincl;m_muacincl	FALSE
Unknown_Duodenibacillus	Tri2, mother	Pre+Postnatal	5.4313e-05	-5.1563e-05	0.000160189	4	0.304529	0.751571	primiparity;m_bmiincl;m_hbincl;GWG;w_age	FALSE
Olsenella_E.sp003609875	Tri2, mother	Pre+Postnatal	-0.000222693	-0.00055836	0.000112974	-4	0.186054	0.73443	primiparity;m_hbincl;ga_days_incl;GWG;w_age;m_heightincl;m_muacincl	FALSE	TRUE	FALSE	0.928571
RUG410.sp900553115	Tri2, mother	Pre+Postnatal	-0.000791231	-0.00225202	0.000669555	-4	0.279011	0.751571	primiparity;m_bmiincl;w_age;m_muacincl	FALSE
UBA3789.sp900543055	Tri2, mother	Pre+Postnatal	0.000334013	-0.000556977	0.001225	4	0.450698	0.812504	primiparity;m_bmiincl;m_hbincl;GWG;w_age;m_heightincl;m_muacincl	FALSE
UBA6398.sp003150315	Tri2, mother	Pre+Postnatal	-0.000974747	-0.00219408	0.00024459	-4	0.113137	0.73443	primiparity;m_bmiincl;m_hbincl;ga_days_incl;GWG;w_age;m_heightincl;m_muacincl	FALSE
CAG.568.sp000434395	Tri2, mother	Pre+Postnatal	-2.86394e-05	-0.000540916	0.000483637	-4	0.910131	0.968847	primiparity;m_bmiincl;ga_days_incl;GWG;w_age;m_heightincl	FALSE
Lachnospira.sp000436535	Tri2, mother	Pre+Postnatal	0.000171741	-0.00105955	0.00140303	4	0.778355	0.923998	primiparity;m_hbincl;ga_days_incl;GWG;m_heightincl;m_muacincl	FALSE
CAG.495.sp000432275	Tri2, mother	Pre+Postnatal	0.00248561	-0.00152616	0.00649737	4	0.216557	0.73443	primiparity;m_hbincl;GWG;w_age;m_heightincl	FALSE
UBA11524.sp000437595	Tri2, mother	Pre+Postnatal	0.00147648	8.83289e-05	0.00286462	4	0.037764	0.73443	primiparity;m_bmiincl;m_hbincl;w_age	TRUE
UBA2882.sp900549665	Tri2, mother	Pre+Postnatal	0.00103111	-0.000494885	0.00255711	4	0.178041	0.73443	primiparity;m_bmiincl;m_hbincl;ga_days_incl;GWG;w_age;m_heightincl;m_muacincl	FALSE
Phil1.sp001940855	Tri2, mother	Pre+Postnatal	-0.000148277	-0.00377982	0.00348327	-4	0.934169	0.975467	primiparity;m_bmiincl;m_hbincl;ga_days_incl;GWG;w_age;m_heightincl;m_muacincl	FALSE
CAG.83.sp900545495	Tri2, mother	Pre+Postnatal	-0.00244471	-0.00701053	0.00212111	-4	0.283234	0.751571	primiparity;m_bmiincl;m_hbincl;ga_days_incl;GWG;w_age;m_heightincl;m_muacincl	FALSE
UBA1436.sp900541355	Tri2, mother	Pre+Postnatal	-0.000122846	-0.00441627	0.00417058	-4	0.953887	0.980055	primiparity;m_bmiincl;m_hbincl;ga_days_incl;GWG;w_age;m_muacincl	FALSE
Mitsuokella.multacida	Tri2, mother	Pre+Postnatal	-0.000744484	-0.00400492	0.00251595	-4	0.644685	0.887876	primiparity;m_bmiincl;m_hbincl;ga_days_incl;GWG;w_age;m_heightincl;m_muacincl	FALSE
CAG.83.sp000435975	Tri2, mother	Pre+Postnatal	-0.000245116	-0.00178346	0.00129323	-4	0.747386	0.915227	primiparity;m_bmiincl;m_hbincl;ga_days_incl;GWG;w_age;m_heightincl;m_muacincl	FALSE
Parabacteroides.sp900549585	Tri2, mother	Pre+Postnatal	9.80391e-05	-0.0018938	0.00208988	4	0.920685	0.969759	primiparity;m_bmiincl;m_hbincl;ga_days_incl;GWG;w_age;m_heightincl;m_muacincl	FALSE
CAG.103.sp000432375	Tri2, mother	Pre+Postnatal	-0.000805867	-0.00172165	0.000109917	-4	0.082744	0.73443	GWG;m_heightincl;m_muacincl	FALSE
CAG.110.sp900554705	Tri2, mother	Pre+Postnatal	0.00078497	-0.000703254	0.00227319	4	0.291005	0.751571	primiparity;m_hbincl;GWG;w_age;m_heightincl;m_muacincl	FALSE
Enterobacter.cloacae_K	Tri2, mother	Pre+Postnatal	-0.000543802	-0.00183914	0.000751539	-4	0.398449	0.796212	primiparity;m_bmiincl;m_hbincl;ga_days_incl;GWG;w_age;m_heightincl;m_muacincl	FALSE
Klebsiella.variicola	Tri2, mother	Pre+Postnatal	-0.000438778	-0.0016306	0.000753045	-4	0.458399	0.814039	primiparity;m_bmiincl;m_hbincl;ga_days_incl;GWG;w_age;m_heightincl;m_muacincl	FALSE
CAG.465.sp000433755	Tri2, mother	Pre+Postnatal	-0.000152351	-0.00061224	0.000307539	-4	0.505014	0.841207	primiparity;m_bmiincl;m_hbincl;w_age;m_heightincl;m_muacincl	FALSE
Unknown_UBA636	Tri2, mother	Pre+Postnatal	0.000364704	-0.000358783	0.00108819	4	0.312862	0.751571	primiparity;m_bmiincl;GWG;w_age;m_muacincl	FALSE
CAG.83.sp900549395	Tri2, mother	Pre+Postnatal	-0.00131003	-0.00259651	-2.35446e-05	-4	0.0461729	0.73443	primiparity;m_bmiincl;w_age;m_heightincl;m_muacincl	TRUE
Alistipes.shahii	Tri2, mother	Pre+Postnatal	-0.000885286	-0.00332779	0.00155722	-4	0.466084	0.81657	primiparity;m_bmiincl;ga_days_incl;w_age;m_heightincl;m_muacincl	FALSE
Butyrivibrio_A.sp000431815	Tri2, mother	Pre+Postnatal	-0.000384285	-0.00162463	0.000856059	-4	0.532467	0.848416	primiparity;m_bmiincl;ga_days_incl;GWG;w_age;m_heightincl;m_muacincl	FALSE
CAG.103.sp900543625	Tri2, mother	Pre+Postnatal	0.000318708	-0.00141662	0.00205403	4	0.711049	0.902872	primiparity;m_bmiincl;m_hbincl;ga_days_incl;GWG;w_age	FALSE
Unknown_CAG.877	Tri2, mother	Pre+Postnatal	-0.000142805	-0.000728654	0.000443044	-4	0.623233	0.873478	primiparity;m_bmiincl;m_hbincl;ga_days_incl;m_heightincl;m_muacincl	FALSE
Unknown_CAG.83	Tri2, mother	Pre+Postnatal	-0.00143028	-0.00523557	0.00237501	-4	0.449882	0.812306	primiparity;m_bmiincl;m_hbincl;GWG;w_age;m_heightincl	FALSE
Unknown_Gemmiger	Tri2, mother	Pre+Postnatal	0.00058791	-0.000127436	0.00130326	4	0.103867	0.73443	primiparity;m_bmiincl;m_hbincl;GWG;w_age;m_heightincl;m_muacincl	FALSE
Dysgonomonas.sp900079735	Tri2, mother	Pre+Postnatal	0			0
Bifidobacterium.pseudocatenulatum	Tri2, mother	Pre+Postnatal	0			0
Agathobacter.sp900546625	Tri2, mother	Pre+Postnatal	0.000371664	-0.00209793	0.00284126	4	0.761588	0.915325	primiparity;m_bmiincl;w_age;m_heightincl;m_muacincl	FALSE
CAG.83.sp900555735	Tri2, mother	Pre+Postnatal	-0.000667441	-0.00506922	0.00373434	-4	0.759647	0.915227	primiparity;m_bmiincl;m_hbincl;ga_days_incl;w_age;m_muacincl	FALSE
Alistipes.sp900546065	Tri2, mother	Pre+Postnatal	-0.000895824	-0.00230934	0.000517694	-4	0.20689	0.73443	m_bmiincl;m_hbincl;w_age	FALSE
Acetatifactor.sp900554205	Tri2, mother	Pre+Postnatal	-2.31825e-05	-0.00165056	0.00160419	-4	0.977008	0.990704	primiparity;m_bmiincl;m_hbincl;ga_days_incl;GWG;w_age;m_heightincl;m_muacincl	FALSE
Veillonella.parvula	Tri2, mother	Pre+Postnatal	0			0
Alistipes.finegoldii	Tri2, mother	Pre+Postnatal	0.000185197	-8.08615e-05	0.000451256	4	0.16628	0.73443	primiparity;m_bmiincl;ga_days_incl;GWG;w_age	FALSE
UBA1777.sp900549865	Tri2, mother	Pre+Postnatal	1.35763e-05	-0.000940273	0.000967426	2.4892	0.977051	0.990704	primiparity;m_bmiincl;m_hbincl;ga_days_incl;GWG;w_age;m_muacincl	FALSE
CAG.177.sp003538135	Tri2, mother	Pre+Postnatal	-0.00119129	-0.00339107	0.00100848	-4	0.277874	0.751571	primiparity;m_bmiincl;m_hbincl;ga_days_incl;GWG;w_age;m_heightincl;m_muacincl	FALSE
CAG.273.sp000437855	Tri2, mother	Pre+Postnatal	0.000614617	-0.000955903	0.00218514	4	0.430852	0.81213	primiparity;m_bmiincl;m_hbincl;ga_days_incl;GWG;w_age;m_heightincl;m_muacincl	FALSE
Ruminococcus_E.sp900314705	Tri2, mother	Pre+Postnatal	0.000159596	-0.00143229	0.00175149	4	0.839479	0.942601	primiparity;m_bmiincl;m_hbincl;ga_days_incl;GWG;w_age;m_muacincl	FALSE
Porphyromonas.uenonis_A	Tri2, mother	Pre+Postnatal	0			0
Haemophilus_D.parainfluenzae_M	Tri2, mother	Pre+Postnatal	0			0
F23.B02.sp003533405	Tri2, mother	Pre+Postnatal	-0.000411315	-0.00152956	0.000706925	-4	0.458802	0.814039	primiparity;m_bmiincl;m_hbincl;ga_days_incl;GWG;w_age;m_heightincl;m_muacincl	FALSE
Bifidobacterium.dentium	Tri2, mother	Pre+Postnatal	0			0
Phocaeicola.massiliensis	Tri2, mother	Pre+Postnatal	0.00101507	-0.000623249	0.00265338	4	0.216557	0.73443	primiparity;m_hbincl;GWG;w_age;m_heightincl	FALSE
UBA1232.sp900544815	Tri2, mother	Pre+Postnatal	0.00027581	-0.000415438	0.000967059	4	0.423402	0.81213	primiparity;m_hbincl;w_age;m_muacincl	FALSE
CAG.177.sp000431775	Tri2, mother	Pre+Postnatal	-3.95267e-05	-0.00319242	0.00311337	-4	0.979765	0.991242	primiparity;m_bmiincl;m_hbincl;ga_days_incl;GWG;w_age;m_heightincl;m_muacincl	FALSE
Dialister.invisus	Tri2, mother	Pre+Postnatal	0			0
Unknown_CAG.460	Tri2, mother	Pre+Postnatal	0.000714435	-0.00046013	0.001889	4	0.224885	0.73443	primiparity;m_hbincl;GWG;w_age;m_heightincl	FALSE
Rs.D84.sp900549365	Tri2, mother	Pre+Postnatal	-0.000794151	-0.00294184	0.00135353	-4	0.456836	0.814039	m_bmiincl;m_hbincl;ga_days_incl;GWG;w_age;m_heightincl;m_muacincl	FALSE
RC9.sp900545245	Tri2, mother	Pre+Postnatal	0.000394307	-0.000651333	0.00143995	4	0.447659	0.812306	primiparity;m_bmiincl;m_hbincl;ga_days_incl;GWG;w_age;m_heightincl;m_muacincl	FALSE
CAG.510.sp000434615	Tri2, mother	Pre+Postnatal	-0.000468168	-0.00191287	0.000976535	-4	0.513545	0.842261	primiparity;m_bmiincl;m_hbincl;ga_days_incl;GWG;w_age;m_heightincl;m_muacincl	FALSE
CAG.353.sp900066885	Tri2, mother	Pre+Postnatal	-0.000423135	-0.00136024	0.000513973	-4	0.364589	0.768075	primiparity;m_bmiincl;ga_days_incl;GWG;w_age;m_heightincl;m_muacincl	FALSE
Unknown_CAG.103	Tri2, mother	Pre+Postnatal	0.000319621	-0.00232252	0.00296176	4	0.806751	0.938259	primiparity;m_bmiincl;m_hbincl;ga_days_incl;GWG;w_age;m_heightincl;m_muacincl	FALSE
Prevotellamassilia.sp900542795	Tri2, mother	Pre+Postnatal	-0.00198908	-0.00527248	0.00129433	-4	0.226202	0.73443	primiparity;m_bmiincl;m_hbincl;ga_days_incl;GWG;w_age;m_muacincl	FALSE
CAG.83.sp003539495	Tri2, mother	Pre+Postnatal	-0.000661804	-0.00157663	0.000253027	-4	0.150185	0.73443	primiparity;m_bmiincl;m_hbincl;ga_days_incl;GWG;w_age;m_heightincl;m_muacincl	FALSE
RF16.sp900556095	Tri2, mother	Pre+Postnatal	-0.000630611	-0.00193825	0.000677024	-4	0.333657	0.751571	m_bmiincl;m_hbincl;ga_days_incl;GWG;w_age;m_muacincl	FALSE
UBA4644.sp900555855	Tri2, mother	Pre+Postnatal	-0.00189808	-0.00458341	0.000787254	-4	0.159444	0.73443	primiparity;m_bmiincl;m_hbincl;ga_days_incl;GWG;w_age;m_heightincl;m_muacincl	FALSE
F082.sp002633315	Tri2, mother	Pre+Postnatal	-6.59972e-05	-0.000174224	4.22297e-05	-4	0.224402	0.73443	m_bmiincl;m_muacincl	FALSE
Haemophilus.sp002998595	Tri2, mother	Pre+Postnatal	0			0
Dialister.sp900343095	Tri2, mother	Pre+Postnatal	0			0
RUG841.sp900313795	Tri2, mother	Pre+Postnatal	0.000100779	-0.000554758	0.000756316	4	0.756201	0.915227	primiparity;m_bmiincl;m_hbincl;GWG;w_age;m_heightincl;m_muacincl	FALSE
Unknown_UMGS902	Tri2, mother	Pre+Postnatal	-0.00192289	-0.0048908	0.00104501	-4	0.196041	0.73443	primiparity;m_bmiincl;m_hbincl;ga_days_incl;GWG;w_age;m_heightincl;m_muacincl	FALSE
Anaerotignum.lactatifermentans	Tri2, mother	Pre+Postnatal	6.9221e-05	-4.25016e-05	0.000180944	4	0.216557	0.73443	primiparity;m_hbincl;GWG;w_age;m_heightincl	FALSE
CAG.170.sp000436735	Tri2, mother	Pre+Postnatal	0.000275724	-0.000794471	0.00134592	4	0.604246	0.872968	m_bmiincl;GWG;m_heightincl;m_muacincl	FALSE
CAG.390.sp000437015	Tri2, mother	Pre+Postnatal	-0.00125048	-0.00284439	0.000343438	-4	0.120224	0.73443	m_bmiincl;m_hbincl;GWG;m_muacincl	FALSE
Phascolarctobacterium_A.succinatutens	Tri2, mother	Pre+Postnatal	0.00159572	-0.000675841	0.00386729	4	0.161948	0.73443	primiparity;m_bmiincl;m_hbincl;ga_days_incl;GWG;w_age;m_heightincl;m_muacincl	FALSE
PeH17.sp000435055	Tri2, mother	Pre+Postnatal	-0.000851161	-0.00309768	0.00139536	-4	0.445924	0.812306	primiparity;m_bmiincl;m_hbincl;ga_days_incl;w_age;m_heightincl;m_muacincl	FALSE
Prevotella.sp000834015	Tri2, mother	Pre+Postnatal	0.00184564	-0.000790626	0.00448191	4	0.163915	0.73443	primiparity;m_hbincl;GWG;w_age;m_heightincl	FALSE
Unknown_RUG841	Tri2, mother	Pre+Postnatal	-0.00133698	-0.0042582	0.00158423	-4	0.358181	0.76325	m_bmiincl;m_hbincl;ga_days_incl;GWG;w_age;m_heightincl;m_muacincl	FALSE
CAG.793.sp000433915	Tri2, mother	Pre+Postnatal	-0.000212538	-0.00059269	0.000167614	-4	0.263818	0.748923	primiparity;m_hbincl;ga_days_incl;w_age;m_muacincl	FALSE
Unknown_UBA2903	Tri2, mother	Pre+Postnatal	-3.79223e-05	-0.000205361	0.000129517	-4	0.647366	0.888406	primiparity;m_bmiincl;m_hbincl;ga_days_incl;GWG;w_age;m_heightincl;m_muacincl	FALSE
Gemmiger.qucibialis	Tri2, mother	Pre+Postnatal	-0.000150315	-0.00121525	0.00091462	-4	0.775358	0.923272	primiparity;m_bmiincl;m_hbincl;ga_days_incl;GWG;w_age;m_heightincl;m_muacincl	FALSE
Acidaminococcus.massiliensis	Tri2, mother	Pre+Postnatal	0			0
DTU089_A.sp002440045	Tri2, mother	Pre+Postnatal	0.000259292	-0.00117208	0.00169067	4	0.715273	0.902872	primiparity;m_hbincl;GWG;w_age	FALSE
ER4.sp900556145	Tri2, mother	Pre+Postnatal	0.000629935	-0.00188729	0.00314716	4	0.614045	0.872968	m_bmiincl;ga_days_incl;GWG;w_age;m_heightincl;m_muacincl	FALSE
Unknown_CAG.465_1	Tri2, mother	Pre+Postnatal	0.000558625	-0.000328174	0.00144542	4	0.208911	0.73443	primiparity;m_bmiincl;m_hbincl;GWG;w_age;m_muacincl	FALSE
CAG.488.sp003486665	Tri2, mother	Pre+Postnatal	-3.28638e-05	-0.000140248	7.45206e-05	-4	0.537083	0.849527	primiparity;m_bmiincl;m_hbincl;ga_days_incl;GWG;w_age;m_heightincl;m_muacincl	FALSE
Angelakisella.sp900547385	Tri2, mother	Pre+Postnatal	-0.00247605	-0.00572913	0.000777035	-4	0.131028	0.73443	primiparity;m_bmiincl;m_hbincl;GWG;w_age;m_muacincl	FALSE
Oscillibacter.sp001916835	Tri2, mother	Pre+Postnatal	0.000617768	-0.00256983	0.00380537	4	0.695355	0.902872	primiparity;m_bmiincl;m_hbincl;ga_days_incl;GWG;w_age;m_heightincl;m_muacincl	FALSE
CAG.83.sp001916855	Tri2, mother	Pre+Postnatal	-2.28186e-06	-0.000940546	0.000935982	-0.418375	0.996082	0.999526	primiparity;m_bmiincl;m_hbincl;ga_days_incl;GWG;w_age	FALSE
Alistipes.putredinis	Tri2, mother	Pre+Postnatal	1.95413e-05	-0.00030593	0.000345013	3.58288	0.903519	0.967686	primiparity;m_hbincl;ga_days_incl;GWG;w_age;m_muacincl	FALSE
CAG.632.sp900539185	Tri2, mother	Pre+Postnatal	0.000223478	-3.91795e-05	0.000486134	4	0.0927871	0.73443	primiparity;m_bmiincl;m_hbincl;GWG;w_age;m_muacincl	FALSE
CAG.110.sp000434635	Tri2, mother	Pre+Postnatal	0.000310336	-0.000547373	0.00116804	4	0.466103	0.81657	primiparity;m_bmiincl;m_hbincl;ga_days_incl;GWG;w_age;m_heightincl;m_muacincl	FALSE
Unknown_Roseburia	Tri2, mother	Pre+Postnatal	-0.000205115	-0.00129186	0.000881634	-4	0.70291	0.902872	primiparity;m_bmiincl;m_hbincl;ga_days_incl;GWG;w_age;m_heightincl;m_muacincl	FALSE
Dysgonomonas.mossii	Tri2, mother	Pre+Postnatal	0			0
Ureaplasma.sp900544585	Tri2, mother	Pre+Postnatal	3.96434e-05	-2.4341e-05	0.000103628	4	0.216557	0.73443	primiparity;m_hbincl;GWG;w_age;m_heightincl	FALSE
Bifidobacterium.sp002742445	Tri2, mother	Pre+Postnatal	0			0
CAG.83.sp900552725	Tri2, mother	Pre+Postnatal	-0.00159168	-0.00426226	0.00107891	-4	0.233625	0.73443	primiparity;m_bmiincl;ga_days_incl;GWG;w_age;m_heightincl;m_muacincl	FALSE
CAG.81.sp900066535	Tri2, mother	Pre+Postnatal	0			0
Lachnospira.rogosae	Tri2, mother	Pre+Postnatal	-7.67984e-05	-0.000455333	0.000301736	-4	0.682172	0.896089	primiparity;m_bmiincl;m_hbincl;ga_days_incl;GWG;w_age;m_heightincl	FALSE
CAG.83.sp900551355	Tri2, mother	Pre+Postnatal	-0.000661929	-0.00180647	0.000482615	-4	0.247761	0.743284	primiparity;m_hbincl;ga_days_incl;GWG;w_age;m_heightincl	FALSE
Phascolarctobacterium_A.sp900551335	Tri2, mother	Pre+Postnatal	0.00278381	4.16717e-05	0.00552594	4	0.0468208	0.73443	primiparity;m_bmiincl;m_hbincl;ga_days_incl;GWG;w_age;m_heightincl;m_muacincl	TRUE
Unknown_CAG.488	Tri2, mother	Pre+Postnatal	-0.00119187	-0.00435226	0.00196852	-4	0.447621	0.812306	primiparity;m_bmiincl;m_hbincl;ga_days_incl;GWG;w_age;m_heightincl;m_muacincl	FALSE
Prevotella.melaninogenica	Tri2, mother	Pre+Postnatal	0			0
Faecalibacterium.prausnitzii_C	Tri2, mother	Pre+Postnatal	-0.00112127	-0.00374815	0.0015056	-4	0.390686	0.787477	primiparity;m_bmiincl;m_hbincl;ga_days_incl;GWG;w_age;m_heightincl;m_muacincl	FALSE
Unknown_UMGS1883_2	Tri2, mother	Pre+Postnatal	-0.00018555	-0.000731898	0.000360798	-4	0.493681	0.834743	primiparity;m_bmiincl;m_hbincl;ga_days_incl;GWG;w_age;m_heightincl;m_muacincl	FALSE
Unknown_Eubacterium_R	Tri2, mother	Pre+Postnatal	-0.000237109	-0.00175821	0.00128399	-4	0.752678	0.915227	primiparity;m_bmiincl;m_hbincl;ga_days_incl;GWG;w_age;m_heightincl;m_muacincl	FALSE
Ligilactobacillus.salivarius	Tri2, mother	Pre+Postnatal	0			0
UBA6382.sp900557555	Tri2, mother	Pre+Postnatal	0.00185725	6.2324e-05	0.00365217	4	0.0429853	0.73443	primiparity;m_bmiincl;m_hbincl;ga_days_incl;w_age;m_heightincl;m_muacincl	TRUE
UMGS1781.sp900554635	Tri2, mother	Pre+Postnatal	3.52806e-05	-0.000573283	0.000643845	4	0.906736	0.967758	primiparity;m_bmiincl;m_hbincl;GWG;w_age;m_heightincl;m_muacincl	FALSE
Barnesiella.intestinihominis	Tri2, mother	Pre+Postnatal	2.16643e-05	-0.000778537	0.000821866	3.97211	0.95632	0.981283	primiparity;m_bmiincl;m_hbincl;ga_days_incl;GWG;w_age;m_heightincl;m_muacincl	FALSE
CAG.194.sp000432915	Tri2, mother	Pre+Postnatal	-0.000626062	-0.00156692	0.000314795	-4	0.185	0.73443	primiparity;m_bmiincl;m_hbincl;ga_days_incl;GWG;m_muacincl	FALSE
CAG.417.sp000432835	Tri2, mother	Pre+Postnatal	-3.30831e-05	-0.00050055	0.000434384	-4	0.886168	0.962592	primiparity;m_bmiincl;m_hbincl;ga_days_incl;GWG;w_age;m_heightincl;m_muacincl	FALSE
Eubacterium_R.sp003526845	Tri2, mother	Pre+Postnatal	-0.000226833	-0.000705837	0.00025217	-4	0.342657	0.751571	primiparity;GWG;w_age;m_heightincl;m_muacincl	FALSE
UBA5809.sp002417965	Tri2, mother	Pre+Postnatal	0			0
Rs.D84.sp900550565	Tri2, mother	Pre+Postnatal	-0.000929563	-0.0022385	0.000379372	-4	0.158427	0.73443	m_hbincl;ga_days_incl;GWG	FALSE
RC9.sp000434935	Tri2, mother	Pre+Postnatal	0.00128721	0.00012383	0.00245059	4	0.0312287	0.73443	primiparity;m_bmiincl;m_hbincl;ga_days_incl;GWG;w_age;m_heightincl;m_muacincl	TRUE
Unknown_CAG.1000_1	Tri2, mother	Pre+Postnatal	-5.23491e-05	-0.0014272	0.0013225	-4	0.93872	0.976572	primiparity;m_bmiincl;ga_days_incl;w_age;m_heightincl;m_muacincl	FALSE
CAG.170.sp000432135	Tri2, mother	Pre+Postnatal	0.00170871	-0.000503278	0.0039207	4	0.125708	0.73443	primiparity;m_bmiincl;m_hbincl;GWG;w_age	FALSE
Veillonella.sp900550455	Tri2, mother	Pre+Postnatal	1.66568e-05	-4.92547e-05	8.25683e-05	3.054	0.610573	0.872968	primiparity;m_bmiincl;m_hbincl;GWG;w_age;m_heightincl	FALSE
Parabacteroides.sp900541965	Tri2, mother	Pre+Postnatal	0			0
Butyrivibrio_A.crossotus	Tri2, mother	Pre+Postnatal	0.00128857	-0.00126869	0.00384583	4	0.31205	0.751571	primiparity;m_bmiincl;m_hbincl;ga_days_incl;GWG;w_age;m_heightincl;m_muacincl	FALSE
Bifidobacterium.catenulatum	Tri2, mother	Pre+Postnatal	0			0
CAG.1138.sp000434675	Tri2, mother	Pre+Postnatal	0.000102477	-3.94276e-05	0.000244381	4	0.151405	0.73443	primiparity;m_bmiincl;m_hbincl;m_heightincl;m_muacincl	FALSE
CAG.303.sp900539455	Tri2, mother	Pre+Postnatal	8.47708e-05	-0.000110827	0.000280369	4	0.384292	0.779339	primiparity;m_bmiincl;m_hbincl;ga_days_incl;GWG;m_muacincl	FALSE
CAG.349.sp003539515	Tri2, mother	Pre+Postnatal	-0.000134299	-0.00205215	0.00178356	-4	0.887358	0.962592	primiparity;m_bmiincl;m_hbincl;ga_days_incl;GWG;w_age;m_heightincl;m_muacincl	FALSE
Angelakisella.sp900552845	Tri2, mother	Pre+Postnatal	-0.000112116	-0.00188675	0.00166252	-4	0.898506	0.966047	m_hbincl;ga_days_incl;GWG;w_age;m_heightincl;m_muacincl	FALSE
Desulfovibrio.piger	Tri2, mother	Pre+Postnatal	0.0010814	-0.000584868	0.00274767	4	0.195554	0.73443	primiparity;m_bmiincl;m_hbincl;ga_days_incl;GWG;w_age;m_muacincl	FALSE
Megamonas.funiformis	Tri2, mother	Pre+Postnatal	0			0
CAG.594.sp000434835	Tri2, mother	Pre+Postnatal	-2.01039e-05	-0.000272833	0.000232625	-3.68603	0.872299	0.955994	primiparity;m_bmiincl;m_hbincl;ga_days_incl;w_age;m_heightincl;m_muacincl	FALSE
Prevotella.sp900553595	Tri2, mother	Pre+Postnatal	0.000367438	-0.00120764	0.00194252	4	0.637566	0.883311	primiparity;m_bmiincl;m_hbincl;ga_days_incl;GWG;w_age;m_heightincl;m_muacincl	FALSE
ER4.sp003522105	Tri2, mother	Pre+Postnatal	-0.000232579	-0.00227581	0.00181065	-4	0.817943	0.938259	primiparity;m_bmiincl;m_hbincl;ga_days_incl;GWG;w_age;m_heightincl;m_muacincl	FALSE
Gemmiger.sp900539695	Tri2, mother	Pre+Postnatal	0.000231503	-0.000898858	0.00136186	4	0.679612	0.896089	primiparity;m_bmiincl;ga_days_incl;w_age;m_heightincl;m_muacincl	FALSE
Unknown_SFHR01	Tri2, mother	Pre+Postnatal	0.00148298	-0.00100951	0.00397547	4	0.234689	0.73443	primiparity;m_bmiincl;m_hbincl;GWG;w_age;m_muacincl	FALSE
CAG.1024.sp000432015	Tri2, mother	Pre+Postnatal	-0.000114162	-0.00204398	0.00181566	-4	0.904841	0.967686	primiparity;m_bmiincl;m_hbincl;ga_days_incl;GWG;w_age;m_muacincl	FALSE
CAG.83.sp900548615	Tri2, mother	Pre+Postnatal	-0.0001817	-0.00113351	0.000770105	-4	0.699961	0.902872	primiparity;m_bmiincl;m_hbincl;ga_days_incl;GWG;m_heightincl;m_muacincl	FALSE
UBA738.sp003522945	Tri2, mother	Pre+Postnatal	0.000635429	-0.000756846	0.0020277	4	0.359136	0.763658	primiparity;m_bmiincl;m_hbincl;ga_days_incl;GWG;w_age;m_heightincl;m_muacincl	FALSE
Eubacterium_R.sp900539325	Tri2, mother	Pre+Postnatal	-0.000634857	-0.0011249	-0.000144816	-4	0.012693	0.73443	primiparity;m_bmiincl;m_hbincl;ga_days_incl;w_age;m_muacincl	TRUE
CAG.83.sp900547745	Tri2, mother	Pre+Postnatal	0.00029179	0.000102547	0.000481032	4	0.00354642	0.73443	primiparity;m_bmiincl;GWG;w_age;m_muacincl	TRUE
UBA1081.sp900543395	Tri2, mother	Pre+Postnatal	-0.000163313	-0.000714152	0.000387527	-4	0.549796	0.851959	primiparity;m_bmiincl;m_hbincl;ga_days_incl;GWG;w_age;m_heightincl;m_muacincl	FALSE
RC9.sp900546925	Tri2, mother	Pre+Postnatal	0.000712853	-3.98034e-05	0.00146551	4	0.0626128	0.73443	primiparity;m_bmiincl;m_hbincl;ga_days_incl;GWG;w_age;m_muacincl	FALSE
UMGS1387.sp900551295	Tri2, mother	Pre+Postnatal	-5.70176e-05	-0.000283605	0.00016957	-4	0.61144	0.872968	primiparity;m_bmiincl;m_hbincl;ga_days_incl;GWG;w_age;m_heightincl;m_muacincl	FALSE
UBA1777.sp900547315	Tri2, mother	Pre+Postnatal	-0.000218271	-0.000908051	0.000471509	-4	0.523433	0.842261	primiparity;m_bmiincl;m_hbincl;ga_days_incl;GWG;w_age;m_heightincl;m_muacincl	FALSE
CAG.488.sp900539465	Tri2, mother	Pre+Postnatal	-0.000766563	-0.00210368	0.00057055	-4	0.251216	0.748923	primiparity;m_bmiincl;m_hbincl;ga_days_incl;GWG;w_age;m_heightincl;m_muacincl	FALSE
Bacteroides.congonensis	Tri2, mother	Pre+Postnatal	0.000241949	-0.00011532	0.000599219	4	0.177735	0.73443	primiparity;m_bmiincl;m_hbincl;w_age;m_muacincl	FALSE
CAG.83.sp900551995	Tri2, mother	Pre+Postnatal	0.00106522	-0.000430317	0.00256077	4	0.156742	0.73443	primiparity;m_bmiincl;m_hbincl;GWG;m_heightincl;m_muacincl	FALSE
Megasphaera.sp002319965	Tri2, mother	Pre+Postnatal	0			0
RC9.sp900546445	Tri2, mother	Pre+Postnatal	0.000879537	-0.000749198	0.00250827	4	0.280162	0.751571	primiparity;m_bmiincl;GWG;w_age;m_muacincl	FALSE
Unknown_UBA1777	Tri2, mother	Pre+Postnatal	-0.000101085	-0.00169458	0.00149241	-4	0.897997	0.966047	primiparity;m_bmiincl;m_hbincl;ga_days_incl;GWG;w_age;m_muacincl	FALSE
CAG.217.sp000436335	Tri2, mother	Pre+Postnatal	-0.000769721	-0.00154171	2.27203e-06	-4	0.0506396	0.73443	primiparity;ga_days_incl;GWG;w_age;m_heightincl;m_muacincl	FALSE
Faecalibacterium.prausnitzii_D	Tri2, mother	Pre+Postnatal	-0.000983529	-0.00172741	-0.000239649	-4	0.0110772	0.73443	m_bmiincl;GWG;w_age;m_heightincl;m_muacincl	TRUE
UBA1436.sp900540405	Tri2, mother	Pre+Postnatal	0.000633956	-0.00128987	0.00255778	4	0.507248	0.841307	primiparity;m_bmiincl;m_hbincl;ga_days_incl;w_age;m_muacincl	FALSE
CAG.448.sp003150135	Tri2, mother	Pre+Postnatal	0.000160567	-0.000344005	0.000665138	4	0.521832	0.842261	primiparity;m_bmiincl;m_hbincl;ga_days_incl;w_age;m_muacincl	FALSE
ER4.sp900550165	Tri2, mother	Pre+Postnatal	8.69865e-05	-0.000476458	0.000650432	4	0.755426	0.915227	primiparity;m_hbincl;ga_days_incl;GWG;w_age;m_heightincl	FALSE
Unknown_UBA1234_1	Tri2, mother	Pre+Postnatal	0.000310063	-0.000223335	0.00084346	4	0.245109	0.743284	primiparity;m_bmiincl;m_hbincl;GWG;w_age;m_heightincl;m_muacincl	FALSE
Roseburia.sp900542495	Tri2, mother	Pre+Postnatal	-0.000134423	-0.000711835	0.000442989	-4	0.638574	0.883653	primiparity;m_bmiincl;m_hbincl;ga_days_incl;w_age;m_heightincl;m_muacincl	FALSE
Unknown_UMGS1124	Tri2, mother	Pre+Postnatal	-6.86797e-05	-0.000959096	0.000821737	-4	0.876143	0.957064	primiparity;m_bmiincl;m_hbincl;GWG;w_age;m_heightincl;m_muacincl	FALSE
ER4.sp900552015	Tri2, mother	Pre+Postnatal	5.70641e-05	-0.000592029	0.000706157	4	0.85914	0.948157	primiparity;m_bmiincl;ga_days_incl;w_age;m_heightincl;m_muacincl	FALSE
Faecalibacterium.prausnitzii_A	Tri2, mother	Pre+Postnatal	-0.000766265	-0.00121149	-0.000321035	-4	0.00134986	0.73443	primiparity;m_bmiincl;m_hbincl;ga_days_incl;m_heightincl;m_muacincl	TRUE
RUG806.sp900313475	Tri2, mother	Pre+Postnatal	-0.000112968	-0.000321386	9.54508e-05	-4	0.277798	0.751571	primiparity;m_bmiincl;m_hbincl;ga_days_incl;w_age;m_heightincl;m_muacincl	FALSE
Unknown_CAG.390	Tri2, mother	Pre+Postnatal	-0.000525108	-0.00207057	0.00102035	-4	0.494226	0.834743	primiparity;m_bmiincl;m_hbincl;GWG;m_heightincl;m_muacincl	FALSE
Unknown_Phascolarctobacterium_A	Tri2, mother	Pre+Postnatal	0.00249123	5.08934e-05	0.00493156	4	0.0456464	0.73443	primiparity;m_bmiincl;m_muacincl	TRUE
Agathobacter.sp900317585	Tri2, mother	Pre+Postnatal	-0.000659784	-0.00248396	0.00116439	-4	0.466263	0.81657	primiparity;m_bmiincl;m_hbincl;ga_days_incl;GWG;w_age;m_heightincl;m_muacincl	FALSE
Bifidobacterium.adolescentis	Tri2, mother	Pre+Postnatal	2.84949e-06	-2.28924e-05	2.85914e-05	0.52245	0.823502	0.938259	primiparity;m_hbincl;GWG;w_age	FALSE
CAG.1000.sp000434555	Tri2, mother	Pre+Postnatal	-3.78913e-06	-0.000120435	0.000112856	-0.694732	0.947603	0.977569	primiparity;m_bmiincl;m_hbincl;ga_days_incl;GWG;w_age;m_heightincl;m_muacincl	FALSE
Unknown_Oscillibacter	Tri2, mother	Pre+Postnatal	0.000689881	-0.00109323	0.00247299	4	0.436058	0.81213	primiparity;m_bmiincl;m_hbincl;ga_days_incl;GWG;w_age;m_heightincl;m_muacincl	FALSE
Unknown_CAG.495	Tri2, mother	Pre+Postnatal	0.000156981	2.02069e-05	0.000293756	4	0.0256967	0.73443	primiparity;m_hbincl;w_age;m_muacincl	TRUE
Unknown_Sutterella	Tri2, mother	Pre+Postnatal	0.000565815	-0.000360368	0.001492	4	0.222911	0.73443	primiparity;m_bmiincl;GWG;m_heightincl;m_muacincl	FALSE
Eggerthella.lenta	Tri2, mother	Pre+Postnatal	0			0
CAG.510.sp900550475	Tri2, mother	Pre+Postnatal	0.000632729	-0.000531308	0.00179676	4	0.276772	0.751571	primiparity;m_hbincl;GWG;w_age;m_heightincl;m_muacincl	FALSE
Unknown_SFMI01	Tri2, mother	Pre+Postnatal	0.000599416	-0.000775708	0.00197454	4	0.381581	0.775858	primiparity;m_bmiincl;m_hbincl;GWG;w_age;m_muacincl	FALSE
CAG.632.sp002406015	Tri2, mother	Pre+Postnatal	8.42025e-06	-0.00161421	0.00163105	1.54384	0.991624	0.996775	primiparity;m_bmiincl;m_hbincl;ga_days_incl;GWG;w_age;m_heightincl;m_muacincl	FALSE
Alistipes_A.sp900539755	Tri2, mother	Pre+Postnatal	0.00126354	-0.000847475	0.00337456	4	0.231954	0.73443	primiparity;m_bmiincl;m_hbincl;ga_days_incl;GWG;w_age	FALSE
Unknown_RUG563	Tri2, mother	Pre+Postnatal	0.000994235	-0.000111837	0.00210031	4	0.0765262	0.73443	primiparity;m_bmiincl;m_hbincl;GWG;m_muacincl	FALSE
Clostridium_P.perfringens	Tri2, mother	Pre+Postnatal	4.05937e-05	-1.23097e-05	9.34971e-05	4	0.128293	0.73443	primiparity;m_bmiincl;w_age;m_heightincl	FALSE
CAG.83.sp900545585	Tri2, mother	Pre+Postnatal	0.000159949	-0.000412224	0.000732123	4	0.573382	0.86342	primiparity;m_bmiincl;m_hbincl;GWG;w_age;m_muacincl	FALSE
F23.B02.sp900545805	Tri2, mother	Pre+Postnatal	-0.000107615	-0.000450911	0.000235681	-4	0.5273	0.843245	primiparity;m_bmiincl;m_hbincl;ga_days_incl;GWG;w_age;m_heightincl;m_muacincl	FALSE
Acetatifactor.sp900066565	Tri2, mother	Pre+Postnatal	-7.40065e-05	-0.000943646	0.000795633	-4	0.863721	0.950271	primiparity;m_bmiincl;m_hbincl;GWG;w_age	FALSE
Sutterella.wadsworthensis_A	Tri2, mother	Pre+Postnatal	-7.60581e-05	-0.00114791	0.000995795	-4	0.885867	0.962592	primiparity;m_bmiincl;m_hbincl;ga_days_incl;GWG;w_age;m_heightincl;m_muacincl	FALSE
Unknown_UMGS995	Tri2, mother	Pre+Postnatal	-0.000250422	-0.00101865	0.00051781	-4	0.511812	0.842261	m_bmiincl;m_hbincl;ga_days_incl;GWG;w_age;m_muacincl	FALSE
Lachnospira.eligens_B	Tri2, mother	Pre+Postnatal	7.99975e-05	-0.000312958	0.000472953	4	0.681418	0.896089	primiparity;m_bmiincl;ga_days_incl;GWG;m_heightincl;m_muacincl	FALSE
Roseburia.hominis	Tri2, mother	Pre+Postnatal	-0.000945708	-0.00297202	0.0010806	-4	0.34925	0.751724	primiparity;m_bmiincl;m_hbincl;ga_days_incl;w_age;m_muacincl	FALSE
CAG.492.sp900557045	Tri2, mother	Pre+Postnatal	-0.000143991	-0.000577602	0.000289621	-4	0.50326	0.839521	primiparity;m_bmiincl;m_hbincl;ga_days_incl;GWG;w_age;m_heightincl;m_muacincl	FALSE
CAG.724.sp003524145	Tri2, mother	Pre+Postnatal	-3.90874e-05	-8.35051e-05	5.33034e-06	-4	0.0825744	0.73443	primiparity;m_hbincl;ga_days_incl;GWG;w_age;m_heightincl	FALSE
Agathobaculum.sp900555465	Tri2, mother	Pre+Postnatal	0			0
Barnesiella.sp900542255	Tri2, mother	Pre+Postnatal	0			0
CAG.594.sp900547225	Tri2, mother	Pre+Postnatal	-2.83677e-05	-0.000135469	7.87333e-05	-4	0.592917	0.871672	primiparity;m_bmiincl;m_hbincl;ga_days_incl;GWG;w_age;m_heightincl;m_muacincl	FALSE
F23.B02.sp004556755	Tri2, mother	Pre+Postnatal	-7.07758e-05	-0.000739296	0.000597744	-4	0.83063	0.942601	primiparity;m_bmiincl;m_hbincl;ga_days_incl;GWG;w_age;m_heightincl	FALSE
Faecalibacterium.prausnitzii_J	Tri2, mother	Pre+Postnatal	-6.60464e-05	-0.000860436	0.000728344	-4	0.866585	0.95185	primiparity;m_bmiincl;m_hbincl;ga_days_incl;GWG;w_age;m_heightincl	FALSE
Unknown_UMGS1810	Tri2, mother	Pre+Postnatal	0.00189335	0.00042778	0.00335891	4	0.0129712	0.73443	primiparity;m_bmiincl;m_hbincl;GWG;w_age;m_heightincl;m_muacincl	TRUE
CAG.110.sp900551495	Tri2, mother	Pre+Postnatal	-4.64517e-05	-0.000169119	7.62161e-05	-4	0.446162	0.812306	primiparity;m_bmiincl;m_hbincl;ga_days_incl;GWG;w_age;m_muacincl	FALSE
Veillonella.sp900538355	Tri2, mother	Pre+Postnatal	-1.74495e-07	-0.000136205	0.000135856	-0.0319934	0.997929	0.999651	primiparity;m_bmiincl;m_hbincl;ga_days_incl;GWG;w_age;m_heightincl;m_muacincl	FALSE
Eubacterium_R.sp000434995	Tri2, mother	Pre+Postnatal	0.000476728	-0.000122002	0.00107546	4	0.114874	0.73443	primiparity;m_bmiincl;w_age;m_heightincl;m_muacincl	FALSE
Unknown_CAG.724	Tri2, mother	Pre+Postnatal	9.35861e-05	-0.000120659	0.000307831	4	0.380928	0.775858	primiparity;m_bmiincl;m_hbincl;w_age;m_muacincl	FALSE
Parolsenella.sp900549525	Tri2, mother	Pre+Postnatal	0			0
Tidjanibacter.inops	Tri2, mother	Pre+Postnatal	0			0
Unknown_CAG.594	Tri2, mother	Pre+Postnatal	-6.15538e-05	-0.00040267	0.000279563	-4	0.715355	0.902872	primiparity;m_bmiincl;m_hbincl;ga_days_incl;GWG;w_age;m_heightincl;m_muacincl	FALSE
UBA3388.sp900545215	Tri2, mother	Pre+Postnatal	0.000458679	-0.00142556	0.00234292	4	0.623698	0.873478	primiparity;m_bmiincl;m_hbincl;w_age;m_heightincl;m_muacincl	FALSE
Alistipes.sp900549305	Tri2, mother	Pre+Postnatal	0			0
Gemmiger.sp900554145	Tri2, mother	Pre+Postnatal	0.000289906	-0.000439851	0.00101966	4	0.423987	0.81213	primiparity;m_bmiincl;m_hbincl;ga_days_incl;GWG;w_age;m_heightincl;m_muacincl	FALSE
CAG.115.sp000432175	Tri2, mother	Pre+Postnatal	0.000194125	-0.000124183	0.000512432	4	0.223436	0.73443	primiparity;m_bmiincl;m_hbincl;w_age;m_heightincl;m_muacincl	FALSE
CAG.279.sp900544305	Tri2, mother	Pre+Postnatal	0			0
Unknown_Pauljensenia	Tri2, mother	Pre+Postnatal	0			0
CAG.460.sp900544625	Tri2, mother	Pre+Postnatal	2.00799e-06	-0.000187791	0.000191807	0.368162	0.982924	0.993189	primiparity;m_bmiincl;m_hbincl;ga_days_incl;GWG;w_age;m_heightincl;m_muacincl	FALSE
Enterobacter.himalayensis	Tri2, mother	Pre+Postnatal	-0.000433538	-0.000886409	1.93343e-05	-4	0.0599868	0.73443	m_bmiincl;m_hbincl;ga_days_incl;GWG;w_age;m_heightincl;m_muacincl	FALSE
UBA737.sp002431945	Tri2, mother	Pre+Postnatal	-0.000465618	-0.0016463	0.000715061	-4	0.428096	0.81213	primiparity;m_bmiincl;ga_days_incl;w_age;m_heightincl;m_muacincl	FALSE
Unknown_UBA738	Tri2, mother	Pre+Postnatal	7.47729e-05	-0.000682292	0.000831838	4	0.841977	0.942601	m_bmiincl;m_hbincl;ga_days_incl;GWG;w_age;m_muacincl	FALSE
Faecalibacterium.prausnitzii	Tri2, mother	Pre+Postnatal	-0.00064886	-0.00151165	0.000213926	-4	0.135379	0.73443	primiparity;m_bmiincl;m_hbincl;ga_days_incl;GWG;m_heightincl;m_muacincl	FALSE
CAG.170.sp900553545	Tri2, mother	Pre+Postnatal	8.53393e-05	-0.000389787	0.000560465	4	0.716611	0.902872	primiparity;m_bmiincl;m_hbincl;ga_days_incl;GWG;w_age;m_heightincl;m_muacincl	FALSE
Prevotella.sp900557405	Tri2, mother	Pre+Postnatal	-0.000178741	-0.00122696	0.000869481	-4	0.730615	0.908251	primiparity;m_bmiincl;m_hbincl;ga_days_incl;GWG;w_age;m_heightincl	FALSE
CAG.475.sp000434435	Tri2, mother	Pre+Postnatal	4.75825e-05	-0.000199934	0.000295099	4	0.698923	0.902872	primiparity;w_age;m_heightincl	FALSE
CAG.590.sp000431135	Tri2, mother	Pre+Postnatal	9.34585e-05	-0.000149697	0.000336614	4	0.439046	0.812306	primiparity;m_bmiincl;m_hbincl;ga_days_incl;GWG;w_age;m_heightincl;m_muacincl	FALSE
Gemmiger.sp900540595	Tri2, mother	Pre+Postnatal	0.000163911	-0.000287681	0.000615504	4	0.464708	0.81657	primiparity;m_bmiincl;m_hbincl;ga_days_incl;GWG;w_age;m_heightincl;m_muacincl	FALSE
CAG.110.sp900553805	Tri2, mother	Pre+Postnatal	-0.000349626	-0.00150687	0.000807614	-4	0.543313	0.850439	primiparity;m_bmiincl;m_hbincl;w_age;m_muacincl	FALSE
Unknown_UBA5905	Tri2, mother	Pre+Postnatal	-0.00122151	-0.00298577	0.000542744	-4	0.167883	0.73443	primiparity;m_bmiincl;m_hbincl;ga_days_incl;GWG;w_age;m_heightincl;m_muacincl	FALSE
Zag1.sp900556295	Tri2, mother	Pre+Postnatal	-2.96367e-05	-0.000168584	0.000109311	-4	0.667415	0.892326	primiparity;ga_days_incl;GWG;w_age;m_heightincl	FALSE
Alistipes.onderdonkii	Tri2, mother	Pre+Postnatal	0.000530339	-0.000459966	0.00152064	4	0.284104	0.751571	primiparity;m_bmiincl;m_hbincl;GWG;w_age	FALSE
Unknown_CAG.269	Tri2, mother	Pre+Postnatal	0.00143037	-0.000501842	0.00336258	4	0.14122	0.73443	primiparity;m_bmiincl;m_hbincl;ga_days_incl;GWG;w_age;m_heightincl;m_muacincl	FALSE
Unknown_Bulleidia	Tri2, mother	Pre+Postnatal	0.000378886	-0.000171161	0.000928933	4	0.170795	0.73443	primiparity;m_hbincl;ga_days_incl;w_age	FALSE
Unknown_Parabacteroides	Tri2, mother	Pre+Postnatal	0.000159714	-0.000233865	0.000553294	4	0.414204	0.809581	primiparity;m_bmiincl;m_hbincl;ga_days_incl;GWG;w_age;m_heightincl;m_muacincl	FALSE
Phascolarctobacterium.faecium	Tri2, mother	Pre+Postnatal	0			0
X51.20.sp900542055	Tri2, mother	Pre+Postnatal	2.23439e-05	-0.000108835	0.000153523	4	0.730897	0.908251	primiparity;m_bmiincl;m_hbincl;ga_days_incl;GWG;w_age;m_heightincl	FALSE
Bacteroides.clarus	Tri2, mother	Pre+Postnatal	0.000202607	-0.000124401	0.000529615	4	0.216557	0.73443	primiparity;m_hbincl;GWG;w_age;m_heightincl	FALSE
Enterococcus_A.avium	Tri2, mother	Pre+Postnatal	0			0
Faecalibacterium.sp900539885	Tri2, mother	Pre+Postnatal	-3.38997e-05	-0.00105227	0.000984468	-4	0.946308	0.977569	primiparity;m_bmiincl;m_hbincl;ga_days_incl;GWG;w_age;m_heightincl;m_muacincl	FALSE
Unknown_CAG.1435	Tri2, mother	Pre+Postnatal	3.15124e-05	-0.000163465	0.00022649	4	0.744142	0.913265	primiparity;m_bmiincl;m_hbincl;ga_days_incl;GWG;w_age;m_muacincl	FALSE
SFEL01.sp004557245	Tri2, mother	Pre+Postnatal	-0.000119558	-0.000755466	0.00051635	-4	0.704002	0.902872	primiparity;m_bmiincl;m_hbincl;ga_days_incl;GWG;w_age;m_heightincl;m_muacincl	FALSE
Unknown_Muribaculaceae	Tri2, mother	Pre+Postnatal	0.000785605	-0.000274599	0.00184581	4	0.14102	0.73443	primiparity;m_bmiincl;m_hbincl;GWG;w_age;m_heightincl;m_muacincl	FALSE
Bulleidia.sp900539965	Tri2, mother	Pre+Postnatal	5.66649e-06	-3.42406e-05	4.55736e-05	1.03894	0.774054	0.922666	primiparity;m_bmiincl;m_hbincl;ga_days_incl;GWG;w_age;m_heightincl;m_muacincl	FALSE
Gemmiger.sp900548355	Tri2, mother	Pre+Postnatal	0			0
Unknown_Arcanobacterium_A	Tri2, mother	Pre+Postnatal	0			0
CAG.269.sp000431335	Tri2, mother	Pre+Postnatal	-2.06047e-05	-0.000454223	0.000413013	-3.77785	0.923419	0.971053	primiparity;m_bmiincl;m_hbincl;ga_days_incl;GWG;w_age;m_heightincl;m_muacincl	FALSE
Rs.D84.sp900550495	Tri2, mother	Pre+Postnatal	0			0
Enterococcus.faecalis	Tri2, mother	Pre+Postnatal	-1.77375e-05	-6.82525e-05	3.27776e-05	-3.25214	0.480673	0.827496	m_hbincl;GWG;w_age;m_muacincl	FALSE
Bacteroides_F.pectinophilus	Tri2, mother	Pre+Postnatal	-7.66756e-05	-0.000779176	0.000625825	-4	0.825474	0.939584	primiparity;m_bmiincl;m_hbincl;ga_days_incl;GWG;w_age;m_heightincl	FALSE
Dialister.sp900538805	Tri2, mother	Pre+Postnatal	0			0
UBA1777.sp900549485	Tri2, mother	Pre+Postnatal	-0.000541907	-0.00211888	0.00103507	-4	0.489006	0.83368	primiparity;m_bmiincl;m_hbincl;ga_days_incl;w_age;m_heightincl;m_muacincl	FALSE
Unknown_CAG.508	Tri2, mother	Pre+Postnatal	0.000939027	-9.2636e-05	0.00197069	4	0.0731302	0.73443	primiparity;m_bmiincl;w_age	FALSE
Unknown_UMGS2037	Tri2, mother	Pre+Postnatal	0.000149641	-0.000597586	0.000896869	4	0.685761	0.897899	primiparity;m_bmiincl;m_hbincl;ga_days_incl;GWG;w_age;m_heightincl;m_muacincl	FALSE
Eubacterium_R.sp000436835	Tri2, mother	Pre+Postnatal	-0.000427864	-0.00118223	0.000326507	-4	0.256815	0.748923	primiparity;m_bmiincl;m_hbincl;GWG;w_age;m_heightincl	FALSE
CAG.312.sp002405555	Tri2, mother	Pre+Postnatal	6.3466e-05	-0.000166079	0.000293011	4	0.577235	0.864735	primiparity;m_bmiincl;m_hbincl;ga_days_incl;GWG;w_age;m_heightincl	FALSE
CAG.273.sp003534295	Tri2, mother	Pre+Postnatal	-0.000610446	-0.00210048	0.000879589	-4	0.410891	0.809573	primiparity;m_bmiincl;m_hbincl;w_age;m_muacincl	FALSE
Unknown_Fibrobacteraceae	Tri2, mother	Pre+Postnatal	0			0
RUG472.sp900545265	Tri2, mother	Pre+Postnatal	-0.000250828	-0.000806555	0.000304899	-4	0.36478	0.768075	primiparity;m_bmiincl;m_hbincl;ga_days_incl;GWG;w_age;m_heightincl	FALSE
Lachnospira.sp900547255	Tri2, mother	Pre+Postnatal	-0.000293959	-0.00200807	0.00142015	-4	0.729137	0.908251	primiparity;m_bmiincl;m_hbincl;ga_days_incl;GWG;w_age;m_muacincl	FALSE
Desulfovibrio.fairfieldensis	Tri2, mother	Pre+Postnatal	0			0
Ruminococcus_D.bicirculans	Tri2, mother	Pre+Postnatal	-5.68712e-05	-0.000211996	9.82535e-05	-4	0.461359	0.814039	primiparity;m_bmiincl;ga_days_incl;w_age;m_heightincl	FALSE
UMGS1826.sp900555435	Tri2, mother	Pre+Postnatal	0.000261142	-0.000697027	0.00121931	4	0.58298	0.868858	m_bmiincl;m_hbincl;ga_days_incl;w_age;m_heightincl;m_muacincl	FALSE
Phascolarctobacterium_A.sp900541915	Tri2, mother	Pre+Postnatal	0			0
Erysipelatoclostridium.sp002160495	Tri2, mother	Pre+Postnatal	0			0
Alistipes.senegalensis	Tri2, mother	Pre+Postnatal	0.000218135	-0.000590784	0.00102705	4	0.586624	0.871631	primiparity;m_bmiincl;m_hbincl;GWG;w_age;m_heightincl;m_muacincl	FALSE
Unknown_Helicobacteraceae	Tri2, mother	Pre+Postnatal	0.000172102	-0.00010567	0.000449873	4	0.216557	0.73443	primiparity;m_hbincl;GWG;w_age;m_heightincl	FALSE
CAG.791.sp000431495	Tri2, mother	Pre+Postnatal	-0.000211509	-0.00127491	0.000851892	-4	0.687782	0.897899	primiparity;m_bmiincl;m_hbincl;ga_days_incl;GWG;w_age;m_heightincl;m_muacincl	FALSE
Unknown_UBA4636	Tri2, mother	Pre+Postnatal	4.37282e-05	-0.000131224	0.000218681	4	0.614162	0.872968	primiparity;m_bmiincl;m_hbincl;GWG;w_age;m_heightincl;m_muacincl	FALSE
Brachyspira.sp000431595	Tri2, mother	Pre+Postnatal	-9.06964e-06	-0.000540737	0.000522598	-1.66291	0.972469	0.988648	primiparity;m_bmiincl;m_hbincl;ga_days_incl;GWG;w_age;m_heightincl;m_muacincl	FALSE
Veillonella.atypica	Tri2, mother	Pre+Postnatal	2.79961e-05	-8.27856e-05	0.000138778	4	0.610573	0.872968	primiparity;m_bmiincl;m_hbincl;GWG;w_age;m_heightincl	FALSE
Faecalibacterium.sp900539945	Tri2, mother	Pre+Postnatal	-0.000284692	-0.00112664	0.000557257	-4	0.495557	0.834743	primiparity;m_bmiincl;m_hbincl;ga_days_incl;GWG;w_age;m_heightincl;m_muacincl	FALSE
CAG.1000.sp000436975	Tri2, mother	Pre+Postnatal	-1.07621e-05	-0.000216374	0.00019485	-1.97322	0.915674	0.969759	primiparity;m_bmiincl;m_hbincl;ga_days_incl;GWG;w_age;m_heightincl;m_muacincl	FALSE
Unknown_UBA4644	Tri2, mother	Pre+Postnatal	0.000245006	-0.000386051	0.000876063	4	0.435896	0.81213	primiparity;m_bmiincl;ga_days_incl;w_age	FALSE
CAG.110.sp900544945	Tri2, mother	Pre+Postnatal	0.00107621	-0.000599843	0.00275227	4	0.199957	0.73443	primiparity;m_bmiincl;m_hbincl;ga_days_incl;GWG;w_age;m_heightincl;m_muacincl	FALSE
Haemophilus_D.parainfluenzae_K	Tri2, mother	Pre+Postnatal	-8.50147e-05	-0.000299182	0.000129152	-4	0.424344	0.81213	primiparity;m_bmiincl;m_hbincl;ga_days_incl;GWG;w_age;m_heightincl;m_muacincl	FALSE
CAG.841.sp000437375	Tri2, mother	Pre+Postnatal	0.000849305	-0.000609715	0.00230832	4	0.245517	0.743284	primiparity;m_bmiincl;m_heightincl	FALSE
Unknown_CAG.74	Tri2, mother	Pre+Postnatal	-0.000160641	-0.000566345	0.000245063	-4	0.425888	0.81213	primiparity;m_hbincl;ga_days_incl;GWG;w_age;m_heightincl;m_muacincl	FALSE
UMGS1820.sp900545865	Tri2, mother	Pre+Postnatal	-0.000282312	-0.00124473	0.000680108	-4	0.554717	0.851959	primiparity;m_bmiincl;GWG;w_age;m_heightincl;m_muacincl	FALSE
Desulfovibrio.sp900319575	Tri2, mother	Pre+Postnatal	-0.000862285	-0.002023	0.000298431	-4	0.140349	0.73443	primiparity;m_hbincl;ga_days_incl;w_age;m_heightincl	FALSE
Pseudomonas.aeruginosa	Tri2, mother	Pre+Postnatal	0			0
Unknown_UMGS1826	Tri2, mother	Pre+Postnatal	-0.000221214	-0.000813849	0.000371421	-4	0.452235	0.812504	primiparity;m_bmiincl;m_hbincl;ga_days_incl;GWG;w_age;m_heightincl;m_muacincl	FALSE
Unknown_CAG.239	Tri2, mother	Pre+Postnatal	8.70402e-05	-0.000839659	0.00101374	4	0.84988	0.942788	primiparity;m_hbincl;w_age;m_heightincl	FALSE
Treponema_D.berlinense	Tri2, mother	Pre+Postnatal	-0.000939893	-0.00271944	0.000839658	-4	0.290368	0.751571	m_bmiincl;ga_days_incl;GWG;w_age;m_heightincl;m_muacincl	FALSE
RC9.sp000435075	Tri2, mother	Pre+Postnatal	-9.68668e-05	-0.00109982	0.000906089	-4	0.84513	0.942788	primiparity;m_bmiincl;m_hbincl;ga_days_incl;GWG;w_age;m_heightincl;m_muacincl	FALSE
CAG.83.sp900552475	Tri2, mother	Pre+Postnatal	0.000213982	-0.000172622	0.000600587	4	0.26854	0.751571	primiparity;m_hbincl;GWG;w_age;m_muacincl	FALSE
Faecalibacterium.sp003449675	Tri2, mother	Pre+Postnatal	9.44892e-05	-0.00039372	0.000582698	4	0.695743	0.902872	primiparity;m_bmiincl;m_hbincl;ga_days_incl;GWG;w_age;m_heightincl;m_muacincl	FALSE
Porphyromonas.sp900548415	Tri2, mother	Pre+Postnatal	0			0
Unknown_Haemophilus_D	Tri2, mother	Pre+Postnatal	-0.000197439	-0.000517616	0.000122739	-4	0.218686	0.73443	primiparity;m_bmiincl;m_hbincl;GWG;w_age	FALSE
Unknown_CAG.115	Tri2, mother	Pre+Postnatal	0.00056582	-6.21187e-05	0.00119376	4	0.0758449	0.73443	primiparity;m_hbincl;w_age;m_heightincl;m_muacincl	FALSE
Unknown_UBA5026	Tri2, mother	Pre+Postnatal	1.44987e-06	-0.000215303	0.000218202	0.265831	0.989203	0.995203	primiparity;m_bmiincl;m_hbincl;ga_days_incl;GWG;w_age;m_heightincl;m_muacincl	FALSE
Mitsuokella.jalaludinii	Tri2, mother	Pre+Postnatal	-0.00031418	-0.000751585	0.000123225	-4	0.153196	0.73443	m_bmiincl;m_hbincl;ga_days_incl;GWG;w_age;m_heightincl;m_muacincl	FALSE
Zag1.sp001765415	Tri2, mother	Pre+Postnatal	0.000636181	-0.000529298	0.00180166	4	0.275082	0.751571	primiparity;m_bmiincl;GWG;w_age;m_muacincl	FALSE
SFMI01.sp004556155	Tri2, mother	Pre+Postnatal	0.000129066	-0.000965713	0.00122385	4	0.811754	0.938259	primiparity;m_hbincl;ga_days_incl;GWG;w_age;m_heightincl;m_muacincl	FALSE
UMGS1781.sp900553695	Tri2, mother	Pre+Postnatal	2.31113e-05	-0.000435446	0.000481669	4	0.918791	0.969759	primiparity;m_bmiincl;m_hbincl;ga_days_incl;GWG;w_age;m_heightincl;m_muacincl	FALSE
UBA3631.sp900544605	Tri2, mother	Pre+Postnatal	2.58914e-05	-0.000217266	0.000269048	4	0.829669	0.942601	primiparity;m_bmiincl;ga_days_incl;GWG;w_age;m_heightincl;m_muacincl	FALSE
Unknown_UMGS1907	Tri2, mother	Pre+Postnatal	0			0
UMGS1840.sp900555525	Tri2, mother	Pre+Postnatal	3.09863e-05	-0.00027516	0.000337133	4	0.837968	0.942601	primiparity;m_bmiincl;m_hbincl;GWG;w_age;m_heightincl;m_muacincl	FALSE
CAG.110.sp900546415	Tri2, mother	Pre+Postnatal	-4.18001e-05	-0.000467099	0.000383499	-4	0.842739	0.942601	primiparity;m_bmiincl;m_hbincl;w_age;m_heightincl;m_muacincl	FALSE
CAG.521.sp002329575	Tri2, mother	Pre+Postnatal	0.000602113	-0.000369696	0.00157392	4	0.216557	0.73443	primiparity;m_hbincl;GWG;w_age;m_heightincl	FALSE
Anaerovibrio.sp900548165	Tri2, mother	Pre+Postnatal	8.90552e-05	-0.000576442	0.000754552	4	0.786723	0.929181	primiparity;m_bmiincl;m_hbincl;ga_days_incl;GWG;w_age;m_heightincl;m_muacincl	FALSE
CAG.110.sp900549495	Tri2, mother	Pre+Postnatal	-1.36292e-05	-0.000157729	0.000130471	-2.49889	0.848587	0.942788	m_bmiincl;ga_days_incl;GWG;w_age;m_heightincl;m_muacincl	FALSE
Unknown_SFFH01	Tri2, mother	Pre+Postnatal	-4.00952e-05	-0.000796644	0.000716454	-4	0.914622	0.969759	primiparity;m_bmiincl;m_hbincl;ga_days_incl;GWG;w_age;m_heightincl;m_muacincl	FALSE
Unknown_Acutalibacteraceae	Tri2, mother	Pre+Postnatal	0.00015112	-0.000309911	0.000612151	4	0.508746	0.841388	primiparity;m_bmiincl;m_hbincl;ga_days_incl;GWG;w_age;m_heightincl;m_muacincl	FALSE
Unknown_Mediterraneibacter	Tri2, mother	Pre+Postnatal	0.000179805	6.4777e-06	0.000353133	4	0.042438	0.73443	primiparity;w_age;m_heightincl	TRUE
SFJ001.sp004555865	Tri2, mother	Pre+Postnatal	5.02276e-05	-0.000683427	0.000783882	4	0.889966	0.962592	primiparity;m_bmiincl;m_hbincl;ga_days_incl;GWG;w_age;m_muacincl	FALSE
CAG.196.sp900549855	Tri2, mother	Pre+Postnatal	0.000191549	-0.000125801	0.000508898	4	0.227571	0.73443	primiparity;m_bmiincl;m_hbincl;ga_days_incl;GWG;w_age;m_heightincl;m_muacincl	FALSE
Unknown_Rs.D84_1	Tri2, mother	Pre+Postnatal	6.92246e-06	-5.56141e-05	6.9459e-05	1.26922	0.823502	0.938259	primiparity;m_hbincl;GWG;w_age	FALSE
CAG.110.sp900547405	Tri2, mother	Pre+Postnatal	0.000697614	7.48643e-06	0.00138774	4	0.0476888	0.73443	ga_days_incl;m_heightincl	TRUE
Agathobacter.sp900550545	Tri2, mother	Pre+Postnatal	0.000635617	-0.000573466	0.0018447	4	0.292261	0.751571	primiparity;m_bmiincl;m_hbincl;GWG;w_age;m_heightincl;m_muacincl	FALSE
Cronobacter.sakazakii	Tri2, mother	Pre+Postnatal	0			0
Unknown_UMGS1783_2	Tri2, mother	Pre+Postnatal	-4.2161e-05	-0.000290461	0.000206139	-4	0.731451	0.908251	primiparity;m_bmiincl;m_hbincl;ga_days_incl;GWG;w_age;m_heightincl;m_muacincl	FALSE
Zag111.sp002102825	Tri2, mother	Pre+Postnatal	-0.000213538	-0.00141172	0.000984649	-4	0.718716	0.902872	primiparity;m_bmiincl;m_hbincl;ga_days_incl;GWG;w_age;m_heightincl;m_muacincl	FALSE
UBA1752.sp900554405	Tri2, mother	Pre+Postnatal	6.12063e-05	-0.000679993	0.000802406	4	0.867831	0.952317	primiparity;GWG;w_age;m_muacincl	FALSE
Unknown_Borkfalkiaceae	Tri2, mother	Pre+Postnatal	0.000120447	-7.30771e-05	0.00031397	4	0.214529	0.73443	m_bmiincl;m_hbincl;ga_days_incl;GWG;m_muacincl	FALSE
CAG.302.sp900543825	Tri2, mother	Pre+Postnatal	-0.000120484	-0.000326	8.50319e-05	-4	0.241744	0.740542	primiparity;m_hbincl;ga_days_incl;GWG;m_heightincl	FALSE
Faecalibacterium.prausnitzii_I	Tri2, mother	Pre+Postnatal	-0.000412851	-0.00103351	0.000207804	-4	0.184689	0.73443	primiparity;m_bmiincl;m_hbincl;ga_days_incl;GWG;w_age;m_heightincl;m_muacincl	FALSE
Unknown_Cetobacterium_A	Tri2, mother	Pre+Postnatal	0			0
CAG.170.sp900548625	Tri2, mother	Pre+Postnatal	0.00066901	-0.000198653	0.00153667	4	0.126118	0.73443	primiparity;m_bmiincl;m_hbincl;GWG;w_age;m_heightincl;m_muacincl	FALSE
Ruminococcus_F.champanellensis	Tri2, mother	Pre+Postnatal	-0.00111801	-0.00294681	0.000710777	-4	0.221796	0.73443	primiparity;m_bmiincl;m_hbincl;ga_days_incl;GWG;w_age;m_heightincl;m_muacincl	FALSE
CAG.83.sp900550615	Tri2, mother	Pre+Postnatal	-2.72633e-05	-0.000326874	0.000272347	-4	0.854258	0.943702	primiparity;m_bmiincl;m_hbincl;GWG;m_heightincl;m_muacincl	FALSE
Unknown_UBA1436	Tri2, mother	Pre+Postnatal	0.000116828	-5.48338e-06	0.000239139	4	0.060509	0.73443	primiparity;m_bmiincl;m_hbincl;ga_days_incl;GWG;w_age;m_heightincl;m_muacincl	FALSE
CAG.170.sp003516765	Tri2, mother	Pre+Postnatal	-5.83492e-05	-0.000796855	0.000680157	-4	0.873154	0.955994	primiparity;m_bmiincl;m_hbincl;ga_days_incl;GWG;w_age;m_heightincl	FALSE
Clostridium.paraputrificum	Tri2, mother	Pre+Postnatal	0			0
Prevotella.sp900552675	Tri2, mother	Pre+Postnatal	-0.000718174	-0.00158897	0.000152619	-4	0.102807	0.73443	primiparity;m_bmiincl;ga_days_incl;GWG;w_age;m_heightincl	FALSE
UBA6984.sp900550295	Tri2, mother	Pre+Postnatal	0.00010698	-9.91298e-05	0.000313089	4	0.298638	0.751571	primiparity;m_bmiincl;ga_days_incl;w_age;m_heightincl;m_muacincl	FALSE
CAG.83.sp900550585	Tri2, mother	Pre+Postnatal	7.73081e-05	-0.000137035	0.000291651	4	0.468595	0.816875	m_hbincl;ga_days_incl;GWG;w_age;m_heightincl	FALSE
CAG.582.sp000435515	Tri2, mother	Pre+Postnatal	0.000246431	-0.000223286	0.000716148	4	0.293547	0.751571	primiparity;m_bmiincl;ga_days_incl;GWG;m_heightincl;m_muacincl	FALSE
CAG.605.sp000433255	Tri2, mother	Pre+Postnatal	3.29595e-05	-0.000236339	0.000302258	4	0.80453	0.938259	primiparity;m_bmiincl;m_hbincl;ga_days_incl;GWG;w_age;m_heightincl;m_muacincl	FALSE
Veillonella.dispar	Tri2, mother	Pre+Postnatal	0			0
Unknown_Mogibacterium	Tri2, mother	Pre+Postnatal	-6.39038e-05	-0.000148996	2.11886e-05	-4	0.136346	0.73443	primiparity;ga_days_incl;w_age;m_heightincl	FALSE
Gemmiger.sp900540775	Tri2, mother	Pre+Postnatal	0.000254577	-0.000133942	0.000643095	4	0.191842	0.73443	m_bmiincl;m_hbincl;w_age;m_heightincl;m_muacincl	FALSE
Hungatella.effluvii	Tri2, mother	Pre+Postnatal	0			0
Lawsonibacter.sp900066825	Tri2, mother	Pre+Postnatal	0			0
Lachnospira.sp900316325	Tri2, mother	Pre+Postnatal	-0.000196194	-0.000429131	3.67422e-05	-4	0.0959827	0.73443	primiparity;m_bmiincl;m_hbincl;GWG;w_age;m_muacincl	FALSE
Parolsenella.massiliensis	Tri2, mother	Pre+Postnatal	-0.000230532	-0.000460671	-3.92799e-07	-4	0.0496323	0.73443	primiparity;m_bmiincl;ga_days_incl;GWG;w_age;m_heightincl	TRUE
Collinsella.vaginalis	Tri2, mother	Pre+Postnatal	0			0
Unknown_UBA1740	Tri2, mother	Pre+Postnatal	0.000198179	1.61002e-05	0.000380257	4	0.0338183	0.73443	primiparity;m_bmiincl;m_hbincl;GWG;w_age;m_muacincl	TRUE
CAG.882.sp000435595	Tri2, mother	Pre+Postnatal	0.000398179	-0.000262499	0.00105886	4	0.228254	0.73443	primiparity;m_bmiincl;m_hbincl;ga_days_incl;GWG;w_age;m_heightincl;m_muacincl	FALSE
UMGS1279.sp900550315	Tri2, mother	Pre+Postnatal	-8.74055e-05	-0.000338052	0.000163241	-4	0.482651	0.827707	primiparity;m_bmiincl;ga_days_incl;GWG;w_age;m_heightincl;m_muacincl	FALSE
Alistipes_A.indistinctus	Tri2, mother	Pre+Postnatal	-1.78177e-05	-4.68465e-05	1.12111e-05	-3.26685	0.220534	0.73443	m_bmiincl;ga_days_incl;GWG;w_age;m_heightincl;m_muacincl	FALSE
Unknown_CAG.196	Tri2, mother	Pre+Postnatal	0.00109092	-0.000210657	0.0023925	4	0.0976318	0.73443	primiparity;m_bmiincl;m_hbincl;GWG;w_age	FALSE
F23.B02.sp900556535	Tri2, mother	Pre+Postnatal	-9.1319e-05	-0.000371182	0.000188544	-4	0.511036	0.842261	primiparity;m_bmiincl;m_hbincl;ga_days_incl;GWG;m_heightincl;m_muacincl	FALSE
Lachnospira.sp003451515	Tri2, mother	Pre+Postnatal	0.00044149	-7.49125e-05	0.000957892	4	0.0913626	0.73443	primiparity;m_bmiincl;m_hbincl;GWG;w_age	FALSE
GCA.900066995.sp900291955	Tri2, mother	Pre+Postnatal	-0.000168847	-0.000587669	0.000249974	-4	0.417227	0.81213	primiparity;m_bmiincl;m_hbincl;ga_days_incl;GWG;w_age;m_heightincl;m_muacincl	FALSE
CAG.533.sp000434495	Tri2, mother	Pre+Postnatal	-1.40705e-05	-0.0002931	0.000264959	-2.57981	0.918748	0.969759	primiparity;m_bmiincl;m_hbincl;ga_days_incl;GWG;w_age;m_heightincl;m_muacincl	FALSE
UBA737.sp900543215	Tri2, mother	Pre+Postnatal	-4.61957e-05	-0.000140751	4.83599e-05	-4	0.327468	0.751571	primiparity;m_bmiincl;m_hbincl;ga_days_incl;w_age;m_muacincl	FALSE
CAG.170.sp900545925	Tri2, mother	Pre+Postnatal	1.5616e-05	-0.000654493	0.000685725	2.86318	0.962435	0.985236	primiparity;m_bmiincl;m_hbincl;ga_days_incl;GWG;w_age;m_heightincl	FALSE
Unknown_Anaeroplasmataceae	Tri2, mother	Pre+Postnatal	0.000140739	-1.75409e-05	0.000299019	4	0.0796145	0.73443	primiparity;m_bmiincl;GWG;m_heightincl;m_muacincl	FALSE
UBA2883.sp002103075	Tri2, mother	Pre+Postnatal	0.000180997	-0.000213725	0.000575719	4	0.358287	0.76325	primiparity;m_hbincl;GWG;m_heightincl	FALSE
Methanobrevibacter_A.smithii	Tri2, mother	Pre+Postnatal	0.000118621	-0.000636639	0.000873881	4	0.750871	0.915227	primiparity;m_bmiincl;m_hbincl;ga_days_incl;GWG;w_age;m_heightincl;m_muacincl	FALSE
CAG.1000.sp004560915	Tri2, mother	Pre+Postnatal	9.60667e-05	-0.00020624	0.000398374	4	0.522741	0.842261	primiparity;m_bmiincl;GWG;w_age;m_muacincl	FALSE
Akkermansia.sp004167605	Tri2, mother	Pre+Postnatal	0.000729205	-0.00044773	0.00190614	4	0.216557	0.73443	primiparity;m_hbincl;GWG;w_age;m_heightincl	FALSE
UMGS1883.sp900555935	Tri2, mother	Pre+Postnatal	-0.000108716	-0.000438347	0.000220915	-4	0.50615	0.841307	primiparity;m_bmiincl;m_hbincl;ga_days_incl;GWG;w_age;m_heightincl;m_muacincl	FALSE
CAG.533.sp004563275	Tri2, mother	Pre+Postnatal	6.58256e-05	-0.000385026	0.000516677	4	0.768085	0.919895	primiparity;m_bmiincl;m_hbincl;ga_days_incl;GWG;m_heightincl;m_muacincl	FALSE
Unknown_Elusimicrobiaceae	Tri2, mother	Pre+Postnatal	-0.00012323	-0.00090164	0.00065518	-4	0.748958	0.915227	primiparity;m_bmiincl;m_hbincl;ga_days_incl;GWG;w_age;m_heightincl;m_muacincl	FALSE
F23.B02.sp002472405	Tri2, mother	Pre+Postnatal	0.000118852	-0.000329502	0.000567207	4	0.593878	0.871672	m_bmiincl;m_hbincl;GWG;w_age	FALSE
Oscillibacter.sp900544615	Tri2, mother	Pre+Postnatal	-0.000263956	-0.001103	0.000575088	-4	0.525841	0.842261	primiparity;m_bmiincl;m_hbincl;ga_days_incl;GWG;w_age;m_heightincl;m_muacincl	FALSE
CAG.628.sp003524085	Tri2, mother	Pre+Postnatal	1.79489e-05	-0.000112506	0.000148404	3.29091	0.780873	0.926041	primiparity;m_bmiincl;m_hbincl;ga_days_incl;GWG;w_age;m_heightincl;m_muacincl	FALSE
Selenomonas_C.bovis	Tri2, mother	Pre+Postnatal	0			0
UBA6398.sp900550635	Tri2, mother	Pre+Postnatal	0.000727848	-0.000416466	0.00187216	4	0.204858	0.73443	primiparity;m_hbincl;GWG;w_age;m_heightincl	FALSE
UMGS1338.sp900550805	Tri2, mother	Pre+Postnatal	1.80558e-05	-0.00052697	0.000563081	3.3105	0.946718	0.977569	m_bmiincl;ga_days_incl;GWG;w_age;m_muacincl	FALSE
UBA737.sp900549055	Tri2, mother	Pre+Postnatal	0.000283873	-0.000303629	0.000871376	4	0.333364	0.751571	primiparity;m_bmiincl;w_age;m_heightincl	FALSE
Streptococcus.peroris	Tri2, mother	Pre+Postnatal	0			0
Veillonella.sp900552715	Tri2, mother	Pre+Postnatal	1.22839e-05	-3.6324e-05	6.08918e-05	2.25224	0.610573	0.872968	primiparity;m_bmiincl;m_hbincl;GWG;w_age;m_heightincl	FALSE
Unknown_UBA4716	Tri2, mother	Pre+Postnatal	4.46014e-05	-0.000118515	0.000207718	4	0.581075	0.867131	primiparity;m_bmiincl;m_hbincl;ga_days_incl;GWG;w_age;m_heightincl;m_muacincl	FALSE
Oscillibacter.sp004553545	Tri2, mother	Pre+Postnatal	8.59915e-05	-0.000755999	0.000927982	4	0.836363	0.942601	primiparity;m_bmiincl;m_hbincl;ga_days_incl;GWG;w_age;m_heightincl;m_muacincl	FALSE
Unknown_UBA1234_2	Tri2, mother	Pre+Postnatal	0.000449906	-0.000240058	0.00113987	4	0.194159	0.73443	primiparity;m_hbincl;w_age;m_muacincl	FALSE
Unknown_CAG.605	Tri2, mother	Pre+Postnatal	-0.000172148	-0.000739143	0.000394847	-4	0.540661	0.850439	primiparity;m_bmiincl;m_hbincl;ga_days_incl;w_age;m_heightincl;m_muacincl	FALSE
CAG.307.sp001916215	Tri2, mother	Pre+Postnatal	0.000218365	1.55539e-05	0.000421177	4	0.0356091	0.73443	primiparity;w_age;m_heightincl;m_muacincl	TRUE
Victivallis.sp900550905	Tri2, mother	Pre+Postnatal	3.18892e-05	-0.000373734	0.000437513	4	0.873652	0.955994	primiparity;m_bmiincl;m_hbincl;ga_days_incl;GWG;w_age;m_heightincl;m_muacincl	FALSE
Unknown_CAG.245	Tri2, mother	Pre+Postnatal	0.000196492	-0.000175791	0.000568774	4	0.290995	0.751571	primiparity;m_hbincl;GWG;w_age;m_heightincl	FALSE
CAG.245.sp000434195	Tri2, mother	Pre+Postnatal	-0.000197052	-0.000470674	7.65698e-05	-4	0.151968	0.73443	primiparity;m_bmiincl;m_hbincl;ga_days_incl;GWG;w_age;m_heightincl;m_muacincl	FALSE
Oscillibacter.sp900544105	Tri2, mother	Pre+Postnatal	-8.65226e-06	-0.000989629	0.000972325	-1.58638	0.985778	0.995203	primiparity;m_bmiincl;ga_days_incl;GWG;w_age;m_heightincl;m_muacincl	FALSE
AM51.8.sp003478275	Tri2, mother	Pre+Postnatal	-4.45296e-05	-0.000118599	2.95393e-05	-4	0.22967	0.73443	primiparity;m_bmiincl;m_hbincl;ga_days_incl;GWG;m_heightincl;m_muacincl	FALSE
Ruminiclostridium_E.siraeum	Tri2, mother	Pre+Postnatal	0.000680581	-0.000425846	0.00178701	4	0.219811	0.73443	primiparity;m_hbincl;GWG;w_age;m_heightincl	FALSE
GCA.900066575.sp900066385	Tri2, mother	Pre+Postnatal	3.65386e-05	-2.87507e-05	0.000101828	4	0.263069	0.748923	primiparity;m_hbincl;GWG;w_age;m_heightincl;m_muacincl	FALSE
Anaeroglobus.micronuciformis	Tri2, mother	Pre+Postnatal	0			0
Edwardsiella.tarda	Tri2, mother	Pre+Postnatal	0			0
F23.B02.sp001916715	Tri2, mother	Pre+Postnatal	-7.04103e-05	-0.000252365	0.000111544	-4	0.435976	0.81213	primiparity;m_bmiincl;m_hbincl;ga_days_incl;GWG;w_age;m_heightincl;m_muacincl	FALSE
Phascolarctobacterium.sp000436095	Tri2, mother	Pre+Postnatal	0.000665019	-0.00040832	0.00173836	4	0.216557	0.73443	primiparity;m_hbincl;GWG;w_age;m_heightincl	FALSE
UBA7642.sp900549915	Tri2, mother	Pre+Postnatal	-0.000280516	-0.000778884	0.000217853	-4	0.260661	0.748923	primiparity;m_bmiincl;m_hbincl;ga_days_incl;m_heightincl	FALSE
CAG.460.sp000438075	Tri2, mother	Pre+Postnatal	2.92133e-05	-0.000117649	0.000176075	4	0.688563	0.897899	primiparity;m_hbincl;w_age;m_heightincl;m_muacincl	FALSE
Unknown_UBA1381	Tri2, mother	Pre+Postnatal	0.000143337	-0.000729618	0.00101629	4	0.739969	0.910402	primiparity;m_bmiincl;m_hbincl;ga_days_incl;GWG;w_age;m_heightincl;m_muacincl	FALSE
UBA5446.sp004553625	Tri2, mother	Pre+Postnatal	0			0
Unknown_UBA10281	Tri2, mother	Pre+Postnatal	3.86835e-05	-0.000371279	0.000448646	4	0.848648	0.942788	primiparity;m_bmiincl;m_hbincl;ga_days_incl;GWG;w_age;m_heightincl;m_muacincl	FALSE
Unknown_Desulfovibrio	Tri2, mother	Pre+Postnatal	0.000307518	-0.000439081	0.00105412	4	0.407696	0.806363	primiparity;m_bmiincl;m_hbincl;ga_days_incl;GWG;w_age;m_muacincl	FALSE
Unknown_RUG806	Tri2, mother	Pre+Postnatal	0.00019964	-8.87116e-05	0.000487992	4	0.167894	0.73443	primiparity;m_bmiincl;m_hbincl;ga_days_incl;GWG;w_age;m_heightincl;m_muacincl	FALSE
V9D3004.sp002349525	Tri2, mother	Pre+Postnatal	0.000216319	-0.000973726	0.00140636	4	0.713878	0.902872	m_bmiincl;m_hbincl;GWG;w_age;m_heightincl;m_muacincl	FALSE
Veillonella.sp900545205	Tri2, mother	Pre+Postnatal	0			0
UBA1436.sp002329395	Tri2, mother	Pre+Postnatal	0.000330443	-0.000209696	0.000870581	4	0.222023	0.73443	primiparity;m_hbincl;GWG;w_age;m_heightincl;m_muacincl	FALSE
Unknown_CAG.452	Tri2, mother	Pre+Postnatal	0.00010036	-0.00024897	0.00044969	4	0.562858	0.853105	primiparity;m_bmiincl;GWG;w_age;m_heightincl;m_muacincl	FALSE
UMGS911.sp900545935	Tri2, mother	Pre+Postnatal	-0.000310651	-0.000608921	-1.23803e-05	-4	0.0416924	0.73443	primiparity;m_bmiincl;ga_days_incl;m_heightincl;m_muacincl	TRUE
Unknown_UBA1259	Tri2, mother	Pre+Postnatal	5.34836e-05	-0.000116012	0.000222979	4	0.52596	0.842261	primiparity;m_bmiincl;ga_days_incl;GWG	FALSE
Prevotella.bivia	Tri2, mother	Pre+Postnatal	0			0
Ruminococcus_A.sp000437095	Tri2, mother	Pre+Postnatal	1.23754e-05	-4.36003e-05	6.8351e-05	2.26901	0.655795	0.890501	primiparity;m_bmiincl;m_hbincl;w_age;m_heightincl;m_muacincl	FALSE
Pauljensenia.sp900541895	Tri2, mother	Pre+Postnatal	0			0
UBA5026.sp900557305	Tri2, mother	Pre+Postnatal	0.000211467	-4.43611e-05	0.000467295	4	0.102154	0.73443	primiparity;m_bmiincl;m_hbincl;m_heightincl;m_muacincl	FALSE
Unknown_UBA3789	Tri2, mother	Pre+Postnatal	0.000128853	-2.72374e-05	0.000284944	4	0.1025	0.73443	primiparity;m_hbincl;ga_days_incl;w_age;m_heightincl;m_muacincl	FALSE
Roseburia.sp003470905	Tri2, mother	Pre+Postnatal	0.000136668	-2.46834e-05	0.000298019	4	0.0942755	0.73443	primiparity;m_bmiincl;m_hbincl;GWG;m_muacincl	FALSE
Catenibacterium.sp900540685	Tri2, mother	Pre+Postnatal	-3.20888e-05	-0.000147776	8.35985e-05	-4	0.575663	0.863954	primiparity;m_bmiincl;m_hbincl;ga_days_incl;GWG;w_age;m_heightincl;m_muacincl	FALSE
UBA9732.sp001940825	Tri2, mother	Pre+Postnatal	-0.000416276	-0.00135178	0.000519233	-4	0.371129	0.768075	primiparity;m_bmiincl;m_hbincl;ga_days_incl;GWG;w_age;m_heightincl;m_muacincl	FALSE
Unknown_UBA5364	Tri2, mother	Pre+Postnatal	0.000382884	-0.000275886	0.00104165	4	0.245465	0.743284	primiparity;m_hbincl;GWG;w_age;m_heightincl;m_muacincl	FALSE
Agathobacter.sp900549895	Tri2, mother	Pre+Postnatal	-0.000443037	-0.00094475	5.86766e-05	-4	0.0814409	0.73443	primiparity;m_bmiincl;m_hbincl;ga_days_incl;GWG;w_age;m_heightincl;m_muacincl	FALSE
Schleiferilactobacillus.harbinensis	Tri2, mother	Pre+Postnatal	0			0
Odoribacter.splanchnicus	Tri2, mother	Pre+Postnatal	-0.000526259	-0.00196085	0.000908334	-4	0.460751	0.814039	primiparity;m_bmiincl;m_hbincl;ga_days_incl;w_age;m_muacincl	FALSE
Unknown_UMGS1696	Tri2, mother	Pre+Postnatal	-0.000404671	-0.000784249	-2.50937e-05	-4	0.037409	0.73443	primiparity;m_bmiincl;ga_days_incl;GWG;w_age;m_heightincl;m_muacincl	TRUE
UMGS1052.sp900548115	Tri2, mother	Pre+Postnatal	-1.22899e-05	-0.000411879	0.000387299	-2.25333	0.950436	0.978648	primiparity;m_hbincl;ga_days_incl;GWG;w_age;m_heightincl;m_muacincl	FALSE
CAG.452.sp000434035	Tri2, mother	Pre+Postnatal	-0.000118839	-0.000287831	5.01534e-05	-4	0.161914	0.73443	m_bmiincl;m_hbincl;ga_days_incl;GWG;m_heightincl;m_muacincl	FALSE
Pediococcus.acidilactici	Tri2, mother	Pre+Postnatal	0			0
Limosilactobacillus.mucosae	Tri2, mother	Pre+Postnatal	0			0
Ruminococcus_E.bromii_A	Tri2, mother	Pre+Postnatal	0			0
Unknown_SFFS01	Tri2, mother	Pre+Postnatal	-6.31626e-06	-0.000302951	0.000290318	-1.15808	0.965639	0.985236	primiparity;m_bmiincl;m_hbincl;ga_days_incl;GWG;w_age;m_heightincl;m_muacincl	FALSE
Faecalimonas.nexilis	Tri2, mother	Pre+Postnatal	6.67828e-05	-4.10045e-05	0.00017457	4	0.216557	0.73443	primiparity;m_hbincl;GWG;w_age;m_heightincl	FALSE
UBA1829.sp900549045	Tri2, mother	Pre+Postnatal	0.000202713	-3.19133e-06	0.000408618	4	0.0534495	0.73443	primiparity;m_bmiincl;m_hbincl;w_age;m_heightincl;m_muacincl	FALSE
Unknown_UBA7642	Tri2, mother	Pre+Postnatal	-1.88199e-05	-4.88033e-05	1.11636e-05	-3.4506	0.210747	0.73443	m_bmiincl;GWG;w_age;m_heightincl;m_muacincl	FALSE
UMGS1976.sp900556765	Tri2, mother	Pre+Postnatal	0.000760139	-0.000395059	0.00191534	4	0.189333	0.73443	primiparity;m_bmiincl;m_hbincl;ga_days_incl;GWG;w_age;m_heightincl;m_muacincl	FALSE
Unknown_CAG.632	Tri2, mother	Pre+Postnatal	-0.000276149	-0.000589956	3.76584e-05	-4	0.0825744	0.73443	primiparity;m_hbincl;ga_days_incl;GWG;w_age;m_heightincl	FALSE
Firm.11.sp900548145	Tri2, mother	Pre+Postnatal	0.000391673	-0.000240242	0.00102359	4	0.215882	0.73443	primiparity;m_hbincl;ga_days_incl;GWG;w_age;m_heightincl;m_muacincl	FALSE
UBA5026.sp900546745	Tri2, mother	Pre+Postnatal	0.000111201	-1.40207e-05	0.000236422	4	0.0799858	0.73443	primiparity;m_bmiincl;m_hbincl;GWG;m_heightincl	FALSE
CAG.603.sp900066105	Tri2, mother	Pre+Postnatal	0.000536605	-0.000391094	0.0014643	4	0.247399	0.743284	primiparity;m_bmiincl;m_hbincl;ga_days_incl;GWG;m_heightincl;m_muacincl	FALSE
CAG.127.sp900319515	Tri2, mother	Pre+Postnatal	-0.000265866	-0.00125997	0.000728238	-4	0.589345	0.871631	primiparity;m_bmiincl;m_hbincl;ga_days_incl;GWG;w_age;m_heightincl;m_muacincl	FALSE
CAG.313.sp003539625	Tri2, mother	Pre+Postnatal	9.73743e-05	-3.63811e-05	0.00023113	4	0.148219	0.73443	primiparity;m_bmiincl;m_hbincl;m_heightincl;m_muacincl	FALSE
CAG.632.sp000431515	Tri2, mother	Pre+Postnatal	-8.82065e-05	-0.000205193	2.87803e-05	-4	0.134563	0.73443	m_bmiincl;m_hbincl;ga_days_incl;GWG;m_heightincl;m_muacincl	FALSE
Unknown_Streptococcus	Tri2, mother	Pre+Postnatal	0			0
Bacteroides.stercoris	Tri2, mother	Pre+Postnatal	0			0
Parolsenella.sp900552935	Tri2, mother	Pre+Postnatal	0			0
CAG.269.sp900554175	Tri2, mother	Pre+Postnatal	-3.08977e-05	-0.000174427	0.000112632	-4	0.663673	0.892326	primiparity;m_bmiincl;m_hbincl;ga_days_incl;GWG;w_age;m_heightincl;m_muacincl	FALSE
Neisseria.sp000186165	Tri2, mother	Pre+Postnatal	0			0
Oscillibacter.sp900550685	Tri2, mother	Pre+Postnatal	0.000137608	-0.000352745	0.000627961	4	0.571214	0.862391	primiparity;m_bmiincl;m_hbincl;ga_days_incl;GWG;w_age;m_heightincl;m_muacincl	FALSE
Unknown_Porphyromonas	Tri2, mother	Pre+Postnatal	0			0
UBA5026.sp900550255	Tri2, mother	Pre+Postnatal	-4.21214e-05	-0.000107409	2.31664e-05	-4	0.198136	0.73443	primiparity;m_bmiincl;m_hbincl;ga_days_incl;GWG;w_age;m_muacincl	FALSE
Unknown_UMGS1883_1	Tri2, mother	Pre+Postnatal	8.2129e-05	-3.22287e-05	0.000196487	4	0.153763	0.73443	primiparity;m_hbincl;w_age;m_heightincl	FALSE
CAG.841.sp900544285	Tri2, mother	Pre+Postnatal	-0.000639883	-0.00120067	-7.90953e-05	-4	0.0265816	0.73443	primiparity;ga_days_incl;GWG;w_age;m_heightincl;m_muacincl	TRUE
Unknown_CAG.1000_2	Tri2, mother	Pre+Postnatal	-3.04308e-05	-0.000700621	0.00063976	-4	0.926812	0.972901	primiparity;m_bmiincl;m_hbincl;ga_days_incl;GWG;w_age;m_heightincl;m_muacincl	FALSE
SFHK01.sp004556395	Tri2, mother	Pre+Postnatal	-0.000190073	-0.000945238	0.000565091	-4	0.612003	0.872968	primiparity;m_bmiincl;ga_days_incl;GWG;w_age;m_heightincl	FALSE
Unknown_Succinivibrio	Tri2, mother	Pre+Postnatal	-5.95529e-06	-6.9737e-05	5.78264e-05	-1.09189	0.850214	0.942788	primiparity;m_bmiincl;m_hbincl;ga_days_incl;GWG;w_age;m_heightincl;m_muacincl	FALSE
Unknown_CAG.582	Tri2, mother	Pre+Postnatal	6.85702e-05	-0.000731623	0.000868764	4	0.862397	0.949946	primiparity;m_bmiincl;m_hbincl;ga_days_incl;GWG;w_age;m_heightincl;m_muacincl	FALSE
Coprococcus.sp000154245	Tri2, mother	Pre+Postnatal	-9.09478e-05	-0.000285582	0.000103686	-4	0.347955	0.751571	primiparity;m_bmiincl;m_hbincl;ga_days_incl;GWG;w_age;m_heightincl;m_muacincl	FALSE
CAG.1000.sp900556025	Tri2, mother	Pre+Postnatal	9.9528e-05	-0.000211515	0.000410571	4	0.51882	0.842261	primiparity;m_bmiincl;m_hbincl;ga_days_incl;GWG;w_age;m_heightincl;m_muacincl	FALSE
UMGS902.sp003343845	Tri2, mother	Pre+Postnatal	0.000393494	-0.000136057	0.000923044	4	0.139776	0.73443	primiparity;m_bmiincl;m_hbincl;ga_days_incl;GWG;w_age;m_heightincl;m_muacincl	FALSE
Duodenibacillus.sp900544255	Tri2, mother	Pre+Postnatal	0.000665833	-0.000301127	0.00163279	4	0.170364	0.73443	primiparity;m_bmiincl;m_hbincl;ga_days_incl;GWG;w_age;m_muacincl	FALSE
Unknown_UBA1731	Tri2, mother	Pre+Postnatal	-9.63704e-05	-0.000296841	0.0001041	-4	0.335497	0.751571	m_bmiincl;m_hbincl;ga_days_incl;m_heightincl;m_muacincl	FALSE
Veillonella.sp003463825	Tri2, mother	Pre+Postnatal	0			0
UBA636.sp900546285	Tri2, mother	Pre+Postnatal	9.19873e-05	-0.000139137	0.000323111	4	0.424235	0.81213	primiparity;m_bmiincl;GWG;w_age;m_muacincl	FALSE
Unknown_Zag111	Tri2, mother	Pre+Postnatal	2.70259e-05	-5.84725e-05	0.000112524	4	0.52524	0.842261	primiparity;m_bmiincl;w_age;m_muacincl	FALSE
CAG.269.sp003525075	Tri2, mother	Pre+Postnatal	0.000603069	-0.00035757	0.00156371	4	0.210436	0.73443	primiparity;m_bmiincl;m_hbincl;GWG;w_age;m_muacincl	FALSE
Gemmiger.sp004555405	Tri2, mother	Pre+Postnatal	0.000567234	-0.000419535	0.001554	4	0.250572	0.748923	primiparity;m_bmiincl;m_hbincl;w_age;m_heightincl;m_muacincl	FALSE
UBA1777.sp003150355	Tri2, mother	Pre+Postnatal	6.70666e-05	-0.000303563	0.000437697	4	0.714861	0.902872	m_bmiincl;m_hbincl;ga_days_incl;GWG;w_age;m_heightincl;m_muacincl	FALSE
Haemophilus_D.parainfluenzae_J	Tri2, mother	Pre+Postnatal	0			0
Unknown_Firm.07	Tri2, mother	Pre+Postnatal	7.02447e-05	-1.54864e-05	0.000155976	4	0.105164	0.73443	primiparity;m_hbincl;w_age;m_muacincl	FALSE
Unknown_UMGS1585	Tri2, mother	Pre+Postnatal	0.000268057	-1.70747e-05	0.000553189	4	0.0644735	0.73443	primiparity;m_hbincl;ga_days_incl;GWG;w_age;m_heightincl;m_muacincl	FALSE
UBA1777.sp900549645	Tri2, mother	Pre+Postnatal	-4.86983e-05	-0.000529333	0.000431936	-4	0.837638	0.942601	primiparity;m_bmiincl;m_hbincl;ga_days_incl;GWG;w_age;m_heightincl;m_muacincl	FALSE
SFFH01.sp900542395	Tri2, mother	Pre+Postnatal	0.000500279	-0.00022229	0.00122285	4	0.167886	0.73443	primiparity;m_bmiincl;m_hbincl;ga_days_incl;GWG;w_age;m_heightincl;m_muacincl	FALSE
Clostridium.sp900540255	Tri2, mother	Pre+Postnatal	-1.29602e-05	-8.25365e-05	5.66161e-05	-2.37623	0.706605	0.902872	primiparity;m_bmiincl;m_hbincl;ga_days_incl;GWG;w_age;m_heightincl;m_muacincl	FALSE
Unknown_UMGS1663	Tri2, mother	Pre+Postnatal	-0.000475121	-0.00112918	0.000178934	-4	0.148554	0.73443	primiparity;m_bmiincl;m_hbincl;ga_days_incl;GWG;w_age;m_heightincl;m_muacincl	FALSE
Unknown_CAG.533	Tri2, mother	Pre+Postnatal	0.000142821	-0.000522526	0.000808168	4	0.66457	0.892326	primiparity;m_bmiincl;m_hbincl;ga_days_incl;GWG;w_age;m_heightincl;m_muacincl	FALSE
Unknown_UBA5578	Tri2, mother	Pre+Postnatal	-0.000107423	-0.000444335	0.000229489	-4	0.521355	0.842261	primiparity;m_bmiincl;w_age;m_heightincl;m_muacincl	FALSE
Unknown_F23.B02	Tri2, mother	Pre+Postnatal	-6.70049e-05	-0.000274387	0.000140377	-4	0.514783	0.842261	primiparity;m_bmiincl;m_hbincl;ga_days_incl;GWG;w_age;m_heightincl;m_muacincl	FALSE
Coprococcus.eutactus_A	Tri2, mother	Pre+Postnatal	-0.000153203	-0.00063933	0.000332925	-4	0.525837	0.842261	m_bmiincl;m_hbincl;ga_days_incl;GWG;w_age;m_muacincl	FALSE
CAG.272.sp000433515	Tri2, mother	Pre+Postnatal	-0.000236841	-0.000594415	0.000120733	-4	0.186511	0.73443	primiparity;m_bmiincl;m_hbincl;ga_days_incl;GWG;w_age;m_heightincl;m_muacincl	FALSE
UBA7597.sp003448195	Tri2, mother	Pre+Postnatal	7.3469e-05	1.45296e-05	0.000132408	4	0.0161273	0.73443	primiparity;m_bmiincl;m_hbincl;GWG;w_age;m_muacincl	TRUE
Lawsonibacter.sp900553135	Tri2, mother	Pre+Postnatal	0.000542293	-0.000332967	0.00141755	4	0.216557	0.73443	primiparity;m_hbincl;GWG;w_age;m_heightincl	FALSE
Unknown_Ruminiclostridium_E	Tri2, mother	Pre+Postnatal	0.000560254	-0.000312852	0.00143336	4	0.201191	0.73443	primiparity;m_hbincl;w_age;m_heightincl	FALSE
Lachnospira.sp000437735	Tri2, mother	Pre+Postnatal	0.000320734	2.41472e-05	0.00061732	4	0.0348139	0.73443	w_age;m_heightincl	TRUE
Holdemanella.sp900547815	Tri2, mother	Pre+Postnatal	-3.38007e-05	-0.000286123	0.000218521	-4	0.786504	0.929181	primiparity;m_bmiincl;m_hbincl;ga_days_incl;GWG;w_age;m_heightincl;m_muacincl	FALSE
Unknown_CAG.873	Tri2, mother	Pre+Postnatal	7.55691e-05	-0.000218764	0.000369902	4	0.604912	0.872968	primiparity;m_hbincl;ga_days_incl;GWG;w_age;m_muacincl	FALSE
Pauljensenia.turicensis	Tri2, mother	Pre+Postnatal	6.3133e-06	-7.88249e-06	2.05091e-05	1.15754	0.37246	0.768075	primiparity;m_bmiincl;m_hbincl;w_age;m_muacincl	FALSE
UMGS1781.sp004554705	Tri2, mother	Pre+Postnatal	9.04146e-05	-0.000726379	0.000907208	4	0.823502	0.938259	primiparity;m_hbincl;GWG;w_age	FALSE
Unknown_UMGS363	Tri2, mother	Pre+Postnatal	-0.000130621	-0.000903973	0.000642731	-4	0.732812	0.90849	primiparity;m_bmiincl;m_hbincl;ga_days_incl;GWG;w_age;m_heightincl;m_muacincl	FALSE
UMGS1532.sp900552605	Tri2, mother	Pre+Postnatal	0.000300449	-0.000226087	0.000826986	4	0.253708	0.748923	primiparity;m_bmiincl;m_hbincl;GWG;w_age;m_heightincl;m_muacincl	FALSE
Unknown_CAG.977	Tri2, mother	Pre+Postnatal	0.000664501	-0.000350818	0.00167982	4	0.19256	0.73443	primiparity;m_hbincl;GWG;w_age	FALSE
Veillonella.sp900549845	Tri2, mother	Pre+Postnatal	0			0
Pauljensenia.sp000411415	Tri2, mother	Pre+Postnatal	0			0
Bacteroides.bouchesdurhonensis	Tri2, mother	Pre+Postnatal	0.000370888	-0.000557314	0.00129909	4	0.422076	0.81213	primiparity;m_bmiincl;GWG;w_age;m_heightincl;m_muacincl	FALSE
Eubacterium_R.sp900548085	Tri2, mother	Pre+Postnatal	-0.000109022	-0.000330373	0.000112328	-4	0.322901	0.751571	primiparity;m_bmiincl;m_hbincl;ga_days_incl;GWG;w_age;m_heightincl;m_muacincl	FALSE
Unknown_CAG.884	Tri2, mother	Pre+Postnatal	0.00015555	-0.000177053	0.000488152	4	0.348273	0.751571	primiparity;m_bmiincl;m_hbincl;w_age;m_heightincl;m_muacincl	FALSE
UMGS1225.sp900549725	Tri2, mother	Pre+Postnatal	1.61387e-05	-0.000327075	0.000359353	2.95901	0.924215	0.971053	primiparity;m_bmiincl;m_hbincl;ga_days_incl;GWG;w_age;m_heightincl;m_muacincl	FALSE
Ruminiclostridium_E.sp003512525	Tri2, mother	Pre+Postnatal	0			0
CAG.762.sp000432575	Tri2, mother	Pre+Postnatal	0.000107578	-2.49917e-05	0.000240148	4	0.108009	0.73443	primiparity;m_bmiincl;m_hbincl;ga_days_incl;GWG;w_age;m_heightincl;m_muacincl	FALSE
Unknown_Megasphaera	Tri2, mother	Pre+Postnatal	-8.35627e-05	-0.000726462	0.000559336	-4	0.792694	0.933256	primiparity;m_bmiincl;m_hbincl;ga_days_incl;GWG;w_age;m_heightincl;m_muacincl	FALSE
Clostridium_Q.saccharolyticum_A	Tri2, mother	Pre+Postnatal	0			0
CAG.964.sp000435335	Tri2, mother	Pre+Postnatal	0.000119536	-9.55442e-05	0.000334617	4	0.265691	0.748923	primiparity;m_bmiincl;m_hbincl;ga_days_incl;GWG;w_age;m_heightincl;m_muacincl	FALSE
Unknown_UBA2821	Tri2, mother	Pre+Postnatal	9.16276e-05	-3.68929e-05	0.000220148	4	0.156361	0.73443	primiparity;m_bmiincl;m_hbincl;w_age;m_heightincl;m_muacincl	FALSE
Alistipes_A.sp900240235	Tri2, mother	Pre+Postnatal	-0.000286453	-0.00113264	0.000559732	-4	0.495448	0.834743	primiparity;m_bmiincl;ga_days_incl;GWG;w_age;m_heightincl;m_muacincl	FALSE
Unknown_CAG.302_2	Tri2, mother	Pre+Postnatal	0.000303732	-0.000292217	0.00089968	4	0.30663	0.751571	primiparity;m_bmiincl;m_hbincl;ga_days_incl;GWG;w_age;m_heightincl;m_muacincl	FALSE
Unknown_Eubacterium_F	Tri2, mother	Pre+Postnatal	-0.000382428	-0.00118267	0.000417816	-4	0.337273	0.751571	primiparity;m_bmiincl;m_hbincl;ga_days_incl;GWG;w_age;m_heightincl;m_muacincl	FALSE
Unknown_Rikenellaceae	Tri2, mother	Pre+Postnatal	-0.000193269	-0.000574031	0.000187492	-4	0.308924	0.751571	primiparity;m_bmiincl;m_hbincl;GWG;w_age;m_heightincl;m_muacincl	FALSE
CAG.460.sp000437315	Tri2, mother	Pre+Postnatal	-3.38708e-06	-0.000485929	0.000479155	-0.621017	0.988681	0.995203	primiparity;m_bmiincl;ga_days_incl;GWG;w_age;m_heightincl;m_muacincl	FALSE
Unknown_UBA9475	Tri2, mother	Pre+Postnatal	0.000245582	-0.000367588	0.000858752	4	0.421002	0.81213	primiparity;m_bmiincl;m_hbincl;GWG;w_age;m_heightincl	FALSE
UBA1829.sp900548385	Tri2, mother	Pre+Postnatal	0			0
Unknown_UBA11963	Tri2, mother	Pre+Postnatal	0.000111475	4.97225e-06	0.000217977	4	0.0407463	0.73443	primiparity;m_hbincl;ga_days_incl;GWG;w_age	TRUE
Unknown_UBA6857	Tri2, mother	Pre+Postnatal	1.95628e-05	-0.000175219	0.000214345	3.58682	0.839346	0.942601	primiparity;m_hbincl;ga_days_incl;GWG;w_age;m_heightincl	FALSE
UMGS1668.sp900553955	Tri2, mother	Pre+Postnatal	0.000209869	-0.000764856	0.00118459	4	0.664202	0.892326	primiparity;m_bmiincl;ga_days_incl;GWG;w_age;m_heightincl	FALSE
CAG.877.sp000433455	Tri2, mother	Pre+Postnatal	-0.000112444	-0.000476221	0.000251332	-4	0.534088	0.848416	primiparity;m_bmiincl;ga_days_incl;GWG;m_heightincl	FALSE
Unknown_CAG.462	Tri2, mother	Pre+Postnatal	7.82496e-05	-7.45689e-05	0.000231068	4	0.304414	0.751571	primiparity;m_bmiincl;m_hbincl;ga_days_incl;GWG;w_age;m_heightincl;m_muacincl	FALSE
Unknown_Alistipes	Tri2, mother	Pre+Postnatal	0.000488971	-0.000300227	0.00127817	4	0.216557	0.73443	primiparity;m_hbincl;GWG;w_age;m_heightincl	FALSE
Brachyspira.pilosicoli	Tri2, mother	Pre+Postnatal	7.51879e-05	-3.10592e-05	0.000181435	4	0.159531	0.73443	primiparity;m_bmiincl;m_hbincl;w_age;m_heightincl	FALSE
UBA4951.sp900540385	Tri2, mother	Pre+Postnatal	3.44771e-05	-0.00021143	0.000280384	4	0.777238	0.923998	primiparity;m_hbincl;ga_days_incl;w_age;m_heightincl;m_muacincl	FALSE
Unknown_Bilophila	Tri2, mother	Pre+Postnatal	-0.000642659	-0.00151738	0.000232061	-4	0.144135	0.73443	primiparity;m_bmiincl;m_hbincl;ga_days_incl;GWG;w_age;m_heightincl;m_muacincl	FALSE
Enterococcus_A.raffinosus	Tri2, mother	Pre+Postnatal	0			0
Unknown_Victivallis	Tri2, mother	Pre+Postnatal	-0.000116188	-0.000357883	0.000125507	-4	0.335497	0.751571	m_bmiincl;m_hbincl;ga_days_incl;m_heightincl;m_muacincl	FALSE
Unknown_CAG.1782	Tri2, mother	Pre+Postnatal	1.88439e-06	-1.51389e-05	1.89077e-05	0.3455	0.823502	0.938259	primiparity;m_hbincl;GWG;w_age	FALSE
UBA737.sp900549755	Tri2, mother	Pre+Postnatal	2.88775e-05	-0.000185911	0.000243666	4	0.786149	0.929181	primiparity;ga_days_incl;GWG;w_age;m_heightincl;m_muacincl	FALSE
Unknown_RF16	Tri2, mother	Pre+Postnatal	7.87133e-05	-6.851e-05	0.000225937	4	0.285429	0.751571	primiparity;m_bmiincl;w_age	FALSE
Agathobacter.sp900552085	Tri2, mother	Pre+Postnatal	0.000337421	-0.000545251	0.00122009	4	0.441899	0.812306	primiparity;m_bmiincl;m_hbincl;GWG;w_age;m_heightincl;m_muacincl	FALSE
Limosilactobacillus.vaginalis	Tri2, mother	Pre+Postnatal	0			0
Streptococcus.sp001556435	Tri2, mother	Pre+Postnatal	8.46922e-06	-0.00013789	0.000154828	1.55282	0.906908	0.967758	primiparity;m_bmiincl;m_hbincl;ga_days_incl;w_age;m_heightincl;m_muacincl	FALSE
CAG.170.sp900549635	Tri2, mother	Pre+Postnatal	0.00011252	-0.000198327	0.000423368	4	0.467	0.81657	primiparity;ga_days_incl;GWG;m_heightincl;m_muacincl	FALSE
UMGS172.sp900539855	Tri2, mother	Pre+Postnatal	-0.000555338	-0.00127619	0.000165515	-4	0.126821	0.73443	m_bmiincl;m_hbincl;w_age;m_muacincl	FALSE
UMGS1540.sp900552775	Tri2, mother	Pre+Postnatal	-0.000558905	-0.00128533	0.000167517	-4	0.127297	0.73443	primiparity;ga_days_incl;w_age;m_heightincl	FALSE
Streptococcus.infantarius	Tri2, mother	Pre+Postnatal	0.000532535	-0.000168213	0.00123328	4	0.131747	0.73443	primiparity;m_bmiincl;GWG;w_age;m_muacincl	FALSE
UBA3631.sp900546275	Tri2, mother	Pre+Postnatal	-2.90321e-05	-8.94248e-05	3.13606e-05	-4	0.335497	0.751571	m_bmiincl;m_hbincl;ga_days_incl;m_heightincl;m_muacincl	FALSE
Unknown_RUG705	Tri2, mother	Pre+Postnatal	-6.65477e-05	-0.000363747	0.000230652	-4	0.651397	0.889731	primiparity;m_bmiincl;m_hbincl;GWG;w_age;m_heightincl;m_muacincl	FALSE
CAG.1193.sp000436255	Tri2, mother	Pre+Postnatal	-4.1156e-05	-0.000128695	4.63826e-05	-4	0.345764	0.751571	primiparity;m_hbincl;ga_days_incl;GWG;w_age;m_heightincl	FALSE
CAG.611.sp000434175	Tri2, mother	Pre+Postnatal	-1.1531e-05	-0.000192461	0.000169399	-2.1142	0.897523	0.966047	primiparity;m_hbincl;ga_days_incl;GWG;w_age;m_heightincl;m_muacincl	FALSE
UMGS995.sp900547465	Tri2, mother	Pre+Postnatal	0.000346226	-0.00075228	0.00144473	4	0.525073	0.842261	primiparity;m_bmiincl;m_hbincl;ga_days_incl;GWG;w_age;m_heightincl;m_muacincl	FALSE
UBA11471.sp900542765	Tri2, mother	Pre+Postnatal	0.000458301	-0.000281396	0.001198	4	0.216557	0.73443	primiparity;m_hbincl;GWG;w_age;m_heightincl	FALSE
Enterocloster.bolteae	Tri2, mother	Pre+Postnatal	0			0
UMGS1590.sp900552455	Tri2, mother	Pre+Postnatal	0.000106649	-0.000348467	0.000561765	4	0.636055	0.882593	primiparity;m_bmiincl;m_hbincl;ga_days_incl;GWG;w_age;m_heightincl;m_muacincl	FALSE
Prevotella.sp900540415	Tri2, mother	Pre+Postnatal	0			0
Unknown_Gastranaerophilaceae	Tri2, mother	Pre+Postnatal	0.000363525	-0.000178956	0.000906005	4	0.182204	0.73443	primiparity;m_bmiincl;GWG;w_age;m_muacincl	FALSE
UBA737.sp002451855	Tri2, mother	Pre+Postnatal	-4.15022e-05	-0.000129626	4.66214e-05	-4	0.344948	0.751571	primiparity;m_bmiincl;m_hbincl;ga_days_incl;w_age;m_muacincl	FALSE
Parolsenella.uli_A	Tri2, mother	Pre+Postnatal	0			0
CAG.110.sp900544405	Tri2, mother	Pre+Postnatal	4.5581e-05	-0.000145426	0.000236588	4	0.630525	0.879682	primiparity;m_bmiincl;m_hbincl;ga_days_incl;GWG;w_age	FALSE
Enterobacter.bugandensis	Tri2, mother	Pre+Postnatal	-0.000114275	-0.000288429	5.98782e-05	-4	0.191014	0.73443	m_bmiincl;m_hbincl;ga_days_incl;GWG;m_heightincl;m_muacincl	FALSE
UBA7057.sp900542735	Tri2, mother	Pre+Postnatal	0.000660782	-6.09734e-05	0.00138254	4	0.0714733	0.73443	primiparity;m_hbincl;w_age;m_heightincl;m_muacincl	FALSE
Limosilactobacillus.oris	Tri2, mother	Pre+Postnatal	0			0
Butyricicoccus_A.sp002395695	Tri2, mother	Pre+Postnatal	-0.000282765	-0.00053982	-2.57106e-05	-4	0.0319578	0.73443	w_age	TRUE	FALSE	TRUE	0.928571
Unknown_Lachnospira	Tri2, mother	Pre+Postnatal	0.000145843	-0.000293365	0.00058505	4	0.503279	0.839521	primiparity;m_bmiincl;m_hbincl;ga_days_incl;GWG;w_age;m_heightincl;m_muacincl	FALSE
Unknown_UMGS1326	Tri2, mother	Pre+Postnatal	0.000209584	-0.000296359	0.000715527	4	0.404664	0.803103	primiparity;m_bmiincl;m_hbincl;ga_days_incl;GWG;w_age;m_heightincl;m_muacincl	FALSE
Veillonella_A.magna	Tri2, mother	Pre+Postnatal	0			0
CAG.302.sp900548425	Tri2, mother	Pre+Postnatal	1.04462e-05	-1.52042e-05	3.60967e-05	1.9153	0.413304	0.809581	primiparity;m_bmiincl;GWG;w_age;m_heightincl;m_muacincl	FALSE
CAG.269.sp001916065	Tri2, mother	Pre+Postnatal	-9.63798e-05	-0.000543769	0.000351009	-4	0.663443	0.892326	primiparity;m_bmiincl;m_hbincl;ga_days_incl;GWG;w_age;m_heightincl;m_muacincl	FALSE
Unknown_UMGS1217	Tri2, mother	Pre+Postnatal	0.000376027	9.86719e-05	0.000653381	4	0.0094	0.73443	primiparity;m_bmiincl;m_hbincl;GWG;w_age;m_heightincl	TRUE
Unknown_TF01.11	Tri2, mother	Pre+Postnatal	-0.000165547	-0.000680865	0.000349772	-4	0.517175	0.842261	primiparity;m_bmiincl;m_hbincl;ga_days_incl;GWG;w_age;m_heightincl;m_muacincl	FALSE
UMGS1815.sp900550625	Tri2, mother	Pre+Postnatal	4.69179e-05	-0.000450525	0.000544361	4	0.848862	0.942788	primiparity;m_bmiincl;m_hbincl;ga_days_incl;GWG;w_age;m_muacincl	FALSE
Unknown_CAG.475	Tri2, mother	Pre+Postnatal	2.08038e-06	-6.10709e-05	6.52317e-05	0.381434	0.946918	0.977569	primiparity;m_bmiincl;m_hbincl;GWG;w_age;m_heightincl;m_muacincl	FALSE
CAG.273.sp000435755	Tri2, mother	Pre+Postnatal	-0.000163456	-0.000533581	0.00020667	-4	0.375773	0.770799	primiparity;m_bmiincl;w_age;m_heightincl;m_muacincl	FALSE
Limosilactobacillus.fermentum	Tri2, mother	Pre+Postnatal	0			0
CAG.312.sp002437405	Tri2, mother	Pre+Postnatal	0.000215379	-3.02072e-05	0.000460965	4	0.0835776	0.73443	primiparity;m_bmiincl;m_hbincl;GWG;w_age;m_muacincl	FALSE
Lachnospira.sp003537285	Tri2, mother	Pre+Postnatal	-0.000360935	-0.00114368	0.000421813	-4	0.354988	0.759007	m_hbincl;ga_days_incl;GWG;w_age;m_heightincl;m_muacincl	FALSE
CAG.269.sp000438255	Tri2, mother	Pre+Postnatal	7.06137e-05	-6.46765e-05	0.000205904	4	0.296296	0.751571	primiparity;m_bmiincl;GWG;w_age;m_muacincl	FALSE
Unknown_UMGS1045	Tri2, mother	Pre+Postnatal	4.62925e-05	-0.000150976	0.000243561	4	0.635898	0.882593	primiparity;m_bmiincl;m_hbincl;GWG;w_age;m_heightincl;m_muacincl	FALSE
Unknown_Lawsonibacter	Tri2, mother	Pre+Postnatal	-0.000200284	-0.00110825	0.00070768	-4	0.656792	0.890812	m_bmiincl;m_hbincl;ga_days_incl;GWG;m_heightincl	FALSE
Akkermansia.sp001580195	Tri2, mother	Pre+Postnatal	0.000421988	-0.0002591	0.00110308	4	0.216557	0.73443	primiparity;m_hbincl;GWG;w_age;m_heightincl	FALSE
Unknown_CAG.628	Tri2, mother	Pre+Postnatal	-6.05515e-05	-0.00023534	0.000114237	-4	0.485128	0.828702	primiparity;m_bmiincl;m_hbincl;ga_days_incl;GWG;w_age;m_heightincl;m_muacincl	FALSE
Butyricimonas.virosa	Tri2, mother	Pre+Postnatal	-8.02084e-05	-0.000234515	7.40984e-05	-4	0.297621	0.751571	primiparity;m_bmiincl;m_hbincl;ga_days_incl;w_age;m_heightincl;m_muacincl	FALSE
Victivallis.sp002998355	Tri2, mother	Pre+Postnatal	9.99856e-05	-4.22405e-05	0.000242212	4	0.162391	0.73443	primiparity;m_bmiincl;GWG;w_age	FALSE
Blautia_A.obeum	Tri2, mother	Pre+Postnatal	5.22799e-06	-9.95856e-05	0.000110042	0.958545	0.919627	0.969759	primiparity;m_bmiincl;m_hbincl;ga_days_incl;GWG;w_age;m_heightincl;m_muacincl	FALSE
UBA10281.sp900548285	Tri2, mother	Pre+Postnatal	0.000195211	-3.00568e-05	0.000420478	4	0.0871504	0.73443	primiparity;m_bmiincl;GWG;w_age;m_heightincl;m_muacincl	FALSE
CAG.312.sp900546565	Tri2, mother	Pre+Postnatal	5.04672e-05	-0.000121436	0.000222371	4	0.55439	0.851959	primiparity;m_bmiincl;GWG;w_age;m_heightincl;m_muacincl	FALSE
CAG.882.sp003486385	Tri2, mother	Pre+Postnatal	0.00044845	-0.00018421	0.00108111	4	0.159032	0.73443	primiparity;m_bmiincl;GWG;m_heightincl	FALSE
Unknown_UMGS1491	Tri2, mother	Pre+Postnatal	3.83618e-06	-0.000207587	0.000215259	0.703358	0.970775	0.987791	m_bmiincl;m_hbincl;ga_days_incl;GWG;w_age;m_heightincl	FALSE
Unknown_Oscillospiraceae	Tri2, mother	Pre+Postnatal	0.000109071	-0.000727944	0.000946087	4	0.792379	0.933256	primiparity;m_bmiincl;m_hbincl;ga_days_incl;GWG;w_age;m_muacincl	FALSE
CAG.245.sp900552135	Tri2, mother	Pre+Postnatal	0.000634067	-8.9156e-05	0.00135729	4	0.0836074	0.73443	primiparity;m_bmiincl;m_hbincl;GWG;w_age;m_heightincl;m_muacincl	FALSE
CAG.269.sp900556695	Tri2, mother	Pre+Postnatal	-0.000111706	-0.000348269	0.000124858	-4	0.342969	0.751571	primiparity;m_bmiincl;m_hbincl;ga_days_incl;GWG;w_age;m_heightincl;m_muacincl	FALSE
Unknown_Clostridium	Tri2, mother	Pre+Postnatal	-4.63163e-05	-0.000116902	2.42689e-05	-4	0.191014	0.73443	m_bmiincl;m_hbincl;ga_days_incl;GWG;m_heightincl;m_muacincl	FALSE
Unknown_Slackia_A	Tri2, mother	Pre+Postnatal	2.20621e-05	-0.000110879	0.000155003	4	0.737543	0.909976	primiparity;m_bmiincl;m_hbincl;ga_days_incl;GWG;m_heightincl;m_muacincl	FALSE
Unknown_Angelakisella	Tri2, mother	Pre+Postnatal	-7.28813e-05	-0.000581333	0.00043557	-4	0.772192	0.921392	primiparity;m_bmiincl;ga_days_incl;GWG;w_age;m_heightincl;m_muacincl	FALSE
UMGS1663.sp900553405	Tri2, mother	Pre+Postnatal	-8.43782e-05	-0.000424051	0.000255295	-4	0.616935	0.872968	primiparity;m_bmiincl;GWG;w_age;m_heightincl	FALSE
UBA6984.sp003258725	Tri2, mother	Pre+Postnatal	0.000445713	-7.39611e-05	0.000965388	4	0.0903703	0.73443	primiparity;m_hbincl;GWG;w_age;m_muacincl	FALSE
Unknown_Zag1	Tri2, mother	Pre+Postnatal	-3.45798e-05	-0.000582699	0.000513539	-4	0.898648	0.966047	primiparity;m_bmiincl;GWG;w_age;m_heightincl;m_muacincl	FALSE
Unknown_Ruminococcaceae	Tri2, mother	Pre+Postnatal	0.000105126	-0.000192148	0.0004024	4	0.476167	0.827496	primiparity;m_bmiincl;m_hbincl;ga_days_incl;GWG;w_age;m_heightincl;m_muacincl	FALSE
Phascolarctobacterium_A.succinatutens_A	Tri2, mother	Pre+Postnatal	0.000766511	-1.69954e-05	0.00155002	4	0.0548932	0.73443	primiparity;m_bmiincl;GWG;m_heightincl;m_muacincl	FALSE
UBA5905.sp004558485	Tri2, mother	Pre+Postnatal	-2.71981e-05	-0.000427892	0.000373496	-4	0.89079	0.962592	primiparity;m_bmiincl;m_hbincl;ga_days_incl;GWG;w_age;m_heightincl;m_muacincl	FALSE
CAG.110.sp900549705	Tri2, mother	Pre+Postnatal	0.000271418	-0.000380843	0.000923679	4	0.403658	0.802477	primiparity;m_bmiincl;w_age;m_heightincl;m_muacincl	FALSE
UMGS911.sp900546695	Tri2, mother	Pre+Postnatal	-3.2611e-05	-0.000250245	0.000185023	-4	0.762388	0.915339	primiparity;m_bmiincl;GWG;w_age;m_heightincl;m_muacincl	FALSE
Unknown_CAG.882	Tri2, mother	Pre+Postnatal	0.000242922	-0.000180981	0.000666826	4	0.252289	0.748923	primiparity;m_bmiincl;GWG;w_age;m_muacincl	FALSE
Unknown_UMGS75	Tri2, mother	Pre+Postnatal	6.5289e-05	-9.76723e-05	0.00022825	4	0.420853	0.81213	primiparity;m_bmiincl;m_hbincl;w_age;m_heightincl;m_muacincl	FALSE
CAG.83.sp000431575	Tri2, mother	Pre+Postnatal	-6.55969e-05	-0.000592416	0.000461222	-4	0.801586	0.936259	m_bmiincl;m_hbincl;ga_days_incl;w_age;m_heightincl;m_muacincl	FALSE
TF01.11.sp003524945	Tri2, mother	Pre+Postnatal	2.18302e-05	-0.000160406	0.000204066	4	0.808784	0.938259	primiparity;m_bmiincl;m_hbincl;GWG;w_age;m_heightincl;m_muacincl	FALSE
Lachnospira.sp000436475	Tri2, mother	Pre+Postnatal	0.00010155	-0.00026941	0.000472511	4	0.580639	0.867131	primiparity;m_bmiincl;m_hbincl;ga_days_incl;GWG;w_age;m_heightincl;m_muacincl	FALSE
Unknown_UBA4626	Tri2, mother	Pre+Postnatal	-2.63343e-05	-0.000383937	0.000331268	-4	0.881704	0.960462	primiparity;m_bmiincl;m_hbincl;GWG;w_age;m_heightincl;m_muacincl	FALSE
UBA4717.sp002404395	Tri2, mother	Pre+Postnatal	0.000553916	-3.20626e-05	0.00113989	4	0.0630694	0.73443	primiparity;m_bmiincl;m_hbincl;ga_days_incl;GWG;w_age;m_heightincl;m_muacincl	FALSE
Enterocloster.sp900540675	Tri2, mother	Pre+Postnatal	0			0
Enterobacter.sichuanensis	Tri2, mother	Pre+Postnatal	-9.58224e-05	-0.000239563	4.79187e-05	-4	0.183999	0.73443	m_bmiincl;m_hbincl;ga_days_incl;GWG;w_age;m_heightincl;m_muacincl	FALSE
Veillonella.sp900550175	Tri2, mother	Pre+Postnatal	0			0
Mediterraneibacter.lactaris	Tri2, mother	Pre+Postnatal	-9.22387e-05	-0.000278994	9.45161e-05	-4	0.32194	0.751571	primiparity;m_bmiincl;m_hbincl;ga_days_incl;GWG;w_age;m_muacincl	FALSE
Unknown_CAG.841	Tri2, mother	Pre+Postnatal	-0.000264066	-0.000813378	0.000285246	-4	0.335497	0.751571	m_bmiincl;m_hbincl;ga_days_incl;m_heightincl;m_muacincl	FALSE
UMGS882.sp900546385	Tri2, mother	Pre+Postnatal	-0.00010967	-0.000333885	0.000114545	-4	0.326568	0.751571	primiparity;m_bmiincl;m_hbincl;ga_days_incl;w_age;m_heightincl;m_muacincl	FALSE
Unknown_UMGS882	Tri2, mother	Pre+Postnatal	0.000228426	-0.000356526	0.000813379	4	0.433849	0.81213	primiparity;GWG	FALSE
UMGS363.sp900543105	Tri2, mother	Pre+Postnatal	2.82317e-05	-0.00047413	0.000530593	4	0.909579	0.968847	primiparity;m_bmiincl;m_hbincl;ga_days_incl;w_age;m_heightincl;m_muacincl	FALSE
Enterobacter.chengduensis	Tri2, mother	Pre+Postnatal	0			0
F23.B02.sp004553495	Tri2, mother	Pre+Postnatal	0			0
CAG.433.sp000433675	Tri2, mother	Pre+Postnatal	-6.91007e-05	-0.000376462	0.000238261	-4	0.650382	0.889731	primiparity;ga_days_incl;GWG;w_age;m_heightincl;m_muacincl	FALSE
Unknown_D5	Tri2, mother	Pre+Postnatal	3.48731e-05	-4.74822e-06	7.44944e-05	4	0.0826821	0.73443	primiparity;w_age;m_muacincl	FALSE
Agathobaculum.sp003481705	Tri2, mother	Pre+Postnatal	-0.000135915	-0.000716324	0.000444494	-4	0.636288	0.882593	primiparity;m_bmiincl;m_hbincl;ga_days_incl;GWG;w_age;m_heightincl;m_muacincl	FALSE
RUG131.sp900315885	Tri2, mother	Pre+Postnatal	-9.47984e-05	-0.000721952	0.000532355	-4	0.760575	0.915227	primiparity;m_hbincl;GWG;w_age;m_muacincl	FALSE
Gemmiger.variabilis_B	Tri2, mother	Pre+Postnatal	-1.47762e-06	-0.000335021	0.000332066	-0.270919	0.992849	0.997143	primiparity;m_bmiincl;m_hbincl;ga_days_incl;GWG;w_age;m_heightincl;m_muacincl	FALSE
Oscillibacter.sp900556925	Tri2, mother	Pre+Postnatal	0.000365058	-0.000224145	0.000954261	4	0.216557	0.73443	primiparity;m_hbincl;GWG;w_age;m_heightincl	FALSE
CAG.475.sp900548005	Tri2, mother	Pre+Postnatal	0			0
Unknown_Eubacterium_J	Tri2, mother	Pre+Postnatal	-0.000164497	-0.000734837	0.000405842	-4	0.560635	0.851959	primiparity;m_bmiincl;m_hbincl;ga_days_incl;GWG;w_age;m_heightincl;m_muacincl	FALSE
CAG.196.sp900553895	Tri2, mother	Pre+Postnatal	0.000386393	-0.000233063	0.00100585	4	0.2133	0.73443	primiparity;m_bmiincl;m_hbincl;GWG;w_age;m_muacincl	FALSE
UMGS1326.sp900550775	Tri2, mother	Pre+Postnatal	2.26109e-05	-6.87794e-05	0.000114001	4	0.618055	0.872968	primiparity;m_bmiincl;m_hbincl;GWG;w_age;m_muacincl	FALSE
Anaerotignum.sp000436415	Tri2, mother	Pre+Postnatal	6.93945e-05	-5.52553e-05	0.000194044	4	0.264898	0.748923	primiparity;m_bmiincl;m_hbincl;ga_days_incl;GWG;w_age;m_heightincl;m_muacincl	FALSE
UBA644.sp900547165	Tri2, mother	Pre+Postnatal	3.47391e-06	-0.000476216	0.000483163	0.636936	0.98831	0.995203	primiparity;m_bmiincl;m_hbincl;ga_days_incl;GWG;w_age;m_heightincl;m_muacincl	FALSE
Unknown_UMGS1840	Tri2, mother	Pre+Postnatal	3.76486e-05	-2.2557e-05	9.78541e-05	4	0.211922	0.73443	primiparity;m_bmiincl;ga_days_incl;GWG;w_age;m_heightincl;m_muacincl	FALSE
Unknown_CAG.273	Tri2, mother	Pre+Postnatal	-0.000189769	-0.000456628	7.70899e-05	-4	0.158171	0.73443	primiparity	FALSE
Unknown_CAG.590	Tri2, mother	Pre+Postnatal	-6.52575e-05	-0.000773843	0.000643328	-4	0.852234	0.943226	primiparity;m_bmiincl;m_hbincl;ga_days_incl;GWG;w_age;m_heightincl;m_muacincl	FALSE
UMGS363.sp900541495	Tri2, mother	Pre+Postnatal	-1.7008e-05	-5.20081e-05	1.7992e-05	-3.1184	0.330347	0.751571	m_bmiincl;ga_days_incl;w_age;m_heightincl;m_muacincl	FALSE
Unknown_UBA2730	Tri2, mother	Pre+Postnatal	5.85365e-05	-2.14163e-05	0.000138489	4	0.145999	0.73443	primiparity;m_bmiincl;GWG;w_age;m_muacincl	FALSE
UBA11512.sp003522145	Tri2, mother	Pre+Postnatal	-0.000122043	-0.00031218	6.80944e-05	-4	0.200379	0.73443	primiparity;m_bmiincl;m_hbincl;ga_days_incl;GWG;w_age;m_muacincl	FALSE
Agathobacter.sp900547695	Tri2, mother	Pre+Postnatal	-2.3377e-05	-0.000124456	7.77025e-05	-4	0.640455	0.885201	primiparity;m_bmiincl;m_hbincl;ga_days_incl;GWG;w_age;m_heightincl;m_muacincl	FALSE
Coprococcus.sp900548315	Tri2, mother	Pre+Postnatal	1.38645e-05	-1.06155e-05	3.83445e-05	2.54203	0.257193	0.748923	primiparity;m_bmiincl;m_hbincl;ga_days_incl;GWG;m_heightincl;m_muacincl	FALSE
UBA1206.sp000433115	Tri2, mother	Pre+Postnatal	5.78879e-05	-0.000339831	0.000455606	4	0.76856	0.919895	primiparity;m_bmiincl;m_hbincl;ga_days_incl;GWG;w_age;m_heightincl;m_muacincl	FALSE
Parolsenella.sp900544655	Tri2, mother	Pre+Postnatal	0			0
UBA7597.sp900542935	Tri2, mother	Pre+Postnatal	-8.55263e-06	-4.34614e-05	2.63561e-05	-1.56811	0.621469	0.872968	m_bmiincl;m_hbincl;GWG;w_age;m_heightincl;m_muacincl	FALSE
Unknown_CAG.710	Tri2, mother	Pre+Postnatal	-0.000404705	-0.000829597	2.01879e-05	-4	0.0612167	0.73443	primiparity;m_bmiincl;m_hbincl;ga_days_incl;GWG;w_age;m_muacincl	FALSE
QHMH01.sp003258795	Tri2, mother	Pre+Postnatal	0			0
Unknown_CAG.238	Tri2, mother	Pre+Postnatal	-4.97038e-05	-0.000575418	0.00047601	-4	0.848503	0.942788	primiparity;m_bmiincl;m_hbincl;ga_days_incl;GWG;w_age;m_muacincl	FALSE
Unknown_CAG.433_2	Tri2, mother	Pre+Postnatal	-6.6522e-05	-0.000183466	5.04215e-05	-4	0.255994	0.748923	m_bmiincl;m_hbincl;GWG;w_age	FALSE
UMGS2068.sp900557675	Tri2, mother	Pre+Postnatal	0.000223548	-1.11938e-05	0.00045829	4	0.0612821	0.73443	primiparity;m_bmiincl;m_hbincl;ga_days_incl;GWG;m_heightincl	FALSE
Fusobacterium_A.varium	Tri2, mother	Pre+Postnatal	0			0
CAG.628.sp000438415	Tri2, mother	Pre+Postnatal	-3.67924e-05	-0.000131214	5.76288e-05	-4	0.432818	0.81213	primiparity;m_bmiincl;m_hbincl;ga_days_incl;GWG;w_age;m_heightincl;m_muacincl	FALSE
CAG.533.sp900551105	Tri2, mother	Pre+Postnatal	0.00027549	-0.000229754	0.000780734	4	0.27466	0.751571	primiparity;m_bmiincl;m_hbincl;ga_days_incl;GWG;w_age;m_heightincl;m_muacincl	FALSE
CAG.878.sp000432255	Tri2, mother	Pre+Postnatal	6.44622e-05	-5.96486e-05	0.000188573	4	0.298625	0.751571	primiparity;m_bmiincl;ga_days_incl;GWG;w_age	FALSE
Unknown_CAG.492	Tri2, mother	Pre+Postnatal	0.00012537	-0.000347179	0.000597919	4	0.593286	0.871672	primiparity;m_hbincl;GWG;w_age;m_heightincl	FALSE
C941.sp900321725	Tri2, mother	Pre+Postnatal	0			0
UBA1829.sp900549415	Tri2, mother	Pre+Postnatal	-0.000365473	-0.000754532	2.35849e-05	-4	0.0646995	0.73443	primiparity;m_bmiincl;ga_days_incl;GWG;w_age;m_heightincl	FALSE
Lachnospira.sp900545725	Tri2, mother	Pre+Postnatal	-0.000133186	-0.000304476	3.81041e-05	-4	0.123329	0.73443	ga_days_incl;GWG;w_age;m_heightincl;m_muacincl	FALSE
Olsenella_E.provencensis	Tri2, mother	Pre+Postnatal	0			0
Holdemanella.sp003436425	Tri2, mother	Pre+Postnatal	0.000395611	-0.000254829	0.00104605	4	0.224392	0.73443	primiparity;m_bmiincl;m_hbincl;GWG;w_age;m_heightincl;m_muacincl	FALSE
Unknown_UMGS1668	Tri2, mother	Pre+Postnatal	-7.54624e-05	-0.000324969	0.000174044	-4	0.541842	0.850439	primiparity;m_bmiincl;m_hbincl;ga_days_incl;GWG;w_age;m_heightincl;m_muacincl	FALSE
Blautia_A.wexlerae	Tri2, mother	Pre+Postnatal	-4.60189e-05	-0.00021781	0.000125773	-4	0.589093	0.871631	primiparity;m_bmiincl;m_hbincl;ga_days_incl;w_age;m_heightincl;m_muacincl	FALSE
Unknown_CAG.611_1	Tri2, mother	Pre+Postnatal	0.000104562	-0.000184599	0.000393723	4	0.467115	0.81657	primiparity;m_bmiincl;m_hbincl;w_age;m_heightincl;m_muacincl	FALSE
Flavonifractor.sp900199495	Tri2, mother	Pre+Postnatal	0			0
Eubacterium_R.sp900539165	Tri2, mother	Pre+Postnatal	2.3124e-05	-1.00895e-06	4.72569e-05	4	0.0597816	0.73443	primiparity;m_hbincl;GWG;w_age;m_heightincl;m_muacincl	FALSE
Unknown_UBA733	Tri2, mother	Pre+Postnatal	-6.80913e-05	-0.00013231	-3.87237e-06	-4	0.0383694	0.73443	m_bmiincl;m_hbincl;ga_days_incl;w_age;m_heightincl;m_muacincl	TRUE
CAG.115.sp003507295	Tri2, mother	Pre+Postnatal	8.57829e-05	-0.000191463	0.000363029	4	0.533356	0.848416	primiparity;m_bmiincl;m_hbincl;w_age;m_heightincl;m_muacincl	FALSE
Actinomyces.urogenitalis	Tri2, mother	Pre+Postnatal	0			0
Unknown_UMGS1449	Tri2, mother	Pre+Postnatal	5.76305e-05	-2.79256e-05	0.000143187	4	0.179353	0.73443	primiparity;m_bmiincl;m_hbincl;ga_days_incl;GWG;w_age;m_heightincl;m_muacincl	FALSE
Unknown_Agathobaculum	Tri2, mother	Pre+Postnatal	1.56223e-05	-0.000136718	0.000167963	2.86432	0.8357	0.942601	primiparity;m_bmiincl;m_hbincl;ga_days_incl;GWG;w_age;m_heightincl;m_muacincl	FALSE
Unknown_UMGS1994	Tri2, mother	Pre+Postnatal	-0.00018428	-0.000425926	5.73651e-05	-4	0.130576	0.73443	m_hbincl;ga_days_incl;GWG;m_heightincl	FALSE
Unknown_UMGS1820	Tri2, mother	Pre+Postnatal	7.73516e-06	-2.72522e-05	4.27225e-05	1.41823	0.655795	0.890501	primiparity;m_bmiincl;m_hbincl;w_age;m_heightincl;m_muacincl	FALSE
Unknown_UMGS1322	Tri2, mother	Pre+Postnatal	8.9205e-05	-9.47291e-05	0.000273139	4	0.332152	0.751571	primiparity;w_age	FALSE
Desulfovibrio.piger_A	Tri2, mother	Pre+Postnatal	0			0
Haemophilus.influenzae	Tri2, mother	Pre+Postnatal	0			0
UMGS1585.sp900553205	Tri2, mother	Pre+Postnatal	-4.49012e-05	-9.73925e-05	7.59012e-06	-4	0.0909622	0.73443	primiparity;m_bmiincl;m_hbincl;ga_days_incl;GWG;w_age;m_heightincl;m_muacincl	FALSE
Morganella.morganii_B	Tri2, mother	Pre+Postnatal	0			0
CAG.110.sp003525905	Tri2, mother	Pre+Postnatal	-0.000120369	-0.000415204	0.000174466	-4	0.411411	0.809573	primiparity;m_bmiincl;m_hbincl;ga_days_incl;GWG;w_age;m_heightincl;m_muacincl	FALSE
CAG.884.sp000433875	Tri2, mother	Pre+Postnatal	-1.8128e-05	-0.000478594	0.000442338	-3.32375	0.936584	0.976099	primiparity;m_bmiincl;m_hbincl;GWG;w_age;m_heightincl;m_muacincl	FALSE
UBA733.sp900550795	Tri2, mother	Pre+Postnatal	0			0
Porphyromonas.uenonis	Tri2, mother	Pre+Postnatal	0			0
UBA1740.sp004558975	Tri2, mother	Pre+Postnatal	-3.66797e-05	-0.000201035	0.000127676	-4	0.652163	0.889731	primiparity;m_bmiincl;m_hbincl;ga_days_incl;GWG;w_age;m_heightincl;m_muacincl	FALSE
Unknown_Holdemanella	Tri2, mother	Pre+Postnatal	7.8524e-05	-0.000189524	0.000346572	4	0.554896	0.851959	primiparity;m_bmiincl;m_hbincl;ga_days_incl;w_age;m_heightincl;m_muacincl	FALSE
UMGS1781.sp900553365	Tri2, mother	Pre+Postnatal	-0.000100387	-0.000298175	9.74017e-05	-4	0.308608	0.751571	primiparity;m_bmiincl;m_hbincl;ga_days_incl;GWG;w_age;m_heightincl;m_muacincl	FALSE
Unknown_RUG591	Tri2, mother	Pre+Postnatal	0.000133702	-0.000164525	0.000431929	4	0.368322	0.768075	primiparity;m_bmiincl;m_hbincl;ga_days_incl;GWG;m_muacincl	FALSE
CAG.115.sp003516865	Tri2, mother	Pre+Postnatal	8.81051e-06	-7.07825e-05	8.84035e-05	1.6154	0.823502	0.938259	primiparity;m_hbincl;GWG;w_age	FALSE
Gordonibacter.pamelaeae	Tri2, mother	Pre+Postnatal	0			0
Anaerostipes.hadrus	Tri2, mother	Pre+Postnatal	0.000199122	-0.000135549	0.000533793	4	0.234689	0.73443	primiparity;m_bmiincl;m_hbincl;GWG;w_age;m_muacincl	FALSE
Haemophilus_D.parainfluenzae	Tri2, mother	Pre+Postnatal	-8.78217e-05	-0.000272244	9.66008e-05	-4	0.339329	0.751571	primiparity;m_bmiincl;m_hbincl;ga_days_incl;GWG;w_age;m_muacincl	FALSE
Eubacterium_R.coprostanoligenes	Tri2, mother	Pre+Postnatal	4.79257e-05	-0.000102082	0.000197934	4	0.519462	0.842261	primiparity;m_bmiincl;m_hbincl;ga_days_incl;GWG;w_age;m_heightincl;m_muacincl	FALSE
Sellimonas.sp002161525	Tri2, mother	Pre+Postnatal	0			0
Bacteroides.finegoldii	Tri2, mother	Pre+Postnatal	7.90198e-05	-4.8518e-05	0.000206558	4	0.216557	0.73443	primiparity;m_hbincl;GWG;w_age;m_heightincl	FALSE
Unknown_UMGS1795	Tri2, mother	Pre+Postnatal	2.75755e-05	-0.000162961	0.000218112	4	0.769832	0.920449	primiparity;m_bmiincl;m_hbincl;ga_days_incl;GWG;w_age;m_heightincl;m_muacincl	FALSE
Agathobaculum.sp900544475	Tri2, mother	Pre+Postnatal	-8.31595e-05	-0.000344871	0.000178552	-4	0.521717	0.842261	primiparity;m_bmiincl;m_hbincl;ga_days_incl;GWG;w_age;m_heightincl;m_muacincl	FALSE
Unknown_UBA1762	Tri2, mother	Pre+Postnatal	2.96547e-05	-5.71912e-05	0.000116501	4	0.492754	0.834743	primiparity;m_hbincl;ga_days_incl;GWG	FALSE
Unknown_CAG.127	Tri2, mother	Pre+Postnatal	0.000116939	-0.000260321	0.000494199	4	0.532273	0.848416	primiparity;m_hbincl;ga_days_incl;GWG;w_age;m_heightincl;m_muacincl	FALSE
Cutibacterium.avidum	Tri2, mother	Pre+Postnatal	0			0
QAMX01.sp004555605	Tri2, mother	Pre+Postnatal	-0.000221111	-0.00074708	0.000304857	-4	0.39781	0.796212	primiparity;m_bmiincl;m_hbincl;ga_days_incl;GWG;w_age;m_heightincl;m_muacincl	FALSE
Unknown_COE1	Tri2, mother	Pre+Postnatal	0.00017796	-0.000286603	0.000642522	4	0.440567	0.812306	primiparity;m_bmiincl;m_hbincl;ga_days_incl;GWG;w_age;m_heightincl;m_muacincl	FALSE
CAG.475.sp900550915	Tri2, mother	Pre+Postnatal	-0.000138527	-0.000358013	8.09589e-05	-4	0.20781	0.73443	primiparity;m_bmiincl;m_hbincl;ga_days_incl;w_age;m_heightincl;m_muacincl	FALSE
CAG.451.sp000438295	Tri2, mother	Pre+Postnatal	8.08348e-06	-4.53582e-05	6.15252e-05	1.4821	0.760001	0.915227	primiparity;m_bmiincl;m_hbincl;ga_days_incl;w_age;m_heightincl;m_muacincl	FALSE
Unknown_V9D3004	Tri2, mother	Pre+Postnatal	0.000103217	-0.00015053	0.000356964	4	0.414195	0.809581	primiparity;m_bmiincl;m_hbincl;m_heightincl;m_muacincl	FALSE
UMGS1810.sp900555295	Tri2, mother	Pre+Postnatal	4.92693e-05	-1.06892e-06	9.96074e-05	4	0.0547689	0.73443	primiparity;m_bmiincl;m_hbincl;GWG;w_age;m_heightincl;m_muacincl	FALSE
UBA11475.sp003538975	Tri2, mother	Pre+Postnatal	4.00547e-05	-4.13048e-05	0.000121414	4	0.323812	0.751571	primiparity;m_bmiincl;m_hbincl;ga_days_incl;w_age;m_heightincl	FALSE
Unknown_UMGS172	Tri2, mother	Pre+Postnatal	1.06478e-05	-3.28578e-05	5.41534e-05	1.95226	0.62183	0.872968	primiparity;m_bmiincl;m_hbincl;GWG;w_age;m_muacincl	FALSE
Enterococcus_B.hirae	Tri2, mother	Pre+Postnatal	-3.93125e-05	-0.000103361	2.47358e-05	-4	0.220534	0.73443	m_bmiincl;ga_days_incl;GWG;w_age;m_heightincl;m_muacincl	FALSE
UMGS1820.sp900555375	Tri2, mother	Pre+Postnatal	-2.19966e-05	-6.7754e-05	2.37608e-05	-4	0.335497	0.751571	m_bmiincl;m_hbincl;ga_days_incl;m_heightincl;m_muacincl	FALSE
Unknown_UBA1081	Tri2, mother	Pre+Postnatal	0			0
Unknown_Monoglobaceae	Tri2, mother	Pre+Postnatal	-2.4254e-05	-0.000141044	9.25358e-05	-4	0.675114	0.894593	primiparity;m_bmiincl;m_hbincl;GWG;w_age;m_heightincl;m_muacincl	FALSE
Unknown_UBA11549	Tri2, mother	Pre+Postnatal	1.31042e-05	-4.04378e-05	6.66461e-05	2.40263	0.62183	0.872968	primiparity;m_bmiincl;m_hbincl;GWG;w_age;m_muacincl	FALSE
CAG.110.sp900546075	Tri2, mother	Pre+Postnatal	0.000216394	-0.000299644	0.000732432	4	0.399365	0.796671	primiparity;m_bmiincl;m_hbincl;ga_days_incl;GWG;m_heightincl;m_muacincl	FALSE
Unknown_Treponema_D	Tri2, mother	Pre+Postnatal	0			0
UBA5905.sp900549155	Tri2, mother	Pre+Postnatal	6.03091e-06	-0.000180333	0.000192395	1.10576	0.947854	0.977569	primiparity;m_bmiincl;m_hbincl;ga_days_incl;w_age;m_heightincl;m_muacincl	FALSE
Unknown_UBA1067	Tri2, mother	Pre+Postnatal	-1.92354e-05	-4.60151e-05	7.54434e-06	-3.52678	0.153196	0.73443	m_bmiincl;m_hbincl;ga_days_incl;GWG;w_age;m_heightincl;m_muacincl	FALSE
Coprococcus.sp000433075	Tri2, mother	Pre+Postnatal	3.93771e-05	-0.00037244	0.000451194	4	0.846949	0.942788	primiparity;m_hbincl;GWG;w_age;m_heightincl;m_muacincl	FALSE
CAG.41.sp900066215	Tri2, mother	Pre+Postnatal	0.000107862	-0.000219563	0.000435286	4	0.508031	0.841388	primiparity;m_bmiincl;m_hbincl;m_heightincl	FALSE
UBA1777.sp900546515	Tri2, mother	Pre+Postnatal	-6.40006e-05	-0.000315119	0.000187117	-4	0.607236	0.872968	primiparity;m_bmiincl;m_hbincl;ga_days_incl;w_age;m_heightincl;m_muacincl	FALSE
Agathobaculum.butyriciproducens	Tri2, mother	Pre+Postnatal	-0.000253467	-0.000557976	5.10419e-05	-4	0.0995927	0.73443	primiparity;m_bmiincl;m_hbincl;ga_days_incl;GWG;w_age;m_heightincl;m_muacincl	FALSE
Citrobacter_A.amalonaticus	Tri2, mother	Pre+Postnatal	0			0
Alistipes_A.ihumii	Tri2, mother	Pre+Postnatal	0.000286516	-0.00017592	0.000748952	4	0.216557	0.73443	primiparity;m_hbincl;GWG;w_age;m_heightincl	FALSE
CAG.115.sp003531585	Tri2, mother	Pre+Postnatal	2.97599e-05	-3.69571e-05	9.64769e-05	4	0.371663	0.768075	primiparity;GWG;w_age	FALSE
Mitsuokella.sp900552565	Tri2, mother	Pre+Postnatal	-0.000209999	-0.000653559	0.000233561	-4	0.343077	0.751571	m_bmiincl;ga_days_incl;w_age;m_muacincl	FALSE
Unknown_CAG.353	Tri2, mother	Pre+Postnatal	7.38489e-05	-0.000247711	0.000395409	4	0.642782	0.886539	primiparity;m_bmiincl;m_hbincl;ga_days_incl;GWG;w_age;m_heightincl;m_muacincl	FALSE
Gemmiger.sp900556255	Tri2, mother	Pre+Postnatal	-5.68201e-05	-0.000119753	6.11309e-06	-4	0.0752915	0.73443	primiparity;ga_days_incl;GWG;w_age;m_heightincl	FALSE
UBA5905.sp002437905	Tri2, mother	Pre+Postnatal	-7.09457e-05	-0.000172628	3.07369e-05	-4	0.164721	0.73443	primiparity;m_bmiincl;m_hbincl;ga_days_incl;GWG;w_age;m_heightincl;m_muacincl	FALSE
CAG.465.sp000433335	Tri2, mother	Pre+Postnatal	2.4529e-05	-4.59077e-05	9.49657e-05	4	0.483608	0.828126	primiparity;m_bmiincl;GWG;w_age;m_heightincl;m_muacincl	FALSE
UMGS1815.sp900555345	Tri2, mother	Pre+Postnatal	2.83943e-05	-0.00029818	0.000354968	4	0.860405	0.948651	primiparity;m_bmiincl;m_hbincl;ga_days_incl;GWG;w_age;m_heightincl;m_muacincl	FALSE
Unknown_UBA6414	Tri2, mother	Pre+Postnatal	3.63531e-05	-0.000115399	0.000188105	4	0.62858	0.878196	primiparity;m_bmiincl;m_hbincl;ga_days_incl;GWG;w_age;m_heightincl;m_muacincl	FALSE
Phytobacter.diazotrophicus	Tri2, mother	Pre+Postnatal	0			0
Unknown_CAG.272	Tri2, mother	Pre+Postnatal	0.0001861	-0.000312245	0.000684446	4	0.452791	0.812504	primiparity;m_bmiincl;m_hbincl;ga_days_incl;GWG;m_muacincl	FALSE
Roseburia.sp900550935	Tri2, mother	Pre+Postnatal	0.000233583	-0.000220619	0.000687786	4	0.303029	0.751571	primiparity;m_bmiincl;GWG;w_age;m_heightincl;m_muacincl	FALSE
Unknown_Catenibacterium	Tri2, mother	Pre+Postnatal	5.56895e-05	-0.000108722	0.0002201	4	0.494816	0.834743	primiparity;m_bmiincl;m_hbincl;ga_days_incl;GWG;w_age;m_heightincl;m_muacincl	FALSE
Unknown_Senegalimassilia	Tri2, mother	Pre+Postnatal	-3.52506e-05	-9.89757e-05	2.84744e-05	-4	0.269086	0.751571	m_hbincl;ga_days_incl;w_age;m_heightincl	FALSE
Unknown_Clostridia	Tri2, mother	Pre+Postnatal	-3.7819e-06	-0.000257125	0.000249561	-0.693407	0.975931	0.990704	primiparity;m_bmiincl;m_hbincl;GWG;w_age;m_heightincl;m_muacincl	FALSE
SFFH01.sp900542445	Tri2, mother	Pre+Postnatal	-5.42962e-05	-0.000260116	0.000151524	-4	0.594742	0.871837	primiparity;m_bmiincl;m_hbincl;ga_days_incl;GWG;w_age;m_muacincl	FALSE
Butyricimonas.faecalis	Tri2, mother	Pre+Postnatal	-0.000154674	-0.000515711	0.000206362	-4	0.388966	0.785373	primiparity;m_bmiincl;m_hbincl;ga_days_incl;GWG;w_age;m_heightincl;m_muacincl	FALSE
UMGS1217.sp900549625	Tri2, mother	Pre+Postnatal	2.44661e-05	-7.51969e-06	5.64519e-05	4	0.129332	0.73443	primiparity;m_bmiincl;m_hbincl;w_age;m_muacincl	FALSE
Pauljensenia.sp000308055	Tri2, mother	Pre+Postnatal	0			0
Unknown_Hungatella_A	Tri2, mother	Pre+Postnatal	4.72342e-05	-9.05354e-05	0.000185004	4	0.489996	0.834143	primiparity;m_bmiincl;m_hbincl;ga_days_incl;GWG;w_age;m_heightincl	FALSE
Faecalibacterium.prausnitzii_M	Tri2, mother	Pre+Postnatal	-2.15823e-05	-0.000191346	0.000148182	-3.95709	0.797327	0.934794	primiparity;m_bmiincl;m_hbincl;ga_days_incl;GWG;m_heightincl;m_muacincl	FALSE
Unknown_Acidaminococcus	Tri2, mother	Pre+Postnatal	0			0
CAG.492.sp000434015	Tri2, mother	Pre+Postnatal	-0.00019124	-0.000562871	0.000180392	-4	0.303332	0.751571	primiparity;ga_days_incl;w_age;m_muacincl	FALSE
Tener.01.sp001940985	Tri2, mother	Pre+Postnatal	0			0
Unknown_CAG.451	Tri2, mother	Pre+Postnatal	0.000186789	-0.000433393	0.000806972	4	0.543519	0.850439	primiparity;m_bmiincl;m_hbincl;ga_days_incl;GWG;w_age;m_heightincl;m_muacincl	FALSE
UMGS1795.sp900555125	Tri2, mother	Pre+Postnatal	-3.85659e-05	-0.000169608	9.24763e-05	-4	0.553079	0.851959	primiparity;m_bmiincl;m_hbincl;GWG;w_age;m_heightincl;m_muacincl	FALSE
Coprococcus.sp900066115	Tri2, mother	Pre+Postnatal	-2.77492e-05	-0.00013746	8.1962e-05	-4	0.610269	0.872968	primiparity;m_bmiincl;m_hbincl;GWG;m_heightincl;m_muacincl	FALSE
CAG.81.sp900066785	Tri2, mother	Pre+Postnatal	0			0
Unknown_UBA1829	Tri2, mother	Pre+Postnatal	1.39252e-05	-0.000111873	0.000139724	2.55317	0.823502	0.938259	primiparity;m_hbincl;GWG;w_age	FALSE
Klebsiella_A.michiganensis	Tri2, mother	Pre+Postnatal	0			0
UBA10281.sp900556195	Tri2, mother	Pre+Postnatal	-7.76597e-06	-0.00010879	9.32585e-05	-1.42388	0.876673	0.957064	primiparity;m_hbincl;ga_days_incl;w_age;m_heightincl;m_muacincl	FALSE
CAG.110.sp900544705	Tri2, mother	Pre+Postnatal	-0.000232089	-0.000520582	5.6403e-05	-4	0.111186	0.73443	primiparity;ga_days_incl;GWG;w_age;m_heightincl;m_muacincl	FALSE
Lawsonibacter.sp900545895	Tri2, mother	Pre+Postnatal	0.000257869	-0.000158331	0.000674068	4	0.216557	0.73443	primiparity;m_hbincl;GWG;w_age;m_heightincl	FALSE
Unknown_Olsenella_E	Tri2, mother	Pre+Postnatal	2.81425e-05	-0.000131912	0.000188197	4	0.723269	0.903892	primiparity;m_bmiincl;w_age;m_muacincl	FALSE
Duodenibacillus.sp900538905	Tri2, mother	Pre+Postnatal	3.4138e-05	-9.88257e-05	0.000167102	4	0.604912	0.872968	primiparity;m_hbincl;ga_days_incl;GWG;w_age;m_muacincl	FALSE
Oscillibacter.sp900548505	Tri2, mother	Pre+Postnatal	0.000254915	-0.000156517	0.000666348	4	0.216557	0.73443	primiparity;m_hbincl;GWG;w_age;m_heightincl	FALSE
Unknown_AM51.8	Tri2, mother	Pre+Postnatal	-5.25213e-07	-0.000285892	0.000284841	-0.0962971	0.997029	0.999612	primiparity;m_bmiincl;m_hbincl;ga_days_incl;GWG;w_age;m_heightincl;m_muacincl	FALSE
UBA10281.sp900554485	Tri2, mother	Pre+Postnatal	3.95138e-05	-6.18858e-05	0.000140913	4	0.433547	0.81213	primiparity;m_bmiincl;m_hbincl;ga_days_incl;w_age;m_muacincl	FALSE
Lactococcus.lactis_A	Tri2, mother	Pre+Postnatal	0			0
SFFS01.sp004557805	Tri2, mother	Pre+Postnatal	-7.67052e-05	-0.000715488	0.000562078	-4	0.808144	0.938259	primiparity;m_bmiincl;m_hbincl;ga_days_incl;GWG;w_age;m_heightincl;m_muacincl	FALSE
UMGS1864.sp900555835	Tri2, mother	Pre+Postnatal	9.34822e-05	2.77855e-05	0.000159179	4	0.00676702	0.73443	primiparity;m_bmiincl;m_hbincl;ga_days_incl;GWG;w_age;m_heightincl;m_muacincl	TRUE
UMGS363.sp900550695	Tri2, mother	Pre+Postnatal	3.97154e-05	-0.000122043	0.000201474	4	0.620085	0.872968	primiparity;m_bmiincl;m_hbincl;ga_days_incl;GWG;w_age;m_heightincl;m_muacincl	FALSE
Enterococcus_D.gallinarum	Tri2, mother	Pre+Postnatal	0			0
Catenibacterium.sp000437715	Tri2, mother	Pre+Postnatal	0			0
CAG.460.sp900551525	Tri2, mother	Pre+Postnatal	5.09001e-05	-0.000173412	0.000275212	4	0.647351	0.888406	primiparity;ga_days_incl;GWG;w_age;m_heightincl;m_muacincl	FALSE
F23.B02.sp000431075	Tri2, mother	Pre+Postnatal	0			0
CAG.127.sp900553925	Tri2, mother	Pre+Postnatal	0.000198965	-5.94641e-05	0.000457393	4	0.126515	0.73443	primiparity;m_bmiincl;m_hbincl;ga_days_incl;GWG;w_age;m_heightincl;m_muacincl	FALSE
CAG.449.sp900551385	Tri2, mother	Pre+Postnatal	2.39077e-05	-3.74505e-05	8.5266e-05	4	0.433231	0.81213	primiparity;m_bmiincl;m_hbincl;GWG;w_age;m_heightincl;m_muacincl	FALSE
Unknown_UBA3631	Tri2, mother	Pre+Postnatal	0.000191451	-2.20236e-05	0.000404926	4	0.0771234	0.73443	primiparity;m_bmiincl;m_hbincl;ga_days_incl;w_age;m_muacincl	FALSE
Anaerococcus.rubeinfantis	Tri2, mother	Pre+Postnatal	0			0
Christensenella.minuta	Tri2, mother	Pre+Postnatal	0			0
CAG.127.sp900539705	Tri2, mother	Pre+Postnatal	8.72482e-05	-0.000188412	0.000362909	4	0.523716	0.842261	primiparity;m_hbincl;ga_days_incl;GWG;w_age;m_heightincl;m_muacincl	FALSE
Eubacterium_R.sp900540235	Tri2, mother	Pre+Postnatal	-0.000108002	-0.000352055	0.00013605	-4	0.374101	0.770091	primiparity;m_bmiincl;m_hbincl;ga_days_incl;w_age;m_heightincl;m_muacincl	FALSE
Senegalimassilia.anaerobia	Tri2, mother	Pre+Postnatal	0			0
Unknown_Paraprevotella	Tri2, mother	Pre+Postnatal	-0.000290047	-0.000638236	5.8142e-05	-4	0.0997801	0.73443	m_bmiincl;m_hbincl;m_muacincl	FALSE
Unknown_CAG.312_1	Tri2, mother	Pre+Postnatal	-9.21077e-05	-0.00041315	0.000228935	-4	0.562689	0.853105	primiparity;m_bmiincl;m_hbincl;ga_days_incl;GWG;w_age;m_heightincl;m_muacincl	FALSE
Faecalicoccus.sp900546545	Tri2, mother	Pre+Postnatal	0			0
Mediterraneibacter.faecis	Tri2, mother	Pre+Postnatal	1.66769e-05	-0.000121835	0.000155189	3.0577	0.808006	0.938259	primiparity;ga_days_incl;GWG;w_age;m_heightincl;m_muacincl	FALSE
Haemophilus_D.parainfluenzae_N	Tri2, mother	Pre+Postnatal	-7.16504e-05	-0.000161539	1.82386e-05	-4	0.114697	0.73443	m_hbincl;GWG;w_age	FALSE
Unknown_LC.2	Tri2, mother	Pre+Postnatal	0			0
UBA4705.sp004554425	Tri2, mother	Pre+Postnatal	-5.87558e-05	-0.00018098	6.34684e-05	-4	0.335497	0.751571	m_bmiincl;m_hbincl;ga_days_incl;m_heightincl;m_muacincl	FALSE
Klebsiella_A.oxytoca	Tri2, mother	Pre+Postnatal	0			0
Unknown_Firm.11	Tri2, mother	Pre+Postnatal	3.16436e-05	-0.000485721	0.000549008	4	0.901631	0.967277	primiparity;m_bmiincl;m_hbincl;ga_days_incl;GWG;w_age;m_heightincl	FALSE
CAG.269.sp000435535	Tri2, mother	Pre+Postnatal	0.000138692	-3.70711e-06	0.00028109	4	0.055931	0.73443	primiparity;m_bmiincl;w_age;m_muacincl	FALSE
Unknown_RUG756	Tri2, mother	Pre+Postnatal	2.04919e-05	-9.61311e-05	0.000137115	3.75716	0.723234	0.903892	primiparity;m_bmiincl;m_hbincl;GWG;m_muacincl	FALSE
Eubacterium_I.ramulus	Tri2, mother	Pre+Postnatal	0			0
UMGS1477.sp900552205	Tri2, mother	Pre+Postnatal	-2.37973e-05	-8.22862e-05	3.46917e-05	-4	0.413378	0.809581	primiparity;m_bmiincl;ga_days_incl;GWG;w_age;m_heightincl;m_muacincl	FALSE
Streptococcus.thermophilus	Tri2, mother	Pre+Postnatal	0			0
CAG.552.sp000435495	Tri2, mother	Pre+Postnatal	-4.07849e-05	-0.000357911	0.000276341	-4	0.794827	0.933256	primiparity;m_bmiincl;m_hbincl;ga_days_incl;GWG;w_age;m_heightincl;m_muacincl	FALSE
CAG.302.sp900554615	Tri2, mother	Pre+Postnatal	-2.73565e-05	-8.25931e-05	2.78801e-05	-4	0.320971	0.751571	primiparity;m_bmiincl;m_hbincl;GWG;w_age;m_muacincl	FALSE
Unknown_UMGS1603	Tri2, mother	Pre+Postnatal	-9.2289e-05	-0.00033806	0.000153482	-4	0.449556	0.812306	primiparity;m_bmiincl;m_hbincl;ga_days_incl;GWG;w_age;m_heightincl;m_muacincl	FALSE
Massilioclostridium.coli	Tri2, mother	Pre+Postnatal	0			0
UMGS755.sp900545185	Tri2, mother	Pre+Postnatal	-7.32749e-05	-0.000196031	4.9481e-05	-4	0.232632	0.73443	primiparity;m_bmiincl;m_hbincl;ga_days_incl;GWG;w_age;m_heightincl;m_muacincl	FALSE
Unknown_QAMH01	Tri2, mother	Pre+Postnatal	-1.86573e-05	-9.72722e-05	5.99576e-05	-3.42079	0.631768	0.879682	primiparity;m_bmiincl;m_hbincl;ga_days_incl;GWG;w_age;m_heightincl;m_muacincl	FALSE
Ruminococcus_C.callidus	Tri2, mother	Pre+Postnatal	-0.000109375	-0.000190411	-2.83387e-05	-4	0.00960334	0.73443	m_bmiincl;m_hbincl;ga_days_incl;m_muacincl	TRUE
CAG.302.sp000431795	Tri2, mother	Pre+Postnatal	1.24287e-06	-8.95062e-05	9.1992e-05	0.227878	0.977917	0.990717	primiparity;m_bmiincl;m_hbincl;GWG;w_age;m_heightincl;m_muacincl	FALSE
Agathobacter.sp000434275	Tri2, mother	Pre+Postnatal	0			0
Unknown_Ruminococcus_A	Tri2, mother	Pre+Postnatal	3.54834e-05	-1.04553e-05	8.1422e-05	4	0.125741	0.73443	primiparity;m_bmiincl;m_hbincl;w_age;m_heightincl	FALSE
Pauljensenia.sp900556405	Tri2, mother	Pre+Postnatal	0			0
Lacticaseibacillus.paracasei	Tri2, mother	Pre+Postnatal	0			0
Unknown_UMGS1002	Tri2, mother	Pre+Postnatal	9.69784e-05	-0.000149623	0.00034358	4	0.42938	0.81213	primiparity;m_bmiincl;ga_days_incl;GWG;w_age;m_heightincl	FALSE
CAG.1193.sp900550145	Tri2, mother	Pre+Postnatal	6.10613e-06	-0.000116925	0.000129137	1.11955	0.920026	0.969759	primiparity;m_bmiincl;m_hbincl;ga_days_incl;GWG;w_age;m_heightincl;m_muacincl	FALSE
Coprococcus.sp900557435	Tri2, mother	Pre+Postnatal	3.98816e-06	-7.23161e-05	8.02924e-05	0.731224	0.915879	0.969759	primiparity;m_bmiincl;m_hbincl;GWG;w_age;m_heightincl;m_muacincl	FALSE
Unknown_UMGS1487	Tri2, mother	Pre+Postnatal	-3.31878e-05	-0.000230413	0.000164038	-4	0.733768	0.90849	primiparity;m_bmiincl;m_hbincl;ga_days_incl;GWG;w_age;m_heightincl;m_muacincl	FALSE
CAG.238.sp900551415	Tri2, mother	Pre+Postnatal	-0.000275058	-0.00083051	0.000280393	-4	0.320693	0.751571	primiparity;m_bmiincl;ga_days_incl;GWG;w_age;m_heightincl;m_muacincl	FALSE
Firm.11.sp004556545	Tri2, mother	Pre+Postnatal	4.35158e-06	-0.000198526	0.000207229	0.797857	0.965387	0.985236	primiparity;m_bmiincl;m_hbincl;ga_days_incl;GWG;w_age;m_heightincl;m_muacincl	FALSE
Dysgonomonas.capnocytophagoides	Tri2, mother	Pre+Postnatal	0			0
CAG.1435.sp003537755	Tri2, mother	Pre+Postnatal	2.43929e-05	-3.01701e-05	7.89559e-05	4	0.370307	0.768075	primiparity;m_bmiincl;m_hbincl;w_age	FALSE
Bifidobacterium.vaginale_G	Tri2, mother	Pre+Postnatal	0			0
Unknown_UMGS1484	Tri2, mother	Pre+Postnatal	-3.95669e-05	-0.000277395	0.000198261	-4	0.736665	0.909859	primiparity;m_bmiincl;m_hbincl;ga_days_incl;GWG;w_age;m_heightincl;m_muacincl	FALSE
Eisenbergiella.sp900066775	Tri2, mother	Pre+Postnatal	0.000330738	-3.40595e-05	0.000695536	4	0.0740486	0.73443	primiparity;m_bmiincl;m_hbincl;ga_days_incl;GWG;w_age;m_heightincl	FALSE
Ruminococcus_D.sp900539095	Tri2, mother	Pre+Postnatal	-0.000284306	-0.000594644	2.60313e-05	-4	0.0713322	0.73443	m_bmiincl;m_hbincl;w_age;m_muacincl	FALSE
Unknown_UBA11490	Tri2, mother	Pre+Postnatal	-0.000136104	-0.000471973	0.000199764	-4	0.41524	0.810241	primiparity;m_bmiincl;ga_days_incl;GWG;w_age;m_heightincl;m_muacincl	FALSE
Neisseria.subflava_B	Tri2, mother	Pre+Postnatal	0			0
UBA1820.sp002314265	Tri2, mother	Pre+Postnatal	7.3211e-05	-4.49514e-05	0.000191374	4	0.216557	0.73443	primiparity;m_hbincl;GWG;w_age;m_heightincl	FALSE
Bacteroides.salyersiae	Tri2, mother	Pre+Postnatal	0.000174862	-0.000210608	0.000560332	4	0.362746	0.768075	primiparity;m_bmiincl;m_hbincl;GWG;w_age;m_muacincl	FALSE
Unknown_Firm.18	Tri2, mother	Pre+Postnatal	-1.55394e-05	-7.84267e-05	4.7348e-05	-2.84912	0.618496	0.872968	primiparity;m_bmiincl;m_hbincl;ga_days_incl;GWG;m_heightincl	FALSE
Holdemanella.biformis	Tri2, mother	Pre+Postnatal	3.83099e-05	-1.63424e-05	9.29622e-05	4	0.163401	0.73443	primiparity;m_bmiincl;GWG;w_age;m_muacincl	FALSE
Unknown_UBA1242	Tri2, mother	Pre+Postnatal	4.43537e-05	-2.14703e-05	0.000110178	4	0.179658	0.73443	primiparity;m_hbincl;GWG;w_age;m_heightincl;m_muacincl	FALSE
Unknown_UBA7102	Tri2, mother	Pre+Postnatal	-0.000270508	-0.000659495	0.000118479	-4	0.166287	0.73443	primiparity;m_bmiincl;ga_days_incl;GWG;w_age;m_heightincl;m_muacincl	FALSE
Stenotrophomonas.maltophilia_AK	Tri2, mother	Pre+Postnatal	0			0
Intestinimonas.butyriciproducens	Tri2, mother	Pre+Postnatal	4.86871e-05	-2.98938e-05	0.000127268	4	0.216557	0.73443	primiparity;m_hbincl;GWG;w_age;m_heightincl	FALSE
Bacteroides.nordii	Tri2, mother	Pre+Postnatal	3.11055e-05	-0.000143018	0.000205229	4	0.71904	0.902872	primiparity;GWG;w_age;m_heightincl	FALSE
Schaedlerella.sp900066545	Tri2, mother	Pre+Postnatal	4.25297e-05	-9.2082e-05	0.000177141	4	0.524075	0.842261	primiparity;m_bmiincl;m_hbincl;ga_days_incl;GWG;w_age;m_heightincl;m_muacincl	FALSE
Enterobacter.kobei	Tri2, mother	Pre+Postnatal	-0.000201166	-0.00050774	0.000105407	-4	0.191014	0.73443	m_bmiincl;m_hbincl;ga_days_incl;GWG;m_heightincl;m_muacincl	FALSE
Unknown_CAG.81	Tri2, mother	Pre+Postnatal	0.000184644	-7.12749e-05	0.000440562	4	0.151425	0.73443	primiparity;m_bmiincl;m_hbincl;ga_days_incl;GWG;m_heightincl;m_muacincl	FALSE
Roseburia.intestinalis	Tri2, mother	Pre+Postnatal	-0.000172541	-0.000577603	0.000232522	-4	0.391659	0.787554	primiparity;m_bmiincl;m_hbincl;ga_days_incl;GWG;w_age;m_heightincl;m_muacincl	FALSE
CAG.306.sp000980375	Tri2, mother	Pre+Postnatal	0.00020495	-0.000125839	0.000535738	4	0.216557	0.73443	primiparity;m_hbincl;GWG;w_age;m_heightincl	FALSE
CAG.460.sp000437355	Tri2, mother	Pre+Postnatal	2.96429e-05	-4.56875e-05	0.000104973	4	0.42834	0.81213	primiparity;m_bmiincl;m_hbincl;ga_days_incl;GWG;w_age;m_heightincl;m_muacincl	FALSE
Unknown_UBA3637	Tri2, mother	Pre+Postnatal	3.22293e-06	-9.52307e-05	0.000101677	0.59092	0.947198	0.977569	primiparity;m_bmiincl;m_hbincl;ga_days_incl;GWG;w_age;m_heightincl;m_muacincl	FALSE
Intestinimonas.massiliensis	Tri2, mother	Pre+Postnatal	0			0
UMGS973.sp900547295	Tri2, mother	Pre+Postnatal	8.74009e-05	-0.000148638	0.00032344	4	0.455833	0.814039	primiparity;m_bmiincl;m_hbincl;ga_days_incl;GWG;w_age;m_heightincl;m_muacincl	FALSE
UMGS1494.sp900552305	Tri2, mother	Pre+Postnatal	6.8648e-05	-2.73926e-05	0.000164689	4	0.154951	0.73443	primiparity;m_bmiincl;m_hbincl;ga_days_incl;GWG;w_age;m_heightincl;m_muacincl	FALSE
Slackia_A.isoflavoniconvertens	Tri2, mother	Pre+Postnatal	-4.62377e-05	-0.000107211	1.4736e-05	-4	0.132411	0.73443	primiparity;ga_days_incl;GWG;w_age;m_heightincl;m_muacincl	FALSE
Senegalimassilia.sp900550055	Tri2, mother	Pre+Postnatal	0			0
Unknown_Clostridium_AI	Tri2, mother	Pre+Postnatal	0			0
Bulleidia.moorei	Tri2, mother	Pre+Postnatal	3.73854e-06	-1.71892e-05	2.46662e-05	0.685456	0.71904	0.902872	primiparity;GWG;w_age;m_heightincl	FALSE
Coprococcus.sp900548215	Tri2, mother	Pre+Postnatal	6.63943e-05	-2.76874e-06	0.000135557	4	0.0593345	0.73443	primiparity;m_bmiincl;m_hbincl;w_age;m_heightincl;m_muacincl	FALSE
Unknown_CAG.1193	Tri2, mother	Pre+Postnatal	2.85601e-05	-0.000309184	0.000366304	4	0.864329	0.950271	primiparity;m_bmiincl;m_hbincl;ga_days_incl;w_age;m_heightincl;m_muacincl	FALSE
Erysipelatoclostridium.sp003024675	Tri2, mother	Pre+Postnatal	4.02708e-05	-8.15391e-05	0.000162081	4	0.506524	0.841307	primiparity;m_bmiincl;m_hbincl;w_age	FALSE
Unknown_Firm.10	Tri2, mother	Pre+Postnatal	-0.000168004	-0.000419893	8.38847e-05	-4	0.183778	0.73443	primiparity;m_bmiincl;ga_days_incl;GWG;w_age;m_heightincl;m_muacincl	FALSE
Parabacteroides.sp000436495	Tri2, mother	Pre+Postnatal	-0.000151874	-0.000464408	0.00016066	-4	0.330347	0.751571	m_bmiincl;ga_days_incl;w_age;m_heightincl;m_muacincl	FALSE
Blautia_A.sp900066145	Tri2, mother	Pre+Postnatal	-0.00010391	-0.000403759	0.00019594	-4	0.485372	0.828702	primiparity;m_bmiincl;m_hbincl;ga_days_incl;GWG;m_heightincl;m_muacincl	FALSE
CAG.110.sp900556935	Tri2, mother	Pre+Postnatal	5.10366e-05	-0.000115121	0.000217195	4	0.535605	0.849215	primiparity;m_bmiincl;m_hbincl;ga_days_incl;GWG;w_age;m_heightincl;m_muacincl	FALSE
CAG.628.sp900553835	Tri2, mother	Pre+Postnatal	0.000181286	-0.00015022	0.000512793	4	0.273926	0.751571	primiparity;m_hbincl;GWG;w_age;m_heightincl;m_muacincl	FALSE
Duodenibacillus.sp900544335	Tri2, mother	Pre+Postnatal	-3.89688e-05	-0.000420527	0.000342589	-4	0.836359	0.942601	primiparity;m_bmiincl;m_hbincl;ga_days_incl;GWG;w_age;m_heightincl;m_muacincl	FALSE
Clostridium_E.jeddahense	Tri2, mother	Pre+Postnatal	0			0
Megasphaera_B.hexanoica	Tri2, mother	Pre+Postnatal	0			0
Acidaminococcus.sp000437815	Tri2, mother	Pre+Postnatal	0			0
UBA11963.sp900552975	Tri2, mother	Pre+Postnatal	8.51953e-05	-0.000212867	0.000383258	4	0.5645	0.854478	primiparity;m_bmiincl;m_hbincl;ga_days_incl;w_age;m_heightincl;m_muacincl	FALSE
Unknown_UMGS874	Tri2, mother	Pre+Postnatal	-4.60795e-05	-0.000144519	5.23603e-05	-4	0.347119	0.751571	primiparity;m_bmiincl;m_hbincl;ga_days_incl;GWG;w_age;m_heightincl;m_muacincl	FALSE
Haemophilus_D.parainfluenzae_L	Tri2, mother	Pre+Postnatal	-5.46141e-05	-0.000122506	1.32781e-05	-4	0.111515	0.73443	m_hbincl;GWG;w_age	FALSE
UBA737.sp900547305	Tri2, mother	Pre+Postnatal	6.17852e-05	-2.67543e-05	0.000150325	4	0.165062	0.73443	m_bmiincl;m_hbincl;GWG;w_age;m_heightincl;m_muacincl	FALSE
Unknown_UBA11517	Tri2, mother	Pre+Postnatal	-2.71796e-05	-0.000192889	0.00013853	-4	0.74024	0.910402	primiparity;m_bmiincl;m_hbincl;ga_days_incl;GWG;w_age;m_heightincl;m_muacincl	FALSE
Unknown_UMGS1279	Tri2, mother	Pre+Postnatal	-1.85722e-05	-6.37781e-05	2.66338e-05	-3.40519	0.409915	0.809373	m_hbincl;ga_days_incl;w_age;m_heightincl	FALSE
CAG.312.sp900548275	Tri2, mother	Pre+Postnatal	-1.7636e-05	-0.000208544	0.000173272	-3.23353	0.852069	0.943226	primiparity;m_hbincl;ga_days_incl;GWG;w_age;m_muacincl	FALSE
UMGS1994.sp900556975	Tri2, mother	Pre+Postnatal	0			0
Streptococcus.mitis_D	Tri2, mother	Pre+Postnatal	0			0
Unknown_SFTH01	Tri2, mother	Pre+Postnatal	5.58111e-05	-8.36606e-05	0.000195283	4	0.421405	0.81213	primiparity;m_bmiincl;m_hbincl;GWG;w_age;m_heightincl	FALSE
Unknown_CAG.302_1	Tri2, mother	Pre+Postnatal	-8.04956e-05	-0.000368556	0.000207565	-4	0.574136	0.863435	primiparity;m_bmiincl;m_hbincl;m_muacincl	FALSE
Unknown_UBA1737	Tri2, mother	Pre+Postnatal	7.76036e-05	-0.000119164	0.000274371	4	0.42731	0.81213	primiparity;m_bmiincl;m_hbincl;ga_days_incl;GWG;w_age;m_heightincl;m_muacincl	FALSE
UBA4855.sp900545015	Tri2, mother	Pre+Postnatal	0			0
UMGS621.sp900543915	Tri2, mother	Pre+Postnatal	0.000186368	-0.00011443	0.000487165	4	0.216557	0.73443	primiparity;m_hbincl;GWG;w_age;m_heightincl	FALSE
UMGS2055.sp900557635	Tri2, mother	Pre+Postnatal	3.13507e-05	-0.000108635	0.000171336	4	0.651339	0.889731	primiparity;m_bmiincl;m_hbincl;ga_days_incl;GWG;w_age;m_muacincl	FALSE
Lacticaseibacillus.rhamnosus	Tri2, mother	Pre+Postnatal	0			0
Enterococcus_B.faecium_B	Tri2, mother	Pre+Postnatal	-6.14008e-05	-0.000123586	7.84795e-07	-4	0.0527935	0.73443	m_bmiincl;m_hbincl;GWG;w_age;m_heightincl;m_muacincl	FALSE
CAG.533.sp900553855	Tri2, mother	Pre+Postnatal	-4.38969e-05	-0.000141355	5.35615e-05	-4	0.365381	0.768075	primiparity;m_bmiincl;m_hbincl;ga_days_incl;GWG;w_age;m_heightincl;m_muacincl	FALSE
SFFH01.sp900548125	Tri2, mother	Pre+Postnatal	-9.75574e-05	-0.000206488	1.13733e-05	-4	0.0776089	0.73443	m_bmiincl;ga_days_incl;GWG;m_heightincl	FALSE
UBA1067.sp900320855	Tri2, mother	Pre+Postnatal	0			0
Unknown_Coprococcus	Tri2, mother	Pre+Postnatal	-0.000131267	-0.000408529	0.000145995	-4	0.343077	0.751571	m_bmiincl;ga_days_incl;w_age;m_muacincl	FALSE
Unknown_CAG.557	Tri2, mother	Pre+Postnatal	0			0
UMGS1889.sp900556055	Tri2, mother	Pre+Postnatal	-5.82743e-05	-0.000372577	0.000256028	-4	0.707902	0.902872	primiparity;m_bmiincl;m_hbincl;ga_days_incl;GWG;w_age;m_heightincl;m_muacincl	FALSE
CAG.841.sp002479075	Tri2, mother	Pre+Postnatal	0.000239493	-0.000154805	0.000633791	4	0.225278	0.73443	primiparity;m_bmiincl;ga_days_incl;GWG;m_heightincl;m_muacincl	FALSE
Paraprevotella.clara	Tri2, mother	Pre+Postnatal	-3.67596e-05	-0.000141448	6.79292e-05	-4	0.480673	0.827496	m_hbincl;GWG;w_age;m_muacincl	FALSE
Longicatena.innocuum	Tri2, mother	Pre+Postnatal	0			0
Roseburia.sp001940165	Tri2, mother	Pre+Postnatal	-3.26187e-05	-0.000116055	5.08174e-05	-4	0.431323	0.81213	primiparity;m_bmiincl;m_hbincl;ga_days_incl;GWG;w_age;m_heightincl;m_muacincl	FALSE
Dorea.phocaeensis	Tri2, mother	Pre+Postnatal	0			0
CAG.269.sp900551615	Tri2, mother	Pre+Postnatal	9.44174e-05	-4.59485e-05	0.000234783	4	0.180395	0.73443	m_hbincl;ga_days_incl;GWG;w_age;m_heightincl;m_muacincl	FALSE
Holdemanella.sp002299315	Tri2, mother	Pre+Postnatal	-7.06482e-05	-0.00017355	3.22533e-05	-4	0.171586	0.73443	primiparity;m_hbincl;ga_days_incl;GWG;w_age;m_heightincl;m_muacincl	FALSE
RUG705.sp900551455	Tri2, mother	Pre+Postnatal	3.04497e-05	-4.86149e-05	0.000109514	4	0.438897	0.812306	primiparity;m_bmiincl;m_hbincl;w_age;m_heightincl;m_muacincl	FALSE
CAG.605.sp000433475	Tri2, mother	Pre+Postnatal	-0.000122999	-0.000343373	9.73741e-05	-4	0.264612	0.748923	primiparity;ga_days_incl;GWG;w_age;m_muacincl	FALSE
Coprococcus.eutactus	Tri2, mother	Pre+Postnatal	-8.41797e-05	-0.000229569	6.12092e-05	-4	0.247502	0.743284	primiparity;m_bmiincl;GWG;w_age;m_muacincl	FALSE
CAG.475.sp900547975	Tri2, mother	Pre+Postnatal	-1.9672e-05	-5.61527e-05	1.68086e-05	-3.60684	0.280223	0.751571	m_bmiincl;m_hbincl;ga_days_incl;GWG;w_age;m_heightincl;m_muacincl	FALSE
Clostridium_Q.sp003024715	Tri2, mother	Pre+Postnatal	9.10371e-06	-0.000240539	0.000258747	1.66915	0.94119	0.977569	primiparity;m_bmiincl;m_hbincl;ga_days_incl;GWG;w_age;m_heightincl;m_muacincl	FALSE
Lawsonibacter.sp900550705	Tri2, mother	Pre+Postnatal	1.66831e-06	-5.30664e-05	5.6403e-05	0.305883	0.950831	0.978648	primiparity;m_bmiincl;m_hbincl;ga_days_incl;GWG;w_age;m_heightincl;m_muacincl	FALSE
CAG.611.sp900552235	Tri2, mother	Pre+Postnatal	1.49252e-05	-0.000255176	0.000285027	2.73652	0.910996	0.968847	primiparity;m_bmiincl;m_hbincl;ga_days_incl;GWG;w_age;m_heightincl;m_muacincl	FALSE
UBA1829.sp002338895	Tri2, mother	Pre+Postnatal	4.41047e-05	-2.70802e-05	0.00011529	4	0.216557	0.73443	primiparity;m_hbincl;GWG;w_age;m_heightincl	FALSE
Streptococcus.parasanguinis_B	Tri2, mother	Pre+Postnatal	0			0
Unknown_UMGS1477	Tri2, mother	Pre+Postnatal	1.82903e-06	-1.46903e-05	1.83483e-05	0.335351	0.822826	0.938259	primiparity;m_bmiincl;m_hbincl;ga_days_incl;GWG;w_age;m_heightincl;m_muacincl	FALSE
UBA10281.sp000437515	Tri2, mother	Pre+Postnatal	-0.000104776	-0.000187707	-2.18454e-05	-4	0.0148563	0.73443	primiparity;m_bmiincl;m_hbincl;ga_days_incl;w_age;m_muacincl	TRUE
Unknown_CAG.698	Tri2, mother	Pre+Postnatal	4.28562e-05	-3.9656e-05	0.000125368	4	0.298625	0.751571	primiparity;m_bmiincl;ga_days_incl;GWG;w_age	FALSE
TF01.11.sp001916135	Tri2, mother	Pre+Postnatal	1.49887e-05	-0.000256819	0.000286796	2.74816	0.911267	0.968847	primiparity;m_bmiincl;m_hbincl;ga_days_incl;w_age;m_heightincl;m_muacincl	FALSE
Pseudoflavonifractor.capillosus	Tri2, mother	Pre+Postnatal	0.000169592	-0.000104129	0.000443314	4	0.216557	0.73443	primiparity;m_hbincl;GWG;w_age;m_heightincl	FALSE
Unknown_Oxalobacter	Tri2, mother	Pre+Postnatal	-5.46585e-05	-0.000312818	0.000203501	-4	0.669166	0.892326	primiparity;m_bmiincl;m_hbincl;GWG;w_age;m_heightincl;m_muacincl	FALSE
UBA11774.sp003507655	Tri2, mother	Pre+Postnatal	0			0
Methanosphaera.stadtmanae	Tri2, mother	Pre+Postnatal	3.79425e-05	-0.000206518	0.000282403	4	0.753707	0.915227	primiparity;m_bmiincl;m_hbincl;ga_days_incl;GWG;w_age;m_heightincl;m_muacincl	FALSE
Desulfovibrio.sp900540515	Tri2, mother	Pre+Postnatal	-1.98934e-05	-0.000120166	8.03791e-05	-3.64744	0.689085	0.897899	primiparity;m_bmiincl;m_hbincl;w_age;m_heightincl;m_muacincl	FALSE
ER4.sp900552375	Tri2, mother	Pre+Postnatal	0.000267111	-1.52778e-05	0.0005495	4	0.0629075	0.73443	primiparity;m_bmiincl;m_hbincl;ga_days_incl;GWG;w_age;m_heightincl;m_muacincl	FALSE
UBA11452.sp003526375	Tri2, mother	Pre+Postnatal	-2.1805e-05	-0.000253252	0.000209642	-3.99792	0.848881	0.942788	primiparity;m_bmiincl;m_hbincl;ga_days_incl;GWG;w_age;m_heightincl;m_muacincl	FALSE
Unknown_CAG.552	Tri2, mother	Pre+Postnatal	2.60886e-06	-5.94117e-05	6.46294e-05	0.478332	0.932317	0.975467	primiparity;m_hbincl;GWG;w_age;m_heightincl;m_muacincl	FALSE
Unknown_CAG.878	Tri2, mother	Pre+Postnatal	-1.97977e-05	-6.16142e-05	2.20189e-05	-3.62988	0.343077	0.751571	m_bmiincl;ga_days_incl;w_age;m_muacincl	FALSE
Streptococcus.mitis_AC	Tri2, mother	Pre+Postnatal	0			0
UBA71.sp006954465	Tri2, mother	Pre+Postnatal	2.68558e-05	-1.49193e-05	6.86309e-05	4	0.200379	0.73443	primiparity;m_bmiincl;GWG;m_muacincl	FALSE
UMGS1487.sp900552225	Tri2, mother	Pre+Postnatal	6.5716e-05	-0.000159393	0.000290825	4	0.555902	0.851959	primiparity;m_bmiincl;m_hbincl;ga_days_incl;GWG;w_age;m_heightincl;m_muacincl	FALSE
Unknown_RF32	Tri2, mother	Pre+Postnatal	9.07987e-06	-7.14456e-06	2.53043e-05	1.66478	0.263069	0.748923	primiparity;m_hbincl;GWG;w_age;m_heightincl;m_muacincl	FALSE
UMGS692.sp900544545	Tri2, mother	Pre+Postnatal	4.33116e-05	-7.31583e-05	0.000159782	4	0.455338	0.814039	primiparity;m_hbincl;GWG;w_age	FALSE
Unknown_UMGS1865	Tri2, mother	Pre+Postnatal	7.53547e-05	-0.000120831	0.00027154	4	0.440105	0.812306	primiparity;m_hbincl;GWG;w_age;m_heightincl;m_muacincl	FALSE
CAG.196.sp002102975	Tri2, mother	Pre+Postnatal	0.000161888	-9.93987e-05	0.000423174	4	0.216557	0.73443	primiparity;m_hbincl;GWG;w_age;m_heightincl	FALSE
Unknown_QANG01	Tri2, mother	Pre+Postnatal	-2.56007e-06	-6.87696e-05	6.36495e-05	-0.469385	0.937651	0.976334	primiparity;m_bmiincl;m_hbincl;ga_days_incl;GWG;w_age;m_heightincl;m_muacincl	FALSE
UMGS874.sp900546315	Tri2, mother	Pre+Postnatal	-0.000112104	-0.000278308	5.41011e-05	-4	0.178794	0.73443	primiparity;m_bmiincl;m_hbincl;ga_days_incl;GWG;w_age;m_heightincl;m_muacincl	FALSE
Unknown_UBA5446	Tri2, mother	Pre+Postnatal	0			0
CAG.302.sp900549325	Tri2, mother	Pre+Postnatal	-2.98565e-05	-0.000108919	4.92059e-05	-4	0.447774	0.812306	primiparity;m_bmiincl;m_hbincl;ga_days_incl;w_age;m_muacincl	FALSE
Unknown_CAG.611_2	Tri2, mother	Pre+Postnatal	-7.49659e-05	-0.000233309	8.33768e-05	-4	0.343077	0.751571	m_bmiincl;ga_days_incl;w_age;m_muacincl	FALSE
Actinomyces.graevenitzii	Tri2, mother	Pre+Postnatal	0			0
Ruminococcus_C.sp000980705	Tri2, mother	Pre+Postnatal	7.65654e-06	-4.1423e-05	5.67361e-05	1.40382	0.753155	0.915227	primiparity;m_hbincl;GWG;w_age;m_heightincl	FALSE
Weissella.confusa	Tri2, mother	Pre+Postnatal	1.41762e-05	-5.16889e-05	8.00413e-05	2.59919	0.663731	0.892326	primiparity;m_bmiincl;m_hbincl;ga_days_incl;GWG;w_age;m_heightincl;m_muacincl	FALSE
Unknown_UMGS1600	Tri2, mother	Pre+Postnatal	6.10706e-05	-9.74126e-05	0.000219554	4	0.439609	0.812306	m_bmiincl;m_hbincl;m_muacincl	FALSE
Aeromonas.dhakensis	Tri2, mother	Pre+Postnatal	0			0
Unknown_UBA5920	Tri2, mother	Pre+Postnatal	-8.33669e-06	-4.2364e-05	2.56907e-05	-1.52852	0.621469	0.872968	m_bmiincl;m_hbincl;GWG;w_age;m_heightincl;m_muacincl	FALSE
Evtepia.sp004556345	Tri2, mother	Pre+Postnatal	-0.000165594	-0.000403777	7.25885e-05	-4	0.16639	0.73443	primiparity;m_bmiincl;ga_days_incl;GWG;w_age;m_heightincl;m_muacincl	FALSE
Klebsiella.quasivariicola	Tri2, mother	Pre+Postnatal	0			0
Unknown_UMGS1052	Tri2, mother	Pre+Postnatal	-1.07905e-05	-0.00018631	0.000164729	-1.97843	0.901029	0.967277	primiparity;m_bmiincl;m_hbincl;ga_days_incl;GWG;w_age;m_heightincl;m_muacincl	FALSE
Eubacterium_F.sp003491505	Tri2, mother	Pre+Postnatal	3.025e-05	-5.06245e-05	0.000111124	4	0.452071	0.812504	primiparity;m_bmiincl;GWG;w_age;m_heightincl;m_muacincl	FALSE
UBA6857.sp900555805	Tri2, mother	Pre+Postnatal	1.91139e-05	-0.000153558	0.000191786	3.5045	0.823502	0.938259	primiparity;m_hbincl;GWG;w_age	FALSE
CAG.492.sp900553225	Tri2, mother	Pre+Postnatal	-1.71679e-05	-5.2497e-05	1.81612e-05	-3.14772	0.330347	0.751571	m_bmiincl;ga_days_incl;w_age;m_heightincl;m_muacincl	FALSE
UMGS1865.sp900547725	Tri2, mother	Pre+Postnatal	0			0
Unknown_UMGS1590	Tri2, mother	Pre+Postnatal	-2.4239e-05	-5.26867e-05	4.20871e-06	-4	0.0924137	0.73443	m_bmiincl;m_hbincl;ga_days_incl;w_age;m_muacincl	FALSE
Ruminococcus.sp900540005	Tri2, mother	Pre+Postnatal	1.48345e-05	-0.000127081	0.00015675	2.71989	0.832573	0.942601	primiparity;m_bmiincl;m_hbincl;ga_days_incl;GWG;w_age;m_heightincl;m_muacincl	FALSE
CAG.170.sp900555665	Tri2, mother	Pre+Postnatal	4.14952e-06	-0.000175637	0.000183936	0.760809	0.962757	0.985236	primiparity;m_bmiincl;m_hbincl;ga_days_incl;GWG;w_age;m_heightincl;m_muacincl	FALSE
Fournierella.sp004558145	Tri2, mother	Pre+Postnatal	0.000154016	-9.45656e-05	0.000402598	4	0.216557	0.73443	primiparity;m_hbincl;GWG;w_age;m_heightincl	FALSE
CAG.269.sp000437215	Tri2, mother	Pre+Postnatal	1.20988e-05	-2.06068e-05	4.48045e-05	2.21831	0.456643	0.814039	primiparity;m_bmiincl;m_hbincl;GWG;w_age;m_heightincl;m_muacincl	FALSE
TF01.11.sp003529475	Tri2, mother	Pre+Postnatal	0			0
Ruminococcus_C.sp000437255	Tri2, mother	Pre+Postnatal	5.12112e-05	-0.000233255	0.000335677	4	0.716739	0.902872	primiparity;m_bmiincl;GWG;w_age;m_heightincl	FALSE
UMGS1124.sp900548725	Tri2, mother	Pre+Postnatal	-6.62448e-06	-2.06167e-05	7.36773e-06	-1.21459	0.343077	0.751571	m_bmiincl;ga_days_incl;w_age;m_muacincl	FALSE
Ruminococcus_H.sp003531055	Tri2, mother	Pre+Postnatal	-3.56598e-05	-0.000116434	4.51143e-05	-4	0.374851	0.77027	primiparity;m_bmiincl;m_hbincl;ga_days_incl;GWG;w_age;m_heightincl;m_muacincl	FALSE
An23.sp900544635	Tri2, mother	Pre+Postnatal	0.000151922	-9.32799e-05	0.000397124	4	0.216557	0.73443	primiparity;m_hbincl;GWG;w_age;m_heightincl	FALSE
CAG.245.sp000435175	Tri2, mother	Pre+Postnatal	-4.75606e-05	-0.000315398	0.000220277	-4	0.720198	0.902872	primiparity;m_bmiincl;ga_days_incl;GWG;w_age;m_muacincl	FALSE
Unknown_UMGS1781	Tri2, mother	Pre+Postnatal	0			0
Unknown_UMGS1773	Tri2, mother	Pre+Postnatal	7.39188e-05	-0.000116158	0.000263995	4	0.433722	0.81213	primiparity;m_bmiincl;m_hbincl;ga_days_incl;GWG;w_age;m_heightincl;m_muacincl	FALSE
Unknown_Blautia_A	Tri2, mother	Pre+Postnatal	0.000105935	-0.000101046	0.000312916	4	0.305624	0.751571	primiparity;m_bmiincl;m_hbincl;GWG;m_muacincl	FALSE
Anaerobutyricum.hallii_A	Tri2, mother	Pre+Postnatal	-1.98454e-05	-7.17725e-05	3.20818e-05	-3.63862	0.443347	0.812306	ga_days_incl;w_age;m_heightincl	FALSE
UMGS2069.sp900554955	Tri2, mother	Pre+Postnatal	-1.55779e-05	-9.38923e-05	6.27365e-05	-2.85619	0.688565	0.897899	primiparity;m_hbincl;GWG;w_age;m_muacincl	FALSE
Clostridium_P.ventriculi	Tri2, mother	Pre+Postnatal	0			0
CAG.605.sp900545005	Tri2, mother	Pre+Postnatal	1.39835e-05	-1.1003e-05	3.897e-05	2.56386	0.263069	0.748923	primiparity;m_hbincl;GWG;w_age;m_heightincl;m_muacincl	FALSE
Unknown_Selenomonas_A	Tri2, mother	Pre+Postnatal	1.3562e-05	-1.78031e-05	4.49272e-05	2.48658	0.384635	0.779339	primiparity;m_bmiincl;m_hbincl;ga_days_incl;GWG;w_age;m_heightincl;m_muacincl	FALSE
UMGS1649.sp900553785	Tri2, mother	Pre+Postnatal	0			0
AM51.8.sp900546435	Tri2, mother	Pre+Postnatal	0.000230111	-1.00402e-05	0.000470262	4	0.0597816	0.73443	primiparity;m_hbincl;GWG;w_age;m_heightincl;m_muacincl	FALSE
Senegalimassilia.sp004135645	Tri2, mother	Pre+Postnatal	-5.95527e-08	-0.000225076	0.000224957	-0.0109189	0.999573	0.999811	primiparity;m_bmiincl;m_hbincl;ga_days_incl;GWG;w_age;m_heightincl;m_muacincl	FALSE
CAG.590.sp900552885	Tri2, mother	Pre+Postnatal	-5.98052e-05	-0.000282581	0.000162971	-4	0.588294	0.871631	primiparity;m_bmiincl;m_hbincl;ga_days_incl;w_age;m_heightincl;m_muacincl	FALSE
Eubacterium_F.sp900539115	Tri2, mother	Pre+Postnatal	2.56582e-05	-9.45257e-05	0.000145842	4	0.666861	0.892326	primiparity;m_bmiincl;m_hbincl;w_age;m_heightincl;m_muacincl	FALSE
UMGS856.sp900546265	Tri2, mother	Pre+Postnatal	0			0
UBA5026.sp900552335	Tri2, mother	Pre+Postnatal	-5.97967e-06	-6.01058e-05	4.81465e-05	-1.09637	0.823384	0.938259	primiparity;m_bmiincl;m_hbincl;GWG;w_age;m_heightincl;m_muacincl	FALSE
UMGS1491.sp900554335	Tri2, mother	Pre+Postnatal	8.8369e-06	-1.83847e-05	3.60585e-05	1.62023	0.513188	0.842261	primiparity;m_bmiincl;m_hbincl;GWG;w_age;m_heightincl;m_muacincl	FALSE
Unknown_Gemella	Tri2, mother	Pre+Postnatal	0			0
Streptococcus.mitis	Tri2, mother	Pre+Postnatal	0			0
Dorea.longicatena	Tri2, mother	Pre+Postnatal	-6.89352e-05	-0.000196769	5.88984e-05	-4	0.280212	0.751571	primiparity;m_bmiincl;m_hbincl;ga_days_incl;GWG;w_age;m_muacincl	FALSE
UBA7182.sp003480725	Tri2, mother	Pre+Postnatal	0.000120438	-0.000118124	0.000359	4	0.311143	0.751571	primiparity;m_bmiincl;m_hbincl;ga_days_incl;GWG;w_age;m_heightincl;m_muacincl	FALSE
Firm.11.sp900553905	Tri2, mother	Pre+Postnatal	0.000144378	-8.86478e-05	0.000377404	4	0.216557	0.73443	primiparity;m_hbincl;GWG;w_age;m_heightincl	FALSE
Achromobacter.xylosoxidans	Tri2, mother	Pre+Postnatal	0			0
Fusicatenibacter.saccharivorans	Tri2, mother	Pre+Postnatal	5.08898e-05	-2.05723e-05	0.000122352	4	0.156823	0.73443	primiparity;m_bmiincl;m_hbincl;GWG;w_age;m_heightincl	FALSE
Niameybacter.sp900549765	Tri2, mother	Pre+Postnatal	0			0
Ruminococcus.sp002438605	Tri2, mother	Pre+Postnatal	0			0
CAG.312.sp900545715	Tri2, mother	Pre+Postnatal	0			0
Roseburia.sp003483745	Tri2, mother	Pre+Postnatal	-2.50771e-05	-0.000277464	0.00022731	-4	0.841042	0.942601	primiparity;m_bmiincl;ga_days_incl;GWG;w_age;m_muacincl	FALSE
Phocaeicola.sp002493165	Tri2, mother	Pre+Postnatal	0			0
Unknown_Bariatricus	Tri2, mother	Pre+Postnatal	4.70695e-06	-6.45487e-05	7.39626e-05	0.863014	0.890651	0.962592	primiparity;m_bmiincl;m_hbincl;ga_days_incl;GWG;w_age;m_heightincl;m_muacincl	FALSE
CAG.269.sp900556865	Tri2, mother	Pre+Postnatal	-4.01947e-05	-0.00013632	5.59307e-05	-4	0.4003	0.797168	primiparity;m_bmiincl;m_hbincl;ga_days_incl;GWG;w_age;m_heightincl;m_muacincl	FALSE
CAG.698.sp000431235	Tri2, mother	Pre+Postnatal	-5.10357e-05	-0.000170862	6.8791e-05	-4	0.393119	0.788275	m_hbincl;GWG;w_age;m_muacincl	FALSE
Unknown_UMGS1908_1	Tri2, mother	Pre+Postnatal	-5.17946e-06	-9.05236e-05	8.01647e-05	-0.949647	0.902292	0.967277	primiparity;m_bmiincl;m_hbincl;ga_days_incl;GWG;w_age;m_heightincl;m_muacincl	FALSE
Unknown_CAG.349	Tri2, mother	Pre+Postnatal	0			0
Unknown_Borkfalkia	Tri2, mother	Pre+Postnatal	0.000136077	-8.35509e-05	0.000355705	4	0.216557	0.73443	primiparity;m_hbincl;GWG;w_age;m_heightincl	FALSE
Unknown_CAG.762	Tri2, mother	Pre+Postnatal	5.80425e-05	-3.22874e-05	0.000148373	4	0.200789	0.73443	m_hbincl;GWG;m_muacincl	FALSE
UBA11517.sp003522085	Tri2, mother	Pre+Postnatal	-1.19565e-05	-3.47836e-05	1.08705e-05	-2.19221	0.294316	0.751571	m_bmiincl;m_hbincl;ga_days_incl;w_age;m_heightincl;m_muacincl	FALSE
Prevotella.sp900556825	Tri2, mother	Pre+Postnatal	0			0
Unknown_Butyricicoccaceae	Tri2, mother	Pre+Postnatal	0.000169335	-7.37656e-05	0.000412436	4	0.165609	0.73443	primiparity;m_bmiincl;m_hbincl;GWG;w_age;m_heightincl;m_muacincl	FALSE
Unknown_UMGS1470	Tri2, mother	Pre+Postnatal	2.49782e-06	-1.14845e-05	1.64802e-05	0.457972	0.71904	0.902872	primiparity;GWG;w_age;m_heightincl	FALSE
Clostridioides.difficile	Tri2, mother	Pre+Postnatal	0			0
Oscillibacter.sp900542115	Tri2, mother	Pre+Postnatal	-3.21854e-05	-0.000202039	0.000137668	-4	0.701792	0.902872	primiparity;m_bmiincl;m_hbincl;ga_days_incl;GWG;w_age;m_heightincl;m_muacincl	FALSE
Kosakonia.cowanii	Tri2, mother	Pre+Postnatal	0			0
Dorea.longicatena_B	Tri2, mother	Pre+Postnatal	-3.60798e-05	-0.00016626	9.41009e-05	-4	0.575969	0.863954	primiparity;m_bmiincl;m_hbincl;ga_days_incl;GWG;w_age;m_heightincl;m_muacincl	FALSE
Laribacter.hongkongensis	Tri2, mother	Pre+Postnatal	0			0
Unknown_UBA4855	Tri2, mother	Pre+Postnatal	5.29517e-05	-4.63699e-06	0.00011054	4	0.0703132	0.73443	primiparity;m_bmiincl;GWG;w_age;m_muacincl	FALSE
Unknown_UMGS1754	Tri2, mother	Pre+Postnatal	0			0
CAG.269.sp900555615	Tri2, mother	Pre+Postnatal	-8.88726e-06	-7.79117e-05	6.01371e-05	-1.62947	0.794598	0.933256	primiparity;m_bmiincl;m_hbincl;ga_days_incl;GWG;w_age;m_heightincl;m_muacincl	FALSE
Campylobacter_A.curvus	Tri2, mother	Pre+Postnatal	0			0
Lachnospira.sp900551945	Tri2, mother	Pre+Postnatal	6.27283e-05	-2.75447e-05	0.000153001	4	0.167169	0.73443	m_bmiincl;m_hbincl;w_age;m_muacincl	FALSE
KLE1615.sp900066985	Tri2, mother	Pre+Postnatal	-8.98675e-06	-0.000139611	0.000121638	-1.64771	0.889319	0.962592	primiparity;m_bmiincl;m_hbincl;ga_days_incl;GWG;w_age;m_heightincl;m_muacincl	FALSE
Unknown_UMGS1933	Tri2, mother	Pre+Postnatal	0			0
Ruminiclostridium_E.sp900539195	Tri2, mother	Pre+Postnatal	-3.56256e-05	-7.61095e-05	4.85827e-06	-4	0.0825744	0.73443	primiparity;m_hbincl;ga_days_incl;GWG;w_age;m_heightincl	FALSE
CAG.312.sp900545705	Tri2, mother	Pre+Postnatal	0.000125779	-0.000124451	0.00037601	4	0.31391	0.751571	primiparity;m_bmiincl;m_hbincl;GWG;m_heightincl;m_muacincl	FALSE
CAG.238.sp000435615	Tri2, mother	Pre+Postnatal	1.76082e-05	-0.000119421	0.000154638	3.22845	0.794996	0.933256	primiparity;m_bmiincl;m_hbincl;ga_days_incl;GWG;w_age;m_heightincl;m_muacincl	FALSE
Olsenella_E.sp900540955	Tri2, mother	Pre+Postnatal	9.22746e-06	-4.99219e-05	6.83768e-05	1.69184	0.753155	0.915227	primiparity;m_hbincl;GWG;w_age;m_heightincl	FALSE
Blautia_A.sp003471165	Tri2, mother	Pre+Postnatal	1.93618e-05	-8.53412e-05	0.000124065	3.54996	0.709397	0.902872	m_bmiincl;ga_days_incl;GWG;w_age;m_muacincl	FALSE
Unknown_UBA11452	Tri2, mother	Pre+Postnatal	7.27788e-05	-8.26641e-05	0.000228222	4	0.347735	0.751571	primiparity;m_bmiincl;m_hbincl;w_age;m_heightincl;m_muacincl	FALSE
Unknown_CAG.354	Tri2, mother	Pre+Postnatal	0			0
CAG.269.sp001916005	Tri2, mother	Pre+Postnatal	0.000160443	3.24596e-06	0.00031764	4	0.0457084	0.73443	primiparity;m_bmiincl;m_hbincl;GWG;w_age;m_muacincl	TRUE
UMGS1600.sp900553315	Tri2, mother	Pre+Postnatal	-4.54996e-05	-0.00031586	0.000224861	-4	0.733991	0.90849	primiparity;m_bmiincl;m_hbincl;ga_days_incl;GWG;w_age;m_muacincl	FALSE
UMGS2069.sp900557585	Tri2, mother	Pre+Postnatal	0			0
Dorea.scindens	Tri2, mother	Pre+Postnatal	0			0
UMGS1224.sp900549775	Tri2, mother	Pre+Postnatal	0			0
Beduini.sp900550005	Tri2, mother	Pre+Postnatal	7.39676e-06	-6.54832e-05	8.02767e-05	1.35619	0.837679	0.942601	primiparity;m_hbincl;ga_days_incl;GWG;w_age;m_heightincl	FALSE
UMGS1696.sp900554225	Tri2, mother	Pre+Postnatal	1.96891e-05	-5.6804e-05	9.61822e-05	3.60998	0.604001	0.872968	primiparity;m_bmiincl;m_hbincl;GWG;w_age;m_heightincl	FALSE
Unknown_UMGS1253_2	Tri2, mother	Pre+Postnatal	3.46781e-06	-6.75515e-05	7.44872e-05	0.635818	0.921313	0.969759	primiparity;m_bmiincl;m_hbincl;ga_days_incl;GWG;w_age;m_heightincl;m_muacincl	FALSE
Dorea.formicigenerans	Tri2, mother	Pre+Postnatal	3.43032e-05	-7.89843e-05	0.000147591	4	0.541744	0.850439	m_bmiincl;m_hbincl;ga_days_incl;GWG;w_age;m_heightincl;m_muacincl	FALSE
UBA1259.sp003523255	Tri2, mother	Pre+Postnatal	-8.25176e-06	-3.6599e-05	2.00954e-05	-1.51295	0.557024	0.851959	primiparity;m_bmiincl;m_hbincl;ga_days_incl;GWG;w_age;m_heightincl;m_muacincl	FALSE
Eubacterium_G.ventriosum	Tri2, mother	Pre+Postnatal	5.60618e-06	-2.47105e-05	3.59228e-05	1.02789	0.709397	0.902872	m_bmiincl;ga_days_incl;GWG;w_age;m_muacincl	FALSE
CAG.495.sp900540425	Tri2, mother	Pre+Postnatal	0.0001233	-7.57058e-05	0.000322305	4	0.216557	0.73443	primiparity;m_hbincl;GWG;w_age;m_heightincl	FALSE
Streptococcus.pseudopneumoniae_O	Tri2, mother	Pre+Postnatal	0			0
Eubacterium_F.sp000433735	Tri2, mother	Pre+Postnatal	-2.04686e-05	-0.000133024	9.20869e-05	-3.7529	0.713507	0.902872	primiparity;m_bmiincl;ga_days_incl;GWG;w_age;m_heightincl;m_muacincl	FALSE
CAG.1782.sp002349735	Tri2, mother	Pre+Postnatal	0			0
Unknown_UBA6984	Tri2, mother	Pre+Postnatal	3.6339e-05	-4.64459e-05	0.000119124	4	0.378945	0.774569	primiparity;m_hbincl;w_age;m_muacincl	FALSE
Lawsonibacter.asaccharolyticus	Tri2, mother	Pre+Postnatal	0.000121254	-7.44495e-05	0.000316957	4	0.216557	0.73443	primiparity;m_hbincl;GWG;w_age;m_heightincl	FALSE
TF01.11.sp000436755	Tri2, mother	Pre+Postnatal	-8.46103e-05	-0.00020472	3.54997e-05	-4	0.161389	0.73443	m_bmiincl;m_hbincl;ga_days_incl;w_age;m_heightincl	FALSE
Unknown_1XD42.69	Tri2, mother	Pre+Postnatal	-1.69925e-05	-4.28887e-05	8.90375e-06	-3.11555	0.191014	0.73443	m_bmiincl;m_hbincl;ga_days_incl;GWG;m_heightincl;m_muacincl	FALSE
Unknown_Dorea	Tri2, mother	Pre+Postnatal	-2.35583e-06	-0.000108934	0.000104222	-0.431939	0.964367	0.985236	primiparity;m_bmiincl;m_hbincl;ga_days_incl;GWG;w_age;m_heightincl	FALSE
Streptococcus.mitis_BB	Tri2, mother	Pre+Postnatal	0			0
CAG.492.sp000434335	Tri2, mother	Pre+Postnatal	0			0
Holdemanella.sp003458715	Tri2, mother	Pre+Postnatal	3.45878e-05	-4.31846e-05	0.00011236	4	0.37246	0.768075	primiparity;m_bmiincl;m_hbincl;w_age;m_muacincl	FALSE
Unknown_UBA1820	Tri2, mother	Pre+Postnatal	4.18e-05	-2.56651e-05	0.000109265	4	0.216557	0.73443	primiparity;m_hbincl;GWG;w_age;m_heightincl	FALSE
Unknown_CAG.822_1	Tri2, mother	Pre+Postnatal	2.25326e-05	-0.000109358	0.000154423	4	0.730585	0.908251	primiparity;ga_days_incl;GWG;w_age;m_heightincl	FALSE
Unknown_UMGS1494	Tri2, mother	Pre+Postnatal	0			0
Mailhella.sp003150275	Tri2, mother	Pre+Postnatal	5.69267e-05	-5.7786e-05	0.000171639	4	0.319316	0.751571	primiparity;m_bmiincl;m_hbincl;ga_days_incl;GWG;w_age;m_heightincl;m_muacincl	FALSE
Dorea.faecis	Tri2, mother	Pre+Postnatal	0			0
Unknown_UBA644_2	Tri2, mother	Pre+Postnatal	6.98814e-05	-7.35456e-05	0.000213308	4	0.32806	0.751571	primiparity;m_bmiincl;m_hbincl;ga_days_incl;GWG;w_age;m_heightincl;m_muacincl	FALSE
Unknown_Veillonella_A	Tri2, mother	Pre+Postnatal	0			0
Erysipelatoclostridium.sp000752095	Tri2, mother	Pre+Postnatal	8.56038e-05	-2.73599e-05	0.000198568	4	0.13294	0.73443	m_bmiincl;GWG;m_heightincl;m_muacincl	FALSE
Rs.D84.sp002437665	Tri2, mother	Pre+Postnatal	0			0
UMGS1484.sp900552285	Tri2, mother	Pre+Postnatal	-1.00951e-05	-6.28634e-05	4.26732e-05	-1.85092	0.699351	0.902872	primiparity;m_bmiincl;m_hbincl;GWG;w_age;m_heightincl;m_muacincl	FALSE
UBA733.sp900539595	Tri2, mother	Pre+Postnatal	-1.24005e-05	-3.81961e-05	1.33951e-05	-2.27362	0.335497	0.751571	m_bmiincl;m_hbincl;ga_days_incl;m_heightincl;m_muacincl	FALSE
CAG.433.sp900546245	Tri2, mother	Pre+Postnatal	2.05687e-05	-3.82255e-05	7.93628e-05	3.77124	0.481254	0.827496	primiparity;m_bmiincl;ga_days_incl;GWG;w_age;m_heightincl;m_muacincl	FALSE
UMGS1375.sp900066615	Tri2, mother	Pre+Postnatal	-7.38975e-06	-0.000132874	0.000118095	-1.3549	0.905174	0.967686	primiparity;m_bmiincl;m_hbincl;ga_days_incl;GWG;w_age;m_heightincl;m_muacincl	FALSE
MX.02.sp006954405	Tri2, mother	Pre+Postnatal	0			0
Anaeroglobus.sp900240295	Tri2, mother	Pre+Postnatal	0			0
CAG.495.sp001917125	Tri2, mother	Pre+Postnatal	0			0
Unknown_UMGS1384	Tri2, mother	Pre+Postnatal	3.83414e-05	-0.000145129	0.000221812	4	0.673981	0.894593	primiparity;m_hbincl;w_age;m_muacincl	FALSE
UMGS1045.sp900547995	Tri2, mother	Pre+Postnatal	-5.42534e-06	-4.83256e-05	3.74749e-05	-0.994728	0.79855	0.934794	primiparity;m_bmiincl;ga_days_incl;GWG;w_age;m_muacincl	FALSE
Unknown_UMGS1387	Tri2, mother	Pre+Postnatal	0			0
Sellimonas.intestinalis	Tri2, mother	Pre+Postnatal	0			0
Enterococcus_D.casseliflavus	Tri2, mother	Pre+Postnatal	0			0
Unknown_CAG.433_1	Tri2, mother	Pre+Postnatal	5.74312e-05	-8.58789e-06	0.00012345	4	0.0861136	0.73443	primiparity;m_bmiincl;w_age;m_heightincl	FALSE
Erysipelatoclostridium.spiroforme	Tri2, mother	Pre+Postnatal	0			0
UMGS1633.sp900553645	Tri2, mother	Pre+Postnatal	-5.96436e-05	-0.000185676	6.63883e-05	-4	0.342293	0.751571	primiparity;m_bmiincl;m_hbincl;ga_days_incl;GWG;w_age;m_muacincl	FALSE
CAG.303.sp000437755	Tri2, mother	Pre+Postnatal	8.04501e-05	-8.37061e-06	0.000169271	4	0.0744439	0.73443	primiparity;m_bmiincl;m_hbincl;m_heightincl	FALSE
CAG.1427.sp900553605	Tri2, mother	Pre+Postnatal	2.3992e-05	-1.83996e-05	6.63836e-05	4	0.258612	0.748923	primiparity;ga_days_incl;w_age	FALSE
Enorma.sp900538305	Tri2, mother	Pre+Postnatal	0			0
Streptococcus.parasanguinis	Tri2, mother	Pre+Postnatal	0			0
Phocaeicola.coprocola	Tri2, mother	Pre+Postnatal	0			0
Firm.10.sp004552515	Tri2, mother	Pre+Postnatal	-1.67711e-05	-4.42735e-05	1.07313e-05	-3.07496	0.224402	0.73443	m_bmiincl;m_muacincl	FALSE
Eubacterium_G.sp900548465	Tri2, mother	Pre+Postnatal	-1.74708e-05	-6.36561e-05	2.87145e-05	-3.20325	0.446252	0.812306	primiparity;m_bmiincl;m_hbincl;ga_days_incl;GWG;w_age;m_heightincl;m_muacincl	FALSE
Parvimonas.micra	Tri2, mother	Pre+Postnatal	0			0
UMGS1766.sp900554855	Tri2, mother	Pre+Postnatal	-1.06168e-05	-0.00010639	8.51569e-05	-1.94658	0.822618	0.938259	primiparity;m_bmiincl;m_hbincl;ga_days_incl;GWG;w_age;m_heightincl;m_muacincl	FALSE
Anaerobutyricum.hallii	Tri2, mother	Pre+Postnatal	-1.82113e-05	-5.66772e-05	2.02546e-05	-3.33902	0.343077	0.751571	m_bmiincl;ga_days_incl;w_age;m_muacincl	FALSE
CAG.475.sp900551145	Tri2, mother	Pre+Postnatal	6.32439e-05	-1.03174e-05	0.000136805	4	0.0894858	0.73443	primiparity;m_bmiincl;m_hbincl;GWG;w_age;m_heightincl;m_muacincl	FALSE
CAG.449.sp000432895	Tri2, mother	Pre+Postnatal	-8.24092e-06	-6.71781e-05	5.06962e-05	-1.51096	0.777621	0.923998	primiparity;m_bmiincl;m_hbincl;ga_days_incl;GWG;w_age;m_muacincl	FALSE
CAG.485.sp001701295	Tri2, mother	Pre+Postnatal	0			0
Unknown_UBA1390_1	Tri2, mother	Pre+Postnatal	-2.43052e-05	-0.000144153	9.55422e-05	-4	0.682293	0.896089	primiparity;m_bmiincl;m_hbincl;ga_days_incl;GWG;w_age;m_heightincl	FALSE
UBA10677.sp003533505	Tri2, mother	Pre+Postnatal	0			0
Unknown_Rs.D84_2	Tri2, mother	Pre+Postnatal	6.88571e-05	-1.49388e-06	0.000139208	4	0.0547689	0.73443	primiparity;m_bmiincl;m_hbincl;GWG;w_age;m_heightincl;m_muacincl	FALSE
Pauljensenia.sp001838165	Tri2, mother	Pre+Postnatal	0			0
Unknown_NC2004	Tri2, mother	Pre+Postnatal	-8.74394e-06	-0.000225882	0.000208394	-1.60319	0.935137	0.975467	primiparity;m_bmiincl;m_hbincl;ga_days_incl;GWG;w_age;m_heightincl	FALSE
Staphylococcus.aureus	Tri2, mother	Pre+Postnatal	0			0
Blautia.sp000436935	Tri2, mother	Pre+Postnatal	0			0
Clostridium.tertium	Tri2, mother	Pre+Postnatal	0			0
Clostridium.sp000435835	Tri2, mother	Pre+Postnatal	6.54428e-06	-3.10569e-05	4.41454e-05	1.19989	0.725277	0.905426	primiparity;m_bmiincl;m_hbincl;ga_days_incl;GWG;m_heightincl;m_muacincl	FALSE
TF01.11.sp003149875	Tri2, mother	Pre+Postnatal	2.0651e-05	-8.10932e-05	0.000122395	3.78634	0.681754	0.896089	primiparity;m_bmiincl;m_hbincl;ga_days_incl;GWG;w_age;m_heightincl;m_muacincl	FALSE
Succinatimonas.hippei	Tri2, mother	Pre+Postnatal	0			0
CAG.354.sp900555085	Tri2, mother	Pre+Postnatal	1.06194e-06	-5.3069e-05	5.51929e-05	0.194706	0.968373	0.987074	primiparity;m_bmiincl;m_hbincl;ga_days_incl;GWG;m_heightincl;m_muacincl	FALSE
Blautia_A.sp900120195	Tri2, mother	Pre+Postnatal	1.77687e-06	-3.22195e-05	3.57733e-05	0.325787	0.915879	0.969759	primiparity;m_bmiincl;m_hbincl;GWG;w_age;m_heightincl;m_muacincl	FALSE
CAG.1427.sp000435475	Tri2, mother	Pre+Postnatal	-9.55845e-06	-2.97478e-05	1.06309e-05	-1.75253	0.343077	0.751571	m_bmiincl;ga_days_incl;w_age;m_muacincl	FALSE
Gleimia.europaea_A	Tri2, mother	Pre+Postnatal	0			0
Enterocloster.sp900538485	Tri2, mother	Pre+Postnatal	0			0
Flavonifractor.sp900549795	Tri2, mother	Pre+Postnatal	4.69997e-05	-2.88577e-05	0.000122857	4	0.216557	0.73443	primiparity;m_hbincl;GWG;w_age;m_heightincl	FALSE
UMGS1491.sp900552265	Tri2, mother	Pre+Postnatal	-3.85751e-05	-9.53055e-05	1.81553e-05	-4	0.175615	0.73443	m_bmiincl;m_hbincl;ga_days_incl;GWG;w_age;m_heightincl;m_muacincl	FALSE
Dorea.sp900543315	Tri2, mother	Pre+Postnatal	0			0
UBA9502.sp003478505	Tri2, mother	Pre+Postnatal	-0.000110141	-0.000248762	2.84808e-05	-4	0.115386	0.73443	primiparity;m_bmiincl;m_hbincl;ga_days_incl;GWG;w_age;m_muacincl	FALSE
Duodenibacillus.sp003472385	Tri2, mother	Pre+Postnatal	0			0
Blautia_A.massiliensis	Tri2, mother	Pre+Postnatal	-4.9005e-05	-0.000123688	2.56778e-05	-4	0.191014	0.73443	m_bmiincl;m_hbincl;ga_days_incl;GWG;m_heightincl;m_muacincl	FALSE
UMGS1663.sp900553865	Tri2, mother	Pre+Postnatal	-1.08139e-05	-3.36549e-05	1.20272e-05	-1.98271	0.343077	0.751571	m_bmiincl;ga_days_incl;w_age;m_muacincl	FALSE
UMGS1470.sp900552105	Tri2, mother	Pre+Postnatal	-4.48405e-05	-0.000163053	7.33721e-05	-4	0.445398	0.812306	primiparity;m_bmiincl;ga_days_incl;GWG;w_age;m_heightincl;m_muacincl	FALSE
CAG.826.sp000437235	Tri2, mother	Pre+Postnatal	0			0
Phoenicibacter.congonensis	Tri2, mother	Pre+Postnatal	-9.90737e-06	-5.78828e-05	3.80681e-05	-1.8165	0.676531	0.894593	primiparity;m_bmiincl;m_hbincl;ga_days_incl;GWG;w_age;m_heightincl;m_muacincl	FALSE
Ruminococcus_C.sp900545285	Tri2, mother	Pre+Postnatal	-5.97068e-05	-0.000130731	1.13171e-05	-4	0.0965923	0.73443	primiparity;ga_days_incl;GWG;w_age;m_heightincl;m_muacincl	FALSE
Ligilactobacillus.agilis	Tri2, mother	Pre+Postnatal	1.07961e-05	-9.98991e-06	3.15821e-05	1.97945	0.298625	0.751571	primiparity;m_bmiincl;ga_days_incl;GWG;w_age	FALSE
UMGS1865.sp900555785	Tri2, mother	Pre+Postnatal	4.56999e-05	-4.77582e-05	0.000139158	4	0.327047	0.751571	primiparity;m_bmiincl;m_hbincl;GWG;w_age;m_muacincl	FALSE
Unknown_RUG131	Tri2, mother	Pre+Postnatal	-1.72037e-05	-6.61987e-05	3.17913e-05	-3.15428	0.480673	0.827496	m_hbincl;GWG;w_age;m_muacincl	FALSE
UMGS1491.sp900554775	Tri2, mother	Pre+Postnatal	-1.96936e-05	-0.000137085	9.76978e-05	-3.61079	0.734799	0.908521	primiparity;m_bmiincl;m_hbincl;GWG;w_age;m_heightincl;m_muacincl	FALSE
CAG.1427.sp000434775	Tri2, mother	Pre+Postnatal	-4.44368e-05	-0.000195072	0.000106198	-4	0.552811	0.851959	primiparity;m_bmiincl;ga_days_incl;w_age;m_muacincl	FALSE
Enterobacter.cloacae_J	Tri2, mother	Pre+Postnatal	-4.84284e-05	-0.000122232	2.53756e-05	-4	0.191014	0.73443	m_bmiincl;m_hbincl;ga_days_incl;GWG;m_heightincl;m_muacincl	FALSE
Unknown_Brachyspira	Tri2, mother	Pre+Postnatal	0			0
Aggregatibacter.segnis	Tri2, mother	Pre+Postnatal	0			0
Unknown_UBA7868	Tri2, mother	Pre+Postnatal	-1.34647e-05	-8.31451e-05	5.62158e-05	-2.46873	0.696202	0.902872	primiparity;m_bmiincl;m_hbincl;ga_days_incl;GWG;w_age;m_heightincl;m_muacincl	FALSE
Dysgonomonas.gadei	Tri2, mother	Pre+Postnatal	0			0
CAG.882.sp900545175	Tri2, mother	Pre+Postnatal	6.24319e-05	-0.000103091	0.000227955	4	0.448655	0.812306	primiparity;m_bmiincl;GWG;w_age;m_muacincl	FALSE
Fannyhessea.vaginae	Tri2, mother	Pre+Postnatal	0			0
Unknown_CAG.1427	Tri2, mother	Pre+Postnatal	1.5874e-05	-1.78946e-05	4.96425e-05	2.91047	0.34616	0.751571	primiparity;ga_days_incl;w_age;m_heightincl;m_muacincl	FALSE
UBA9506.sp003506415	Tri2, mother	Pre+Postnatal	0			0
Eisenbergiella.massiliensis	Tri2, mother	Pre+Postnatal	8.57462e-05	-5.2648e-05	0.000224141	4	0.216557	0.73443	primiparity;m_hbincl;GWG;w_age;m_heightincl	FALSE
Prevotella.corporis	Tri2, mother	Pre+Postnatal	-2.38314e-05	-6.01499e-05	1.24872e-05	-4	0.191014	0.73443	m_bmiincl;m_hbincl;ga_days_incl;GWG;m_heightincl;m_muacincl	FALSE
Clostridium.sp001916075	Tri2, mother	Pre+Postnatal	-1.43805e-05	-6.52283e-05	3.64674e-05	-2.63664	0.568596	0.859557	primiparity;m_bmiincl;ga_days_incl;GWG;w_age;m_heightincl;m_muacincl	FALSE
Romboutsia.timonensis	Tri2, mother	Pre+Postnatal	-3.21566e-05	-0.00011535	5.10372e-05	-4	0.436493	0.81213	primiparity;m_bmiincl;m_hbincl;ga_days_incl;GWG;w_age;m_heightincl;m_muacincl	FALSE
Blautia_A.sp000436615	Tri2, mother	Pre+Postnatal	3.72653e-05	-2.53677e-05	9.98982e-05	4	0.234689	0.73443	primiparity;m_bmiincl;m_hbincl;GWG;w_age;m_muacincl	FALSE
Unknown_CAG.822_2	Tri2, mother	Pre+Postnatal	-6.07318e-06	-1.76679e-05	5.52157e-06	-1.11351	0.294316	0.751571	m_bmiincl;m_hbincl;ga_days_incl;w_age;m_heightincl;m_muacincl	FALSE
UBA1227.sp900545655	Tri2, mother	Pre+Postnatal	1.4012e-05	-0.00011257	0.000140594	2.56908	0.823502	0.938259	primiparity;m_hbincl;GWG;w_age	FALSE
GCA.900066575.sp900553635	Tri2, mother	Pre+Postnatal	3.26459e-06	-4.11743e-05	4.77035e-05	0.598559	0.881871	0.960462	primiparity;m_bmiincl;m_hbincl;ga_days_incl;GWG;w_age;m_heightincl;m_muacincl	FALSE
CAG.238.sp900542245	Tri2, mother	Pre+Postnatal	-2.16806e-05	-0.000165603	0.000122241	-3.97512	0.760719	0.915227	primiparity;m_bmiincl;m_hbincl;ga_days_incl;GWG;w_age;m_heightincl;m_muacincl	FALSE
Fusobacterium_C.gonidiaformans	Tri2, mother	Pre+Postnatal	0			0
Aeromonas.caviae	Tri2, mother	Pre+Postnatal	0			0
Neisseria.gonorrhoeae	Tri2, mother	Pre+Postnatal	0			0
Blautia_A.sp900066165	Tri2, mother	Pre+Postnatal	-3.66764e-05	-9.25706e-05	1.92178e-05	-4	0.191014	0.73443	m_bmiincl;m_hbincl;ga_days_incl;GWG;m_heightincl;m_muacincl	FALSE
Allisonella.histaminiformans	Tri2, mother	Pre+Postnatal	-6.89682e-06	-4.59123e-05	3.21187e-05	-1.26452	0.720898	0.902872	primiparity;m_bmiincl;m_hbincl;ga_days_incl;GWG;w_age;m_heightincl;m_muacincl	FALSE
TM7x.sp900555265	Tri2, mother	Pre+Postnatal	0			0
Unknown_UBA1758	Tri2, mother	Pre+Postnatal	9.704e-06	-6.69651e-05	8.63731e-05	1.77922	0.798721	0.934794	primiparity;m_bmiincl;ga_days_incl;m_heightincl	FALSE
Unknown_Intestinimonas	Tri2, mother	Pre+Postnatal	7.9633e-05	-4.88945e-05	0.00020816	4	0.216557	0.73443	primiparity;m_hbincl;GWG;w_age;m_heightincl	FALSE
Unknown_UBA7182	Tri2, mother	Pre+Postnatal	0.00013428	-7.86006e-06	0.00027642	4	0.0632972	0.73443	primiparity;m_bmiincl;GWG;m_heightincl;m_muacincl	FALSE
Unknown_UMGS1872	Tri2, mother	Pre+Postnatal	7.80603e-05	-4.79289e-05	0.00020405	4	0.216557	0.73443	primiparity;m_hbincl;GWG;w_age;m_heightincl	FALSE
Unknown_UBA791	Tri2, mother	Pre+Postnatal	2.3749e-05	-0.0001007	0.000148198	4	0.700321	0.902872	primiparity;m_bmiincl;m_hbincl;GWG;w_age;m_heightincl	FALSE
CAG.269.sp001915995	Tri2, mother	Pre+Postnatal	4.68362e-05	-4.07408e-05	0.000134413	4	0.284751	0.751571	primiparity;m_hbincl;GWG;w_age;m_muacincl	FALSE
Ruminococcus_D.sp000434695	Tri2, mother	Pre+Postnatal	-0.000126515	-0.0002653	1.22713e-05	-4	0.0725615	0.73443	primiparity;m_hbincl;ga_days_incl;GWG;w_age;m_heightincl;m_muacincl	FALSE
CAG.45.sp000438375	Tri2, mother	Pre+Postnatal	0			0
Unknown_UBA7597	Tri2, mother	Pre+Postnatal	-6.33609e-05	-0.00018627	5.95486e-05	-4	0.301558	0.751571	primiparity;m_bmiincl;m_hbincl;ga_days_incl;GWG;m_heightincl;m_muacincl	FALSE
UMGS1773.sp900554945	Tri2, mother	Pre+Postnatal	-1.38241e-05	-4.27995e-05	1.51512e-05	-2.53464	0.338776	0.751571	m_bmiincl;m_hbincl;ga_days_incl;GWG;m_heightincl;m_muacincl	FALSE
Unknown_UBA1997	Tri2, mother	Pre+Postnatal	0			0
Faecalicoccus.pleomorphus	Tri2, mother	Pre+Postnatal	0			0
Unknown_UMGS1908_2	Tri2, mother	Pre+Postnatal	-7.121e-05	-0.000192422	5.00025e-05	-4	0.240513	0.740542	m_bmiincl;ga_days_incl;GWG;w_age;m_heightincl;m_muacincl	FALSE
Unknown_Anaerovoracaceae	Tri2, mother	Pre+Postnatal	8.26445e-05	-5.62546e-05	0.000221544	4	0.234103	0.73443	primiparity;m_bmiincl;m_hbincl;ga_days_incl;GWG;w_age;m_heightincl;m_muacincl	FALSE
CAG.288.sp000437395	Tri2, mother	Pre+Postnatal	8.74856e-06	-8.09527e-06	2.55924e-05	1.60404	0.298625	0.751571	primiparity;m_bmiincl;ga_days_incl;GWG;w_age	FALSE
Unknown_TANB77	Tri2, mother	Pre+Postnatal	0			0
Oscillibacter.welbionis	Tri2, mother	Pre+Postnatal	5.9099e-05	-3.62867e-05	0.000154485	4	0.216557	0.73443	primiparity;m_hbincl;GWG;w_age;m_heightincl	FALSE
Unknown_NK3B98	Tri2, mother	Pre+Postnatal	8.42799e-05	8.01234e-06	0.000160548	4	0.0314252	0.73443	primiparity;m_bmiincl;m_hbincl;ga_days_incl;GWG;w_age;m_heightincl;m_muacincl	TRUE
Unknown_UMGS1375	Tri2, mother	Pre+Postnatal	1.48415e-05	-3.07208e-05	6.04038e-05	2.72117	0.511755	0.842261	primiparity;m_bmiincl;m_hbincl;GWG;w_age;m_heightincl;m_muacincl	FALSE
Bariatricus.comes	Tri2, mother	Pre+Postnatal	-4.24711e-05	-9.0734e-05	5.79179e-06	-4	0.0825744	0.73443	primiparity;m_hbincl;ga_days_incl;GWG;w_age;m_heightincl	FALSE
Unknown_CAG.793	Tri2, mother	Pre+Postnatal	-4.61822e-05	-0.000144316	5.19513e-05	-4	0.344951	0.751571	primiparity;m_bmiincl;m_hbincl;ga_days_incl;w_age;m_heightincl;m_muacincl	FALSE
CAG.269.sp900556345	Tri2, mother	Pre+Postnatal	7.36634e-05	-5.0145e-05	0.000197472	4	0.234689	0.73443	primiparity;m_bmiincl;m_hbincl;GWG;w_age;m_muacincl	FALSE
Negativibacillus.sp900547015	Tri2, mother	Pre+Postnatal	5.35571e-06	-4.86818e-05	5.93933e-05	0.981962	0.84113	0.942601	primiparity;m_bmiincl;m_hbincl;ga_days_incl;GWG;w_age;m_heightincl;m_muacincl	FALSE
Turicimonas.muris	Tri2, mother	Pre+Postnatal	0			0
UBA4716.sp900556575	Tri2, mother	Pre+Postnatal	2.54389e-05	-0.000130506	0.000181384	4	0.741599	0.911108	primiparity;m_bmiincl;m_hbincl;ga_days_incl;GWG;w_age;m_heightincl;m_muacincl	FALSE
Ruminococcus_C.sp000433635	Tri2, mother	Pre+Postnatal	8.45096e-06	-3.69238e-05	5.38257e-05	1.54947	0.706642	0.902872	primiparity;m_bmiincl;m_hbincl;ga_days_incl;GWG;w_age;m_heightincl;m_muacincl	FALSE
Unknown_UBA9502	Tri2, mother	Pre+Postnatal	1.02807e-05	-4.02932e-05	6.08546e-05	1.88495	0.681294	0.896089	primiparity;m_bmiincl;m_hbincl;ga_days_incl;GWG;w_age;m_heightincl;m_muacincl	FALSE
Unknown_UBA6345	Tri2, mother	Pre+Postnatal	-1.71307e-06	-4.33205e-05	3.98944e-05	-0.314089	0.933619	0.975467	primiparity;m_bmiincl;m_hbincl;ga_days_incl;GWG;w_age;m_heightincl;m_muacincl	FALSE
Unknown_UMGS1502	Tri2, mother	Pre+Postnatal	-7.89247e-05	-0.000156195	-1.65414e-06	-4	0.0455497	0.73443	primiparity;ga_days_incl;GWG;w_age;m_heightincl	TRUE
Unknown_UBA644_1	Tri2, mother	Pre+Postnatal	0			0
Blautia_A.sp900066335	Tri2, mother	Pre+Postnatal	0			0
Alistipes.sp900083545	Tri2, mother	Pre+Postnatal	0			0
Unknown_UMGS1815	Tri2, mother	Pre+Postnatal	-2.67275e-05	-0.000114914	6.14594e-05	-4	0.541718	0.850439	primiparity;m_bmiincl;GWG;w_age;m_heightincl;m_muacincl	FALSE
Dorea.sp000433215	Tri2, mother	Pre+Postnatal	0			0
UBA7182.sp003481535	Tri2, mother	Pre+Postnatal	9.97414e-05	-4.54629e-05	0.000244946	4	0.171161	0.73443	primiparity;m_bmiincl;m_hbincl;ga_days_incl;GWG;w_age;m_heightincl;m_muacincl	FALSE
Unknown_Ruminococcus_C	Tri2, mother	Pre+Postnatal	1.3252e-05	-3.18211e-05	5.8325e-05	2.42973	0.553105	0.851959	primiparity;m_bmiincl;m_hbincl;ga_days_incl;GWG;w_age;m_heightincl;m_muacincl	FALSE
AM07.15.sp003477405	Tri2, mother	Pre+Postnatal	0			0
Turicibacter.sp001543345	Tri2, mother	Pre+Postnatal	-3.25777e-05	-0.000108897	4.37421e-05	-4	0.392081	0.787554	primiparity;m_hbincl;ga_days_incl;GWG	FALSE
CAG.465.sp000433135	Tri2, mother	Pre+Postnatal	6.65401e-05	-4.5296e-05	0.000178376	4	0.234689	0.73443	primiparity;m_bmiincl;m_hbincl;GWG;w_age;m_muacincl	FALSE
Anaerobiospirillum.succiniciproducens	Tri2, mother	Pre+Postnatal	0			0
UBA11490.sp003524095	Tri2, mother	Pre+Postnatal	-7.44786e-06	-2.86589e-05	1.37631e-05	-1.36556	0.480673	0.827496	m_hbincl;GWG;w_age;m_muacincl	FALSE
UBA3388.sp004551865	Tri2, mother	Pre+Postnatal	0			0
Unknown_Victivallaceae	Tri2, mother	Pre+Postnatal	3.46863e-05	-1.59933e-05	8.5366e-05	4	0.173646	0.73443	primiparity;m_hbincl;w_age	FALSE
UMGS687.sp900544595	Tri2, mother	Pre+Postnatal	2.55606e-05	-2.01125e-05	7.12336e-05	4	0.263069	0.748923	primiparity;m_hbincl;GWG;w_age;m_heightincl;m_muacincl	FALSE
Unknown_Gastranaerophilales	Tri2, mother	Pre+Postnatal	9.17718e-05	-5.54191e-06	0.000189086	4	0.0636876	0.73443	primiparity;m_bmiincl;m_hbincl;GWG;w_age;m_heightincl;m_muacincl	FALSE
CAG.81.sp900066055	Tri2, mother	Pre+Postnatal	-5.39575e-05	-0.000108577	6.61493e-07	-4	0.0526872	0.73443	m_bmiincl;m_hbincl;ga_days_incl;m_muacincl	FALSE
CAG.81.sp900556965	Tri2, mother	Pre+Postnatal	-4.311e-05	-0.00017203	8.58099e-05	-4	0.500303	0.836962	primiparity;m_bmiincl;m_hbincl;ga_days_incl;GWG;w_age;m_heightincl;m_muacincl	FALSE
Prevotella.timonensis	Tri2, mother	Pre+Postnatal	-2.33192e-05	-5.1313e-05	4.6745e-06	-4	0.0997801	0.73443	m_bmiincl;m_hbincl;m_muacincl	FALSE
Franconibacter.helveticus	Tri2, mother	Pre+Postnatal	0			0
Bilophila.sp900553145	Tri2, mother	Pre+Postnatal	6.2019e-05	-3.80796e-05	0.000162118	4	0.216557	0.73443	primiparity;m_hbincl;GWG;w_age;m_heightincl	FALSE
Unknown_UMGS124	Tri2, mother	Pre+Postnatal	-7.45482e-06	-2.30801e-05	8.17047e-06	-1.36683	0.338776	0.751571	m_bmiincl;m_hbincl;ga_days_incl;GWG;m_heightincl;m_muacincl	FALSE
Selenomonas_C.sp002351185	Tri2, mother	Pre+Postnatal	0			0
CAG.345.sp000433315	Tri2, mother	Pre+Postnatal	2.26603e-05	-5.05984e-07	4.58265e-05	4	0.0549199	0.73443	primiparity;m_bmiincl;m_hbincl;GWG;w_age;m_muacincl	FALSE
Blautia_A.sp900066505	Tri2, mother	Pre+Postnatal	0			0
CAG.873.sp900555715	Tri2, mother	Pre+Postnatal	0			0
Veillonella.tobetsuensis	Tri2, mother	Pre+Postnatal	0			0
Staphylococcus.hominis	Tri2, mother	Pre+Postnatal	0			0
Lawsonibacter.sp900549405	Tri2, mother	Pre+Postnatal	-0.000120884	-0.000238522	-3.24702e-06	-4	0.0443592	0.73443	primiparity;m_bmiincl;m_hbincl;ga_days_incl;GWG;w_age;m_heightincl;m_muacincl	TRUE
UMGS124.sp900539345	Tri2, mother	Pre+Postnatal	0			0
Oribacterium.sp004554245	Tri2, mother	Pre+Postnatal	0			0
Dorea.sp900550865	Tri2, mother	Pre+Postnatal	1.10095e-05	-7.49453e-06	2.95135e-05	2.01858	0.234689	0.73443	primiparity;m_bmiincl;m_hbincl;GWG;w_age;m_muacincl	FALSE
Peptostreptococcus.anaerobius	Tri2, mother	Pre+Postnatal	0			0
CAG.269.sp900557115	Tri2, mother	Pre+Postnatal	8.2495e-05	5.07881e-06	0.000159911	4	0.0374508	0.73443	primiparity;m_bmiincl;GWG;w_age;m_heightincl	TRUE
Unknown_UBA11540	Tri2, mother	Pre+Postnatal	-7.00194e-06	-3.51422e-05	2.11383e-05	-1.2838	0.615412	0.872968	primiparity;m_bmiincl;m_hbincl;ga_days_incl;GWG;w_age;m_heightincl;m_muacincl	FALSE
Negativicoccus.succinicivorans	Tri2, mother	Pre+Postnatal	0			0
UBA5884.sp900551505	Tri2, mother	Pre+Postnatal	-4.66335e-05	-0.000144377	5.11103e-05	-4	0.338776	0.751571	m_bmiincl;m_hbincl;ga_days_incl;GWG;m_heightincl;m_muacincl	FALSE
Intestinibacter.bartlettii	Tri2, mother	Pre+Postnatal	1.03191e-05	-5.8054e-05	7.86921e-05	1.89198	0.760286	0.915227	primiparity;m_bmiincl;m_hbincl;ga_days_incl;GWG;w_age;m_heightincl;m_muacincl	FALSE
Ruminococcus_C.sp000437175	Tri2, mother	Pre+Postnatal	3.91329e-06	-3.59383e-05	4.37649e-05	0.717497	0.842731	0.942601	primiparity;m_bmiincl;m_hbincl;ga_days_incl;GWG;w_age;m_muacincl	FALSE
Unknown_UBA1390_2	Tri2, mother	Pre+Postnatal	4.98342e-05	-1.48016e-05	0.00011447	4	0.126646	0.73443	primiparity;m_hbincl;m_heightincl	FALSE
Limosilactobacillus.reuteri	Tri2, mother	Pre+Postnatal	0			0
Firm.11.sp900540045	Tri2, mother	Pre+Postnatal	5.65753e-05	-3.47371e-05	0.000147888	4	0.216557	0.73443	primiparity;m_hbincl;GWG;w_age;m_heightincl	FALSE
Unknown_UBA1191	Tri2, mother	Pre+Postnatal	2.98134e-05	-1.83053e-05	7.7932e-05	4	0.216557	0.73443	primiparity;m_hbincl;GWG;w_age;m_heightincl	FALSE
Unknown_SCN.57.10	Tri2, mother	Pre+Postnatal	0			0
Unknown_SFJ001	Tri2, mother	Pre+Postnatal	4.71249e-05	-8.63131e-05	0.000180563	4	0.477139	0.827496	primiparity;m_bmiincl;m_hbincl;ga_days_incl;GWG;w_age;m_muacincl	FALSE
Prevotella.sp900548585	Tri2, mother	Pre+Postnatal	0			0
Unknown_UMGS1623	Tri2, mother	Pre+Postnatal	3.12191e-05	-1.91685e-05	8.16068e-05	4	0.216557	0.73443	primiparity;m_hbincl;GWG;w_age;m_heightincl	FALSE
RUG131.sp900549975	Tri2, mother	Pre+Postnatal	7.18424e-06	-3.97064e-05	5.40749e-05	1.31722	0.757219	0.915227	primiparity;m_bmiincl;GWG;w_age;m_heightincl;m_muacincl	FALSE
Unknown_UMGS973	Tri2, mother	Pre+Postnatal	8.62806e-05	-1.96341e-05	0.000192195	4	0.106708	0.73443	primiparity;m_bmiincl;m_hbincl;ga_days_incl;GWG;w_age;m_heightincl;m_muacincl	FALSE
Parvimonas.sp001553085	Tri2, mother	Pre+Postnatal	0			0
Plesiomonas.shigelloides	Tri2, mother	Pre+Postnatal	0			0
Dialister.sp900547785	Tri2, mother	Pre+Postnatal	0			0
TM7x.sp900555425	Tri2, mother	Pre+Postnatal	0			0
Unknown_Monoglobales_A	Tri2, mother	Pre+Postnatal	-3.90617e-05	-0.000122824	4.47007e-05	-4	0.349962	0.751724	m_bmiincl;ga_days_incl;w_age;m_heightincl;m_muacincl	FALSE
CAG.312.sp000438015	Tri2, mother	Pre+Postnatal	3.08041e-05	-1.89136e-05	8.05218e-05	4	0.216557	0.73443	primiparity;m_hbincl;GWG;w_age;m_heightincl	FALSE
Lactobacillus.delbrueckii	Tri2, mother	Pre+Postnatal	1.28285e-05	-1.18705e-05	3.75275e-05	2.35208	0.298625	0.751571	primiparity;m_bmiincl;ga_days_incl;GWG;w_age	FALSE
Unknown_UMGS1293	Tri2, mother	Pre+Postnatal	0			0
Enterocloster.sp000431375	Tri2, mother	Pre+Postnatal	-2.73631e-05	-8.51593e-05	3.04331e-05	-4	0.343077	0.751571	m_bmiincl;ga_days_incl;w_age;m_muacincl	FALSE
UMGS1603.sp900553265	Tri2, mother	Pre+Postnatal	-3.70746e-05	-9.22428e-05	1.80935e-05	-4	0.18057	0.73443	m_bmiincl;m_hbincl;ga_days_incl;GWG;w_age;m_heightincl;m_muacincl	FALSE
Blautia_A.sp900066205	Tri2, mother	Pre+Postnatal	0			0
UMGS1933.sp900556455	Tri2, mother	Pre+Postnatal	0			0
UMGS2070.sp900557655	Tri2, mother	Pre+Postnatal	3.08768e-06	-4.37735e-05	4.99489e-05	0.566123	0.894074	0.964703	primiparity;m_bmiincl;m_hbincl;GWG;w_age;m_heightincl;m_muacincl	FALSE
Lancefieldella.sp000564995	Tri2, mother	Pre+Postnatal	0			0
Unknown_UBA7160	Tri2, mother	Pre+Postnatal	-4.89174e-05	-0.000123467	2.56318e-05	-4	0.191014	0.73443	m_bmiincl;m_hbincl;ga_days_incl;GWG;m_heightincl;m_muacincl	FALSE
UBA3818.sp900557155	Tri2, mother	Pre+Postnatal	3.41382e-05	-7.86947e-05	0.000146971	4	0.542066	0.850439	primiparity;m_bmiincl;m_hbincl;GWG;w_age;m_heightincl;m_muacincl	FALSE
Weissella.cibaria	Tri2, mother	Pre+Postnatal	0			0
UBA1191.sp900549125	Tri2, mother	Pre+Postnatal	-1.66159e-05	-5.08078e-05	1.75759e-05	-3.04651	0.330632	0.751571	m_hbincl;ga_days_incl;w_age;m_heightincl	FALSE
Unknown_Evtepia	Tri2, mother	Pre+Postnatal	-2.39838e-05	-0.000103945	5.59773e-05	-4	0.545171	0.850731	primiparity;m_bmiincl;m_hbincl;ga_days_incl;GWG;w_age;m_heightincl;m_muacincl	FALSE
CAG.448.sp000433415	Tri2, mother	Pre+Postnatal	1.57243e-05	-1.0704e-05	4.21526e-05	2.88303	0.234689	0.73443	primiparity;m_bmiincl;m_hbincl;GWG;w_age;m_muacincl	FALSE
Unknown_CAG.138	Tri2, mother	Pre+Postnatal	4.66402e-05	-3.66992e-05	0.000129979	4	0.263069	0.748923	primiparity;m_hbincl;GWG;w_age;m_heightincl;m_muacincl	FALSE
Blautia_A.sp003477525	Tri2, mother	Pre+Postnatal	4.89407e-05	-3.33155e-05	0.000131197	4	0.234689	0.73443	primiparity;m_bmiincl;m_hbincl;GWG;w_age;m_muacincl	FALSE
Parabacteroides.chinchillae	Tri2, mother	Pre+Postnatal	0			0
TF01.11.sp001414325	Tri2, mother	Pre+Postnatal	1.87846e-05	-1.46309e-05	5.22001e-05	3.44413	0.261774	0.748923	primiparity;m_hbincl;m_heightincl	FALSE
Bifidobacterium.sp002884815	Tri2, mother	Pre+Postnatal	0			0
Anaerotruncus.colihominis	Tri2, mother	Pre+Postnatal	0			0
Unknown_Mesosutterella	Tri2, mother	Pre+Postnatal	0			0
Terrisporobacter.sp900557165	Tri2, mother	Pre+Postnatal	0			0
Unknown_CAG.917	Tri2, mother	Pre+Postnatal	4.66012e-05	-1.7823e-05	0.000111025	4	0.150584	0.73443	primiparity;m_bmiincl;m_hbincl;GWG;w_age;m_muacincl	FALSE
Lactococcus.lactis	Tri2, mother	Pre+Postnatal	0			0
CAG.475.sp900550855	Tri2, mother	Pre+Postnatal	-1.86089e-05	-5.7613e-05	2.03953e-05	-3.41191	0.338776	0.751571	m_bmiincl;m_hbincl;ga_days_incl;GWG;m_heightincl;m_muacincl	FALSE
Unknown_CAG.631	Tri2, mother	Pre+Postnatal	0			0
CAG.269.sp001916035	Tri2, mother	Pre+Postnatal	0			0
Eubacterium_G.sp000434315	Tri2, mother	Pre+Postnatal	0			0
TM7x.sp900555675	Tri2, mother	Pre+Postnatal	0			0
Streptococcus.sp004166885	Tri2, mother	Pre+Postnatal	0			0
Unknown_UBA4651	Tri2, mother	Pre+Postnatal	2.48964e-05	-1.63055e-05	6.60982e-05	4	0.227359	0.73443	primiparity;m_bmiincl;m_hbincl;GWG;w_age;m_heightincl;m_muacincl	FALSE
Unknown_Marvinbryantia	Tri2, mother	Pre+Postnatal	0			0
Peptoniphilus_A.phoceensis	Tri2, mother	Pre+Postnatal	0			0
QAMI01.sp003150395	Tri2, mother	Pre+Postnatal	0			0
Finegoldia.magna_F	Tri2, mother	Pre+Postnatal	0			0
NK3B98.sp900545815	Tri2, mother	Pre+Postnatal	0			0
Unknown_UBA10677	Tri2, mother	Pre+Postnatal	3.2653e-05	-3.02147e-05	9.55208e-05	4	0.298625	0.751571	primiparity;m_bmiincl;ga_days_incl;GWG;w_age	FALSE
Unknown_UBA71	Tri2, mother	Pre+Postnatal	0			0
CAG.269.sp001916055	Tri2, mother	Pre+Postnatal	1.18224e-05	-1.47609e-05	3.84056e-05	2.16762	0.37246	0.768075	primiparity;m_bmiincl;m_hbincl;w_age;m_muacincl	FALSE
Unknown_Oscillospirales	Tri2, mother	Pre+Postnatal	-2.66048e-05	-0.00010034	4.71301e-05	-4	0.467717	0.81657	primiparity;m_bmiincl;m_hbincl;ga_days_incl;w_age;m_heightincl;m_muacincl	FALSE
Blautia_A.sp003474435	Tri2, mother	Pre+Postnatal	0			0
Eubacterium_G.sp900550135	Tri2, mother	Pre+Postnatal	-4.20525e-05	-0.00010614	2.20347e-05	-4	0.191014	0.73443	m_bmiincl;m_hbincl;ga_days_incl;GWG;m_heightincl;m_muacincl	FALSE
Roseburia.sp900548205	Tri2, mother	Pre+Postnatal	0			0
UBA9502.sp900555625	Tri2, mother	Pre+Postnatal	9.65888e-06	-7.24658e-05	9.17835e-05	1.77094	0.812008	0.938259	primiparity;m_bmiincl;m_hbincl;ga_days_incl;GWG;w_age;m_heightincl;m_muacincl	FALSE
Aggregatibacter.segnis_A	Tri2, mother	Pre+Postnatal	0			0
Blautia_A.sp900548245	Tri2, mother	Pre+Postnatal	2.60763e-05	-1.88842e-05	7.10369e-05	4	0.24697	0.743284	m_bmiincl;GWG;m_heightincl;m_muacincl	FALSE
UMGS687.sp900551705	Tri2, mother	Pre+Postnatal	3.45224e-05	-1.8833e-05	8.78779e-05	4	0.197748	0.73443	primiparity;m_bmiincl;m_muacincl	FALSE
Unknown_CAG.465_2	Tri2, mother	Pre+Postnatal	0			0
TM7x.sp900555885	Tri2, mother	Pre+Postnatal	0			0
UBA1685.sp002320595	Tri2, mother	Pre+Postnatal	0			0
Marvinbryantia.sp900544685	Tri2, mother	Pre+Postnatal	0			0
UBA9502.sp003480315	Tri2, mother	Pre+Postnatal	-2.47474e-05	-7.70188e-05	2.7524e-05	-4	0.343077	0.751571	m_bmiincl;ga_days_incl;w_age;m_muacincl	FALSE
UMGS1071.sp900542375	Tri2, mother	Pre+Postnatal	0			0
Massiliomicrobiota.sp002160815	Tri2, mother	Pre+Postnatal	0			0
CAG.312.sp001917305	Tri2, mother	Pre+Postnatal	0			0
CAG.1427.sp000435675	Tri2, mother	Pre+Postnatal	0			0
UMGS966.sp900547185	Tri2, mother	Pre+Postnatal	0			0
Unknown_GCA.900066575	Tri2, mother	Pre+Postnatal	4.08492e-05	-4.24484e-05	0.000124147	4	0.325672	0.751571	primiparity;m_bmiincl;m_hbincl;GWG;w_age;m_muacincl	FALSE
TM7x.sp900556885	Tri2, mother	Pre+Postnatal	0			0
Unknown_QALA01	Tri2, mother	Pre+Postnatal	1.52785e-05	-4.42295e-05	7.47864e-05	2.80129	0.604912	0.872968	primiparity;m_hbincl;ga_days_incl;GWG;w_age;m_muacincl	FALSE
Collinsella.bouchesdurhonensis	Tri2, mother	Pre+Postnatal	0			0
Unknown_Fusicatenibacter	Tri2, mother	Pre+Postnatal	0			0
Eubacterium_G.sp000435815	Tri2, mother	Pre+Postnatal	0			0
Succinivibrio.sp900555115	Tri2, mother	Pre+Postnatal	-2.7414e-05	-5.80534e-05	3.22532e-06	-4	0.0778814	0.73443	m_bmiincl;m_hbincl;m_heightincl;m_muacincl	FALSE
Enterobacter.mori	Tri2, mother	Pre+Postnatal	0			0
UMGS1670.sp900553995	Tri2, mother	Pre+Postnatal	3.79384e-05	-5.74982e-05	0.000133375	4	0.424076	0.81213	primiparity;m_bmiincl;m_hbincl;ga_days_incl;GWG;m_heightincl;m_muacincl	FALSE
UBA737.sp900547095	Tri2, mother	Pre+Postnatal	0			0
Marvinbryantia.sp900066075	Tri2, mother	Pre+Postnatal	0			0
UBA10677.sp900543755	Tri2, mother	Pre+Postnatal	1.32185e-05	-1.04011e-05	3.68381e-05	2.4236	0.263069	0.748923	primiparity;m_hbincl;GWG;w_age;m_heightincl;m_muacincl	FALSE
UBA4285.sp900545225	Tri2, mother	Pre+Postnatal	0			0
Unknown_QANA01	Tri2, mother	Pre+Postnatal	-7.29364e-06	-2.23029e-05	7.71561e-06	-1.33728	0.330347	0.751571	m_bmiincl;ga_days_incl;w_age;m_heightincl;m_muacincl	FALSE
Coprobacter.secundus	Tri2, mother	Pre+Postnatal	-2.77895e-05	-7.30644e-05	1.74854e-05	-4	0.220534	0.73443	m_bmiincl;ga_days_incl;GWG;w_age;m_heightincl;m_muacincl	FALSE
Odoribacter.massiliensis	Tri2, mother	Pre+Postnatal	0			0
CAG.269.sp900552555	Tri2, mother	Pre+Postnatal	0			0
Hungatella_A.sp003478355	Tri2, mother	Pre+Postnatal	0			0
Unknown_W2P13.069	Tri2, mother	Pre+Postnatal	2.19324e-05	-1.43643e-05	5.82291e-05	4	0.227359	0.73443	primiparity;m_bmiincl;m_hbincl;GWG;w_age;m_heightincl;m_muacincl	FALSE
Lancefieldella.sp900555335	Tri2, mother	Pre+Postnatal	0			0
Sneathia.sanguinegens	Tri2, mother	Pre+Postnatal	0			0
UMGS1781.sp900555075	Tri2, mother	Pre+Postnatal	0			0
Unknown_UMGS1253_1	Tri2, mother	Pre+Postnatal	0			0
TM7x.sp900556355	Tri2, mother	Pre+Postnatal	0			0
Streptococcus.gordonii	Tri2, mother	Pre+Postnatal	0			0
Unknown_KA00274	Tri2, mother	Pre+Postnatal	0			0
Unknown_UBA1784	Tri2, mother	Pre+Postnatal	0			0
Clostridium.saudiense	Tri2, mother	Pre+Postnatal	-3.00402e-05	-7.58209e-05	1.57405e-05	-4	0.191014	0.73443	m_bmiincl;m_hbincl;ga_days_incl;GWG;m_heightincl;m_muacincl	FALSE
Unknown_MARSEILLE.P3954	Tri2, mother	Pre+Postnatal	3.90444e-05	-2.108e-06	8.01968e-05	4	0.0622618	0.73443	primiparity;w_age;m_muacincl	FALSE
Holdemania.massiliensis	Tri2, mother	Pre+Postnatal	3.62019e-05	-2.22279e-05	9.46318e-05	4	0.216557	0.73443	primiparity;m_hbincl;GWG;w_age;m_heightincl	FALSE
Dermabacter.hominis	Tri2, mother	Pre+Postnatal	0			0
Ruminococcus_A.sp003011855	Tri2, mother	Pre+Postnatal	0			0
Unknown_Enorma	Tri2, mother	Pre+Postnatal	0			0
Alistipes.sp900541585	Tri2, mother	Pre+Postnatal	0			0
Sneathia.amnii	Tri2, mother	Pre+Postnatal	0			0
CAG.521.sp000437635	Tri2, mother	Pre+Postnatal	0			0
Unknown_Firm.08	Tri2, mother	Pre+Postnatal	4.92188e-06	-1.20799e-05	2.19237e-05	0.902421	0.559888	0.851959	primiparity;m_bmiincl;m_hbincl;GWG;w_age;m_heightincl	FALSE
Unknown_Clostridia_A	Tri2, mother	Pre+Postnatal	0			0
TM7x.sp900557595	Tri2, mother	Pre+Postnatal	0			0
CAG.1427.sp000436075	Tri2, mother	Pre+Postnatal	0			0
Erysipelatoclostridium.sp900544435	Tri2, mother	Pre+Postnatal	0			0
Unknown_UBA5884	Tri2, mother	Pre+Postnatal	-3.08753e-05	-8.81317e-05	2.63812e-05	-4	0.280223	0.751571	m_bmiincl;m_hbincl;ga_days_incl;GWG;w_age;m_heightincl;m_muacincl	FALSE
Porphyromonas.asaccharolytica	Tri2, mother	Pre+Postnatal	0			0
Enterococcus_C.asini	Tri2, mother	Pre+Postnatal	0			0
Odoribacter.sp900544025	Tri2, mother	Pre+Postnatal	3.31651e-05	-2.03633e-05	8.66935e-05	4	0.216557	0.73443	primiparity;m_hbincl;GWG;w_age;m_heightincl	FALSE
Gemella.morbillorum	Tri2, mother	Pre+Postnatal	0			0
Phytobacter.massiliensis	Tri2, mother	Pre+Postnatal	-3.20441e-05	-8.08787e-05	1.67905e-05	-4	0.191014	0.73443	m_bmiincl;m_hbincl;ga_days_incl;GWG;m_heightincl;m_muacincl	FALSE
Methanomethylophilus.alvus	Tri2, mother	Pre+Postnatal	0			0
UMGS1994.sp900553945	Tri2, mother	Pre+Postnatal	-2.40338e-05	-7.47979e-05	2.67303e-05	-4	0.343077	0.751571	m_bmiincl;ga_days_incl;w_age;m_muacincl	FALSE
UBA1820.sp003150615	Tri2, mother	Pre+Postnatal	-3.12148e-05	-8.20702e-05	1.96406e-05	-4	0.220534	0.73443	m_bmiincl;ga_days_incl;GWG;w_age;m_heightincl;m_muacincl	FALSE
Intestinibacter.sp900540355	Tri2, mother	Pre+Postnatal	-3.1088e-05	-7.84656e-05	1.62896e-05	-4	0.191014	0.73443	m_bmiincl;m_hbincl;ga_days_incl;GWG;m_heightincl;m_muacincl	FALSE
Prevotella.colorans	Tri2, mother	Pre+Postnatal	0			0
Parabacteroides.bouchesdurhonensis	Tri2, mother	Pre+Postnatal	0			0
Peptostreptococcus.stomatis	Tri2, mother	Pre+Postnatal	0			0
Unknown_Ruminococcus_D	Tri2, mother	Pre+Postnatal	1.4863e-05	-1.13801e-05	4.11061e-05	2.72512	0.257193	0.748923	primiparity;m_bmiincl;m_hbincl;ga_days_incl;GWG;m_heightincl;m_muacincl	FALSE
Lactobacillus.amylovorus	Tri2, mother	Pre+Postnatal	-5.84762e-06	-5.87785e-05	4.70833e-05	-1.07215	0.823384	0.938259	primiparity;m_bmiincl;m_hbincl;GWG;w_age;m_heightincl;m_muacincl	FALSE
CAG.475.sp900549225	Tri2, mother	Pre+Postnatal	2.3739e-06	-5.40112e-05	5.8759e-05	0.435251	0.932318	0.975467	m_bmiincl;m_hbincl;GWG;w_age;m_heightincl	FALSE
UMGS1901.sp900553755	Tri2, mother	Pre+Postnatal	-1.01382e-05	-3.1552e-05	1.12756e-05	-1.85882	0.343077	0.751571	m_bmiincl;ga_days_incl;w_age;m_muacincl	FALSE
Unknown_UBA9845	Tri2, mother	Pre+Postnatal	2.11122e-05	-1.97123e-05	6.19366e-05	3.87089	0.300687	0.751571	primiparity;m_bmiincl;GWG;m_heightincl;m_muacincl	FALSE
Limosilactobacillus.pontis	Tri2, mother	Pre+Postnatal	0			0
Coprobacillus.cateniformis	Tri2, mother	Pre+Postnatal	1.37586e-05	-3.37681e-05	6.12853e-05	2.52262	0.559888	0.851959	primiparity;m_bmiincl;m_hbincl;GWG;w_age;m_heightincl	FALSE
Leuconostoc.sp900554745	Tri2, mother	Pre+Postnatal	0			0
Unknown_OM05.12	Tri2, mother	Pre+Postnatal	0			0
UMGS416.sp900542005	Tri2, mother	Pre+Postnatal	3.07686e-05	-1.88919e-05	8.04291e-05	4	0.216557	0.73443	primiparity;m_hbincl;GWG;w_age;m_heightincl	FALSE
Enterobacter.cloacae_M	Tri2, mother	Pre+Postnatal	0			0
QALS01.sp900552625	Tri2, mother	Pre+Postnatal	3.05371e-05	-1.87497e-05	7.98239e-05	4	0.216557	0.73443	primiparity;m_hbincl;GWG;w_age;m_heightincl	FALSE
Coprococcus_A.catus	Tri2, mother	Pre+Postnatal	-2.5559e-05	-6.05843e-05	9.46633e-06	-4	0.14744	0.73443	ga_days_incl;GWG;w_age;m_muacincl	FALSE
Prevotella.disiens	Tri2, mother	Pre+Postnatal	0			0
Mogibacterium.sp900315625	Tri2, mother	Pre+Postnatal	0			0
QALS01.sp003150575	Tri2, mother	Pre+Postnatal	2.99051e-05	-1.83617e-05	7.81719e-05	4	0.216557	0.73443	primiparity;m_hbincl;GWG;w_age;m_heightincl	FALSE
Anaerococcus.obesiensis	Tri2, mother	Pre+Postnatal	0			0
UMGS1375.sp900551235	Tri2, mother	Pre+Postnatal	0			0
Cloacibacillus.porcorum	Tri2, mother	Pre+Postnatal	-1.8382e-05	-9.22998e-05	5.55358e-05	-3.37032	0.615945	0.872968	m_bmiincl;m_hbincl;ga_days_incl;GWG;w_age;m_heightincl;m_muacincl	FALSE
Unknown_CAG.312_2	Tri2, mother	Pre+Postnatal	0			0
Sutterella.parvirubra	Tri2, mother	Pre+Postnatal	0			0
CAG.485.sp900550645	Tri2, mother	Pre+Postnatal	0			0
Firm.07.sp900548735	Tri2, mother	Pre+Postnatal	0			0
Unknown_UMGS1071	Tri2, mother	Pre+Postnatal	0			0
Unknown_UBA1448	Tri2, mother	Pre+Postnatal	-8.88028e-06	-5.28958e-05	3.51352e-05	-1.62819	0.683842	0.897108	m_bmiincl;m_hbincl;ga_days_incl;GWG;w_age;m_heightincl;m_muacincl	FALSE
Peptoniphilus_A.lacrimalis	Tri2, mother	Pre+Postnatal	0			0
Veillonella.denticariosi	Tri2, mother	Pre+Postnatal	2.57066e-05	-1.80843e-05	6.94975e-05	4	0.241383	0.740542	primiparity;m_bmiincl;m_hbincl;w_age	FALSE
Unknown_UBA7096	Tri2, mother	Pre+Postnatal	0			0
Campylobacter_B.hominis	Tri2, mother	Pre+Postnatal	0			0
Catenibacterium.mitsuokai	Tri2, mother	Pre+Postnatal	0			0
Unknown_UBA11957	Tri2, mother	Pre+Postnatal	-4.08657e-05	-9.85731e-05	1.68416e-05	-4	0.158888	0.73443	primiparity;m_bmiincl;m_hbincl;ga_days_incl;GWG;w_age;m_muacincl	FALSE
UBA5578.sp900553395	Tri2, mother	Pre+Postnatal	0			0
UMGS1293.sp900550385	Tri2, mother	Pre+Postnatal	0			0
Unknown_CAG.45	Tri2, mother	Pre+Postnatal	1.23907e-05	-3.04108e-05	5.51923e-05	2.27182	0.559888	0.851959	primiparity;m_bmiincl;m_hbincl;GWG;w_age;m_heightincl	FALSE
Akkermansia.sp900545155	Tri2, mother	Pre+Postnatal	1.23714e-05	-3.03635e-05	5.51063e-05	2.26828	0.559888	0.851959	primiparity;m_bmiincl;m_hbincl;GWG;w_age;m_heightincl	FALSE
Providencia.alcalifaciens_A	Tri2, mother	Pre+Postnatal	0			0
Enterocloster.sp900547035	Tri2, mother	Pre+Postnatal	2.76213e-05	-1.69594e-05	7.22019e-05	4	0.216557	0.73443	primiparity;m_hbincl;GWG;w_age;m_heightincl	FALSE
Unknown_UMGS1518	Tri2, mother	Pre+Postnatal	2.75879e-05	-1.69389e-05	7.21147e-05	4	0.216557	0.73443	primiparity;m_hbincl;GWG;w_age;m_heightincl	FALSE
Peptoniphilus_A.senegalensis	Tri2, mother	Pre+Postnatal	0			0
Lactococcus.petauri	Tri2, mother	Pre+Postnatal	0			0
Unknown_Ruminococcus	Tri2, mother	Pre+Postnatal	-1.24444e-05	-3.87295e-05	1.38407e-05	-2.28167	0.343077	0.751571	m_bmiincl;ga_days_incl;w_age;m_muacincl	FALSE
CAG.557.sp000435275	Tri2, mother	Pre+Postnatal	6.14269e-06	-3.93052e-05	5.15906e-05	1.12625	0.785227	0.929181	primiparity;m_bmiincl;m_hbincl;w_age;m_muacincl	FALSE
Unknown_14.Feb	Tri2, mother	Pre+Postnatal	0			0
Unknown_Flavonifractor	Tri2, mother	Pre+Postnatal	0			0
Coprococcus_A.sp900548825	Tri2, mother	Pre+Postnatal	0			0
CAG.274.sp900545305	Tri2, mother	Pre+Postnatal	0			0
Prevotella.amnii	Tri2, mother	Pre+Postnatal	0			0
Clostridium.celatum	Tri2, mother	Pre+Postnatal	-2.50983e-05	-6.33478e-05	1.31511e-05	-4	0.191014	0.73443	m_bmiincl;m_hbincl;ga_days_incl;GWG;m_heightincl;m_muacincl	FALSE
Unknown_UMGS1783_1	Tri2, mother	Pre+Postnatal	0			0
UMGS1908.sp900556185	Tri2, mother	Pre+Postnatal	0			0
Unknown_UBA7488	Tri2, mother	Pre+Postnatal	0			0
Coprobacter.fastidiosus	Tri2, mother	Pre+Postnatal	2.47596e-05	-1.52024e-05	6.47217e-05	4	0.216557	0.73443	primiparity;m_hbincl;GWG;w_age;m_heightincl	FALSE
Unknown_Butyricimonas	Tri2, mother	Pre+Postnatal	0			0
Unknown_UMGS1975	Tri2, mother	Pre+Postnatal	-5.73203e-06	-1.77463e-05	6.2823e-06	-1.05096	0.338776	0.751571	m_bmiincl;m_hbincl;ga_days_incl;GWG;m_heightincl;m_muacincl	FALSE
Unknown_UBA7867	Tri2, mother	Pre+Postnatal	0			0
Unknown_Anaerobutyricum	Tri2, mother	Pre+Postnatal	0			0
Eubacterium_I.ramulus_A	Tri2, mother	Pre+Postnatal	0			0
Unknown_KLE1615	Tri2, mother	Pre+Postnatal	0			0
Prevotella.buccalis	Tri2, mother	Pre+Postnatal	0			0
Unknown_UBA1775	Tri2, mother	Pre+Postnatal	7.76415e-06	-9.69395e-06	2.52223e-05	1.42355	0.37246	0.768075	primiparity;m_bmiincl;m_hbincl;w_age;m_muacincl	FALSE
Phocaeicola.sartorii	Tri2, mother	Pre+Postnatal	0			0
Unknown_Atopobiaceae	Tri2, mother	Pre+Postnatal	4.2678e-06	-1.88113e-05	2.73469e-05	0.782496	0.709397	0.902872	m_bmiincl;ga_days_incl;GWG;w_age;m_muacincl	FALSE
CAG.475.sp002478945	Tri2, mother	Pre+Postnatal	0			0
Unknown_Anaerotignum	Tri2, mother	Pre+Postnatal	0			0
CAG.269.sp900554565	Tri2, mother	Pre+Postnatal	8.75527e-06	-1.72023e-05	3.47128e-05	1.60527	0.496624	0.834743	primiparity;m_bmiincl;m_hbincl;ga_days_incl;GWG;w_age;m_heightincl;m_muacincl	FALSE
UBA5446.sp900544295	Tri2, mother	Pre+Postnatal	2.30431e-05	-1.41484e-05	6.02346e-05	4	0.216557	0.73443	primiparity;m_hbincl;GWG;w_age;m_heightincl	FALSE
UBA2903.sp002349565	Tri2, mother	Pre+Postnatal	0			0
Bacillus.subtilis	Tri2, mother	Pre+Postnatal	0			0
Unknown_UBA7702	Tri2, mother	Pre+Postnatal	-1.75949e-05	-4.02476e-05	5.05785e-06	-3.226	0.124049	0.73443	m_bmiincl;m_muacincl	FALSE
Anaerostipes.sp900066705	Tri2, mother	Pre+Postnatal	0			0
Blautia_A.sp900551715	Tri2, mother	Pre+Postnatal	0			0
Unknown_CAG.776	Tri2, mother	Pre+Postnatal	0			0
Unknown_Fournierella	Tri2, mother	Pre+Postnatal	2.09949e-05	-1.28908e-05	5.48806e-05	3.84939	0.216557	0.73443	primiparity;m_hbincl;GWG;w_age;m_heightincl	FALSE
Dorea.sp900066555	Tri2, mother	Pre+Postnatal	0			0
Aggregatibacter.aphrophilus	Tri2, mother	Pre+Postnatal	0			0
Unknown_UBA4675	Tri2, mother	Pre+Postnatal	0			0
CAG.267.sp001917135	Tri2, mother	Pre+Postnatal	0			0
Eubacterium_I.sp900546495	Tri2, mother	Pre+Postnatal	0			0
UBA866.sp900543295	Tri2, mother	Pre+Postnatal	0			0
Porphyromonas_A.sp001808555	Tri2, mother	Pre+Postnatal	0			0
Unknown_Merdibacter	Tri2, mother	Pre+Postnatal	0			0
Phascolarctobacterium.sp900545535	Tri2, mother	Pre+Postnatal	0			0
Limosilactobacillus.sp900557215	Tri2, mother	Pre+Postnatal	0			0
CAG.269.sp900553985	Tri2, mother	Pre+Postnatal	1.86672e-05	-1.14616e-05	4.87961e-05	3.42261	0.216557	0.73443	primiparity;m_hbincl;GWG;w_age;m_heightincl	FALSE
Helicobacter_C.magdeburgensis	Tri2, mother	Pre+Postnatal	-6.89315e-06	-3.50285e-05	2.12422e-05	-1.26385	0.621469	0.872968	m_bmiincl;m_hbincl;GWG;w_age;m_heightincl;m_muacincl	FALSE
Fusobacterium.animalis	Tri2, mother	Pre+Postnatal	0			0
Holdemania.filiformis	Tri2, mother	Pre+Postnatal	0			0
Unknown_UBA8514	Tri2, mother	Pre+Postnatal	1.96878e-07	-2.89953e-05	2.9389e-05	0.0360972	0.989114	0.995203	primiparity;m_bmiincl;m_hbincl;ga_days_incl;GWG;w_age;m_heightincl;m_muacincl	FALSE
Unknown_Anaerofustaceae	Tri2, mother	Pre+Postnatal	0			0
Ruthenibacterium.sp900546885	Tri2, mother	Pre+Postnatal	1.81437e-05	-1.11402e-05	4.74277e-05	3.32663	0.216557	0.73443	primiparity;m_hbincl;GWG;w_age;m_heightincl	FALSE
Unknown_QAKD01	Tri2, mother	Pre+Postnatal	-8.8044e-06	-2.32425e-05	5.63369e-06	-1.61428	0.224402	0.73443	m_bmiincl;m_muacincl	FALSE
Akkermansia.sp900548895	Tri2, mother	Pre+Postnatal	3.10848e-06	-2.49731e-05	3.119e-05	0.569935	0.823502	0.938259	primiparity;m_hbincl;GWG;w_age	FALSE
Unknown_DTUO25	Tri2, mother	Pre+Postnatal	0			0
Unknown_UMGS1858	Tri2, mother	Pre+Postnatal	0			0
Levyella.massiliensis	Tri2, mother	Pre+Postnatal	0			0
Unknown_UBA4068	Tri2, mother	Pre+Postnatal	1.59184e-05	-1.82887e-05	5.01255e-05	2.91862	0.350286	0.751724	primiparity;m_bmiincl;m_hbincl;ga_days_incl;w_age;m_heightincl;m_muacincl	FALSE
Lactococcus.garvieae_B	Tri2, mother	Pre+Postnatal	0			0
Slackia.exigua	Tri2, mother	Pre+Postnatal	0			0
Unknown_Christensenellaceae	Tri2, mother	Pre+Postnatal	-2.01646e-05	-4.03825e-05	5.3369e-08	-3.69715	0.0505753	0.73443	m_bmiincl;m_hbincl;ga_days_incl;m_muacincl	FALSE
Unknown_Bacteroidales	Tri2, mother	Pre+Postnatal	0			0
Turicibacter.sanguinis	Tri2, mother	Pre+Postnatal	-1.65117e-05	-4.16752e-05	8.65184e-06	-3.0274	0.191014	0.73443	m_bmiincl;m_hbincl;ga_days_incl;GWG;m_heightincl;m_muacincl	FALSE
Fusobacterium.polymorphum	Tri2, mother	Pre+Postnatal	0			0
Unknown_Mediterraneibacter_A	Tri2, mother	Pre+Postnatal	0			0
UBA1394.sp900554975	Tri2, mother	Pre+Postnatal	7.75691e-06	-9.68491e-06	2.51987e-05	1.42222	0.37246	0.768075	primiparity;m_bmiincl;m_hbincl;w_age;m_muacincl	FALSE
Unknown_SFEB01	Tri2, mother	Pre+Postnatal	8.47563e-07	-1.64262e-05	1.81213e-05	0.1554	0.920932	0.969759	primiparity;m_bmiincl;m_hbincl;ga_days_incl;GWG;w_age;m_heightincl;m_muacincl	FALSE
UMGS1518.sp900552575	Tri2, mother	Pre+Postnatal	0			0
Eubacterium_G.sp000432355	Tri2, mother	Pre+Postnatal	0			0
UBA7868.sp002501285	Tri2, mother	Pre+Postnatal	-1.07722e-05	-3.78246e-05	1.62802e-05	-1.97507	0.423299	0.81213	primiparity;m_bmiincl;ga_days_incl;GWG;w_age;m_heightincl;m_muacincl	FALSE
Peptococcus.niger	Tri2, mother	Pre+Postnatal	0			0
Streptococcus.anginosus	Tri2, mother	Pre+Postnatal	0			0
Haemophilus_D.pittmaniae	Tri2, mother	Pre+Postnatal	0			0
Porphyromonas_A.somerae	Tri2, mother	Pre+Postnatal	0			0
Mediterraneibacter_A.butyricigenes	Tri2, mother	Pre+Postnatal	0			0
UBA11471.sp000434215	Tri2, mother	Pre+Postnatal	0			0
Dialister_A.pneumosintes	Tri2, mother	Pre+Postnatal	0			0
Clostridium.sp900539375	Tri2, mother	Pre+Postnatal	0			0
Gabonibacter.massiliensis	Tri2, mother	Pre+Postnatal	0			0
Unknown_Lachnospirales	Tri2, mother	Pre+Postnatal	0			0
UBA1191.sp900066305	Tri2, mother	Pre+Postnatal	0			0
Rothia.mucilaginosa_A	Tri2, mother	Pre+Postnatal	3.60407e-06	-1.58857e-05	2.30939e-05	0.660801	0.709397	0.902872	m_bmiincl;ga_days_incl;GWG;w_age;m_muacincl	FALSE
Unknown_UBA1394	Tri2, mother	Pre+Postnatal	6.18571e-06	-1.51817e-05	2.75532e-05	1.13414	0.559888	0.851959	primiparity;m_bmiincl;m_hbincl;GWG;w_age;m_heightincl	FALSE
Unknown_GCA.900066995	Tri2, mother	Pre+Postnatal	0			0
Bifidobacterium.vaginale	Tri2, mother	Pre+Postnatal	0			0
Unknown_Christensenellales	Tri2, mother	Pre+Postnatal	-1.01736e-05	-3.34364e-05	1.30892e-05	-1.86532	0.379674	0.774695	primiparity;m_bmiincl;m_hbincl;ga_days_incl;w_age;m_heightincl;m_muacincl	FALSE
QAKW01.sp003343605	Tri2, mother	Pre+Postnatal	0			0
UBA1174.sp900556855	Tri2, mother	Pre+Postnatal	5.73422e-06	-1.40736e-05	2.55421e-05	1.05136	0.559888	0.851959	primiparity;m_bmiincl;m_hbincl;GWG;w_age;m_heightincl	FALSE
Streptococcus.mutans	Tri2, mother	Pre+Postnatal	0			0
Stomatobaculum.naviforme	Tri2, mother	Pre+Postnatal	0			0
Unknown_Eggerthellaceae	Tri2, mother	Pre+Postnatal	1.26833e-05	-7.78752e-06	3.31541e-05	2.32547	0.216557	0.73443	primiparity;m_hbincl;GWG;w_age;m_heightincl	FALSE
UBA5884.sp002431975	Tri2, mother	Pre+Postnatal	0			0
UMGS1901.sp900556135	Tri2, mother	Pre+Postnatal	0			0
X28L.sp000177555	Tri2, mother	Pre+Postnatal	0			0
Streptococcus.sp002300045	Tri2, mother	Pre+Postnatal	0			0
Alloscardovia.omnicolens	Tri2, mother	Pre+Postnatal	0			0
UBA5394.sp900542615	Tri2, mother	Pre+Postnatal	0			0
UMGS75.sp900538885	Tri2, mother	Pre+Postnatal	0			0
Unknown_UMGS687	Tri2, mother	Pre+Postnatal	7.17807e-06	-1.18171e-05	2.61732e-05	1.31609	0.447809	0.812306	primiparity;m_hbincl;GWG;m_heightincl;m_muacincl	FALSE
Porphyromonas.sp900538385	Tri2, mother	Pre+Postnatal	0			0
Eubacterium_I.sp900557275	Tri2, mother	Pre+Postnatal	0			0
Unknown_UMGS1572	Tri2, mother	Pre+Postnatal	1.54721e-06	-1.24301e-05	1.55245e-05	0.28368	0.823502	0.938259	primiparity;m_hbincl;GWG;w_age	FALSE
Streptococcus.constellatus	Tri2, mother	Pre+Postnatal	0			0
Porphyromonas.sp900539155	Tri2, mother	Pre+Postnatal	0			0
Unknown_UBA1709	Tri2, mother	Pre+Postnatal	0			0
Ezakiella.coagulans	Tri2, mother	Pre+Postnatal	0			0
DNF00809.sp001552935	Tri2, mother	Pre+Postnatal	0			0
Streptococcus.anginosus_C	Tri2, mother	Pre+Postnatal	0			0
Streptococcus.rubneri	Tri2, mother	Pre+Postnatal	0			0
Olsenella_E.sp003150175	Tri2, mother	Pre+Postnatal	0			0
Lactobacillus.iners	Tri2, mother	Pre+Postnatal	2.76321e-06	-9.73521e-06	1.52616e-05	0.506631	0.655795	0.890501	primiparity;m_bmiincl;m_hbincl;w_age;m_heightincl;m_muacincl	FALSE
Unknown_UBA7862	Tri2, mother	Pre+Postnatal	0			0
Porphyromonas.endodontalis	Tri2, mother	Pre+Postnatal	0			0
Haemophilus_A.sputorum	Tri2, mother	Pre+Postnatal	-7.27857e-06	-1.8371e-05	3.81384e-06	-1.33452	0.191014	0.73443	m_bmiincl;m_hbincl;ga_days_incl;GWG;m_heightincl;m_muacincl	FALSE
Unknown_UBA1183	Tri2, mother	Pre+Postnatal	0			0
QAND01.sp003150225	Tri2, mother	Pre+Postnatal	0			0
Unknown_SFWF01	Tri2, mother	Pre+Postnatal	0			0
Bifidobacterium.infantis	Tri3, mother	Pre+Postnatal	0			0
Escherichia.coli	Tri3, mother	Pre+Postnatal	-0.00358294	-0.0097414	0.00257553	-4	0.251896	0.827735	primiparity;m_bmiincl;m_hbincl;ga_days_incl;GWG;w_age;m_heightincl;m_muacincl	FALSE
Bacteroides.fragilis_A	Tri3, mother	Pre+Postnatal	-0.00196534	-0.00607101	0.00214033	-4	0.345442	0.827735	primiparity;m_bmiincl;m_hbincl;ga_days_incl;GWG;w_age;m_heightincl;m_muacincl	FALSE
Klebsiella.pneumoniae	Tri3, mother	Pre+Postnatal	0.00121382	-0.00242162	0.00484927	4	0.510172	0.867993	primiparity;m_bmiincl;ga_days_incl;w_age;m_heightincl;m_muacincl	FALSE
Parolsenella.uli_B	Tri3, mother	Pre+Postnatal	0			0
Bacteroides.fragilis	Tri3, mother	Pre+Postnatal	-0.0067855	-0.0166246	0.00305356	-4	0.174864	0.827735	m_bmiincl;m_hbincl;ga_days_incl;w_age;m_heightincl;m_muacincl	FALSE
Enterococcus_B.faecium	Tri3, mother	Pre+Postnatal	-1.5973e-05	-4.64615e-05	1.45156e-05	-2.92862	0.302056	0.827735	primiparity;ga_days_incl;w_age	FALSE
Parabacteroides.goldsteinii	Tri3, mother	Pre+Postnatal	-0.000156611	-0.000637286	0.000324065	-4	0.520416	0.867993	m_bmiincl;m_hbincl;ga_days_incl;GWG;w_age;m_heightincl;m_muacincl	FALSE
Escherichia.albertii	Tri3, mother	Pre+Postnatal	0			0
Megasphaera.sp001546855	Tri3, mother	Pre+Postnatal	0			0
Veillonella_A.sp000431435	Tri3, mother	Pre+Postnatal	0			0
Phocaeicola.dorei	Tri3, mother	Pre+Postnatal	-0.00117542	-0.0029413	0.000590468	-4	0.190283	0.827735	primiparity;m_hbincl;ga_days_incl;w_age;m_heightincl	FALSE
Prevotella.sp900544825	Tri3, mother	Pre+Postnatal	0.00231912	-0.00392986	0.00856809	4	0.464205	0.857816	primiparity;m_bmiincl;m_hbincl;ga_days_incl;GWG;w_age;m_heightincl;m_muacincl	FALSE
Prevotella.sp900290275	Tri3, mother	Pre+Postnatal	-0.00214257	-0.00562284	0.0013377	-4	0.225524	0.827735	m_hbincl;ga_days_incl;GWG;w_age;m_heightincl;m_muacincl	FALSE	FALSE	TRUE	0.572222
Unknown_Prevotella	Tri3, mother	Pre+Postnatal	0.0030807	-0.0142495	0.0204109	4	0.725686	0.92714	primiparity;m_bmiincl;m_hbincl;ga_days_incl;GWG;w_age;m_heightincl;m_muacincl	FALSE
Prevotella.sp900548535	Tri3, mother	Pre+Postnatal	-0.00417539	-0.0194617	0.0111109	-4	0.58995	0.893525	primiparity;ga_days_incl;GWG;w_age;m_heightincl;m_muacincl	FALSE
Victivallis.vadensis	Tri3, mother	Pre+Postnatal	1.93828e-06	-4.83373e-05	5.22139e-05	0.355381	0.93933	0.97883	primiparity;m_bmiincl;m_hbincl;ga_days_incl;GWG;w_age;m_heightincl;m_muacincl	FALSE
Akkermansia.muciniphila_C	Tri3, mother	Pre+Postnatal	0			0
Campylobacter_D.coli	Tri3, mother	Pre+Postnatal	0			0
Streptococcus.sp000187445	Tri3, mother	Pre+Postnatal	0			0
Unknown_Campylobacter	Tri3, mother	Pre+Postnatal	-0.000155158	-0.000574424	0.000264109	-4	0.465468	0.857816	primiparity;m_bmiincl;m_hbincl;ga_days_incl;GWG;w_age;m_heightincl;m_muacincl	FALSE
Flavonifractor.plautii	Tri3, mother	Pre+Postnatal	-8.75307e-06	-3.46645e-05	1.71583e-05	-1.60486	0.505244	0.867681	primiparity;m_bmiincl;m_hbincl;w_age;m_heightincl	FALSE
Unknown_Campylobacter_D	Tri3, mother	Pre+Postnatal	3.29485e-06	-0.000124092	0.000130681	0.604107	0.959275	0.984616	primiparity;m_bmiincl;m_hbincl;ga_days_incl;GWG;w_age;m_heightincl;m_muacincl	FALSE
Prevotella.sp002299635	Tri3, mother	Pre+Postnatal	-0.00571554	-0.0150895	0.00365843	-4	0.22997	0.827735	primiparity;m_bmiincl;m_hbincl;ga_days_incl;GWG;w_age;m_heightincl	FALSE
Bifidobacterium.breve	Tri3, mother	Pre+Postnatal	0			0
Parabacteroides.distasonis	Tri3, mother	Pre+Postnatal	0.000497675	-0.000310169	0.00130552	4	0.22518	0.827735	primiparity;m_bmiincl;m_hbincl;ga_days_incl;GWG;w_age;m_heightincl;m_muacincl	FALSE
Bifidobacterium.bifidum	Tri3, mother	Pre+Postnatal	0			0
Treponema_D.sp900541945	Tri3, mother	Pre+Postnatal	-0.00297908	-0.00846568	0.00250752	-4	0.284776	0.827735	primiparity;m_bmiincl;m_hbincl;ga_days_incl;GWG;w_age;m_heightincl;m_muacincl	FALSE
Acetatifactor.sp900066365	Tri3, mother	Pre+Postnatal	-0.000121847	-0.00302278	0.00277908	-4	0.933913	0.977858	primiparity;m_bmiincl;m_hbincl;ga_days_incl;GWG;w_age;m_heightincl;m_muacincl	FALSE
Klebsiella_B.aerogenes	Tri3, mother	Pre+Postnatal	-0.000202546	-0.000477066	7.19747e-05	-4	0.146859	0.827735	m_hbincl;GWG;m_heightincl;m_muacincl	FALSE
Bifidobacterium.longum	Tri3, mother	Pre+Postnatal	1.95406e-05	-1.22525e-05	5.13337e-05	3.58274	0.226288	0.827735	primiparity;m_hbincl;ga_days_incl;GWG;w_age;m_muacincl	FALSE
Akkermansia.muciniphila	Tri3, mother	Pre+Postnatal	-0.000457546	-0.00242236	0.00150727	-4	0.645833	0.905668	primiparity;m_bmiincl;m_hbincl;ga_days_incl;GWG;w_age;m_heightincl;m_muacincl	FALSE
Campylobacter_D.upsaliensis	Tri3, mother	Pre+Postnatal	0			0
RC9.sp000431015	Tri3, mother	Pre+Postnatal	0.000455434	-0.00136157	0.00227244	4	0.620939	0.896536	m_bmiincl;m_hbincl;GWG;m_muacincl	FALSE
Campylobacter_D.jejuni	Tri3, mother	Pre+Postnatal	-2.36722e-05	-5.83197e-05	1.09752e-05	-4	0.178885	0.827735	m_bmiincl;m_hbincl;ga_days_incl;w_age;m_heightincl;m_muacincl	FALSE
Acinetobacter.baumannii	Tri3, mother	Pre+Postnatal	0			0
Prevotella.sp000436035	Tri3, mother	Pre+Postnatal	-0.000551027	-0.00684223	0.00574018	-4	0.862723	0.951871	primiparity;m_bmiincl;m_hbincl;ga_days_incl;GWG;w_age;m_heightincl;m_muacincl	FALSE
Prevotella.sp900551985	Tri3, mother	Pre+Postnatal	0.00197675	-0.00234086	0.00629435	4	0.366796	0.827735	primiparity;m_bmiincl;m_hbincl;ga_days_incl;GWG;w_age;m_heightincl;m_muacincl	FALSE
Bacteroides.thetaiotaomicron	Tri3, mother	Pre+Postnatal	7.3756e-05	-0.000268222	0.000415734	4	0.670364	0.905668	primiparity;m_bmiincl;m_hbincl;ga_days_incl;GWG;w_age;m_heightincl;m_muacincl	FALSE
Fusobacterium_A.mortiferum	Tri3, mother	Pre+Postnatal	8.70004e-07	-3.34354e-05	3.51754e-05	0.159514	0.960075	0.984616	primiparity;m_hbincl;GWG;w_age;m_muacincl	FALSE
Prevotella.sp000434975	Tri3, mother	Pre+Postnatal	0.00376473	-0.00402897	0.0115584	4	0.341143	0.827735	primiparity;m_bmiincl;m_hbincl;GWG;m_muacincl	FALSE
RC9.sp000433355	Tri3, mother	Pre+Postnatal	-0.00676903	-0.0176395	0.00410141	-4	0.220243	0.827735	primiparity;m_bmiincl;m_hbincl;ga_days_incl;GWG;w_age;m_heightincl;m_muacincl	FALSE
Phocaeicola.sp000434735	Tri3, mother	Pre+Postnatal	4.78074e-05	-0.000397812	0.000493427	4	0.832275	0.944357	primiparity;m_bmiincl;m_hbincl;ga_days_incl;GWG;w_age;m_heightincl;m_muacincl	FALSE
Prevotella.copri	Tri3, mother	Pre+Postnatal	0.000353404	-0.0112153	0.0119221	4	0.951909	0.981564	primiparity;m_bmiincl;m_hbincl;ga_days_incl;GWG;w_age;m_heightincl;m_muacincl	FALSE
CAG.488.sp900554995	Tri3, mother	Pre+Postnatal	-0.00146575	-0.00346489	0.000533399	-4	0.149353	0.827735	primiparity;m_bmiincl;m_hbincl;ga_days_incl;GWG;w_age;m_heightincl;m_muacincl	FALSE
Prevotella.sp000434515	Tri3, mother	Pre+Postnatal	0.0019182	-0.00805538	0.0118918	4	0.704242	0.920451	primiparity;m_bmiincl;m_hbincl;ga_days_incl;GWG;w_age;m_heightincl;m_muacincl	FALSE
Veillonella_A.seminalis	Tri3, mother	Pre+Postnatal	0			0
Prevotella.copri_A	Tri3, mother	Pre+Postnatal	0.00306634	-0.00231664	0.00844932	4	0.26189	0.827735	primiparity;m_bmiincl;m_hbincl;ga_days_incl;GWG;w_age;m_heightincl;m_muacincl	FALSE
Prevotella.sp900551275	Tri3, mother	Pre+Postnatal	0.00268863	-0.00522703	0.0106043	4	0.502855	0.867681	primiparity;m_bmiincl;m_hbincl;ga_days_incl;GWG;w_age;m_heightincl;m_muacincl	FALSE
Mesosutterella.multiformis	Tri3, mother	Pre+Postnatal	-1.02758e-05	-3.59199e-05	1.53684e-05	-1.88405	0.429435	0.840722	primiparity;m_bmiincl;m_hbincl;ga_days_incl;GWG;w_age;m_heightincl;m_muacincl	FALSE
Parabacteroides.merdae	Tri3, mother	Pre+Postnatal	0.000136624	-0.000425592	0.000698839	4	0.631545	0.898183	primiparity;m_bmiincl;m_hbincl;ga_days_incl;GWG;w_age;m_heightincl;m_muacincl	FALSE
Ruthenibacterium.lactatiformans	Tri3, mother	Pre+Postnatal	-0.000106938	-0.000445692	0.000231817	-4	0.533473	0.873699	m_bmiincl;m_hbincl;ga_days_incl;GWG;w_age;m_muacincl	FALSE
Prevotella.sp900313215	Tri3, mother	Pre+Postnatal	-0.0122843	-0.0217877	-0.00278099	-4	0.0116873	0.827735	primiparity;m_bmiincl;m_hbincl;ga_days_incl;GWG;w_age;m_heightincl;m_muacincl	TRUE
Clostridium.neonatale	Tri3, mother	Pre+Postnatal	0			0
Ruminococcus_B.gnavus	Tri3, mother	Pre+Postnatal	-9.18034e-05	-0.00023465	5.10432e-05	-4	0.205926	0.827735	primiparity;m_hbincl;ga_days_incl;w_age;m_heightincl	FALSE
Unknown_Veillonella	Tri3, mother	Pre+Postnatal	-0.000151415	-0.000329889	2.70597e-05	-4	0.0957107	0.827735	m_hbincl;ga_days_incl	FALSE
C941.sp004557565	Tri3, mother	Pre+Postnatal	0.000293669	-0.00642073	0.00700806	4	0.931191	0.977858	primiparity;m_bmiincl;m_hbincl;ga_days_incl;GWG;w_age;m_heightincl;m_muacincl	FALSE
Prevotella.sp002251295	Tri3, mother	Pre+Postnatal	0.00337612	-0.00353389	0.0102861	4	0.335676	0.827735	primiparity;m_hbincl;GWG;w_age	FALSE
Prevotella.stercorea	Tri3, mother	Pre+Postnatal	-0.00330693	-0.00777953	0.00116568	-4	0.146006	0.827735	primiparity;m_hbincl;GWG;w_age;m_muacincl	FALSE
Megasphaera.sp900540735	Tri3, mother	Pre+Postnatal	0			0
Prevotella.sp900546535	Tri3, mother	Pre+Postnatal	0.00420657	-0.00137006	0.00978321	4	0.138063	0.827735	primiparity;m_bmiincl;m_hbincl;ga_days_incl;GWG;w_age;m_heightincl;m_muacincl	FALSE
Succinivibrio.sp000431835	Tri3, mother	Pre+Postnatal	-0.00485662	-0.011059	0.00134575	-4	0.12383	0.827735	primiparity;m_hbincl;ga_days_incl;GWG;m_heightincl	FALSE
Escherichia.sp000208585	Tri3, mother	Pre+Postnatal	0			0
Prevotellamassilia.sp900540885	Tri3, mother	Pre+Postnatal	0.00293173	-0.00424558	0.010109	4	0.420588	0.840722	primiparity;m_bmiincl;m_hbincl;ga_days_incl;GWG;w_age;m_heightincl	FALSE
Unknown_UBA4334	Tri3, mother	Pre+Postnatal	0.00189866	0.000242348	0.00355497	4	0.0249734	0.827735	m_bmiincl;m_hbincl;ga_days_incl;m_heightincl;m_muacincl	TRUE
Prevotella.sp900546575	Tri3, mother	Pre+Postnatal	0.000271934	-0.000437303	0.00098117	4	0.449563	0.850856	primiparity;m_bmiincl;m_hbincl;ga_days_incl;GWG;w_age;m_heightincl;m_muacincl	FALSE
Treponema_D.sp900541995	Tri3, mother	Pre+Postnatal	0.00262259	-0.00383877	0.00908395	4	0.423626	0.840722	m_hbincl;w_age	FALSE
Sutterella.wadsworthensis	Tri3, mother	Pre+Postnatal	-1.8779e-05	-0.000140768	0.00010321	-3.44311	0.761231	0.927318	primiparity;m_bmiincl;m_hbincl;ga_days_incl;GWG;w_age;m_heightincl;m_muacincl	FALSE
Unknown_RC9	Tri3, mother	Pre+Postnatal	0.00126485	-0.00525196	0.00778166	4	0.701707	0.918951	m_hbincl;ga_days_incl;w_age;m_heightincl;m_muacincl	FALSE
Phocaeicola.plebeius_A	Tri3, mother	Pre+Postnatal	5.6055e-05	-0.00012073	0.00023284	4	0.53168	0.873699	m_bmiincl;ga_days_incl;GWG;w_age;m_muacincl	FALSE
RC9.sp900544195	Tri3, mother	Pre+Postnatal	0.00102205	-0.00574054	0.00778463	4	0.765481	0.927318	primiparity;m_bmiincl;m_hbincl;GWG;m_heightincl;m_muacincl	FALSE
Bacteroides.ovatus	Tri3, mother	Pre+Postnatal	-4.52658e-05	-0.000421777	0.000331245	-4	0.812403	0.939666	primiparity;m_bmiincl;m_hbincl;ga_days_incl;GWG;w_age;m_heightincl;m_muacincl	FALSE
Citrobacter_A.sedlakii	Tri3, mother	Pre+Postnatal	0			0
Prevotellamassilia.timonensis	Tri3, mother	Pre+Postnatal	-0.00332722	-0.0106509	0.00399647	-4	0.370527	0.827735	primiparity;m_bmiincl;m_hbincl;GWG;w_age;m_muacincl	FALSE
Helicobacter_C.cinaedi	Tri3, mother	Pre+Postnatal	0			0
Enterocloster.sp900541315	Tri3, mother	Pre+Postnatal	8.35142e-06	-5.78255e-06	2.24854e-05	1.53122	0.244636	0.827735	primiparity;m_bmiincl;ga_days_incl;GWG;w_age;m_muacincl	FALSE
Prevotella.sp900556795	Tri3, mother	Pre+Postnatal	0.00927029	0.00195112	0.0165894	4	0.0134382	0.827735	primiparity;m_hbincl;ga_days_incl;GWG;w_age;m_heightincl	TRUE
Prevotella.sp002300055	Tri3, mother	Pre+Postnatal	-0.00212676	-0.00588861	0.00163509	-4	0.265549	0.827735	m_bmiincl;w_age;m_heightincl;m_muacincl	FALSE
Mediterraneibacter.sp900555215	Tri3, mother	Pre+Postnatal	0			0
Enterobacter.cloacae	Tri3, mother	Pre+Postnatal	-0.000254366	-0.00066338	0.000154648	-4	0.220863	0.827735	m_bmiincl;m_hbincl;ga_days_incl;GWG;w_age;m_muacincl	FALSE
Helicobacter_B.fennelliae	Tri3, mother	Pre+Postnatal	0			0
Hungatella.sp005845265	Tri3, mother	Pre+Postnatal	-0.00171699	-0.00533573	0.00190174	-4	0.349715	0.827735	m_bmiincl;m_hbincl;ga_days_incl;GWG;w_age;m_heightincl;m_muacincl	FALSE
CAG.45.sp900066395	Tri3, mother	Pre+Postnatal	0.000386603	-0.000944187	0.00171739	4	0.566526	0.884528	primiparity;m_bmiincl;m_hbincl;ga_days_incl;GWG;w_age;m_heightincl;m_muacincl	FALSE
Megasphaera.sp000417505	Tri3, mother	Pre+Postnatal	5.12548e-05	-0.000122249	0.000224758	4	0.560021	0.880603	primiparity;m_bmiincl;m_hbincl;ga_days_incl;GWG;w_age;m_muacincl	FALSE
RC9.sp000432515	Tri3, mother	Pre+Postnatal	0.000676951	-0.0032519	0.00460581	4	0.733826	0.92714	primiparity;m_hbincl;GWG;w_age;m_heightincl	FALSE
Ruminococcus_E.sp003526955	Tri3, mother	Pre+Postnatal	-0.00262621	-0.00629021	0.00103778	-4	0.158662	0.827735	primiparity;m_hbincl;ga_days_incl	FALSE
Veillonella.parvula_A	Tri3, mother	Pre+Postnatal	-2.49546e-05	-0.000157852	0.000107943	-4	0.710924	0.92714	primiparity;m_bmiincl;m_hbincl;ga_days_incl;GWG;w_age;m_heightincl;m_muacincl	FALSE
Prevotella.sp002265625	Tri3, mother	Pre+Postnatal	-0.000829274	-0.00566439	0.00400584	-4	0.734963	0.92714	primiparity;m_bmiincl;m_hbincl;ga_days_incl;GWG;w_age;m_heightincl;m_muacincl	FALSE
Duodenibacillus.massiliensis	Tri3, mother	Pre+Postnatal	-0.000327195	-0.00102243	0.00036804	-4	0.353644	0.827735	primiparity;m_hbincl;ga_days_incl;GWG;w_age;m_heightincl	FALSE
CAG.279.sp000437795	Tri3, mother	Pre+Postnatal	0.00229827	-0.00217843	0.00677498	4	0.311733	0.827735	primiparity;m_bmiincl;m_hbincl;ga_days_incl;GWG;w_age;m_heightincl;m_muacincl	FALSE
Parabacteroides.sp900155425	Tri3, mother	Pre+Postnatal	0.000110633	-0.000536196	0.000757462	4	0.735664	0.92714	primiparity;m_bmiincl;m_hbincl;ga_days_incl;GWG;w_age;m_heightincl;m_muacincl	FALSE
Prevotella.sp900543975	Tri3, mother	Pre+Postnatal	-0.000838971	-0.00306047	0.00138253	-4	0.456467	0.850967	primiparity;m_hbincl;w_age;m_muacincl	FALSE
Streptococcus.lutetiensis	Tri3, mother	Pre+Postnatal	-5.97062e-05	-0.000171707	5.22942e-05	-4	0.293689	0.827735	m_bmiincl;GWG;m_muacincl	FALSE
Bilophila.wadsworthia	Tri3, mother	Pre+Postnatal	8.94917e-05	-0.000398959	0.000577943	4	0.717634	0.92714	primiparity;m_bmiincl;m_hbincl;ga_days_incl;GWG;w_age;m_heightincl;m_muacincl	FALSE
RC9.sp000432655	Tri3, mother	Pre+Postnatal	0.000296523	-0.00178728	0.00238033	4	0.778828	0.92898	primiparity;m_bmiincl;ga_days_incl;GWG;m_muacincl	FALSE
Prevotella.sp000436915	Tri3, mother	Pre+Postnatal	0.000687468	-0.00418152	0.00555645	4	0.78049	0.929263	primiparity;m_bmiincl;ga_days_incl;GWG;w_age;m_muacincl	FALSE
Lactobacillus.crispatus	Tri3, mother	Pre+Postnatal	0			0
Klebsiella.quasipneumoniae	Tri3, mother	Pre+Postnatal	-0.000434791	-0.00130563	0.000436043	-4	0.325162	0.827735	primiparity;m_bmiincl;m_hbincl;ga_days_incl;GWG;w_age;m_heightincl;m_muacincl	FALSE
SFDB01.sp004558825	Tri3, mother	Pre+Postnatal	0.000136617	-0.00150803	0.00178126	4	0.869748	0.953744	primiparity;m_bmiincl;m_hbincl;ga_days_incl;GWG;w_age;m_muacincl	FALSE
Unknown_Agathobacter	Tri3, mother	Pre+Postnatal	0.00140112	-0.00209545	0.00489769	4	0.429447	0.840722	primiparity;m_bmiincl;m_hbincl;GWG;w_age;m_heightincl;m_muacincl	FALSE
Prevotellamassilia.sp900546605	Tri3, mother	Pre+Postnatal	0.00142149	-0.00153738	0.00438036	4	0.34377	0.827735	primiparity;m_bmiincl;m_hbincl;GWG;w_age	FALSE
Unknown_Faecalibacterium	Tri3, mother	Pre+Postnatal	-0.0007796	-0.00543745	0.00387825	-4	0.741135	0.927318	primiparity;m_bmiincl;m_hbincl;ga_days_incl;GWG;m_heightincl;m_muacincl	FALSE
Prevotellamassilia.sp900539625	Tri3, mother	Pre+Postnatal	0.000470486	-0.00172687	0.00266784	4	0.672607	0.905668	primiparity;m_bmiincl;m_hbincl;ga_days_incl;GWG;w_age;m_heightincl;m_muacincl	FALSE
Citrobacter.werkmanii	Tri3, mother	Pre+Postnatal	-9.65902e-06	-2.46217e-05	5.30368e-06	-1.77097	0.203907	0.827735	primiparity;m_hbincl;ga_days_incl;GWG;w_age;m_heightincl	FALSE
RUG572.sp900547945	Tri3, mother	Pre+Postnatal	-0.000461668	-0.00424202	0.00331869	-4	0.809498	0.939666	primiparity;m_bmiincl;m_hbincl;ga_days_incl;GWG;w_age;m_heightincl;m_muacincl	FALSE
CAG.180.sp000432435	Tri3, mother	Pre+Postnatal	-0.00126134	-0.0046571	0.00213441	-4	0.463812	0.857816	primiparity;m_bmiincl;m_hbincl;ga_days_incl;GWG;w_age;m_heightincl;m_muacincl	FALSE
Enterobacter.roggenkampii	Tri3, mother	Pre+Postnatal	-0.000912842	-0.00369486	0.00186918	-4	0.517489	0.867993	m_bmiincl;m_hbincl;ga_days_incl;w_age;m_heightincl;m_muacincl	FALSE
Dialister.sp900543455	Tri3, mother	Pre+Postnatal	0.000670638	-0.0022468	0.00358807	4	0.650082	0.905668	primiparity;m_bmiincl;m_hbincl;ga_days_incl;GWG;w_age;m_heightincl;m_muacincl	FALSE
Escherichia.fergusonii	Tri3, mother	Pre+Postnatal	0			0
CAG.873.sp001701165	Tri3, mother	Pre+Postnatal	0.00181745	-0.00102972	0.00466462	4	0.208997	0.827735	primiparity;m_bmiincl;GWG;w_age	FALSE
Campylobacter_D.sp900539255	Tri3, mother	Pre+Postnatal	0.000599965	-0.000925618	0.00212555	4	0.438026	0.845403	primiparity;m_bmiincl;m_hbincl;ga_days_incl;GWG;w_age;m_heightincl;m_muacincl	FALSE
UBA4248.sp004554395	Tri3, mother	Pre+Postnatal	-0.000540405	-0.00150123	0.00042042	-4	0.267955	0.827735	primiparity;m_bmiincl;m_hbincl;GWG;w_age;m_heightincl;m_muacincl	FALSE
Unknown_Lachnospiraceae	Tri3, mother	Pre+Postnatal	0.00122232	0.000208982	0.00223567	4	0.0184265	0.827735		TRUE
Unknown_CAG.274	Tri3, mother	Pre+Postnatal	0			0
Unknown_W0P29.029	Tri3, mother	Pre+Postnatal	2.85288e-06	-1.81439e-06	7.52015e-06	0.523072	0.228856	0.827735	primiparity;ga_days_incl;GWG;w_age	FALSE
Megasphaera.sp900539295	Tri3, mother	Pre+Postnatal	0			0
Alistipes.obesi	Tri3, mother	Pre+Postnatal	0.00052601	-0.00116517	0.00221719	4	0.539528	0.877561	m_hbincl;ga_days_incl;w_age;m_heightincl;m_muacincl	FALSE
Prevotellamassilia.sp900543155	Tri3, mother	Pre+Postnatal	0.0019395	-0.00254375	0.00642274	4	0.393731	0.835014	primiparity;m_bmiincl;m_hbincl;ga_days_incl;GWG;m_heightincl;m_muacincl	FALSE
Unknown_C941	Tri3, mother	Pre+Postnatal	0.000232767	-5.59995e-05	0.000521534	4	0.113237	0.827735	m_bmiincl;m_hbincl;ga_days_incl;GWG;w_age;m_muacincl	FALSE
Bacteroides.xylanisolvens	Tri3, mother	Pre+Postnatal	0.00015434	-4.90342e-05	0.000357713	4	0.135708	0.827735	primiparity;m_bmiincl;m_hbincl;ga_days_incl;GWG;w_age;m_heightincl;m_muacincl	FALSE
Bacteroides.uniformis	Tri3, mother	Pre+Postnatal	0.00126386	-0.0014059	0.00393361	4	0.350862	0.827735	m_bmiincl;w_age;m_heightincl;m_muacincl	FALSE
Acetatifactor.sp003447295	Tri3, mother	Pre+Postnatal	0.000598106	-0.000895585	0.0020918	4	0.42976	0.840722	primiparity;m_bmiincl;m_hbincl;ga_days_incl;GWG;w_age;m_heightincl;m_muacincl	FALSE
Clostridium_Q.symbiosum	Tri3, mother	Pre+Postnatal	0			0
COE1.sp001916965	Tri3, mother	Pre+Postnatal	9.86832e-05	-0.000801878	0.000999244	4	0.82874	0.944278	primiparity;m_bmiincl;m_hbincl;ga_days_incl;GWG;w_age;m_heightincl;m_muacincl	FALSE
Collinsella.sp900556495	Tri3, mother	Pre+Postnatal	0			0
UBA4372.sp900543815	Tri3, mother	Pre+Postnatal	0.00119514	-0.00102204	0.00341232	4	0.288287	0.827735	primiparity;m_bmiincl;m_hbincl;ga_days_incl;w_age;m_heightincl;m_muacincl	FALSE
Prevotellamassilia.sp900541575	Tri3, mother	Pre+Postnatal	-0.000688455	-0.00335838	0.00198147	-4	0.610878	0.895683	primiparity;m_bmiincl;m_hbincl;ga_days_incl;GWG;w_age;m_heightincl;m_muacincl	FALSE
CAG.488.sp000434915	Tri3, mother	Pre+Postnatal	0.00247342	5.25334e-05	0.00489431	4	0.0452963	0.827735	GWG;m_muacincl	TRUE
Lactobacillus.paragasseri	Tri3, mother	Pre+Postnatal	0			0
CAG.488.sp000434055	Tri3, mother	Pre+Postnatal	0.000919279	1.30791e-06	0.00183725	4	0.0496789	0.827735	primiparity;w_age	TRUE
Unknown_CAG.180	Tri3, mother	Pre+Postnatal	0.00166626	-0.000811915	0.00414444	4	0.185856	0.827735	m_bmiincl;m_hbincl;ga_days_incl;w_age;m_muacincl	FALSE
Gemmiger.formicilis	Tri3, mother	Pre+Postnatal	4.38932e-05	-0.00054678	0.000634567	4	0.883368	0.958964	primiparity;m_bmiincl;m_hbincl;ga_days_incl;GWG;w_age;m_heightincl;m_muacincl	FALSE
CAG.95.sp000438155	Tri3, mother	Pre+Postnatal	0.000184175	-0.000620224	0.000988575	4	0.651394	0.905668	primiparity;m_bmiincl;ga_days_incl;GWG;w_age;m_heightincl;m_muacincl	FALSE
Faecalibacterium.prausnitzii_E	Tri3, mother	Pre+Postnatal	-0.000535222	-0.00259823	0.00152779	-4	0.608764	0.895653	m_bmiincl;ga_days_incl;GWG;w_age	FALSE
Collinsella.aerofaciens_H	Tri3, mother	Pre+Postnatal	0			0
ER4.sp900317525	Tri3, mother	Pre+Postnatal	0.000650394	-0.00365675	0.00495754	4	0.765651	0.927318	primiparity;m_bmiincl;m_hbincl;ga_days_incl;GWG;w_age;m_heightincl;m_muacincl	FALSE
Unknown_Acetatifactor	Tri3, mother	Pre+Postnatal	0.00121644	-0.00177664	0.00420952	4	0.422922	0.840722	primiparity;m_bmiincl;m_hbincl;ga_days_incl;GWG;w_age;m_muacincl	FALSE
Unknown_CAG.95	Tri3, mother	Pre+Postnatal	0.000358361	-0.000122131	0.000838853	4	0.142567	0.827735	m_hbincl;GWG;w_age	FALSE
Citrobacter_B.koseri	Tri3, mother	Pre+Postnatal	1.61282e-05	-1.15496e-05	4.3806e-05	2.95709	0.251216	0.827735	primiparity;m_bmiincl;m_hbincl;w_age	FALSE
Morganella.morganii	Tri3, mother	Pre+Postnatal	0			0
Streptococcus.pasteurianus	Tri3, mother	Pre+Postnatal	0.000127837	-2.97185e-05	0.000285392	4	0.110938	0.827735	primiparity	FALSE
Bacteroides.caccae	Tri3, mother	Pre+Postnatal	6.74685e-05	-0.00110074	0.00123568	4	0.909224	0.973621	primiparity;m_bmiincl;m_hbincl;ga_days_incl;GWG;w_age;m_heightincl;m_muacincl	FALSE
Prevotella.sp900544495	Tri3, mother	Pre+Postnatal	-1.04337e-05	-0.000275585	0.000254718	-1.913	0.938078	0.97883	primiparity;m_bmiincl;m_hbincl;ga_days_incl;GWG;w_age;m_heightincl;m_muacincl	FALSE
ER4.sp000765235	Tri3, mother	Pre+Postnatal	1.87473e-07	-0.00274576	0.00274613	0.0343729	0.999892	0.999892	primiparity;m_bmiincl;m_hbincl;ga_days_incl;GWG;w_age;m_heightincl;m_muacincl	FALSE
Lactobacillus.gasseri	Tri3, mother	Pre+Postnatal	0			0
UBA7173.sp900545955	Tri3, mother	Pre+Postnatal	0.000719044	-0.0010961	0.00253419	4	0.434804	0.844106	primiparity;w_age;m_muacincl	FALSE
Ruminococcus_E.sp900543095	Tri3, mother	Pre+Postnatal	0			0
Clostridium.butyricum	Tri3, mother	Pre+Postnatal	0			0
RC9.sp900541925	Tri3, mother	Pre+Postnatal	0.0016787	-0.000252737	0.00361014	4	0.0879324	0.827735	primiparity;m_bmiincl;w_age;m_muacincl	FALSE
Treponema_D.succinifaciens	Tri3, mother	Pre+Postnatal	-0.000762902	-0.00393917	0.00241336	-4	0.635541	0.899789	m_bmiincl;m_hbincl;ga_days_incl;GWG;m_heightincl;m_muacincl	FALSE
CAG.83.sp900556015	Tri3, mother	Pre+Postnatal	0.00147174	-0.000867709	0.00381119	4	0.215597	0.827735	m_bmiincl;m_hbincl;ga_days_incl;GWG;w_age;m_muacincl	FALSE
Ruminococcus_E.bromii_B	Tri3, mother	Pre+Postnatal	0.00119025	-0.00105615	0.00343665	4	0.296623	0.827735	GWG;w_age;m_heightincl	FALSE
Agathobacter.sp900548765	Tri3, mother	Pre+Postnatal	0.000154611	-0.00055962	0.000868842	4	0.669218	0.905668	primiparity;m_bmiincl;m_hbincl;ga_days_incl;GWG;w_age;m_heightincl;m_muacincl	FALSE
Zag111.sp002103105	Tri3, mother	Pre+Postnatal	-0.000519242	-0.00263906	0.00160057	-4	0.628866	0.898183	primiparity;m_bmiincl;m_hbincl;w_age;m_heightincl;m_muacincl	FALSE
CAG.873.sp900540625	Tri3, mother	Pre+Postnatal	-0.000161506	-0.000635431	0.000312418	-4	0.501465	0.867681	primiparity;m_bmiincl;m_hbincl;ga_days_incl;GWG;m_heightincl;m_muacincl	FALSE
CAG.95.sp900553305	Tri3, mother	Pre+Postnatal	0.000379102	-0.000454158	0.00121236	4	0.369881	0.827735	primiparity;m_bmiincl;GWG;m_muacincl	FALSE
Unknown_Prevotellamassilia	Tri3, mother	Pre+Postnatal	-0.000652908	-0.00322972	0.00192391	-4	0.617097	0.896536	primiparity;m_bmiincl;ga_days_incl;GWG;w_age;m_heightincl;m_muacincl	FALSE
Eubacterium_R.sp000433975	Tri3, mother	Pre+Postnatal	-0.000180976	-0.00233001	0.00196806	-4	0.867962	0.953573	primiparity;m_bmiincl;m_hbincl;ga_days_incl;GWG;w_age;m_heightincl;m_muacincl	FALSE
Prevotella.sp003447235	Tri3, mother	Pre+Postnatal	-0.00137033	-0.00440501	0.00166435	-4	0.373404	0.828118	primiparity;m_bmiincl;m_hbincl;GWG;w_age;m_heightincl;m_muacincl	FALSE
Salmonella.enterica	Tri3, mother	Pre+Postnatal	0.000423211	-0.000191798	0.00103822	4	0.175829	0.827735	primiparity;m_hbincl;GWG;w_age	FALSE
Comamonas.kerstersii	Tri3, mother	Pre+Postnatal	0.000302497	-0.000709448	0.00131444	4	0.555404	0.880603	primiparity;m_bmiincl;GWG;w_age;m_muacincl	FALSE
Unknown_RUG410	Tri3, mother	Pre+Postnatal	-0.000429621	-0.00172949	0.000870252	-4	0.514431	0.867993	primiparity;m_bmiincl;m_hbincl;ga_days_incl;GWG;m_heightincl;m_muacincl	FALSE
Prevotella.sp900553155	Tri3, mother	Pre+Postnatal	0.000156708	-0.000553355	0.000866771	4	0.663161	0.905668	primiparity;m_bmiincl;m_hbincl;ga_days_incl;GWG;w_age;m_heightincl;m_muacincl	FALSE
Faecalibacterium.prausnitzii_F	Tri3, mother	Pre+Postnatal	-0.00200948	-0.00398382	-3.51388e-05	-4	0.0461152	0.827735	primiparity;m_bmiincl;m_hbincl;ga_days_incl;w_age;m_heightincl;m_muacincl	TRUE
Unknown_Lancefieldella	Tri3, mother	Pre+Postnatal	0			0
Bacteroides.cellulosilyticus	Tri3, mother	Pre+Postnatal	0			0
CAG.83.sp003487665	Tri3, mother	Pre+Postnatal	0.000251596	-0.00117233	0.00167552	4	0.727288	0.92714	primiparity;m_hbincl;ga_days_incl;GWG;w_age;m_heightincl;m_muacincl	FALSE
CAG.83.sp900313295	Tri3, mother	Pre+Postnatal	0.00113895	-0.000403292	0.00268118	4	0.146505	0.827735	w_age;m_muacincl	FALSE
Unknown_Ruminococcus_E	Tri3, mother	Pre+Postnatal	-7.46778e-05	-0.00103789	0.000888535	-4	0.87836	0.955409	primiparity;m_hbincl;ga_days_incl;GWG;w_age;m_heightincl;m_muacincl	FALSE
Prevotella.sp900552515	Tri3, mother	Pre+Postnatal	-0.000262482	-0.00151815	0.000993185	-4	0.679945	0.909069	primiparity;m_bmiincl;ga_days_incl;GWG;w_age;m_heightincl;m_muacincl	FALSE
CAG.177.sp003514385	Tri3, mother	Pre+Postnatal	0.000320144	-0.000940871	0.00158116	4	0.616438	0.896536	primiparity;m_bmiincl;ga_days_incl;w_age;m_muacincl	FALSE
Prevotella.sp900548745	Tri3, mother	Pre+Postnatal	0.00083183	-0.00171633	0.00337999	4	0.519631	0.867993	m_bmiincl;m_hbincl;ga_days_incl;GWG;w_age;m_muacincl	FALSE
Unknown_CAG.110	Tri3, mother	Pre+Postnatal	0.0012479	-0.000598915	0.00309471	4	0.183676	0.827735	primiparity;m_hbincl;ga_days_incl;GWG;w_age;m_heightincl;m_muacincl	FALSE
Proteus.mirabilis	Tri3, mother	Pre+Postnatal	0			0
Faecalibacterium.prausnitzii_H	Tri3, mother	Pre+Postnatal	0.000585188	-0.000489852	0.00166023	4	0.283659	0.827735	primiparity;GWG;w_age	FALSE
CAG.83.sp000435555	Tri3, mother	Pre+Postnatal	0.000257649	-0.00205112	0.00256642	4	0.825639	0.944278	primiparity;m_bmiincl;m_hbincl;ga_days_incl;GWG;w_age;m_heightincl;m_muacincl	FALSE
Unknown_Rothia	Tri3, mother	Pre+Postnatal	0			0
Dialister.sp900541605	Tri3, mother	Pre+Postnatal	0			0
Zag111.sp003258735	Tri3, mother	Pre+Postnatal	-0.000365776	-0.00195563	0.00122408	-4	0.64982	0.905668	primiparity;m_bmiincl;m_hbincl;ga_days_incl;GWG;w_age;m_muacincl	FALSE
CAG.710.sp000432595	Tri3, mother	Pre+Postnatal	-0.000103715	-0.000371216	0.000163786	-4	0.444527	0.847864	primiparity;m_bmiincl;ga_days_incl;GWG;w_age;m_heightincl;m_muacincl	FALSE
CAG.95.sp000436115	Tri3, mother	Pre+Postnatal	7.23469e-05	-0.00113547	0.00128017	4	0.905868	0.971936	primiparity;m_bmiincl;m_hbincl;ga_days_incl;GWG;w_age;m_heightincl;m_muacincl	FALSE
Faecalibacterium.prausnitzii_G	Tri3, mother	Pre+Postnatal	-0.00249856	-0.00489441	-0.00010272	-4	0.0410789	0.827735	primiparity;m_bmiincl;ga_days_incl;w_age;m_heightincl;m_muacincl	TRUE
Ruminiclostridium_E.sp900556525	Tri3, mother	Pre+Postnatal	0.000308318	-0.000247878	0.000864515	4	0.274933	0.827735	primiparity;m_bmiincl;w_age;m_muacincl	FALSE
Agathobacter.rectalis	Tri3, mother	Pre+Postnatal	6.43963e-05	-0.00183147	0.00196026	4	0.946535	0.980077	primiparity;m_bmiincl;m_hbincl;ga_days_incl;GWG;w_age;m_heightincl;m_muacincl	FALSE
Ruminococcus_E.sp003438075	Tri3, mother	Pre+Postnatal	0.000347	-0.00193988	0.00263388	4	0.764586	0.927318	primiparity;m_bmiincl;m_hbincl;m_heightincl;m_muacincl	FALSE
Cetobacterium_A.somerae	Tri3, mother	Pre+Postnatal	4.23476e-05	-7.57272e-05	0.000160422	4	0.479341	0.857816	primiparity;m_bmiincl;ga_days_incl;GWG;w_age;m_heightincl;m_muacincl	FALSE
Streptococcus.vestibularis	Tri3, mother	Pre+Postnatal	-4.26133e-05	-0.000116619	3.13924e-05	-4	0.25683	0.827735	m_bmiincl;m_hbincl;GWG;m_heightincl;m_muacincl	FALSE
Mesosutterella.massiliensis	Tri3, mother	Pre+Postnatal	0			0
ER4.sp900546295	Tri3, mother	Pre+Postnatal	-0.000911614	-0.00225222	0.000428993	-4	0.180959	0.827735	m_hbincl;ga_days_incl;GWG;m_heightincl	FALSE
Parasutterella.excrementihominis	Tri3, mother	Pre+Postnatal	1.31733e-05	-2.95101e-05	5.58568e-05	2.41532	0.542601	0.878201	primiparity;m_bmiincl;m_hbincl;ga_days_incl;GWG;w_age;m_heightincl;m_muacincl	FALSE
Prevotella.sp900552965	Tri3, mother	Pre+Postnatal	-0.000408257	-0.00180043	0.000983912	-4	0.562868	0.882982	primiparity;m_bmiincl;m_hbincl;ga_days_incl;GWG;w_age;m_heightincl;m_muacincl	FALSE
Akkermansia.muciniphila_B	Tri3, mother	Pre+Postnatal	-6.87977e-05	-0.000214492	7.68963e-05	-4	0.352013	0.827735	m_bmiincl;m_hbincl;ga_days_incl;GWG;w_age;m_heightincl;m_muacincl	FALSE
Dialister.sp900543165	Tri3, mother	Pre+Postnatal	0.000304225	-0.00110799	0.00171644	4	0.670724	0.905668	primiparity;m_bmiincl;m_hbincl;ga_days_incl;GWG;w_age;m_heightincl;m_muacincl	FALSE
Erysipelatoclostridium.ramosum	Tri3, mother	Pre+Postnatal	-1.76325e-05	-3.85233e-05	3.25842e-06	-3.23289	0.0974	0.827735	m_bmiincl;m_hbincl;m_heightincl;m_muacincl	FALSE
Dialister.succinatiphilus	Tri3, mother	Pre+Postnatal	0.000173075	-0.000410295	0.000756445	4	0.558374	0.880603	primiparity;m_hbincl;ga_days_incl;GWG;w_age	FALSE
CAG.302.sp001916775	Tri3, mother	Pre+Postnatal	0.000142626	-0.000188667	0.00047392	4	0.39602	0.835014	primiparity;m_bmiincl;m_hbincl;GWG;w_age;m_heightincl;m_muacincl	FALSE
UBA1724.sp900548225	Tri3, mother	Pre+Postnatal	6.29668e-05	-0.000339251	0.000465184	4	0.757338	0.927318	primiparity;m_bmiincl;ga_days_incl;GWG;w_age;m_muacincl	FALSE
Limosilactobacillus.gastricus	Tri3, mother	Pre+Postnatal	0			0
Unknown_CAG.170	Tri3, mother	Pre+Postnatal	-0.000189896	-0.00275131	0.00237152	-4	0.883638	0.958964	primiparity;m_bmiincl;m_hbincl;ga_days_incl;GWG;w_age;m_heightincl;m_muacincl	FALSE
CAG.170.sp002404795	Tri3, mother	Pre+Postnatal	-0.00127574	-0.00302045	0.000468967	-4	0.150446	0.827735	primiparity;m_bmiincl;m_hbincl;ga_days_incl;GWG;w_age;m_heightincl;m_muacincl	FALSE
WG.1.sp900539665	Tri3, mother	Pre+Postnatal	0.000737753	-0.000468264	0.00194377	4	0.228436	0.827735	primiparity;m_bmiincl;m_hbincl;ga_days_incl;GWG;w_age;m_heightincl;m_muacincl	FALSE
Unknown_Bacteroides	Tri3, mother	Pre+Postnatal	0.000480288	-0.000845926	0.0018065	4	0.475071	0.857816	primiparity;m_bmiincl;m_hbincl;ga_days_incl;GWG;m_heightincl;m_muacincl	FALSE
Olsenella_B.sp000752675	Tri3, mother	Pre+Postnatal	0			0
Bifidobacterium.kashiwanohense_A	Tri3, mother	Pre+Postnatal	0			0
Zag111.sp004558955	Tri3, mother	Pre+Postnatal	0.000444644	-0.000111641	0.00100093	4	0.116252	0.827735	primiparity;m_bmiincl;m_hbincl;ga_days_incl;GWG;w_age;m_heightincl;m_muacincl	FALSE
Roseburia.sp900552665	Tri3, mother	Pre+Postnatal	-0.000960041	-0.00262818	0.000708095	-4	0.257054	0.827735	primiparity;m_hbincl;ga_days_incl;GWG;w_age;m_muacincl	FALSE
CAG.484.sp900321895	Tri3, mother	Pre+Postnatal	-0.000187667	-0.000865472	0.000490138	-4	0.584871	0.889815	primiparity;m_bmiincl;m_hbincl;ga_days_incl;w_age;m_heightincl;m_muacincl	FALSE
Agathobacter.faecis	Tri3, mother	Pre+Postnatal	-0.00013595	-0.000919806	0.000647906	-4	0.7321	0.92714	primiparity;m_bmiincl;m_hbincl;ga_days_incl;GWG;w_age;m_heightincl;m_muacincl	FALSE
Agathobacter.sp900543445	Tri3, mother	Pre+Postnatal	-0.000299799	-0.000909292	0.000309694	-4	0.332435	0.827735	primiparity;m_bmiincl;GWG;w_age	FALSE
Ligilactobacillus.ruminis	Tri3, mother	Pre+Postnatal	0			0
Rs.D84.sp900546225	Tri3, mother	Pre+Postnatal	-0.000131362	-0.000420383	0.000157659	-4	0.370299	0.827735	primiparity;m_bmiincl;ga_days_incl;GWG;w_age;m_heightincl;m_muacincl	FALSE
Haemophilus_A.parahaemolyticus	Tri3, mother	Pre+Postnatal	0			0
Eubacterium_R.sp900542875	Tri3, mother	Pre+Postnatal	0.000995782	5.94186e-05	0.00193215	4	0.0373049	0.827735	primiparity;m_bmiincl;GWG;w_age;m_heightincl;m_muacincl	TRUE
Megasphaera.massiliensis	Tri3, mother	Pre+Postnatal	0			0
Gemmiger.variabilis_A	Tri3, mother	Pre+Postnatal	-0.000245533	-0.00177868	0.00128761	-4	0.751915	0.927318	primiparity;m_bmiincl;m_hbincl;ga_days_incl;GWG;w_age;m_heightincl;m_muacincl	FALSE
Muribaculum.sp002492595	Tri3, mother	Pre+Postnatal	-9.71555e-05	-0.000237545	4.32342e-05	-4	0.173429	0.827735	primiparity;w_age	FALSE
Unknown_UBA2883	Tri3, mother	Pre+Postnatal	-0.00079795	-0.00167459	7.86915e-05	-4	0.0740649	0.827735	primiparity;m_bmiincl;m_hbincl;ga_days_incl;w_age;m_heightincl;m_muacincl	FALSE
Phil1.sp004558525	Tri3, mother	Pre+Postnatal	0.000200383	-0.000242594	0.00064336	4	0.372602	0.827735	primiparity;m_bmiincl;ga_days_incl;w_age;m_muacincl	FALSE
Unknown_ER4	Tri3, mother	Pre+Postnatal	0.000371826	-0.000950212	0.00169386	4	0.578936	0.888676	primiparity;m_bmiincl;m_hbincl;ga_days_incl;GWG;w_age;m_heightincl;m_muacincl	FALSE
Prevotella.sp900556395	Tri3, mother	Pre+Postnatal	-0.00014234	-0.000383278	9.85993e-05	-4	0.244736	0.827735	primiparity;m_bmiincl;w_age;m_heightincl;m_muacincl	FALSE
Eubacterium.callanderi	Tri3, mother	Pre+Postnatal	0			0
Megasphaera_B.sp003467125	Tri3, mother	Pre+Postnatal	4.44769e-05	-7.56505e-07	8.97103e-05	4	0.0539011	0.827735	m_bmiincl;m_hbincl;w_age;m_muacincl	FALSE
CAG.83.sp900554275	Tri3, mother	Pre+Postnatal	0.000237701	-0.000680404	0.00115581	4	0.609465	0.895653	primiparity;m_bmiincl;m_hbincl;GWG;m_heightincl;m_muacincl	FALSE
Prevotella.sp002251385	Tri3, mother	Pre+Postnatal	-0.000596083	-0.00252292	0.00133076	-4	0.54165	0.878201	primiparity;m_bmiincl;m_hbincl;ga_days_incl;GWG;w_age;m_heightincl;m_muacincl	FALSE
CAG.914.sp000437895	Tri3, mother	Pre+Postnatal	-4.46206e-05	-0.000721605	0.000632364	-4	0.896477	0.967906	primiparity;m_hbincl;ga_days_incl;GWG;w_age;m_heightincl;m_muacincl	FALSE
Unknown_Collinsella	Tri3, mother	Pre+Postnatal	5.31698e-05	-8.53331e-05	0.000191673	4	0.449047	0.850856	primiparity;m_bmiincl;ga_days_incl;GWG;w_age;m_muacincl	FALSE
Bacteroides.intestinalis	Tri3, mother	Pre+Postnatal	0.000352029	-0.000106838	0.000810896	4	0.131564	0.827735	primiparity;m_hbincl;GWG;m_muacincl	FALSE
CAG.110.sp900540635	Tri3, mother	Pre+Postnatal	4.33301e-05	-0.000805181	0.000891841	4	0.919697	0.974929	primiparity;m_bmiincl;m_hbincl;ga_days_incl;GWG;w_age;m_heightincl;m_muacincl	FALSE
Unknown_UBA737	Tri3, mother	Pre+Postnatal	-0.000227207	-0.00172055	0.00126614	-4	0.76393	0.927318	primiparity;m_bmiincl;m_hbincl;ga_days_incl;GWG;w_age;m_heightincl;m_muacincl	FALSE
Parabacteroides.gordonii	Tri3, mother	Pre+Postnatal	-0.000522087	-0.00162772	0.000583545	-4	0.352013	0.827735	m_bmiincl;m_hbincl;ga_days_incl;GWG;w_age;m_heightincl;m_muacincl	FALSE
CAG.103.sp900317855	Tri3, mother	Pre+Postnatal	0.000108038	-0.00022571	0.000441787	4	0.523126	0.871218	m_bmiincl;m_hbincl;ga_days_incl;w_age;m_heightincl;m_muacincl	FALSE
Faecalibacterium.sp900551435	Tri3, mother	Pre+Postnatal	-0.00069994	-0.00210722	0.000707339	-4	0.327048	0.827735	primiparity;m_hbincl;ga_days_incl;GWG;w_age;m_heightincl	FALSE
Dialister.sp000434475	Tri3, mother	Pre+Postnatal	0.000603864	-0.00136822	0.00257594	4	0.545769	0.878201	primiparity;m_bmiincl;m_hbincl;ga_days_incl;GWG;w_age;m_heightincl;m_muacincl	FALSE
Streptococcus.sp900543065	Tri3, mother	Pre+Postnatal	0			0
Helicobacter_D.pullorum	Tri3, mother	Pre+Postnatal	0			0
Butyricicoccus.pullicaecorum	Tri3, mother	Pre+Postnatal	0			0
Prevotella.sp900550035	Tri3, mother	Pre+Postnatal	0.000493939	-0.000582029	0.00156991	4	0.365595	0.827735	primiparity;m_bmiincl;m_hbincl;w_age	FALSE
Angelakisella.sp004557855	Tri3, mother	Pre+Postnatal	0.000374257	-0.000469376	0.00121789	4	0.381873	0.835014	m_bmiincl;m_hbincl;ga_days_incl;GWG;m_muacincl	FALSE
Bacteroides.eggerthii	Tri3, mother	Pre+Postnatal	9.60448e-05	-0.000151923	0.000344012	4	0.445064	0.847864	primiparity;m_hbincl;GWG	FALSE
Megasphaera.elsdenii	Tri3, mother	Pre+Postnatal	-4.43026e-07	-6.81839e-05	6.72978e-05	-0.0812283	0.989699	0.996023	primiparity;m_bmiincl;m_hbincl;ga_days_incl;GWG;m_heightincl;m_muacincl	FALSE
Unknown_UBA7057	Tri3, mother	Pre+Postnatal	8.41512e-05	-0.000165548	0.00033385	4	0.506186	0.867681	primiparity;m_bmiincl;m_hbincl;ga_days_incl;GWG;w_age;m_heightincl;m_muacincl	FALSE
Unknown_Oribacterium	Tri3, mother	Pre+Postnatal	6.96693e-05	-0.00128404	0.00142338	4	0.919076	0.974929	primiparity;m_bmiincl;m_hbincl;ga_days_incl;w_age;m_heightincl;m_muacincl	FALSE
Unknown_Duodenibacillus	Tri3, mother	Pre+Postnatal	-0.000745843	-0.00185153	0.000359846	-4	0.184445	0.827735	m_bmiincl;m_hbincl;GWG;m_heightincl;m_muacincl	FALSE
Olsenella_E.sp003609875	Tri3, mother	Pre+Postnatal	-3.83621e-05	-0.000222441	0.000145716	-4	0.68085	0.909069	primiparity;m_bmiincl;m_hbincl;ga_days_incl;GWG;w_age;m_heightincl;m_muacincl	FALSE
RUG410.sp900553115	Tri3, mother	Pre+Postnatal	-0.000420108	-0.00163131	0.000791094	-4	0.49389	0.8625	primiparity;m_bmiincl;m_hbincl;ga_days_incl;GWG;w_age;m_muacincl	FALSE
UBA3789.sp900543055	Tri3, mother	Pre+Postnatal	0.000797114	-0.000269958	0.00186419	4	0.141945	0.827735	primiparity;m_bmiincl	FALSE
UBA6398.sp003150315	Tri3, mother	Pre+Postnatal	-0.00136619	-0.00266551	-6.68709e-05	-4	0.0394623	0.827735	primiparity;GWG;m_heightincl	TRUE
CAG.568.sp000434395	Tri3, mother	Pre+Postnatal	-0.000592062	-0.00142608	0.000241955	-4	0.162608	0.827735	primiparity;m_bmiincl;m_hbincl;ga_days_incl;GWG;w_age;m_heightincl;m_muacincl	FALSE
Lachnospira.sp000436535	Tri3, mother	Pre+Postnatal	-0.000547639	-0.0011297	3.44179e-05	-4	0.0649567	0.827735	m_bmiincl;m_hbincl;w_age;m_heightincl;m_muacincl	FALSE
CAG.495.sp000432275	Tri3, mother	Pre+Postnatal	8.35127e-06	-9.58127e-06	2.62838e-05	1.5312	0.358741	0.827735	primiparity;w_age;m_muacincl	FALSE
UBA11524.sp000437595	Tri3, mother	Pre+Postnatal	8.63155e-05	-0.00144008	0.00161272	4	0.911115	0.973621	m_bmiincl;m_hbincl;ga_days_incl;GWG;w_age;m_heightincl;m_muacincl	FALSE
UBA2882.sp900549665	Tri3, mother	Pre+Postnatal	0.000226335	-0.000776173	0.00122884	4	0.655934	0.905668	m_bmiincl;m_hbincl;ga_days_incl;GWG;w_age;m_heightincl;m_muacincl	FALSE
Phil1.sp001940855	Tri3, mother	Pre+Postnatal	0.000338651	-0.000929065	0.00160637	4	0.598115	0.893525	primiparity;m_bmiincl;m_hbincl;ga_days_incl;GWG;w_age;m_heightincl;m_muacincl	FALSE
CAG.83.sp900545495	Tri3, mother	Pre+Postnatal	-0.000951229	-0.00238951	0.000487057	-4	0.193079	0.827735	primiparity;m_bmiincl;m_hbincl;ga_days_incl;GWG;w_age;m_heightincl;m_muacincl	FALSE
UBA1436.sp900541355	Tri3, mother	Pre+Postnatal	-0.00038198	-0.00130345	0.000539491	-4	0.413723	0.840722	primiparity;m_bmiincl;m_hbincl;ga_days_incl;GWG;w_age;m_heightincl;m_muacincl	FALSE
Mitsuokella.multacida	Tri3, mother	Pre+Postnatal	-0.000519332	-0.00181792	0.000779259	-4	0.4304	0.840722	primiparity;m_bmiincl;m_hbincl;GWG;m_muacincl	FALSE
CAG.83.sp000435975	Tri3, mother	Pre+Postnatal	3.9227e-05	-0.000555968	0.000634422	4	0.896479	0.967906	primiparity;m_bmiincl;m_hbincl;ga_days_incl;GWG;w_age;m_heightincl;m_muacincl	FALSE
Parabacteroides.sp900549585	Tri3, mother	Pre+Postnatal	4.46238e-05	-0.00103055	0.0011198	4	0.9347	0.977858	primiparity;m_bmiincl;m_hbincl;ga_days_incl;GWG;m_heightincl;m_muacincl	FALSE
CAG.103.sp000432375	Tri3, mother	Pre+Postnatal	2.19683e-05	-0.000487877	0.000531813	4	0.932209	0.977858	primiparity;m_bmiincl;m_hbincl;ga_days_incl;GWG;w_age;m_heightincl;m_muacincl	FALSE
CAG.110.sp900554705	Tri3, mother	Pre+Postnatal	5.96965e-05	-6.13452e-05	0.000180738	4	0.331156	0.827735	primiparity;m_bmiincl;w_age;m_muacincl	FALSE
Enterobacter.cloacae_K	Tri3, mother	Pre+Postnatal	-0.000258437	-0.00119468	0.00067781	-4	0.586027	0.889815	m_bmiincl;m_hbincl;ga_days_incl;w_age;m_heightincl;m_muacincl	FALSE
Klebsiella.variicola	Tri3, mother	Pre+Postnatal	4.47745e-05	-0.000201192	0.000290741	4	0.719403	0.92714	primiparity;m_hbincl;ga_days_incl;GWG;w_age;m_heightincl	FALSE
CAG.465.sp000433755	Tri3, mother	Pre+Postnatal	-0.000174119	-0.00118487	0.000836636	-4	0.73384	0.92714	primiparity;m_bmiincl;m_hbincl;ga_days_incl;GWG;w_age;m_heightincl;m_muacincl	FALSE
Unknown_UBA636	Tri3, mother	Pre+Postnatal	7.24629e-06	-0.000188438	0.000202931	1.3286	0.941721	0.97883	primiparity;m_bmiincl;m_hbincl;ga_days_incl;GWG;w_age;m_heightincl;m_muacincl	FALSE
CAG.83.sp900549395	Tri3, mother	Pre+Postnatal	6.79649e-05	-0.0005648	0.000700729	4	0.83208	0.944357	primiparity;m_bmiincl;m_hbincl;ga_days_incl;GWG;w_age;m_heightincl;m_muacincl	FALSE
Alistipes.shahii	Tri3, mother	Pre+Postnatal	0.000112329	-0.00124458	0.00146924	4	0.870183	0.953744	primiparity;m_bmiincl;m_hbincl;ga_days_incl;GWG;w_age;m_heightincl;m_muacincl	FALSE
Butyrivibrio_A.sp000431815	Tri3, mother	Pre+Postnatal	0.000297902	-0.000304405	0.000900209	4	0.32974	0.827735	primiparity;m_hbincl;ga_days_incl;GWG;w_age;m_muacincl	FALSE
CAG.103.sp900543625	Tri3, mother	Pre+Postnatal	-0.000113642	-0.000717391	0.000490108	-4	0.710274	0.92714	primiparity;m_bmiincl;m_hbincl;GWG;w_age;m_heightincl;m_muacincl	FALSE
Unknown_CAG.877	Tri3, mother	Pre+Postnatal	-0.000156298	-0.000642899	0.000330303	-4	0.526326	0.872922	primiparity;m_hbincl;ga_days_incl;GWG;w_age;m_heightincl;m_muacincl	FALSE
Unknown_CAG.83	Tri3, mother	Pre+Postnatal	-0.000264646	-0.00210906	0.00157977	-4	0.77701	0.92898	primiparity;m_bmiincl;m_hbincl;ga_days_incl;GWG;w_age;m_heightincl	FALSE
Unknown_Gemmiger	Tri3, mother	Pre+Postnatal	-6.53102e-05	-0.00120754	0.00107692	-4	0.910125	0.973621	primiparity;m_bmiincl;m_hbincl;ga_days_incl;GWG;w_age;m_heightincl;m_muacincl	FALSE
Dysgonomonas.sp900079735	Tri3, mother	Pre+Postnatal	0			0
Bifidobacterium.pseudocatenulatum	Tri3, mother	Pre+Postnatal	-4.68717e-05	-0.000157829	6.40858e-05	-4	0.404949	0.835014	primiparity;m_hbincl;ga_days_incl;GWG;w_age;m_heightincl	FALSE
Agathobacter.sp900546625	Tri3, mother	Pre+Postnatal	-0.00064297	-0.00213661	0.000850669	-4	0.396147	0.835014	m_bmiincl;m_heightincl;m_muacincl	FALSE
CAG.83.sp900555735	Tri3, mother	Pre+Postnatal	0.000339022	-0.000221084	0.000899128	4	0.233396	0.827735	primiparity;m_hbincl;ga_days_incl;GWG;w_age	FALSE
Alistipes.sp900546065	Tri3, mother	Pre+Postnatal	-0.000219	-0.000478114	4.01142e-05	-4	0.0969354	0.827735	m_bmiincl;m_hbincl;ga_days_incl;w_age;m_heightincl;m_muacincl	FALSE
Acetatifactor.sp900554205	Tri3, mother	Pre+Postnatal	-5.09522e-05	-0.000642072	0.000540168	-4	0.864882	0.953325	primiparity;m_bmiincl;m_hbincl;ga_days_incl;GWG;w_age;m_heightincl;m_muacincl	FALSE
Veillonella.parvula	Tri3, mother	Pre+Postnatal	-1.67271e-05	-4.07833e-05	7.32903e-06	-3.0669	0.171359	0.827735	m_hbincl;ga_days_incl;GWG;w_age;m_heightincl;m_muacincl	FALSE
Alistipes.finegoldii	Tri3, mother	Pre+Postnatal	3.83591e-05	-0.000489603	0.000566321	4	0.885948	0.960684	primiparity;m_bmiincl;m_hbincl;ga_days_incl;GWG;w_age;m_heightincl;m_muacincl	FALSE
UBA1777.sp900549865	Tri3, mother	Pre+Postnatal	0.000101065	-0.000478797	0.000680926	4	0.730847	0.92714	primiparity;m_hbincl;ga_days_incl;GWG;w_age;m_heightincl;m_muacincl	FALSE
CAG.177.sp003538135	Tri3, mother	Pre+Postnatal	0.000537347	-0.000800302	0.001875	4	0.428363	0.840722	m_bmiincl;ga_days_incl;GWG;m_muacincl	FALSE
CAG.273.sp000437855	Tri3, mother	Pre+Postnatal	0.00013785	-0.000187574	0.000463273	4	0.40369	0.835014	primiparity;m_bmiincl;m_hbincl;w_age	FALSE
Ruminococcus_E.sp900314705	Tri3, mother	Pre+Postnatal	-0.000667499	-0.00183741	0.000502412	-4	0.261125	0.827735	primiparity;m_bmiincl;m_hbincl;ga_days_incl;GWG;w_age;m_heightincl;m_muacincl	FALSE
Porphyromonas.uenonis_A	Tri3, mother	Pre+Postnatal	2.11851e-06	-3.76625e-06	8.00327e-06	0.388426	0.477714	0.857816	primiparity;m_bmiincl;GWG;w_age;m_heightincl;m_muacincl	FALSE
Haemophilus_D.parainfluenzae_M	Tri3, mother	Pre+Postnatal	-1.01749e-05	-3.86662e-05	1.83163e-05	-1.86556	0.48125	0.857816	m_bmiincl;m_hbincl;w_age;m_heightincl;m_muacincl	FALSE
F23.B02.sp003533405	Tri3, mother	Pre+Postnatal	-0.000101816	-0.000552133	0.000348501	-4	0.655448	0.905668	primiparity;m_bmiincl;m_hbincl;ga_days_incl;GWG;w_age;m_heightincl;m_muacincl	FALSE
Bifidobacterium.dentium	Tri3, mother	Pre+Postnatal	-4.48046e-06	-1.14211e-05	2.46018e-06	-0.821486	0.203907	0.827735	primiparity;m_hbincl;ga_days_incl;GWG;w_age;m_heightincl	FALSE
Phocaeicola.massiliensis	Tri3, mother	Pre+Postnatal	0.000495103	-0.000330283	0.00132049	4	0.237615	0.827735	primiparity;ga_days_incl;GWG;w_age	FALSE
UBA1232.sp900544815	Tri3, mother	Pre+Postnatal	0.00018662	-1.53103e-05	0.00038855	4	0.0697918	0.827735	primiparity;m_bmiincl;m_hbincl;ga_days_incl;GWG;w_age;m_heightincl;m_muacincl	FALSE
CAG.177.sp000431775	Tri3, mother	Pre+Postnatal	-3.84112e-05	-0.000897879	0.000821057	-4	0.929696	0.977858	primiparity;m_bmiincl;m_hbincl;ga_days_incl;GWG;m_heightincl;m_muacincl	FALSE
Dialister.invisus	Tri3, mother	Pre+Postnatal	0			0
Unknown_CAG.460	Tri3, mother	Pre+Postnatal	0.000219131	-0.000136188	0.000574451	4	0.224773	0.827735	primiparity;GWG	FALSE
Rs.D84.sp900549365	Tri3, mother	Pre+Postnatal	-8.32763e-05	-0.000355627	0.000189074	-4	0.546343	0.878201	primiparity;m_bmiincl;m_hbincl;ga_days_incl;GWG;w_age;m_heightincl;m_muacincl	FALSE
RC9.sp900545245	Tri3, mother	Pre+Postnatal	0.00010479	-0.000403277	0.000612858	4	0.68399	0.910154	primiparity;m_hbincl;ga_days_incl;GWG;w_age;m_muacincl	FALSE
CAG.510.sp000434615	Tri3, mother	Pre+Postnatal	0.00017057	-0.000429989	0.000771129	4	0.575212	0.88556	primiparity;m_bmiincl;m_hbincl;ga_days_incl;GWG;w_age;m_heightincl;m_muacincl	FALSE
CAG.353.sp900066885	Tri3, mother	Pre+Postnatal	9.65917e-05	-0.000120401	0.000313585	4	0.380196	0.835014	primiparity;m_bmiincl;m_hbincl;ga_days_incl;GWG;w_age;m_heightincl;m_muacincl	FALSE
Unknown_CAG.103	Tri3, mother	Pre+Postnatal	-0.000286473	-0.000853739	0.000280792	-4	0.319703	0.827735	primiparity;m_bmiincl;ga_days_incl;GWG;w_age;m_muacincl	FALSE
Prevotellamassilia.sp900542795	Tri3, mother	Pre+Postnatal	-0.000420653	-0.00116539	0.000324084	-4	0.265914	0.827735	primiparity;m_bmiincl;m_hbincl;ga_days_incl;GWG;w_age;m_heightincl;m_muacincl	FALSE
CAG.83.sp003539495	Tri3, mother	Pre+Postnatal	-5.17921e-05	-0.000984982	0.000881398	-4	0.912752	0.973999	primiparity;m_bmiincl;m_hbincl;ga_days_incl;GWG;w_age;m_heightincl;m_muacincl	FALSE
RF16.sp900556095	Tri3, mother	Pre+Postnatal	-0.000160385	-0.000641034	0.000320264	-4	0.510426	0.867993	primiparity;m_bmiincl;GWG;w_age;m_heightincl;m_muacincl	FALSE
UBA4644.sp900555855	Tri3, mother	Pre+Postnatal	0.000296738	-0.000857679	0.00145116	4	0.611997	0.895766	primiparity;m_bmiincl;m_hbincl;ga_days_incl;GWG;w_age;m_heightincl;m_muacincl	FALSE
F082.sp002633315	Tri3, mother	Pre+Postnatal	0.000283186	-0.000145112	0.000711483	4	0.193221	0.827735	primiparity;m_bmiincl;m_hbincl;GWG;w_age;m_muacincl	FALSE
Haemophilus.sp002998595	Tri3, mother	Pre+Postnatal	0			0
Dialister.sp900343095	Tri3, mother	Pre+Postnatal	0.000236758	-0.000196795	0.000670311	4	0.282053	0.827735	primiparity;m_bmiincl;m_hbincl;ga_days_incl;GWG;w_age;m_muacincl	FALSE
RUG841.sp900313795	Tri3, mother	Pre+Postnatal	0.000398227	-0.00017958	0.000976034	4	0.175199	0.827735	w_age	FALSE
Unknown_UMGS902	Tri3, mother	Pre+Postnatal	0.000131219	-0.000786048	0.00104848	4	0.777651	0.92898	primiparity;m_bmiincl;m_hbincl;ga_days_incl;GWG;w_age;m_heightincl;m_muacincl	FALSE
Anaerotignum.lactatifermentans	Tri3, mother	Pre+Postnatal	0			0
CAG.170.sp000436735	Tri3, mother	Pre+Postnatal	4.89915e-05	-0.000583256	0.000681239	4	0.878419	0.955409	primiparity;m_bmiincl;m_hbincl;ga_days_incl;GWG;w_age;m_heightincl;m_muacincl	FALSE
CAG.390.sp000437015	Tri3, mother	Pre+Postnatal	3.66792e-05	-0.000656621	0.000729979	4	0.916816	0.974216	primiparity;m_bmiincl;m_hbincl;ga_days_incl;GWG;w_age;m_heightincl;m_muacincl	FALSE
Phascolarctobacterium_A.succinatutens	Tri3, mother	Pre+Postnatal	-0.000563815	-0.00216886	0.00104123	-4	0.488386	0.861202	primiparity;m_bmiincl;m_hbincl;ga_days_incl;GWG;w_age;m_heightincl;m_muacincl	FALSE
PeH17.sp000435055	Tri3, mother	Pre+Postnatal	7.34514e-05	-0.000802818	0.00094972	4	0.868574	0.953573	primiparity;m_bmiincl;m_hbincl;ga_days_incl;GWG;w_age;m_muacincl	FALSE
Prevotella.sp000834015	Tri3, mother	Pre+Postnatal	-0.000807413	-0.00202183	0.000407001	-4	0.190751	0.827735	primiparity;m_bmiincl;m_hbincl;ga_days_incl;GWG;w_age;m_heightincl;m_muacincl	FALSE
Unknown_RUG841	Tri3, mother	Pre+Postnatal	3.24448e-05	-0.000607876	0.000672766	4	0.920319	0.974929	primiparity;m_bmiincl;m_hbincl;ga_days_incl;GWG;w_age;m_heightincl;m_muacincl	FALSE
CAG.793.sp000433915	Tri3, mother	Pre+Postnatal	-0.00045038	-0.00119992	0.000299163	-4	0.236801	0.827735	m_hbincl;ga_days_incl;w_age;m_heightincl;m_muacincl	FALSE
Unknown_UBA2903	Tri3, mother	Pre+Postnatal	0.000509479	-0.000246318	0.00126528	4	0.184714	0.827735	primiparity;m_bmiincl;m_hbincl;ga_days_incl;GWG;w_age;m_heightincl	FALSE
Gemmiger.qucibialis	Tri3, mother	Pre+Postnatal	6.12195e-05	-0.000969614	0.00109205	4	0.906676	0.972016	primiparity;m_hbincl;ga_days_incl;GWG;m_heightincl;m_muacincl	FALSE
Acidaminococcus.massiliensis	Tri3, mother	Pre+Postnatal	0			0
DTU089_A.sp002440045	Tri3, mother	Pre+Postnatal	-0.000242179	-0.000774639	0.00029028	-4	0.369959	0.827735	primiparity;m_bmiincl;m_hbincl;ga_days_incl;w_age;m_heightincl;m_muacincl	FALSE
ER4.sp900556145	Tri3, mother	Pre+Postnatal	-1.59229e-05	-0.000124519	9.26727e-05	-2.91945	0.772264	0.927318	primiparity;m_bmiincl;m_hbincl;ga_days_incl;w_age;m_heightincl;m_muacincl	FALSE
Unknown_CAG.465_1	Tri3, mother	Pre+Postnatal	0.000249728	-0.000502746	0.0010022	4	0.512737	0.867993	m_bmiincl;m_hbincl;GWG;w_age;m_muacincl	FALSE
CAG.488.sp003486665	Tri3, mother	Pre+Postnatal	2.98015e-05	-0.00015961	0.000219213	4	0.756167	0.927318	m_hbincl;ga_days_incl;GWG;w_age;m_muacincl	FALSE
Angelakisella.sp900547385	Tri3, mother	Pre+Postnatal	-7.40716e-05	-0.00123913	0.00109099	-4	0.900116	0.969694	primiparity;m_bmiincl;m_hbincl;ga_days_incl;GWG;w_age;m_heightincl;m_muacincl	FALSE
Oscillibacter.sp001916835	Tri3, mother	Pre+Postnatal	-0.00024958	-0.000924527	0.000425366	-4	0.465818	0.857816	primiparity;m_bmiincl;m_hbincl;ga_days_incl;GWG;w_age;m_heightincl;m_muacincl	FALSE
CAG.83.sp001916855	Tri3, mother	Pre+Postnatal	9.47136e-05	-0.000551273	0.000740701	4	0.772287	0.927318	m_bmiincl;m_hbincl;ga_days_incl;GWG;w_age;m_muacincl	FALSE
Alistipes.putredinis	Tri3, mother	Pre+Postnatal	0.000511581	-0.000111815	0.00113498	4	0.106947	0.827735	m_hbincl;GWG;w_age	FALSE
CAG.632.sp900539185	Tri3, mother	Pre+Postnatal	-0.000236895	-0.000950323	0.000476532	-4	0.512513	0.867993	m_hbincl;ga_days_incl;GWG;w_age;m_heightincl	FALSE
CAG.110.sp000434635	Tri3, mother	Pre+Postnatal	-9.30015e-06	-0.00064545	0.00062685	-1.70517	0.976974	0.995011	primiparity;m_bmiincl;m_hbincl;ga_days_incl;GWG;w_age;m_heightincl;m_muacincl	FALSE
Unknown_Roseburia	Tri3, mother	Pre+Postnatal	-0.000180156	-0.000583437	0.000223125	-4	0.378584	0.835014	m_hbincl;ga_days_incl;w_age;m_muacincl	FALSE
Dysgonomonas.mossii	Tri3, mother	Pre+Postnatal	0			0
Ureaplasma.sp900544585	Tri3, mother	Pre+Postnatal	1.0496e-05	-6.67529e-06	2.76673e-05	1.92443	0.228856	0.827735	primiparity;ga_days_incl;GWG;w_age	FALSE
Bifidobacterium.sp002742445	Tri3, mother	Pre+Postnatal	0.000131191	-0.000194392	0.000456774	4	0.426911	0.840722	primiparity;m_hbincl;ga_days_incl;GWG;m_heightincl;m_muacincl	FALSE
CAG.83.sp900552725	Tri3, mother	Pre+Postnatal	-7.93474e-06	-0.000675648	0.000659779	-1.45482	0.981283	0.995887	primiparity;m_bmiincl;m_hbincl;ga_days_incl;GWG;w_age;m_heightincl;m_muacincl	FALSE
CAG.81.sp900066535	Tri3, mother	Pre+Postnatal	-2.6538e-05	-8.64854e-05	3.34094e-05	-4	0.382815	0.835014	primiparity;m_bmiincl;m_hbincl;ga_days_incl;GWG;w_age;m_heightincl;m_muacincl	FALSE
Lachnospira.rogosae	Tri3, mother	Pre+Postnatal	-0.000437926	-0.00116766	0.000291807	-4	0.237371	0.827735	m_bmiincl;m_hbincl;GWG;w_age;m_heightincl;m_muacincl	FALSE
CAG.83.sp900551355	Tri3, mother	Pre+Postnatal	0.000288916	-0.000549551	0.00112738	4	0.496764	0.865216	primiparity;m_hbincl;ga_days_incl;GWG;m_heightincl	FALSE
Phascolarctobacterium_A.sp900551335	Tri3, mother	Pre+Postnatal	-0.000827523	-0.00187964	0.000224591	-4	0.12217	0.827735	m_bmiincl;ga_days_incl;GWG;m_heightincl;m_muacincl	FALSE
Unknown_CAG.488	Tri3, mother	Pre+Postnatal	-4.26255e-05	-8.87164e-05	3.46535e-06	-4	0.0696067	0.827735	primiparity;m_hbincl;ga_days_incl;GWG;w_age;m_heightincl	FALSE
Prevotella.melaninogenica	Tri3, mother	Pre+Postnatal	0			0
Faecalibacterium.prausnitzii_C	Tri3, mother	Pre+Postnatal	-0.000265163	-0.00117434	0.000644018	-4	0.565039	0.884292	primiparity;m_bmiincl;m_hbincl;GWG;m_heightincl;m_muacincl	FALSE
Unknown_UMGS1883_2	Tri3, mother	Pre+Postnatal	3.53134e-05	-0.000347128	0.000417755	4	0.855375	0.951314	m_bmiincl;m_hbincl;ga_days_incl;GWG;w_age;m_muacincl	FALSE
Unknown_Eubacterium_R	Tri3, mother	Pre+Postnatal	0.000452313	-0.00028121	0.00118584	4	0.224823	0.827735	primiparity;m_hbincl;w_age	FALSE
Ligilactobacillus.salivarius	Tri3, mother	Pre+Postnatal	-1.74412e-06	-1.31342e-05	9.646e-06	-0.319782	0.762457	0.927318	primiparity;m_bmiincl;m_hbincl;ga_days_incl;GWG;w_age;m_heightincl;m_muacincl	FALSE
UBA6382.sp900557555	Tri3, mother	Pre+Postnatal	0.000218187	-0.000699646	0.00113602	4	0.638999	0.90076	primiparity;m_bmiincl;m_hbincl;ga_days_incl;GWG;w_age;m_muacincl	FALSE
UMGS1781.sp900554635	Tri3, mother	Pre+Postnatal	8.44404e-05	-3.82796e-05	0.00020716	4	0.175845	0.827735	primiparity;m_bmiincl;m_hbincl;ga_days_incl;GWG;w_age	FALSE
Barnesiella.intestinihominis	Tri3, mother	Pre+Postnatal	0.000112626	-0.000404031	0.000629284	4	0.667038	0.905668	primiparity;m_bmiincl;m_hbincl;ga_days_incl;GWG;w_age;m_heightincl;m_muacincl	FALSE
CAG.194.sp000432915	Tri3, mother	Pre+Postnatal	0.000263977	-0.000274788	0.000802742	4	0.334296	0.827735	primiparity;m_hbincl;ga_days_incl;w_age;m_heightincl	FALSE
CAG.417.sp000432835	Tri3, mother	Pre+Postnatal	0.000370578	-0.000300412	0.00104157	4	0.276686	0.827735	primiparity;m_bmiincl;m_hbincl;w_age;m_muacincl	FALSE
Eubacterium_R.sp003526845	Tri3, mother	Pre+Postnatal	-3.85737e-05	-0.000718239	0.000641091	-4	0.910789	0.973621	primiparity;m_bmiincl;m_hbincl;ga_days_incl;GWG;w_age;m_heightincl;m_muacincl	FALSE
UBA5809.sp002417965	Tri3, mother	Pre+Postnatal	0			0
Rs.D84.sp900550565	Tri3, mother	Pre+Postnatal	3.19758e-05	-0.000321509	0.00038546	4	0.85827	0.951314	primiparity;m_bmiincl;m_hbincl;ga_days_incl;GWG;w_age;m_heightincl;m_muacincl	FALSE
RC9.sp000434935	Tri3, mother	Pre+Postnatal	0.000534183	-0.000500443	0.00156881	4	0.309037	0.827735	primiparity;m_bmiincl;m_hbincl;w_age;m_heightincl;m_muacincl	FALSE
Unknown_CAG.1000_1	Tri3, mother	Pre+Postnatal	-0.000258507	-0.000679621	0.000162606	-4	0.226822	0.827735	primiparity;m_bmiincl;m_hbincl;ga_days_incl;GWG;w_age;m_heightincl;m_muacincl	FALSE
CAG.170.sp000432135	Tri3, mother	Pre+Postnatal	0.000453816	-0.000437346	0.00134498	4	0.315639	0.827735	primiparity;m_bmiincl;m_hbincl;ga_days_incl;GWG;w_age;m_heightincl;m_muacincl	FALSE
Veillonella.sp900550455	Tri3, mother	Pre+Postnatal	-2.90331e-05	-6.92295e-05	1.11634e-05	-4	0.155503	0.827735	m_hbincl;w_age;m_heightincl	FALSE
Parabacteroides.sp900541965	Tri3, mother	Pre+Postnatal	0			0
Butyrivibrio_A.crossotus	Tri3, mother	Pre+Postnatal	2.73519e-05	-0.000608962	0.000663666	4	0.932371	0.977858	primiparity;m_bmiincl;m_hbincl;ga_days_incl;GWG;w_age;m_heightincl;m_muacincl	FALSE
Bifidobacterium.catenulatum	Tri3, mother	Pre+Postnatal	0			0
[truncated: 7,853 more rows]

## Sheet: gut_pathogens
feature	timepoint	intervention	estimate	conf_low_semi	conf_high_semi	estimate_scaled	p.value	q.value	covariate	sig	from_xgb	from_boruta	best_auc
Plesiomonas shigelloides	Tri3	Prenatal	0.305328	-0.276753	0.887747	1.41422	0.302358	1	m_bmiincl;m_hbincl;ga_days_incl;GWG;w_age;m_heightincl;m_muacincl	FALSE
Campylobacter concisus	Tri3	Prenatal	0.504053	-0.00985243	1.0309	2.33468	0.0570604	0.870062	primiparity	FALSE
Entamoeba pan	Tri3	Prenatal	0.483463	0.00844355	0.963435	2.23931	0.0469168	0.870062	primiparity;m_bmiincl;m_muacincl	TRUE
Shiga toxin producing E.coli stx1	Tri3	Prenatal	-0.168399	-0.972334	0.604392	-0.779992	0.672696	1	primiparity;m_bmiincl;m_hbincl;ga_days_incl;GWG;w_age;m_heightincl;m_muacincl	FALSE
Enteropathogene E.coli eae	Tri3	Prenatal	0.0673276	-0.412885	0.549177	0.311849	0.783538	1	primiparity;m_bmiincl;ga_days_incl;w_age;m_heightincl;m_muacincl	FALSE
Enteroaggregative E.coli aatA	Tri3	Prenatal	0.405106	-0.0811996	0.893979	1.87637	0.102933	0.870062	m_bmiincl;m_hbincl;ga_days_incl;GWG;w_age;m_heightincl;m_muacincl	FALSE
Blastocystis hominis	Tri3	Prenatal	0.337432	-0.556064	1.29602	1.56292	0.469187	1	primiparity;m_bmiincl;m_hbincl;ga_days_incl;GWG;w_age;m_heightincl;m_muacincl	FALSE
Giardia lamblia	Tri3	Prenatal	0.214818	-0.271769	0.702136	0.994994	0.386533	1	primiparity;m_bmiincl;m_hbincl;ga_days_incl;GWG;w_age;m_heightincl;m_muacincl	FALSE
Cyclospora cayetanensis	Tri3	Prenatal	-0.222694	-3.38804	2.36299	-1.03148	0.865368	1	primiparity;m_bmiincl;m_hbincl;ga_days_incl;GWG;m_heightincl;m_muacincl	FALSE
Isospora belli	Tri3	Prenatal	0.36232	-1.41036	2.15922	1.6782	0.677152	1	primiparity;m_bmiincl;m_hbincl;ga_days_incl;GWG;w_age;m_heightincl;m_muacincl	FALSE
Cryptosporidium	Tri3	Prenatal	-12.0361	-5693.3	6178.45	-4	0.999845	1	primiparity;m_hbincl;m_heightincl	FALSE
Clostridium difficile	Tri3	Prenatal	-0.12829	-3.42877	2.71605	-0.594214	0.927262	1	primiparity;m_bmiincl;m_hbincl;ga_days_incl;GWG;w_age;m_heightincl;m_muacincl	FALSE
Mycobacterium tuberculosis	Tri3	Prenatal	0.416852	-4.0331	5.89329	1.93078	0.843626	1	primiparity;m_bmiincl;m_hbincl;ga_days_incl;GWG;w_age;m_heightincl;m_muacincl	FALSE
Sapovirus-I-II-IV	Tri3	Prenatal	-12.0361	-5693.3	6178.45	-4	0.999845	1	primiparity;m_hbincl;m_heightincl	FALSE
Enterotoxigenic E.coli coli surface 3	Tri3	Prenatal	-0.222694	-3.38804	2.36299	-1.03148	0.865368	1	primiparity;m_bmiincl;m_hbincl;ga_days_incl;GWG;m_heightincl;m_muacincl	FALSE
Ascaris lumbricoides	Tri3	Prenatal	-0.222694	-3.38804	2.36299	-1.03148	0.865368	1	primiparity;m_bmiincl;m_hbincl;ga_days_incl;GWG;m_heightincl;m_muacincl	FALSE
Enterocytozoon bieneusi	Tri3	Prenatal	0.394588	-1.93748	2.78963	1.82766	0.724838	1	primiparity;m_bmiincl;m_hbincl;ga_days_incl;GWG;m_heightincl;m_muacincl	FALSE
Encephalytozoon intestinalis	Tri3	Prenatal	-0.222694	-3.38804	2.36299	-1.03148	0.865368	1	primiparity;m_bmiincl;m_hbincl;ga_days_incl;GWG;m_heightincl;m_muacincl	FALSE
ShEgyrA83S	Tri3	Prenatal	-0.222694	-3.38804	2.36299	-1.03148	0.865368	1	primiparity;m_bmiincl;m_hbincl;ga_days_incl;GWG;m_heightincl;m_muacincl	FALSE
Enterotoxigenic E.coli coli surface 6	Tri3	Prenatal	-0.222694	-3.38804	2.36299	-1.03148	0.865368	1	primiparity;m_bmiincl;m_hbincl;ga_days_incl;GWG;m_heightincl;m_muacincl	FALSE
Enterotoxigenic E.coli coli surface 5	Tri3	Prenatal	-17.1966		428.704	-4	0.994794	1		FALSE
Enterotoxigenic E.coli colonization factor antigen I	Tri3	Prenatal	-0.222694	-3.38804	2.36299	-1.03148	0.865368	1	primiparity;m_bmiincl;m_hbincl;ga_days_incl;GWG;m_heightincl;m_muacincl	FALSE
Enterotoxigenic E.coli coli surface 1	Tri3	Prenatal	-0.222694	-3.38804	2.36299	-1.03148	0.865368	1	primiparity;m_bmiincl;m_hbincl;ga_days_incl;GWG;m_heightincl;m_muacincl	FALSE
Ancylostoma duodenale	Tri3	Prenatal	-0.222694	-3.38804	2.36299	-1.03148	0.865368	1	primiparity;m_bmiincl;m_hbincl;ga_days_incl;GWG;m_heightincl;m_muacincl	FALSE
Campylobacter_jejuni_coli	Tri3	Prenatal	-17.4972		916.078	-4	0.996787	1		FALSE
Vibrio cholerae	Tri3	Prenatal	-17.4972		916.078	-4	0.996787	1		FALSE
Helicobacter pylori	Tri3	Prenatal	-0.828808	-1.88842	0.103123	-3.83888	0.0969686	0.870062	ga_days_incl;GWG	FALSE
Campylobacter_pan	Tri3	Prenatal	-17.4972		916.078	-4	0.996787	1		FALSE
Shigella_flexneri_6	Tri3	Prenatal	-17.4972		916.078	-4	0.996787	1		FALSE
Enteroaggregative E.coli aggR	Tri3	Prenatal	0.840915	0.341936	1.34878	3.89496	0.00103975	0.0675835	primiparity;m_bmiincl;m_muacincl	TRUE	FALSE	TRUE	0.664223
Bacteroides fragilis	Tri3	Prenatal	-0.716834	-1.41073	-0.0644033	-3.32024	0.0357511	0.870062	primiparity;m_bmiincl;m_hbincl;ga_days_incl;GWG;w_age;m_heightincl;m_muacincl	TRUE
Adenovirus serotypes 40 et 41	Tri3	Prenatal	0.831065	-1.59145	3.93792	3.84933	0.509402	1	primiparity;m_bmiincl;m_hbincl;GWG;w_age;m_muacincl	FALSE
Campylobacter troglodytis	Tri3	Prenatal	0.332651	-0.167723	0.835298	1.54077	0.19281	1	primiparity;m_bmiincl;m_hbincl;ga_days_incl;GWG;w_age;m_heightincl;m_muacincl	FALSE
Shigella/Enteroinvasive E.coli	Tri3	Prenatal	-0.0534167	-0.649595	0.532993	-0.247416	0.85895	1	primiparity;m_bmiincl;m_hbincl;ga_days_incl;GWG;w_age;m_heightincl;m_muacincl	FALSE
Campylobacter infans	Tri3	Prenatal	0.344656	-0.293079	0.983924	1.59638	0.287947	1	primiparity;m_bmiincl;m_hbincl;GWG;m_heightincl;m_muacincl	FALSE
Shiga toxin producing E.coli stx2	Tri3	Prenatal	-0.105177	-0.920166	0.680597	-0.48716	0.794951	1	primiparity;m_bmiincl;m_hbincl;ga_days_incl;GWG;w_age;m_heightincl;m_muacincl	FALSE
Enterotoxigenic E.coli thermolabile	Tri3	Prenatal	0.283201	-0.28547	0.851806	1.31173	0.327476	1	primiparity;m_bmiincl;m_heightincl	FALSE
Shigella flexneri serotype 6	Tri3	Prenatal	-0.233537	-1.14774	0.630982	-1.0817	0.602399	1	primiparity;m_bmiincl;m_hbincl;ga_days_incl;GWG;w_age;m_heightincl;m_muacincl	FALSE
Shigella flexneri non serotype 6	Tri3	Prenatal	-0.839785	-1.9075	0.100754	-3.88973	0.0954876	0.870062	primiparity;m_bmiincl;m_hbincl;ga_days_incl;GWG;w_age;m_heightincl;m_muacincl	FALSE
Hymenolepis nana	Tri3	Prenatal	-1.31765	-3.24915	0.121778	-4	0.107085	0.870062	primiparity;m_bmiincl;m_hbincl;ga_days_incl;GWG;w_age;m_heightincl;m_muacincl	FALSE
Campylobacter Pan	Tri3	Prenatal	0.44805	-0.214343	1.11703	2.07528	0.184661	1	m_hbincl;w_age;m_heightincl;m_muacincl	FALSE
Enteropathogene E.coli bfpA	Tri3	Prenatal	-0.277272	-1.23498	0.619025	-1.28427	0.552251	1	primiparity;m_bmiincl;m_hbincl;ga_days_incl;GWG;w_age;m_heightincl;m_muacincl	FALSE
Epstein-Barr Virus	Tri3	Prenatal	-0.401173	-2.23401	1.2633	-1.85816	0.640852	1	primiparity;m_bmiincl;m_hbincl;ga_days_incl;GWG;w_age;m_heightincl;m_muacincl	FALSE
Enteroaggregative E.coli aaiC	Tri3	Prenatal	0.0263535	-0.560486	0.606575	0.122064	0.929224	1	primiparity;m_bmiincl;m_hbincl;ga_days_incl;GWG;w_age;m_heightincl;m_muacincl	FALSE
Campylobacter jejuni/coli	Tri3	Prenatal	0.583816	-0.612069	1.85006	2.70413	0.340984	1	primiparity;m_bmiincl;m_hbincl;ga_days_incl;GWG;w_age;m_muacincl	FALSE
Aeromonas	Tri3	Prenatal	0.411489	-0.441785	1.27528	1.90594	0.342551	1	m_bmiincl;m_hbincl;ga_days_incl;GWG;w_age;m_heightincl	FALSE
Rotavirus	Tri3	Prenatal	-18.1701		662.793	-4	0.996426	1	w_age	FALSE
Enterotoxigenic E.coli thermostable	Tri3	Prenatal	-0.573805	-1.5942	0.35605	-2.65776	0.241957	1	primiparity;m_bmiincl;m_hbincl;ga_days_incl;GWG;w_age;m_heightincl;m_muacincl	FALSE
Taenia solium	Tri3	Prenatal	18.7415	-1128.66		4	0.997234	1	primiparity;m_bmiincl	FALSE
Norovirus GI	Tri3	Prenatal	0.43587	-1.47025	2.53476	2.01887	0.65095	1	primiparity;m_bmiincl;m_hbincl;ga_days_incl;GWG;m_heightincl;m_muacincl	FALSE
Schistosoma	Tri3	Prenatal	118.679	-1023.05	5997.49	4	0.988625	1	primiparity;m_bmiincl;m_hbincl;ga_days_incl;GWG;w_age;m_heightincl;m_muacincl	FALSE
Shigella sonnei serotype 1	Tri3	Prenatal	-0.150452	-2.26348	1.745	-0.696865	0.876114	1	primiparity;m_bmiincl;m_hbincl;ga_days_incl;GWG;w_age;m_heightincl;m_muacincl	FALSE
Campylobacter upsaliensis	Tri3	Prenatal	-17.6084		350.279	-4	0.99467	1		FALSE	FALSE	TRUE	0.664223
Strongyloides stercoralis	Tri3	Prenatal	19.2081	-1858.65		4	0.998271	1	primiparity	FALSE
Norovirus GII	Tri3	Prenatal	-0.382327	-5.34082	3.74482	-1.77087	0.845722	1	primiparity;m_bmiincl;m_hbincl;ga_days_incl;GWG;w_age;m_heightincl;m_muacincl	FALSE
Cryptosporidium hominis	Tri3	Prenatal	-1.52071e-14			-3.94295e-14	1	1		FALSE
Astrovirus	Tri3	Prenatal	-1.52071e-14			-3.94295e-14	1	1		FALSE
Oxacillinases	Tri3	Prenatal	18.8388	-1744.9		4	0.998202	1	primiparity;m_hbincl	FALSE
Sapovirus	Tri3	Prenatal	-1.52071e-14			-3.94295e-14	1	1		FALSE
Norovirus GII4	Tri3	Prenatal	-1.52071e-14			-3.94295e-14	1	1		FALSE
Norovirus GI1	Tri3	Prenatal	-1.52071e-14			-3.94295e-14	1	1		FALSE
Cryptosporidium parvum	Tri3	Prenatal	-1.52071e-14			-3.94295e-14	1	1		FALSE
Necator americanus	Tri3	Prenatal	-18.4869		1290.86	-4	0.997614	1	primiparity	FALSE
Salmonella tetrathionate reductase gene	Tri3	Prenatal	0.553387	-0.631771	1.80749	2.56318	0.362055	1	m_bmiincl;m_hbincl;ga_days_incl;GWG;w_age;m_heightincl;m_muacincl	FALSE
Salmonella invasion gene A	Tri3	Prenatal	0.436041	-0.715457	1.61961	2.01966	0.454574	1	primiparity;m_bmiincl;m_hbincl;ga_days_incl;GWG;w_age;m_heightincl;m_muacincl	FALSE
Plesiomonas shigelloides	1–2m	Pre+Postnatal	1.45507e-14			9.84029e-14	1	1		FALSE
Campylobacter concisus	1–2m	Pre+Postnatal	1.12781	-0.34897	2.80941	4	0.148758	1	primiparity;GWG	FALSE
Entamoeba pan	1–2m	Pre+Postnatal	1.45507e-14			9.84029e-14	1	1		FALSE
Shiga toxin producing E.coli stx1	1–2m	Pre+Postnatal	1.45507e-14			9.84029e-14	1	1		FALSE
Enteropathogene E.coli eae	1–2m	Pre+Postnatal	1.60944	-0.344703	4.60221	4	0.156576	1		FALSE
Enteroaggregative E.coli aatA	1–2m	Pre+Postnatal	-0.0230711	-0.896686	0.861838	-0.106861	0.958749	1	primiparity;m_bmiincl;m_hbincl;GWG;w_age;m_muacincl	FALSE
Blastocystis hominis	1–2m	Pre+Postnatal	1.45507e-14			9.84029e-14	1	1		FALSE
Giardia lamblia	1–2m	Pre+Postnatal	-1.40361	-4.56528	0.732331	-4	0.259017	1	primiparity;GWG;m_heightincl	FALSE
Cyclospora cayetanensis	1–2m	Pre+Postnatal	1.45507e-14			9.84029e-14	1	1		FALSE
Isospora belli	1–2m	Pre+Postnatal	1.45507e-14			9.84029e-14	1	1		FALSE
Cryptosporidium	1–2m	Pre+Postnatal	1.74344	-0.516891	5.05045	4	0.181388	1	m_hbincl;ga_days_incl	FALSE
Clostridium difficile	1–2m	Pre+Postnatal	4.41073	-1.87343	19.8648	4	0.339015	1	primiparity;m_hbincl;ga_days_incl;GWG;w_age;m_heightincl;m_muacincl	FALSE
Mycobacterium tuberculosis	1–2m	Pre+Postnatal	1.45507e-14			9.84029e-14	1	1		FALSE
Sapovirus-I-II-IV	1–2m	Pre+Postnatal	1.45507e-14			9.84029e-14	1	1		FALSE
Enterotoxigenic E.coli coli surface 3	1–2m	Pre+Postnatal	1.45507e-14			9.84029e-14	1	1		FALSE
Ascaris lumbricoides	1–2m	Pre+Postnatal	1.45507e-14			9.84029e-14	1	1		FALSE
Enterocytozoon bieneusi	1–2m	Pre+Postnatal	1.45507e-14			9.84029e-14	1	1		FALSE
Encephalytozoon intestinalis	1–2m	Pre+Postnatal	1.45507e-14			9.84029e-14	1	1		FALSE
ShEgyrA83S	1–2m	Pre+Postnatal	1.45507e-14			9.84029e-14	1	1		FALSE
Enterotoxigenic E.coli coli surface 6	1–2m	Pre+Postnatal	1.45507e-14			9.84029e-14	1	1		FALSE
Enterotoxigenic E.coli coli surface 5	1–2m	Pre+Postnatal	1.45507e-14			9.84029e-14	1	1		FALSE
Enterotoxigenic E.coli colonization factor antigen I	1–2m	Pre+Postnatal	1.45507e-14			9.84029e-14	1	1		FALSE
Enterotoxigenic E.coli coli surface 1	1–2m	Pre+Postnatal	1.45507e-14			9.84029e-14	1	1		FALSE
Ancylostoma duodenale	1–2m	Pre+Postnatal	1.45507e-14			9.84029e-14	1	1		FALSE
Campylobacter_jejuni_coli	1–2m	Pre+Postnatal	1.45507e-14			9.84029e-14	1	1		FALSE
Vibrio cholerae	1–2m	Pre+Postnatal	1.45507e-14			9.84029e-14	1	1		FALSE
Helicobacter pylori	1–2m	Pre+Postnatal	1.45507e-14			9.84029e-14	1	1		FALSE
Campylobacter_pan	1–2m	Pre+Postnatal	1.45507e-14			9.84029e-14	1	1		FALSE
Shigella_flexneri_6	1–2m	Pre+Postnatal	1.45507e-14			9.84029e-14	1	1		FALSE
Enteroaggregative E.coli aggR	1–2m	Pre+Postnatal	-0.461841	-1.31233	0.380686	-2.13916	0.282538	1	GWG;w_age	FALSE
Bacteroides fragilis	1–2m	Pre+Postnatal	-0.0876686	-1.55282	1.29692	-0.406064	0.90145	1	primiparity;ga_days_incl;GWG;m_heightincl	FALSE
Adenovirus serotypes 40 et 41	1–2m	Pre+Postnatal	0.231231	-3.1745	3.88994	1.07102	0.883445	1	primiparity;m_bmiincl;m_hbincl;ga_days_incl;GWG;w_age	FALSE
Campylobacter troglodytis	1–2m	Pre+Postnatal	-0.299043	-1.73396	1.02906	-1.38511	0.663479	1	ga_days_incl;GWG;m_muacincl	FALSE
Shigella/Enteroinvasive E.coli	1–2m	Pre+Postnatal	1.45507e-14			9.84029e-14	1	1		FALSE
Campylobacter infans	1–2m	Pre+Postnatal	-0.282113	-1.95511	1.24271	-1.3067	0.720098	1	primiparity;m_bmiincl;GWG;m_muacincl	FALSE
Shiga toxin producing E.coli stx2	1–2m	Pre+Postnatal	1.45507e-14			9.84029e-14	1	1		FALSE
Enterotoxigenic E.coli thermolabile	1–2m	Pre+Postnatal	0.267843	-1.24477	1.80538	1.2406	0.722832	1	m_hbincl;GWG;w_age;m_heightincl;m_muacincl	FALSE
Shigella flexneri serotype 6	1–2m	Pre+Postnatal	1.45507e-14			9.84029e-14	1	1		FALSE
Shigella flexneri non serotype 6	1–2m	Pre+Postnatal	1.45507e-14			9.84029e-14	1	1		FALSE
Hymenolepis nana	1–2m	Pre+Postnatal	1.45507e-14			9.84029e-14	1	1		FALSE
Campylobacter Pan	1–2m	Pre+Postnatal	1.37263	0.253706	2.63613	4	0.0215797	0.701339	m_hbincl;GWG	TRUE
Enteropathogene E.coli bfpA	1–2m	Pre+Postnatal	1.45507e-14			9.84029e-14	1	1		FALSE	FALSE	TRUE	0.353175
Epstein-Barr Virus	1–2m	Pre+Postnatal	1.45507e-14			9.84029e-14	1	1		FALSE
Enteroaggregative E.coli aaiC	1–2m	Pre+Postnatal	-0.348439	-2.3922	1.56215	-1.6139	0.718832	1	primiparity;m_bmiincl;m_hbincl;ga_days_incl;GWG;w_age;m_heightincl	FALSE
Campylobacter jejuni/coli	1–2m	Pre+Postnatal	2.33688	0.824524	4.42364	4	0.00786847	0.51145	m_hbincl;GWG;m_heightincl	TRUE	FALSE	TRUE	0.491071
Campylobacter jejuni/coli	1–2m	Pre+Postnatal	2.33688	0.824524	4.42364	4	0.00786847	0.51145	m_hbincl;GWG;m_heightincl	TRUE	FALSE	TRUE	0.622768
Aeromonas	1–2m	Pre+Postnatal	84.8626	-3407.57	3577.29	4	0.997764	1	GWG	FALSE
Rotavirus	1–2m	Pre+Postnatal	1.43847	-0.381929	3.6342	4	0.142699	1	GWG;m_heightincl	FALSE
Enterotoxigenic E.coli thermostable	1–2m	Pre+Postnatal	-0.204976	-3.61545	2.69469	-0.94941	0.888339	1	primiparity;m_bmiincl;m_hbincl;GWG;w_age	FALSE
Taenia solium	1–2m	Pre+Postnatal	1.45507e-14			9.84029e-14	1	1		FALSE
Norovirus GI	1–2m	Pre+Postnatal	18.4306	-630.598		4	0.996236	1		FALSE
Schistosoma	1–2m	Pre+Postnatal	1.45507e-14			9.84029e-14	1	1		FALSE
Shigella sonnei serotype 1	1–2m	Pre+Postnatal	1.45507e-14			9.84029e-14	1	1		FALSE
Campylobacter upsaliensis	1–2m	Pre+Postnatal	-0.310751	-3.51198	2.33955	-1.43934	0.817105	1	primiparity;m_bmiincl;m_hbincl;ga_days_incl;GWG;w_age;m_muacincl	FALSE
Strongyloides stercoralis	1–2m	Pre+Postnatal	1.45507e-14			9.84029e-14	1	1		FALSE
Norovirus GII	1–2m	Pre+Postnatal	0.726732	-1.70595	3.84599	3.36608	0.566667	1	m_hbincl;w_age	FALSE
Cryptosporidium hominis	1–2m	Pre+Postnatal	14.0857			4	0.999722	1		FALSE
Astrovirus	1–2m	Pre+Postnatal	72.1257	-4689.52	4442.09	4	0.998794	1	primiparity;m_bmiincl;m_hbincl;ga_days_incl;GWG;m_heightincl;m_muacincl	FALSE
Oxacillinases	1–2m	Pre+Postnatal	-225.34	-3105.89	2655.21	-4	0.994911	1	primiparity;m_bmiincl;m_hbincl;ga_days_incl;GWG;w_age;m_heightincl;m_muacincl	FALSE
Sapovirus	1–2m	Pre+Postnatal	-19.1923		1131.53	-4	0.997205	1	m_hbincl	FALSE
Norovirus GII4	1–2m	Pre+Postnatal	18.7559	-1296.15		4	0.997591	1	primiparity	FALSE
Norovirus GI1	1–2m	Pre+Postnatal	1.45507e-14			9.84029e-14	1	1		FALSE
Cryptosporidium parvum	1–2m	Pre+Postnatal	1.45507e-14			9.84029e-14	1	1		FALSE
Necator americanus	1–2m	Pre+Postnatal	1.45507e-14			9.84029e-14	1	1		FALSE
Salmonella tetrathionate reductase gene	1–2m	Pre+Postnatal	-0.692328	-2.21142	0.669672	-3.20673	0.334079	1	primiparity;m_bmiincl;GWG;w_age;m_muacincl	FALSE
Salmonella invasion gene A	1–2m	Pre+Postnatal	-0.692328	-2.21142	0.669672	-3.20673	0.334079	1	primiparity;m_bmiincl;GWG;w_age;m_muacincl	FALSE
Plesiomonas shigelloides	1–2m	Prenatal	-8.35505e-15			-7.69201e-15	1	1		FALSE
Campylobacter concisus	1–2m	Prenatal	-17.6944		388.463	-4	0.995222	1		FALSE
Entamoeba pan	1–2m	Prenatal	-8.35505e-15			-7.69201e-15	1	1		FALSE
Shiga toxin producing E.coli stx1	1–2m	Prenatal	34.376	-11933.4		4	0.999527	1	primiparity;w_age	FALSE
Enteropathogene E.coli eae	1–2m	Prenatal	1.55135	-0.641226	4.65383	4	0.206127	1	m_bmiincl;m_heightincl;m_muacincl	FALSE
Enteroaggregative E.coli aatA	1–2m	Prenatal	0.188492	-0.784789	1.19653	0.873059	0.70692	1	primiparity;m_bmiincl;ga_days_incl;m_heightincl;m_muacincl	FALSE
Blastocystis hominis	1–2m	Prenatal	-8.35505e-15			-7.69201e-15	1	1		FALSE
Giardia lamblia	1–2m	Prenatal	-1.32528	-4.41287	0.784279	-4	0.274221	1	primiparity;m_bmiincl;m_heightincl;m_muacincl	FALSE
Cyclospora cayetanensis	1–2m	Prenatal	-8.35505e-15			-7.69201e-15	1	1		FALSE
Isospora belli	1–2m	Prenatal	-8.35505e-15			-7.69201e-15	1	1		FALSE
Cryptosporidium	1–2m	Prenatal	1.81971	-0.323137	4.87997	4	0.129263	1	primiparity;m_heightincl	FALSE
Clostridium difficile	1–2m	Prenatal	1534.58	-6619.3	9688.46	4	0.982685	1	m_bmiincl	FALSE
Mycobacterium tuberculosis	1–2m	Prenatal	-8.35505e-15			-7.69201e-15	1	1		FALSE
Sapovirus-I-II-IV	1–2m	Prenatal	-8.35505e-15			-7.69201e-15	1	1		FALSE
Enterotoxigenic E.coli coli surface 3	1–2m	Prenatal	-8.35505e-15			-7.69201e-15	1	1		FALSE
Ascaris lumbricoides	1–2m	Prenatal	-8.35505e-15			-7.69201e-15	1	1		FALSE
Enterocytozoon bieneusi	1–2m	Prenatal	-8.35505e-15			-7.69201e-15	1	1		FALSE
Encephalytozoon intestinalis	1–2m	Prenatal	-8.35505e-15			-7.69201e-15	1	1		FALSE
ShEgyrA83S	1–2m	Prenatal	-8.35505e-15			-7.69201e-15	1	1		FALSE
Enterotoxigenic E.coli coli surface 6	1–2m	Prenatal	-8.35505e-15			-7.69201e-15	1	1		FALSE
Enterotoxigenic E.coli coli surface 5	1–2m	Prenatal	-8.35505e-15			-7.69201e-15	1	1		FALSE
Enterotoxigenic E.coli colonization factor antigen I	1–2m	Prenatal	-8.35505e-15			-7.69201e-15	1	1		FALSE
Enterotoxigenic E.coli coli surface 1	1–2m	Prenatal	-8.35505e-15			-7.69201e-15	1	1		FALSE
Ancylostoma duodenale	1–2m	Prenatal	-8.35505e-15			-7.69201e-15	1	1		FALSE
Campylobacter_jejuni_coli	1–2m	Prenatal	-8.35505e-15			-7.69201e-15	1	1		FALSE
Vibrio cholerae	1–2m	Prenatal	-8.35505e-15			-7.69201e-15	1	1		FALSE
Helicobacter pylori	1–2m	Prenatal	-8.35505e-15			-7.69201e-15	1	1		FALSE
Campylobacter_pan	1–2m	Prenatal	-8.35505e-15			-7.69201e-15	1	1		FALSE
Shigella_flexneri_6	1–2m	Prenatal	-8.35505e-15			-7.69201e-15	1	1		FALSE
Enteroaggregative E.coli aggR	1–2m	Prenatal	0.0601254	-0.93382	1.08295	0.278489	0.906158	1	primiparity;m_bmiincl;ga_days_incl;GWG;m_heightincl;m_muacincl	FALSE
Bacteroides fragilis	1–2m	Prenatal	-0.816514	-2.80979	0.76095	-3.78194	0.346188	1	primiparity;m_bmiincl;m_muacincl	FALSE
Adenovirus serotypes 40 et 41	1–2m	Prenatal	-17.5587		1018.64	-4	0.997124	1		FALSE
Campylobacter troglodytis	1–2m	Prenatal	-0.127965	-1.56881	1.20178	-0.59271	0.852745	1	primiparity;ga_days_incl;m_heightincl;m_muacincl	FALSE
Shigella/Enteroinvasive E.coli	1–2m	Prenatal	-8.35505e-15			-7.69201e-15	1	1		FALSE
Campylobacter infans	1–2m	Prenatal	-0.0500689	-1.80886	1.55922	-0.23191	0.951889	1	primiparity;m_bmiincl;ga_days_incl;GWG;w_age;m_heightincl;m_muacincl	FALSE
Shiga toxin producing E.coli stx2	1–2m	Prenatal	-8.35505e-15			-7.69201e-15	1	1		FALSE
Enterotoxigenic E.coli thermolabile	1–2m	Prenatal	-0.276967	-2.37222	1.5303	-1.28286	0.769971	1	primiparity;m_bmiincl;ga_days_incl;m_heightincl;m_muacincl	FALSE
Shigella flexneri serotype 6	1–2m	Prenatal	-8.35505e-15			-7.69201e-15	1	1		FALSE
Shigella flexneri non serotype 6	1–2m	Prenatal	19.4585	-1059.53		4	0.996979	1	primiparity;m_bmiincl	FALSE
Hymenolepis nana	1–2m	Prenatal	-8.35505e-15			-7.69201e-15	1	1		FALSE
Campylobacter Pan	1–2m	Prenatal	0.402263	-0.968851	1.77104	1.8632	0.555323	1	primiparity;m_muacincl	FALSE
Enteropathogene E.coli bfpA	1–2m	Prenatal	19.1682	-514.302		4	0.996085	1		FALSE	FALSE	TRUE	0.353175
Epstein-Barr Virus	1–2m	Prenatal	-8.35505e-15			-7.69201e-15	1	1		FALSE
Enteroaggregative E.coli aaiC	1–2m	Prenatal	0.401904	-1.43755	2.23035	1.86154	0.654003	1	primiparity;m_bmiincl;ga_days_incl;w_age;m_muacincl	FALSE
Campylobacter jejuni/coli	1–2m	Prenatal	1.10823	-0.875686	3.37294	4	0.282939	1	primiparity;m_bmiincl;GWG	FALSE	FALSE	TRUE	0.491071
Campylobacter jejuni/coli	1–2m	Prenatal	1.10823	-0.875686	3.37294	4	0.282939	1	primiparity;m_bmiincl;GWG	FALSE	FALSE	TRUE	0.622768
Aeromonas	1–2m	Prenatal	14.6053	-3955.82	3985.03	4	0.999662	1	GWG	FALSE
Rotavirus	1–2m	Prenatal	-0.16222	-3.34695	2.40936	-0.751373	0.902381	1	primiparity;m_bmiincl;ga_days_incl;m_muacincl	FALSE
Enterotoxigenic E.coli thermostable	1–2m	Prenatal	-17.8812		718.921	-4	0.996826	1	m_hbincl;GWG	FALSE
Taenia solium	1–2m	Prenatal	-8.35505e-15			-7.69201e-15	1	1		FALSE
Norovirus GI	1–2m	Prenatal	-8.35505e-15			-7.69201e-15	1	1		FALSE
Schistosoma	1–2m	Prenatal	-8.35505e-15			-7.69201e-15	1	1		FALSE
Shigella sonnei serotype 1	1–2m	Prenatal	-8.35505e-15			-7.69201e-15	1	1		FALSE
Campylobacter upsaliensis	1–2m	Prenatal	-109.766	-2312.08	1984.05	-4	0.997009	1	primiparity;m_bmiincl;m_hbincl;GWG;w_age;m_heightincl;m_muacincl	FALSE
Strongyloides stercoralis	1–2m	Prenatal	-8.35505e-15			-7.69201e-15	1	1		FALSE
Norovirus GII	1–2m	Prenatal	-86.7848	-7376.67	7203.1	-4	0.998905	1	primiparity;ga_days_incl;w_age	FALSE
Cryptosporidium hominis	1–2m	Prenatal	-8.35505e-15			-7.69201e-15	1	1		FALSE
Astrovirus	1–2m	Prenatal	1.04028	-1.41025	4.15997	4	0.413212	1	m_hbincl;m_heightincl	FALSE
Oxacillinases	1–2m	Prenatal	-17.5587		1018.64	-4	0.997124	1		FALSE
Sapovirus	1–2m	Prenatal	-18.6208		1387.62	-4	0.997781	1	m_hbincl	FALSE
Norovirus GII4	1–2m	Prenatal	-8.35505e-15			-7.69201e-15	1	1		FALSE
Norovirus GI1	1–2m	Prenatal	-8.35505e-15			-7.69201e-15	1	1		FALSE
Cryptosporidium parvum	1–2m	Prenatal	-8.35505e-15			-7.69201e-15	1	1		FALSE
Necator americanus	1–2m	Prenatal	-8.35505e-15			-7.69201e-15	1	1		FALSE
Salmonella tetrathionate reductase gene	1–2m	Prenatal	-0.564858	-2.21593	0.861497	-2.61631	0.458035	1	primiparity;m_bmiincl;m_heightincl;m_muacincl	FALSE
Salmonella invasion gene A	1–2m	Prenatal	-0.564858	-2.21593	0.861497	-2.61631	0.458035	1	primiparity;m_bmiincl;m_heightincl;m_muacincl	FALSE
Plesiomonas shigelloides	1–2m	Postnatal	1.09044e-14			8.1514e-14	1	1		FALSE
Campylobacter concisus	1–2m	Postnatal	-0.770888	-3.31703	1.64407	-3.57061	0.523461	1	primiparity;m_bmiincl;ga_days_incl;GWG;m_heightincl;m_muacincl	FALSE
Entamoeba pan	1–2m	Postnatal	90.4473	-6561.4	20807.1	4	0.997437	1	primiparity;m_bmiincl;m_heightincl	FALSE
Shiga toxin producing E.coli stx1	1–2m	Postnatal	1.09044e-14			8.1514e-14	1	1		FALSE
Enteropathogene E.coli eae	1–2m	Postnatal	1.36713	-0.595472	4.36595	4	0.230876	1	ga_days_incl	FALSE
Enteroaggregative E.coli aatA	1–2m	Postnatal	-0.327573	-1.12145	0.448934	-1.51725	0.41144	1	m_hbincl;m_heightincl	FALSE
Blastocystis hominis	1–2m	Postnatal	1.09044e-14			8.1514e-14	1	1		FALSE
Giardia lamblia	1–2m	Postnatal	-0.0821418	-1.73038	1.5569	-0.380465	0.919521	1	primiparity;m_bmiincl;m_hbincl;ga_days_incl;GWG;w_age;m_heightincl;m_muacincl	FALSE
Cyclospora cayetanensis	1–2m	Postnatal	1.09044e-14			8.1514e-14	1	1		FALSE
Isospora belli	1–2m	Postnatal	1.09044e-14			8.1514e-14	1	1		FALSE
Cryptosporidium	1–2m	Postnatal	-0.425569	-4.24264	3.15288	-1.97115	0.800708	1	m_bmiincl;m_hbincl;ga_days_incl;GWG;w_age;m_heightincl;m_muacincl	FALSE
Clostridium difficile	1–2m	Postnatal	-224.19	-31039.1	8179.23	-4	0.996013	1	primiparity;m_bmiincl;m_hbincl;m_muacincl	FALSE
Mycobacterium tuberculosis	1–2m	Postnatal	1.09044e-14			8.1514e-14	1	1		FALSE
Sapovirus-I-II-IV	1–2m	Postnatal	1.09044e-14			8.1514e-14	1	1		FALSE
Enterotoxigenic E.coli coli surface 3	1–2m	Postnatal	1.09044e-14			8.1514e-14	1	1		FALSE
Ascaris lumbricoides	1–2m	Postnatal	1.09044e-14			8.1514e-14	1	1		FALSE
Enterocytozoon bieneusi	1–2m	Postnatal	1.09044e-14			8.1514e-14	1	1		FALSE
Encephalytozoon intestinalis	1–2m	Postnatal	1.09044e-14			8.1514e-14	1	1		FALSE
ShEgyrA83S	1–2m	Postnatal	1.09044e-14			8.1514e-14	1	1		FALSE
Enterotoxigenic E.coli coli surface 6	1–2m	Postnatal	1.09044e-14			8.1514e-14	1	1		FALSE
Enterotoxigenic E.coli coli surface 5	1–2m	Postnatal	1.09044e-14			8.1514e-14	1	1		FALSE
Enterotoxigenic E.coli colonization factor antigen I	1–2m	Postnatal	1.09044e-14			8.1514e-14	1	1		FALSE
Enterotoxigenic E.coli coli surface 1	1–2m	Postnatal	1.09044e-14			8.1514e-14	1	1		FALSE
Ancylostoma duodenale	1–2m	Postnatal	1.09044e-14			8.1514e-14	1	1		FALSE
Campylobacter_jejuni_coli	1–2m	Postnatal	1.09044e-14			8.1514e-14	1	1		FALSE
Vibrio cholerae	1–2m	Postnatal	1.09044e-14			8.1514e-14	1	1		FALSE
Helicobacter pylori	1–2m	Postnatal	1.09044e-14			8.1514e-14	1	1		FALSE
Campylobacter_pan	1–2m	Postnatal	1.09044e-14			8.1514e-14	1	1		FALSE
Shigella_flexneri_6	1–2m	Postnatal	1.09044e-14			8.1514e-14	1	1		FALSE
Enteroaggregative E.coli aggR	1–2m	Postnatal	-0.462473	-1.25994	0.312672	-2.14209	0.246797	1	m_hbincl	FALSE
Bacteroides fragilis	1–2m	Postnatal	-0.0118295	-1.31696	1.31644	-0.0547918	0.985645	1	m_bmiincl;m_hbincl;ga_days_incl;GWG;m_heightincl;m_muacincl	FALSE
Adenovirus serotypes 40 et 41	1–2m	Postnatal	-18.5108		1207.42	-4	0.997444	1	primiparity;w_age	FALSE
Campylobacter troglodytis	1–2m	Postnatal	-0.350629	-1.55975	0.831991	-1.62405	0.557868	1	ga_days_incl;m_heightincl	FALSE
Shigella/Enteroinvasive E.coli	1–2m	Postnatal	1.09044e-14			8.1514e-14	1	1		FALSE
Campylobacter infans	1–2m	Postnatal	-0.753794	-2.38617	0.709208	-3.49143	0.321498	1	m_heightincl;m_muacincl	FALSE
Shiga toxin producing E.coli stx2	1–2m	Postnatal	1.09044e-14			8.1514e-14	1	1		FALSE
Enterotoxigenic E.coli thermolabile	1–2m	Postnatal	0.59086	-0.652011	1.97844	2.73675	0.366168	1	w_age;m_muacincl	FALSE
Shigella flexneri serotype 6	1–2m	Postnatal	1.09044e-14			8.1514e-14	1	1		FALSE
Shigella flexneri non serotype 6	1–2m	Postnatal	1.09044e-14			8.1514e-14	1	1		FALSE
Hymenolepis nana	1–2m	Postnatal	1.09044e-14			8.1514e-14	1	1		FALSE
Campylobacter Pan	1–2m	Postnatal	1.03684	-0.0318017	2.25177	4	0.0698386	1	m_hbincl	FALSE
Enteropathogene E.coli bfpA	1–2m	Postnatal	1.09044e-14			8.1514e-14	1	1		FALSE	FALSE	TRUE	0.353175
Epstein-Barr Virus	1–2m	Postnatal	1.09044e-14			8.1514e-14	1	1		FALSE
Enteroaggregative E.coli aaiC	1–2m	Postnatal	0.910665	-0.770796	2.89319	4	0.314882	1	m_bmiincl;m_hbincl;ga_days_incl;w_age;m_muacincl	FALSE
Campylobacter jejuni/coli	1–2m	Postnatal	1.70781	0.296721	3.62796	4	0.0347822	1	m_hbincl	TRUE	FALSE	TRUE	0.491071
Campylobacter jejuni/coli	1–2m	Postnatal	1.70781	0.296721	3.62796	4	0.0347822	1	m_hbincl	TRUE	FALSE	TRUE	0.622768
Aeromonas	1–2m	Postnatal	-9.66693	-3739.07	3719.73	-4	0.999762	1	primiparity;GWG;w_age	FALSE
Rotavirus	1–2m	Postnatal	-0.710807	-3.81822	1.71333	-3.29232	0.57269	1	m_hbincl;GWG	FALSE
Enterotoxigenic E.coli thermostable	1–2m	Postnatal	-18.2702		590.229	-4	0.996011	1		FALSE
Taenia solium	1–2m	Postnatal	1.09044e-14			8.1514e-14	1	1		FALSE
Norovirus GI	1–2m	Postnatal	18.1321	-633.673		4	0.996296	1		FALSE
Schistosoma	1–2m	Postnatal	1.09044e-14			8.1514e-14	1	1		FALSE
Shigella sonnei serotype 1	1–2m	Postnatal	1.09044e-14			8.1514e-14	1	1		FALSE
Campylobacter upsaliensis	1–2m	Postnatal	-0.783541	-3.96121	1.70803	-3.62921	0.547723	1	m_hbincl;GWG;w_age	FALSE
Strongyloides stercoralis	1–2m	Postnatal	1.09044e-14			8.1514e-14	1	1		FALSE
Norovirus GII	1–2m	Postnatal	1.44908	-0.534232	4.46448	4	0.20898	1	m_hbincl	FALSE
Cryptosporidium hominis	1–2m	Postnatal	11.2565	-5912.01	5934.53	4	0.999825	1	primiparity;ga_days_incl;GWG;m_heightincl	FALSE
Astrovirus	1–2m	Postnatal	0.604073	-1.92178	3.82636	2.79795	0.648047	1	m_hbincl;ga_days_incl;m_heightincl	FALSE
Oxacillinases	1–2m	Postnatal	-18.615		1050.67	-4	0.997075	1	primiparity;m_bmiincl;m_hbincl	FALSE
Sapovirus	1–2m	Postnatal	-101.9	-3656.15	3452.35	-4	0.997362	1	primiparity;m_hbincl;w_age;m_heightincl;m_muacincl	FALSE
Norovirus GII4	1–2m	Postnatal	1.09044e-14			8.1514e-14	1	1		FALSE
Norovirus GI1	1–2m	Postnatal	1.09044e-14			8.1514e-14	1	1		FALSE
Cryptosporidium parvum	1–2m	Postnatal	1.09044e-14			8.1514e-14	1	1		FALSE
Necator americanus	1–2m	Postnatal	1.09044e-14			8.1514e-14	1	1		FALSE
Salmonella tetrathionate reductase gene	1–2m	Postnatal	-0.486182	-1.76394	0.725475	-2.2519	0.433619	1	m_heightincl	FALSE
Salmonella invasion gene A	1–2m	Postnatal	-0.722665	-2.11602	0.542546	-3.34724	0.27354	1	m_heightincl	FALSE
Plesiomonas shigelloides	5–6m	Pre+Postnatal	-0.473534	-3.27874	2.01221	-2.19332	0.709797	1	primiparity;m_hbincl;GWG;w_age;m_heightincl	FALSE
Campylobacter concisus	5–6m	Pre+Postnatal	-0.397327	-1.2267	0.413027	-1.84034	0.339563	1	primiparity;m_hbincl;ga_days_incl;w_age;m_muacincl	FALSE	FALSE	TRUE	0.67619
Entamoeba pan	5–6m	Pre+Postnatal	-19.7643		1834.61	-4	0.998218	1	primiparity	FALSE
Shiga toxin producing E.coli stx1	5–6m	Pre+Postnatal	18.6393	-483.972		4	0.99593	1		FALSE
Enteropathogene E.coli eae	5–6m	Pre+Postnatal	0.233352	-0.706356	1.18783	1.08084	0.626283	1	primiparity;m_bmiincl;m_hbincl;ga_days_incl;GWG;w_age;m_heightincl;m_muacincl	FALSE
Enteroaggregative E.coli aatA	5–6m	Pre+Postnatal	0.721719	-0.159362	1.65098	3.34287	0.115257	1	primiparity;m_hbincl;w_age;m_muacincl	FALSE
Blastocystis hominis	5–6m	Pre+Postnatal	6.44452e-15			6.08568e-14	1	1		FALSE
Giardia lamblia	5–6m	Pre+Postnatal	0.215898	-0.976434	1.42463	1	0.72003	1	primiparity;m_bmiincl;m_hbincl;ga_days_incl;GWG;w_age;m_heightincl;m_muacincl	FALSE
Cyclospora cayetanensis	5–6m	Pre+Postnatal	6.44452e-15			6.08568e-14	1	1		FALSE
Isospora belli	5–6m	Pre+Postnatal	6.44452e-15			6.08568e-14	1	1		FALSE
Cryptosporidium	5–6m	Pre+Postnatal	-0.430323	-1.9736	1.02175	-1.99317	0.564038	1	primiparity;m_hbincl;w_age;m_heightincl;m_muacincl	FALSE
Clostridium difficile	5–6m	Pre+Postnatal	1.22206	-0.949573	4.2999	4	0.313023	1	m_bmiincl;m_hbincl;m_muacincl	FALSE
Mycobacterium tuberculosis	5–6m	Pre+Postnatal	6.44452e-15			6.08568e-14	1	1		FALSE
Sapovirus-I-II-IV	5–6m	Pre+Postnatal	6.44452e-15			6.08568e-14	1	1		FALSE
Enterotoxigenic E.coli coli surface 3	5–6m	Pre+Postnatal	6.44452e-15			6.08568e-14	1	1		FALSE
Ascaris lumbricoides	5–6m	Pre+Postnatal	6.44452e-15			6.08568e-14	1	1		FALSE
Enterocytozoon bieneusi	5–6m	Pre+Postnatal	-1.27124	-4.52518	1.0322	-4	0.32292	1	primiparity;ga_days_incl;GWG;w_age;m_heightincl	FALSE
Encephalytozoon intestinalis	5–6m	Pre+Postnatal	6.44452e-15			6.08568e-14	1	1		FALSE
ShEgyrA83S	5–6m	Pre+Postnatal	6.44452e-15			6.08568e-14	1	1		FALSE
Enterotoxigenic E.coli coli surface 6	5–6m	Pre+Postnatal	6.44452e-15			6.08568e-14	1	1		FALSE
Enterotoxigenic E.coli coli surface 5	5–6m	Pre+Postnatal	6.44452e-15			6.08568e-14	1	1		FALSE
Enterotoxigenic E.coli colonization factor antigen I	5–6m	Pre+Postnatal	6.44452e-15			6.08568e-14	1	1		FALSE
Enterotoxigenic E.coli coli surface 1	5–6m	Pre+Postnatal	6.44452e-15			6.08568e-14	1	1		FALSE
Ancylostoma duodenale	5–6m	Pre+Postnatal	6.44452e-15			6.08568e-14	1	1		FALSE
Campylobacter_jejuni_coli	5–6m	Pre+Postnatal	6.44452e-15			6.08568e-14	1	1		FALSE
Vibrio cholerae	5–6m	Pre+Postnatal	6.44452e-15			6.08568e-14	1	1		FALSE
Helicobacter pylori	5–6m	Pre+Postnatal	0.217058	-1.6087	2.02911	1.00537	0.808254	1	primiparity;m_bmiincl;m_hbincl;ga_days_incl;GWG;w_age;m_heightincl;m_muacincl	FALSE
Campylobacter_pan	5–6m	Pre+Postnatal	6.44452e-15			6.08568e-14	1	1		FALSE
Shigella_flexneri_6	5–6m	Pre+Postnatal	6.44452e-15			6.08568e-14	1	1		FALSE
Enteroaggregative E.coli aggR	5–6m	Pre+Postnatal	0.718309	-0.220679	1.70331	3.32707	0.140257	1	primiparity;m_hbincl;GWG;w_age;m_heightincl;m_muacincl	FALSE	FALSE	TRUE	0.612245
Bacteroides fragilis	5–6m	Pre+Postnatal	1.16457	-0.0042723	2.47215	4	0.0604812	1	w_age;m_muacincl	FALSE	FALSE	TRUE	0.607143
Adenovirus serotypes 40 et 41	5–6m	Pre+Postnatal	-0.744993	-3.91218	1.73638	-3.45067	0.567134	1	primiparity;m_bmiincl;m_hbincl;GWG;m_heightincl;m_muacincl	FALSE
Campylobacter troglodytis	5–6m	Pre+Postnatal	-1.35689	-3.51744	0.401853	-4	0.156999	1	primiparity;m_bmiincl;GWG;w_age;m_heightincl;m_muacincl	FALSE
Shigella/Enteroinvasive E.coli	5–6m	Pre+Postnatal	6.44452e-15			6.08568e-14	1	1		FALSE
Campylobacter infans	5–6m	Pre+Postnatal	-0.177633	-5.5045	5.03625	-0.822764	0.9386	1	primiparity;m_bmiincl;m_hbincl;ga_days_incl;GWG;w_age;m_heightincl;m_muacincl	FALSE
Shiga toxin producing E.coli stx2	5–6m	Pre+Postnatal	18.2162	-590.755		4	0.996022	1		FALSE
Enterotoxigenic E.coli thermolabile	5–6m	Pre+Postnatal	0.541121	-0.556089	1.69513	2.50637	0.339666	1	primiparity;m_bmiincl;m_hbincl;ga_days_incl;GWG;w_age;m_heightincl;m_muacincl	FALSE
Shigella flexneri serotype 6	5–6m	Pre+Postnatal	18.2162	-590.755		4	0.996022	1		FALSE
Shigella flexneri non serotype 6	5–6m	Pre+Postnatal	-0.312767	-2.77652	2.09439	-1.44868	0.788793	1	primiparity;m_bmiincl;ga_days_incl;GWG;w_age;m_heightincl;m_muacincl	FALSE
Hymenolepis nana	5–6m	Pre+Postnatal	6.44452e-15			6.08568e-14	1	1		FALSE
Campylobacter Pan	5–6m	Pre+Postnatal	-0.0927801	-0.904105	0.708757	-0.42974	0.820742	1	primiparity;m_bmiincl;m_hbincl;ga_days_incl;GWG;w_age;m_heightincl;m_muacincl	FALSE
Enteropathogene E.coli bfpA	5–6m	Pre+Postnatal	0.547274	-1.15476	2.41382	2.53487	0.5353	1	primiparity;m_bmiincl;m_hbincl;w_age;m_heightincl;m_muacincl	FALSE
Epstein-Barr Virus	5–6m	Pre+Postnatal	20.5277	-1472.7		4	0.997706	1	primiparity;m_heightincl	FALSE
Enteroaggregative E.coli aaiC	5–6m	Pre+Postnatal	-0.419596	-1.60939	0.720265	-1.94349	0.473871	1	primiparity;m_bmiincl;m_hbincl;ga_days_incl;GWG;w_age;m_heightincl;m_muacincl	FALSE
Campylobacter jejuni/coli	5–6m	Pre+Postnatal	-0.123902	-0.947816	0.692369	-0.573892	0.765906	1	primiparity;m_bmiincl;m_hbincl;ga_days_incl;GWG;w_age;m_heightincl;m_muacincl	FALSE
Aeromonas	5–6m	Pre+Postnatal	-127.409	-1354.88	1100.06	-4	0.993247	1	primiparity;m_bmiincl;m_hbincl;ga_days_incl;GWG;w_age;m_heightincl;m_muacincl	FALSE
Rotavirus	5–6m	Pre+Postnatal	-1.32614	-4.4233	0.873261	-4	0.28015	1	primiparity;m_hbincl;GWG;m_heightincl	FALSE
Enterotoxigenic E.coli thermostable	5–6m	Pre+Postnatal	19.772	-342.746		4	0.994805	1	primiparity;m_bmiincl;m_hbincl;ga_days_incl;GWG;w_age;m_heightincl;m_muacincl	FALSE
Taenia solium	5–6m	Pre+Postnatal	6.44452e-15			6.08568e-14	1	1		FALSE
Norovirus GI	5–6m	Pre+Postnatal	0.348516	-2.40022	3.58141	1.61426	0.799295	1	primiparity;m_bmiincl;m_hbincl;ga_days_incl;GWG;w_age;m_heightincl;m_muacincl	FALSE
Schistosoma	5–6m	Pre+Postnatal	6.44452e-15			6.08568e-14	1	1		FALSE
Shigella sonnei serotype 1	5–6m	Pre+Postnatal	6.44452e-15			6.08568e-14	1	1		FALSE
Campylobacter upsaliensis	5–6m	Pre+Postnatal	-18.1321		616.886	-4	0.996199	1		FALSE
Strongyloides stercoralis	5–6m	Pre+Postnatal	6.44452e-15			6.08568e-14	1	1		FALSE
Norovirus GII	5–6m	Pre+Postnatal	-0.260591	-1.47716	0.923905	-1.20701	0.665839	1	primiparity;m_bmiincl;m_hbincl;ga_days_incl;GWG;w_age;m_heightincl	FALSE
Cryptosporidium hominis	5–6m	Pre+Postnatal	-18.1321		616.886	-4	0.996199	1		FALSE
Astrovirus	5–6m	Pre+Postnatal	18.2162	-590.755		4	0.996022	1		FALSE
Oxacillinases	5–6m	Pre+Postnatal	-18.6229		858.311	-4	0.997265	1	m_hbincl	FALSE
Sapovirus	5–6m	Pre+Postnatal	0.825154	-0.462367	2.21129	3.82196	0.216866	1	primiparity;m_bmiincl;w_age;m_heightincl;m_muacincl	FALSE	FALSE	TRUE	0.607143
Norovirus GII4	5–6m	Pre+Postnatal	-0.979166	-3.15828	0.872928	-4	0.32394	1	primiparity;m_bmiincl;m_hbincl;w_age;m_heightincl;m_muacincl	FALSE
Norovirus GI1	5–6m	Pre+Postnatal	33.586	-10537.6	9735.21	4	0.999747	1	primiparity;m_bmiincl;ga_days_incl;w_age;m_muacincl	FALSE
Cryptosporidium parvum	5–6m	Pre+Postnatal	51.3974	-7800.93	7903.72	4	0.999398	1	primiparity;m_bmiincl;GWG;w_age;m_heightincl	FALSE
Necator americanus	5–6m	Pre+Postnatal	6.44452e-15			6.08568e-14	1	1		FALSE
Salmonella tetrathionate reductase gene	5–6m	Pre+Postnatal	0.318979	-0.876798	1.5339	1.47745	0.597902	1	primiparity;m_bmiincl;ga_days_incl;GWG;w_age;m_heightincl;m_muacincl	FALSE	FALSE	TRUE	0.67619
Salmonella invasion gene A	5–6m	Pre+Postnatal	-0.0191582	-1.61891	1.59626	-0.0887369	0.980807	1	primiparity;m_bmiincl;m_hbincl;ga_days_incl;GWG;w_age;m_heightincl;m_muacincl	FALSE	FALSE	TRUE	0.67619
Plesiomonas shigelloides	5–6m	Prenatal	0.297115	-1.74685	2.33784	1.37618	0.766153	1	primiparity;m_hbincl;ga_days_incl;GWG;m_heightincl;m_muacincl	FALSE
Campylobacter concisus	5–6m	Prenatal	-0.625717	-1.55179	0.25471	-2.8982	0.171075	1	primiparity;m_bmiincl;m_heightincl;m_muacincl	FALSE	FALSE	TRUE	0.67619
Entamoeba pan	5–6m	Prenatal	-19.745		1992.08	-4	0.998359	1	primiparity	FALSE
Shiga toxin producing E.coli stx1	5–6m	Prenatal	-6.69436e-15			0	1	1		FALSE
Enteropathogene E.coli eae	5–6m	Prenatal	0.444278	-0.471498	1.3711	2.05781	0.34115	1	primiparity;m_bmiincl;m_hbincl;GWG;m_muacincl	FALSE
Enteroaggregative E.coli aatA	5–6m	Prenatal	0.966092	0.0307146	1.97928	4	0.0500024	0.578505	primiparity;GWG	FALSE
Blastocystis hominis	5–6m	Prenatal	-6.69436e-15			0	1	1		FALSE
Giardia lamblia	5–6m	Prenatal	-0.111231	-1.36843	1.10496	-0.515199	0.857643	1	primiparity;m_bmiincl;m_hbincl;ga_days_incl;GWG;m_heightincl;m_muacincl	FALSE
Cyclospora cayetanensis	5–6m	Prenatal	1179.15	-14228.3	66805.9	4	0.989293	1	primiparity;m_bmiincl;ga_days_incl	FALSE
Isospora belli	5–6m	Prenatal	42.314	-6127.25	5704.38	4	0.999454	1	primiparity;m_bmiincl;m_hbincl;ga_days_incl	FALSE
Cryptosporidium	5–6m	Prenatal	-0.735413	-2.52174	0.868292	-3.40629	0.382251	1	primiparity;m_bmiincl;m_hbincl;ga_days_incl;GWG;w_age;m_heightincl;m_muacincl	FALSE
Clostridium difficile	5–6m	Prenatal	-18.7824		1161.41	-4	0.997324	1	m_heightincl	FALSE
Mycobacterium tuberculosis	5–6m	Prenatal	-6.69436e-15			0	1	1		FALSE
Sapovirus-I-II-IV	5–6m	Prenatal	-6.69436e-15			0	1	1		FALSE
Enterotoxigenic E.coli coli surface 3	5–6m	Prenatal	-6.69436e-15			0	1	1		FALSE
Ascaris lumbricoides	5–6m	Prenatal	-6.69436e-15			0	1	1		FALSE
Enterocytozoon bieneusi	5–6m	Prenatal	-0.430148	-3.49753	1.79209	-1.99236	0.72323	1	primiparity;m_hbincl;GWG	FALSE
Encephalytozoon intestinalis	5–6m	Prenatal	-6.69436e-15			0	1	1		FALSE
ShEgyrA83S	5–6m	Prenatal	-6.69436e-15			0	1	1		FALSE
Enterotoxigenic E.coli coli surface 6	5–6m	Prenatal	-6.69436e-15			0	1	1		FALSE
Enterotoxigenic E.coli coli surface 5	5–6m	Prenatal	-6.69436e-15			0	1	1		FALSE
Enterotoxigenic E.coli colonization factor antigen I	5–6m	Prenatal	-6.69436e-15			0	1	1		FALSE
Enterotoxigenic E.coli coli surface 1	5–6m	Prenatal	-6.69436e-15			0	1	1		FALSE
Ancylostoma duodenale	5–6m	Prenatal	-6.69436e-15			0	1	1		FALSE
Campylobacter_jejuni_coli	5–6m	Prenatal	-6.69436e-15			0	1	1		FALSE
Vibrio cholerae	5–6m	Prenatal	-6.69436e-15			0	1	1		FALSE
Helicobacter pylori	5–6m	Prenatal	-0.272808	-2.13382	1.45968	-1.26359	0.757678	1	primiparity;m_bmiincl;m_hbincl;ga_days_incl;GWG;w_age;m_heightincl;m_muacincl	FALSE
Campylobacter_pan	5–6m	Prenatal	-6.69436e-15			0	1	1		FALSE
Shigella_flexneri_6	5–6m	Prenatal	-6.69436e-15			0	1	1		FALSE
Enteroaggregative E.coli aggR	5–6m	Prenatal	1.26941	0.261731	2.39333	4	0.0183023	0.39655	primiparity;GWG	TRUE	FALSE	TRUE	0.612245
Bacteroides fragilis	5–6m	Prenatal	-0.896224	-2.93522	0.772336	-4	0.320162	1	primiparity;m_bmiincl;GWG;w_age;m_muacincl	FALSE	FALSE	TRUE	0.607143
Adenovirus serotypes 40 et 41	5–6m	Prenatal	-1.30683	-4.04421	0.887902	-4	0.273425	1	primiparity;m_bmiincl;m_hbincl;ga_days_incl;GWG;w_age;m_heightincl;m_muacincl	FALSE
Campylobacter troglodytis	5–6m	Prenatal	-1.7765	-4.95988	0.437368	-4	0.16455	1	primiparity;m_bmiincl;m_hbincl;GWG;w_age;m_muacincl	FALSE
Shigella/Enteroinvasive E.coli	5–6m	Prenatal	-6.69436e-15			0	1	1		FALSE
Campylobacter infans	5–6m	Prenatal	2.31387	-0.646545	6.40479	4	0.170779	1	primiparity;m_bmiincl;ga_days_incl;GWG;w_age;m_muacincl	FALSE
Shiga toxin producing E.coli stx2	5–6m	Prenatal	18.8397	-1139.3		4	0.997269	1	primiparity;m_hbincl;GWG;w_age	FALSE
Enterotoxigenic E.coli thermolabile	5–6m	Prenatal	-0.983892	-2.67847	0.451558	-4	0.204498	1	primiparity;m_bmiincl;ga_days_incl;GWG;w_age;m_heightincl;m_muacincl	FALSE
Shigella flexneri serotype 6	5–6m	Prenatal	-6.69436e-15			0	1	1		FALSE
Shigella flexneri non serotype 6	5–6m	Prenatal	-1989.27	-38027.2	6994.55	-4	0.972567	1	primiparity;m_bmiincl;m_hbincl;ga_days_incl;GWG;w_age;m_heightincl;m_muacincl	FALSE
Hymenolepis nana	5–6m	Prenatal	-6.69436e-15			0	1	1		FALSE
Campylobacter Pan	5–6m	Prenatal	-0.903402	-1.85759	-0.0106348	-4	0.0534004	0.578505	primiparity;m_bmiincl;ga_days_incl;GWG;w_age;m_heightincl;m_muacincl	FALSE
Enteropathogene E.coli bfpA	5–6m	Prenatal	0.41712	-1.19836	2.12697	1.93202	0.609501	1	primiparity;m_bmiincl;GWG;m_muacincl	FALSE
Epstein-Barr Virus	5–6m	Prenatal	193.524	-17422.7	16360.7	4	0.999125	1	primiparity;m_bmiincl;ga_days_incl;GWG;m_muacincl	FALSE
Enteroaggregative E.coli aaiC	5–6m	Prenatal	0.370108	-0.716833	1.46921	1.71427	0.501525	1	primiparity;m_bmiincl;GWG;w_age;m_muacincl	FALSE
Campylobacter jejuni/coli	5–6m	Prenatal	-0.950063	-1.94158	-0.0329362	-4	0.0490307	0.578505	primiparity;GWG;m_heightincl	TRUE
Aeromonas	5–6m	Prenatal	-44.9118	-2953.07	3123.9	-4	0.998871	1	primiparity;ga_days_incl;w_age	FALSE
Rotavirus	5–6m	Prenatal	-18.8848		502.651	-4	0.996057	1	primiparity	FALSE
Enterotoxigenic E.coli thermostable	5–6m	Prenatal	-6.69436e-15			0	1	1		FALSE
Taenia solium	5–6m	Prenatal	-6.69436e-15			0	1	1		FALSE
Norovirus GI	5–6m	Prenatal	2.02878	-0.282635	5.28985	4	0.121725	1	primiparity;m_bmiincl;m_hbincl;ga_days_incl;GWG;w_age;m_heightincl;m_muacincl	FALSE
Schistosoma	5–6m	Prenatal	-6.69436e-15			0	1	1		FALSE
Shigella sonnei serotype 1	5–6m	Prenatal	-6.69436e-15			0	1	1		FALSE
Campylobacter upsaliensis	5–6m	Prenatal	-18.1321		671.674	-4	0.9965	1		FALSE
Strongyloides stercoralis	5–6m	Prenatal	-6.69436e-15			0	1	1		FALSE
Norovirus GII	5–6m	Prenatal	0.624089	-0.388179	1.67161	2.89066	0.229597	1	primiparity;GWG	FALSE
Cryptosporidium hominis	5–6m	Prenatal	-18.1321		671.674	-4	0.9965	1		FALSE
Astrovirus	5–6m	Prenatal	-6.69436e-15			0	1	1		FALSE
Oxacillinases	5–6m	Prenatal	-0.309926	-4.94005	3.56494	-1.43552	0.868975	1	primiparity;m_bmiincl;m_hbincl;GWG;w_age;m_heightincl;m_muacincl	FALSE
Sapovirus	5–6m	Prenatal	0.469912	-1.11484	2.09187	2.17654	0.554109	1	primiparity;m_bmiincl;m_hbincl;ga_days_incl;GWG;w_age;m_heightincl;m_muacincl	FALSE	FALSE	TRUE	0.607143
Norovirus GII4	5–6m	Prenatal	-1.03788	-3.10932	0.659174	-4	0.258582	1	primiparity;m_bmiincl;GWG;w_age;m_muacincl	FALSE
Norovirus GI1	5–6m	Prenatal	18.388	-589.09		4	0.995985	1		FALSE
Cryptosporidium parvum	5–6m	Prenatal	-6.69436e-15			0	1	1		FALSE
Necator americanus	5–6m	Prenatal	-6.69436e-15			0	1	1		FALSE
Salmonella tetrathionate reductase gene	5–6m	Prenatal	1.2792	0.311213	2.33377	4	0.0120933	0.393031	m_muacincl	TRUE	FALSE	TRUE	0.67619
Salmonella invasion gene A	5–6m	Prenatal	1.46012	0.395423	2.66999	4	0.0103912	0.393031	m_muacincl	TRUE	FALSE	TRUE	0.67619
Plesiomonas shigelloides	5–6m	Postnatal	0.707616	-1.00223	2.67837	3.27754	0.431911	1	m_bmiincl;m_hbincl;ga_days_incl;w_age;m_heightincl;m_muacincl	FALSE
Campylobacter concisus	5–6m	Postnatal	-1.06635	-1.91995	-0.260759	-4	0.0111573	0.241741		TRUE	FALSE	TRUE	0.67619
Entamoeba pan	5–6m	Postnatal	-19.4139		1631.32	-4	0.998034	1	primiparity	FALSE
Shiga toxin producing E.coli stx1	5–6m	Postnatal	19.5399	-1525.46		4	0.997881	1	primiparity;m_heightincl	FALSE
Enteropathogene E.coli eae	5–6m	Postnatal	-0.0439823	-0.948163	0.865969	-0.203718	0.923666	1	m_bmiincl;m_hbincl;ga_days_incl;GWG;w_age;m_heightincl;m_muacincl	FALSE
Enteroaggregative E.coli aatA	5–6m	Postnatal	1.22971	0.335998	2.19794	4	0.00899926	0.241741	w_age;m_heightincl	TRUE
Blastocystis hominis	5–6m	Postnatal	-1.05681e-14			-1.79425e-14	1	1		FALSE
Giardia lamblia	5–6m	Postnatal	0.00289212	-1.06511	1.07885	0.0133958	0.995725	1	primiparity;m_bmiincl;m_hbincl;w_age;m_heightincl;m_muacincl	FALSE
Cyclospora cayetanensis	5–6m	Postnatal	-1.05681e-14			-1.79425e-14	1	1		FALSE
Isospora belli	5–6m	Postnatal	-1.05681e-14			-1.79425e-14	1	1		FALSE
Cryptosporidium	5–6m	Postnatal	0.326212	-0.968686	1.69636	1.51095	0.624673	1	primiparity;m_bmiincl;m_hbincl;ga_days_incl;GWG;w_age;m_heightincl;m_muacincl	FALSE
Clostridium difficile	5–6m	Postnatal	1.15716	-1.39346	4.4039	4	0.390784	1	primiparity;m_hbincl;ga_days_incl;m_heightincl	FALSE
Mycobacterium tuberculosis	5–6m	Postnatal	-1.05681e-14			-1.79425e-14	1	1		FALSE
Sapovirus-I-II-IV	5–6m	Postnatal	-1.05681e-14			-1.79425e-14	1	1		FALSE
Enterotoxigenic E.coli coli surface 3	5–6m	Postnatal	-1.05681e-14			-1.79425e-14	1	1		FALSE
Ascaris lumbricoides	5–6m	Postnatal	-1.05681e-14			-1.79425e-14	1	1		FALSE
Enterocytozoon bieneusi	5–6m	Postnatal	-0.641124	-2.74774	1.32199	-2.96956	0.521199	1	primiparity;m_bmiincl;m_hbincl;ga_days_incl;GWG;w_age;m_heightincl;m_muacincl	FALSE
Encephalytozoon intestinalis	5–6m	Postnatal	35.9616	-2644.66	2956.86	4	0.99902	1	primiparity;m_heightincl	FALSE
ShEgyrA83S	5–6m	Postnatal	-1.05681e-14			-1.79425e-14	1	1		FALSE
Enterotoxigenic E.coli coli surface 6	5–6m	Postnatal	-1.05681e-14			-1.79425e-14	1	1		FALSE
Enterotoxigenic E.coli coli surface 5	5–6m	Postnatal	-1.05681e-14			-1.79425e-14	1	1		FALSE
Enterotoxigenic E.coli colonization factor antigen I	5–6m	Postnatal	-1.05681e-14			-1.79425e-14	1	1		FALSE
Enterotoxigenic E.coli coli surface 1	5–6m	Postnatal	-1.05681e-14			-1.79425e-14	1	1		FALSE
Ancylostoma duodenale	5–6m	Postnatal	-1.05681e-14			-1.79425e-14	1	1		FALSE
Campylobacter_jejuni_coli	5–6m	Postnatal	-1.05681e-14			-1.79425e-14	1	1		FALSE
Vibrio cholerae	5–6m	Postnatal	-1.05681e-14			-1.79425e-14	1	1		FALSE
Helicobacter pylori	5–6m	Postnatal	-1.35651	-4.35911	0.629782	-4	0.236768	1	m_heightincl	FALSE
Campylobacter_pan	5–6m	Postnatal	-1.05681e-14			-1.79425e-14	1	1		FALSE
Shigella_flexneri_6	5–6m	Postnatal	-1.05681e-14			-1.79425e-14	1	1		FALSE
Enteroaggregative E.coli aggR	5–6m	Postnatal	1.61779	0.630411	2.72388	4	0.00220278	0.143181	w_age;m_heightincl	TRUE	FALSE	TRUE	0.612245
Bacteroides fragilis	5–6m	Postnatal	1.04671	0.0173058	2.22751	4	0.0583073	0.757995		FALSE	FALSE	TRUE	0.607143
Adenovirus serotypes 40 et 41	5–6m	Postnatal	-0.280354	-2.1027	1.50462	-1.29855	0.750189	1	primiparity;m_bmiincl;m_hbincl;GWG;w_age;m_heightincl;m_muacincl	FALSE
Campylobacter troglodytis	5–6m	Postnatal	-0.162606	-1.50545	1.19669	-0.753162	0.809199	1	primiparity;m_bmiincl;ga_days_incl;GWG;w_age;m_heightincl;m_muacincl	FALSE
Shigella/Enteroinvasive E.coli	5–6m	Postnatal	-1.05681e-14			-1.79425e-14	1	1		FALSE
Campylobacter infans	5–6m	Postnatal	1.0348	-0.991409	4.05248	4	0.372887	1	m_bmiincl;w_age;m_muacincl	FALSE
Shiga toxin producing E.coli stx2	5–6m	Postnatal	17.9891	-1153.94		4	0.997412	1	primiparity;ga_days_incl;GWG	FALSE
Enterotoxigenic E.coli thermolabile	5–6m	Postnatal	-0.572649	-1.9534	0.719676	-2.6524	0.392263	1	primiparity;m_bmiincl;m_hbincl;ga_days_incl;GWG;w_age;m_heightincl;m_muacincl	FALSE
Shigella flexneri serotype 6	5–6m	Postnatal	-1.05681e-14			-1.79425e-14	1	1		FALSE
Shigella flexneri non serotype 6	5–6m	Postnatal	-1.16388	-4.20454	1.50787	-4	0.394443	1	primiparity;m_bmiincl;ga_days_incl;GWG;w_age;m_heightincl;m_muacincl	FALSE
Hymenolepis nana	5–6m	Postnatal	-1.05681e-14			-1.79425e-14	1	1		FALSE
Campylobacter Pan	5–6m	Postnatal	-0.708858	-1.50366	0.0635085	-3.28329	0.0746883	0.809123	ga_days_incl;w_age	FALSE
Enteropathogene E.coli bfpA	5–6m	Postnatal	0.796665	-0.760121	2.54754	3.69	0.32989	1	w_age;m_heightincl;m_muacincl	FALSE
Epstein-Barr Virus	5–6m	Postnatal	-1.05681e-14			-1.79425e-14	1	1		FALSE
Enteroaggregative E.coli aaiC	5–6m	Postnatal	0.0188695	-0.969636	1.0254	0.0874001	0.970086	1	m_bmiincl;m_hbincl;ga_days_incl;GWG;w_age;m_heightincl;m_muacincl	FALSE
Campylobacter jejuni/coli	5–6m	Postnatal	-0.834834	-1.68367	-0.0212085	-3.86679	0.0474903	0.757995	ga_days_incl;w_age	TRUE
Aeromonas	5–6m	Postnatal	-1717.62	-17082.2	1704.94	-4	0.937895	1	primiparity;m_bmiincl;m_hbincl;ga_days_incl;GWG;w_age;m_muacincl	FALSE
Rotavirus	5–6m	Postnatal	-18.5538		455.874	-4	0.995703	1		FALSE
Enterotoxigenic E.coli thermostable	5–6m	Postnatal	647.606	-3543.38	5440.39	4	0.990246	1	primiparity;m_bmiincl;m_hbincl;ga_days_incl;GWG;w_age;m_heightincl;m_muacincl	FALSE
Taenia solium	5–6m	Postnatal	-1.05681e-14			-1.79425e-14	1	1		FALSE
Norovirus GI	5–6m	Postnatal	1.44743	-0.706274	4.57224	4	0.239719	1	primiparity;m_bmiincl;m_hbincl;ga_days_incl;GWG;w_age;m_heightincl;m_muacincl	FALSE
Schistosoma	5–6m	Postnatal	-1.05681e-14			-1.79425e-14	1	1		FALSE
Shigella sonnei serotype 1	5–6m	Postnatal	-1.05681e-14			-1.79425e-14	1	1		FALSE
Campylobacter upsaliensis	5–6m	Postnatal	-0.986839	-4.30056	1.58263	-4	0.465831	1	primiparity;m_bmiincl;m_hbincl;ga_days_incl;w_age;m_muacincl	FALSE
Strongyloides stercoralis	5–6m	Postnatal	-1.05681e-14			-1.79425e-14	1	1		FALSE
Norovirus GII	5–6m	Postnatal	0.40953	-0.57784	1.44929	1.89686	0.422804	1	primiparity;m_bmiincl;GWG;m_heightincl	FALSE
Cryptosporidium hominis	5–6m	Postnatal	0.490596	-1.69166	2.97578	2.27235	0.662973	1	primiparity;m_bmiincl;m_hbincl;ga_days_incl;GWG;w_age;m_muacincl	FALSE
Astrovirus	5–6m	Postnatal	18.4306	-485.639		4	0.995976	1		FALSE
Oxacillinases	5–6m	Postnatal	-18.4229		1191.12	-4	0.997412	1		FALSE
Sapovirus	5–6m	Postnatal	-0.381541	-1.96903	1.13952	-1.76723	0.621063	1	primiparity;m_bmiincl;m_hbincl;ga_days_incl;GWG;m_heightincl;m_muacincl	FALSE	FALSE	TRUE	0.607143
Norovirus GII4	5–6m	Postnatal	-0.113558	-1.64489	1.39442	-0.525977	0.880099	1	primiparity;m_bmiincl;m_hbincl;GWG;w_age;m_heightincl;m_muacincl	FALSE
Norovirus GI1	5–6m	Postnatal	-1.05681e-14			-1.79425e-14	1	1		FALSE
Cryptosporidium parvum	5–6m	Postnatal	-1.05681e-14			-1.79425e-14	1	1		FALSE
Necator americanus	5–6m	Postnatal	-1.05681e-14			-1.79425e-14	1	1		FALSE
Salmonella tetrathionate reductase gene	5–6m	Postnatal	0.0431106	-1.06125	1.16967	0.19968	0.938693	1	m_bmiincl;m_hbincl;w_age;m_heightincl;m_muacincl	FALSE	FALSE	TRUE	0.67619
Salmonella invasion gene A	5–6m	Postnatal	0.396878	-0.770617	1.65467	1.83826	0.512595	1	m_bmiincl;w_age;m_heightincl;m_muacincl	FALSE	FALSE	TRUE	0.67619

## Sheet: gut_SCFAs
feature	timepoint	intervention	estimate	conf_low_semi	conf_high_semi	estimate_scaled	p.value	q.value	covariate	sig	from_xgb	from_boruta	best_auc
Acetate	Tri3	Pre+Postnatal	1.96253	-5.96838	9.89344	3.31463	0.623309	0.675959	primiparity;m_bmiincl;m_hbincl;ga_days_incl;GWG;m_heightincl	FALSE
Propionate	Tri3	Pre+Postnatal	-1.49555	-5.74353	2.75243	-1.47883	0.485324	0.675959	primiparity;m_hbincl	FALSE	FALSE	TRUE	0.625
Isobutyrate	Tri3	Pre+Postnatal	-0.173579	-0.9979	0.650741	0.353639	0.675959	0.675959	primiparity;m_bmiincl;m_hbincl;ga_days_incl;GWG	FALSE
Butyrate	Tri3	Pre+Postnatal	-1.83594	-5.71678	2.0449	-1.95066	0.348872	0.675959	primiparity;m_hbincl;ga_days_incl;GWG;w_age	FALSE
Isovalerate	Tri3	Pre+Postnatal	-1.14171	-2.67531	0.391896	-0.988347	0.142253	0.675959	primiparity;m_hbincl;ga_days_incl	FALSE	TRUE	FALSE	0.625
Valerate	Tri3	Pre+Postnatal	-0.606902	-1.89993	0.686125	-0.247018	0.352711	0.675959	primiparity;m_hbincl;ga_days_incl;w_age	FALSE
Isocaproate	Tri3	Pre+Postnatal	-0.638613	-2.82577	1.54854	-0.290974	0.562278	0.675959	primiparity;m_bmiincl;m_hbincl;ga_days_incl;GWG;w_age;m_heightincl	FALSE
Caproate	Tri3	Pre+Postnatal	-0.348557	-1.79658	1.09947	0.11109	0.632847	0.675959	primiparity;m_hbincl;ga_days_incl;GWG;m_heightincl	FALSE
Acetate	1–2m	Pre+Postnatal	-12.0545	-25.5888	1.47979	-4	0.0801034	0.156084		FALSE
Propionate	1–2m	Pre+Postnatal	-1.9787	-4.66674	0.70934	-2.14855	0.146778	0.195704	w_age	FALSE
Isobutyrate	1–2m	Pre+Postnatal	-0.356406	-0.746578	0.0337656	0.100211	0.0728023	0.156084	m_hbincl;w_age	FALSE
Butyrate	1–2m	Pre+Postnatal	-2.4098	-5.27092	0.451315	-2.74613	0.0975523	0.156084	ga_days_incl;w_age	FALSE
Isovalerate	1–2m	Pre+Postnatal	0.500434	-0.562344	1.56321	1.28793	0.351176	0.401344	primiparity;m_hbincl;ga_days_incl;w_age	FALSE
Valerate	1–2m	Pre+Postnatal	-0.875898	-1.79644	0.0446455	-0.61989	0.061889	0.156084	ga_days_incl	FALSE
Isocaproate	1–2m	Pre+Postnatal	0.747033	-1.45305	2.94712	1.62976	0.50086	0.50086	m_bmiincl;m_hbincl;w_age	FALSE
Caproate	1–2m	Pre+Postnatal	5.82233	-0.465639	12.1103	4	0.0690534	0.156084	m_hbincl;w_age	FALSE
Acetate	5–6m	Pre+Postnatal	2.41608	-9.87094	17.4401	3.94332	0.714237	0.976804	primiparity;m_bmiincl;m_hbincl;ga_days_incl;w_age;m_heightincl;m_muacincl	FALSE
Propionate	5–6m	Pre+Postnatal	-1.63576	-4.34337	1.38588	-1.67319	0.261488	0.976804	primiparity;ga_days_incl;m_heightincl;m_muacincl	FALSE
Isobutyrate	5–6m	Pre+Postnatal	-0.00880106	-0.586268	0.607815	0.582048	0.976804	0.976804	primiparity;m_hbincl;ga_days_incl;w_age;m_muacincl	FALSE
Butyrate	5–6m	Pre+Postnatal	-0.398356	-2.83687	2.16205	0.0420617	0.753556	0.976804	primiparity;m_hbincl;ga_days_incl;w_age;m_heightincl;m_muacincl	FALSE
Isovalerate	5–6m	Pre+Postnatal	-0.265162	-1.09927	0.568948	0.22669	0.528409	0.976804	m_hbincl;ga_days_incl;w_age;m_muacincl	FALSE
Valerate	5–6m	Pre+Postnatal	-0.459044	-1.42364	0.575601	-0.0420617	0.366516	0.976804	ga_days_incl;w_age;m_muacincl	FALSE
Isocaproate	5–6m	Pre+Postnatal	-0.969533	-3.58723	1.37711	-0.749683	0.438364	0.976804	primiparity;m_hbincl;w_age;m_muacincl	FALSE
Caproate	5–6m	Pre+Postnatal	0.301123	-3.98698	4.56196	1.01165	0.889786	0.976804	primiparity;m_bmiincl;m_hbincl;ga_days_incl;w_age;m_heightincl;m_muacincl	FALSE

## Sheet: gut_calprotectin
feature	timepoint	intervention	estimate	conf_low_semi	conf_high_semi	estimate_scaled	p.value	q.value	covariate	sig
calprotectin	Tri2, mother	Prenatal	27.7874	-15.9105	38.0657	0.817791	0.186105	0.186105	primiparity;m_bmiincl;m_hbincl;ga_days_incl;GWG;w_age;m_heightincl;m_muacincl	FALSE
calprotectin	Tri3, mother	Prenatal	12.1143	-58.6669	21.4986	0.0275526	0.67306	0.67306	primiparity;m_bmiincl;m_hbincl;GWG;w_age;m_muacincl	FALSE
calprotectin	1–2m, infant	Pre+Postnatal	-21.3682	-179.047	123.343	-1.66064	0.76992	0.76992	primiparity;m_bmiincl;ga_days_incl;GWG;w_age;m_heightincl;m_muacincl	FALSE
calprotectin	1–2m, infant	Prenatal	-56.0262	-243.415	66.0607	-3.4081	0.464178	0.464178	primiparity;m_bmiincl;m_hbincl;ga_days_incl;GWG;w_age;m_heightincl;m_muacincl	FALSE
calprotectin	1–2m, infant	Postnatal	-37.6231	-185.594	86.379	-2.48022	0.59057	0.59057	primiparity;m_bmiincl;m_hbincl;ga_days_incl;GWG;w_age;m_heightincl;m_muacincl	FALSE
calprotectin	5–6m, infant	Pre+Postnatal	6.94705	-265.658	296.098	-0.232983	0.960691	0.960691	primiparity;m_bmiincl;m_hbincl;ga_days_incl;GWG;w_age;m_heightincl;m_muacincl	FALSE
calprotectin	5–6m, infant	Prenatal	253.749	-77.422	556.981	4	0.0902905	0.0902905	m_hbincl;GWG;w_age;m_muacincl	FALSE
calprotectin	5–6m, infant	Postnatal	28.8641	-258.082	268.815	0.872079	0.831316	0.831316	primiparity;m_bmiincl;m_hbincl;ga_days_incl;GWG;w_age;m_heightincl;m_muacincl	FALSE
calprotectin	1–2m, mother	Pre+Postnatal	-7.82333	-39.1837	32.2109	-0.977708	0.757327	0.757327	primiparity;m_bmiincl;m_hbincl;ga_days_incl;GWG;w_age;m_heightincl;m_muacincl	FALSE
calprotectin	1–2m, mother	Prenatal	12.306	-19.3413	50.8201	0.0372179	0.641772	0.641772	primiparity;m_bmiincl;w_age;m_muacincl	FALSE
calprotectin	1–2m, mother	Postnatal	31.8433	-20.6536	87.5945	1.02229	0.182532	0.182532	primiparity;m_bmiincl;w_age;m_muacincl	FALSE
calprotectin	5–6m, mother	Pre+Postnatal	11.0214	-280.096	332.739	-0.0275526	0.933809	0.933809	primiparity;m_bmiincl;m_hbincl;ga_days_incl;GWG	FALSE
calprotectin	5–6m, mother	Prenatal	-169.73	-492.052	119.299	-4	0.230238	0.230238		FALSE
calprotectin	5–6m, mother	Postnatal	71.1226	-245.46	342.229	3.00276	0.576796	0.576796	primiparity;m_hbincl;ga_days_incl;GWG;w_age;m_muacincl	FALSE
