# Supplementary material
Source: Research Square preprint supplement (doi:10.21203/rs.3.rs-10290866/v1)
Supplement: Supplementary file 5 [file 8b7d786e714a54ce255c756d.xlsx]

## Sheet: Description
	Mediation analyses of the associations between prenatal balanced energy–protein (BEP) supplementation and infant growth outcomes. This table summarizes mediation analyses evaluating whether maternal, milk and infant molecular features mediated the associations between prenatal BEP supplementation and infant growth outcomes. Separate worksheets present results for targeted milk components, prenata…
	Worksheets: milk, prenatal, metabolome and proteome common columns
	These worksheets summarize mediation analyses for targeted milk components, prenatal maternal proteins, untargeted metabolomic features and untargeted proteomic features, respectively.
source_file:	Source dataset from which the mediator was obtained.
exposure:	Exposure variable included in the mediation model.
layer:	Omics or biological layer of the mediator.
mediator:	Mediating feature evaluated in the model.
timepoint:	Time point at which the mediator was measured.
outcome:	Infant growth outcome.
month:	Age at outcome assessment (months).
n:	Number of participants included in the mediation analysis.
ind_est:	Estimated indirect (mediated) effect.
ind_l:	Lower bound of the 95% confidence interval for the indirect effect.
ind_u:	Upper bound of the 95% confidence interval for the indirect effect.
ind_p:	Nominal P value for the indirect effect.
dir_est:	Estimated direct effect.
dir_l:	Lower bound of the 95% confidence interval for the direct effect.
dir_u:	Upper bound of the 95% confidence interval for the direct effect.
dir_p:	Nominal P value for the direct effect.
tot_est:	Estimated total effect.
tot_l:	Lower bound of the 95% confidence interval for the total effect.
tot_u:	Upper bound of the 95% confidence interval for the total effect.
tot_p:	Nominal P value for the total effect.
ind_fdr:	False discovery rate (FDR)-adjusted P value for the indirect effect.
dir_fdr:	FDR-adjusted P value for the direct effect.
tot_fdr:	FDR-adjusted P value for the total effect.
	Worksheet: milk additional columns
omics_family:	Biological category of the mediator (e.g., nutrient, human milk oligosaccharide, metabolite or microbiome feature).
pct_med:	Percentage of the total effect mediated by the indirect pathway.
pct_med_l:	Lower bound of the 95% confidence interval for the mediated proportion.
pct_med_u:	Upper bound of the 95% confidence interval for the mediated proportion.
pct_med_ci:	Confidence interval of the mediated proportion
	Worksheet: prenatal and proteome additional columns
protein name:	Full protein name.
gene names:	Official gene symbol(s).
length:	Protein sequence length (amino acids).
	Worksheet: pathway
	This worksheet summarizes pathway enrichment analyses of significant metabolomic mediators identified in the mediation analyses.
source_file:	Source dataset from which the mediator was obtained.
N feature as reference:	Total number of metabolomic features used as the reference set for pathway enrichment.
N feature significant:	Number of significant metabolomic mediators contributing to pathway enrichment.
pathway:	Name of the enriched metabolic pathway.
overlap_size:	Number of significant mediators mapped to the pathway.
pathway_size:	Total number of compounds in the reference pathway.
p-value:	Nominal enrichment P value.
overlap_EmpiricalCompounds:	Empirical compound identifiers mapped to the pathway.
Input m/z:	Mass-to-charge ratio (m/z) of the contributing metabolomic feature.
RT:	Retention time of the contributing feature.
compounds:	Putative metabolite identifier.
compound_names:	Putative metabolite annotation.
feature:	Feature identifier.
ionization_mode:	LC–MS ionization mode (positive or negative).
beta_semi:	Standardized regression coefficient for the mediator.
mediator:	Mediator included in the mediation analysis.
dataset:	Biological dataset in which the mediator was measured.
timepoint:	Time point at which the mediator was measured.
outcome:	Infant growth outcome.
months:	Age at outcome assessment (months).
n:	Number of participants included in the mediation analysis.
ind_est:	Estimated indirect (mediated) effect.
ind_l:	Lower bound of the 95% confidence interval for the indirect effect.
ind_u:	Upper bound of the 95% confidence interval for the indirect effect.

## Sheet: milk
source_file	exposure	layer	mediator	timepoint	outcome	month	n	ind_est	ind_l	ind_u	ind_p	dir_est	dir_l	dir_u	dir_p	tot_est	tot_l	tot_u	tot_p	ind_fdr	dir_fdr	tot_fdr	omics_family	pct_med	pct_med_l	pct_med_u	pct_med_ci
lavaan_mediation_preBEP_bio12_hc3.csv	preBEP	bio	IgA	pn12	hc	3	281	0.0963961	0.0781475	0.361194	0.213618	3.72395	0.424256	7.07258	0.0273073	3.82034	0.634203	7.22348	0.0229998	0.985422	0.0273073	0.0244438	Milk	2.5	2	9.5	2.5% (95% CI 2 to 9.5%)
lavaan_mediation_preBEP_bio12_hc4.csv	preBEP	bio	IgA	pn12	hc	4	279	0.054972	0.0356086	0.22278	0.248462	3.57946	0.435279	7.45129	0.0306233	3.63443	0.51191	7.50606	0.0273995	0.903619	0.0306233	0.0273995	Milk	1.5	1	6.1	1.5% (95% CI 1 to 6.1%)
lavaan_mediation_preBEP_bio12_muac3.csv	preBEP	bio	IgA	pn12	muac	3	281	0.123628	0.10491	0.448408	0.212454	3.63434	1.12515	6.32437	0.00488779	3.75796	1.25743	6.50149	0.00343443	0.954874	0.00488779	0.00460343	Milk	3.3	2.8	11.9	3.3% (95% CI 2.8 to 11.9%)
lavaan_mediation_preBEP_bio12_muac4.csv	preBEP	bio	IgA	pn12	muac	4	279	0.147689	0.126531	0.688133	0.270426	3.45341	0.907117	6.27395	0.0139957	3.6011	1.19334	6.85134	0.0105826	0.928142	0.0150188	0.0147789	Milk	4.1	3.5	19.1	4.1% (95% CI 3.5 to 19.1%)
lavaan_mediation_preBEP_bio12_waz3.csv	preBEP	bio	IgA	pn12	waz	3	281	0.0090672	0.00757659	0.0325673	0.208727	0.34311	0.0874279	0.60497	0.00581469	0.352177	0.104296	0.612825	0.00455874	0.943339	0.00678381	0.00531853	Milk	2.6	2.2	9.2	2.6% (95% CI 2.2 to 9.2%)
lavaan_mediation_preBEP_bio12_weight3.csv	preBEP	bio	IgA	pn12	weight	3	281	0.0084687	0.00728292	0.0304418	0.213186	0.298139	0.12439	0.518713	0.00121862	0.306608	0.134665	0.528501	0.00086506	0.944508	0.00142173	0.00101757	Milk	2.8	2.4	9.9	2.8% (95% CI 2.4 to 9.9%)
lavaan_mediation_preBEP_bio12_weight4.csv	preBEP	bio	IgA	pn12	weight	4	279	0.00993053	0.00838673	0.0447809	0.277634	0.283116	0.10407	0.457086	0.00331781	0.293047	0.117401	0.481509	0.00228866	0.902543	0.00580617	0.00517728	Milk	3.4	2.9	15.3	3.4% (95% CI 2.9 to 15.3%)
lavaan_mediation_preBEP_bio12_whz3.csv	preBEP	bio	IgA	pn12	whz	3	281	-0.00267782	-0.0111099	-0.0014339	0.320113	0.273801	0.0529497	0.575328	0.0473984	0.271123	0.0509035	0.566669	0.0479968	0.996386	0.0473984	0.0506487	Milk	-1	-4.1	-0.5	-1% (95% CI -4.1 to -0.5%)
lavaan_mediation_preBEP_biopn12_muac2.csv	preBEP	bio	IgA	pn12	muac	2	281	0.069853	0.0545505	0.240654	0.206404	3.62386	1.57738	6.45689	0.00233241	3.69371	1.64907	6.54087	0.00176369	0.966714	0.00233241	0.00205764	Milk	1.9	1.5	6.5	1.9% (95% CI 1.5 to 6.5%)
lavaan_mediation_preBEP_biopn12_waz2.csv	preBEP	bio	IgA	pn12	waz	2	281	0.00902801	0.00735098	0.0317563	0.194295	0.345583	0.131244	0.598231	0.002443	0.354611	0.144911	0.612231	0.00175776	0.983385	0.00356618	0.00384058	Milk	2.5	2.1	9	2.5% (95% CI 2.1 to 9%)
lavaan_mediation_preBEP_biopn12_weight2.csv	preBEP	bio	IgA	pn12	weight	2	281	0.00729972	0.00628097	0.0249659	0.189546	0.247294	0.0813982	0.388998	0.00227167	0.254594	0.0917737	0.398593	0.00150395	0.962509	0.00227167	0.00251872	Milk	2.9	2.5	9.8	2.9% (95% CI 2.5 to 9.8%)
lavaan_mediation_preBEP_hmo12_weight4.csv	preBEP	hmo	X2.FL	pn12	weight	4	279	-0.0250913	-0.0671728	-0.000482141	0.158578	0.318138	0.139914	0.478718	0.000461665	0.293047	0.103576	0.468336	0.00170238	0.954079	0.00610597	0.00664424	Milk	-8.6	-22.9	-0.2	-8.6% (95% CI -22.9 to -0.2%)
lavaan_mediation_preBEP_hmo1421_waz2.csv	preBEP	hmo	LSTc	1421	waz	2	269	0.03685	0.00272386	0.0887169	0.111245	0.304249	0.059145	0.518854	0.0135705	0.341099	0.0916301	0.569043	0.00601377	0.984345	0.0135705	0.00921855	Milk	10.8	0.8	26	10.8% (95% CI 0.8 to 26%)
lavaan_mediation_preBEP_hmo34_weight5.csv	preBEP	hmo	LSTb	pn34	weight	5	266	-0.033285	-0.0852013	-0.00252873	0.109484	0.289637	0.0325126	0.525653	0.013635	0.256352	0.00749658	0.482395	0.0259364	0.858008	0.0260495	0.0294732	Milk	-13	-33.2	-1	-13% (95% CI -33.2 to -1%)
lavaan_mediation_preBEP_marpn12_whz2.csv	preBEP	mar	FAT	pn12	whz	2	276	-0.0501859	-0.127958	-0.00448172	0.0940517	0.311705	0.0418348	0.614597	0.0297438	0.261519	-0.000970158	0.553072	0.0693482	0.188103	0.0660513	0.0939098	Milk	-19.2	-48.9	-1.7	-19.2% (95% CI -48.9 to -1.7%)
lavaan_mediation_preBEP_met12_hc3.csv	preBEP	met	TG.16.0_40.7.	pn12	hc	3	281	0.666146	0.0747805	1.78907	0.117342	3.1542	0.281176	6.74815	0.0489954	3.82034	1.05627	7.50109	0.017191	0.950913	0.0497802	0.0290367	Milk	17.4	2	46.8	17.4% (95% CI 2 to 46.8%)
lavaan_mediation_preBEP_met12_hc3.csv	preBEP	met	TG.16.1_34.1.	pn12	hc	3	281	0.554825	0.00192508	1.54091	0.130337	3.26552	0.166495	7.04937	0.0427247	3.82034	0.769038	7.28558	0.0190907	0.950913	0.0446348	0.0290367	Milk	14.5	0.1	40.3	14.5% (95% CI 0.1 to 40.3%)
lavaan_mediation_preBEP_met12_hc3.csv	preBEP	met	TG.22.6_34.1.	pn12	hc	3	281	0.664692	0.125137	1.47978	0.0600736	3.15565	0.237854	6.59202	0.044338	3.82034	1.05939	7.48321	0.0162124	0.950913	0.0459954	0.0290367	Milk	17.4	3.3	38.7	17.4% (95% CI 3.3 to 38.7%)
lavaan_mediation_preBEP_met1421_muac2.csv	preBEP	met	p.Cresol.SO4	1421	muac	2	269	0.422874	0.00242534	1.04094	0.102215	3.1994	1.29218	5.31079	0.00140859	3.62227	1.55639	5.84737	0.000326759	0.99917	0.00263793	0.00283716	Milk	11.7	0.1	28.7	11.7% (95% CI 0.1 to 28.7%)
lavaan_mediation_preBEP_met1421_waz2.csv	preBEP	met	p.Cresol.SO4	1421	waz	2	269	0.0587183	0.000248749	0.136097	0.0826573	0.282381	0.0742553	0.522213	0.0123375	0.341099	0.128803	0.57941	0.00273758	0.999523	0.0124497	0.00816212	Milk	17.2	0.1	39.9	17.2% (95% CI 0.1 to 39.9%)
lavaan_mediation_preBEP_met1421_weight2.csv	preBEP	met	p.Cresol.SO4	1421	weight	2	269	0.0356607	0.000170779	0.0829239	0.0943337	0.224039	0.0746772	0.382425	0.00614496	0.259699	0.102252	0.422823	0.00163764	0.999093	0.00622914	0.00428849	Milk	13.7	0.1	31.9	13.7% (95% CI 0.1 to 31.9%)
lavaan_mediation_preBEP_met34_muac4.csv	preBEP	met	Cer.d18.2.24.1.	pn34	muac	4	274	0.405421	0.0113237	1.35196	0.179937	3.41839	1.08116	6.31059	0.00760966	3.82381	1.21645	6.45772	0.00329356	0.999481	0.0102395	0.0102962	Milk	10.6	0.3	35.4	10.6% (95% CI 0.3 to 35.4%)
lavaan_mediation_preBEP_mic12_muac4.csv	preBEP	mic	Corynebacterium.258	pn12	muac	4	279	-0.59012	-1.42815	-0.0600424	0.074574	4.19122	1.34887	6.65638	0.00152752	3.6011	0.844487	6.2654	0.00696359	0.993994	0.0156151	0.0138888	Milk	-16.4	-39.7	-1.7	-16.4% (95% CI -39.7 to -1.7%)
lavaan_mediation_preBEP_mic12_whz4.csv	preBEP	mic	Unclassified.Enterobacteriaceae_A.34	pn12	whz	4	279	-0.0474429	-0.100899	-0.00152801	0.0759857	0.31113	0.0595765	0.640909	0.0234661	0.263687	0.00494042	0.573677	0.0486964	0.981676	0.0781749	0.0698733	Milk	-18	-38.3	-0.6	-18% (95% CI -38.3 to -0.6%)
lavaan_mediation_preBEP_mic1421_whz1.csv	preBEP	mic	Brevundimonas.18	1421	whz	1	273	0.0447097	0.00310476	0.094865	0.0706351	0.335365	0.0988339	0.617188	0.0107208	0.380075	0.129303	0.677453	0.00456951	0.997989	0.0126791	0.0105341	Milk	11.8	0.8	25	11.8% (95% CI 0.8 to 25%)
lavaan_mediation_preBEP_mic34_hc5.csv	preBEP	mic	Escherichia_710834.34	pn34	hc	5	266	-0.563586	-1.18932	-0.00289252	0.0716604	4.56947	0.602567	7.65842	0.00978285	4.00588	0.201756	7.08513	0.0236372	0.999736	0.0346137	0.0332856	Milk	-14.1	-29.7	-0.1	-14.1% (95% CI -29.7 to -0.1%)
lavaan_mediation_preBEP_micpn12_muac2.csv	preBEP	mic	Corynebacterium.258	pn12	muac	2	281	-0.500335	-1.4138	-0.00766073	0.125427	4.19405	2.09585	6.34096	7.69026e-05	3.69371	1.4807	6.01448	0.000787118	0.973252	0.00176348	0.00165476	Milk	-13.5	-38.3	-0.2	-13.5% (95% CI -38.3 to -0.2%)
lavaan_mediation_preBEP_min34_muac4.csv	preBEP	min	Se	pn34	muac	4	271	0.676913	0.0434378	1.48373	0.0653933	3.40609	0.501474	6.71879	0.0168564	4.083	1.27756	7.52479	0.00465217	0.850113	0.0168564	0.00604783	Milk	16.6	1.1	36.3	16.6% (95% CI 1.1 to 36.3%)
lavaan_mediation_preBEP_min34_muac5.csv	preBEP	min	Se	pn34	muac	5	263	0.756223	0.105342	1.65042	0.0623291	2.97545	0.530588	5.97819	0.028016	3.73167	1.0872	7.00245	0.00694241	0.810279	0.028016	0.0125085	Milk	20.3	2.8	44.2	20.3% (95% CI 2.8 to 44.2%)
lavaan_mediation_preBEP_minpn12_weight2.csv	preBEP	min	As	pn12	weight	2	272	0.0114125	0.00124282	0.025834	0.0841002	0.22979	0.0577849	0.393922	0.00827301	0.241202	0.0697335	0.409253	0.00588344	0.997662	0.00835164	0.00695316	Milk	4.7	0.5	10.7	4.7% (95% CI 0.5 to 10.7%)

## Sheet: prenatal
source_file	exposure	layer	mediator	timepoint	outcome	month	n	ind_est	ind_l	ind_u	ind_p	dir_est	dir_l	dir_u	dir_p	tot_est	tot_l	tot_u	tot_p	ind_fdr	dir_fdr	tot_fdr		protein name	gene names	length
lavaan_mediation_preBEP_meta2_plasmatri3_ga.csv	preBEP	plasma	rLC_pos_mtb_636920	tri3	ga	0	300	-0.0739473	-0.164816	-0.00114666	0.0711568	0.330417	0.00871318	0.628544	0.0422778	0.256469	-0.0772215	0.608263	0.12708	0.998249	0.234535	0.18444
lavaan_mediation_preBEP_meta2_vamstri2_muac0.csv	preBEP	vams	rLC_neg_mtb_3392629	tri2	muac	0	91	-1.3294	-2.79635	-0.308104	0.033511	3.25287	0.19512	7.14489	0.0743742	1.92347	-1.19064	5.7618	0.272988	0.997937	0.448109	0.330307
lavaan_mediation_preBEP_meta2_vamstri3_ga.csv	preBEP	vams	rLC_neg_mtb_5486800	tri3	ga	0	281	-0.121246	-0.234578	-0.0366494	0.0121954	0.374069	0.0251147	0.76906	0.0423643	0.252823	-0.0891638	0.621446	0.170621	0.999116	0.258732	0.213222
lavaan_mediation_preBEP_meta2_vamstri3_ga.csv	preBEP	vams	rLC_neg_mtb_214803	tri3	ga	0	281	-0.0874471	-0.199223	-0.0104518	0.0903764	0.34027	0.0121773	0.70006	0.0491703	0.252823	-0.0749402	0.593126	0.153821	0.999116	0.258732	0.213222
lavaan_mediation_preBEP_meta2_vamstri3_ga.csv	preBEP	vams	rLC_neg_mtb_580163	tri3	ga	0	281	-0.0645953	-0.153776	-0.00175061	0.102093	0.317418	0.000972684	0.701137	0.0923102	0.252823	-0.0983162	0.651483	0.19336	0.999116	0.258732	0.213222
lavaan_mediation_preBEP_meta2_vamstri3_ga.csv	preBEP	vams	rLC_neg_mtb_4967806	tri3	ga	0	281	-0.0604905	-0.137717	-0.00719693	0.0767372	0.313314	0.0164926	0.693884	0.06817	0.252823	-0.0549815	0.620839	0.137343	0.999116	0.258732	0.213222
lavaan_mediation_preBEP_meta2_vamstri3_ga.csv	preBEP	vams	rLC_neg_mtb_4584483	tri3	ga	0	281	-0.0705274	-0.155063	-0.00428089	0.0614699	0.32335	0.0193831	0.682806	0.0638451	0.252823	-0.0522389	0.654974	0.155837	0.999116	0.258732	0.213222
lavaan_mediation_preBEP_meta2_vamstri3_lbw.csv	preBEP	vams	rLC_neg_mtb_239155	tri3	lbw	0	278	0.0907144	0.00837625	0.173053	0.030823	-0.404369	-0.776519	-0.0322181	0.0332011	-0.313654	-0.692539	0.0652304	0.10469	0.99723	0.162351	0.10469
lavaan_mediation_preBEP_prot_depletedtri3_ga.csv	preBEP	depleted	Q9UBX5	tri3	ga	0	148	-0.148493	-0.41104	-0.0145759	0.114666	0.562726	0.0852624	1.19009	0.0389675	0.414234	-0.0858925	1.04247	0.129817	0.653003	0.298451	0.175793		Fibulin-5	FBLN5	448 AA

## Sheet: metabolome
source_file	exposure	layer	mediator	timepoint	outcome	month	n	ind_est	ind_l	ind_u	ind_p	dir_est	dir_l	dir_u	dir_p	tot_est	tot_l	tot_u	tot_p	ind_fdr	dir_fdr	tot_fdr
lavaan_mediation_preBEP_meta_vamspn12e_height3.csv	preBEP	infant vams	vam_1000021	pn12e	height	3	279	-0.0886352	-0.254801	-0.00717743	0.143444	0.771035	0.210356	1.489	0.016696	0.6824	0.0887813	1.44495	0.0340702	0.999887	0.0409806	0.0378505
lavaan_mediation_preBEP_meta_vamspn12e_muac2.csv	preBEP	infant vams	vam_1000021	pn12e	muac	2	280	-0.353433	-0.786536	-0.0335767	0.0903846	4.21972	1.83451	6.5917	0.000200331	3.86629	1.72816	6.22613	0.000443113	0.999992	0.000801587	0.000831502
lavaan_mediation_preBEP_meta_vamspn12e_waz2.csv	preBEP	infant vams	vam_1000021	pn12e	waz	2	280	-0.0489257	-0.102096	-0.0117191	0.0321924	0.423359	0.188985	0.630817	0.000479469	0.374433	0.154063	0.596328	0.00195001	0.999769	0.00322226	0.00308845
lavaan_mediation_preBEP_meta_vamspn12e_weight2.csv	preBEP	infant vams	vam_1000021	pn12e	weight	2	280	-0.038613	-0.0780987	-0.0126028	0.0201131	0.311141	0.169312	0.471254	4.84316e-05	0.272528	0.142449	0.423899	0.000409093	0.999792	0.00131823	0.0012299
lavaan_mediation_preBEP_meta_vamspn12e_weight3.csv	preBEP	infant vams	vam_1000021	pn12e	weight	3	279	-0.0288519	-0.0887137	-0.00288935	0.152222	0.346651	0.168395	0.502845	9.88384e-05	0.317799	0.138412	0.482767	0.000412287	0.999747	0.000897473	0.00083058
lavaan_mediation_preBEP_meta_vamspn12e_hc2.csv	preBEP	infant vams	vam_1000105	pn12e	hc	2	280	-0.537936	-1.35825	-0.0662771	0.0821891	4.53956	0.983281	7.75738	0.00279818	4.00162	0.674352	7.09389	0.00767162	0.999891	0.0201406	0.0187671
lavaan_mediation_preBEP_meta_vamspn12e_hc3.csv	preBEP	infant vams	vam_1000105	pn12e	hc	3	279	-0.772992	-1.56808	-0.0371043	0.0324441	4.73715	1.82941	7.95903	0.00258314	3.96415	0.938706	7.79001	0.0176231	0.999812	0.024818	0.0243527
lavaan_mediation_preBEP_meta_vamspn12e_hc4.csv	preBEP	infant vams	vam_1000105	pn12e	hc	4	277	-0.77855	-1.59838	-0.187147	0.0218826	4.72206	1.52864	8.15989	0.00549924	3.94351	0.867672	7.4254	0.0181453	0.999539	0.0294039	0.028137
lavaan_mediation_preBEP_meta_vamspn34e_hc4.csv	preBEP	infant vams	vam_1000454	pn34e	hc	4	279	0.505958	0.0172422	1.17351	0.10496	3.45002	0.753439	6.9085	0.0380395	3.95597	1.05666	7.5247	0.0195027	0.999838	0.0393386	0.0281731
lavaan_mediation_preBEP_meta_vamspn34e_hc5.csv	preBEP	infant vams	vam_1000454	pn34e	hc	5	271	0.578452	0.0298053	1.35889	0.116192	3.53377	0.4525	6.77594	0.0289644	4.11222	0.509234	7.74769	0.0140045	0.999941	0.0333086	0.0279185
lavaan_mediation_preBEP_meta_vamspn12e_hc3.csv	preBEP	infant vams	vam_1000574	pn12e	hc	3	279	-0.504675	-1.11356	-0.0227007	0.0883482	4.46883	1.38198	7.91774	0.00579641	3.96415	1.03547	7.51461	0.014825	0.999812	0.024818	0.0243527
lavaan_mediation_preBEP_meta_vamspn12e_height4.csv	preBEP	infant vams	vam_1000931	pn12e	height	4	277	-0.100231	-0.269475	-0.00348293	0.148086	0.662761	0.0931145	1.24695	0.0300807	0.562529	-0.0189586	1.13127	0.0627518	0.999839	0.0956366	0.0885058
lavaan_mediation_preBEP_meta_vamspn12e_weight2.csv	preBEP	infant vams	vam_1000931	pn12e	weight	2	280	-0.0204832	-0.0589344	-0.000348926	0.192925	0.293011	0.127982	0.436033	0.000102124	0.272528	0.110962	0.414225	0.000285457	0.999792	0.00131823	0.0012299
lavaan_mediation_preBEP_meta_vamspn12e_weight4.csv	preBEP	infant vams	vam_1000931	pn12e	weight	4	277	-0.0337358	-0.0816063	-0.00190823	0.105529	0.351289	0.147394	0.550403	0.000386769	0.317553	0.122737	0.52534	0.00165563	0.999982	0.00285305	0.00261558
lavaan_mediation_preBEP_meta_vamspn56e_haz7.csv	preBEP	infant vams	vam_1001151	pn56e	haz	7	210	-0.0601551	-0.143315	-0.00284004	0.0833252	0.363475	0.0679003	0.722179	0.0295813	0.30332	0.0175318	0.691173	0.0672487	0.999766	0.103816	0.0996811
lavaan_mediation_preBEP_meta_vamsbirth_whz1.csv	preBEP	infant vams	vam_1001496	birth	whz	1	190	-0.085535	-0.198642	-0.00488924	0.071734	0.366519	0.0511262	0.628772	0.0221229	0.280984	-0.0369841	0.56923	0.080768	0.91661	0.165774	0.124134
lavaan_mediation_preBEP_meta_vamspn34e_hc4.csv	preBEP	infant vams	vam_1001604	pn34e	hc	4	279	0.571549	0.0560246	1.41076	0.102383	3.38443	0.0446693	6.55658	0.0546707	3.95597	0.807004	7.22012	0.0180739	0.999838	0.0547272	0.0281731
lavaan_mediation_preBEP_meta_vamspn34e_muac4.csv	preBEP	infant vams	vam_1001604	pn34e	muac	4	279	0.546267	0.098616	1.14657	0.0394549	3.2351	0.291094	6.04407	0.0195091	3.78137	0.895825	6.53404	0.00614737	0.999931	0.019651	0.0103065
lavaan_mediation_preBEP_meta_vamspn34e_weight4.csv	preBEP	infant vams	vam_1001604	pn34e	weight	4	279	0.0447043	0.0062347	0.09001	0.0370407	0.278106	0.0856813	0.469962	0.00624266	0.322811	0.131999	0.516328	0.0016739	0.999939	0.00643526	0.00354385
lavaan_mediation_preBEP_meta_vamspn56e_whz7.csv	preBEP	infant vams	vam_1001875	pn56e	whz	7	210	-0.0451097	-0.136777	-0.00053405	0.199339	0.377155	0.0289188	0.720513	0.0346534	0.332046	-0.0170597	0.661523	0.0560542	0.999985	0.0605031	0.0602463
lavaan_mediation_preBEP_meta_vamspn34e_whz4.csv	preBEP	infant vams	vam_1002909	pn34e	whz	4	279	-0.0478826	-0.100836	-0.00716506	0.0480583	0.336417	0.0811948	0.62059	0.0149398	0.288535	0.0178099	0.589425	0.0353916	0.909688	0.0730124	0.0488746
lavaan_mediation_preBEP_meta_vamspn12e_muac4.csv	preBEP	infant vams	vam_1003267	pn12e	muac	4	277	-0.381768	-0.990019	-0.00511982	0.124985	4.17266	1.76193	6.3785	0.00131281	3.79089	1.48764	6.04911	0.00275453	0.999838	0.00940488	0.0087033
lavaan_mediation_preBEP_meta_vamspn12e_waz2.csv	preBEP	infant vams	vam_1003290	pn12e	waz	2	280	0.0532134	0.000141583	0.137111	0.116341	0.32122	0.057981	0.557525	0.00835338	0.374433	0.116688	0.602625	0.00191858	0.999769	0.00835338	0.00308845
lavaan_mediation_preBEP_meta_vamspn34e_haz5.csv	preBEP	infant vams	vam_1003727	pn34e	haz	5	271	-0.0669436	-0.12419	-0.0122654	0.0226789	0.274798	0.0103072	0.538759	0.0381575	0.207854	-0.0377403	0.476828	0.120468	0.999832	0.205175	0.191026
lavaan_mediation_preBEP_meta_vamspn34e_height4.csv	preBEP	infant vams	vam_1003727	pn34e	height	4	279	-0.12527	-0.249577	-0.0234446	0.0225404	0.667511	0.0963322	1.28985	0.0303907	0.542241	-0.0255763	1.19872	0.0783133	0.999948	0.108136	0.106157
lavaan_mediation_preBEP_meta_vamspn34e_height5.csv	preBEP	infant vams	vam_1003727	pn34e	height	5	271	-0.139398	-0.27968	-0.0102612	0.0480892	0.734733	0.0954273	1.28244	0.0102067	0.595335	-0.0624924	1.15757	0.0370852	0.999367	0.0930636	0.0849576
lavaan_mediation_preBEP_meta_vamspn12e_hc2.csv	preBEP	infant vams	vam_1003801	pn12e	hc	2	280	-0.681809	-1.34768	-0.0954737	0.0311873	4.68343	0.832402	7.85601	0.00527891	4.00162	0.278949	7.22302	0.0153828	0.999891	0.0201406	0.0187671
lavaan_mediation_preBEP_meta_vamspn12e_hc3.csv	preBEP	infant vams	vam_1003801	pn12e	hc	3	279	-0.815839	-1.69199	-0.166845	0.0345143	4.77999	1.46748	7.97292	0.00342749	3.96415	0.931681	7.10673	0.0139269	0.999812	0.024818	0.0243527
lavaan_mediation_preBEP_meta_vamspn12e_hc4.csv	preBEP	infant vams	vam_1003801	pn12e	hc	4	277	-0.868243	-1.6911	-0.122443	0.0279211	4.81175	0.910396	7.98063	0.0047509	3.94351	0.229545	7.0973	0.0223395	0.999539	0.0294039	0.028137
lavaan_mediation_preBEP_meta_vamspn12e_waz4.csv	preBEP	infant vams	vam_1003974	pn12e	waz	4	276	-0.0182851	-0.0357545	-0.00139723	0.0393479	0.338209	0.0494998	0.556619	0.00370165	0.319924	0.039351	0.538976	0.00494957	0.999876	0.0157355	0.014171
lavaan_mediation_preBEP_meta_vamspn12e_whz4.csv	preBEP	infant vams	vam_1003974	pn12e	whz	4	277	-0.037931	-0.0681855	-0.00833096	0.0236281	0.314528	0.0458495	0.627794	0.0215171	0.276597	0.00230151	0.607159	0.043154	0.999669	0.0627933	0.0541655
lavaan_mediation_preBEP_meta_vamspn12e_hc4.csv	preBEP	infant vams	vam_1004055	pn12e	hc	4	277	-0.406574	-1.02039	-0.0130907	0.109477	4.35008	1.18038	7.09814	0.00340275	3.94351	0.879089	6.70934	0.00690326	0.999539	0.0294039	0.028137
lavaan_mediation_preBEP_meta_vamspn34e_muac6.csv	preBEP	infant vams	vam_1004056	pn34e	muac	6	231	-0.526288	-1.41122	-0.0199344	0.150147	3.14211	0.312333	6.56245	0.0378604	2.61582	-0.378649	5.90159	0.0766627	0.999802	0.126674	0.110796
lavaan_mediation_preBEP_meta_vamspn34e_weight6.csv	preBEP	infant vams	vam_1004056	pn34e	weight	6	231	-0.0516278	-0.125108	-0.0032928	0.098605	0.290543	0.045157	0.551573	0.0280578	0.238915	-0.0417672	0.466961	0.0634394	0.999977	0.0871376	0.0701598
lavaan_mediation_preBEP_meta_vamspn34e_hc4.csv	preBEP	infant vams	vam_1004153	pn34e	hc	4	279	-0.862213	-1.97316	-0.150807	0.0868457	4.81819	1.76506	7.87982	0.00318429	3.95597	0.270636	7.21469	0.0213685	0.999838	0.0315799	0.0281731
lavaan_mediation_preBEP_meta_vamspn34e_hc5.csv	preBEP	infant vams	vam_1004153	pn34e	hc	5	271	-0.936265	-2.17403	-0.104186	0.0614788	5.04849	1.97009	8.5709	0.00278158	4.11222	0.892998	7.55728	0.0174766	0.999941	0.0320006	0.0279185
lavaan_mediation_preBEP_meta_vamspn34e_hc6.csv	preBEP	infant vams	vam_1004153	pn34e	hc	6	231	-0.862944	-2.00114	-0.092568	0.0818781	4.07829	0.111031	7.72553	0.025622	3.21534	-0.662316	7.06123	0.0880527	0.999872	0.144046	0.120742
lavaan_mediation_preBEP_meta_vamspn34e_height4.csv	preBEP	infant vams	vam_1004153	pn34e	height	4	279	-0.138327	-0.377503	-0.0118951	0.116174	0.680568	0.0781502	1.3462	0.0340149	0.542241	-0.100857	1.24718	0.0936868	0.999948	0.108136	0.106157
lavaan_mediation_preBEP_meta_vamspn34e_muac4.csv	preBEP	infant vams	vam_1004153	pn34e	muac	4	279	-0.548855	-1.43723	-0.024125	0.123018	4.33022	1.63451	6.93015	0.00146062	3.78137	1.24422	6.44112	0.00413458	0.999931	0.0115237	0.0103065
lavaan_mediation_preBEP_meta_vamspn34e_muac5.csv	preBEP	infant vams	vam_1004153	pn34e	muac	5	271	-0.618504	-1.45845	-0.093715	0.0796522	4.04308	1.1971	7.47557	0.0118335	3.42458	0.77792	6.76642	0.0284928	0.998723	0.0296555	0.0295164
lavaan_mediation_preBEP_meta_vamspn34e_whz4.csv	preBEP	infant vams	vam_1004442	pn34e	whz	4	279	-0.0564603	-0.133928	-0.00528432	0.0821303	0.344995	0.0554123	0.643484	0.0188783	0.288535	-0.00967751	0.579582	0.0536364	0.909688	0.0730124	0.0542522
lavaan_mediation_preBEP_meta_vamspn12e_hc3.csv	preBEP	infant vams	vam_1004554	pn12e	hc	3	279	-0.418965	-1.17183	-0.0292061	0.15396	4.38312	0.949776	6.99076	0.00393169	3.96415	0.615363	6.77043	0.00935868	0.999812	0.024818	0.0243527
lavaan_mediation_preBEP_meta_vamspn12e_hc4.csv	preBEP	infant vams	vam_1004554	pn12e	hc	4	277	-0.59399	-1.39163	-0.0637527	0.0664575	4.5375	1.2781	8.13104	0.00778185	3.94351	0.909755	7.142	0.0190833	0.999539	0.0294039	0.028137
lavaan_mediation_preBEP_meta_vamspn12e_hc2.csv	preBEP	infant vams	vam_1005311	pn12e	hc	2	280	-0.645002	-1.2505	-0.199578	0.0258553	4.64662	1.88116	7.88604	0.0024977	4.00162	1.12463	7.33328	0.00985423	0.999891	0.0201406	0.0187671
lavaan_mediation_preBEP_meta_vamspn12e_hc3.csv	preBEP	infant vams	vam_1005311	pn12e	hc	3	279	-0.51479	-1.23005	-0.047603	0.102112	4.47894	0.924384	8.16428	0.0155066	3.96415	0.413768	7.82891	0.0295406	0.999812	0.024818	0.0300642
lavaan_mediation_preBEP_meta_vamspn12e_muac2.csv	preBEP	infant vams	vam_1005311	pn12e	muac	2	280	-0.598236	-1.13952	-0.128695	0.022094	4.46453	2.34906	6.50882	3.43072e-05	3.86629	1.84335	5.98662	0.000248765	0.999992	0.000801587	0.000831502
lavaan_mediation_preBEP_meta_vamspn12e_muac3.csv	preBEP	infant vams	vam_1005311	pn12e	muac	3	279	-0.609441	-1.42664	-0.0542921	0.0931388	4.38389	2.0982	6.9675	0.000565855	3.77445	1.40399	6.38122	0.00248252	0.999246	0.00487738	0.00468087
lavaan_mediation_preBEP_meta_vamspn12e_waz2.csv	preBEP	infant vams	vam_1005311	pn12e	waz	2	280	-0.0535919	-0.117207	-0.0105855	0.0346609	0.428025	0.169639	0.666312	0.000241664	0.374433	0.123192	0.642228	0.00117712	0.999769	0.00322226	0.00307962
lavaan_mediation_preBEP_meta_vamspn12e_waz3.csv	preBEP	infant vams	vam_1005311	pn12e	waz	3	279	-0.0440943	-0.099607	-0.00442571	0.110974	0.412854	0.187202	0.654441	0.000523994	0.368759	0.160801	0.602083	0.001872	0.999856	0.00389786	0.00353897
lavaan_mediation_preBEP_meta_vamspn12e_weight2.csv	preBEP	infant vams	vam_1005311	pn12e	weight	2	280	-0.0368119	-0.0709299	-0.00970334	0.0206869	0.30934	0.135914	0.476818	4.16636e-05	0.272528	0.0996618	0.439773	0.00025944	0.999792	0.00131823	0.0012299
lavaan_mediation_preBEP_meta_vamspn12e_weight3.csv	preBEP	infant vams	vam_1005311	pn12e	weight	3	279	-0.033065	-0.0742873	-0.00392911	0.0736608	0.350864	0.178677	0.534994	0.000200221	0.317799	0.150242	0.522346	0.000699239	0.999747	0.000897473	0.000882614
lavaan_mediation_preBEP_meta_vamspn12e_whz2.csv	preBEP	infant vams	vam_1005311	pn12e	whz	2	280	-0.0613666	-0.115311	-0.0168087	0.0218634	0.308246	0.00938848	0.592381	0.0348711	0.246879	-0.036477	0.523351	0.0866996	0.999963	0.129337	0.121984
lavaan_mediation_preBEP_meta_vamspn12e_whz3.csv	preBEP	infant vams	vam_1005311	pn12e	whz	3	279	-0.0505997	-0.119581	-0.00502889	0.0927336	0.296641	0.000519817	0.519583	0.0169968	0.246041	-0.0561048	0.460429	0.0502088	0.999929	0.105938	0.0935276
lavaan_mediation_preBEP_meta_vamspn56e_muac6.csv	preBEP	infant vams	vam_1005685	pn56e	muac	6	230	-0.631524	-1.36626	-0.192456	0.0353065	3.35077	0.185771	6.40492	0.0234113	2.71925	-0.384538	5.50653	0.0575039	0.999726	0.101791	0.0957848
lavaan_mediation_preBEP_meta_vamspn12e_hc2.csv	preBEP	infant vams	vam_1006527	pn12e	hc	2	280	-0.203272	-0.657742	-0.00031615	0.207579	4.20489	0.480679	7.50709	0.0118378	4.00162	0.344316	7.23795	0.0173633	0.999891	0.0201406	0.0193013
lavaan_mediation_preBEP_meta_vamspn34e_height4.csv	preBEP	infant vams	vam_1006552	pn34e	height	4	279	-0.160949	-0.330721	-0.0118129	0.0619006	0.70319	0.0690721	1.44471	0.033108	0.542241	-0.0847015	1.27278	0.0940014	0.999948	0.108136	0.106157
lavaan_mediation_preBEP_meta_vamspn56e_hc7.csv	preBEP	infant vams	vam_1007189	pn56e	hc	7	211	-0.0591826	-0.168271	-0.000470851	0.152389	0.582255	0.155963	0.94677	0.00279611	0.523073	0.0307955	0.890959	0.00773987	0.999974	0.0149132	0.0144949
lavaan_mediation_preBEP_meta_vamspn56e_muac6.csv	preBEP	infant vams	vam_1007189	pn56e	muac	6	230	-0.502258	-1.33511	-0.00176131	0.125553	3.22151	0.138837	6.38848	0.0330373	2.71925	-0.340804	5.99373	0.0738849	0.999726	0.101791	0.0957848
lavaan_mediation_preBEP_meta_vamspn34e_muac5.csv	preBEP	infant vams	vam_1007266	pn34e	muac	5	271	-0.478203	-1.07993	-0.0311875	0.0643742	3.90278	0.915872	6.26757	0.00495773	3.42458	0.358835	5.79208	0.0131831	0.998723	0.0296555	0.0271299
lavaan_mediation_preBEP_meta_vamspn34e_muac6.csv	preBEP	infant vams	vam_1007266	pn34e	muac	6	231	-0.670871	-1.4702	-0.0966968	0.062841	3.28669	0.565765	6.33417	0.0281624	2.61582	-0.0786139	5.71998	0.0863002	0.999802	0.126674	0.110796
lavaan_mediation_preBEP_meta_vamspn12e_waz4.csv	preBEP	infant vams	vam_1007892	pn12e	waz	4	276	-0.0066914	-0.0508326	-0.000132171	0.568964	0.326616	0.0277247	0.571632	0.00918663	0.319924	0.0274287	0.544117	0.00951075	0.999876	0.0157355	0.014171
lavaan_mediation_preBEP_meta_vamspn12e_hc4.csv	preBEP	infant vams	vam_1008025	pn12e	hc	4	277	-0.546417	-1.30808	-0.0367023	0.0707234	4.48993	1.11463	8.0474	0.00573646	3.94351	0.515502	7.23341	0.0144156	0.999539	0.0294039	0.028137
lavaan_mediation_preBEP_meta_vamspn34e_hc4.csv	preBEP	infant vams	vam_1008475	pn34e	hc	4	279	-0.517704	-1.36534	-0.0390754	0.139856	4.47368	1.39664	7.57453	0.00266893	3.95597	0.952226	6.91631	0.00809914	0.999838	0.0315799	0.0281731
lavaan_mediation_preBEP_meta_vamspn12e_muac2.csv	preBEP	infant vams	vam_1008665	pn12e	muac	2	280	-0.597262	-1.32097	-0.0105226	0.0831891	4.46355	1.94743	6.73387	0.00025393	3.86629	1.3268	5.79607	0.00124932	0.999992	0.000801587	0.00129442
lavaan_mediation_preBEP_meta_vamspn34e_haz5.csv	preBEP	infant vams	vam_1008679	pn34e	haz	5	271	-0.0616955	-0.118554	-0.00599606	0.0321649	0.26955	0.0305741	0.52617	0.0495282	0.207854	-0.0344095	0.484956	0.133707	0.999832	0.205175	0.191026
lavaan_mediation_preBEP_meta_vamspn12e_whz4.csv	preBEP	infant vams	vam_1009043	pn12e	whz	4	277	-0.050867	-0.103153	-0.0161086	0.0245933	0.327464	0.0435404	0.628902	0.0219228	0.276597	-0.000167242	0.582854	0.0458554	0.999669	0.0627933	0.0541655
lavaan_mediation_preBEP_meta_vamspn34e_weight4.csv	preBEP	infant vams	vam_1009085	pn34e	weight	4	279	-0.0160801	-0.0376999	-0.00176765	0.0770366	0.338891	0.151928	0.567962	0.001299	0.322811	0.150406	0.559636	0.00182661	0.999939	0.00420937	0.00354385
lavaan_mediation_preBEP_meta_vamspn34e_weight5.csv	preBEP	infant vams	vam_1009085	pn34e	weight	5	271	-0.0220149	-0.048749	-0.00493143	0.0420408	0.282623	0.0630461	0.488537	0.0121055	0.260608	0.0570296	0.45171	0.0181336	0.999777	0.0302954	0.025723
lavaan_mediation_preBEP_meta_vamspn34e_whz4.csv	preBEP	infant vams	vam_1009085	pn34e	whz	4	279	-0.0257785	-0.0563547	-0.00444706	0.0700555	0.314313	0.0503211	0.590522	0.0270152	0.288535	0.0208394	0.546436	0.0372862	0.909688	0.0730124	0.0488746
lavaan_mediation_preBEP_meta_vamspn12e_hc2.csv	preBEP	infant vams	vam_1009321	pn12e	hc	2	280	-0.591543	-1.30037	-0.0461979	0.0605454	4.59316	1.73489	7.85463	0.0043088	4.00162	1.39315	7.22622	0.0120584	0.999891	0.0201406	0.0187671
lavaan_mediation_preBEP_meta_vamspn12e_hc3.csv	preBEP	infant vams	vam_1009321	pn12e	hc	3	279	-0.528642	-1.44198	-0.0749665	0.115783	4.4928	1.32228	8.2274	0.0131063	3.96415	0.782004	7.72171	0.028645	0.999812	0.024818	0.0292748
lavaan_mediation_preBEP_meta_vamspn12e_muac2.csv	preBEP	infant vams	vam_1009321	pn12e	muac	2	280	-0.48428	-1.09479	-0.0127384	0.0750237	4.35057	1.94219	6.9968	0.000567325	3.86629	1.46146	6.33561	0.00191093	0.999992	0.000850748	0.00191879
lavaan_mediation_preBEP_meta_vamspn12e_muac3.csv	preBEP	infant vams	vam_1009321	pn12e	muac	3	279	-0.580255	-1.47529	-0.108905	0.0899066	4.3547	1.86582	7.06451	0.000956103	3.77445	1.45636	6.30133	0.00290741	0.999246	0.00487738	0.00468087
lavaan_mediation_preBEP_meta_vamspn12e_muac4.csv	preBEP	infant vams	vam_1009321	pn12e	muac	4	277	-0.541817	-1.19442	-0.0581793	0.0718492	4.33271	1.87099	6.76926	0.000581202	3.79089	1.30277	6.17322	0.00218796	0.999838	0.00940488	0.0087033
lavaan_mediation_preBEP_meta_vamspn12e_whz2.csv	preBEP	infant vams	vam_1009321	pn12e	whz	2	280	-0.0556756	-0.104819	-0.000720418	0.0402056	0.302555	0.00428229	0.566559	0.0295968	0.246879	-0.0527477	0.52719	0.0866948	0.999963	0.129337	0.121984
lavaan_mediation_preBEP_meta_vamspn34e_hc4.csv	preBEP	infant vams	vam_1010306	pn34e	hc	4	279	-0.848203	-1.86528	-0.144459	0.0462705	4.80418	1.42708	7.69598	0.00189566	3.95597	0.886075	7.0889	0.00939416	0.999838	0.0315799	0.0281731
lavaan_mediation_preBEP_meta_vamspn34e_hc5.csv	preBEP	infant vams	vam_1010306	pn34e	hc	5	271	-0.741859	-1.54144	-0.0915345	0.065743	4.85408	1.72617	8.23077	0.00446471	4.11222	0.840058	7.38491	0.0160591	0.999941	0.0320006	0.0279185
lavaan_mediation_preBEP_meta_vamspn34e_muac4.csv	preBEP	infant vams	vam_1010306	pn34e	muac	4	279	-0.760483	-1.6669	-0.190825	0.0360524	4.54185	2.0096	7.15811	0.00112964	3.78137	1.01811	6.41283	0.00591184	0.999931	0.0115237	0.0103065
lavaan_mediation_preBEP_meta_vamspn34e_muac5.csv	preBEP	infant vams	vam_1010306	pn34e	muac	5	271	-0.770873	-1.69626	-0.239769	0.0623958	4.19545	1.75476	6.89497	0.00228154	3.42458	0.560479	6.3766	0.0158526	0.998723	0.0296555	0.0271299
lavaan_mediation_preBEP_meta_vamspn34e_muac6.csv	preBEP	infant vams	vam_1010306	pn34e	muac	6	231	-1.01396	-2.23229	-0.216056	0.0444407	3.62979	0.953356	6.59291	0.0133587	2.61582	-0.155331	5.81817	0.0850234	0.999802	0.126674	0.110796
lavaan_mediation_preBEP_meta_vamspn34e_waz4.csv	preBEP	infant vams	vam_1010306	pn34e	waz	4	278	-0.0762183	-0.14477	-0.0282019	0.0150878	0.389883	0.164437	0.667358	0.00125126	0.313665	0.0838649	0.567259	0.0104884	0.999988	0.0212479	0.0178855
lavaan_mediation_preBEP_meta_vamspn34e_waz5.csv	preBEP	infant vams	vam_1010306	pn34e	waz	5	270	-0.0744611	-0.135293	-0.0191338	0.0148278	0.315482	0.0824797	0.580534	0.0148996	0.241021	-0.00934113	0.518479	0.0643763	0.999923	0.0816719	0.071017
lavaan_mediation_preBEP_meta_vamspn34e_waz6.csv	preBEP	infant vams	vam_1010306	pn34e	waz	6	231	-0.0901333	-0.194104	-0.0146141	0.0406217	0.292308	0.0521308	0.553887	0.0218736	0.202175	-0.0376806	0.44174	0.114251	0.999781	0.215764	0.181277
lavaan_mediation_preBEP_meta_vamspn34e_weight4.csv	preBEP	infant vams	vam_1010306	pn34e	weight	4	279	-0.0614988	-0.134375	-0.0164249	0.026966	0.38431	0.195627	0.581595	0.000160027	0.322811	0.103488	0.512776	0.00133037	0.999939	0.00420937	0.00354385
lavaan_mediation_preBEP_meta_vamspn34e_weight5.csv	preBEP	infant vams	vam_1010306	pn34e	weight	5	271	-0.0629865	-0.130116	-0.0174304	0.0356667	0.323595	0.124774	0.52484	0.00122492	0.260608	0.0697783	0.474568	0.0101749	0.999777	0.0302954	0.025723
lavaan_mediation_preBEP_meta_vamspn34e_weight6.csv	preBEP	infant vams	vam_1010306	pn34e	weight	6	231	-0.0813834	-0.181989	-0.0153241	0.046452	0.320298	0.102762	0.536199	0.00420456	0.238915	0.00390672	0.469556	0.0326695	0.999977	0.0871376	0.0696552
lavaan_mediation_preBEP_meta_vamspn34e_whz4.csv	preBEP	infant vams	vam_1010306	pn34e	whz	4	279	-0.0532682	-0.137654	-0.00845295	0.089769	0.341803	0.0773878	0.617769	0.0130311	0.288535	0.0475195	0.586197	0.0282349	0.909688	0.0730124	0.0488746
lavaan_mediation_preBEP_meta_vamspn34e_whz6.csv	preBEP	infant vams	vam_1010306	pn34e	whz	6	231	-0.0869425	-0.187309	-0.0161652	0.0464879	0.237697	0.0120577	0.523784	0.0659866	0.150755	-0.0733539	0.415942	0.256643	0.999768	0.374045	0.312728
lavaan_mediation_preBEP_meta_vamspn34e_waz5.csv	preBEP	infant vams	vam_1010824	pn34e	waz	5	270	0.033266	0.00259198	0.087378	0.104484	0.207755	0.00193433	0.465004	0.0881036	0.241021	0.0430566	0.490458	0.0473701	0.999923	0.0910437	0.071017
lavaan_mediation_preBEP_meta_vamspn56e_hc7.csv	preBEP	infant vams	vam_1011758	pn56e	hc	7	211	0.030842	0.00125524	0.0872632	0.152086	0.492231	0.0456068	0.80608	0.00928554	0.523073	0.0762649	0.865502	0.00581241	0.999974	0.0149132	0.0144949
lavaan_mediation_preBEP_meta_vamspn34e_hc4.csv	preBEP	infant vams	vam_1011804	pn34e	hc	4	279	-0.472902	-1.31587	-0.0214654	0.170736	4.42888	0.973308	7.49663	0.00843614	3.95597	0.616686	6.97226	0.0188429	0.999838	0.0315799	0.0281731
lavaan_mediation_preBEP_meta_vamspn56e_whz7.csv	preBEP	infant vams	vam_1011947	pn56e	whz	7	210	-0.0740239	-0.143355	-0.019296	0.0160612	0.40607	0.0844719	0.778631	0.0115121	0.332046	-0.0110203	0.704966	0.0404987	0.999985	0.0605031	0.0584881
lavaan_mediation_preBEP_meta_vamspn34e_whz4.csv	preBEP	infant vams	vam_1012943	pn34e	whz	4	279	-0.00824497	-0.0686511	-0.00190593	0.661743	0.29678	0.0238854	0.537727	0.0296219	0.288535	0.0134896	0.506788	0.0329187	0.999907	0.0730124	0.0488746
lavaan_mediation_preBEP_meta_vamspn34e_height4.csv	preBEP	infant vams	vam_1013985	pn34e	height	4	279	-0.105788	-0.255203	-0.00904776	0.111623	0.648029	0.0507636	1.33257	0.0368283	0.542241	-0.0240507	1.20532	0.0771718	0.999948	0.108136	0.106157
lavaan_mediation_preBEP_meta_vamspn34e_muac4.csv	preBEP	infant vams	vam_1015139	pn34e	muac	4	279	-0.0499964	-0.932681	-0.015388	0.825273	3.83136	1.13641	6.94531	0.0107468	3.78137	0.841454	6.82505	0.0114569	0.999931	0.0125315	0.0118989
lavaan_mediation_preBEP_meta_vamspn34e_waz4.csv	preBEP	infant vams	vam_1015535	pn34e	waz	4	278	0.0167422	0.0032628	0.0588637	0.187936	0.296922	0.0751992	0.498211	0.00890323	0.313665	0.103533	0.518088	0.00473886	0.999988	0.0212479	0.0178855
lavaan_mediation_preBEP_meta_vamspn34e_weight4.csv	preBEP	infant vams	vam_1015535	pn34e	weight	4	279	0.00993652	0.00485721	0.0408144	0.275691	0.312874	0.10795	0.512745	0.00176477	0.322811	0.116289	0.520649	0.00120666	0.999939	0.00420937	0.00354385
lavaan_mediation_preBEP_meta_vamspn34e_muac5.csv	preBEP	infant vams	vam_1016111	pn34e	muac	5	271	-0.400822	-1.21549	-0.0255427	0.174535	3.8254	0.961828	6.44147	0.00679397	3.42458	0.674366	5.89228	0.011241	0.998723	0.0296555	0.0271299
lavaan_mediation_preBEP_meta_vamspn34e_weight5.csv	preBEP	infant vams	vam_1016111	pn34e	weight	5	271	-0.0285826	-0.0905493	-0.000554691	0.198906	0.289191	0.0635013	0.508865	0.00560393	0.260608	0.0507815	0.473084	0.0102297	0.999777	0.0302954	0.025723
lavaan_mediation_preBEP_meta_vamspn34e_whz4.csv	preBEP	infant vams	vam_1016289	pn34e	whz	4	279	0.0376017	0.00346028	0.0960942	0.124248	0.250933	0.0225947	0.472146	0.0392693	0.288535	0.0491033	0.519463	0.0166534	0.909688	0.0730124	0.0488746
lavaan_mediation_preBEP_meta_vamspn56e_weight7.csv	preBEP	infant vams	vam_1016296	pn56e	weight	7	211	0.0328629	0.00701113	0.0980853	0.15181	0.397433	0.0874407	0.662905	0.00296028	0.430296	0.116215	0.660556	0.00107771	0.999898	0.00332	0.0028762
lavaan_mediation_preBEP_meta_vamsbirth_whz2.csv	preBEP	infant vams	vam_1016553	birth	whz	2	191	-0.104735	-0.208252	-0.00361926	0.0362622	0.410197	0.101986	0.792936	0.0196982	0.305462	0.0154509	0.649973	0.0675607	0.855872	0.156875	0.125748
lavaan_mediation_preBEP_meta_vamspn34e_height4.csv	preBEP	infant vams	vam_1016703	pn34e	height	4	279	-0.127734	-0.313578	-0.000739155	0.125907	0.669975	0.0532775	1.3461	0.0380718	0.542241	-0.113843	1.16161	0.0908902	0.999948	0.108136	0.106157
lavaan_mediation_preBEP_meta_vamspn12e_waz4.csv	preBEP	infant vams	vam_1016797	pn12e	waz	4	276	0.0445053	0.0026066	0.108605	0.114119	0.275419	0.0359481	0.527503	0.0276085	0.319924	0.0750265	0.570004	0.00790547	0.999876	0.0277221	0.014171
lavaan_mediation_preBEP_meta_vamspn12e_weight4.csv	preBEP	infant vams	vam_1017495	pn12e	weight	4	277	-0.0330324	-0.0907325	-0.0010061	0.18193	0.350586	0.171273	0.553651	0.000257741	0.317553	0.137098	0.52189	0.000811275	0.999982	0.00285305	0.00261558
lavaan_mediation_preBEP_meta_vamspn12e_whz4.csv	preBEP	infant vams	vam_1017495	pn12e	whz	4	277	-0.047643	-0.141217	-0.00129588	0.169117	0.32424	0.0399459	0.669956	0.021466	0.276597	-0.0117663	0.549981	0.0477297	0.999669	0.0627933	0.0541655
lavaan_mediation_preBEP_meta_vamspn12e_hc3.csv	preBEP	infant vams	vam_1017889	pn12e	hc	3	279	-0.708028	-1.60954	-0.0480685	0.0781265	4.67218	1.22023	8.20041	0.00542504	3.96415	0.698205	7.2101	0.0135635	0.999812	0.024818	0.0243527
lavaan_mediation_preBEP_meta_vamspn34e_muac4.csv	preBEP	infant vams	vam_1019129	pn34e	muac	4	279	-0.488853	-1.03201	-0.0589575	0.0627533	4.27022	1.87178	6.95356	0.00101016	3.78137	1.18995	6.48457	0.00440243	0.999931	0.0115237	0.0103065
lavaan_mediation_preBEP_meta_vamspn34e_height6.csv	preBEP	infant vams	vam_1020134	pn34e	height	6	231	-0.106431	-0.25672	-0.00196802	0.100411	0.647859	0.0573804	1.24253	0.023664	0.541427	-0.0593955	1.13465	0.061599	0.999938	0.160218	0.137233
lavaan_mediation_preBEP_meta_vamspn34e_hc5.csv	preBEP	infant vams	vam_1020317	pn34e	hc	5	271	0.431861	0.0261979	1.13597	0.136858	3.68036	0.256612	7.28777	0.045878	4.11222	0.594203	7.95128	0.0265713	0.999941	0.0463081	0.028881
lavaan_mediation_preBEP_meta_vamspn34e_muac5.csv	preBEP	infant vams	vam_1020317	pn34e	muac	5	271	0.491407	0.040023	1.3223	0.122574	2.93317	0.449026	5.67712	0.0382041	3.42458	0.708593	6.28629	0.0167849	0.998723	0.0388456	0.0271299
lavaan_mediation_preBEP_meta_vamspn12e_waz3.csv	preBEP	infant vams	vam_1021160	pn12e	waz	3	279	-0.0309673	-0.0778964	-8.36262e-05	0.134314	0.399727	0.138019	0.652559	0.00223192	0.368759	0.109398	0.601064	0.00348643	0.999856	0.00389786	0.00392479
lavaan_mediation_preBEP_meta_vamspn12e_whz3.csv	preBEP	infant vams	vam_1021160	pn12e	whz	3	279	-0.0557858	-0.127865	-0.000128465	0.0685499	0.301827	0.0135957	0.551702	0.0237289	0.246041	-0.065468	0.503194	0.0703604	0.999929	0.105938	0.0935276
lavaan_mediation_preBEP_meta_vamspn12e_whz4.csv	preBEP	infant vams	vam_1021160	pn12e	whz	4	277	-0.0496805	-0.118009	-0.00497307	0.108575	0.326277	0.107159	0.60472	0.0075773	0.276597	0.0654455	0.545119	0.0255446	0.999669	0.0627933	0.0541655
lavaan_mediation_preBEP_meta_vamspn12e_height3.csv	preBEP	infant vams	vam_1021745	pn12e	height	3	279	-0.0799549	-0.179062	-0.00220726	0.102348	0.762355	0.12599	1.37745	0.0115809	0.6824	0.0560331	1.33018	0.0242294	0.999887	0.0409806	0.0375986
lavaan_mediation_preBEP_meta_vamspn12e_height4.csv	preBEP	infant vams	vam_1021745	pn12e	height	4	277	-0.104228	-0.220612	-0.00480736	0.0479221	0.666758	0.119116	1.29256	0.0236809	0.562529	0.00347504	1.16973	0.0566456	0.999839	0.0956366	0.0885058
lavaan_mediation_preBEP_meta_vamspn34e_whz4.csv	preBEP	infant vams	vam_1022239	pn34e	whz	4	279	0.0337912	0.00579587	0.0834568	0.103054	0.254743	0.0132205	0.551841	0.0676957	0.288535	0.0440922	0.597181	0.0418185	0.909688	0.075552	0.0488746
lavaan_mediation_preBEP_meta_vamspn34e_muac5.csv	preBEP	infant vams	vam_1022465	pn34e	muac	5	271	0.517527	0.0851546	1.34028	0.106074	2.90705	0.0120511	5.55299	0.0348118	3.42458	0.614199	6.12968	0.0132032	0.998723	0.0360391	0.0271299
lavaan_mediation_preBEP_meta_vamspn12e_hc3.csv	preBEP	infant vams	vam_1023091	pn12e	hc	3	279	-0.119584	-0.919279	-0.00547163	0.610454	4.08374	0.735714	7.55149	0.0142964	3.96415	0.542062	7.41721	0.0182661	0.999812	0.024818	0.0243527
lavaan_mediation_preBEP_meta_vamspn12e_hc4.csv	preBEP	infant vams	vam_1023091	pn12e	hc	4	277	-0.127972	-1.11718	-0.0124226	0.650575	4.07148	0.406091	7.31334	0.0176622	3.94351	0.0754626	7.00845	0.0202397	0.999539	0.0294039	0.028137
lavaan_mediation_preBEP_meta_vamspn12e_hc3.csv	preBEP	infant vams	vam_1023138	pn12e	hc	3	279	-0.530075	-1.40332	-0.0167511	0.140899	4.49423	1.26713	7.81608	0.0054053	3.96415	0.627152	7.60555	0.0180367	0.999812	0.024818	0.0243527
lavaan_mediation_preBEP_meta_vamspn12e_muac4.csv	preBEP	infant vams	vam_1023252	pn12e	muac	4	277	0.490577	0.0390644	1.24732	0.132408	3.30032	0.53074	5.9021	0.0143127	3.79089	1.10465	6.53895	0.0050131	0.999838	0.0144588	0.0087033
lavaan_mediation_preBEP_meta_vamspn12e_weight4.csv	preBEP	infant vams	vam_1023252	pn12e	weight	4	277	0.0385667	0.00393923	0.0973628	0.102892	0.278987	0.0890838	0.477769	0.0027784	0.317553	0.10387	0.53381	0.00126587	0.999982	0.00320151	0.00261558
lavaan_mediation_preBEP_meta_vamspn12e_muac4.csv	preBEP	infant vams	vam_1028245	pn12e	muac	4	277	0.520642	0.0505769	1.51426	0.147159	3.27025	0.313359	5.81465	0.0170541	3.79089	0.882679	6.53177	0.00728016	0.999838	0.0171067	0.00881568
lavaan_mediation_preBEP_meta_vamspn12e_muac2.csv	preBEP	infant vams	vam_1029340	pn12e	muac	2	280	-0.295131	-0.777283	-0.00154147	0.149247	4.16142	1.75772	6.3281	0.000189602	3.86629	1.46068	6.06693	0.000430021	0.999992	0.000801587	0.000831502
lavaan_mediation_preBEP_meta_vamspn34e_muac4.csv	preBEP	infant vams	vam_1030006	pn34e	muac	4	279	-0.407714	-1.01872	-0.00365105	0.118096	4.18908	1.7208	6.83722	0.00164971	3.78137	1.3687	6.211	0.00456424	0.999931	0.0115237	0.0103065
lavaan_mediation_preBEP_meta_vamspn34e_muac6.csv	preBEP	infant vams	vam_1030006	pn34e	muac	6	231	-0.418822	-1.13897	-0.00581047	0.142279	3.03464	0.139511	6.11248	0.0386695	2.61582	-0.273524	5.67944	0.0724909	0.999802	0.126674	0.110796
lavaan_mediation_preBEP_meta_vamspn12e_hc2.csv	preBEP	infant vams	vam_1030068	pn12e	hc	2	280	0.446887	0.000741585	1.08341	0.132591	3.55473	0.297777	6.23978	0.0201883	4.00162	0.522829	6.50592	0.00815406	0.999891	0.022177	0.0187671
lavaan_mediation_preBEP_meta_vamspn12e_waz3.csv	preBEP	infant vams	vam_1030068	pn12e	waz	3	279	0.0289845	0.00132047	0.0771723	0.129494	0.339775	0.0936572	0.57462	0.00309799	0.368759	0.145984	0.598323	0.00136351	0.999856	0.00399115	0.00353897
lavaan_mediation_preBEP_meta_vamspn12e_waz4.csv	preBEP	infant vams	vam_1030068	pn12e	waz	4	276	0.0241333	0.000837286	0.0694291	0.181575	0.295791	0.0179411	0.53315	0.0236984	0.319924	0.0462409	0.559613	0.0128474	0.999876	0.0239934	0.0145849
lavaan_mediation_preBEP_meta_vamspn12e_hc2.csv	preBEP	infant vams	vam_1033381	pn12e	hc	2	280	0.18279	0.00110839	0.417803	0.0866939	3.81883	0.796869	7.3549	0.0226128	4.00162	0.951653	7.44008	0.0165406	0.999891	0.0239756	0.0190436
lavaan_mediation_preBEP_meta_vamspn12e_muac2.csv	preBEP	infant vams	vam_1033381	pn12e	muac	2	280	0.24136	0.00619391	0.49216	0.0405673	3.62493	1.51382	5.62764	0.000915666	3.86629	1.65442	5.98692	0.000525033	0.999992	0.00103676	0.000831502
lavaan_mediation_preBEP_meta_vamspn12e_hc4.csv	preBEP	infant vams	vam_1033642	pn12e	hc	4	277	-0.545582	-1.37965	-0.0421684	0.113748	4.48909	0.430047	7.2938	0.00934599	3.94351	0.0430312	7.0297	0.0209346	0.999539	0.0294039	0.028137
lavaan_mediation_preBEP_meta_vamspn12e_muac3.csv	preBEP	infant vams	vam_1033642	pn12e	muac	3	279	-0.381552	-0.863341	-0.0343269	0.076521	4.156	1.3759	6.19226	0.000695524	3.77445	0.711328	5.75053	0.00225654	0.999246	0.00487738	0.00468087
lavaan_mediation_preBEP_meta_vamspn34e_haz5.csv	preBEP	infant vams	vam_1033808	pn34e	haz	5	271	-0.0532722	-0.118618	-0.00394261	0.0710962	0.261127	0.000184115	0.563103	0.0540054	0.207854	-0.0381191	0.5145	0.121797	0.999832	0.205175	0.191026
lavaan_mediation_preBEP_meta_vamspn34e_hc4.csv	preBEP	infant vams	vam_1033808	pn34e	hc	4	279	-0.443545	-1.30416	-0.0109706	0.164805	4.39952	1.31083	7.27734	0.00490226	3.95597	0.752027	6.87536	0.0100048	0.999838	0.0315799	0.0281731
lavaan_mediation_preBEP_meta_vamspn34e_hc5.csv	preBEP	infant vams	vam_1033808	pn34e	hc	5	271	-0.458664	-1.16385	-0.000664035	0.138203	4.57088	0.998233	8.39763	0.0105561	4.11222	0.189925	7.92443	0.0212129	0.999941	0.0320006	0.0279185
lavaan_mediation_preBEP_meta_vamspn34e_height4.csv	preBEP	infant vams	vam_1033808	pn34e	height	4	279	-0.144787	-0.28042	-0.0152868	0.0379982	0.687027	0.0534208	1.27396	0.0222253	0.542241	-0.114813	1.18608	0.0806737	0.999948	0.108136	0.106157
lavaan_mediation_preBEP_meta_vamspn34e_height5.csv	preBEP	infant vams	vam_1033808	pn34e	height	5	271	-0.103622	-0.223704	-0.00504917	0.0709446	0.698957	0.144381	1.40393	0.023758	0.595335	0.0167529	1.23432	0.052807	0.999367	0.0930636	0.0849576
lavaan_mediation_preBEP_meta_vamspn34e_height6.csv	preBEP	infant vams	vam_1033808	pn34e	height	6	231	-0.148976	-0.322175	-0.00823659	0.0647607	0.690403	0.0461246	1.35939	0.0396108	0.541427	-0.0838845	1.21764	0.106934	0.999938	0.160218	0.137233
lavaan_mediation_preBEP_meta_vamspn12e_whz3.csv	preBEP	infant vams	vam_1035179	pn12e	whz	3	279	-0.0539068	-0.0933589	-0.00729985	0.0171485	0.299948	0.0250197	0.544004	0.0282481	0.246041	-0.0113644	0.490742	0.0710275	0.999929	0.105938	0.0935276
lavaan_mediation_preBEP_meta_vamspn12e_whz4.csv	preBEP	infant vams	vam_1035179	pn12e	whz	4	277	-0.0633733	-0.119216	-0.00595083	0.0453252	0.33997	0.0724256	0.620552	0.013413	0.276597	0.000832259	0.53057	0.04504	0.999669	0.0627933	0.0541655
lavaan_mediation_preBEP_meta_vamspn34e_muac4.csv	preBEP	infant vams	vam_1035969	pn34e	muac	4	279	-0.502265	-1.27722	-0.0649799	0.119112	4.28363	1.74076	7.11867	0.000897609	3.78137	1.46272	6.21779	0.00215575	0.999931	0.0115237	0.0103065
lavaan_mediation_preBEP_meta_vamspn12e_weight4.csv	preBEP	infant vams	vam_1036208	pn12e	weight	4	277	-0.0251627	-0.0632309	-0.000239907	0.137357	0.342716	0.166873	0.542419	0.00059452	0.317553	0.155919	0.520676	0.00141749	0.999982	0.00285305	0.00261558
lavaan_mediation_preBEP_meta_vamspn34e_hc4.csv	preBEP	infant vams	vam_1036597	pn34e	hc	4	279	-0.370045	-0.851156	-0.0458391	0.0971789	4.32602	1.08695	8.13986	0.0188654	3.95597	0.701838	7.57914	0.0300851	0.999838	0.0315799	0.0311458
lavaan_mediation_preBEP_meta_vamspn34e_height5.csv	preBEP	infant vams	vam_1036597	pn34e	height	5	271	-0.0451188	-0.121112	-0.00574416	0.138989	0.640454	0.0598494	1.25179	0.0358017	0.595335	0.0499697	1.21215	0.0505235	0.999367	0.0930636	0.0849576
lavaan_mediation_preBEP_meta_vamspn12e_hc4.csv	preBEP	infant vams	vam_1037268	pn12e	hc	4	277	-0.323014	-1.00498	-0.00185699	0.224381	4.26652	1.05192	7.98133	0.0124462	3.94351	0.747802	7.49587	0.0224062	0.999539	0.0294039	0.028137
lavaan_mediation_preBEP_meta_vamspn34e_whz4.csv	preBEP	infant vams	vam_1038175	pn34e	whz	4	279	0.0282378	4.08366e-05	0.0758569	0.161382	0.260297	0.0347073	0.48163	0.0378985	0.288535	0.053342	0.521881	0.0248459	0.909688	0.0730124	0.0488746
lavaan_mediation_preBEP_meta_vamspn12e_hc2.csv	preBEP	infant vams	vam_1038339	pn12e	hc	2	280	-0.339864	-0.827212	-0.00226032	0.127027	4.34149	1.0618	7.74046	0.0086619	4.00162	0.654381	7.44625	0.0147622	0.999891	0.0201406	0.0187671
lavaan_mediation_preBEP_meta_vamspn12e_hc3.csv	preBEP	infant vams	vam_1038339	pn12e	hc	3	279	-0.529417	-1.12062	-0.0486388	0.0495635	4.49357	1.08095	7.40953	0.00419083	3.96415	0.783739	6.97937	0.0106425	0.999812	0.024818	0.0243527
lavaan_mediation_preBEP_meta_vamspn12e_hc4.csv	preBEP	infant vams	vam_1038339	pn12e	hc	4	277	-0.556298	-1.07713	-0.0710202	0.031041	4.49981	0.907962	8.15492	0.00915381	3.94351	0.494639	7.39609	0.0229596	0.999539	0.0294039	0.028137
lavaan_mediation_preBEP_meta_vamspn12e_hc3.csv	preBEP	infant vams	vam_1039807	pn12e	hc	3	279	-0.57416	-1.49094	-0.0291912	0.128021	4.53831	1.35107	7.72688	0.00524701	3.96415	0.623219	7.14278	0.0165627	0.999812	0.024818	0.0243527
lavaan_mediation_preBEP_meta_vamspn12e_hc4.csv	preBEP	infant vams	vam_1039807	pn12e	hc	4	277	-0.589094	-1.42639	-0.0384981	0.104355	4.5326	0.896373	8.21362	0.00741926	3.94351	0.481933	7.53034	0.0221051	0.999539	0.0294039	0.028137
lavaan_mediation_preBEP_meta_vamspn12e_muac4.csv	preBEP	infant vams	vam_1041607	pn12e	muac	4	277	0.550682	0.106017	1.2027	0.0527387	3.24021	0.652319	6.37292	0.0164706	3.79089	0.966492	6.62114	0.00420746	0.999838	0.0165554	0.0087033
lavaan_mediation_preBEP_meta_vamspn12e_waz3.csv	preBEP	infant vams	vam_1041607	pn12e	waz	3	279	0.0472875	0.0058126	0.103867	0.0822136	0.321472	0.0919222	0.574231	0.00596229	0.368759	0.121202	0.625672	0.00178195	0.999856	0.00611259	0.00353897
lavaan_mediation_preBEP_meta_vamspn12e_waz4.csv	preBEP	infant vams	vam_1041607	pn12e	waz	4	276	0.0537156	0.00384733	0.124469	0.076546	0.266209	0.0205337	0.491469	0.0285526	0.319924	0.0556376	0.543508	0.0085642	0.999876	0.0286406	0.014171
lavaan_mediation_preBEP_meta_vamspn34e_whz4.csv	preBEP	infant vams	vam_1042620	pn34e	whz	4	279	0.0400845	0.00153155	0.108014	0.130642	0.24845	0.0103396	0.514124	0.056476	0.288535	0.0394656	0.5278	0.0216529	0.909688	0.0731365	0.0488746
lavaan_mediation_preBEP_meta_vamspn12e_muac2.csv	preBEP	infant vams	vam_1043363	pn12e	muac	2	280	0.306039	0.0115787	0.803421	0.144867	3.56025	1.18426	5.5827	0.00153846	3.86629	1.56404	5.86743	0.000521419	0.999992	0.00157559	0.000831502
lavaan_mediation_preBEP_meta_vamspn56e_haz7.csv	preBEP	infant vams	vam_1044250	pn56e	haz	7	210	-0.0671357	-0.1749	-0.00283708	0.126477	0.370455	0.0208759	0.687266	0.0274979	0.30332	-0.0476876	0.653274	0.0798115	0.999766	0.103816	0.0996811
lavaan_mediation_preBEP_meta_vamspn56e_height7.csv	preBEP	infant vams	vam_1044250	pn56e	height	7	211	-0.157668	-0.373116	-0.0114589	0.0838283	1.03415	0.298083	1.72318	0.00696503	0.876481	0.101944	1.60028	0.0236162	0.999993	0.0332223	0.0321695
lavaan_mediation_preBEP_meta_vamspn56e_hc7.csv	preBEP	infant vams	vam_2000327	pn56e	hc	7	211	-0.066145	-0.16189	-0.00461109	0.09928	0.589218	0.217628	0.989995	0.00307821	0.523073	0.153011	0.907978	0.00854985	0.999974	0.0149132	0.0144949
lavaan_mediation_preBEP_meta_vamspn56e_height7.csv	preBEP	infant vams	vam_2000327	pn56e	height	7	211	-0.14117	-0.32484	-0.0153221	0.07941	1.01765	0.298457	1.87742	0.00777815	0.876481	0.151595	1.73382	0.0215791	0.999993	0.0332223	0.0321695
lavaan_mediation_preBEP_meta_vamspn56e_height7.csv	preBEP	infant vams	vam_2000894	pn56e	height	7	211	-0.0482954	-0.134976	-0.00177629	0.139956	0.924776	0.20667	1.76745	0.0262373	0.876481	0.128707	1.71204	0.033357	0.999993	0.0332223	0.0348454
lavaan_mediation_preBEP_meta_vamspn56e_weight7.csv	preBEP	infant vams	vam_2000894	pn56e	weight	7	211	-0.0267742	-0.0795184	-0.00195877	0.144786	0.45707	0.144032	0.752883	0.00207576	0.430296	0.127489	0.713611	0.00325473	0.999898	0.00291803	0.0034575
lavaan_mediation_preBEP_meta_vamspn34e_muac4.csv	preBEP	infant vams	vam_2002348	pn34e	muac	4	279	-0.595038	-1.34303	-0.050068	0.0871415	4.37641	1.73447	7.44564	0.00209546	3.78137	1.06837	6.24534	0.00550059	0.999931	0.0115237	0.0103065
lavaan_mediation_preBEP_meta_vamspn34e_muac5.csv	preBEP	infant vams	vam_2002348	pn34e	muac	5	271	-0.572112	-1.38963	-0.00608782	0.0927634	3.99669	1.58828	6.95714	0.00520966	3.42458	0.716995	6.43688	0.0142644	0.998723	0.0296555	0.0271299
lavaan_mediation_preBEP_meta_vamspn34e_whz4.csv	preBEP	infant vams	vam_2002348	pn34e	whz	4	279	-0.043035	-0.100156	-0.00449231	0.0823878	0.33157	0.050356	0.632539	0.0259744	0.288535	0.019847	0.579844	0.0469338	0.909688	0.0730124	0.0495115
lavaan_mediation_preBEP_meta_vamspn34e_whz4.csv	preBEP	infant vams	vam_2003218	pn34e	whz	4	279	0.0362857	0.000339696	0.109654	0.183259	0.252249	0.000731617	0.495546	0.0612656	0.288535	0.0413298	0.523159	0.0278513	0.909688	0.0739529	0.0488746
lavaan_mediation_preBEP_meta_vamspn34e_waz4.csv	preBEP	infant vams	vam_2003279	pn34e	waz	4	278	-0.0422613	-0.104015	-5.98752e-05	0.103803	0.355926	0.117468	0.616094	0.00355935	0.313665	0.0682354	0.573268	0.0117927	0.999988	0.0212479	0.0178855
lavaan_mediation_preBEP_meta_vamspn34e_waz5.csv	preBEP	infant vams	vam_2003279	pn34e	waz	5	270	-0.0436503	-0.0910535	-0.00215205	0.0631592	0.284671	0.0397927	0.545573	0.0343501	0.241021	-0.0044734	0.51073	0.0701345	0.999923	0.0816719	0.0731656
lavaan_mediation_preBEP_meta_vamspn12e_hc3.csv	preBEP	infant vams	vam_2003623	pn12e	hc	3	279	0.181146	0.00380294	0.483285	0.131606	3.78301	0.673065	7.03252	0.0120717	3.96415	0.932392	7.12988	0.00753846	0.999812	0.024818	0.0243527
lavaan_mediation_preBEP_meta_vamspn12e_hc4.csv	preBEP	infant vams	vam_2003623	pn12e	hc	4	277	0.214627	0.00649345	0.60858	0.149539	3.72888	0.564652	7.27468	0.0342633	3.94351	0.685487	7.38804	0.0222576	0.999539	0.0352753	0.028137
lavaan_mediation_preBEP_meta_vamspn56e_hc7.csv	preBEP	infant vams	vam_2004030	pn56e	hc	7	211	0.0841267	0.0123039	0.194654	0.0853527	0.438946	0.0236474	0.850727	0.0285965	0.523073	0.110807	0.947484	0.0111099	0.999974	0.028625	0.0144949
lavaan_mediation_preBEP_meta_vamspn12e_weight2.csv	preBEP	infant vams	vam_2004036	pn12e	weight	2	280	0.0264677	0.000159495	0.0650984	0.10147	0.24606	0.0948895	0.443558	0.0032795	0.272528	0.12862	0.466469	0.00108823	0.999792	0.003293	0.001336
lavaan_mediation_preBEP_meta_vamspn12e_weight4.csv	preBEP	infant vams	vam_2004036	pn12e	weight	4	277	0.0301753	0.00202279	0.0682115	0.0920921	0.287378	0.0830927	0.456231	0.00301315	0.317553	0.110905	0.481404	0.000794419	0.999982	0.00334566	0.00261558
lavaan_mediation_preBEP_meta_vamspn12e_height2.csv	preBEP	infant vams	vam_2004073	pn12e	height	2	280	-0.123167	-0.305098	-0.0104715	0.0713433	0.751368	0.0872668	1.48416	0.0200481	0.628202	-0.00385128	1.32148	0.0489331	0.99989	0.0599691	0.0540256
lavaan_mediation_preBEP_meta_vamspn12e_muac2.csv	preBEP	infant vams	vam_2004073	pn12e	muac	2	280	-0.469196	-1.13707	-0.0372811	0.0825142	4.33549	2.19792	6.71907	0.000103817	3.86629	1.59949	6.3874	0.000542251	0.999992	0.000801587	0.000831502
lavaan_mediation_preBEP_meta_vamspn12e_weight2.csv	preBEP	infant vams	vam_2004073	pn12e	weight	2	280	-0.0289887	-0.0759809	-0.00159475	0.106331	0.301516	0.138092	0.45286	0.000109661	0.272528	0.121071	0.429369	0.000358586	0.999792	0.00131823	0.0012299
lavaan_mediation_preBEP_meta_vamspn12e_height2.csv	preBEP	infant vams	vam_2004369	pn12e	height	2	280	-0.119717	-0.284056	-0.0191864	0.10748	0.747918	0.181462	1.33864	0.0123993	0.628202	0.0339983	1.17482	0.0356989	0.99989	0.0599691	0.0536174
lavaan_mediation_preBEP_meta_vamspn12e_muac2.csv	preBEP	infant vams	vam_2004369	pn12e	muac	2	280	-0.451273	-0.973163	-0.101727	0.0568831	4.31756	1.6529	6.38241	0.000415404	3.86629	1.02977	6.01907	0.00212465	0.999992	0.000801587	0.0021312
lavaan_mediation_preBEP_meta_vamspn12e_muac3.csv	preBEP	infant vams	vam_2004369	pn12e	muac	3	279	-0.409788	-1.03862	-0.019168	0.108239	4.18424	1.73538	7.37092	0.00135271	3.77445	1.33203	6.92888	0.00392042	0.999246	0.00487738	0.00478074
lavaan_mediation_preBEP_meta_vamsbirth_muac2.csv	preBEP	infant vams	vam_2004583	birth	muac	2	191	-0.504011	-1.38298	-0.00376995	0.111789	3.54576	0.861431	6.92149	0.0215788	3.04175	0.331482	6.28156	0.0451705	0.903047	0.066138	0.048814
lavaan_mediation_preBEP_meta_vamspn34e_hc4.csv	preBEP	infant vams	vam_2005095	pn34e	hc	4	279	-0.557769	-1.18705	-0.0162372	0.063966	4.51374	0.776152	7.79185	0.0120204	3.95597	0.314598	7.21269	0.0271682	0.999838	0.0315799	0.0290723
lavaan_mediation_preBEP_meta_vamspn34e_muac5.csv	preBEP	infant vams	vam_2005095	pn34e	muac	5	271	-0.548992	-1.41446	-0.0336806	0.0908055	3.97357	1.1665	6.59881	0.00481773	3.42458	0.672871	6.08462	0.0123658	0.998723	0.0296555	0.0271299
lavaan_mediation_preBEP_meta_vamspn34e_hc4.csv	preBEP	infant vams	vam_2005361	pn34e	hc	4	279	-0.459034	-1.24658	-0.037227	0.116759	4.41501	1.05807	7.33561	0.00334259	3.95597	0.604126	6.91148	0.007567	0.999838	0.0315799	0.0281731
lavaan_mediation_preBEP_meta_vamspn34e_muac4.csv	preBEP	infant vams	vam_2005361	pn34e	muac	4	279	-0.416114	-1.08556	-0.0423518	0.111334	4.19748	1.42154	6.99852	0.0027104	3.78137	1.21937	6.61584	0.00558923	0.999931	0.0115237	0.0103065
lavaan_mediation_preBEP_meta_vamspn12e_muac2.csv	preBEP	infant vams	vam_2005414	pn12e	muac	2	280	0.384082	0.0181719	0.935189	0.0805043	3.48221	1.21493	5.86532	0.00138153	3.86629	1.61064	6.0862	0.000257454	0.999992	0.00142685	0.000831502
lavaan_mediation_preBEP_meta_vamspn12e_muac3.csv	preBEP	infant vams	vam_2005414	pn12e	muac	3	279	0.469634	0.0238557	1.10643	0.0794096	3.30481	0.602668	5.61129	0.0103912	3.77445	1.21366	6.01082	0.00258004	0.999246	0.0104125	0.00468087
lavaan_mediation_preBEP_meta_vamspn12e_waz2.csv	preBEP	infant vams	vam_2005546	pn12e	waz	2	280	-0.0408273	-0.10034	-0.00306069	0.097222	0.41526	0.142047	0.671199	0.000975702	0.374433	0.1332	0.596762	0.00172121	0.999769	0.00322226	0.00307962
lavaan_mediation_preBEP_meta_vamspn12e_waz3.csv	preBEP	infant vams	vam_2005546	pn12e	waz	3	279	-0.0407463	-0.105999	-0.000541212	0.107234	0.409506	0.154453	0.625387	0.000833537	0.368759	0.111	0.583539	0.00175421	0.999856	0.00389786	0.00353897
lavaan_mediation_preBEP_meta_vamspn12e_weight2.csv	preBEP	infant vams	vam_2005546	pn12e	weight	2	280	-0.0254312	-0.0662808	-0.000899675	0.104537	0.297959	0.143724	0.458147	0.000222045	0.272528	0.124351	0.436822	0.000511144	0.999792	0.00131823	0.0012299
lavaan_mediation_preBEP_meta_vamspn56e_waz7.csv	preBEP	infant vams	vam_2005961	pn56e	waz	7	210	-0.083917	-0.188874	-0.0187317	0.0647849	0.51183	0.16476	0.840864	0.00211816	0.427913	0.0545674	0.75578	0.0119878	0.999825	0.0114182	0.0126545
lavaan_mediation_preBEP_meta_vamspn56e_weight7.csv	preBEP	infant vams	vam_2005961	pn56e	weight	7	211	-0.0625642	-0.137428	-0.00574696	0.0761247	0.49286	0.20709	0.712859	0.0001095	0.430296	0.139496	0.661836	0.000742058	0.999898	0.00283617	0.0028762
lavaan_mediation_preBEP_meta_vamspn56e_whz7.csv	preBEP	infant vams	vam_2005961	pn56e	whz	7	210	-0.0903523	-0.207517	-0.0193015	0.0512698	0.422398	0.0772306	0.723193	0.00988705	0.332046	-0.00753236	0.637831	0.0451331	0.999985	0.0605031	0.0584881
lavaan_mediation_preBEP_meta_vamspn12e_hc3.csv	preBEP	infant vams	vam_2005992	pn12e	hc	3	279	-0.500141	-1.16824	-0.0182786	0.102587	4.4643	0.747073	8.01081	0.0172526	3.96415	0.136723	7.30518	0.0321907	0.999812	0.024818	0.0324903
lavaan_mediation_preBEP_meta_vamspn12e_hc3.csv	preBEP	infant vams	vam_2006912	pn12e	hc	3	279	-0.43856	-1.13967	-0.0279346	0.148319	4.40271	0.248803	7.42166	0.0074396	3.96415	-0.611817	6.91028	0.0166131	0.999812	0.024818	0.0243527
lavaan_mediation_preBEP_meta_vamspn34e_weight5.csv	preBEP	infant vams	vam_2007265	pn34e	weight	5	271	0.0368921	0.00235561	0.0925245	0.144147	0.223716	0.00748049	0.429465	0.0432807	0.260608	0.0417999	0.466484	0.017182	0.999777	0.0435052	0.025723
lavaan_mediation_preBEP_meta_vamspn34e_whz4.csv	preBEP	infant vams	vam_2007339	pn34e	whz	4	279	0.0272733	0.00222743	0.0727057	0.14671	0.261261	0.0285089	0.527482	0.0463999	0.288535	0.0431413	0.562315	0.0257334	0.909688	0.0730124	0.0488746
lavaan_mediation_preBEP_meta_vamspn12e_hc2.csv	preBEP	infant vams	vam_2007586	pn12e	hc	2	280	-0.557665	-1.23533	-0.062935	0.0808325	4.55929	1.17712	7.63225	0.00461261	4.00162	0.785102	6.67337	0.0101152	0.999891	0.0201406	0.0187671
lavaan_mediation_preBEP_meta_vamspn12e_hc3.csv	preBEP	infant vams	vam_2007586	pn12e	hc	3	279	-0.517991	-1.31037	-0.0249437	0.101046	4.48215	0.7859	7.61003	0.00759989	3.96415	0.425164	7.24359	0.016819	0.999812	0.024818	0.0243527
lavaan_mediation_preBEP_meta_vamspn12e_hc4.csv	preBEP	infant vams	vam_2007586	pn12e	hc	4	277	-0.534642	-1.48008	-0.0306946	0.131245	4.47815	0.704581	8.01191	0.0154976	3.94351	0.628185	7.47303	0.0259137	0.999539	0.0294039	0.028708
lavaan_mediation_preBEP_meta_vamspn34e_muac4.csv	preBEP	infant vams	vam_2008190	pn34e	muac	4	279	0.425082	0.0171669	0.906594	0.0697446	3.35629	0.568751	6.1423	0.0132799	3.78137	0.460819	6.74401	0.00510308	0.999931	0.0141254	0.0103065
lavaan_mediation_preBEP_meta_vamspn34e_height4.csv	preBEP	infant vams	vam_2008919	pn34e	height	4	279	-0.12754	-0.322215	-0.00631774	0.0917377	0.669781	0.0456007	1.31373	0.0372756	0.542241	-0.0505292	1.20652	0.0844078	0.999948	0.108136	0.106157
lavaan_mediation_preBEP_meta_vamspn34e_weight4.csv	preBEP	infant vams	vam_2009944	pn34e	weight	4	279	0.0317316	7.65213e-05	0.0705854	0.10363	0.291079	0.081531	0.500495	0.0037815	0.322811	0.124532	0.549447	0.00134212	0.999939	0.00455425	0.00354385
lavaan_mediation_preBEP_meta_vamspn34e_whz4.csv	preBEP	infant vams	vam_2009944	pn34e	whz	4	279	0.0409869	0.000268797	0.0988208	0.126324	0.247548	0.00711513	0.498518	0.056217	0.288535	0.0426563	0.545233	0.027167	0.909688	0.0731199	0.0488746
lavaan_mediation_preBEP_meta_vamspn12e_muac3.csv	preBEP	infant vams	vam_2010405	pn12e	muac	3	279	-0.363426	-0.817575	-0.00581898	0.100812	4.13787	1.97959	6.44303	0.000851236	3.77445	1.58065	6.13447	0.00192024	0.999246	0.00487738	0.00468087
lavaan_mediation_preBEP_meta_vamspn12e_muac4.csv	preBEP	infant vams	vam_2010405	pn12e	muac	4	277	-0.332331	-0.882947	-0.00368533	0.130431	4.12322	1.20324	6.55012	0.00200156	3.79089	0.844794	6.24023	0.00435427	0.999838	0.00940488	0.0087033
lavaan_mediation_preBEP_meta_vamspn12e_waz3.csv	preBEP	infant vams	vam_2010405	pn12e	waz	3	279	-0.0378311	-0.0900621	-0.00197691	0.0989198	0.406591	0.166906	0.647712	0.000579157	0.368759	0.129104	0.617999	0.00169835	0.999856	0.00389786	0.00353897
lavaan_mediation_preBEP_meta_vamspn12e_weight3.csv	preBEP	infant vams	vam_2010405	pn12e	weight	3	279	-0.0268578	-0.0632504	-0.00174495	0.107161	0.344657	0.130728	0.544958	0.000182631	0.317799	0.11871	0.512541	0.000501948	0.999747	0.000897473	0.000832245
lavaan_mediation_preBEP_meta_vamspn12e_whz2.csv	preBEP	infant vams	vam_2010737	pn12e	whz	2	280	-0.0484277	-0.11795	-0.000114772	0.100175	0.295307	0.0419581	0.565047	0.0312565	0.246879	-0.00290502	0.514324	0.0671916	0.999963	0.129337	0.121984
lavaan_mediation_preBEP_meta_vamspn12e_whz2.csv	preBEP	infant vams	vam_2011818	pn12e	whz	2	280	-0.0617769	-0.156321	-0.000507151	0.126043	0.308656	0.00468453	0.610372	0.0301005	0.246879	-0.0483098	0.522687	0.0731751	0.999963	0.129337	0.121984
lavaan_mediation_preBEP_meta_vamspn34e_weight4.csv	preBEP	infant vams	vam_2012513	pn34e	weight	4	279	0.0328395	0.00163526	0.0814008	0.108123	0.289971	0.131191	0.490051	0.00220045	0.322811	0.157327	0.534692	0.000841341	0.999939	0.00420937	0.00354385
lavaan_mediation_preBEP_meta_vamspn12e_muac2.csv	preBEP	infant vams	vam_2013194	pn12e	muac	2	280	-0.432584	-0.998243	-0.0750552	0.0645923	4.29887	2.21673	6.79311	3.68516e-05	3.86629	1.79999	6.18365	0.000195277	0.999992	0.000801587	0.000831502
lavaan_mediation_preBEP_meta_vamspn56e_waz7.csv	preBEP	infant vams	vam_2013375	pn56e	waz	7	210	-0.051911	-0.147327	-0.00190974	0.137888	0.479824	0.139116	0.849827	0.0036105	0.427913	0.0770924	0.748227	0.00783589	0.999825	0.0114182	0.0113218
lavaan_mediation_preBEP_meta_vamspn34e_whz4.csv	preBEP	infant vams	vam_2015571	pn34e	whz	4	279	0.0340997	0.00365065	0.0959105	0.144165	0.254435	0.000563274	0.506362	0.0500431	0.288535	0.0336759	0.557005	0.0248603	0.909688	0.0730124	0.0488746
lavaan_mediation_preBEP_meta_vamspn12e_hc2.csv	preBEP	infant vams	vam_2015937	pn12e	hc	2	280	-0.445197	-1.30837	-0.0589653	0.13665	4.44682	1.15858	7.19582	0.00327567	4.00162	0.663061	6.65921	0.00866278	0.999891	0.0201406	0.0187671
lavaan_mediation_preBEP_meta_vamspn12e_hc3.csv	preBEP	infant vams	vam_2015937	pn12e	hc	3	279	-0.519769	-1.19162	-0.0310912	0.102277	4.48392	1.35944	7.44162	0.00415955	3.96415	0.877826	6.94353	0.0111857	0.999812	0.024818	0.0243527
lavaan_mediation_preBEP_meta_vamspn56e_haz7.csv	preBEP	infant vams	vam_2016288	pn56e	haz	7	210	-0.0720065	-0.160348	-0.00751482	0.0623961	0.375326	0.0325056	0.702996	0.0266131	0.30332	-0.0363331	0.583292	0.066096	0.999766	0.103816	0.0996811
lavaan_mediation_preBEP_meta_vamspn56e_height7.csv	preBEP	infant vams	vam_2016288	pn56e	height	7	211	-0.132799	-0.32151	-0.0109714	0.132817	1.00928	0.23044	1.71747	0.00667973	0.876481	0.128057	1.50897	0.0120659	0.999993	0.0332223	0.0321695
lavaan_mediation_preBEP_meta_vamspn34e_whz4.csv	preBEP	infant vams	vam_2016752	pn34e	whz	4	279	0.0625396	0.00913128	0.131884	0.0557824	0.225995	0.0041527	0.52724	0.0977292	0.288535	0.0449484	0.582219	0.0286501	0.909688	0.0983381	0.0488746
lavaan_mediation_preBEP_meta_vamspn34e_weight5.csv	preBEP	infant vams	vam_2017110	pn34e	weight	5	271	0.0313082	0.000755179	0.080395	0.113126	0.2293	0.035183	0.436786	0.0319763	0.260608	0.0499481	0.47423	0.0142773	0.999777	0.0339438	0.025723
lavaan_mediation_preBEP_meta_vamspn34e_muac5.csv	preBEP	infant vams	vam_2017146	pn34e	muac	5	271	-0.290135	-0.798314	-0.0131235	0.196083	3.71471	0.798094	6.62771	0.00952388	3.42458	0.539957	6.47026	0.0162398	0.998723	0.0296555	0.0271299
lavaan_mediation_preBEP_meta_vamspn34e_hc4.csv	preBEP	infant vams	vam_2017578	pn34e	hc	4	279	-0.460114	-1.36107	-0.00906043	0.18711	4.41609	1.248	8.36968	0.00768225	3.95597	0.855403	7.31884	0.0158634	0.999838	0.0315799	0.0281731
lavaan_mediation_preBEP_meta_vamspn34e_whz4.csv	preBEP	infant vams	vam_2017578	pn34e	whz	4	279	-0.042737	-0.0998157	-0.000496817	0.101752	0.331272	0.0759101	0.609583	0.0145556	0.288535	0.0388071	0.565022	0.0321456	0.909688	0.0730124	0.0488746
lavaan_mediation_preBEP_meta_vamspn34e_whz4.csv	preBEP	infant vams	vam_2019477	pn34e	whz	4	279	0.0332798	0.00196098	0.0876915	0.120528	0.255255	0.00249035	0.528717	0.0617901	0.288535	0.0455972	0.552746	0.032476	0.909688	0.0739529	0.0488746
lavaan_mediation_preBEP_meta_vamspn34e_whz4.csv	preBEP	infant vams	vam_2020636	pn34e	whz	4	279	0.0323348	0.000550156	0.0923182	0.201589	0.2562	0.0231144	0.538235	0.0330595	0.288535	0.0462452	0.563848	0.0186081	0.909688	0.0730124	0.0488746
lavaan_mediation_preBEP_meta_vamspn34e_muac5.csv	preBEP	infant vams	vam_2021380	pn34e	muac	5	271	-0.367149	-0.963419	-0.0290334	0.101705	3.79172	1.16745	6.95155	0.00608949	3.42458	0.772784	6.54163	0.0131518	0.998723	0.0296555	0.0271299
lavaan_mediation_preBEP_meta_vamsbirth_muac2.csv	preBEP	infant vams	vam_2023111	birth	muac	2	191	-0.329744	-0.84393	-0.0255902	0.09028	3.37149	0.212504	6.21489	0.0227316	3.04175	0.137768	5.95889	0.0356463	0.903047	0.066138	0.0486436
lavaan_mediation_preBEP_meta_vamspn34e_muac5.csv	preBEP	infant vams	vam_2023301	pn34e	muac	5	271	-0.372897	-1.071	-0.0080752	0.212742	3.79747	1.3382	7.2301	0.0110644	3.42458	0.804884	6.65173	0.0242422	0.998723	0.0296555	0.0274744
lavaan_mediation_preBEP_meta_vamspn12e_hc2.csv	preBEP	infant vams	vam_2024038	pn12e	hc	2	280	0.042721	0.017839	0.86408	0.856358	3.9589	0.91942	7.35363	0.013733	4.00162	1.03676	7.50307	0.0113375	0.999891	0.0201406	0.0187671
lavaan_mediation_preBEP_meta_vamspn12e_hc4.csv	preBEP	infant vams	vam_2024055	pn12e	hc	4	277	-0.0411686	-0.413976	-0.0225362	0.687832	3.98468	0.985266	7.81738	0.0218788	3.94351	0.792717	7.67924	0.0228844	0.999539	0.0294039	0.028137
lavaan_mediation_preBEP_meta_vamspn12e_muac4.csv	preBEP	infant vams	vam_2024055	pn12e	muac	4	277	-0.0647599	-0.268608	-0.00208856	0.347994	3.85565	1.30452	6.92907	0.00313893	3.79089	1.22817	6.86397	0.00350953	0.999838	0.00940488	0.0087033
lavaan_mediation_preBEP_meta_vamspn12e_waz4.csv	preBEP	infant vams	vam_2024055	pn12e	waz	4	276	-0.00791752	-0.0322069	-0.00036189	0.363644	0.327842	0.128707	0.59303	0.00536418	0.319924	0.115061	0.585091	0.00623885	0.999876	0.0157355	0.014171
lavaan_mediation_preBEP_meta_vamspn12e_weight4.csv	preBEP	infant vams	vam_2024055	pn12e	weight	4	277	-0.00526267	-0.02735	-0.00193287	0.435685	0.322816	0.147942	0.512944	0.000572902	0.317553	0.143578	0.503251	0.000634643	0.999982	0.00285305	0.00261558
lavaan_mediation_preBEP_meta_vamspn34e_muac5.csv	preBEP	infant vams	vam_2024224	pn34e	muac	5	271	0.0411256	0.00936593	0.73148	0.81775	3.38345	0.468569	5.95416	0.0131785	3.42458	0.656417	6.16148	0.0109213	0.998723	0.0296555	0.0271299
lavaan_mediation_preBEP_meta_vamspn34e_whz4.csv	preBEP	infant vams	vam_2024224	pn34e	whz	4	279	0.0048444	0.00230032	0.101588	0.863664	0.28369	0.00158045	0.551373	0.0470194	0.288535	0.00915346	0.573531	0.0428215	0.999907	0.0730124	0.0488746
lavaan_mediation_preBEP_meta_vamspn12e_height3.csv	preBEP	infant vams	vam_2024513	pn12e	height	3	279	-0.163225	-0.360331	-0.0372938	0.0364708	0.845625	0.233982	1.475	0.00698837	0.6824	0.131454	1.27601	0.0188602	0.999887	0.0409806	0.0375986
lavaan_mediation_preBEP_meta_vamspn12e_height4.csv	preBEP	infant vams	vam_2024513	pn12e	height	4	277	-0.163658	-0.341412	-0.0147819	0.0488566	0.726187	0.0220793	1.27473	0.0265985	0.562529	-0.147345	1.12623	0.073519	0.999839	0.0956366	0.0885058
lavaan_mediation_preBEP_meta_vamspn12e_muac2.csv	preBEP	infant vams	vam_2024513	pn12e	muac	2	280	-0.495898	-1.17537	-0.0469452	0.0814623	4.36219	2.32702	6.41338	3.70224e-05	3.86629	1.82921	5.93183	0.000223801	0.999992	0.000801587	0.000831502
lavaan_mediation_preBEP_meta_vamspn12e_muac4.csv	preBEP	infant vams	vam_2024513	pn12e	muac	4	277	-0.621002	-1.48566	-0.0106939	0.100362	4.41189	1.2894	6.93703	0.00103389	3.79089	0.654846	6.60631	0.00445319	0.999838	0.00940488	0.0087033
lavaan_mediation_preBEP_meta_vamspn12e_waz4.csv	preBEP	infant vams	vam_2024513	pn12e	waz	4	276	-0.0570963	-0.111742	-0.00672828	0.0442831	0.37702	0.111391	0.598577	0.00285442	0.319924	0.063702	0.535981	0.0112386	0.999876	0.0157355	0.0141716
lavaan_mediation_preBEP_meta_vamspn12e_weight2.csv	preBEP	infant vams	vam_2024513	pn12e	weight	2	280	-0.0458925	-0.0933792	-0.00364724	0.0329618	0.31842	0.168062	0.470648	4.09161e-05	0.272528	0.111117	0.427789	0.000333409	0.999792	0.00131823	0.0012299
lavaan_mediation_preBEP_meta_vamspn12e_weight3.csv	preBEP	infant vams	vam_2024513	pn12e	weight	3	279	-0.0525922	-0.110899	-0.0124424	0.0415263	0.370391	0.186626	0.534038	3.09841e-05	0.317799	0.14091	0.462685	0.000218512	0.999747	0.000897473	0.00083058
lavaan_mediation_preBEP_meta_vamspn12e_weight4.csv	preBEP	infant vams	vam_2024513	pn12e	weight	4	277	-0.0549007	-0.113774	-0.00864566	0.0508951	0.372454	0.125371	0.598361	0.000899053	0.317553	0.1207	0.545976	0.00348569	0.999982	0.00285305	0.00360767
lavaan_mediation_preBEP_meta_vamspn34e_muac5.csv	preBEP	infant vams	vam_2025526	pn34e	muac	5	271	-0.344647	-0.914341	-0.00519806	0.126742	3.76922	1.26931	6.378	0.00345911	3.42458	0.774707	6.007	0.00907858	0.998723	0.0296555	0.0271299
lavaan_mediation_preBEP_meta_vamspn12e_muac2.csv	preBEP	infant vams	vam_2025775	pn12e	muac	2	280	-0.333965	-0.89503	-0.0214085	0.153059	4.20025	2.04266	6.50365	0.000248967	3.86629	1.54272	6.25752	0.000795209	0.999992	0.000801587	0.000935093
lavaan_mediation_preBEP_meta_vamspn12e_height2.csv	preBEP	infant vams	vam_2026897	pn12e	height	2	280	0.0713161	0.00181186	0.190345	0.137807	0.556885	0.012573	1.13007	0.0475474	0.628202	0.0356842	1.19848	0.0255669	0.99989	0.0599691	0.0536174
lavaan_mediation_preBEP_meta_vamspn12e_whz2.csv	preBEP	infant vams	vam_2027645	pn12e	whz	2	280	-0.052819	-0.110247	-0.00527345	0.0584723	0.299698	0.00864619	0.569089	0.0367198	0.246879	-0.0200404	0.529132	0.0904908	0.999963	0.129337	0.121984
lavaan_mediation_preBEP_meta_vamspn34e_waz4.csv	preBEP	infant vams	vam_2028407	pn34e	waz	4	278	0.0482534	0.00466484	0.109382	0.0731721	0.265411	0.0573065	0.490735	0.0188996	0.313665	0.0962313	0.558025	0.00545834	0.999988	0.021673	0.0178855
lavaan_mediation_preBEP_meta_vamspn34e_weight4.csv	preBEP	infant vams	vam_2028407	pn34e	weight	4	279	0.0444372	0.00811034	0.110717	0.0803791	0.278373	0.043485	0.489731	0.00846338	0.322811	0.107824	0.554243	0.00324247	0.999939	0.00849846	0.00374935
lavaan_mediation_preBEP_meta_vamspn34e_whz4.csv	preBEP	infant vams	vam_2028637	pn34e	whz	4	279	0.0471777	0.00381088	0.138409	0.132544	0.241357	0.00168643	0.500123	0.0759914	0.288535	0.0498145	0.550982	0.0312925	0.909688	0.0803883	0.0488746
lavaan_mediation_preBEP_meta_vamspn12e_hc2.csv	preBEP	infant vams	vam_2028656	pn12e	hc	2	280	0.390593	0.0166237	0.981975	0.125276	3.61103	0.185213	6.75752	0.0250454	4.00162	0.417573	6.92235	0.010527	0.999891	0.0258124	0.0187671
lavaan_mediation_preBEP_meta_vamspn12e_hc4.csv	preBEP	infant vams	vam_2028656	pn12e	hc	4	277	0.38453	0.0119473	0.946923	0.115932	3.55898	0.274198	7.12336	0.0419128	3.94351	0.608013	7.36451	0.0199098	0.999539	0.0422156	0.028137
lavaan_mediation_preBEP_meta_vamspn12e_muac2.csv	preBEP	infant vams	vam_2028656	pn12e	muac	2	280	0.294351	0.00289589	0.81892	0.146019	3.57194	1.69348	5.56472	0.000359975	3.86629	1.97994	5.79216	6.81704e-05	0.999992	0.000801587	0.000831502
lavaan_mediation_preBEP_meta_vamspn12e_weight2.csv	preBEP	infant vams	vam_2028656	pn12e	weight	2	280	0.0183554	8.20101e-05	0.0459681	0.145179	0.254172	0.0967088	0.405239	0.00133822	0.272528	0.114662	0.416519	0.00046708	0.999792	0.0015693	0.0012299
lavaan_mediation_preBEP_meta_vamspn12e_hc2.csv	preBEP	infant vams	vam_2030111	pn12e	hc	2	280	0.402889	0.0205634	1.11384	0.141281	3.59873	0.7179	6.60706	0.0123759	4.00162	1.20639	7.05725	0.00543215	0.999891	0.0201406	0.0187671
lavaan_mediation_preBEP_meta_vamspn12e_hc2.csv	preBEP	infant vams	vam_2030112	pn12e	hc	2	280	-0.363701	-0.886449	-0.00871494	0.133102	4.36532	1.52059	7.81046	0.00621311	4.00162	0.976777	7.62328	0.0114127	0.999891	0.0201406	0.0187671
lavaan_mediation_preBEP_meta_vamspn34e_whz4.csv	preBEP	infant vams	vam_2030437	pn34e	whz	4	279	0.035318	0.00116997	0.0984934	0.121117	0.253217	0.0104303	0.497149	0.0432287	0.288535	0.0465708	0.541795	0.0206182	0.909688	0.0730124	0.0488746
lavaan_mediation_preBEP_meta_vamspn12e_haz3.csv	preBEP	infant vams	vam_2030693	pn12e	haz	3	278	-0.0356265	-0.104936	-0.000133117	0.180469	0.228177	0.00453925	0.492405	0.0744171	0.19255	-0.0557459	0.467342	0.140763	0.999523	0.243229	0.218176
lavaan_mediation_preBEP_meta_vamspn12e_hc4.csv	preBEP	infant vams	vam_2030923	pn12e	hc	4	277	-0.05026	-0.819571	-0.0308932	0.863224	3.99377	1.19462	7.26878	0.0131105	3.94351	1.01566	7.10119	0.013199	0.999539	0.0294039	0.028137
lavaan_mediation_preBEP_meta_vamspn12e_muac3.csv	preBEP	infant vams	vam_2030923	pn12e	muac	3	279	-0.0200389	-0.617723	-0.00468846	0.916636	3.79449	1.51975	6.72992	0.00356631	3.77445	1.4854	6.45473	0.00256283	0.999246	0.0049434	0.00468087
lavaan_mediation_preBEP_meta_vamspn56e_height7.csv	preBEP	infant vams	vam_2031012	pn56e	height	7	211	0.127886	0.0108597	0.35559	0.11137	0.748595	0.0162973	1.46774	0.044303	0.876481	0.103329	1.53381	0.0153477	0.999993	0.045019	0.0321695
lavaan_mediation_preBEP_meta_vamspn34e_height4.csv	preBEP	infant vams	vam_2031268	pn34e	height	4	279	-0.167222	-0.364266	-0.0128637	0.0587675	0.709463	0.116259	1.34272	0.0246823	0.542241	-0.0438668	1.16192	0.0727414	0.999948	0.108136	0.106157
lavaan_mediation_preBEP_meta_vamspn34e_weight4.csv	preBEP	infant vams	vam_2032028	pn34e	weight	4	279	-0.026779	-0.0652956	-0.000712215	0.12455	0.34959	0.170501	0.564301	0.000600861	0.322811	0.124222	0.554127	0.00144498	0.999939	0.00420937	0.00354385
lavaan_mediation_preBEP_meta_vamspn34e_weight5.csv	preBEP	infant vams	vam_2032136	pn34e	weight	5	271	-0.0379783	-0.115713	-0.000259062	0.16148	0.298586	0.0236866	0.531839	0.0091672	0.260608	0.00401334	0.477217	0.0190852	0.999777	0.0302954	0.025723
lavaan_mediation_preBEP_meta_vamspn12e_hc4.csv	preBEP	infant vams	vam_2032139	pn12e	hc	4	277	-0.544782	-1.47426	-0.0347474	0.113884	4.48829	1.01228	8.39672	0.0124508	3.94351	0.631787	8.1655	0.0300541	0.999539	0.0294039	0.0311058
lavaan_mediation_preBEP_meta_vamspn34e_whz4.csv	preBEP	infant vams	vam_2032915	pn34e	whz	4	279	0.0369381	0.00303747	0.116945	0.217397	0.251596	0.0165576	0.53502	0.0617309	0.288535	0.0685238	0.575624	0.0307857	0.909688	0.0739529	0.0488746
lavaan_mediation_preBEP_meta_vamspn34e_hc4.csv	preBEP	infant vams	vam_2033339	pn34e	hc	4	279	-0.759598	-1.82556	-0.0792221	0.0799636	4.71557	1.2779	8.5428	0.00695097	3.95597	0.799262	7.49292	0.0200487	0.999838	0.0315799	0.0281731
lavaan_mediation_preBEP_meta_vamspn34e_hc5.csv	preBEP	infant vams	vam_2033339	pn34e	hc	5	271	-0.939303	-1.86999	-0.315654	0.0169715	5.05152	1.62099	8.48468	0.00335999	4.11222	0.341813	7.34145	0.0156167	0.999941	0.0320006	0.0279185
lavaan_mediation_preBEP_meta_vamspn34e_hc6.csv	preBEP	infant vams	vam_2033339	pn34e	hc	6	231	-0.899027	-1.95076	-0.122931	0.0508551	4.11437	0.184221	8.33377	0.0371701	3.21534	-0.93155	7.44896	0.101413	0.999872	0.144046	0.120742
lavaan_mediation_preBEP_meta_vamspn34e_height5.csv	preBEP	infant vams	vam_2033339	pn34e	height	5	271	-0.111986	-0.260142	-0.0231375	0.0766191	0.707321	0.0451964	1.32223	0.0160105	0.595335	-0.0103929	1.17701	0.044216	0.999367	0.0930636	0.0849576
lavaan_mediation_preBEP_meta_vamspn12e_hc4.csv	preBEP	infant vams	vam_2033516	pn12e	hc	4	277	-0.429178	-1.09135	-0.0226627	0.134527	4.37269	1.68201	8.47108	0.00687037	3.94351	1.25888	7.96386	0.0160724	0.999539	0.0294039	0.028137
lavaan_mediation_preBEP_meta_vamspn12e_waz3.csv	preBEP	infant vams	vam_2033516	pn12e	waz	3	279	-0.0407133	-0.101409	-0.00393587	0.1087	0.409473	0.184737	0.648649	0.000391098	0.368759	0.118985	0.612756	0.00184908	0.999856	0.00389786	0.00353897
lavaan_mediation_preBEP_meta_vamspn12e_whz3.csv	preBEP	infant vams	vam_2033516	pn12e	whz	3	279	-0.0578924	-0.151359	-0.00672522	0.105655	0.303933	0.069492	0.571181	0.0169428	0.246041	0.0123938	0.494497	0.0551949	0.999929	0.105938	0.0935276
lavaan_mediation_preBEP_meta_vamspn12e_whz4.csv	preBEP	infant vams	vam_2033516	pn12e	whz	4	277	-0.0519487	-0.134275	-0.0011928	0.120482	0.328545	0.0816481	0.582555	0.00930132	0.276597	0.0118747	0.53746	0.0382984	0.999669	0.0627933	0.0541655
lavaan_mediation_preBEP_meta_vamspn12e_hc2.csv	preBEP	infant vams	vam_2033633	pn12e	hc	2	280	-0.655503	-1.3596	-0.0605444	0.052809	4.65712	1.799	7.57289	0.00217328	4.00162	1.30343	7.04223	0.00616209	0.999891	0.0201406	0.0187671
lavaan_mediation_preBEP_meta_vamspn12e_hc3.csv	preBEP	infant vams	vam_2033633	pn12e	hc	3	279	-0.596125	-1.26469	-0.0810731	0.0406108	4.56028	1.06358	7.11227	0.00460482	3.96415	0.524657	6.66698	0.0117876	0.999812	0.024818	0.0243527
lavaan_mediation_preBEP_meta_vamspn12e_hc4.csv	preBEP	infant vams	vam_2033633	pn12e	hc	4	277	-0.612946	-1.33451	-0.130602	0.0329295	4.55646	1.01308	7.91855	0.00495321	3.94351	0.565118	7.07146	0.0145395	0.999539	0.0294039	0.028137
lavaan_mediation_preBEP_meta_vamspn12e_muac2.csv	preBEP	infant vams	vam_2033633	pn12e	muac	2	280	-0.59412	-1.37847	-0.113503	0.0562428	4.46041	2.35783	7.07627	8.06654e-05	3.86629	1.85363	6.44379	0.000440414	0.999992	0.000801587	0.000831502
lavaan_mediation_preBEP_meta_vamspn12e_muac3.csv	preBEP	infant vams	vam_2033633	pn12e	muac	3	279	-0.52296	-1.07276	-0.0872455	0.0443138	4.29741	1.68286	6.76698	0.000653818	3.77445	1.3025	6.28375	0.0026985	0.999246	0.00487738	0.00468087
lavaan_mediation_preBEP_meta_vamspn12e_muac4.csv	preBEP	infant vams	vam_2033633	pn12e	muac	4	277	-0.612651	-1.28476	-0.164405	0.0345229	4.40354	1.07305	7.59707	0.00392926	3.79089	0.732848	6.94315	0.00931644	0.999838	0.00940488	0.00990506
lavaan_mediation_preBEP_meta_vamspn34e_whz4.csv	preBEP	infant vams	vam_2033729	pn34e	whz	4	279	0.0494093	0.00503041	0.130871	0.109805	0.239125	0.00447196	0.545042	0.0954499	0.288535	0.0577121	0.590637	0.0429627	0.909688	0.0966468	0.0488746
lavaan_mediation_preBEP_meta_vamspn34e_muac4.csv	preBEP	infant vams	vam_2035204	pn34e	muac	4	279	-0.392415	-1.08134	-0.0260474	0.151655	4.17378	0.775023	7.58807	0.00911843	3.78137	0.551156	7.06969	0.0146081	0.999931	0.0116875	0.0147144
lavaan_mediation_preBEP_meta_vamspn12e_muac2.csv	preBEP	infant vams	vam_2035876	pn12e	muac	2	280	0.209948	0.0250992	0.419009	0.0684518	3.65634	1.54622	5.76867	0.000338197	3.86629	1.76787	5.91565	0.000169178	0.999992	0.000801587	0.000831502
lavaan_mediation_preBEP_meta_vamspn12e_muac4.csv	preBEP	infant vams	vam_2037589	pn12e	muac	4	277	-0.432754	-1.00803	-0.0460991	0.0829416	4.22365	1.96758	7.09773	0.00104027	3.79089	1.32882	6.66319	0.00336346	0.999838	0.00940488	0.0087033
lavaan_mediation_preBEP_meta_vamspn34e_whz4.csv	preBEP	infant vams	vam_2038292	pn34e	whz	4	279	0.0486915	0.0084052	0.108591	0.0520988	0.239843	0.00673665	0.489002	0.0565317	0.288535	0.0823837	0.514905	0.0144686	0.909688	0.0731365	0.0488746
lavaan_mediation_preBEP_meta_vamspn12e_hc3.csv	preBEP	infant vams	vam_2038486	pn12e	hc	3	279	-0.355094	-1.06731	-0.00585656	0.181072	4.31925	1.0216	8.09036	0.0135492	3.96415	0.865953	7.72158	0.0240074	0.999812	0.024818	0.0260058
lavaan_mediation_preBEP_meta_vamspn12e_hc2.csv	preBEP	infant vams	vam_2039534	pn12e	hc	2	280	-0.251139	-0.819319	-0.0477839	0.164793	4.25276	1.23748	7.32953	0.00737827	4.00162	0.826917	7.07806	0.0115678	0.999891	0.0201406	0.0187671
lavaan_mediation_preBEP_meta_vamspn12e_hc3.csv	preBEP	infant vams	vam_2039534	pn12e	hc	3	279	-0.272233	-0.872844	-0.0293548	0.208922	4.23639	1.19555	7.50967	0.0152562	3.96415	0.498922	7.2905	0.0245425	0.999812	0.024818	0.026298
lavaan_mediation_preBEP_meta_vamspn12e_hc4.csv	preBEP	infant vams	vam_2039534	pn12e	hc	4	277	-0.316511	-0.884751	-0.0292385	0.134056	4.26002	0.597675	8.49869	0.0145255	3.94351	0.132911	8.23612	0.022569	0.999539	0.0294039	0.028137
lavaan_mediation_preBEP_meta_vamspn12e_hc2.csv	preBEP	infant vams	vam_2039878	pn12e	hc	2	280	0.68986	0.0895379	1.71356	0.0935141	3.31176	0.397374	6.49828	0.0328671	4.00162	1.0982	7.32351	0.00907003	0.999891	0.0330023	0.0187671
lavaan_mediation_preBEP_meta_vamspn12e_hc3.csv	preBEP	infant vams	vam_2039878	pn12e	hc	3	279	0.598666	0.0206504	1.27628	0.0613957	3.36549	0.4165	6.37771	0.0296231	3.96415	0.942809	6.57259	0.00968063	0.999812	0.0306372	0.0243527
lavaan_mediation_preBEP_meta_vamspn12e_hc3.csv	preBEP	infant vams	vam_2039960	pn12e	hc	3	279	-0.398899	-1.40673	-0.00927926	0.233735	4.36305	1.23535	7.75834	0.00569647	3.96415	0.86643	7.12217	0.0115577	0.999812	0.024818	0.0243527
lavaan_mediation_preBEP_meta_vamspn12e_hc3.csv	preBEP	infant vams	vam_2040057	pn12e	hc	3	279	-0.381846	-0.919083	-0.0601077	0.0818076	4.346	1.25719	7.65695	0.00690563	3.96415	1.04082	7.58572	0.0147084	0.999812	0.024818	0.0243527
lavaan_mediation_preBEP_meta_vamspn12e_weight3.csv	preBEP	infant vams	vam_2040409	pn12e	weight	3	279	-0.0201231	-0.0497445	-0.000757343	0.11684	0.337922	0.109076	0.489648	0.000514871	0.317799	0.0963883	0.480018	0.00107783	0.999747	0.000897473	0.00113275
lavaan_mediation_preBEP_meta_vamspn12e_hc2.csv	preBEP	infant vams	vam_2041308	pn12e	hc	2	280	-0.728695	-1.47953	-0.10649	0.0227103	4.73032	1.82276	7.94524	0.00243731	4.00162	1.48767	7.67899	0.00988394	0.999891	0.0201406	0.0187671
lavaan_mediation_preBEP_meta_vamspn12e_hc3.csv	preBEP	infant vams	vam_2041308	pn12e	hc	3	279	-0.690742	-1.57362	-0.0915483	0.0468084	4.6549	1.38362	7.3763	0.00344386	3.96415	0.720794	6.771	0.0114372	0.999812	0.024818	0.0243527
lavaan_mediation_preBEP_meta_vamspn12e_hc4.csv	preBEP	infant vams	vam_2041308	pn12e	hc	4	277	-0.733753	-1.50927	-0.0877246	0.0364823	4.67726	1.15918	8.2235	0.003533	3.94351	0.543463	7.54366	0.016162	0.999539	0.0294039	0.028137
lavaan_mediation_preBEP_meta_vamspn12e_muac2.csv	preBEP	infant vams	vam_2041308	pn12e	muac	2	280	-0.547048	-1.16346	-0.0639463	0.0405886	4.41334	1.77895	6.87373	0.000213665	3.86629	1.323	6.21997	0.000855783	0.999992	0.000801587	0.000973478
lavaan_mediation_preBEP_meta_vamspn12e_whz2.csv	preBEP	infant vams	vam_2041308	pn12e	whz	2	280	-0.0557893	-0.11621	-0.00976522	0.0400443	0.302668	0.0350024	0.60853	0.0370441	0.246879	-0.00550516	0.561737	0.0811221	0.999963	0.129337	0.121984
lavaan_mediation_preBEP_meta_vamspn56e_hc7.csv	preBEP	infant vams	vam_2041654	pn56e	hc	7	211	-0.076508	-0.175755	-0.0019787	0.0859521	0.599581	0.166015	1.00124	0.00406921	0.523073	0.125989	0.930362	0.012201	0.999974	0.0149132	0.0145151
lavaan_mediation_preBEP_meta2_milkpn12_muac4.csv	preBEP	milk	rLC_neg_mtb_1205121	pn12	muac	4	279	0.29004	0.0119986	0.668014	0.0657168	3.31106	0.977292	6.46179	0.0128573	3.6011	1.24135	6.71155	0.00665431	0.999954	0.0146539	0.0140702
lavaan_mediation_preBEP_meta2_milk1421_waz1.csv	preBEP	milk	rLC_neg_mtb_1210307	1421	waz	1	273	0.0239001	0.000777875	0.0492783	0.042523	0.278861	0.00432852	0.50977	0.029626	0.302761	0.0223164	0.536788	0.0181564	0.999996	0.0316418	0.0181564
lavaan_mediation_preBEP_meta2_milk1421_waz2.csv	preBEP	milk	rLC_neg_mtb_1210307	1421	waz	2	269	0.0276546	0.0025587	0.0573089	0.0335481	0.313445	0.105285	0.500926	0.00323159	0.341099	0.141574	0.526341	0.00144112	0.999901	0.0090793	0.00840457
lavaan_mediation_preBEP_meta2_milkpn34_weight4.csv	preBEP	milk	rLC_neg_mtb_1215342	pn34	weight	4	274	0.0584976	0.0112218	0.126026	0.030691	0.256304	0.0530054	0.441822	0.0155571	0.314801	0.124399	0.51413	0.00281289	0.99989	0.0155691	0.00509685
lavaan_mediation_preBEP_meta2_milkpn34_muac4.csv	preBEP	milk	rLC_neg_mtb_1234544	pn34	muac	4	274	-0.566221	-1.29981	-0.0548886	0.0643352	4.39003	1.2843	7.30385	0.00364511	3.82381	0.850751	7.0379	0.0120629	0.999985	0.0116854	0.0124363
lavaan_mediation_preBEP_meta2_milkpn34_waz4.csv	preBEP	milk	rLC_neg_mtb_1282849	pn34	waz	4	273	0.0421287	0.000821417	0.104057	0.102445	0.260219	0.0503971	0.520658	0.0223942	0.302348	0.0509779	0.546915	0.00918953	0.999874	0.0288217	0.0259936
lavaan_mediation_preBEP_meta2_milkpn34_weight4.csv	preBEP	milk	rLC_neg_mtb_1282849	pn34	weight	4	274	0.0344628	0.00308195	0.0865693	0.0931211	0.280338	0.100236	0.463369	0.00341318	0.314801	0.125228	0.517004	0.00138086	0.99989	0.00558691	0.00509685
lavaan_mediation_preBEP_meta2_milkpn12_waz2.csv	preBEP	milk	rLC_neg_mtb_1284156	pn12	waz	2	281	-0.0156206	-0.0409545	-0.00197378	0.102878	0.370231	0.153344	0.659956	0.00290835	0.354611	0.137089	0.646537	0.00427038	0.999999	0.00621898	0.00564301
lavaan_mediation_preBEP_meta2_milkpn34_hc4.csv	preBEP	milk	rLC_neg_mtb_128448	pn34	hc	4	274	-0.807903	-1.76693	-0.0431298	0.0604224	4.64118	1.13755	8.42158	0.00658687	3.83328	0.10782	7.5594	0.026017	0.999737	0.0416479	0.0361816
lavaan_mediation_preBEP_meta_milkpn34_stunting6.csv	preBEP	milk	rLC_neg_mtb_1286495	pn34	stunting	6	227	-0.000140751	-0.000140751	-0.000140751	NA	-0.305502	-0.305502	-0.305502	NA	-0.305642	-0.305642	-0.305642	NA	NA	NA	NA
lavaan_mediation_preBEP_meta2_milk1421_muac1.csv	preBEP	milk	rLC_neg_mtb_1337137	1421	muac	1	273	0.323944	0.0180895	0.783576	0.0847578	2.42262	0.132927	4.68093	0.026786	2.74657	0.532279	4.96752	0.0119764	0.999938	0.0273593	0.0119764
lavaan_mediation_preBEP_meta2_milk1421_weight1.csv	preBEP	milk	rLC_neg_mtb_1337137	1421	weight	1	273	0.0182157	0.000231656	0.0443085	0.0931119	0.173799	0.0236893	0.341299	0.0257529	0.192015	0.0383118	0.355641	0.0137955	0.999942	0.0264172	0.0137955
lavaan_mediation_preBEP_meta2_milkpn12_hc2.csv	preBEP	milk	rLC_neg_mtb_1340852	pn12	hc	2	281	-0.499241	-1.29694	-0.0422948	0.0787258	3.96816	0.743182	6.78014	0.0112624	3.46892	0.343864	6.48485	0.0268217	1	0.0484715	0.0449541
lavaan_mediation_preBEP_meta2_milkpn34_hc4.csv	preBEP	milk	rLC_neg_mtb_1348891	pn34	hc	4	274	-0.693518	-1.50658	-0.0115421	0.0875253	4.5268	1.38235	8.75588	0.0147103	3.83328	0.660631	8.04626	0.0350746	0.999737	0.0416479	0.037415
lavaan_mediation_preBEP_meta2_milkpn34_muac4.csv	preBEP	milk	rLC_neg_mtb_1348891	pn34	muac	4	274	-0.704507	-1.5847	-0.148166	0.0615626	4.52832	1.33308	7.39269	0.00186644	3.82381	0.987165	6.9059	0.00678519	0.999985	0.0116854	0.0101753
lavaan_mediation_preBEP_meta2_milkpn34_weight4.csv	preBEP	milk	rLC_neg_mtb_1352580	pn34	weight	4	274	0.030812	0.000617884	0.0718517	0.103386	0.283989	0.0830826	0.475055	0.00446908	0.314801	0.114079	0.4944	0.00177448	0.99989	0.00569768	0.00509685
lavaan_mediation_preBEP_meta2_milk1421_muac1.csv	preBEP	milk	rLC_neg_mtb_1353273	1421	muac	1	273	0.399789	0.0305718	1.01635	0.108744	2.34678	0.0811067	4.67847	0.0301502	2.74657	0.532279	4.96752	0.0119764	0.999938	0.0305342	0.0119764
lavaan_mediation_preBEP_meta2_milkpn34_muac4.csv	preBEP	milk	rLC_neg_mtb_1353454	pn34	muac	4	274	-0.755118	-1.60308	-0.109741	0.0676987	4.57893	1.78211	7.3687	0.000789904	3.82381	0.932806	6.61746	0.00654722	0.999985	0.0116854	0.0101753
lavaan_mediation_preBEP_meta2_milkpn34_muac4.csv	preBEP	milk	rLC_neg_mtb_1386888	pn34	muac	4	274	0.622011	0.077773	1.34949	0.0427896	3.2018	0.695517	5.84378	0.0157821	3.82381	1.24411	6.40245	0.00396433	0.999985	0.0162816	0.0101753
lavaan_mediation_preBEP_meta2_milk1421_muac2.csv	preBEP	milk	rLC_neg_mtb_1411143	1421	muac	2	269	0.557481	0.201899	1.30027	0.0513232	3.06479	0.510832	5.07981	0.00388465	3.62227	1.09992	5.69773	0.00110418	0.999918	0.00413047	0.00282707
lavaan_mediation_preBEP_meta2_milk1421_waz2.csv	preBEP	milk	rLC_neg_mtb_1411143	1421	waz	2	269	0.0766339	0.0272181	0.155527	0.0214393	0.264465	0.0657869	0.46768	0.0169434	0.341099	0.129812	0.554435	0.00352867	0.999901	0.0170004	0.00840457
lavaan_mediation_preBEP_meta2_milk1421_weight1.csv	preBEP	milk	rLC_neg_mtb_1411143	1421	weight	1	273	0.0427909	0.0134489	0.0865976	0.0236325	0.149224	0.00933257	0.29481	0.0448876	0.192015	0.0383118	0.355641	0.0137955	0.999942	0.0449253	0.0137955
lavaan_mediation_preBEP_meta2_milk1421_weight2.csv	preBEP	milk	rLC_neg_mtb_1411143	1421	weight	2	269	0.0471527	0.0168623	0.104698	0.0299645	0.212547	0.0445559	0.360963	0.00789736	0.259699	0.0982366	0.39755	0.00189392	0.99957	0.00795068	0.00443179
lavaan_mediation_preBEP_meta2_milk1421_whz1.csv	preBEP	milk	rLC_neg_mtb_1411143	1421	whz	1	273	0.0723472	0.0147525	0.153062	0.0463037	0.307728	0.0685582	0.552723	0.0194076	0.380075	0.111042	0.664032	0.00434595	0.999975	0.0194729	0.00434596
lavaan_mediation_preBEP_meta2_milkpn34_muac4.csv	preBEP	milk	rLC_neg_mtb_1463774	pn34	muac	4	274	-0.46054	-0.954528	-0.0171421	0.0751712	4.28435	1.40274	7.06847	0.00361559	3.82381	1.19522	6.60068	0.00866263	0.999985	0.0116854	0.010407
lavaan_mediation_preBEP_meta2_milk1421_hc2.csv	preBEP	milk	rLC_neg_mtb_152071	1421	hc	2	269	0.712316	0.105567	1.3758	0.033739	2.67151	0.0195615	6.19624	0.0863456	3.38383	0.651504	6.65	0.03079	0.99976	0.0870755	0.0567548
lavaan_mediation_preBEP_meta2_milkpn12_muac2.csv	preBEP	milk	rLC_neg_mtb_155267	pn12	muac	2	281	0.299225	0.0145439	0.665755	0.0719093	3.39449	1.34563	5.55572	0.00123261	3.69371	1.70781	5.70462	0.000486052	1	0.00185006	0.00173548
lavaan_mediation_preBEP_meta2_milkpn12_waz2.csv	preBEP	milk	rLC_neg_mtb_155267	pn12	waz	2	281	0.0428652	0.00911129	0.0935313	0.055429	0.311746	0.0787267	0.526	0.0102985	0.354611	0.133418	0.569405	0.00394187	0.999999	0.0104563	0.00563285
lavaan_mediation_preBEP_meta2_milkpn12_weight2.csv	preBEP	milk	rLC_neg_mtb_155267	pn12	weight	2	281	0.0233477	0.00109818	0.0644649	0.146312	0.231247	0.0790923	0.376681	0.00387771	0.254594	0.0975028	0.392059	0.00155099	1	0.004174	0.0029603
lavaan_mediation_preBEP_meta2_milkpn12_muac2.csv	preBEP	milk	rLC_neg_mtb_1596675	pn12	muac	2	281	-0.365406	-0.946395	-0.010092	0.123947	4.05912	1.70844	6.4212	0.000445533	3.69371	1.37939	6.11882	0.00167198	1	0.00183292	0.00190832
lavaan_mediation_preBEP_meta2_milkpn34_hc5.csv	preBEP	milk	rLC_neg_mtb_1620620	pn34	hc	5	266	-0.597872	-1.44971	-0.00807231	0.0966873	4.60375	1.23349	7.86063	0.0107388	4.00588	0.721732	7.25539	0.028497	0.999966	0.0389309	0.0356899
lavaan_mediation_preBEP_meta2_milkpn34_hc6.csv	preBEP	milk	rLC_neg_mtb_1620620	pn34	hc	6	227	-0.729426	-1.57697	-0.0277554	0.0784318	3.8108	0.0575093	8.42521	0.0594519	3.08137	-1.19307	7.33644	0.123692	0.999967	0.156121	0.144558
lavaan_mediation_preBEP_meta2_milkpn34_height5.csv	preBEP	milk	rLC_neg_mtb_1620620	pn34	height	5	266	-0.117899	-0.251615	-0.0085492	0.0969393	0.63084	0.0263313	1.21649	0.0442817	0.512941	-0.126193	1.10586	0.106121	0.999747	0.156313	0.146696
lavaan_mediation_preBEP_meta2_milkpn34_height6.csv	preBEP	milk	rLC_neg_mtb_1620620	pn34	height	6	227	-0.138255	-0.318393	-0.00616938	0.0923147	0.58496	0.0274437	1.22486	0.0554079	0.446706	-0.17806	1.13801	0.15057	0.999999	0.247429	0.228109
lavaan_mediation_preBEP_meta2_milkpn34_muac4.csv	preBEP	milk	rLC_neg_mtb_1620620	pn34	muac	4	274	-0.505818	-1.19096	-0.00960024	0.108746	4.32963	1.50261	7.00458	0.00136513	3.82381	1.06579	6.71426	0.00505656	0.999985	0.0116854	0.0101753
lavaan_mediation_preBEP_meta2_milkpn34_muac5.csv	preBEP	milk	rLC_neg_mtb_1620620	pn34	muac	5	266	-0.504247	-1.23667	-0.0259314	0.0923032	4.09107	1.4766	7.66467	0.00610608	3.58682	1.18699	7.10807	0.0167253	0.999983	0.0218328	0.0209441
lavaan_mediation_preBEP_meta2_milkpn34_muac6.csv	preBEP	milk	rLC_neg_mtb_1620620	pn34	muac	6	227	-0.719824	-1.67628	-0.0861751	0.0645273	3.26237	0.327442	6.24385	0.0273945	2.54255	-0.586592	5.52306	0.0859435	0.99998	0.133628	0.123671
lavaan_mediation_preBEP_meta2_milkpn34_weight4.csv	preBEP	milk	rLC_neg_mtb_1620620	pn34	weight	4	274	-0.0378349	-0.0871358	-0.000499984	0.104288	0.352636	0.15559	0.551318	0.000657461	0.314801	0.122462	0.521653	0.00272217	0.99989	0.00558691	0.00509685
lavaan_mediation_preBEP_meta2_milkpn34_weight5.csv	preBEP	milk	rLC_neg_mtb_1620620	pn34	weight	5	266	-0.0389204	-0.0951628	-0.0025526	0.102631	0.295272	0.0872349	0.520492	0.00756564	0.256352	0.0489111	0.488449	0.0225676	0.999598	0.0324619	0.0309724
lavaan_mediation_preBEP_meta2_milkpn34_weight6.csv	preBEP	milk	rLC_neg_mtb_1620620	pn34	weight	6	227	-0.0505417	-0.127559	-0.00386239	0.0868587	0.2708	0.0284379	0.548376	0.0314326	0.220258	-0.00219042	0.490751	0.0790525	0.999991	0.108824	0.101754
lavaan_mediation_preBEP_meta2_milkpn12_whz3.csv	preBEP	milk	rLC_neg_mtb_1647826	pn12	whz	3	281	-0.0466687	-0.122253	-0.00355676	0.0900903	0.317792	0.064349	0.625307	0.0236204	0.271123	0.00573994	0.572357	0.0542028	0.999992	0.069455	0.0658317
lavaan_mediation_preBEP_meta2_milk1421_waz1.csv	preBEP	milk	rLC_neg_mtb_1670250	1421	waz	1	273	-0.0379077	-0.0983052	-0.0016678	0.108184	0.340669	0.0624042	0.60769	0.00996003	0.302761	0.0223164	0.536788	0.0181564	0.999996	0.0279878	0.0181564
lavaan_mediation_preBEP_meta2_milk1421_hc2.csv	preBEP	milk	rLC_neg_mtb_1685649	1421	hc	2	269	-0.618445	-1.38555	-0.0021402	0.0708459	4.00227	0.867342	6.85216	0.00787012	3.38383	0.176764	6.14173	0.0260905	0.99976	0.0632079	0.0567548
lavaan_mediation_preBEP_meta2_milk1421_height2.csv	preBEP	milk	rLC_neg_mtb_1685649	1421	height	2	269	-0.109029	-0.233332	-0.00386342	0.0619283	0.610719	0.0191862	1.16593	0.0396151	0.50169	-0.11879	1.15603	0.101932	0.999622	0.153265	0.1391
lavaan_mediation_preBEP_meta2_milkpn12_waz4.csv	preBEP	milk	rLC_neg_mtb_1695329	pn12	waz	4	278	0.0368212	0.00415118	0.089655	0.101253	0.2533	0.00178054	0.467135	0.0303574	0.290121	0.0312633	0.496967	0.0128831	0.999885	0.0326461	0.0295301
lavaan_mediation_preBEP_meta2_milkpn12_weight4.csv	preBEP	milk	rLC_neg_mtb_1695329	pn12	weight	4	279	0.0346337	0.00147682	0.0793604	0.0931967	0.258413	0.0625197	0.448346	0.00971855	0.293047	0.0780137	0.493238	0.00486488	0.999763	0.0099155	0.00648853
lavaan_mediation_preBEP_meta2_milkpn12_muac2.csv	preBEP	milk	rLC_neg_mtb_1750682	pn12	muac	2	281	-0.418157	-0.908288	-0.0626754	0.0538381	4.11187	1.5861	6.93598	0.0010422	3.69371	1.27613	6.17376	0.00342451	1	0.00183292	0.0034367
lavaan_mediation_preBEP_meta2_milkpn34_hc5.csv	preBEP	milk	rLC_neg_mtb_1758683	pn34	hc	5	266	0.0506245	0.00139844	0.742263	0.79575	3.95526	0.161311	7.41007	0.0313043	4.00588	0.296751	7.57009	0.0286319	0.999966	0.0389309	0.0356899
lavaan_mediation_preBEP_meta2_milkpn34_hc4.csv	preBEP	milk	rLC_neg_mtb_1787234	pn34	hc	4	274	-0.626444	-1.64236	-0.0420329	0.106847	4.45972	1.27057	7.81538	0.00698213	3.83328	0.469803	7.52637	0.023456	0.999737	0.0416479	0.0361816
lavaan_mediation_preBEP_meta2_milkpn34_weight4.csv	preBEP	milk	rLC_neg_mtb_1787234	pn34	weight	4	274	-0.0350715	-0.08966	-0.00132938	0.103212	0.349873	0.127841	0.620455	0.00200769	0.314801	0.10196	0.584314	0.00605654	0.99989	0.00558691	0.00634356
lavaan_mediation_preBEP_meta2_milk1421_muac2.csv	preBEP	milk	rLC_neg_mtb_1805195	1421	muac	2	269	-0.436032	-1.09133	-0.0586686	0.0899768	4.0583	1.83541	6.30407	0.000362779	3.62227	1.37551	6.06519	0.00123383	0.999918	0.00303979	0.00282707
lavaan_mediation_preBEP_meta2_milk1421_hc1.csv	preBEP	milk	rLC_neg_mtb_1846872	1421	hc	1	273	-0.607817	-1.40897	-0.000251551	0.0773773	4.0976	0.696877	7.11445	0.0142474	3.48979	0.251832	6.39392	0.0387205	0.999956	0.0559935	0.0387206
lavaan_mediation_preBEP_meta2_milk1421_height2.csv	preBEP	milk	rLC_neg_mtb_1846872	1421	height	2	269	-0.159842	-0.365294	-0.0267099	0.0356547	0.661532	0.0195329	1.30696	0.0402948	0.50169	-0.174961	1.13903	0.118494	0.999622	0.153265	0.1391
lavaan_mediation_preBEP_meta2_milk1421_muac2.csv	preBEP	milk	rLC_neg_mtb_1846872	1421	muac	2	269	-0.459124	-1.07193	-0.0584064	0.0413248	4.0814	1.95643	5.86036	0.000222115	3.62227	1.57237	5.25257	0.000854147	0.999918	0.00303979	0.00282707
lavaan_mediation_preBEP_meta2_milk1421_waz2.csv	preBEP	milk	rLC_neg_mtb_1846872	1421	waz	2	269	-0.0574272	-0.119775	-0.0087444	0.0351907	0.398526	0.200113	0.603495	0.00016769	0.341099	0.148206	0.535307	0.0011985	0.999901	0.0090793	0.00840457
lavaan_mediation_preBEP_meta2_milk1421_weight2.csv	preBEP	milk	rLC_neg_mtb_1846872	1421	weight	2	269	-0.0464183	-0.0937015	-0.00766181	0.0275767	0.306118	0.170692	0.454345	7.45969e-05	0.259699	0.116538	0.42702	0.000829423	0.99957	0.00480993	0.00443179
lavaan_mediation_preBEP_meta2_milk1421_hc2.csv	preBEP	milk	rLC_neg_mtb_1846883	1421	hc	2	269	-0.698015	-1.72039	-0.0573013	0.0853544	4.08184	0.606001	7.42782	0.0168761	3.38383	0.400728	6.79018	0.048779	0.99976	0.0632079	0.0567548
lavaan_mediation_preBEP_meta2_milk1421_muac2.csv	preBEP	milk	rLC_neg_mtb_1846883	1421	muac	2	269	-0.426222	-1.02376	-0.047598	0.0570806	4.04849	1.59646	6.56606	0.00115375	3.62227	1.24229	5.95401	0.00301383	0.999918	0.00303979	0.00329706
lavaan_mediation_preBEP_meta2_milk1421_waz2.csv	preBEP	milk	rLC_neg_mtb_1846883	1421	waz	2	269	-0.0454606	-0.105996	-0.00459893	0.0677177	0.38656	0.114785	0.638677	0.00462515	0.341099	0.0745896	0.590491	0.00999416	0.999901	0.0090793	0.010323
lavaan_mediation_preBEP_meta2_milk1421_weight2.csv	preBEP	milk	rLC_neg_mtb_1846883	1421	weight	2	269	-0.0397512	-0.084668	-0.00509284	0.0518109	0.299451	0.0963572	0.471549	0.00149956	0.259699	0.0528265	0.445689	0.00579554	0.99957	0.00480993	0.00590443
lavaan_mediation_preBEP_meta2_milk1421_muac2.csv	preBEP	milk	rLC_neg_mtb_1851694	1421	muac	2	269	0.39808	0.0015927	0.8554	0.0554279	3.22419	0.715094	5.48331	0.00872014	3.62227	1.06553	5.90737	0.00334058	0.999918	0.00872014	0.00354881
lavaan_mediation_preBEP_meta2_milk1421_muac2.csv	preBEP	milk	rLC_neg_mtb_1851918	1421	muac	2	269	0.478752	0.0108217	1.07896	0.0838413	3.14352	1.24114	5.51538	0.00333823	3.62227	1.64579	5.84701	0.000632283	0.999918	0.00372895	0.00282707
lavaan_mediation_preBEP_meta2_milkpn12_weight2.csv	preBEP	milk	rLC_neg_mtb_1868950	pn12	weight	2	281	-0.023051	-0.05972	-0.000852911	0.137013	0.277645	0.108458	0.455729	0.00159554	0.254594	0.0853976	0.435908	0.0033629	1	0.00314094	0.00361986
lavaan_mediation_preBEP_meta2_milkpn34_muac4.csv	preBEP	milk	rLC_neg_mtb_1878633	pn34	muac	4	274	0.319702	0.0109612	0.925634	0.146466	3.50411	0.455656	6.07801	0.00701501	3.82381	0.776836	6.37621	0.00398431	0.999985	0.0116854	0.0101753
lavaan_mediation_preBEP_meta2_milkpn34_height5.csv	preBEP	milk	rLC_neg_mtb_1927807	pn34	height	5	266	-0.0805714	-0.190861	-4.1942e-05	0.0942961	0.593512	0.0224829	1.28358	0.0716495	0.512941	-0.0784591	1.26786	0.112904	0.999747	0.156313	0.146696
lavaan_mediation_preBEP_meta2_milkpn34_muac4.csv	preBEP	milk	rLC_neg_mtb_1975961	pn34	muac	4	274	0.681457	0.105941	1.45973	0.0448537	3.14235	0.459824	5.76436	0.0172192	3.82381	1.04134	6.64223	0.00455388	0.999985	0.0175284	0.0101753
lavaan_mediation_preBEP_meta2_milkpn34_weight4.csv	preBEP	milk	rLC_neg_mtb_1975961	pn34	weight	4	274	0.0428132	0.00677295	0.0941416	0.0483701	0.271988	0.0853883	0.450317	0.00640242	0.314801	0.121617	0.494147	0.00197916	0.99989	0.0068998	0.00509685
lavaan_mediation_preBEP_meta2_milkpn34_whz4.csv	preBEP	milk	rLC_neg_mtb_1975961	pn34	whz	4	274	0.0446633	0.00264075	0.0979294	0.0739314	0.259118	0.00552587	0.500602	0.044925	0.303781	0.0573417	0.551813	0.0201562	0.999236	0.0482158	0.0399654
lavaan_mediation_preBEP_meta2_milk1421_waz1.csv	preBEP	milk	rLC_neg_mtb_2036504	1421	waz	1	273	-0.044122	-0.104448	-0.00280422	0.0781395	0.346883	0.0933134	0.590334	0.00551049	0.302761	0.0223164	0.536788	0.0181564	0.999996	0.0279878	0.0181564
lavaan_mediation_preBEP_meta2_milk1421_waz2.csv	preBEP	milk	rLC_neg_mtb_2036504	1421	waz	2	269	-0.0373708	-0.0922387	-0.00129212	0.145987	0.37847	0.136906	0.565092	0.00111018	0.341099	0.121564	0.544407	0.0029527	0.999901	0.0090793	0.00840457
lavaan_mediation_preBEP_meta2_milkpn34_waz4.csv	preBEP	milk	rLC_neg_mtb_2039625	pn34	waz	4	273	0.0638703	0.00692518	0.140651	0.0502019	0.238478	0.0212628	0.474721	0.0444107	0.302348	0.0893971	0.563362	0.0100154	0.999874	0.0446504	0.0259936
lavaan_mediation_preBEP_meta2_milkpn34_weight4.csv	preBEP	milk	rLC_neg_mtb_2039625	pn34	weight	4	274	0.0470356	0.00114857	0.101624	0.0581621	0.267766	0.0561086	0.480883	0.00712823	0.314801	0.11193	0.520585	0.00183006	0.99989	0.00746604	0.00509685
lavaan_mediation_preBEP_meta2_milk1421_weight1.csv	preBEP	milk	rLC_neg_mtb_2068114	1421	weight	1	273	0.0305326	0.00305071	0.0688804	0.0712177	0.161482	0.010283	0.308943	0.0345165	0.192015	0.0383118	0.355641	0.0137955	0.999942	0.0346326	0.0137955
lavaan_mediation_preBEP_meta2_milk1421_weight2.csv	preBEP	milk	rLC_neg_mtb_2068114	1421	weight	2	269	0.0331233	0.000453092	0.0796164	0.090575	0.226576	0.0601733	0.398325	0.00514151	0.259699	0.097668	0.403549	0.00196673	0.99957	0.00559475	0.00443179
lavaan_mediation_preBEP_meta2_milk1421_hc1.csv	preBEP	milk	rLC_neg_mtb_2072948	1421	hc	1	273	-0.485993	-1.23583	-0.0154686	0.108648	3.97578	0.619494	7.26968	0.0167807	3.48979	0.251832	6.39392	0.0387206	0.999956	0.0559935	0.0387206
lavaan_mediation_preBEP_meta2_milk1421_hc2.csv	preBEP	milk	rLC_neg_mtb_2072948	1421	hc	2	269	-0.526548	-1.30531	-0.0535033	0.108213	3.91038	0.603014	7.20268	0.0115781	3.38383	0.0074467	6.90673	0.0319177	0.99976	0.0632079	0.0567548
lavaan_mediation_preBEP_meta2_milk1421_height2.csv	preBEP	milk	rLC_neg_mtb_2072948	1421	height	2	269	-0.105084	-0.260267	-0.0107465	0.103142	0.606774	0.00700678	1.2653	0.0620788	0.50169	-0.134481	1.10757	0.117429	0.999622	0.153265	0.1391
lavaan_mediation_preBEP_meta2_milk1421_muac1.csv	preBEP	milk	rLC_neg_mtb_2072948	1421	muac	1	273	-0.344546	-0.910074	-0.00969582	0.119836	3.09111	0.818612	5.35124	0.00526343	2.74657	0.532279	4.96752	0.0119764	0.999938	0.0195721	0.0119764
lavaan_mediation_preBEP_meta2_milk1421_weight1.csv	preBEP	milk	rLC_neg_mtb_2072948	1421	weight	1	273	-0.0259284	-0.0631971	-0.0018131	0.0830081	0.217943	0.0673105	0.395596	0.0057596	0.192015	0.0383118	0.355641	0.0137955	0.999942	0.0209062	0.0137955
lavaan_mediation_preBEP_meta2_milk1421_weight2.csv	preBEP	milk	rLC_neg_mtb_2072948	1421	weight	2	269	-0.02554	-0.0668991	-0.000727727	0.126023	0.285239	0.104301	0.464368	0.00122631	0.259699	0.0822706	0.422315	0.00318388	0.99957	0.00480993	0.00443179
lavaan_mediation_preBEP_meta2_milk1421_weight2.csv	preBEP	milk	rLC_neg_mtb_2094253	1421	weight	2	269	-0.0269034	-0.0668208	-0.00277262	0.120594	0.286603	0.133003	0.460344	0.000840993	0.259699	0.112816	0.447741	0.00265337	0.99957	0.00480993	0.00443179
lavaan_mediation_preBEP_meta2_milkpn34_muac4.csv	preBEP	milk	rLC_neg_mtb_2108943	pn34	muac	4	274	0.582064	0.0883774	1.32989	0.07676	3.24175	0.571787	5.91607	0.0176454	3.82381	1.25176	6.67034	0.00686331	0.999985	0.0179098	0.0101753
lavaan_mediation_preBEP_meta2_milk1421_whz1.csv	preBEP	milk	rLC_neg_mtb_2149315	1421	whz	1	273	0.0412394	0.0014057	0.104651	0.123625	0.338836	0.0818658	0.640392	0.0115602	0.380075	0.111042	0.664031	0.00434595	0.999975	0.0117373	0.00434596
lavaan_mediation_preBEP_meta2_milk1421_waz2.csv	preBEP	milk	rLC_neg_mtb_2163642	1421	waz	2	269	-0.0162859	-0.0384071	-0.00253532	0.0888674	0.357385	0.153214	0.597482	0.0019721	0.341099	0.146032	0.574696	0.00270923	0.999901	0.0090793	0.00840457
lavaan_mediation_preBEP_meta2_milkpn34_weight4.csv	preBEP	milk	rLC_neg_mtb_2167341	pn34	weight	4	274	-0.0393768	-0.110577	-0.000546106	0.145614	0.354178	0.158276	0.572164	0.00117483	0.314801	0.125049	0.550693	0.00349435	0.99989	0.00558691	0.00509685
lavaan_mediation_preBEP_meta2_milkpn34_whz4.csv	preBEP	milk	rLC_neg_mtb_2167341	pn34	whz	4	274	-0.0428299	-0.115794	-2.40664e-05	0.15145	0.346611	0.0372173	0.65815	0.0264067	0.303781	-0.001223	0.584039	0.0429865	0.999236	0.0445701	0.0441721
lavaan_mediation_preBEP_meta2_milkpn12_hc3.csv	preBEP	milk	rLC_neg_mtb_2197266	pn12	hc	3	281	-0.59995	-1.61809	-0.0196225	0.121519	4.42029	1.1002	7.51444	0.00672005	3.82034	0.541852	6.88218	0.0197046	0.999815	0.0301828	0.0292811
lavaan_mediation_preBEP_meta2_milkpn12_hc4.csv	preBEP	milk	rLC_neg_mtb_2197266	pn12	hc	4	279	-0.543006	-1.43684	-0.0372365	0.121028	4.17744	0.813459	7.4169	0.00770577	3.63443	0.105046	6.84705	0.0211749	0.999946	0.0445986	0.0429732
lavaan_mediation_preBEP_meta2_milkpn12_muac3.csv	preBEP	milk	rLC_neg_mtb_2197266	pn12	muac	3	281	-0.710722	-1.47465	-0.0249078	0.0529306	4.46869	1.8483	6.78478	0.000331206	3.75796	1.2097	6.23203	0.00377748	0.99987	0.00561089	0.00537746
lavaan_mediation_preBEP_meta2_milkpn12_muac4.csv	preBEP	milk	rLC_neg_mtb_2197266	pn12	muac	4	279	-0.577955	-1.44145	-0.059116	0.0856161	4.17906	1.55789	6.64024	0.00132539	3.6011	0.925114	5.89985	0.00604975	0.999954	0.0145241	0.0140702
lavaan_mediation_preBEP_meta2_milkpn12_waz3.csv	preBEP	milk	rLC_neg_mtb_2197266	pn12	waz	3	281	-0.0502472	-0.114339	-0.00179139	0.0840809	0.402424	0.183361	0.621565	0.000421493	0.352177	0.12702	0.57507	0.00212984	0.999934	0.00613642	0.00590481
lavaan_mediation_preBEP_meta2_milkpn12_weight3.csv	preBEP	milk	rLC_neg_mtb_2197266	pn12	weight	3	281	-0.0386278	-0.0936554	-0.00126947	0.0832971	0.345235	0.168101	0.515562	8.84139e-05	0.306608	0.137132	0.499081	0.000698933	0.999986	0.00148176	0.00141749
lavaan_mediation_preBEP_meta2_milkpn12_weight4.csv	preBEP	milk	rLC_neg_mtb_2197266	pn12	weight	4	279	-0.0393301	-0.111104	-0.0033961	0.129302	0.332377	0.121068	0.505447	0.00108528	0.293047	0.076865	0.479821	0.00383302	0.999763	0.00675734	0.00648853
lavaan_mediation_preBEP_meta2_milkpn12_whz4.csv	preBEP	milk	rLC_neg_mtb_2197266	pn12	whz	4	279	-0.0344395	-0.109524	-0.00106418	0.1761	0.298127	0.0259467	0.569981	0.0367149	0.263687	0.00722573	0.55065	0.0568976	0.99991	0.0710943	0.0668527
lavaan_mediation_preBEP_meta2_milk1421_hc1.csv	preBEP	milk	rLC_neg_mtb_2296565	1421	hc	1	273	-0.689859	-1.60368	-0.0623256	0.0751405	4.17965	0.595396	7.16725	0.0148277	3.48979	0.251832	6.39392	0.0387206	0.999956	0.0559935	0.0387206
lavaan_mediation_preBEP_meta2_milkpn12_muac2.csv	preBEP	milk	rLC_neg_mtb_2350280	pn12	muac	2	281	0.41783	0.018573	1.00964	0.0948516	3.27588	1.17579	5.24288	0.00215719	3.69371	1.44999	5.55661	0.000433812	1	0.0023354	0.00173548
lavaan_mediation_preBEP_meta2_milk1421_hc2.csv	preBEP	milk	rLC_neg_mtb_2471187	1421	hc	2	269	-0.631339	-1.34533	-0.0669595	0.0632707	4.01517	0.0142867	6.96753	0.0160481	3.38383	-0.336043	6.53704	0.0460094	0.99976	0.0632079	0.0567548
lavaan_mediation_preBEP_meta2_milkpn34_waz4.csv	preBEP	milk	rLC_neg_mtb_2472150	pn34	waz	4	273	0.0486432	0.00154987	0.108882	0.0641457	0.253705	0.0263229	0.540875	0.040589	0.302348	0.0570517	0.597304	0.0152524	0.999874	0.0411251	0.0259936
lavaan_mediation_preBEP_meta2_milkpn34_weight4.csv	preBEP	milk	rLC_neg_mtb_2472150	pn34	weight	4	274	0.0376793	0.00329482	0.0957415	0.0913181	0.277122	0.0338874	0.484732	0.0092565	0.314801	0.103154	0.530644	0.00311756	0.99989	0.00939337	0.00509685
lavaan_mediation_preBEP_meta2_milk1421_muac1.csv	preBEP	milk	rLC_neg_mtb_2492931	1421	muac	1	273	-0.397352	-0.945808	-0.00835347	0.142266	3.14392	0.792904	5.47096	0.00360137	2.74657	0.532279	4.96752	0.0119764	0.999938	0.0195721	0.0119764
lavaan_mediation_preBEP_meta2_milkpn34_hc4.csv	preBEP	milk	rLC_neg_mtb_2705898	pn34	hc	4	274	-0.481165	-1.22599	-0.00369845	0.161915	4.31444	0.966073	8.35734	0.0144829	3.83328	0.594175	7.91	0.0288036	0.999737	0.0416479	0.0361816
lavaan_mediation_preBEP_meta2_milk1421_waz2.csv	preBEP	milk	rLC_neg_mtb_3553356	1421	waz	2	269	0.0490406	0.00855031	0.126608	0.0952219	0.292059	0.0980647	0.517151	0.00822484	0.341099	0.134807	0.591443	0.00210768	0.999901	0.00971215	0.00840457
lavaan_mediation_preBEP_meta2_milk1421_weight2.csv	preBEP	milk	rLC_neg_mtb_3553356	1421	weight	2	269	0.0288607	0.0036025	0.0745803	0.128177	0.230839	0.0847743	0.398997	0.00480266	0.259699	0.124054	0.442674	0.00116316	0.99957	0.00543088	0.00443179
lavaan_mediation_preBEP_meta2_milkpn34_muac4.csv	preBEP	milk	rLC_neg_mtb_3681509	pn34	muac	4	274	-0.607376	-1.35646	-0.056735	0.0737965	4.43119	1.61227	7.44892	0.0024713	3.82381	1.16526	6.85306	0.00780757	0.999985	0.0116854	0.0102116
lavaan_mediation_preBEP_meta2_milk1421_weight1.csv	preBEP	milk	rLC_neg_mtb_3684887	1421	weight	1	273	0.0272863	0.00449879	0.0701721	0.0784301	0.164728	0.00875741	0.319942	0.0292165	0.192015	0.0383118	0.355641	0.0137955	0.999942	0.0295885	0.0137955
lavaan_mediation_preBEP_meta2_milkpn34_hc4.csv	preBEP	milk	rLC_neg_mtb_3837319	pn34	hc	4	274	0.550022	0.0119463	1.51685	0.123381	3.28326	0.067108	7.1682	0.0513047	3.83328	0.414171	7.26974	0.0258178	0.999737	0.0528447	0.0361816
lavaan_mediation_preBEP_meta2_milkpn34_whz4.csv	preBEP	milk	rLC_neg_mtb_4120785	pn34	whz	4	274	-0.0658421	-0.153771	-0.00784392	0.0734586	0.369623	0.0595193	0.644253	0.0169613	0.303781	-0.0200752	0.557479	0.0363563	0.999236	0.0445701	0.0402792
lavaan_mediation_preBEP_meta2_milkpn34_muac5.csv	preBEP	milk	rLC_neg_mtb_4218056	pn34	muac	5	266	0.463094	0.00455632	1.05309	0.119054	3.12372	0.376691	6.70011	0.0421497	3.58682	0.831954	7.09034	0.0198758	0.999983	0.042182	0.0216396
lavaan_mediation_preBEP_meta2_milkpn12_muac3.csv	preBEP	milk	rLC_neg_mtb_4313871	pn12	muac	3	281	-0.0887556	-0.712706	-0.000653993	0.646203	3.84672	1.60863	6.39143	0.0021682	3.75796	1.27632	6.17477	0.00247205	0.99987	0.00561089	0.0053747
lavaan_mediation_preBEP_meta2_milk1421_height2.csv	preBEP	milk	rLC_neg_mtb_4342415	1421	height	2	269	-0.098103	-0.247783	-0.00884968	0.0877602	0.599793	0.0287909	1.29018	0.0581705	0.50169	-0.0855844	1.14774	0.117162	0.999622	0.153265	0.1391
lavaan_mediation_preBEP_meta2_milk1421_weight1.csv	preBEP	milk	rLC_neg_mtb_4342415	1421	weight	1	273	-0.0297694	-0.0631376	-0.00122476	0.0697164	0.221784	0.053005	0.38437	0.00415101	0.192015	0.0383118	0.355641	0.0137955	0.999942	0.0209062	0.0137955
lavaan_mediation_preBEP_meta2_milk1421_weight2.csv	preBEP	milk	rLC_neg_mtb_4342415	1421	weight	2	269	-0.0288228	-0.0641694	-0.00191035	0.0677264	0.288522	0.145965	0.457154	0.00135874	0.259699	0.10898	0.437115	0.00387525	0.99957	0.00480993	0.00459764
lavaan_mediation_preBEP_meta2_milkpn12_waz3.csv	preBEP	milk	rLC_neg_mtb_4454625	pn12	waz	3	281	-0.0459768	-0.106371	-0.00447585	0.0747909	0.398154	0.160864	0.618799	0.000569544	0.352177	0.115202	0.592542	0.00202027	0.999934	0.00613642	0.00590481
lavaan_mediation_preBEP_meta2_milkpn12_waz4.csv	preBEP	milk	rLC_neg_mtb_4454625	pn12	waz	4	278	-0.0379484	-0.101854	-0.000970765	0.129411	0.32807	0.0343657	0.555722	0.0180929	0.290121	-0.0066321	0.507797	0.0359159	0.999885	0.0308356	0.0361886
lavaan_mediation_preBEP_meta2_milkpn12_weight2.csv	preBEP	milk	rLC_neg_mtb_4454625	pn12	weight	2	281	-0.0290666	-0.0654944	-0.00170814	0.0669661	0.283661	0.122571	0.42816	0.000389144	0.254594	0.0998293	0.404325	0.00143654	1	0.00314094	0.0029603
lavaan_mediation_preBEP_meta2_milkpn12_weight4.csv	preBEP	milk	rLC_neg_mtb_4454625	pn12	weight	4	279	-0.0365038	-0.0843044	-0.00147024	0.0877437	0.32955	0.117828	0.558503	0.00169671	0.293047	0.0938043	0.526168	0.00495828	0.999763	0.00675734	0.00648853
lavaan_mediation_preBEP_meta2_milkpn12_whz4.csv	preBEP	milk	rLC_neg_mtb_4454625	pn12	whz	4	279	-0.0462113	-0.114057	-0.00203623	0.109512	0.309898	0.0322331	0.613655	0.0277789	0.263687	-0.00757	0.560703	0.054287	0.99991	0.0710943	0.0668527
lavaan_mediation_preBEP_meta2_milk1421_height2.csv	preBEP	milk	rLC_neg_mtb_4567076	1421	height	2	269	-0.187507	-0.377574	-0.0492778	0.0291407	0.689197	0.128907	1.3501	0.0345971	0.50169	-0.170689	1.11275	0.129996	0.999622	0.153265	0.139161
lavaan_mediation_preBEP_meta2_milk1421_whz1.csv	preBEP	milk	rLC_neg_mtb_4567076	1421	whz	1	273	0.0702662	0.0110238	0.172781	0.0605855	0.309809	0.0481883	0.591331	0.0232214	0.380075	0.111043	0.664031	0.00434595	0.999975	0.0232409	0.00434596
lavaan_mediation_preBEP_meta2_milkpn12_muac2.csv	preBEP	milk	rLC_neg_mtb_4624186	pn12	muac	2	281	0.433644	0.0658246	1.02865	0.102691	3.26007	0.873737	5.46127	0.00627463	3.69371	1.38671	6.1178	0.00138802	1	0.00628578	0.00178769
lavaan_mediation_preBEP_meta2_milkpn34_whz4.csv	preBEP	milk	rLC_neg_mtb_4654066	pn34	whz	4	274	-0.0469209	-0.119612	-0.0028179	0.0981643	0.350702	0.0530761	0.619279	0.0141295	0.303781	0.013537	0.57743	0.0347758	0.999236	0.0445701	0.0399654
lavaan_mediation_preBEP_meta2_milk1421_waz2.csv	preBEP	milk	rLC_neg_mtb_4655971	1421	waz	2	269	-0.0459182	-0.105918	-0.000944639	0.111882	0.387018	0.15659	0.6232	0.000570224	0.341099	0.110934	0.575521	0.00251511	0.999901	0.0090793	0.00840457
lavaan_mediation_preBEP_meta2_milk1421_whz2.csv	preBEP	milk	rLC_neg_mtb_4655971	1421	whz	2	269	-0.0598394	-0.137323	-0.00514819	0.0903157	0.33705	0.0588563	0.643336	0.0242391	0.27721	-0.00176059	0.56513	0.058986	0.999885	0.106794	0.096018
lavaan_mediation_preBEP_meta2_milkpn34_waz4.csv	preBEP	milk	rLC_neg_mtb_4711306	pn34	waz	4	273	0.0488925	0.00788927	0.108468	0.0394441	0.253455	0.0267566	0.505601	0.0289534	0.302348	0.0521231	0.536147	0.0109344	0.999874	0.0313062	0.0259936
lavaan_mediation_preBEP_meta2_milkpn34_weight4.csv	preBEP	milk	rLC_neg_mtb_4711306	pn34	weight	4	274	0.0368158	0.00800967	0.0834476	0.0716799	0.277986	0.0843051	0.462039	0.00318505	0.314801	0.109727	0.49395	0.00108406	0.99989	0.00558691	0.00509685
lavaan_mediation_preBEP_meta2_milk1421_muac1.csv	preBEP	milk	rLC_neg_mtb_4741641	1421	muac	1	273	-0.400871	-0.967612	-0.0169451	0.136788	3.14744	0.786695	5.27423	0.00440697	2.74657	0.532279	4.96752	0.0119764	0.999938	0.0195721	0.0119764
lavaan_mediation_preBEP_meta2_milk1421_muac2.csv	preBEP	milk	rLC_neg_mtb_4741641	1421	muac	2	269	-0.382596	-0.883161	-0.00120165	0.105178	4.00487	1.88564	6.47505	0.000387504	3.62227	1.44731	6.23684	0.00124127	0.999918	0.00303979	0.00282707
lavaan_mediation_preBEP_meta2_milk1421_waz1.csv	preBEP	milk	rLC_neg_mtb_4741641	1421	waz	1	273	-0.0461834	-0.124424	-0.000110285	0.136461	0.348945	0.0520964	0.586955	0.005264	0.302761	0.0223164	0.536788	0.0181564	0.999996	0.0279878	0.0181564
lavaan_mediation_preBEP_meta2_milkpn12_waz3.csv	preBEP	milk	rLC_neg_mtb_4765236	pn12	waz	3	281	0.0302272	0.00192892	0.0878127	0.186029	0.32195	0.104579	0.536905	0.00386126	0.352177	0.137233	0.578853	0.00146868	0.999934	0.00613642	0.00590481
lavaan_mediation_preBEP_meta2_milk1421_muac2.csv	preBEP	milk	rLC_neg_mtb_4768482	1421	muac	2	269	-0.316976	-0.742416	-0.00583202	0.117198	3.93925	1.84734	6.41774	0.000472212	3.62227	1.67273	5.86877	0.00117346	0.999918	0.00303979	0.00282707
lavaan_mediation_preBEP_meta2_milk1421_muac1.csv	preBEP	milk	rLC_neg_mtb_4772155	1421	muac	1	273	-0.396163	-1.08676	-0.0198095	0.131674	3.14273	0.819201	5.38718	0.0040198	2.74657	0.532279	4.96752	0.0119764	0.999938	0.0195721	0.0119764
lavaan_mediation_preBEP_meta2_milk1421_waz1.csv	preBEP	milk	rLC_neg_mtb_4772155	1421	waz	1	273	-0.0437117	-0.110889	-0.00217604	0.124681	0.346473	0.0579635	0.585679	0.00475612	0.302761	0.0223164	0.536788	0.0181564	0.999996	0.0279878	0.0181564
lavaan_mediation_preBEP_meta2_milk1421_waz2.csv	preBEP	milk	rLC_neg_mtb_4772155	1421	waz	2	269	-0.0436753	-0.0965733	-0.000201685	0.086883	0.384775	0.130894	0.609283	0.00150072	0.341099	0.0787648	0.572269	0.00582024	0.999901	0.0090793	0.00840457
lavaan_mediation_preBEP_meta2_milk1421_weight1.csv	preBEP	milk	rLC_neg_mtb_4772155	1421	weight	1	273	-0.0229378	-0.0645376	-0.000718954	0.154168	0.214953	0.0696301	0.373818	0.00560533	0.192015	0.0383118	0.355641	0.0137955	0.999942	0.0209062	0.0137955
lavaan_mediation_preBEP_meta2_milk1421_muac1.csv	preBEP	milk	rLC_neg_mtb_4773371	1421	muac	1	273	0.524247	0.00425764	1.22937	0.0895112	2.22232	0.125703	4.5112	0.040799	2.74657	0.532279	4.96752	0.0119764	0.999938	0.0408675	0.0119764
lavaan_mediation_preBEP_meta2_milk1421_muac2.csv	preBEP	milk	rLC_neg_mtb_4773371	1421	muac	2	269	0.666861	0.149472	1.35317	0.0370785	2.95541	0.87694	5.46118	0.00837294	3.62227	1.82596	6.15486	0.00119865	0.999918	0.00837996	0.00282707
lavaan_mediation_preBEP_meta2_milk1421_whz1.csv	preBEP	milk	rLC_neg_mtb_4773371	1421	whz	1	273	0.0861438	0.00788918	0.183812	0.0517523	0.293931	0.0522812	0.54934	0.0263768	0.380075	0.111043	0.664031	0.00434595	0.999975	0.0263768	0.00434596
lavaan_mediation_preBEP_meta2_milkpn34_weight4.csv	preBEP	milk	rLC_neg_mtb_4774599	pn34	weight	4	274	0.0464083	0.00650916	0.110932	0.0882275	0.268393	0.0608488	0.490275	0.00903732	0.314801	0.0898879	0.536145	0.002228	0.99989	0.00920677	0.00509685
lavaan_mediation_preBEP_meta2_milk1421_waz1.csv	preBEP	milk	rLC_neg_mtb_4800097	1421	waz	1	273	-0.0460491	-0.109389	-9.45224e-05	0.119475	0.348811	0.042549	0.602725	0.00684693	0.302761	0.0223164	0.536788	0.0181564	0.999996	0.0279878	0.0181564
lavaan_mediation_preBEP_meta2_milk1421_hc1.csv	preBEP	milk	rLC_neg_mtb_4801706	1421	hc	1	273	-0.433602	-1.14397	-0.0211287	0.155529	3.92339	0.627595	6.93792	0.019104	3.48979	0.251832	6.39392	0.0387205	0.999956	0.0559935	0.0387206
lavaan_mediation_preBEP_meta2_milk1421_waz1.csv	preBEP	milk	rLC_neg_mtb_4801706	1421	waz	1	273	-0.0421202	-0.119353	-0.00335119	0.144571	0.344882	0.0873296	0.586944	0.00609778	0.302761	0.0223164	0.536788	0.0181564	0.999996	0.0279878	0.0181564
lavaan_mediation_preBEP_meta2_milk1421_weight1.csv	preBEP	milk	rLC_neg_mtb_4801706	1421	weight	1	273	-0.0242776	-0.0657302	-0.000957752	0.143511	0.216292	0.0773209	0.382358	0.00590731	0.192015	0.0383118	0.355641	0.0137955	0.999942	0.0209062	0.0137955
lavaan_mediation_preBEP_meta2_milk1421_weight2.csv	preBEP	milk	rLC_neg_mtb_4802516	1421	weight	2	269	-0.0251531	-0.0596752	-0.00107617	0.125108	0.284853	0.104967	0.468561	0.000651258	0.259699	0.0802437	0.445674	0.00244311	0.99957	0.00480993	0.00443179
lavaan_mediation_preBEP_meta2_milk1421_hc1.csv	preBEP	milk	rLC_neg_mtb_4851982	1421	hc	1	273	-0.546737	-1.47089	-0.0621849	0.105134	4.03652	0.464036	7.18794	0.0171763	3.48979	0.251832	6.39392	0.0387206	0.999956	0.0559935	0.0387206
lavaan_mediation_preBEP_meta2_milkpn12_hc2.csv	preBEP	milk	rLC_neg_mtb_4915842	pn12	hc	2	281	-0.407758	-1.15667	-0.00512264	0.135212	3.87668	0.654244	6.80514	0.0163777	3.46892	0.29079	6.21057	0.0284468	1	0.0484715	0.0449541
lavaan_mediation_preBEP_meta2_milk1421_whz1.csv	preBEP	milk	rLC_neg_mtb_4916055	1421	whz	1	273	0.047825	0.0013736	0.128543	0.154908	0.33225	0.0655949	0.599217	0.0132868	0.380075	0.111042	0.664031	0.00434595	0.999975	0.0133878	0.00434596
lavaan_mediation_preBEP_meta2_milk1421_muac2.csv	preBEP	milk	rLC_neg_mtb_4940784	1421	muac	2	269	-0.281729	-0.861145	-0.00993199	0.195579	3.904	1.38135	6.3521	0.00154993	3.62227	1.10811	6.00907	0.0029019	0.999918	0.00303979	0.00321331
lavaan_mediation_preBEP_meta2_milk1421_waz2.csv	preBEP	milk	rLC_neg_mtb_4940784	1421	waz	2	269	-0.0319285	-0.0952007	-0.0016569	0.202019	0.373028	0.102061	0.59312	0.00228899	0.341099	0.0549829	0.556917	0.00572301	0.999901	0.0090793	0.00840457
lavaan_mediation_preBEP_meta2_milk1421_weight2.csv	preBEP	milk	rLC_neg_mtb_4940784	1421	weight	2	269	-0.0219007	-0.0654914	-0.000759124	0.18698	0.2816	0.0738482	0.427259	0.00111464	0.259699	0.0672423	0.41831	0.00285414	0.99957	0.00480993	0.00443179
lavaan_mediation_preBEP_meta_milkpn34_stunting6.csv	preBEP	milk	rLC_neg_mtb_4944318	pn34	stunting	6	227	0.214088	0.0235497	0.404627	0.0276507	-0.519731	-1.00087	-0.0385941	0.0342445	-0.305642	-0.795997	0.184713	0.221835	0.999793	0.314501	0.221836
lavaan_mediation_preBEP_meta2_milk1421_muac1.csv	preBEP	milk	rLC_neg_mtb_4962916	1421	muac	1	273	-0.599436	-1.49031	-0.0785743	0.0739647	3.34601	0.862398	6.03287	0.00495698	2.74657	0.532279	4.96752	0.0119764	0.999938	0.0195721	0.0119764
lavaan_mediation_preBEP_meta2_milkpn12_whz3.csv	preBEP	milk	rLC_neg_mtb_4962916	pn12	whz	3	281	-0.0475755	-0.111342	-0.00506838	0.0905252	0.318699	0.0623785	0.673592	0.0230753	0.271123	0.0231204	0.582104	0.0438293	0.999992	0.069455	0.0658317
lavaan_mediation_preBEP_meta2_milkpn34_hc4.csv	preBEP	milk	rLC_neg_mtb_4965001	pn34	hc	4	274	0.430635	0.00584429	1.34355	0.163872	3.40264	0.139473	6.73735	0.0284615	3.83328	0.348469	7.49844	0.0144503	0.999737	0.0416479	0.0361816
lavaan_mediation_preBEP_meta2_milkpn34_weight4.csv	preBEP	milk	rLC_neg_mtb_4987033	pn34	weight	4	274	0.029981	0.00072099	0.0741802	0.111267	0.28482	0.0858988	0.518671	0.00461936	0.314801	0.108853	0.54709	0.0024219	0.99989	0.00578641	0.00509685
lavaan_mediation_preBEP_meta2_milkpn12_weight2.csv	preBEP	milk	rLC_neg_mtb_4993878	pn12	weight	2	281	0.0430215	0.00916106	0.095349	0.0509816	0.211573	0.0400455	0.35052	0.011065	0.254594	0.0948174	0.390521	0.00183218	1	0.011065	0.0029603
lavaan_mediation_preBEP_meta2_milk1421_waz1.csv	preBEP	milk	rLC_neg_mtb_5020684	1421	waz	1	273	-0.0479026	-0.127258	-0.00144819	0.135668	0.350664	0.100179	0.617616	0.00447505	0.302761	0.0223164	0.536788	0.0181564	0.999996	0.0279878	0.0181564
lavaan_mediation_preBEP_meta2_milk1421_weight1.csv	preBEP	milk	rLC_neg_mtb_5020684	1421	weight	1	273	-0.0296699	-0.083129	-0.00073178	0.142364	0.221685	0.074473	0.376854	0.00347547	0.192015	0.0383118	0.355641	0.0137955	0.999942	0.0209062	0.0137955
lavaan_mediation_preBEP_meta2_milkpn12_muac2.csv	preBEP	milk	rLC_neg_mtb_5040322	pn12	muac	2	281	0.297381	0.0173604	0.862704	0.145128	3.39633	1.34765	5.53208	0.00115729	3.69371	1.77547	5.72597	0.000393176	1	0.00183292	0.00173548
lavaan_mediation_preBEP_meta2_milkpn34_muac4.csv	preBEP	milk	rLC_neg_mtb_5042545	pn34	muac	4	274	0.412609	0.0143082	1.00935	0.0719424	3.4112	0.262959	6.1198	0.0154712	3.82381	0.629796	6.21184	0.00652186	0.999985	0.0159987	0.0101753
lavaan_mediation_preBEP_meta2_milk1421_whz1.csv	preBEP	milk	rLC_neg_mtb_5069646	1421	whz	1	273	0.0398243	0.00184024	0.0985676	0.0934073	0.340251	0.0493738	0.597481	0.0129204	0.380075	0.111042	0.664032	0.00434595	0.999975	0.0130296	0.00434596
lavaan_mediation_preBEP_meta2_milk1421_hc2.csv	preBEP	milk	rLC_neg_mtb_5139140	1421	hc	2	269	-0.567896	-1.39092	-0.0446282	0.105347	3.95172	1.1106	7.10879	0.0139472	3.38383	0.62135	6.30149	0.0324192	0.99976	0.0632079	0.0567548
lavaan_mediation_preBEP_meta2_milkpn12_muac2.csv	preBEP	milk	rLC_neg_mtb_5274227	pn12	muac	2	281	0.279595	0.00932193	0.755626	0.164256	3.41412	0.732303	5.53408	0.00266746	3.69371	1.04285	5.90252	0.00148018	1	0.00278292	0.00182512
lavaan_mediation_preBEP_meta2_milkpn34_whz4.csv	preBEP	milk	rLC_neg_mtb_5333556	pn34	whz	4	274	-0.0735103	-0.140235	-0.00191929	0.0395855	0.377292	0.125757	0.687147	0.00413035	0.303781	0.0402705	0.601662	0.019505	0.999236	0.0445701	0.0399654
lavaan_mediation_preBEP_meta2_milkpn12_muac2.csv	preBEP	milk	rLC_neg_mtb_5334294	pn12	muac	2	281	0.278437	6.26401e-06	0.765828	0.139642	3.41527	0.948122	5.56432	0.00312574	3.69371	1.14462	5.90134	0.00131088	1	0.00319375	0.00176296
lavaan_mediation_preBEP_meta2_milkpn12_muac2.csv	preBEP	milk	rLC_neg_mtb_5383578	pn12	muac	2	281	-0.305233	-1.00906	-3.00096e-05	0.246818	3.99894	1.57183	6.42762	0.000780016	3.69371	1.34613	5.88656	0.00135934	1	0.00183292	0.00178328
lavaan_mediation_preBEP_meta2_milkpn12_waz2.csv	preBEP	milk	rLC_neg_mtb_5383578	pn12	waz	2	281	-0.047895	-0.12401	-0.00562855	0.102675	0.402506	0.152677	0.654556	0.00123836	0.354611	0.10438	0.602988	0.00469273	0.999999	0.00621898	0.00571752
lavaan_mediation_preBEP_meta2_milkpn12_weight2.csv	preBEP	milk	rLC_neg_mtb_5383578	pn12	weight	2	281	-0.022841	-0.0714141	-5.7073e-06	0.200481	0.277435	0.110897	0.439733	0.000545356	0.254594	0.0939513	0.410316	0.00133811	1	0.00314094	0.0029603
lavaan_mediation_preBEP_meta2_milkpn12_muac3.csv	preBEP	milk	rLC_neg_mtb_5461236	pn12	muac	3	281	0.359619	0.0189049	0.892141	0.120888	3.39835	0.664018	5.43581	0.00666519	3.75796	1.11764	6.05902	0.00282196	0.99987	0.00704168	0.0053747
lavaan_mediation_preBEP_meta2_milk1421_whz1.csv	preBEP	milk	rLC_neg_mtb_5464434	1421	whz	1	273	0.0429512	0.000308975	0.0990696	0.0838774	0.337124	0.0749707	0.610301	0.0111474	0.380075	0.111042	0.664031	0.00434595	0.999975	0.0113568	0.00434596
lavaan_mediation_preBEP_meta2_milkpn12_hc2.csv	preBEP	milk	rLC_neg_mtb_5657075	pn12	hc	2	281	-0.510315	-1.43618	-0.00315848	0.174984	3.97923	0.316339	8.2061	0.0267644	3.46892	-0.122335	6.97543	0.0432206	1	0.0484715	0.0461702
lavaan_mediation_preBEP_meta2_milkpn12_waz2.csv	preBEP	milk	rLC_neg_mtb_5657075	pn12	waz	2	281	-0.0340294	-0.109025	-0.000348241	0.204171	0.38864	0.159853	0.612246	0.000736611	0.354611	0.124346	0.57915	0.00231353	0.999999	0.00621898	0.00563285
lavaan_mediation_preBEP_meta2_milkpn12_weight2.csv	preBEP	milk	rLC_neg_mtb_5657075	pn12	weight	2	281	-0.0280292	-0.0785916	-0.00280294	0.157141	0.282623	0.12945	0.468447	0.000342511	0.254594	0.101498	0.420512	0.00117092	1	0.00314094	0.0029603
lavaan_mediation_preBEP_meta2_milk1421_height2.csv	preBEP	milk	rLC_neg_mtb_5770650	1421	height	2	269	-0.126968	-0.309589	-0.00231141	0.0918434	0.628658	0.0399451	1.16748	0.0399291	0.50169	-0.128105	1.04122	0.102996	0.999622	0.153265	0.1391
lavaan_mediation_preBEP_meta2_milkpn34_hc4.csv	preBEP	milk	rLC_neg_mtb_5820418	pn34	hc	4	274	-0.722534	-1.62755	-0.124201	0.0546749	4.55581	1.0888	8.06128	0.00460622	3.83328	0.82186	7.23994	0.0140601	0.999737	0.0416479	0.0361816
lavaan_mediation_preBEP_meta2_milk1421_muac1.csv	preBEP	milk	rLC_neg_mtb_58262	1421	muac	1	273	0.411072	0.0281138	1.04739	0.118358	2.3355	0.0721597	4.6869	0.0304428	2.74657	0.532279	4.96752	0.0119764	0.999938	0.0308043	0.0119764
lavaan_mediation_preBEP_meta2_milk1421_muac2.csv	preBEP	milk	rLC_neg_mtb_58262	1421	muac	2	269	0.341929	0.000356014	1.04251	0.168022	3.28034	1.08707	5.6326	0.00332691	3.62227	1.21916	6.35017	0.00170426	0.999918	0.0037236	0.00282707
lavaan_mediation_preBEP_meta2_milk1421_weight1.csv	preBEP	milk	rLC_neg_mtb_58262	1421	weight	1	273	0.025735	0.00130501	0.0612384	0.0923481	0.16628	0.00550312	0.320391	0.0288844	0.192015	0.0383118	0.355641	0.0137955	0.999942	0.0292771	0.0137955
lavaan_mediation_preBEP_meta2_milkpn12_muac2.csv	preBEP	milk	rLC_neg_mtb_5879291	pn12	muac	2	281	0.401215	0.0099772	1.04057	0.133393	3.2925	1.42812	5.66157	0.00208995	3.69371	1.75541	5.97765	0.000563853	1	0.00227793	0.00173548
lavaan_mediation_preBEP_meta2_milkpn12_whz4.csv	preBEP	milk	rLC_neg_mtb_5999113	pn12	whz	4	279	-0.0113136	-0.0336932	-0.000434242	0.212622	0.275001	0.0422832	0.532601	0.0305988	0.263687	0.0210073	0.518823	0.0381125	0.99991	0.0710943	0.0668527
lavaan_mediation_preBEP_meta2_milkpn34_muac4.csv	preBEP	milk	rLC_neg_mtb_6112825	pn34	muac	4	274	0.38432	0.042511	1.10311	0.13416	3.43949	0.713954	6.17792	0.00919997	3.82381	1.15304	6.60195	0.00523027	0.999985	0.0118281	0.0101753
lavaan_mediation_preBEP_meta2_milk1421_waz2.csv	preBEP	milk	rLC_neg_mtb_6247557	1421	waz	2	269	-0.0503921	-0.150413	-0.00236594	0.162108	0.391491	0.133374	0.634275	0.00188104	0.341099	0.0875371	0.603391	0.00498199	0.999901	0.0090793	0.00840457
lavaan_mediation_preBEP_meta2_milkpn12_muac2.csv	preBEP	milk	rLC_neg_mtb_6333558	pn12	muac	2	281	-0.549487	-1.3344	-0.0456816	0.0826959	4.2432	1.96459	6.01143	6.40973e-05	3.69371	1.51501	5.46221	0.00055559	1	0.00183292	0.00173548
lavaan_mediation_preBEP_meta2_milkpn12_waz2.csv	preBEP	milk	rLC_neg_mtb_6333558	pn12	waz	2	281	-0.0500118	-0.147775	-0.002415	0.1182	0.404623	0.165379	0.642794	0.000875434	0.354611	0.098606	0.586333	0.00272962	0.999999	0.00621898	0.00563285
lavaan_mediation_preBEP_meta2_milkpn12_hc3.csv	preBEP	milk	rLC_neg_mtb_6361405	pn12	hc	3	281	-0.330182	-0.744578	-0.0214268	0.0897681	4.15052	0.673345	7.4484	0.0118323	3.82034	0.351378	6.93457	0.0183704	0.999815	0.0301828	0.0292811
lavaan_mediation_preBEP_meta2_milkpn12_muac2.csv	preBEP	milk	rLC_neg_mtb_6379567	pn12	muac	2	281	-0.285436	-0.848358	-0.00023825	0.195187	3.97915	1.58977	6.21537	0.000535912	3.69371	1.55938	5.71669	0.000708982	1	0.00183292	0.00173548
lavaan_mediation_preBEP_meta2_milkpn12_muac3.csv	preBEP	milk	rLC_neg_mtb_6419699	pn12	muac	3	281	-0.458976	-1.14713	-0.0472584	0.0925262	4.21694	1.58746	6.43643	0.000724908	3.75796	1.34057	5.95706	0.00213762	0.99987	0.00561089	0.0053747
lavaan_mediation_preBEP_meta2_milkpn12_muac4.csv	preBEP	milk	rLC_neg_mtb_6419699	pn12	muac	4	279	-0.52209	-1.54493	-0.0739331	0.141937	4.12319	1.17166	7.33421	0.00649758	3.6011	0.641519	6.39341	0.0150587	0.999954	0.0145241	0.0157354
lavaan_mediation_preBEP_meta2_milkpn12_hc2.csv	preBEP	milk	rLC_neg_mtb_6673225	pn12	hc	2	281	-0.396547	-0.872088	-0.0176329	0.0711107	3.86547	0.268539	6.92786	0.0214355	3.46892	0.0370969	6.74053	0.0385351	1	0.0484715	0.0449541
lavaan_mediation_preBEP_meta2_milkpn12_muac2.csv	preBEP	milk	rLC_neg_mtb_6704225	pn12	muac	2	281	-0.724718	-1.46017	-0.26198	0.0288984	4.41843	2.33827	6.72484	8.1614e-05	3.69371	1.2407	6.05922	0.00116223	1	0.00183292	0.00173985
lavaan_mediation_preBEP_meta2_milkpn12_waz2.csv	preBEP	milk	rLC_neg_mtb_6704225	pn12	waz	2	281	-0.0433673	-0.115447	-0.00122438	0.141746	0.397978	0.117834	0.648575	0.000928958	0.354611	0.0677554	0.615773	0.00258258	0.999999	0.00621898	0.00563285
lavaan_mediation_preBEP_meta2_milkpn12_muac2.csv	preBEP	milk	rLC_neg_mtb_6790060	pn12	muac	2	281	-0.696401	-1.55873	-0.22153	0.0397937	4.39011	2.08987	6.44367	7.81683e-05	3.69371	1.25688	5.82387	0.000560008	1	0.00183292	0.00173548
lavaan_mediation_preBEP_meta2_milkpn12_waz2.csv	preBEP	milk	rLC_neg_mtb_6790060	pn12	waz	2	281	-0.0523762	-0.141843	-0.000890655	0.134396	0.406987	0.18168	0.663656	0.00107082	0.354611	0.133385	0.617233	0.00285046	0.999999	0.00621898	0.00563285
lavaan_mediation_preBEP_meta2_milkpn34_hc4.csv	preBEP	milk	rLC_neg_mtb_6793455	pn34	hc	4	274	0.472913	0.00615233	1.38056	0.168693	3.36037	0.479221	7.02035	0.0362208	3.83328	0.94149	7.87816	0.019357	0.999737	0.0421565	0.0361816
lavaan_mediation_preBEP_meta2_milkpn12_hc2.csv	preBEP	milk	rLC_neg_mtb_6986857	pn12	hc	2	281	-0.238277	-0.997288	-0.00132275	0.385307	3.7072	0.595983	7.1854	0.029151	3.46892	0.206962	6.89585	0.0413375	1	0.0484715	0.0457775
lavaan_mediation_preBEP_meta2_milkpn12_muac2.csv	preBEP	milk	rLC_neg_mtb_7155692	pn12	muac	2	281	0.422555	0.0496185	0.958974	0.066502	3.27116	1.12282	5.50676	0.00178519	3.69371	1.52416	5.85596	0.000665969	1	0.00206602	0.00173548
lavaan_mediation_preBEP_meta2_milk1421_muac1.csv	preBEP	milk	rLC_neg_mtb_7289494	1421	muac	1	273	0.404125	0.0127478	0.909064	0.103223	2.34244	0.0207628	4.62957	0.0312967	2.74657	0.532279	4.96752	0.0119764	0.999938	0.0315879	0.0119764
lavaan_mediation_preBEP_meta2_milk1421_muac2.csv	preBEP	milk	rLC_neg_mtb_7289494	1421	muac	2	269	0.598206	0.100419	1.23221	0.0347971	3.02407	0.728142	5.3495	0.00644862	3.62227	1.15729	5.97259	0.00136308	0.999918	0.00649215	0.00282707
lavaan_mediation_preBEP_meta2_milkpn34_waz4.csv	preBEP	milk	rLC_neg_mtb_7500390	pn34	waz	4	273	-0.0415437	-0.116324	-0.000800178	0.162207	0.343892	0.0930064	0.651932	0.00842658	0.302348	0.0507949	0.627745	0.0174567	0.999874	0.0288058	0.0259936
lavaan_mediation_preBEP_meta2_milkpn34_muac4.csv	preBEP	milk	rLC_neg_mtb_7508426	pn34	muac	4	274	0.969729	0.0332972	2.16127	0.0628993	2.85408	0.473776	5.62534	0.029788	3.82381	1.40365	6.44438	0.0042534	0.999985	0.029788	0.0101753
lavaan_mediation_preBEP_meta2_milkpn34_weight4.csv	preBEP	milk	rLC_neg_mtb_7508426	pn34	weight	4	274	0.0739894	0.0144329	0.152381	0.0376787	0.240812	0.0625455	0.501521	0.0206763	0.314801	0.110765	0.55812	0.00233746	0.99989	0.0206763	0.00509685
lavaan_mediation_preBEP_meta2_milk1421_muac1.csv	preBEP	milk	rLC_neg_mtb_7681590	1421	muac	1	273	0.410233	0.0340982	0.876179	0.0604399	2.33634	0.0782623	4.56706	0.0335941	2.74657	0.532279	4.96752	0.0119764	0.999938	0.0337131	0.0119764
lavaan_mediation_preBEP_meta2_milk1421_weight1.csv	preBEP	milk	rLC_neg_mtb_7681590	1421	weight	1	273	0.0315916	0.00368436	0.0719663	0.0563366	0.160423	0.0127001	0.320157	0.0370857	0.192015	0.0383118	0.355641	0.0137955	0.999942	0.0371791	0.0137955
lavaan_mediation_preBEP_meta2_milkpn12_whz2.csv	preBEP	milk	rLC_neg_mtb_7693842	pn12	whz	2	281	-0.041769	-0.116504	-0.00245528	0.182401	0.310366	0.044448	0.586748	0.0347694	0.268597	-0.0109835	0.548074	0.0687964	0.999999	0.0995334	0.0926577
lavaan_mediation_preBEP_meta2_milk1421_whz2.csv	preBEP	milk	rLC_neg_mtb_7888598	1421	whz	2	269	-0.0627994	-0.142671	-0.00696419	0.0729295	0.34001	0.0479666	0.65068	0.0242169	0.27721	-0.0120625	0.59238	0.0687444	0.999885	0.106794	0.096018
lavaan_mediation_preBEP_meta2_milkpn34_muac4.csv	preBEP	milk	rLC_neg_mtb_7989674	pn34	muac	4	274	-0.618603	-1.5033	-0.0697167	0.100168	4.44241	1.89113	7.46179	0.0013886	3.82381	1.33617	6.79125	0.00696564	0.999985	0.0116854	0.0101753
lavaan_mediation_preBEP_meta2_milkpn34_weight4.csv	preBEP	milk	rLC_neg_mtb_8106242	pn34	weight	4	274	0.03068	0.000329972	0.0777641	0.116247	0.284121	0.0722897	0.488276	0.0052446	0.314801	0.113931	0.528029	0.00249325	0.99989	0.00615014	0.00509685
lavaan_mediation_preBEP_meta2_milkpn12_waz4.csv	preBEP	milk	rLC_neg_mtb_859909	pn12	waz	4	278	0.018621	8.79101e-05	0.0430684	0.109054	0.2715	0.0355658	0.524115	0.0196033	0.290121	0.0508345	0.545287	0.0126317	0.999885	0.0308356	0.0295301
lavaan_mediation_preBEP_meta2_milk1421_weight1.csv	preBEP	milk	rLC_neg_mtb_916720	1421	weight	1	273	0.0069716	0.00383098	0.0483932	0.559688	0.185043	0.0262602	0.345047	0.0190377	0.192015	0.0383118	0.355641	0.0137955	0.999942	0.0213352	0.0137955
lavaan_mediation_preBEP_meta2_milk1421_weight2.csv	preBEP	milk	rLC_neg_mtb_916720	1421	weight	2	269	0.0166988	0.000269001	0.0493295	0.154963	0.243001	0.0796576	0.370223	0.00118303	0.259699	0.105204	0.386532	0.000642145	0.99957	0.00480993	0.00443179
lavaan_mediation_preBEP_meta2_milk1421_whz1.csv	preBEP	milk	rLC_neg_mtb_9569352	1421	whz	1	273	0.0647359	0.00647187	0.146051	0.0582848	0.315339	0.0356179	0.586658	0.0202409	0.380075	0.111042	0.664031	0.00434595	0.999975	0.0202919	0.00434596
lavaan_mediation_preBEP_meta2_milkpn12_hc2.csv	preBEP	milk	rLC_pos_mtb_10007784	pn12	hc	2	281	0.703564	0.102917	1.67543	0.0660097	2.76535	0.484179	5.8276	0.0640208	3.46892	0.849205	6.58418	0.0217505	1	0.0648844	0.0449541
lavaan_mediation_preBEP_meta2_milkpn12_muac2.csv	preBEP	milk	rLC_pos_mtb_10007784	pn12	muac	2	281	0.459654	0.0751119	1.06857	0.072481	3.23406	0.809068	5.13552	0.00299462	3.69371	1.51394	5.71771	0.000942972	1	0.00307371	0.00173548
lavaan_mediation_preBEP_meta2_milkpn34_muac5.csv	preBEP	milk	rLC_pos_mtb_10040225	pn34	muac	5	266	0.650293	0.087404	1.57204	0.0782075	2.93652	0.337336	5.89651	0.0369165	3.58682	0.749589	6.51029	0.0136095	0.999983	0.0370016	0.0209441
lavaan_mediation_preBEP_meta2_milkpn34_muac4.csv	preBEP	milk	rLC_pos_mtb_1181693	pn34	muac	4	274	-0.678483	-1.41045	-0.135733	0.0513429	4.50229	1.63614	7.32094	0.000646039	3.82381	1.24003	6.19568	0.00376034	0.999985	0.0116854	0.0101753
lavaan_mediation_preBEP_meta2_milkpn34_waz4.csv	preBEP	milk	rLC_pos_mtb_1181693	pn34	waz	4	273	-0.0510051	-0.110085	-0.000936559	0.0748517	0.353353	0.107107	0.628961	0.00928449	0.302348	0.0500082	0.576013	0.0259105	0.999874	0.0288058	0.0277581
lavaan_mediation_preBEP_meta2_milkpn34_weight4.csv	preBEP	milk	rLC_pos_mtb_1181693	pn34	weight	4	274	-0.0488059	-0.101241	-0.0054532	0.0384319	0.363607	0.158922	0.545988	0.000377665	0.314801	0.105877	0.497702	0.00235738	0.99989	0.00558691	0.00509685
lavaan_mediation_preBEP_meta2_milkpn34_whz4.csv	preBEP	milk	rLC_pos_mtb_1181693	pn34	whz	4	274	-0.0538894	-0.119738	-0.00766565	0.0560423	0.357671	0.0335823	0.658711	0.0148057	0.303781	-0.0233588	0.571464	0.0348581	0.999236	0.0445701	0.0399654
lavaan_mediation_preBEP_meta2_milk1421_hc2.csv	preBEP	milk	rLC_pos_mtb_1209516	1421	hc	2	269	-0.391299	-0.989011	-0.0182327	0.11619	3.77513	0.631101	6.96038	0.0199314	3.38383	0.195418	6.51234	0.0363621	0.99976	0.0632079	0.0567548
lavaan_mediation_preBEP_meta2_milk1421_hc1.csv	preBEP	milk	rLC_pos_mtb_1554380	1421	hc	1	273	-0.671667	-1.54364	-0.0635883	0.0538244	4.16145	0.695614	7.51312	0.0147511	3.48979	0.251832	6.39392	0.0387206	0.999956	0.0559935	0.0387206
lavaan_mediation_preBEP_meta2_milk1421_hc2.csv	preBEP	milk	rLC_pos_mtb_1554380	1421	hc	2	269	-0.668936	-1.52354	-0.0556219	0.0725965	4.05276	0.817787	7.35721	0.011258	3.38383	0.0127538	6.8685	0.0353485	0.99976	0.0632079	0.0567548
lavaan_mediation_preBEP_meta2_milk1421_height2.csv	preBEP	milk	rLC_pos_mtb_1554380	1421	height	2	269	-0.113312	-0.260874	-0.00572449	0.0741538	0.615001	0.0863053	1.32345	0.0431389	0.50169	-0.105788	1.20358	0.11067	0.999622	0.153265	0.1391
lavaan_mediation_preBEP_meta2_milk1421_muac1.csv	preBEP	milk	rLC_pos_mtb_1582912	1421	muac	1	273	0.681719	0.0370775	1.55475	0.0453262	2.06485	0.0792927	4.35917	0.0521336	2.74657	0.532279	4.96752	0.0119764	0.999938	0.0521336	0.0119764
lavaan_mediation_preBEP_meta2_milk1421_weight1.csv	preBEP	milk	rLC_pos_mtb_1582912	1421	weight	1	273	0.0411905	0.000788702	0.0979985	0.0618824	0.150824	0.0106488	0.309725	0.0452298	0.192015	0.0383118	0.355641	0.0137955	0.999942	0.0452298	0.0137955
lavaan_mediation_preBEP_meta2_milk1421_whz1.csv	preBEP	milk	rLC_pos_mtb_1582912	1421	whz	1	273	0.0735239	0.00351519	0.167421	0.0792439	0.306551	0.0506711	0.590845	0.0212262	0.380075	0.111042	0.664031	0.00434595	0.999975	0.0212619	0.00434596
lavaan_mediation_preBEP_meta2_milkpn12_muac4.csv	preBEP	milk	rLC_pos_mtb_1756040	pn12	muac	4	279	-0.340757	-0.838713	-0.0258535	0.105381	3.94186	1.05449	6.59481	0.00438642	3.6011	0.75058	6.19417	0.00818056	0.999954	0.0145241	0.0140702
lavaan_mediation_preBEP_meta2_milkpn12_waz4.csv	preBEP	milk	rLC_pos_mtb_1756040	pn12	waz	4	278	-0.0338392	-0.0871782	-0.00549225	0.0769737	0.323961	0.0528688	0.620635	0.0198684	0.290121	0.0246437	0.583325	0.0357366	0.999885	0.0308356	0.0360494
lavaan_mediation_preBEP_meta2_milkpn12_weight4.csv	preBEP	milk	rLC_pos_mtb_1756040	pn12	weight	4	279	-0.0267398	-0.0731106	-0.00299321	0.112135	0.319786	0.110755	0.518728	0.00210273	0.293047	0.0769215	0.482721	0.00420598	0.999763	0.00675734	0.00648853
lavaan_mediation_preBEP_meta2_milk1421_hc2.csv	preBEP	milk	rLC_pos_mtb_1793772	1421	hc	2	269	-0.464203	-1.22467	-0.0111632	0.13366	3.84803	0.669091	7.2931	0.014773	3.38383	0.476904	6.72997	0.0345646	0.99976	0.0632079	0.0567548
lavaan_mediation_preBEP_meta2_milk1421_height2.csv	preBEP	milk	rLC_pos_mtb_1793772	1421	height	2	269	-0.133883	-0.310191	-0.00935575	0.0982376	0.635573	0.0056226	1.30187	0.0421704	0.50169	-0.104078	1.15031	0.112375	0.999622	0.153265	0.1391
lavaan_mediation_preBEP_meta2_milk1421_waz2.csv	preBEP	milk	rLC_pos_mtb_1793772	1421	waz	2	269	-0.0514174	-0.124387	-0.00332821	0.099201	0.392517	0.162329	0.588457	0.000368148	0.341099	0.104582	0.555241	0.00176419	0.999901	0.0090793	0.00840457
lavaan_mediation_preBEP_meta2_milk1421_weight2.csv	preBEP	milk	rLC_pos_mtb_1793772	1421	weight	2	269	-0.0357021	-0.0919134	-0.00242243	0.102102	0.295402	0.126776	0.447032	0.000242155	0.259699	0.0993078	0.416468	0.00134015	0.99957	0.00480993	0.00443179
lavaan_mediation_preBEP_meta2_milk1421_whz1.csv	preBEP	milk	rLC_pos_mtb_2365407	1421	whz	1	273	-0.0487501	-0.132714	-0.00378143	0.114231	0.428825	0.165125	0.698664	0.00125573	0.380075	0.111043	0.664031	0.00434595	0.999975	0.00734345	0.00434596
lavaan_mediation_preBEP_meta2_milk1421_whz2.csv	preBEP	milk	rLC_pos_mtb_2365407	1421	whz	2	269	-0.0702486	-0.145862	-0.00805584	0.0469862	0.347459	0.0764034	0.627582	0.0172282	0.27721	3.47353e-05	0.591501	0.0603091	0.999885	0.106794	0.096018
lavaan_mediation_preBEP_meta2_milk1421_weight2.csv	preBEP	milk	rLC_pos_mtb_2861005	1421	weight	2	269	-0.0270304	-0.0637747	-0.000113707	0.0898526	0.28673	0.106022	0.460275	0.00156433	0.259699	0.0969615	0.433351	0.00283589	0.99957	0.00480993	0.00443179
lavaan_mediation_preBEP_meta2_milk1421_whz2.csv	preBEP	milk	rLC_pos_mtb_2861005	1421	whz	2	269	-0.0496694	-0.113457	-0.000167612	0.104366	0.32688	0.0327182	0.620513	0.0350854	0.27721	-0.00376434	0.559745	0.0701025	0.999885	0.106794	0.096018
lavaan_mediation_preBEP_meta2_milkpn34_weight4.csv	preBEP	milk	rLC_pos_mtb_2981337	pn34	weight	4	274	0.0281951	0.00118487	0.0701786	0.0865238	0.286606	0.0781252	0.477202	0.00520353	0.314801	0.117014	0.497436	0.00170917	0.99989	0.00614496	0.00509685
lavaan_mediation_preBEP_meta2_milkpn34_whz4.csv	preBEP	milk	rLC_pos_mtb_2981337	pn34	whz	4	274	0.0683503	0.00416705	0.158901	0.0635139	0.235431	0.00842176	0.508861	0.0753698	0.303781	0.0300263	0.575817	0.0228126	0.999236	0.0754276	0.0399654
lavaan_mediation_preBEP_meta2_milk1421_waz1.csv	preBEP	milk	rLC_pos_mtb_2988097	1421	waz	1	273	-0.0500135	-0.133926	-0.00401362	0.107191	0.352775	0.049292	0.584457	0.00636733	0.302761	0.0223164	0.536788	0.0181564	0.999996	0.0279878	0.0181564
lavaan_mediation_preBEP_meta2_milkpn34_muac4.csv	preBEP	milk	rLC_pos_mtb_3136537	pn34	muac	4	274	0.344975	0.00678934	1.11166	0.23905	3.47883	1.13374	6.42221	0.00833325	3.82381	1.33974	6.7681	0.00391186	0.999985	0.0118281	0.0101753
lavaan_mediation_preBEP_meta2_milk1421_muac1.csv	preBEP	milk	rLC_pos_mtb_3259518	1421	muac	1	273	-0.385676	-0.935776	-0.00375465	0.098652	3.13225	0.939089	5.37847	0.00450384	2.74657	0.532279	4.96752	0.0119764	0.999938	0.0195721	0.0119764
lavaan_mediation_preBEP_meta2_milk1421_whz1.csv	preBEP	milk	rLC_pos_mtb_3259518	1421	whz	1	273	-0.0485082	-0.128806	-0.00349274	0.107774	0.428583	0.149904	0.68949	0.00134796	0.380075	0.111042	0.664031	0.00434595	0.999975	0.00734345	0.00434596
lavaan_mediation_preBEP_meta2_milkpn12_hc3.csv	preBEP	milk	rLC_pos_mtb_3429721	pn12	hc	3	281	-0.496095	-1.10921	-0.0252615	0.0701052	4.31644	1.0187	7.59462	0.00756598	3.82034	0.598805	6.86719	0.0151497	0.999815	0.0301828	0.0292811
lavaan_mediation_preBEP_meta2_milkpn12_hc4.csv	preBEP	milk	rLC_pos_mtb_3429721	pn12	hc	4	279	-0.530247	-1.18174	-0.117312	0.0653582	4.16468	0.722461	7.51827	0.0162479	3.63443	0.243372	6.94503	0.0274968	0.999946	0.0445986	0.0429732
lavaan_mediation_preBEP_meta2_milkpn12_height4.csv	preBEP	milk	rLC_pos_mtb_3429721	pn12	height	4	279	-0.0668179	-0.173555	-0.000988217	0.118468	0.567274	0.00271363	1.198	0.0594732	0.500456	-0.0418911	1.10026	0.0877531	0.999968	0.142904	0.135889
lavaan_mediation_preBEP_meta2_milk1421_whz1.csv	preBEP	milk	rLC_pos_mtb_3488007	1421	whz	1	273	-0.0609367	-0.124697	-0.00390127	0.0560059	0.441012	0.178794	0.711456	0.00106916	0.380075	0.111042	0.664031	0.00434595	0.999975	0.00734345	0.00434596
lavaan_mediation_preBEP_meta2_milk1421_whz2.csv	preBEP	milk	rLC_pos_mtb_3488007	1421	whz	2	269	-0.0612569	-0.151862	-0.00956047	0.0820511	0.338467	0.0392758	0.640378	0.0286592	0.27721	-0.0163823	0.562409	0.0589846	0.999885	0.106794	0.096018
lavaan_mediation_preBEP_meta2_milkpn12_muac2.csv	preBEP	milk	rLC_pos_mtb_3585176	pn12	muac	2	281	0.292194	0.00228497	0.724763	0.105531	3.40152	0.740612	5.9244	0.00785491	3.69371	1.2679	6.12108	0.00342325	1	0.00785491	0.0034367
lavaan_mediation_preBEP_meta2_milkpn34_hc4.csv	preBEP	milk	rLC_pos_mtb_4159213	pn34	hc	4	274	0.134262	0.020074	0.645832	0.362084	3.69902	0.124038	7.02471	0.0329971	3.83328	0.352579	7.19817	0.0271137	0.999737	0.0416569	0.0361816
lavaan_mediation_preBEP_meta2_milkpn34_waz4.csv	preBEP	milk	rLC_pos_mtb_4159213	pn34	waz	4	273	0.0160833	0.00259421	0.0608977	0.231566	0.286265	0.0302657	0.507043	0.0170978	0.302348	0.0528441	0.533609	0.0112516	0.999874	0.0288058	0.0259936
lavaan_mediation_preBEP_meta2_milkpn34_weight4.csv	preBEP	milk	rLC_pos_mtb_4159213	pn34	weight	4	274	0.0127121	0.000603652	0.0432137	0.219745	0.302089	0.0563141	0.551424	0.010436	0.314801	0.0717327	0.5663	0.00745076	0.99989	0.0105085	0.00756681
lavaan_mediation_preBEP_meta2_milkpn12_waz2.csv	preBEP	milk	rLC_pos_mtb_4417692	pn12	waz	2	281	0.0332054	0.00120724	0.0879885	0.121855	0.321405	0.0635605	0.590774	0.00862484	0.354611	0.0978844	0.610179	0.00500335	0.999999	0.00889313	0.00584146
lavaan_mediation_preBEP_meta2_milkpn34_whz4.csv	preBEP	milk	rLC_pos_mtb_4513200	pn34	whz	4	274	-0.0430249	-0.0921237	-8.27864e-05	0.0924397	0.346806	0.0668686	0.594727	0.013165	0.303781	0.0510662	0.549573	0.0232211	0.999236	0.0445701	0.0399654
lavaan_mediation_preBEP_meta2_milkpn12_waz2.csv	preBEP	milk	rLC_pos_mtb_4813295	pn12	waz	2	281	0.0389847	0.0049067	0.0970721	0.1006	0.315626	0.0845185	0.564881	0.00699756	0.354611	0.112271	0.602899	0.00189112	0.999999	0.00749644	0.00563285
lavaan_mediation_preBEP_meta2_milkpn12_weight2.csv	preBEP	milk	rLC_pos_mtb_4813295	pn12	weight	2	281	0.0237673	0.00115516	0.0568431	0.102033	0.230827	0.0800552	0.387267	0.00455589	0.254594	0.109967	0.429212	0.00144192	1	0.00475415	0.0029603
lavaan_mediation_preBEP_meta2_milk1421_muac2.csv	preBEP	milk	rLC_pos_mtb_483600	1421	muac	2	269	0.382135	0.0254065	0.842149	0.0748294	3.24014	0.960599	5.80175	0.00600672	3.62227	1.35901	6.01393	0.00205323	0.999918	0.00606262	0.00283633
lavaan_mediation_preBEP_meta2_milkpn12_weight3.csv	preBEP	milk	rLC_pos_mtb_4980904	pn12	weight	3	281	0.00176629	0.00025106	0.0308442	0.845307	0.304841	0.125347	0.468493	0.00099453	0.306608	0.128313	0.484268	0.000836907	0.999986	0.00149692	0.00141749
lavaan_mediation_preBEP_meta2_milkpn34_muac4.csv	preBEP	milk	rLC_pos_mtb_5010965	pn34	muac	4	274	-0.459057	-1.08372	-0.0199749	0.11031	4.28287	1.53232	6.86675	0.00145695	3.82381	1.16355	6.51804	0.00388736	0.999985	0.0116854	0.0101753
lavaan_mediation_preBEP_meta2_milkpn12_whz2.csv	preBEP	milk	rLC_pos_mtb_5080356	pn12	whz	2	281	-0.047043	-0.111163	-0.00067288	0.0898699	0.31564	0.00317322	0.607414	0.0302986	0.268597	-0.0404944	0.575421	0.0654105	0.999999	0.0995334	0.0926577
lavaan_mediation_preBEP_meta2_milkpn12_waz2.csv	preBEP	milk	rLC_pos_mtb_5310734	pn12	waz	2	281	0.0471164	0.00265141	0.113913	0.103318	0.307494	0.0457126	0.571072	0.0144001	0.354611	0.10296	0.61979	0.00608732	0.999999	0.0144257	0.00650893
lavaan_mediation_preBEP_meta2_milkpn34_whz4.csv	preBEP	milk	rLC_pos_mtb_5386840	pn34	whz	4	274	-0.0446435	-0.120021	-0.000288674	0.134974	0.348425	0.151281	0.642353	0.00421915	0.303781	0.105454	0.616806	0.0154143	0.999236	0.0445701	0.0399654
lavaan_mediation_preBEP_meta2_milkpn34_height4.csv	preBEP	milk	rLC_pos_mtb_5709	pn34	height	4	274	-0.124024	-0.303033	-0.0195151	0.0966657	0.588612	0.0130089	1.34734	0.0719383	0.464589	-0.0698054	1.17396	0.145406	0.999287	0.190977	0.173728
lavaan_mediation_preBEP_meta2_milkpn34_waz4.csv	preBEP	milk	rLC_pos_mtb_5709	pn34	waz	4	273	-0.0457266	-0.122547	-0.00534638	0.143043	0.348075	0.11746	0.59985	0.00631585	0.302348	0.0658623	0.522557	0.0142922	0.999874	0.0288058	0.0259936
lavaan_mediation_preBEP_meta2_milkpn34_weight4.csv	preBEP	milk	rLC_pos_mtb_5709	pn34	weight	4	274	-0.0412004	-0.113482	-0.000606022	0.153462	0.356002	0.104261	0.612908	0.00244146	0.314801	0.0937524	0.556974	0.00441821	0.99989	0.00558691	0.00528309
lavaan_mediation_preBEP_meta2_milkpn12_waz2.csv	preBEP	milk	rLC_pos_mtb_5889274	pn12	waz	2	281	0.0496369	0.0074994	0.118795	0.0755347	0.304974	0.0976187	0.550431	0.0106289	0.354611	0.12347	0.595736	0.00299716	0.999999	0.0107529	0.00563285
lavaan_mediation_preBEP_meta2_milkpn12_muac2.csv	preBEP	milk	rLC_pos_mtb_7258182	pn12	muac	2	281	0.374739	0.0485219	0.863406	0.0846381	3.31897	1.18827	5.89947	0.00319054	3.69371	1.58527	6.25425	0.000908043	1	0.00325112	0.00173548
lavaan_mediation_preBEP_meta2_milkpn12_waz2.csv	preBEP	milk	rLC_pos_mtb_7258182	pn12	waz	2	281	0.0442708	0.00461951	0.094631	0.065711	0.31034	0.0861219	0.563951	0.0122091	0.354611	0.123405	0.613065	0.00408704	0.999999	0.0122635	0.00563637
lavaan_mediation_preBEP_meta2_milkpn34_muac5.csv	preBEP	milk	rLC_pos_mtb_7258182	pn34	muac	5	266	0.6523	0.0449209	1.58627	0.139933	2.93452	0.304118	5.92543	0.0374888	3.58682	0.819648	7.07921	0.0142769	0.999983	0.0375463	0.0209441
lavaan_mediation_preBEP_meta2_milk1421_hc1.csv	preBEP	milk	rLC_pos_mtb_931642	1421	hc	1	273	-0.491515	-1.19558	-0.0222914	0.104632	3.9813	0.343566	7.17393	0.0204741	3.48979	0.251832	6.39392	0.0387205	0.999956	0.0559935	0.0387206
lavaan_mediation_preBEP_meta2_milk1421_muac1.csv	preBEP	milk	rLC_pos_mtb_931642	1421	muac	1	273	-0.72604	-1.44428	-0.0817788	0.0289079	3.47261	1.36217	5.62482	0.0013875	2.74657	0.532279	4.96752	0.0119764	0.999938	0.0195721	0.0119764
lavaan_mediation_preBEP_meta2_milk1421_muac2.csv	preBEP	milk	rLC_pos_mtb_931642	1421	muac	2	269	-0.573915	-1.03419	-0.116215	0.0111386	4.19619	1.91999	6.33395	0.000177608	3.62227	1.22979	5.72656	0.00140909	0.999918	0.00303979	0.00282707
lavaan_mediation_preBEP_meta2_milk1421_waz1.csv	preBEP	milk	rLC_pos_mtb_931642	1421	waz	1	273	-0.0899728	-0.174893	-0.0122463	0.0240037	0.392734	0.120731	0.611853	0.00130279	0.302761	0.0223164	0.536788	0.0181564	0.999996	0.0279878	0.0181564
lavaan_mediation_preBEP_meta2_milk1421_waz2.csv	preBEP	milk	rLC_pos_mtb_931642	1421	waz	2	269	-0.0697111	-0.116377	-0.0159797	0.00665366	0.41081	0.180191	0.658122	0.000365616	0.341099	0.112084	0.618963	0.00428941	0.999901	0.0090793	0.00840457
lavaan_mediation_preBEP_meta2_milk1421_weight1.csv	preBEP	milk	rLC_pos_mtb_931642	1421	weight	1	273	-0.0516087	-0.101132	-0.00706231	0.0262288	0.243623	0.0876223	0.407201	0.00142982	0.192015	0.0383119	0.355641	0.0137955	0.999942	0.0209062	0.0137955
lavaan_mediation_preBEP_meta2_milk1421_weight2.csv	preBEP	milk	rLC_pos_mtb_931642	1421	weight	2	269	-0.0443516	-0.0777517	-0.00975869	0.00788486	0.304051	0.163232	0.493539	0.000211354	0.259699	0.109213	0.449013	0.00192481	0.99957	0.00480993	0.00443179
lavaan_mediation_preBEP_meta2_milk1421_whz1.csv	preBEP	milk	rLC_pos_mtb_931642	1421	whz	1	273	-0.0570271	-0.109019	-0.00830343	0.02547	0.437102	0.172034	0.715107	0.000901772	0.380075	0.111042	0.664031	0.00434595	0.999975	0.00734345	0.00434596
lavaan_mediation_preBEP_meta2_milk1421_muac1.csv	preBEP	milk	rLC_pos_mtb_9942350	1421	muac	1	273	0.373948	0.00449876	1.01016	0.147673	2.37262	0.231164	4.75914	0.0321672	2.74657	0.532279	4.96752	0.0119764	0.999938	0.0323843	0.0119764
lavaan_mediation_preBEP_meta2_milkpn12_muac2.csv	preBEP	milk	rLC_pos_mtb_9970005	pn12	muac	2	281	0.37143	0.0267164	0.907031	0.0911785	3.32228	0.809922	5.48344	0.00363874	3.69371	1.31237	5.79164	0.000960699	1	0.0036812	0.00173548
lavaan_mediation_preBEP_meta2_milkpn12_waz2.csv	preBEP	milk	rLC_pos_mtb_9970005	pn12	waz	2	281	0.0428961	0.00350485	0.113717	0.11284	0.311715	0.0301446	0.586974	0.0173961	0.354611	0.114383	0.617253	0.00545936	0.999999	0.0174115	0.00608593
lavaan_mediation_preBEP_meta2_milkpn12_weight2.csv	preBEP	milk	rLC_pos_mtb_9970005	pn12	weight	2	281	0.0229958	0.000508652	0.0751618	0.198738	0.231598	0.0513	0.405569	0.00819921	0.254594	0.0821459	0.427116	0.00298582	1	0.00822841	0.00333171
lavaan_mediation_preBEP_meta_plasmapn12_weight3.csv	preBEP	mother plasma	rLC_neg_mtb_1117333	pn12	weight	3	82	-0.0926576	-0.229489	-0.000470799	0.117874	0.682049	0.31594	1.00446	4.37809e-05	0.589392	0.191123	0.947422	0.000683325	0.999716	0.00149585	0.00126859
lavaan_mediation_preBEP_meta_plasmapn12_weight4.csv	preBEP	mother plasma	rLC_neg_mtb_1117333	pn12	weight	4	81	-0.0940865	-0.218631	-0.00690073	0.0856384	0.688939	0.30082	1.03091	0.000443342	0.594852	0.201682	0.986215	0.00356509	0.99933	0.00752991	0.00648463
lavaan_mediation_preBEP_meta_plasmapn12_muac4.csv	preBEP	mother plasma	rLC_neg_mtb_1186728	pn12	muac	4	81	-2.17283	-4.35443	-0.413591	0.0265261	7.82175	2.91247	13.198	0.00164753	5.64892	1.12075	10.9638	0.0232878	0.999927	0.0460488	0.0393877
lavaan_mediation_preBEP_meta_plasmapn12_waz2.csv	preBEP	mother plasma	rLC_neg_mtb_2188685	pn12	waz	2	81	-0.287599	-0.521319	-0.0478975	0.0140123	0.808998	0.196186	1.33217	0.0014933	0.521399	0.0378897	1.02688	0.0257109	0.999645	0.0750228	0.0611606
lavaan_mediation_preBEP_meta_plasmapn12_waz3.csv	preBEP	mother plasma	rLC_neg_mtb_2188685	pn12	waz	3	82	-0.234078	-0.43801	-0.0366211	0.0357958	0.834263	0.391243	1.25366	0.000417138	0.600185	0.0733235	0.967799	0.00666226	0.999424	0.0235367	0.0189231
lavaan_mediation_preBEP_meta_plasmapn12_weight2.csv	preBEP	mother plasma	rLC_neg_mtb_2188685	pn12	weight	2	81	-0.178161	-0.348212	-0.0162288	0.0304235	0.65986	0.294627	0.96791	4.63895e-05	0.481699	0.17844	0.788318	0.000834599	0.99997	0.00705858	0.00563113
lavaan_mediation_preBEP_meta_plasmapn12_weight3.csv	preBEP	mother plasma	rLC_neg_mtb_2188685	pn12	weight	3	82	-0.167395	-0.314744	-0.0173209	0.0382913	0.756787	0.369997	1.13522	3.33799e-05	0.589392	0.247109	0.859293	0.000293992	0.999716	0.00149585	0.00126859
lavaan_mediation_preBEP_meta_plasmapn12_muac4.csv	preBEP	mother plasma	rLC_neg_mtb_3194811	pn12	muac	4	81	-2.19346	-5.42513	-0.346957	0.0738147	7.84238	3.73936	12.7861	0.000638834	5.64892	1.24689	10.7132	0.016307	0.999927	0.0460488	0.0393877
lavaan_mediation_preBEP_meta_plasmapn12_waz4.csv	preBEP	mother plasma	rLC_neg_mtb_3194811	pn12	waz	4	81	-0.178653	-0.498326	-0.00644626	0.147554	0.730364	0.286863	1.23965	0.00154476	0.551712	0.0563263	1.05845	0.0301972	0.999864	0.0600634	0.050304
lavaan_mediation_preBEP_meta_plasmapn12_weight4.csv	preBEP	mother plasma	rLC_neg_mtb_3194811	pn12	weight	4	81	-0.137494	-0.369945	-0.00848393	0.12474	0.732346	0.357498	1.14992	8.94306e-05	0.594852	0.160762	0.975344	0.00333892	0.99933	0.00752991	0.00648463
lavaan_mediation_preBEP_meta_plasmapn12_muac4.csv	preBEP	mother plasma	rLC_neg_mtb_3569790	pn12	muac	4	81	-1.55956	-3.78493	-0.0761864	0.0747295	7.20848	1.625	13.1235	0.00930406	5.64892	0.33642	11.1834	0.0357082	0.999927	0.0460488	0.0393877
lavaan_mediation_preBEP_meta_plasmapn12_hc2.csv	preBEP	mother plasma	rLC_neg_mtb_3606887	pn12	hc	2	81	1.53757	0.0302608	4.68871	0.176096	5.81313	0.0462176	12.7333	0.0747032	7.3507	1.67901	14.7833	0.0266132	0.999442	0.0752511	0.0297953
lavaan_mediation_preBEP_meta_plasmapn12_hc3.csv	preBEP	mother plasma	rLC_neg_mtb_3606887	pn12	hc	3	82	1.76353	0.0598906	5.04906	0.155842	7.52417	1.74423	12.961	0.0120228	9.2877	2.75042	15.399	0.00242215	0.999753	0.0122005	0.00371937
lavaan_mediation_preBEP_meta_plasmapn12_weight3.csv	preBEP	mother plasma	rLC_neg_mtb_4091474	pn12	weight	3	82	0.100206	0.013085	0.205783	0.060052	0.489186	0.0604124	0.952595	0.0147625	0.589392	0.152518	0.992531	0.00156685	0.999716	0.0147625	0.00167674
lavaan_mediation_preBEP_meta_plasmapn12_weight3.csv	preBEP	mother plasma	rLC_neg_mtb_4349625	pn12	weight	3	82	0.0821935	0.000430306	0.208575	0.13577	0.507198	0.163317	0.899919	0.00700263	0.589392	0.25557	0.964608	0.000968669	0.999716	0.00703679	0.00132918
lavaan_mediation_preBEP_meta_plasmapn12_muac4.csv	preBEP	mother plasma	rLC_neg_mtb_4477201	pn12	muac	4	81	-1.46252	-3.69407	-0.0330224	0.139652	7.11144	2.44868	12.441	0.00458527	5.64892	0.744852	11.225	0.0269214	0.999927	0.0460488	0.0393877
lavaan_mediation_preBEP_meta_plasmapn12_waz3.csv	preBEP	mother plasma	rLC_neg_mtb_4496106	pn12	waz	3	82	-0.194637	-0.454481	-0.0148366	0.0889189	0.794823	0.303189	1.28866	0.00128604	0.600185	0.117402	1.03069	0.00841473	0.999424	0.0235367	0.0189231
lavaan_mediation_preBEP_meta_plasmapn12_weight3.csv	preBEP	mother plasma	rLC_neg_mtb_4496106	pn12	weight	3	82	-0.126634	-0.305121	-0.00871657	0.0924918	0.716025	0.368229	1.04548	6.41838e-05	0.589392	0.288373	0.928255	0.000330793	0.999716	0.00149585	0.00126859
lavaan_mediation_preBEP_meta_plasmapn12_muac4.csv	preBEP	mother plasma	rLC_pos_mtb_1693385	pn12	muac	4	81	-1.50059	-3.3878	-0.069927	0.0550627	7.14952	1.73763	12.7217	0.00539611	5.64892	1.02782	11.5165	0.0215646	0.999927	0.0460488	0.0393877
lavaan_mediation_preBEP_meta_plasmapn12_muac4.csv	preBEP	mother plasma	rLC_pos_mtb_3523177	pn12	muac	4	81	-1.15335	-2.79464	-0.0072537	0.104959	6.80227	1.32463	11.6837	0.00831977	5.64892	0.612399	10.0218	0.0202008	0.999927	0.0460488	0.0393877
lavaan_mediation_preBEP_meta_plasmapn12_hc3.csv	preBEP	mother plasma	rLC_pos_mtb_5060798	pn12	hc	3	82	1.73327	0.0929207	3.85354	0.0815875	7.55442	0.725495	14.1846	0.0202551	9.2877	2.94836	15.0553	0.00272866	0.999753	0.0202551	0.00372962
lavaan_mediation_preBEP_meta_plasmapn12_weight4.csv	preBEP	mother plasma	rLC_pos_mtb_5060798	pn12	weight	4	81	0.129409	0.000120714	0.367071	0.127007	0.465443	0.0574416	0.917263	0.0265677	0.594852	0.172531	0.992879	0.00366633	0.99933	0.0265677	0.00648463
lavaan_mediation_preBEP_meta_plasmapn12_hc3.csv	preBEP	mother plasma	rLC_pos_mtb_9601066	pn12	hc	3	82	-1.83559	-4.25284	-0.0215025	0.109026	11.1233	5.39276	16.304	4.38416e-05	9.2877	2.93899	15.2298	0.00117835	0.999753	0.00426858	0.00371937
lavaan_mediation_preBEP_meta_plasmapn12_height4.csv	preBEP	mother plasma	rLC_pos_mtb_9601066	pn12	height	4	81	-0.36746	-0.98389	-0.00933682	0.139738	1.634	0.359678	2.96748	0.00828907	1.26654	-0.0573987	2.67055	0.0517157	0.99996	0.0916001	0.0763472
lavaan_mediation_preBEP_meta_plasmapn12_weight4.csv	preBEP	mother plasma	rLC_pos_mtb_9601066	pn12	weight	4	81	-0.0992291	-0.257133	-3.34295e-05	0.138263	0.694082	0.245911	1.07836	0.000511396	0.594852	0.146734	0.993972	0.00346809	0.99933	0.00752991	0.00648463
lavaan_mediation_preBEP_meta_vamspn56_muac6.csv	preBEP	mother vams	vam_1000309	pn56	muac	6	230	-0.471668	-1.20457	-0.00492923	0.111928	3.13729	0.304087	6.6415	0.0353869	2.66562	-0.488567	5.91149	0.0725805	0.999811	0.111445	0.107233
lavaan_mediation_preBEP_meta_vamspn56_whz7.csv	preBEP	mother vams	vam_1000749	pn56	whz	7	210	-0.0606164	-0.145344	-0.00597711	0.115915	0.361311	0.0454588	0.648861	0.0249651	0.300695	-5.20861e-05	0.583254	0.0504672	0.99933	0.0953998	0.0893508
lavaan_mediation_preBEP_meta_vamspn56_height7.csv	preBEP	mother vams	vam_1000894	pn56	height	7	211	-0.168281	-0.415373	-0.0215662	0.0895429	1.0894	0.400745	1.81016	0.00258397	0.921123	0.260924	1.69078	0.0103664	0.999999	0.0243643	0.0233168
lavaan_mediation_preBEP_meta_vamspn56_weight6.csv	preBEP	mother vams	vam_1002045	pn56	weight	6	230	-0.0437528	-0.0901902	-0.00233082	0.0581849	0.287659	0.0193843	0.562206	0.0278697	0.243906	-0.0325163	0.552503	0.0639058	0.999996	0.0685646	0.0666813
lavaan_mediation_preBEP_meta_vamspn56_hc7.csv	preBEP	mother vams	vam_1003974	pn56	hc	7	211	-0.0698704	-0.144378	-0.00228672	0.0701732	0.618613	0.17777	1.03542	0.00333621	0.548742	0.162075	0.989459	0.00779664	0.999853	0.00968103	0.009598
lavaan_mediation_preBEP_meta_vamspn56_waz7.csv	preBEP	mother vams	vam_1003974	pn56	waz	7	210	-0.0254015	-0.0637464	-0.000825436	0.0998411	0.435989	0.111312	0.811059	0.00783883	0.410587	0.110119	0.782033	0.0100648	0.999954	0.0164369	0.0150825
lavaan_mediation_preBEP_meta_vamspn56_weight7.csv	preBEP	mother vams	vam_1003974	pn56	weight	7	211	-0.0284087	-0.0683904	-0.000199976	0.132854	0.452103	0.145899	0.74977	0.00229603	0.423694	0.112658	0.719577	0.00394874	0.999899	0.00348779	0.00417463
lavaan_mediation_preBEP_meta_vamspn56_hc6.csv	preBEP	mother vams	vam_1004005	pn56	hc	6	230	-0.5928	-1.42472	-0.00275842	0.125468	3.9451	0.631217	7.9084	0.0529448	3.3523	-0.270464	7.22271	0.0885458	0.999969	0.112843	0.104399
lavaan_mediation_preBEP_meta_vamspn56_hc7.csv	preBEP	mother vams	vam_1004005	pn56	hc	7	211	-0.00647624	-0.169116	-0.000624873	0.889974	0.555219	0.21522	0.943255	0.00366385	0.548742	0.188306	0.912117	0.00361247	0.999853	0.00968103	0.009598
lavaan_mediation_preBEP_meta_vamspn56_haz7.csv	preBEP	mother vams	vam_1006121	pn56	haz	7	210	-0.04403	-0.11235	-0.00836428	0.103516	0.359313	0.00613886	0.686625	0.039084	0.315283	-0.0283011	0.640909	0.0669167	0.999754	0.0948446	0.085627
lavaan_mediation_preBEP_meta_vamspn56_height7.csv	preBEP	mother vams	vam_1006121	pn56	height	7	211	-0.0948898	-0.224684	-0.00154833	0.0957088	1.01601	0.156277	1.74422	0.00869309	0.921123	0.0884112	1.63396	0.017318	0.999999	0.0243643	0.0233168
lavaan_mediation_preBEP_meta_vamspn56_weight6.csv	preBEP	mother vams	vam_1006121	pn56	weight	6	230	-0.0490702	-0.123345	-0.00967406	0.0753591	0.292977	0.00657748	0.566424	0.0294371	0.243906	-0.0679403	0.526539	0.0696855	0.999996	0.0685646	0.0709404
lavaan_mediation_preBEP_meta_vamspn56_height6.csv	preBEP	mother vams	vam_1006711	pn56	height	6	230	-0.106642	-0.229722	-0.0133731	0.0545615	0.655347	0.0364717	1.38201	0.0568148	0.548704	-0.0715283	1.25223	0.102751	0.999984	0.138865	0.131209
lavaan_mediation_preBEP_meta_vamspn56_weight6.csv	preBEP	mother vams	vam_1006711	pn56	weight	6	230	-0.0455522	-0.119957	-0.00199661	0.136197	0.289459	0.0143908	0.533654	0.0229845	0.243906	-0.0176181	0.514136	0.0529497	0.999996	0.0685646	0.0650793
lavaan_mediation_preBEP_meta_vamspn56_hc6.csv	preBEP	mother vams	vam_1007848	pn56	hc	6	230	-0.536069	-1.1917	-0.0395364	0.0563222	3.88837	0.189382	7.54306	0.0340861	3.3523	-0.0791006	6.86015	0.0557108	0.999969	0.112843	0.104399
lavaan_mediation_preBEP_meta_vamspn56_hc7.csv	preBEP	mother vams	vam_1007848	pn56	hc	7	211	-0.0474613	-0.113885	-0.00584832	0.077233	0.596204	0.17613	0.952682	0.00386659	0.548742	0.147738	0.907219	0.0067678	0.999853	0.00968103	0.009598
lavaan_mediation_preBEP_meta_vamspn56_hc7.csv	preBEP	mother vams	vam_1009089	pn56	hc	7	211	-0.00527635	-0.116898	-0.000495892	0.857346	0.554019	0.120127	0.950916	0.00821973	0.548742	0.0624716	0.899849	0.00892903	0.999853	0.0099863	0.0100506
lavaan_mediation_preBEP_meta_vamspn56_haz7.csv	preBEP	mother vams	vam_1011553	pn56	haz	7	210	-0.0655556	-0.141626	-0.00776458	0.0669554	0.380838	0.0278877	0.741188	0.0234194	0.315283	-0.0233314	0.635729	0.0495146	0.999754	0.0948446	0.085627
lavaan_mediation_preBEP_meta_vamspn56_height7.csv	preBEP	mother vams	vam_1011553	pn56	height	7	211	-0.13028	-0.33075	-0.00246042	0.124994	1.0514	0.266261	1.73551	0.00673363	0.921123	0.138891	1.65775	0.0174299	0.999999	0.0243643	0.0233168
lavaan_mediation_preBEP_meta_vamspn56_haz7.csv	preBEP	mother vams	vam_1012015	pn56	haz	7	210	-0.100911	-0.22135	-0.00913094	0.0631386	0.416193	0.0782689	0.782274	0.01442	0.315283	-0.07024	0.689956	0.0554565	0.999754	0.0948446	0.085627
lavaan_mediation_preBEP_meta_vamspn56_hc6.csv	preBEP	mother vams	vam_1012015	pn56	hc	6	230	-1.25146	-2.51987	-0.36398	0.0254895	4.60377	0.618653	8.20677	0.017319	3.3523	-0.323691	6.98453	0.081455	0.999969	0.112843	0.104399
lavaan_mediation_preBEP_meta_vamspn56_hc7.csv	preBEP	mother vams	vam_1012015	pn56	hc	7	211	-0.0808781	-0.180513	-0.00127414	0.0634463	0.629621	0.212307	0.986511	0.00161653	0.548742	0.0795427	0.918313	0.00811634	0.999853	0.00968103	0.0096472
lavaan_mediation_preBEP_meta_vamspn56_height6.csv	preBEP	mother vams	vam_1012015	pn56	height	6	230	-0.188523	-0.411681	-0.0204459	0.061356	0.737227	0.118519	1.4064	0.0301356	0.548704	-0.0273164	1.20724	0.103156	0.999984	0.138865	0.131209
lavaan_mediation_preBEP_meta_vamspn56_height7.csv	preBEP	mother vams	vam_1012015	pn56	height	7	211	-0.205083	-0.44239	-0.0141388	0.0633627	1.12621	0.428228	2.09834	0.00427315	0.921123	0.204508	1.76376	0.0205925	0.999999	0.0243643	0.0233922
lavaan_mediation_preBEP_meta_vamspn56_weight6.csv	preBEP	mother vams	vam_1012015	pn56	weight	6	230	-0.0575485	-0.137258	-0.00357307	0.0982474	0.301455	0.0735303	0.525615	0.00833835	0.243906	0.0111815	0.489121	0.03459	0.999996	0.0685646	0.0650793
lavaan_mediation_preBEP_meta_vamspn56_hc7.csv	preBEP	mother vams	vam_1012073	pn56	hc	7	211	-0.0461278	-0.100243	-0.000814544	0.0460187	0.59487	0.231835	1.03449	0.00387905	0.548742	0.167284	0.974769	0.00732908	0.999853	0.00968103	0.009598
lavaan_mediation_preBEP_meta_vamspn56_height7.csv	preBEP	mother vams	vam_1012073	pn56	height	7	211	-0.109369	-0.220418	-0.00161057	0.0516049	1.03049	0.228561	1.8444	0.00667322	0.921123	0.0884299	1.78144	0.0157986	0.999999	0.0243643	0.0233168
lavaan_mediation_preBEP_meta_vamspn56_hc7.csv	preBEP	mother vams	vam_1012102	pn56	hc	7	211	-0.0747705	-0.195208	-0.00218681	0.133181	0.623513	0.223327	1.0355	0.00186802	0.548742	0.144028	0.984653	0.0069829	0.999853	0.00968103	0.009598
lavaan_mediation_preBEP_meta_vamspn56_hc7.csv	preBEP	mother vams	vam_1012684	pn56	hc	7	211	-0.0744643	-0.182488	-0.00342966	0.102627	0.623207	0.231537	1.00294	0.00160922	0.548742	0.179271	0.907395	0.00513992	0.999853	0.00968103	0.009598
lavaan_mediation_preBEP_meta_vamspn56_height7.csv	preBEP	mother vams	vam_1012684	pn56	height	7	211	-0.145033	-0.37281	-0.00911776	0.106741	1.06616	0.443003	1.73731	0.00153231	0.921123	0.252137	1.54154	0.00754661	0.999999	0.0243643	0.0233168
lavaan_mediation_preBEP_meta_vamspn56_weight7.csv	preBEP	mother vams	vam_1012684	pn56	weight	7	211	-0.0477411	-0.130391	-0.00163793	0.133732	0.471435	0.202532	0.755124	0.00100976	0.423694	0.148843	0.745073	0.00320882	0.999899	0.00348779	0.00373779
lavaan_mediation_preBEP_meta_vamspn56_stunting6.csv	preBEP	mother vams	vam_1015826	pn56	stunting	6	230	0.19416	0.0120521	0.376268	0.0366469	-0.495568	-0.984381	-0.00675579	0.0469166	-0.301408	-0.790577	0.18776	0.227178	1	0.293543	0.227429
lavaan_mediation_preBEP_meta_vamspn56_weight6.csv	preBEP	mother vams	vam_1015826	pn56	weight	6	230	-0.0719163	-0.160395	-0.0209253	0.0602427	0.315823	0.0426653	0.550572	0.00707523	0.243906	-0.0208874	0.484208	0.0429825	0.999996	0.0685646	0.0650793
lavaan_mediation_preBEP_meta_vamspn56_height7.csv	preBEP	mother vams	vam_1021203	pn56	height	7	211	-0.145797	-0.287947	-0.00367142	0.0446612	1.06692	0.396254	1.81887	0.00353871	0.921123	0.186652	1.61526	0.013489	0.999999	0.0243643	0.0233168
lavaan_mediation_preBEP_meta_vamspn56_weight7.csv	preBEP	mother vams	vam_1024165	pn56	weight	7	211	-0.0511467	-0.125775	-0.00201366	0.124412	0.474841	0.230286	0.750847	0.000235017	0.423694	0.168297	0.706872	0.000833875	0.999899	0.00348779	0.0035114
lavaan_mediation_preBEP_meta_vamspn56_waz7.csv	preBEP	mother vams	vam_1027019	pn56	waz	7	210	-0.0622381	-0.157915	-0.00686324	0.0996073	0.472825	0.206919	0.792266	0.00125012	0.410587	0.164801	0.720326	0.00330825	0.999954	0.0164369	0.0150825
lavaan_mediation_preBEP_meta_vamspn56_weight7.csv	preBEP	mother vams	vam_1027019	pn56	weight	7	211	-0.0472946	-0.127931	-0.00370825	0.107923	0.470989	0.220965	0.802125	0.000987191	0.423694	0.189729	0.776488	0.00269955	0.999899	0.00348779	0.00354431
lavaan_mediation_preBEP_meta_vamspn56_whz7.csv	preBEP	mother vams	vam_1027019	pn56	whz	7	210	-0.0553934	-0.139574	-0.005787	0.0950426	0.356088	0.0342053	0.648179	0.0155781	0.300695	-0.0109504	0.568069	0.0349614	0.99933	0.0953998	0.0893508
lavaan_mediation_preBEP_meta_vamspn56_weight6.csv	preBEP	mother vams	vam_1027659	pn56	weight	6	230	-0.0669546	-0.159648	-0.00348537	0.123841	0.310861	0.0430435	0.573638	0.00916219	0.243906	0.00582962	0.492193	0.028777	0.999996	0.0685646	0.0650793
lavaan_mediation_preBEP_meta_vamspn56_muac6.csv	preBEP	mother vams	vam_1029523	pn56	muac	6	230	-0.548631	-1.40203	-0.0412929	0.127474	3.21425	0.283937	6.13898	0.0375832	2.66562	-0.366206	5.61532	0.0823639	0.999811	0.111445	0.107233
lavaan_mediation_preBEP_meta_vamspn56_weight6.csv	preBEP	mother vams	vam_1029523	pn56	weight	6	230	-0.039812	-0.118427	-0.000428107	0.167054	0.283718	0.0369922	0.541915	0.0216805	0.243906	-0.0185384	0.488054	0.0489761	0.999996	0.0685646	0.0650793
lavaan_mediation_preBEP_meta_vamspn56_muac6.csv	preBEP	mother vams	vam_1042764	pn56	muac	6	230	-0.475816	-1.25672	-0.015925	0.161752	3.14144	0.0598469	6.44385	0.0533455	2.66562	-0.431264	5.90009	0.0992191	0.999811	0.111445	0.107962
lavaan_mediation_preBEP_meta_vamspn56_muac6.csv	preBEP	mother vams	vam_2001391	pn56	muac	6	230	-0.674178	-1.42917	-0.0308195	0.0611737	3.3398	0.426869	6.25323	0.0223123	2.66562	0.0666221	5.7407	0.0638442	0.999811	0.111445	0.107233
lavaan_mediation_preBEP_meta_vamspn56_weight6.csv	preBEP	mother vams	vam_2001391	pn56	weight	6	230	-0.0498422	-0.114562	-0.00677809	0.0635938	0.293749	0.067279	0.541043	0.0184503	0.243906	0.0125783	0.51343	0.0477552	0.999996	0.0685646	0.0650793
lavaan_mediation_preBEP_meta_vamspn56_haz7.csv	preBEP	mother vams	vam_2002382	pn56	haz	7	210	-0.0655246	-0.15505	-0.00283024	0.0938077	0.380807	0.0480766	0.718232	0.0193047	0.315283	0.00156357	0.664564	0.050155	0.999754	0.0948446	0.085627
lavaan_mediation_preBEP_meta_vamspn56_waz7.csv	preBEP	mother vams	vam_2002382	pn56	waz	7	210	-0.0997352	-0.189698	-0.0221738	0.0332837	0.510322	0.153746	0.787388	0.000716253	0.410587	0.06631	0.685401	0.00588525	0.999954	0.0164369	0.0150825
lavaan_mediation_preBEP_meta_vamspn56_weight7.csv	preBEP	mother vams	vam_2002382	pn56	weight	7	211	-0.0803382	-0.189424	-0.00947997	0.0657565	0.504032	0.197241	0.781359	0.000276125	0.423694	0.143303	0.69007	0.00215626	0.999899	0.00348779	0.0035114
lavaan_mediation_preBEP_meta_vamspn56_whz7.csv	preBEP	mother vams	vam_2002382	pn56	whz	7	210	-0.0841278	-0.179408	-0.0173679	0.0403059	0.384823	0.0845872	0.687783	0.0130152	0.300695	-0.0129852	0.595308	0.0509722	0.99933	0.0953998	0.0893508
lavaan_mediation_preBEP_meta_vamspn56_waz7.csv	preBEP	mother vams	vam_2003220	pn56	waz	7	210	-0.0543357	-0.117696	-0.00736466	0.0871599	0.464923	0.181576	0.81181	0.00256111	0.410587	0.134863	0.771794	0.00888972	0.999954	0.0164369	0.0150825
lavaan_mediation_preBEP_meta_vamspn56_whz7.csv	preBEP	mother vams	vam_2003220	pn56	whz	7	210	-0.0438479	-0.103149	-0.00561179	0.0742238	0.344543	0.0587131	0.695194	0.0306249	0.300695	0.0180619	0.647302	0.0584605	0.99933	0.0953998	0.0893508
lavaan_mediation_preBEP_meta_vamspn56_muac6.csv	preBEP	mother vams	vam_2003571	pn56	muac	6	230	-0.431856	-0.79538	-0.124597	0.00926	3.09748	0.013877	5.94593	0.0347355	2.66562	-0.352505	5.47986	0.0668366	0.999811	0.111445	0.107233
lavaan_mediation_preBEP_meta_vamspn56_hc7.csv	preBEP	mother vams	vam_2004369	pn56	hc	7	211	0.0704816	0.00657998	0.162935	0.0874117	0.478261	0.104397	0.812895	0.00579973	0.548742	0.194855	0.864558	0.00196764	0.999853	0.00968103	0.009598
lavaan_mediation_preBEP_meta_vamspn56_weight7.csv	preBEP	mother vams	vam_2005347	pn56	weight	7	211	-0.0376994	-0.1056	-0.00244427	0.147049	0.461394	0.154766	0.746814	0.0011922	0.423694	0.132315	0.703195	0.00341538	0.999899	0.00348779	0.00382539
lavaan_mediation_preBEP_meta_vamspn56_haz7.csv	preBEP	mother vams	vam_2006570	pn56	haz	7	210	-0.0756971	-0.147818	-0.0178677	0.0151096	0.39098	0.0717673	0.742789	0.0195487	0.315283	-0.0158832	0.655692	0.0586602	0.999754	0.0948446	0.085627
lavaan_mediation_preBEP_meta_vamspn56_height6.csv	preBEP	mother vams	vam_2006570	pn56	height	6	230	-0.168976	-0.362467	-0.0215363	0.0376712	0.71768	0.173371	1.44535	0.0430382	0.548704	0.0268435	1.31707	0.113747	0.999984	0.138865	0.131209
lavaan_mediation_preBEP_meta_vamspn56_height7.csv	preBEP	mother vams	vam_2006570	pn56	height	7	211	-0.158338	-0.326043	-0.0226672	0.0309856	1.07946	0.213572	1.87964	0.00851708	0.921123	0.016494	1.74899	0.0243434	0.999999	0.0243643	0.0255952
lavaan_mediation_preBEP_meta_vamspn56_waz6.csv	preBEP	mother vams	vam_2006570	pn56	waz	6	230	-0.0731814	-0.165614	-0.0117449	0.0570506	0.26846	0.0164523	0.604391	0.0462611	0.195279	-0.0816832	0.478995	0.166641	0.999922	0.221942	0.201384
lavaan_mediation_preBEP_meta_vamspn56_weight6.csv	preBEP	mother vams	vam_2006570	pn56	weight	6	230	-0.062191	-0.137747	-0.0055066	0.0760451	0.306097	0.0823301	0.580275	0.0103024	0.243906	-0.00473156	0.528799	0.0503724	0.999996	0.0685646	0.0650793
lavaan_mediation_preBEP_meta_vamspn56_weight7.csv	preBEP	mother vams	vam_2006570	pn56	weight	7	211	-0.0575553	-0.148616	-0.0029322	0.137082	0.48125	0.174516	0.75629	0.000931852	0.423694	0.113974	0.699489	0.00394275	0.999899	0.00348779	0.00417433
lavaan_mediation_preBEP_meta_vamspn56_muac6.csv	preBEP	mother vams	vam_2007285	pn56	muac	6	230	-0.625611	-1.40438	-0.127445	0.060555	3.29123	0.195888	6.6933	0.0386012	2.66562	-0.74751	6.14084	0.104225	0.999811	0.111445	0.109539
lavaan_mediation_preBEP_meta_vamspn56_weight6.csv	preBEP	mother vams	vam_2007285	pn56	weight	6	230	-0.049672	-0.125919	-0.00810535	0.122095	0.293578	0.0460675	0.615953	0.02796	0.243906	-0.0104163	0.58797	0.0733677	0.999996	0.0685646	0.0739836
lavaan_mediation_preBEP_meta_vamspn56_waz7.csv	preBEP	mother vams	vam_2008011	pn56	waz	7	210	-0.091445	-0.197825	-0.0145204	0.0490177	0.502032	0.157297	0.779925	0.00100107	0.410587	0.118345	0.697425	0.00612145	0.999954	0.0164369	0.0150825
lavaan_mediation_preBEP_meta_vamspn56_weight6.csv	preBEP	mother vams	vam_2008011	pn56	weight	6	230	-0.0452575	-0.118214	-0.0014005	0.125686	0.289164	0.0613448	0.477386	0.00639862	0.243906	0.00442577	0.452361	0.0277651	0.999996	0.0685646	0.0650793
lavaan_mediation_preBEP_meta_vamspn56_haz7.csv	preBEP	mother vams	vam_2009731	pn56	haz	7	210	-0.0445304	-0.10468	-0.00049471	0.0782949	0.359813	0.0582325	0.667219	0.0251537	0.315283	0.0115665	0.607327	0.0506962	0.999754	0.0948446	0.085627
lavaan_mediation_preBEP_meta_vamspn56_height6.csv	preBEP	mother vams	vam_2009731	pn56	height	6	230	-0.177014	-0.377296	-0.0607969	0.0172	0.725719	0.0788399	1.38094	0.0213787	0.548704	-0.157028	1.14911	0.0857871	0.999984	0.138865	0.131209
lavaan_mediation_preBEP_meta_vamspn56_height7.csv	preBEP	mother vams	vam_2009731	pn56	height	7	211	-0.109251	-0.227358	-0.00394081	0.0731166	1.03037	0.298584	1.81564	0.00493762	0.921123	0.17217	1.76737	0.0131676	0.999999	0.0243643	0.0233168
lavaan_mediation_preBEP_meta_vamspn56_muac6.csv	preBEP	mother vams	vam_2009731	pn56	muac	6	230	-0.482715	-1.23726	-0.0409265	0.12766	3.14834	0.106977	6.28388	0.0413714	2.66562	-0.373441	5.60332	0.0892967	0.999811	0.111445	0.107233
lavaan_mediation_preBEP_meta_vamspn56_weight6.csv	preBEP	mother vams	vam_2009731	pn56	weight	6	230	-0.0673319	-0.170088	-0.0190263	0.072994	0.311238	0.0488248	0.543066	0.00910329	0.243906	-0.0343497	0.470727	0.0507941	0.999996	0.0685646	0.0650793
lavaan_mediation_preBEP_meta_vamspn56_haz7.csv	preBEP	mother vams	vam_2011129	pn56	haz	7	210	-0.0638755	-0.130542	-0.0046397	0.0424033	0.379158	0.0789071	0.703548	0.0220788	0.315283	0.00148049	0.61912	0.0562813	0.999754	0.0948446	0.085627
lavaan_mediation_preBEP_meta_vamspn56_waz7.csv	preBEP	mother vams	vam_2011129	pn56	waz	7	210	-0.0963671	-0.205037	-0.00416057	0.0507162	0.506954	0.210366	0.806086	0.000771349	0.410587	0.119485	0.714174	0.010364	0.999954	0.0164369	0.0150825
lavaan_mediation_preBEP_meta_vamspn56_weight7.csv	preBEP	mother vams	vam_2011129	pn56	weight	7	211	-0.0829345	-0.187414	-0.0196079	0.0537287	0.506629	0.222319	0.76642	0.000206169	0.423694	0.141217	0.682814	0.00209394	0.999899	0.00348779	0.0035114
lavaan_mediation_preBEP_meta_vamspn56_height6.csv	preBEP	mother vams	vam_2011421	pn56	height	6	230	-0.160413	-0.397677	-0.0233512	0.0816389	0.709117	0.0816564	1.34953	0.0260289	0.548704	-0.0200897	1.13441	0.069005	0.999984	0.138865	0.131209
lavaan_mediation_preBEP_meta_vamspn56_weight6.csv	preBEP	mother vams	vam_2011729	pn56	weight	6	230	-0.0124932	-0.0675069	-0.00255895	0.477872	0.2564	0.0657804	0.528058	0.031754	0.243906	0.0398153	0.496001	0.0405056	0.999996	0.0685646	0.0650793
lavaan_mediation_preBEP_meta_vamspn56_muac6.csv	preBEP	mother vams	vam_2016093	pn56	muac	6	230	-0.545605	-1.372	-0.00582702	0.0893564	3.21123	0.63215	6.07783	0.0248009	2.66562	0.116868	5.29125	0.0633354	0.999811	0.111445	0.107233
lavaan_mediation_preBEP_meta_vamspn56_weight6.csv	preBEP	mother vams	vam_2018595	pn56	weight	6	230	-0.0419182	-0.11024	-0.0018816	0.133343	0.285825	0.0378005	0.512018	0.0286809	0.243906	0.00766948	0.472768	0.0590392	0.999996	0.0685646	0.0650793
lavaan_mediation_preBEP_meta_vamspn56_haz7.csv	preBEP	mother vams	vam_2039956	pn56	haz	7	210	-0.0593649	-0.17079	-0.00102863	0.124446	0.374647	0.0404857	0.72856	0.0232328	0.315283	-0.0309074	0.697178	0.0532588	0.999754	0.0948446	0.085627
lavaan_mediation_preBEP_meta_vamspn56_height7.csv	preBEP	mother vams	vam_2040533	pn56	height	7	211	-0.125181	-0.313016	-0.00106031	0.125917	1.0463	0.325707	1.67631	0.0027652	0.921123	0.182578	1.6832	0.0102471	0.999999	0.0243643	0.0233168

## Sheet: proteome
source_file	exposure	layer	mediator	timepoint	outcome	month	n	ind_est	ind_l	ind_u	ind_p	dir_est	dir_l	dir_u	dir_p	tot_est	tot_l	tot_u	tot_p	ind_fdr	dir_fdr	tot_fdr		mediator	protein name	gene names	length
lavaan_mediation_preBEP_prot_naivepn56_whz7.csv	preBEP	naive	A0A075B6S5	pn56	whz	7	110	-0.136969	-0.303425	-0.00275966	0.0752252	0.533002	0.0264241	0.960283	0.0267357	0.396033	-0.0615982	0.843944	0.0892929	0.999848	0.107998	0.105631		A0A075B6S5	Immunoglobulin kappa variable 1-27	IGKV1-27	117 AA
lavaan_mediation_preBEP_prot_naivepn12_waz4.csv	preBEP	naive	A0A0A0MS14	pn12	waz	4	140	-0.0524998	-0.169935	-0.00400439	0.166249	0.355063	0.032767	0.777923	0.0515662	0.302563	0.0121913	0.714584	0.0831309	0.999797	0.148732	0.138192		A0A0A0MS14	Immunoglobulin heavy variable 1-45	IGHV1-45	117 AA
lavaan_mediation_preBEP_prot_naivepn12_waz2.csv	preBEP	naive	A0A0A0MS15	pn12	waz	2	142	-0.0757682	-0.187367	-0.00673504	0.112273	0.433638	0.0622826	0.852814	0.0231291	0.35787	4.86437e-06	0.767855	0.0545847	0.998888	0.0728268	0.0694321		A0A0A0MS15	Immunoglobulin heavy variable 3-49	IGHV3-49	119 AA
lavaan_mediation_preBEP_prot_naivepn12_weight2.csv	preBEP	naive	A0A0A0MS15	pn12	weight	2	142	-0.0433007	-0.118842	-0.00136308	0.145875	0.286758	0.0297692	0.536233	0.0230857	0.243458	-0.024926	0.501397	0.0481486	0.999991	0.0653697	0.0609283		A0A0A0MS15	Immunoglobulin heavy variable 3-49	IGHV3-49	119 AA
lavaan_mediation_preBEP_prot_naivepn12_whz4.csv	preBEP	naive	A0A0A0MT89	pn12	whz	4	140	-0.0680441	-0.149583	-0.00545378	0.0918233	0.376627	0.00230161	0.819824	0.0540895	0.308583	-0.0421442	0.699485	0.0977817	0.999902	0.153201	0.13386		A0A0A0MT89	Immunoglobulin kappa joining 1	IGKJ1	12 AA
lavaan_mediation_preBEP_prot_naivepn12_waz4.csv	preBEP	naive	A0A0B4J1V2	pn12	waz	4	140	-0.0979424	-0.196747	-0.012222	0.0413684	0.400506	0.0387684	0.702982	0.0123187	0.302563	-0.0350995	0.636392	0.0738152	0.999797	0.148732	0.138192		A0A0B4J1V2	Immunoglobulin heavy variable 2-26	IGHV2-26	119 AA
lavaan_mediation_preBEP_prot_naivepn12_weight4.csv	preBEP	naive	A0A0B4J1V2	pn12	weight	4	140	-0.0769665	-0.170868	-0.00735659	0.0535644	0.327101	0.0621863	0.552202	0.013147	0.250135	-0.000433498	0.519784	0.060398	0.999875	0.140595	0.129902		A0A0B4J1V2	Immunoglobulin heavy variable 2-26	IGHV2-26	119 AA
lavaan_mediation_preBEP_prot_depletedpn56_hc6.csv	preBEP	depleted	O94979	pn56	hc	6	123	-0.938114	-2.20762	-0.0103282	0.0901047	5.06258	0.571838	10.3617	0.0648217	4.12447	-0.570607	10.1921	0.137956	0.999898	0.173835	0.15407		O94979	Protein transport protein Sec31A	SEC31A, KIAA0905, SEC31L1, HSPC275, HSPC334	1,220 AA
lavaan_mediation_preBEP_prot_depletedpn12_waz3.csv	preBEP	depleted	O94979	pn12	waz	3	143	-0.0653702	-0.179381	-0.000589889	0.168409	0.393742	0.0649498	0.686649	0.0228156	0.328372	-0.0463314	0.662401	0.0671505	0.999243	0.0909044	0.0909879		O94979	Protein transport protein Sec31A	SEC31A, KIAA0905, SEC31L1, HSPC275, HSPC334	1,220 AA
lavaan_mediation_preBEP_prot_naivepn56_waz7.csv	preBEP	naive	P00738	pn56	waz	7	110	-0.129628	-0.280705	-0.0246286	0.0614231	0.664795	0.215026	1.09606	0.00509539	0.535167	0.0748249	1.00007	0.0224778	0.999662	0.0276927	0.0260904		P00738	Haptoglobin	HP	406 AA
lavaan_mediation_preBEP_prot_depletedpn56_hc6.csv	preBEP	depleted	P01040	pn56	hc	6	123	-1.09222	-2.9825	-0.109951	0.145722	5.21669	0.178868	12.0624	0.0840843	4.12447	-1.12038	10.9223	0.157652	0.999898	0.173835	0.16058		P01040	Cystatin-A	CSTA, STF1, STFA	98 AA
lavaan_mediation_preBEP_prot_depletedpn56_whz7.csv	preBEP	depleted	P02743	pn56	whz	7	110	-0.106099	-0.289951	-0.00559983	0.135535	0.502132	0.115773	0.987066	0.0192745	0.396033	-0.0497621	0.861554	0.0864936	0.999153	0.111222	0.106667		P02743	Serum amyloid P-component	APCS, PTX2	223 AA
lavaan_mediation_preBEP_prot_depletedpn12_muac4.csv	preBEP	depleted	P04075	pn12	muac	4	140	-0.876371	-2.13662	-0.00520472	0.0952126	5.0674	1.26904	9.12317	0.0115726	4.19103	0.20704	8.00652	0.0372944	0.99988	0.0439878	0.0423699		P04075	Fructose-bisphosphate aldolase A	ALDOA, ALDA	364 AA
lavaan_mediation_preBEP_prot_depletedpn12_waz2.csv	preBEP	depleted	P13591	pn12	waz	2	142	-0.0879887	-0.219953	-0.00627013	0.112241	0.445859	0.0413858	0.821023	0.013631	0.35787	-0.0169259	0.752829	0.0520601	0.999009	0.0711234	0.0697312		P13591	Neural cell adhesion molecule 1	NCAM1, NCAM	858 AA
lavaan_mediation_preBEP_prot_depletedpn12_waz4.csv	preBEP	depleted	P13591	pn12	waz	4	140	-0.0722931	-0.191315	-0.0059685	0.154008	0.374857	0.00269769	0.734958	0.0367855	0.302563	-0.0840053	0.676646	0.105639	0.999994	0.145806	0.13926		P13591	Neural cell adhesion molecule 1	NCAM1, NCAM	858 AA
lavaan_mediation_preBEP_prot_depletedpn56_muac6.csv	preBEP	depleted	P16070	pn56	muac	6	123	-1.55532	-3.19732	-0.161504	0.0355473	3.88636	0.0278037	7.67332	0.056884	2.33104	-1.66315	6.34843	0.254199	0.999386	0.314227	0.285734		P16070	CD44 antigen	CD44, LHR, MDU2, MDU3, MIC4	742 AA
lavaan_mediation_preBEP_prot_depletedpn56_waz7.csv	preBEP	depleted	P16070	pn56	waz	7	110	-0.143521	-0.31266	-0.0152233	0.052561	0.678687	0.199423	1.05712	0.000748485	0.535167	0.0645329	0.987571	0.0172631	0.999564	0.0279763	0.0263889		P16070	CD44 antigen	CD44, LHR, MDU2, MDU3, MIC4	742 AA
lavaan_mediation_preBEP_prot_depletedpn56_whz7.csv	preBEP	depleted	P16070	pn56	whz	7	110	-0.118725	-0.27381	-0.00631589	0.0604189	0.514759	0.0319527	0.925896	0.0210603	0.396033	-0.0965977	0.801217	0.0874564	0.999153	0.111222	0.106667		P16070	CD44 antigen	CD44, LHR, MDU2, MDU3, MIC4	742 AA
lavaan_mediation_preBEP_prot_depletedpn12_muac4.csv	preBEP	depleted	P19320	pn12	muac	4	140	-0.74276	-1.91405	-0.037864	0.112502	4.93379	1.16012	8.23996	0.00592966	4.19103	0.79233	7.3571	0.0180448	0.99988	0.0439878	0.0420861		P19320	Vascular cell adhesion protein 1	VCAM1	739 AA
lavaan_mediation_preBEP_prot_depletedpn56_waz6.csv	preBEP	depleted	P25311	pn56	waz	6	123	-0.155782	-0.369876	-0.0145324	0.071484	0.343817	0.0449487	0.70324	0.0657707	0.188035	-0.208594	0.59479	0.325351	0.999636	0.434286	0.391155		P25311	Zinc-alpha-2-glycoprotein	AZGP1, ZAG, ZNGP1	298 AA
lavaan_mediation_preBEP_prot_depletedpn56_waz7.csv	preBEP	depleted	P25311	pn56	waz	7	110	-0.139945	-0.372635	-0.0172968	0.129778	0.675112	0.219171	1.0483	0.000590536	0.535167	0.016901	0.950198	0.0154498	0.999564	0.0279763	0.0263889		P25311	Zinc-alpha-2-glycoprotein	AZGP1, ZAG, ZNGP1	298 AA
lavaan_mediation_preBEP_prot_depletedpn56_weight7.csv	preBEP	depleted	P25311	pn56	weight	7	110	-0.10651	-0.286541	-0.00847489	0.151175	0.61127	0.222415	0.964033	0.000681089	0.50476	0.128006	0.893362	0.00952023	0.999696	0.0170528	0.015766		P25311	Zinc-alpha-2-glycoprotein	AZGP1, ZAG, ZNGP1	298 AA
lavaan_mediation_preBEP_prot_naivepn12_muac4.csv	preBEP	naive	P49908	pn12	muac	4	140	-1.52615	-3.01005	-0.0764957	0.0414765	5.71718	1.30818	10.0467	0.00331545	4.19103	0.370846	8.07827	0.0227144	0.999071	0.0511488	0.0417438		P49908	Selenoprotein P	SELENOP, SELP, SEPP1	381 AA
lavaan_mediation_preBEP_prot_naivepn12_muac2.csv	preBEP	naive	P49908	pn12	muac	2	142	-1.50344	-2.90864	-0.391489	0.0237997	4.72133	1.70609	8.08814	0.00141536	3.21788	0.188345	6.14832	0.0201492	0.999125	0.0753137	0.0527139		P49908	Selenoprotein P	SELENOP, SELP, SEPP1	381 AA
lavaan_mediation_preBEP_prot_naivepn12_muac3.csv	preBEP	naive	P49908	pn12	muac	3	143	-1.41118	-3.0443	-0.0396699	0.0551979	5.54413	1.44805	9.14335	0.00613498	4.13295	0.358924	7.81675	0.0249332	0.999873	0.0471589	0.0361348		P49908	Selenoprotein P	SELENOP, SELP, SEPP1	381 AA
lavaan_mediation_preBEP_prot_depletedpn12_waz2.csv	preBEP	depleted	P51812	pn12	waz	2	142	-0.0925204	-0.22454	-0.000230362	0.120304	0.450391	0.0953639	0.807606	0.00866654	0.35787	0.0143315	0.728247	0.0421009	0.999009	0.0711234	0.0697312		P51812	Ribosomal protein S6 kinase alpha-3	RPS6KA3, ISPK1, MAPKAPK1B, RSK2	740 AA
lavaan_mediation_preBEP_prot_naivepn56_waz7.csv	preBEP	naive	P55056	pn56	waz	7	110	0.0916524	0.00164075	0.226383	0.107023	0.443514	0.0033756	0.850721	0.05549	0.535167	0.0893084	0.971815	0.0181702	0.999662	0.0560069	0.0257547		P55056	Apolipoprotein C-IV	APOC4	127 AA
lavaan_mediation_preBEP_prot_naivepn56_weight7.csv	preBEP	naive	P55056	pn56	weight	7	110	0.0976771	0.0137913	0.210372	0.0522419	0.407083	0.000797689	0.799205	0.0340873	0.50476	0.0971487	0.897969	0.00723862	0.999295	0.0344049	0.0154002		P55056	Apolipoprotein C-IV	APOC4	127 AA
lavaan_mediation_preBEP_prot_naivepn56_hc7.csv	preBEP	naive	P55056	pn56	hc	7	110	0.134551	0.0130449	0.275286	0.0495153	0.442283	0.0104348	1.00609	0.109455	0.576833	0.133345	1.15838	0.0361459	0.999386	0.109792	0.0425276		P55056	Apolipoprotein C-IV	APOC4	127 AA
lavaan_mediation_preBEP_prot_depletedpn56_hc6.csv	preBEP	depleted	P55058	pn56	hc	6	123	-1.38504	-3.35062	-0.0900486	0.0722125	5.50951	0.19025	10.7871	0.0246905	4.12447	-1.06269	9.44547	0.0996374	0.999898	0.173835	0.15407		P55058	Phospholipid transfer protein	PLTP	493 AA
lavaan_mediation_preBEP_prot_depletedpn56_height6.csv	preBEP	depleted	P55058	pn56	height	6	123	-0.278595	-0.609175	-0.016049	0.0649523	0.847425	0.0030702	1.74903	0.0537722	0.568829	-0.361828	1.51397	0.228707	0.999835	0.331309	0.271405		P55058	Phospholipid transfer protein	PLTP	493 AA
lavaan_mediation_preBEP_prot_depletedpn12_waz2.csv	preBEP	depleted	P78527	pn12	waz	2	142	-0.0673849	-0.190025	-0.00018312	0.167057	0.425255	0.0219797	0.784002	0.0227737	0.35787	-0.0358761	0.702206	0.0532902	0.999009	0.0711234	0.0697312		P78527	DNA-dependent protein kinase catalytic subunit	PRKDC, HYRC, HYRC1	4,128 AA
lavaan_mediation_preBEP_prot_naivepn56_waz7.csv	preBEP	naive	Q08257	pn56	waz	7	110	0.0842044	0.00300909	0.223469	0.140954	0.450962	0.00139746	0.963655	0.0635138	0.535167	0.0769543	1.0083	0.0189761	0.999662	0.0637098	0.0257547		Q08257	Zeta-crystallin	CRYZ	329 AA
lavaan_mediation_preBEP_prot_depletedpn12_waz2.csv	preBEP	depleted	Q14126	pn12	waz	2	142	-0.148948	-0.340004	-0.0260191	0.0597775	0.506818	0.132146	0.876893	0.00473374	0.35787	-0.0549445	0.731062	0.0434791	0.999009	0.0711234	0.0697312		Q14126	Desmoglein-2	DSG2, CDHF5	1,118 AA
lavaan_mediation_preBEP_prot_depletedpn12_waz3.csv	preBEP	depleted	Q14126	pn12	waz	3	143	-0.134362	-0.295112	-0.0301139	0.0477179	0.462734	0.0409692	0.855749	0.0135625	0.328372	-0.0670646	0.720384	0.0781828	0.999243	0.0909044	0.0909879		Q14126	Desmoglein-2	DSG2, CDHF5	1,118 AA
lavaan_mediation_preBEP_prot_depletedpn12_weight3.csv	preBEP	depleted	Q14126	pn12	weight	3	143	-0.071737	-0.171492	-0.00582238	0.0820532	0.32869	0.0445205	0.609724	0.0244007	0.256953	-0.0609659	0.551877	0.0717117	0.999526	0.0804168	0.0815523		Q14126	Desmoglein-2	DSG2, CDHF5	1,118 AA
lavaan_mediation_preBEP_prot_depletedpn12_weight2.csv	preBEP	depleted	Q14126	pn12	weight	2	142	-0.0698159	-0.191962	-0.00145903	0.134943	0.313273	0.05328	0.546854	0.0095423	0.243458	-0.0229021	0.460738	0.0452617	0.999771	0.0637461	0.0613845		Q14126	Desmoglein-2	DSG2, CDHF5	1,118 AA
lavaan_mediation_preBEP_prot_naivepn12_waz2.csv	preBEP	naive	Q15428	pn12	waz	2	142	-0.130737	-0.258592	-0.0327856	0.0184456	0.488607	0.0475729	0.814196	0.00679254	0.35787	-0.0233305	0.683871	0.0372153	0.998888	0.0728268	0.0694321		Q15428	Splicing factor 3A subunit 2	SF3A2, SAP62	464 AA
lavaan_mediation_preBEP_prot_naivepn12_waz4.csv	preBEP	naive	Q15428	pn12	waz	4	140	-0.124609	-0.257013	-0.02046	0.0360509	0.427172	0.00803243	0.791835	0.0278813	0.302563	-0.0858583	0.680836	0.115032	0.999797	0.148732	0.138192		Q15428	Splicing factor 3A subunit 2	SF3A2, SAP62	464 AA
lavaan_mediation_preBEP_prot_naivepn12_waz3.csv	preBEP	naive	Q15428	pn12	waz	3	143	-0.124097	-0.249594	-0.0272854	0.0292261	0.452469	0.0662571	0.792195	0.00969294	0.328372	-0.0329473	0.652754	0.0537926	0.999955	0.0933951	0.0891149		Q15428	Splicing factor 3A subunit 2	SF3A2, SAP62	464 AA
lavaan_mediation_preBEP_prot_naivepn12_weight3.csv	preBEP	naive	Q15428	pn12	weight	3	143	-0.0654994	-0.147152	-0.00430208	0.0763009	0.322452	0.00464346	0.586516	0.0178892	0.256953	-0.0483767	0.448907	0.0475281	0.999924	0.0871976	0.0801319		Q15428	Splicing factor 3A subunit 2	SF3A2, SAP62	464 AA
lavaan_mediation_preBEP_prot_naivepn12_weight2.csv	preBEP	naive	Q15428	pn12	weight	2	142	-0.0606563	-0.130033	-0.00594599	0.0611496	0.304114	0.0368317	0.542076	0.0116053	0.243458	-0.00194966	0.474342	0.0324366	0.999991	0.0653697	0.0609283		Q15428	Splicing factor 3A subunit 2	SF3A2, SAP62	464 AA
lavaan_mediation_preBEP_prot_depletedpn12_waz2.csv	preBEP	depleted	Q7Z398	pn12	waz	2	142	-0.08038	-0.228615	-0.00189914	0.162074	0.43825	0.153614	0.772335	0.00919598	0.35787	0.0412909	0.697272	0.0394915	0.999009	0.0711234	0.0697312		Q7Z398	Zinc finger protein 550	ZNF550	422 AA
lavaan_mediation_preBEP_prot_depletedpn12_waz2.csv	preBEP	depleted	Q8IW92	pn12	waz	2	142	-0.0788715	-0.227653	-0.00197473	0.161557	0.436742	0.135898	0.807585	0.0120711	0.35787	0.0083999	0.734719	0.0459253	0.999009	0.0711234	0.0697312		Q8IW92	Beta-galactosidase-1-like protein 2	GLB1L2, MSTP014, UNQ210/PRO236	636 AA
lavaan_mediation_preBEP_prot_depletedpn12_waz2.csv	preBEP	depleted	Q8IZF2	pn12	waz	2	142	-0.0796465	-0.184666	-0.00885788	0.0759329	0.437517	0.0397148	0.753235	0.0146447	0.35787	-0.0217108	0.680704	0.035989	0.999009	0.0711234	0.0697312		Q8IZF2	Adhesion G protein-coupled receptor F5	ADGRF5, GPR116, KIAA0758	1,346 AA
lavaan_mediation_preBEP_prot_depletedpn12_waz3.csv	preBEP	depleted	Q8IZF2	pn12	waz	3	143	-0.065227	-0.17631	-0.00202796	0.126106	0.393599	0.021637	0.766247	0.0318223	0.328372	-0.0330739	0.665145	0.0671958	0.999243	0.0909044	0.0909879		Q8IZF2	Adhesion G protein-coupled receptor F5	ADGRF5, GPR116, KIAA0758	1,346 AA
lavaan_mediation_preBEP_prot_depletedpn56_whz7.csv	preBEP	depleted	Q8NHQ9	pn56	whz	7	110	-0.104788	-0.358647	-0.0108627	0.24248	0.500821	0.00581146	0.961381	0.0253306	0.396033	-0.0571543	0.842382	0.0700471	0.999153	0.111222	0.106667		Q8NHQ9	ATP-dependent RNA helicase DDX55	DDX55, KIAA1595	600 AA
lavaan_mediation_preBEP_prot_depletedpn56_hc6.csv	preBEP	depleted	Q96N11	pn56	hc	6	123	-1.2743	-2.48052	-0.070924	0.0492694	5.39877	0.983089	9.74411	0.0204394	4.12447	-0.671258	9.32436	0.0965601	0.999898	0.173835	0.15407		Q96N11	Integrator complex subunit 15	INTS15, C7orf26	449 AA
lavaan_mediation_preBEP_prot_depletedpn56_height6.csv	preBEP	depleted	Q96N11	pn56	height	6	123	-0.275266	-0.583853	-0.0506588	0.065385	0.844095	0.0568148	1.72506	0.0514831	0.568829	-0.266209	1.38615	0.197902	0.999835	0.331309	0.271405		Q96N11	Integrator complex subunit 15	INTS15, C7orf26	449 AA
lavaan_mediation_preBEP_prot_depletedpn56_haz7.csv	preBEP	depleted	Q96N11	pn56	haz	7	110	-0.142256	-0.302302	-0.0134288	0.0696618	0.53639	0.101318	0.970753	0.016559	0.394133	-0.0648482	0.861685	0.0801218	0.999633	0.167088	0.141717		Q96N11	Integrator complex subunit 15	INTS15, C7orf26	449 AA
lavaan_mediation_preBEP_prot_depletedpn56_waz7.csv	preBEP	depleted	Q96N11	pn56	waz	7	110	-0.135279	-0.275857	-0.0177123	0.0515939	0.670446	0.196603	1.12796	0.0049233	0.535167	0.074036	1.00418	0.0226201	0.999564	0.0279763	0.0264573		Q96N11	Integrator complex subunit 15	INTS15, C7orf26	449 AA
lavaan_mediation_preBEP_prot_naivepn12_waz2.csv	preBEP	naive	Q9N2J8	pn12	waz	2	142	-0.101404	-0.231274	-0.0119117	0.0626675	0.459274	0.0456728	0.816802	0.0171162	0.35787	-0.0286843	0.692297	0.0583794	0.998888	0.0728268	0.0694321		Q9N2J8	HERV-H_2q24.1 provirus ancestral Env polyprotein		555 AA
lavaan_mediation_preBEP_prot_naivepn12_waz3.csv	preBEP	naive	Q9N2J8	pn12	waz	3	143	-0.0718872	-0.174033	-0.000910387	0.136146	0.400259	0.0149019	0.860488	0.0421235	0.328372	-0.0403556	0.745567	0.0951493	0.999955	0.0933951	0.0968464		Q9N2J8	HERV-H_2q24.1 provirus ancestral Env polyprotein		555 AA
lavaan_mediation_preBEP_prot_naivepn12_weight2.csv	preBEP	naive	Q9N2J8	pn12	weight	2	142	-0.051933	-0.126248	-0.003772	0.0741981	0.295391	0.0109924	0.528513	0.0290245	0.243458	-0.0387748	0.467119	0.0664553	0.999991	0.0653697	0.0668668		Q9N2J8	HERV-H_2q24.1 provirus ancestral Env polyprotein		555 AA

## Sheet: pathway
source_file	N feature as reference	N feature significant	pathway	overlap_size	pathway_size	p-value	overlap_EmpiricalCompounds	Input m/z	RT	compounds	compound_names	feature	ionization_mode	beta_semi	mediator	dataset	timepoint	outcome	months	n	ind_est	ind_l	ind_u
mediator_infant_vams_pn12_pos	79	20	Histidine metabolism	1	1	0.00042	E4	93.045	0.102	C05130	Imidazole-4-acetaldehyde; Imidazole acetaldehyde	vam_1000105	positive	-0.00878529	vam_1000105	infant vams	1–2m	hc	2m	280	-0.537936	-1.35825	-0.0662771
mediator_infant_vams_pn12_pos	79	20	Histidine metabolism	1	1	0.00042	E4	93.045	0.102	C05130	Imidazole-4-acetaldehyde; Imidazole acetaldehyde	vam_1000105	positive	-0.00878529	vam_1000105	infant vams	1–2m	hc	3m	279	-0.772992	-1.56808	-0.0371043
mediator_infant_vams_pn12_pos	79	20	Histidine metabolism	1	1	0.00042	E4	93.045	0.102	C05130	Imidazole-4-acetaldehyde; Imidazole acetaldehyde	vam_1000105	positive	-0.00878529	vam_1000105	infant vams	1–2m	hc	4m	277	-0.77855	-1.59838	-0.187147
mediator_infant_vams_pn56_neg	13	4	Drug metabolism - cytochrome P450	1	1	8e-05	E11	276.085	0.206	C16612	Citalopram aldehyde	vam_2005961	Negative	-0.0127628	vam_2005961	infant vams	5–6m	waz	7m	210	-0.083917	-0.188874	-0.0187317
mediator_infant_vams_pn56_neg	13	4	Drug metabolism - cytochrome P450	1	1	8e-05	E11	276.085	0.206	C16612	Citalopram aldehyde	vam_2005961	Negative	-0.0127628	vam_2005961	infant vams	5–6m	weight	7m	211	-0.0625642	-0.137428	-0.00574696
mediator_infant_vams_pn56_neg	13	4	Drug metabolism - cytochrome P450	1	1	8e-05	E11	276.085	0.206	C16612	Citalopram aldehyde	vam_2005961	Negative	-0.0127628	vam_2005961	infant vams	5–6m	whz	7m	210	-0.0903523	-0.207517	-0.0193015
mediator_milk_1421_neg	92	24	Vitamin H (biotin) metabolism	1	1	8e-05	E8	145.097	0.012	C00047	L-Lysine	rLC_neg_mtb_152071	Negative	0.00806197	rLC_neg_mtb_152071	milk	14–21d	hc	2m	269	0.712316	0.105567	1.3758
mediator_milk_1421_neg	92	24	Lipoate metabolism	1	1	8e-05	E8	145.097	0.012	C00047	L-Lysine	rLC_neg_mtb_152071	Negative	0.00806197	rLC_neg_mtb_152071	milk	14–21d	hc	2m	269	0.712316	0.105567	1.3758
mediator_milk_1421_neg	92	24	Aspartate and asparagine metabolism	1	1	8e-05	E8	145.097	0.012	C00047	L-Lysine	rLC_neg_mtb_152071	Negative	0.00806197	rLC_neg_mtb_152071	milk	14–21d	hc	2m	269	0.712316	0.105567	1.3758
mediator_milk_1421_neg	92	24	Lysine metabolism	1	1	8e-05	E8	145.097	0.012	C00047	L-Lysine	rLC_neg_mtb_152071	Negative	0.00806197	rLC_neg_mtb_152071	milk	14–21d	hc	2m	269	0.712316	0.105567	1.3758
mediator_milk_pn34_neg	58	15	Omega-3 fatty acid metabolism	1	1	0.00647	E11	1080.31	0.089	CE4828	trans-2-all-cis-6,9,12,15,18,21-tetracosaheptaenoyl-CoA	rLC_neg_mtb_1215342	Negative	-0.0104362	rLC_neg_mtb_1215342	milk	3–4m	weight	4m	274	0.0584976	0.0112218	0.126026
mediator_milk_pn34_neg	58	15	Butanoate metabolism	1	1	0.00647	E7	67.0189	0.143	C06145	3-Butyn-1-al	rLC_neg_mtb_1975961	Negative	0.00856765	rLC_neg_mtb_1975961	milk	3–4m	muac	4m	274	0.681457	0.105941	1.45973
mediator_milk_pn34_neg	58	15	Tyrosine metabolism	1	2	0.01344	E6	67.0189	0.143	C07086, C03765	Phenylacetic acid; Benzylformic acid; Phenylacetate; Benzeneacetiic acid$4-Hydroxyphenylacetaldehyde	rLC_neg_mtb_1975961	Negative	0.00856765	rLC_neg_mtb_1975961	milk	3–4m	weight	4m	274	0.0428132	0.00677295	0.0941416
mediator_milk_pn34_neg	58	15	Tyrosine metabolism	1	2	0.01344	E6	67.0189	0.143	C07086, C03765	Phenylacetic acid; Benzylformic acid; Phenylacetate; Benzeneacetiic acid$4-Hydroxyphenylacetaldehyde	rLC_neg_mtb_1975961	Negative	0.00856765	rLC_neg_mtb_1975961	milk	3–4m	whz	4m	274	0.0446633	0.00264075	0.0979294
mediator_mother_plasma_pn12_pos	7	2	Glycolysis and Gluconeogenesis	1	1	8e-05	E2	162.977	0.126067	C00227	Acetyl phosphate	rLC_pos_mtb_1693385	Positive	-0.47361	rLC_pos_mtb_1693385	mother plasma	1–2m	muac	4m	81	-1.50059	-3.3878	-0.069927
mediator_mother_vams_pn56_neg	35	9	Pyrimidine metabolism	1	1	8e-05	E2	393.988	0.146	C06198	P1,P4-Bis(5'-uridyl) tetraphosphate; UppppU	vam_2011129	Negative	-0.00998234	vam_2011129	mother vams	5–6m	haz	7m	210	-0.0638755	-0.130542	-0.0046397
mediator_mother_vams_pn56_neg	35	9	Pyrimidine metabolism	1	1	8e-05	E2	393.988	0.146	C06198	P1,P4-Bis(5'-uridyl) tetraphosphate; UppppU	vam_2011129	Negative	-0.00998234	vam_2011129	mother vams	5–6m	waz	7m	210	-0.0963671	-0.205037	-0.00416057
mediator_mother_vams_pn56_neg	35	9	Pyrimidine metabolism	1	1	8e-05	E2	393.988	0.146	C06198	P1,P4-Bis(5'-uridyl) tetraphosphate; UppppU	vam_2011129	Negative	-0.00998234	vam_2011129	mother vams	5–6m	weight	7m	211	-0.0829345	-0.187414	-0.0196079
